# Supplementary material for: Pd(ii)-catalyzed selective β-C–H functionalization of azobenzene carboxamides
Source: Royal Society of Chemistry journal article supplement (doi:10.1039/d2ob02261c), 2023-01-01
Supplement: d2ob02261c1.pdf [file d2ob02261c1.pdf]

## Supplementary information

### Pd(II)-catalyzed selective $\beta$ -C-H functionalization of azobenzene carboxamides

Rayavarapu Padmavathi and Srinivasarao Arulananda Babu\*

*Department of Chemical Sciences, Indian Institute of Science Education and Research (IISER) Mohali, Knowledge City, Sector 81, SAS Nagar, Mohali, Manauli P.O., Punjab, India, 140306. E-mail: sababu@iisermohali.ac.in.*

#### Contents

|                                                                 |                |
|-----------------------------------------------------------------|----------------|
| X-ray structure of and brief crystal data of compound <b>20</b> | = page 2-3     |
| Copies of NMRs of compounds                                     | = page 4-329   |
| Experimental procedures and characterization data               | = page 330-368 |

# X-ray structure of compound **20**

CCDC 2226308

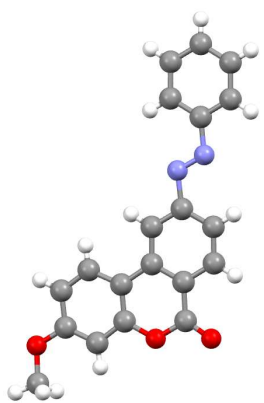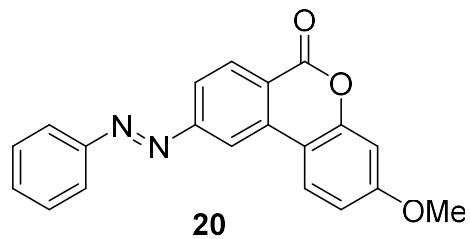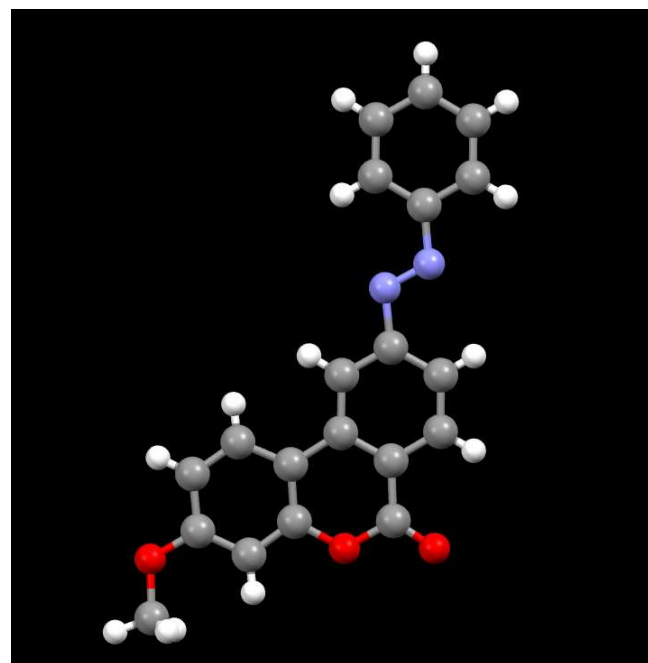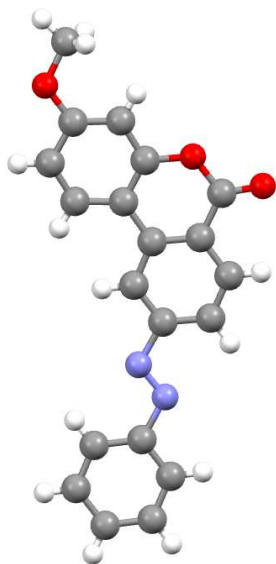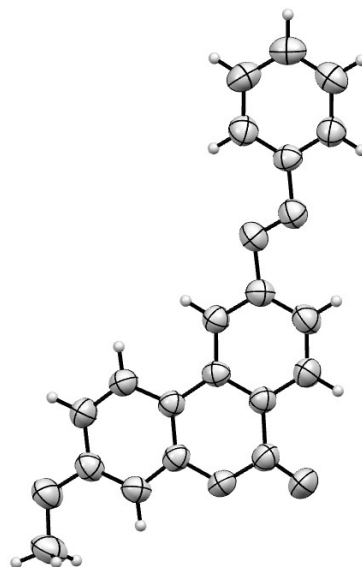

ORTEP structure (ellipsoid probability = 50%)

# checkCIF/PLATON report

Structure factors have been supplied for datablock(s) rp1338

THIS REPORT IS FOR GUIDANCE ONLY. IF USED AS PART OF A REVIEW PROCEDURE FOR PUBLICATION, IT SHOULD NOT REPLACE THE EXPERTISE OF AN EXPERIENCED CRYSTALLOGRAPHIC REFEREE.

No syntax errors found. CIF dictionary Interpreting this report

## Datablock: rp1338

Bond precision: C-C = 0.0033 A Wavelength=0.71073

Cell: a=8.6384 (9) b=19.8168 (19) c=9.4404 (11)  
alpha=90 beta=99.588 (10) gamma=90

Temperature: 298 K

|                        | Calculated    | Reported      |
|------------------------|---------------|---------------|
| Volume                 | 1593.5 (3)    | 1593.5 (3)    |
| Space group            | P 21/n        | P 1 21/n 1    |
| Hall group             | -P 2yn        | -P 2yn        |
| Moiety formula         | C20 H14 N2 O3 | C20 H14 N2 O3 |
| Sum formula            | C20 H14 N2 O3 | C20 H14 N2 O3 |
| Mr                     | 330.33        | 330.33        |
| Dx, g cm <sup>-3</sup> | 1.377         | 1.377         |
| Z                      | 4             | 4             |
| Mu (mm <sup>-1</sup> ) | 0.094         | 0.094         |
| F000                   | 688.0         | 688.0         |
| F000'                  | 688.32        |               |
| h, k, lmax             | 10, 23, 11    | 10, 23, 11    |
| Nref                   | 2805          | 2799          |
| Tmin, Tmax             | 0.972, 0.972  | 0.997, 1.000  |
| Tmin'                  | 0.972         |               |

Correction method= # Reported T Limits: Tmin=0.997 Tmax=1.000  
AbsCorr = MULTI-SCAN

Data completeness= 0.998 Theta(max)= 24.999

R(reflections)= 0.0507 ( 1782)

wR2(reflections)=  
0.1634 ( 2799)

S = 1.043

Npar= 227

Brief crystal data  
X-ray structure of compound **20**  
CCDC 2226308

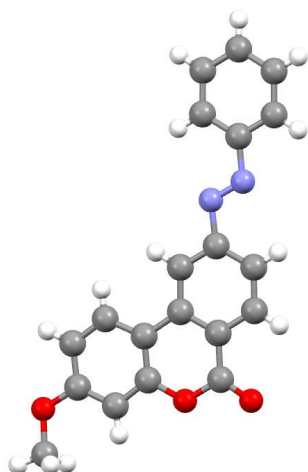

SpinWorks 4: RP 540 FIN  
PROTON CDCl3 /opt/topspin3.5pl2/nmrdata nmrsu 46

10.8505

8.9919  
8.9847  
8.2048  
8.2254  
8.2521  
8.2724  
8.8922  
8.9025  
8.9751  
8.9937  
7.2851  
7.4983  
7.5088  
7.5191  
7.5291  
7.0995

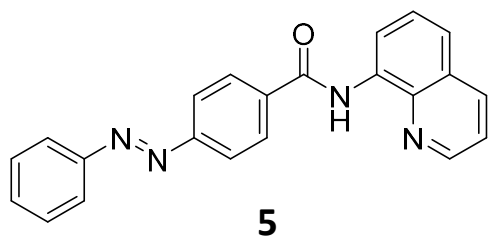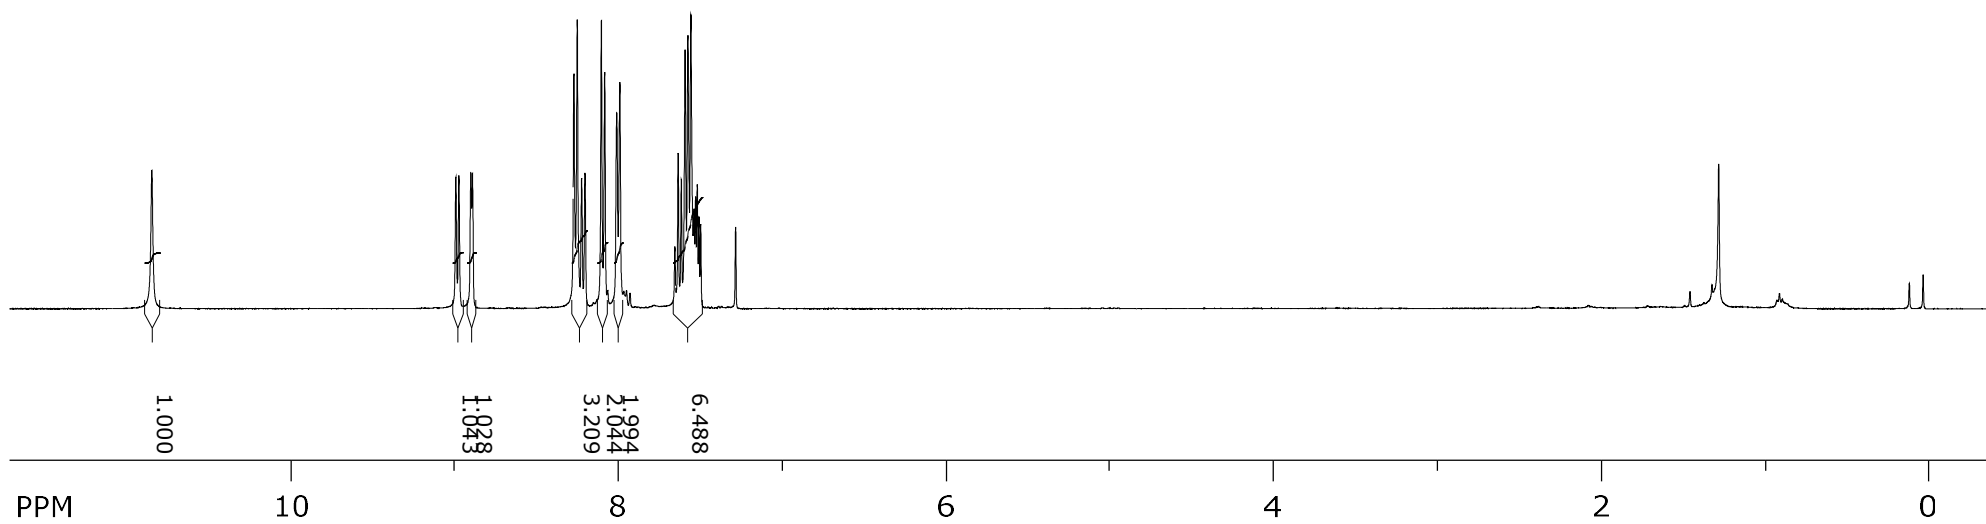

SpinWorks 4: RP 540 FIN  
PROTON CDCl3 /opt/topspin3.5pl2/nmrdata nmrsu 46

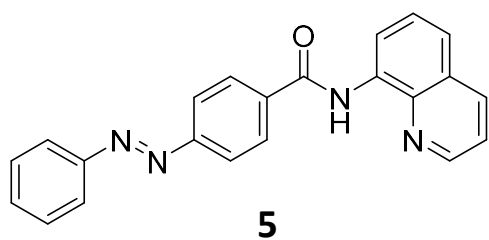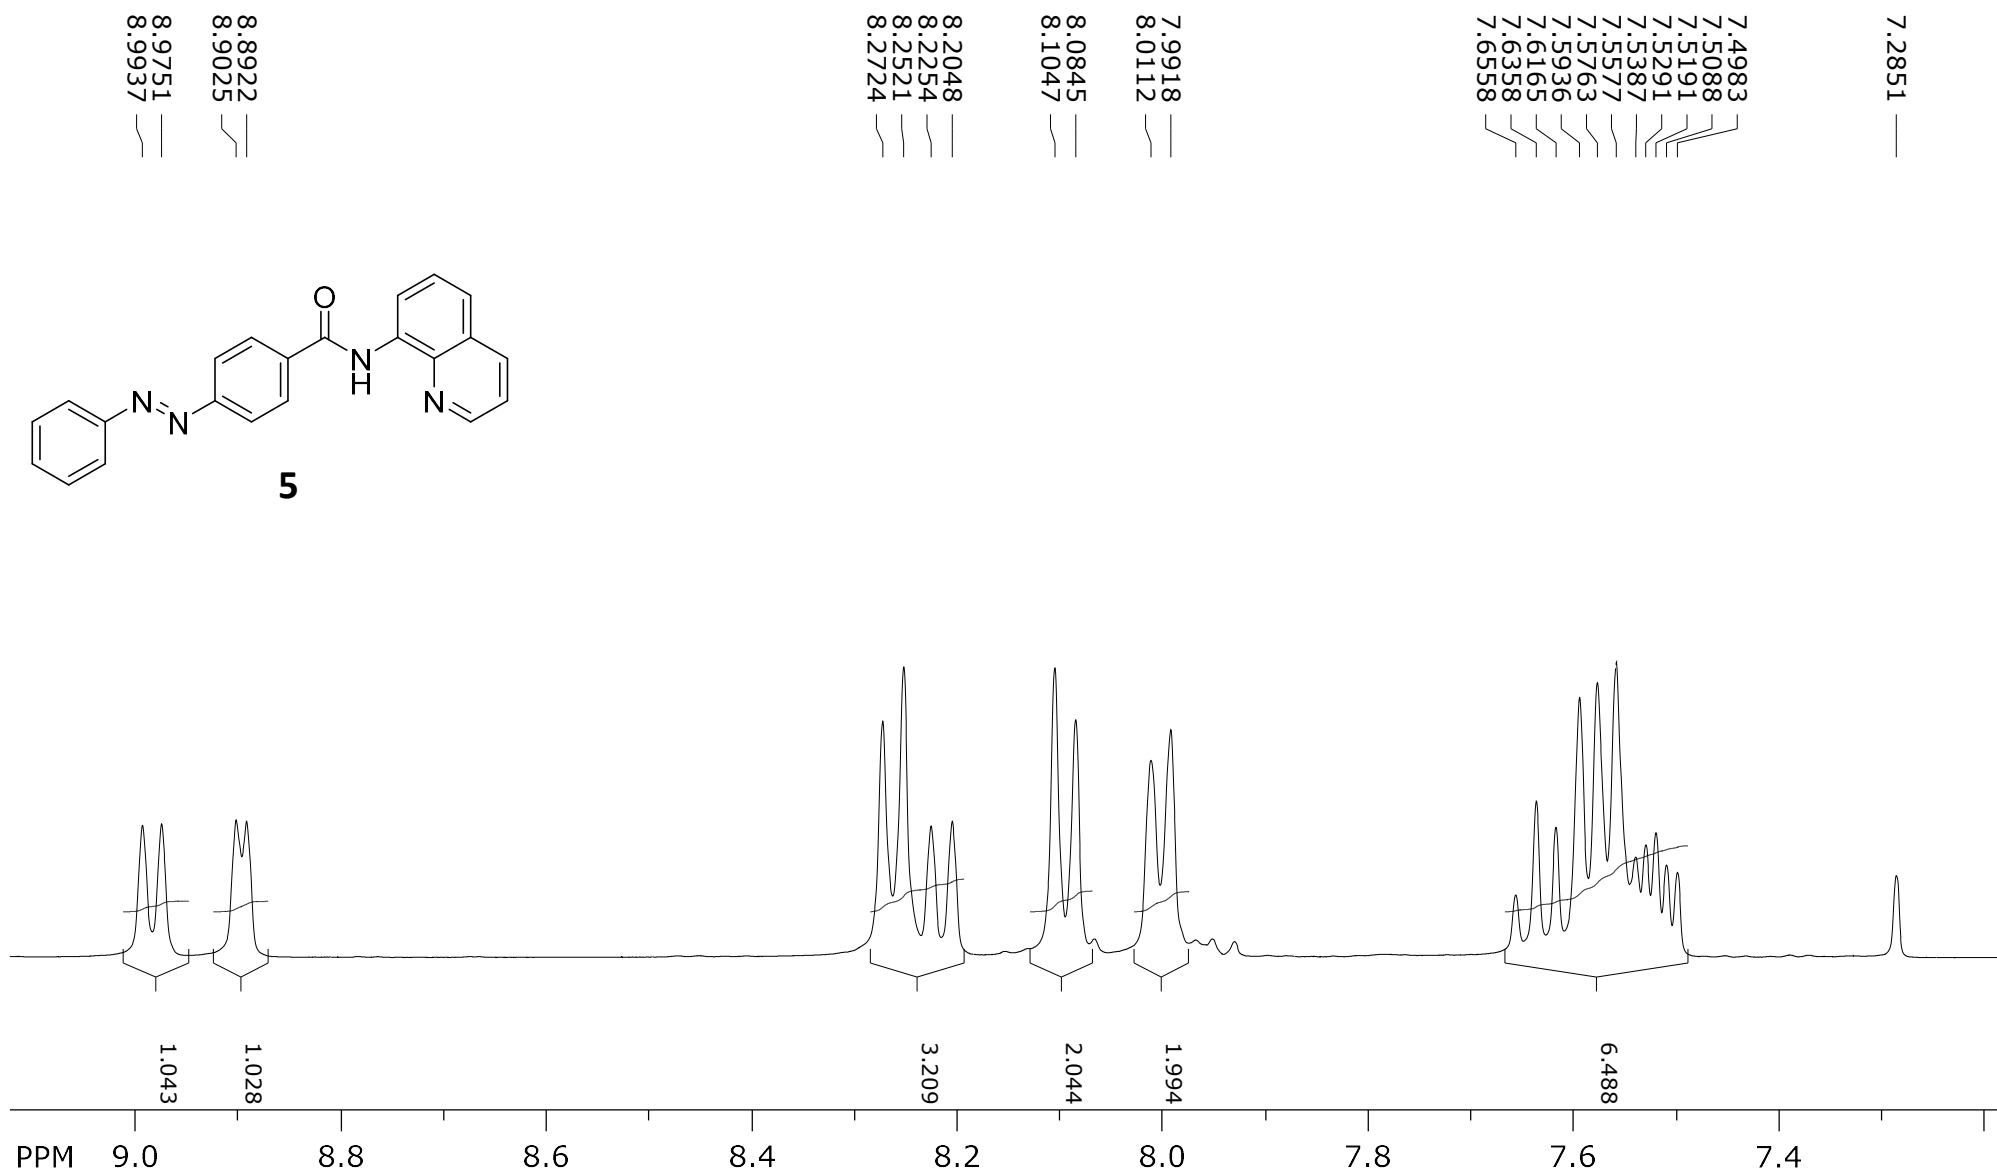

SpinWorks 4: RP 540 FIN  
C13CPD CDCI3 /opt/topspin3.5pl2/nmrdata nmrsu 46

164.693  
154.467  
152.578  
148.411  
138.774  
136.810  
136.482  
134.448  
131.674  
129.223  
128.349  
128.027  
127.502  
123.186  
121.964  
121.809  
116.696

76.761  
77.078  
77.396

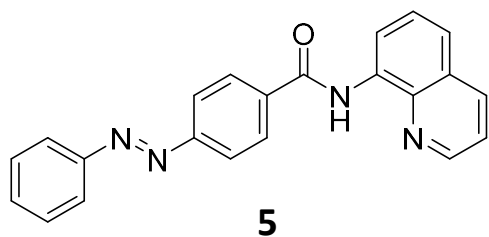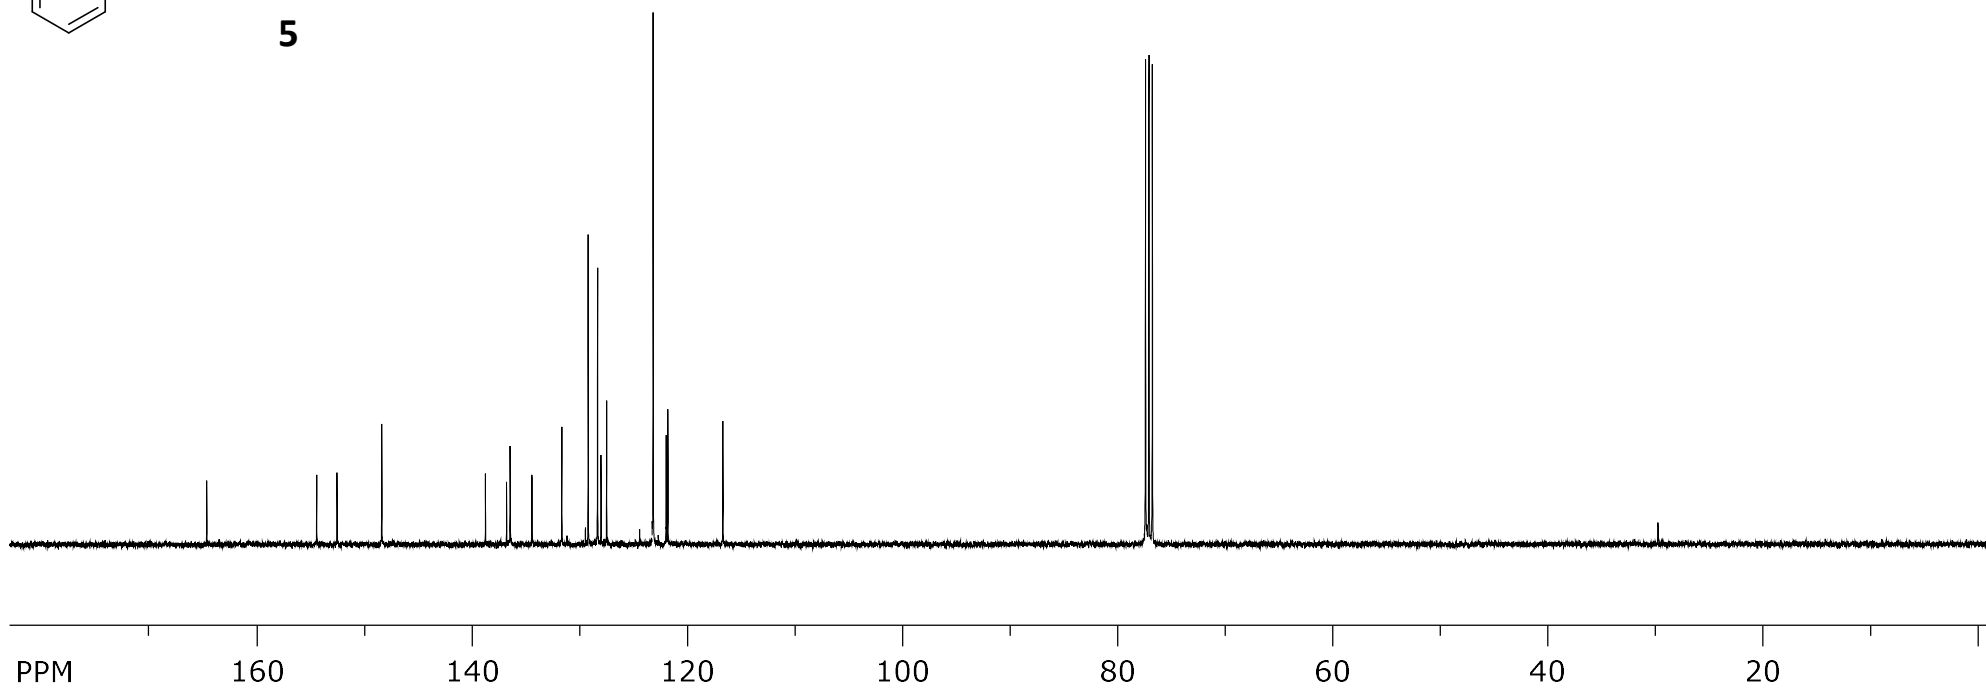

SpinWorks 4: RP 1024 B2  
PROTON CDCl3 /opt/topspin3.5pl2/nmrdata nmrsu 12

9.9756  
8.8261  
8.8228  
8.8079  
8.8045  
8.6727  
8.6699  
8.6670  
8.6641  
8.6612  
8.6583  
8.6554  
8.6525  
8.6496  
8.6467  
8.6438  
8.6409  
8.6380  
8.6351  
8.6322  
8.6293  
8.6264  
8.6235  
8.6206  
8.6177  
8.6148  
8.6119  
8.6090  
8.6061  
8.6032  
8.6003  
8.5974  
8.5945  
8.5916  
8.5887  
8.5858  
8.5829  
8.5800  
8.5771  
8.5742  
8.5713  
8.5684  
8.5655  
8.5626  
8.5597  
8.5568  
8.5539  
8.5510  
8.5481  
8.5452  
8.5423  
8.5394  
8.5365  
8.5336  
8.5307  
8.5278  
8.5249  
8.5220  
8.5191  
8.5162  
8.5133  
8.5104  
8.5075  
8.5046  
8.5017  
8.4988  
8.4959  
8.4930  
8.4901  
8.4872  
8.4843  
8.4814  
8.4785  
8.4756  
8.4727  
8.4698  
8.4669  
8.4640  
8.4611  
8.4582  
8.4553  
8.4524  
8.4495  
8.4466  
8.4437  
8.4408  
8.4379  
8.4350  
8.4321  
8.4292  
8.4263  
8.4234  
8.4205  
8.4176  
8.4147  
8.4118  
8.4089  
8.4060  
8.4031  
8.4002  
8.3973  
8.3944  
8.3915  
8.3886  
8.3857  
8.3828  
8.3799  
8.3770  
8.3741  
8.3712  
8.3683  
8.3654  
8.3625  
8.3596  
8.3567  
8.3538  
8.3509  
8.3480  
8.3451  
8.3422  
8.3393  
8.3364  
8.3335  
8.3306  
8.3277  
8.3248  
8.3219  
8.3190  
8.3161  
8.3132  
8.3103  
8.3074  
8.3045  
8.3016  
8.2987  
8.2958  
8.2929  
8.2900  
8.2871  
8.2842  
8.2813  
8.2784  
8.2755  
8.2726  
8.2697  
8.2668  
8.2639  
8.2610  
8.2581  
8.2552  
8.2523  
8.2494  
8.2465  
8.2436  
8.2407  
8.2378  
8.2349  
8.2320  
8.2291  
8.2262  
8.2233  
8.2204  
8.2175  
8.2146  
8.2117  
8.2088  
8.2059  
8.2030  
8.2001  
8.1972  
8.1943  
8.1914  
8.1885  
8.1856  
8.1827  
8.1798  
8.1769  
8.1740  
8.1711  
8.1682  
8.1653  
8.1624  
8.1595  
8.1566  
8.1537  
8.1508  
8.1479  
8.1450  
8.1421  
8.1392  
8.1363  
8.1334  
8.1305  
8.1276  
8.1247  
8.1218  
8.1189  
8.1160  
8.1131  
8.1102  
8.1073  
8.1044  
8.1015  
8.0986  
8.0957  
8.0928  
8.0899  
8.0870  
8.0841  
8.0812  
8.0783  
8.0754  
8.0725  
8.0696  
8.0667  
8.0638  
8.0609  
8.0580  
8.0551  
8.0522  
8.0493  
8.0464  
8.0435  
8.0406  
8.0377  
8.0348  
8.0319  
8.0290  
8.0261  
8.0232  
8.0203  
8.0174  
8.0145  
8.0116  
8.0087  
8.0058  
8.0029  
7.9999  
7.9970  
7.9941  
7.9912  
7.9883  
7.9854  
7.9825  
7.9796  
7.9767  
7.9738  
7.9709  
7.9680  
7.9651  
7.9622  
7.9593  
7.9564  
7.9535  
7.9506  
7.9477  
7.9448  
7.9419  
7.9390  
7.9361  
7.9332  
7.9303  
7.9274  
7.9245  
7.9216  
7.9187  
7.9158  
7.9129  
7.9100  
7.9071  
7.9042  
7.9013  
7.8984  
7.8955  
7.8926  
7.8897  
7.8868  
7.8839  
7.8810  
7.8781  
7.8752  
7.8723  
7.8694  
7.8665  
7.8636  
7.8607  
7.8578  
7.8549  
7.8520  
7.8491  
7.8462  
7.8433  
7.8404  
7.8375  
7.8346  
7.8317  
7.8288  
7.8259  
7.8230  
7.8201  
7.8172  
7.8143  
7.8114  
7.8085  
7.8056  
7.8027  
7.8000  
7.7971  
7.7942  
7.7913  
7.7884  
7.7855  
7.7826  
7.7797  
7.7768  
7.7739  
7.7710  
7.7681  
7.7652  
7.7623  
7.7594  
7.7565  
7.7536  
7.7507  
7.7478  
7.7449  
7.7420  
7.7391  
7.7362  
7.7333  
7.7304  
7.7275  
7.7246  
7.7217  
7.7188  
7.7159  
7.7130  
7.7101  
7.7072  
7.7043  
7.7014  
7.6985  
7.6956  
7.6927  
7.6898  
7.6869  
7.6840  
7.6811  
7.6782  
7.6753  
7.6724  
7.6695  
7.6666  
7.6637  
7.6608  
7.6579  
7.6550  
7.6521  
7.6492  
7.6463  
7.6434  
7.6405  
7.6376  
7.6347  
7.6318  
7.6289  
7.6260  
7.6231  
7.6202  
7.6173  
7.6144  
7.6115  
7.6086  
7.6057  
7.6028  
7.6000  
7.5971  
7.5942  
7.5913  
7.5884  
7.5855  
7.5826  
7.5797  
7.5768  
7.5739  
7.5710  
7.5681  
7.5652  
7.5623  
7.5594  
7.5565  
7.5536  
7.5507  
7.5478  
7.5449  
7.5420  
7.5391  
7.5362  
7.5333  
7.5304  
7.5275  
7.5246  
7.5217  
7.5188  
7.5159  
7.5130  
7.5101  
7.5072  
7.5043  
7.5014  
7.4985  
7.4956  
7.4927  
7.4898  
7.4869  
7.4840  
7.4811  
7.4782  
7.4753  
7.4724  
7.4695  
7.4666  
7.4637  
7.4608  
7.4579  
7.4550  
7.4521  
7.4492  
7.4463  
7.4434  
7.4405  
7.4376  
7.4347  
7.4318  
7.4289  
7.4260  
7.4231  
7.4202  
7.4173  
7.4144  
7.4115  
7.4086  
7.4057  
7.4028  
7.4000  
7.3971  
7.3942  
7.3913  
7.3884  
7.3855  
7.3826  
7.3797  
7.3768  
7.3739  
7.3710  
7.3681  
7.3652  
7.3623  
7.3594  
7.3565  
7.3536  
7.3507  
7.3478  
7.3449  
7.3420  
7.3391  
7.3362  
7.3333  
7.3304  
7.3275  
7.3246  
7.3217  
7.3188  
7.3159  
7.3130  
7.3101  
7.3072  
7.3043  
7.3014  
7.2985  
7.2956  
7.2927  
7.2898  
7.2869  
7.2840  
7.2811  
7.2782  
7.2753  
7.2724  
7.2695  
7.2666  
7.2637  
7.2608  
7.2579  
7.2550  
7.2521  
7.2492  
7.2463  
7.2434  
7.2405  
7.2376  
7.2347  
7.2318  
7.2289  
7.2260  
7.2231  
7.2202  
7.2173  
7.2144  
7.2115  
7.2086  
7.2057  
7.2028  
7.2000  
7.1971  
7.1942  
7.1913  
7.1884  
7.1855  
7.1826  
7.1797  
7.1768  
7.1739  
7.1710  
7.1681  
7.1652  
7.1623  
7.1594  
7.1565  
7.1536  
7.1507  
7.1478  
7.1449  
7.1420  
7.1391  
7.1362  
7.1333  
7.1304  
7.1275  
7.1246  
7.1217  
7.1188  
7.1159  
7.1130  
7.1101  
7.1072  
7.1043  
7.1014  
7.0985  
7.0956  
7.0927  
7.0898  
7.0869  
7.0840  
7.0811  
7.0782  
7.0753  
7.0724  
7.0695  
7.0666  
7.0637  
7.0608  
7.0579  
7.0550  
7.0521  
7.0492  
7.0463  
7.0434  
7.0405  
7.0376  
7.0347  
7.0318  
7.0289  
7.0260  
7.0231  
7.0202  
7.0173  
7.0144  
7.0115  
7.0086  
7.0057  
7.0028  
7.0000  
6.9971  
6.9942  
6.9913  
6.9884  
6.9855  
6.9826  
6.9797  
6.9768  
6.9739  
6.9710  
6.9681  
6.9652  
6.9623  
6.9594  
6.9565  
6.9536  
6.9507  
6.9478  
6.9449  
6.9420  
6.9391  
6.9362  
6.9333  
6.9304  
6.9275  
6.9246  
6.9217  
6.9188  
6.9159  
6.9130  
6.9101  
6.9072  
6.9043  
6.9014  
6.8985  
6.8956  
6.8927  
6.8898  
6.8869  
6.8840  
6.8811  
6.8782  
6.8753  
6.8724  
6.8695  
6.8666  
6.8637  
6.8608  
6.8579  
6.8550  
6.8521  
6.8492  
6.8463  
6.8434  
6.8405  
6.8376  
6.8347  
6.8318  
6.8289  
6.8260  
6.8231  
6.8202  
6.8173  
6.8144  
6.8115  
6.8086  
6.8057  
6.8028  
6.8000  
6.7971  
6.7942  
6.7913  
6.7884  
6.7855  
6.7826  
6.7797  
6.7768  
6.7739  
6.7710  
6.7681  
6.7652  
6.7623  
6.7594  
6.7565  
6.7536  
6.7507  
6.7478  
6.7449  
6.7420  
6.7391  
6.7362  
6.7333  
6.7304  
6.7275  
6.7246  
6.7217  
6.7188  
6.7159  
6.7130  
6.7101  
6.7072  
6.7043  
6.7014  
6.6985  
6.6956  
6.6927  
6.6898  
6.6869  
6.6840  
6.6811  
6.6782  
6.6753  
6.6724  
6.6695  
6.6666  
6.6637  
6.6608  
6.6579  
6.6550  
6.6521  
6.6492  
6.6463  
6.6434  
6.6405  
6.6376  
6.6347  
6.6318  
6.6289  
6.6260  
6.6231  
6.6202  
6.6173  
6.6144  
6.6115  
6.6086  
6.6057  
6.6028  
6.6000  
6.5971  
6.5942  
6.5913  
6.5884  
6.5855  
6.5826  
6.5797  
6.5768  
6.5739  
6.5710  
6.5681  
6.5652  
6.5623  
6.5594  
6.5565  
6.5536  
6.5507  
6.5478  
6.5449  
6.5420  
6.5391  
6.5362  
6.5333  
6.5304  
6.5275  
6.5246  
6.5217  
6.5188  
6.5159  
6.5130  
6.5101  
6.5072  
6.5043  
6.5014  
6.4985  
6.4956  
6.4927  
6.4898  
6.4869  
6.4840  
6.4811  
6.4782  
6.4753  
6.4724  
6.4695  
6.4666  
6.4637  
6.4608  
6.4579  
6.4550  
6.4521  
6.4492  
6.4463  
6.4434  
6.4405  
6.4376  
6.4347  
6.4318  
6.4289  
6.4260  
6.4231  
6.4202  
6.4173  
6.4144  
6.4115  
6.4086  
6.4057  
6.4028  
6.4000  
6.3971  
6.3942  
6.3913  
6.3884  
6.3855  
6.3826  
6.3797  
6.3768  
6.3739  
6.3710  
6.3681  
6.3652  
6.3623  
6.3594  
6.3565  
6.3536  
6.3507  
6.3478  
6.3449  
6.3420  
6.3391  
6.3362  
6.3333  
6.3304  
6.3275  
6.3246  
6.3217  
6.3188  
6.3159  
6.3130  
6.3101  
6.3072  
6.3043  
6.3014  
6.2985  
6.2956  
6.2927  
6.2898  
6.2869  
6.2840  
6.2811  
6.2782  
6.2753  
6.2724  
6.2695  
6.2666  
6.2637  
6.2608  
6.2579  
6.2550  
6.2521  
6.2492  
6.2463  
6.2434  
6.2405  
6.2376  
6.2347  
6.2318  
6.2289  
6.2260  
6.2231  
6.2202  
6.2173  
6.2144  
6.2115  
6.2086  
6.2057  
6.2028  
6.2000  
6.1971  
6.1942  
6.1913  
6.1884  
6.1855  
6.1826  
6.1797  
6.1768  
6.1739  
6.1710  
6.1681  
6.1652  
6.1623  
6.1594  
6.1565  
6.1536  
6.1507  
6.1478  
6.1449  
6.1420  
6.1391  
6.1362  
6.1333  
6.1304  
6.1275  
6.1246  
6.1217  
6.1188  
6.1159  
6.1130  
6.1101  
6.1072  
6.1043  
6.1014  
6.0985  
6.0956  
6.0927  
6.0898  
6.0869  
6.0840  
6.0811  
6.0782  
6.0753  
6.0724  
6.0695  
6.0666  
6.0637  
6.0608  
6.0579  
6.0550  
6.0521  
6.0492  
6.0463  
6.0434  
6.0405  
6.0376  
6.0347  
6.0318  
6.0289  
6.0260  
6.0231  
6.0202  
6.0173  
6.0144  
6.0115  
6.0086  
6.0057  
6.0028  
6.0000  
5.9971  
5.9942  
5.9913  
5.9884  
5.9855  
5.9826  
5.9797  
5.9768  
5.9739  
5.9710  
5.9681  
5.9652  
5.9623  
5.9594  
5.9565  
5.9536  
5.9507  
5.9478  
5.9449  
5.9420  
5.9391  
5.9362  
5.9333  
5.9304  
5.9275  
5.9246  
5.9217  
5.9188  
5.9159  
5.9130  
5.9101  
5.9072  
5.9043  
5.9014  
5.8985  
5.8956  
5.8927  
5.8898  
5.8869  
5.8840  
5.8811  
5.8782  
5.8753  
5.8724  
5.8695  
5.8666  
5.8637  
5.8608  
5.8579  
5.8550  
5.8521  
5.8492  
5.8463  
5.8434  
5.8405  
5.8376  
5.8347  
5.8318  
5.8289  
5.8260  
5.8231  
5.8202  
5.8173  
5.8144  
5.8115  
5.8086  
5.8057  
5.8028  
5.8000  
5.7971  
5.7942  
5.7913  
5.7884  
5.7855  
5.7826  
5.7797  
5.7768  
5.7739  
5.7710  
5.7681  
5.7652  
5.7623  
5.7594  
5.7565  
5.7536  
5.7507  
5.7478  
5.7449  
5.7420  
5.7391  
5.7362  
5.7333  
5.7304  
5.7275  
5.7246  
5.7217  
5.7188  
5.7159  
5.7130  
5.7101  
5.7072  
5.7043  
5.7014  
5.6985  
5.6956  
5.6927  
5.6898  
5.6869  
5.6840  
5.6811  
5.6782  
5.6753  
5.6724  
5.6695  
5.6666  
5.6637  
5.6608  
5.6579  
5.6550  
5.6521  
5.6492  
5.6463  
5.6434  
5.6405  
5.6376  
5.6347  
5.6318  
5.6289  
5.6260  
5.6231  
5.6202  
5.6173  
5.6144  
5.6115  
5.6086  
5.6057  
5.6028  
5.6000  
5.5971  
5.5942  
5.5913  
5.5884  
5.5855  
5.5826  
5.5797  
5.5768  
5.5739  
5.5710  
5.5681  
5.5652  
5.5623  
5.5594  
5.5565  
5.5536  
5.5507  
5.5478  
5.5449  
5.5420  
5.5391  
5.5362  
5.5333  
5.5304  
5.5275  
5.5246  
5.5217  
5.5188  
5.5159  
5.5130  
5.5101  
5.5072  
5.5043  
5.5014  
5.4985  
5.4956  
5.4927  
5.4898  
5.4869  
5.4840  
5.4811  
5.4782  
5.4753  
5.4724  
5.4695  
5.4666  
5.4637  
5.4608  
5.4579  
5.4550  
5.4521  
5.4492  
5.4463  
5.4434  
5.4405  
5.4376  
5.4347  
5.4318  
5.4289  
5.4260  
5.4231  
5.4202  
5.4173  
5.4144  
5.4115  
5.4086  
5.4057  
5.4028  
5.4000  
5.3971  
5.3942  
5.3913  
5.3884  
5.3855  
5.3826  
5.3797  
5.3768  
5.3739  
5.3710  
5.3681  
5.3652  
5.3623  
5.3594  
5.3565  
5.3536  
5.3507  
5.3478  
5.3449  
5.3420  
5.3391  
5.3362  
5.3333  
5.3304  
5.3275  
5.3246  
5.3217  
5.3188  
5.3159  
5.3130  
5.3101  
5.3072  
5.3043  
5.3014  
5.2985  
5.2956  
5.2927  
5.2898  
5.2869  
5.2840  
5.2811  
5.2782  
5.2753  
5.2724  
5.2695  
5.2666  
5.2637  
5.2608  
5.2579  
5.2550  
5.2521  
5.2492  
5.2463  
5.2434  
5.2405  
5.2376  
5.2347  
5.2318  
5.2289  
5.2260  
5.2231  
5.2202  
5.2173  
5.2144  
5.2115  
5.2086  
5.2057  
5.2028  
5.2000  
5.1971  
5.1942  
5.1913  
5.1884  
5.1855  
5.1826  
5.1797  
5.1768  
5.1739  
5.1710  
5.1681  
5.1652  
5.1623  
5.1594  
5.1565  
5.1536  
5.1507  
5.1478  
5.1449  
5.1420  
5.1391  
5.1362  
5.1333  
5.1304  
5.1275  
5.1246  
5.1217  
5.1188  
5.1159  
5.1130  
5.1101  
5.1072  
5.1043  
5.1014  
5.0985  
5.0956  
5.0927  
5.0898  
5.0869  
5.0840  
5.0811  
5.0782  
5.0753  
5.0724  
5.0695  
5.0666  
5.0637  
5.0608  
5.0579  
5.0550  
5.0521  
5.0492  
5.0463  
5.0434  
5.0405  
5.0376  
5.0347  
5.0318  
5.0289  
5.0260  
5.0231  
5.0202  
5.0173  
5.0144  
5.0115  
5.0086  
5.0057  
5.0028  
5.0000  
4.9971  
4.9942  
4.9913  
4.9884  
4.9855  
4.9826  
4.9797  
4.9768  
4.9739  
4.9710  
4.9681  
4.9652  
4.9623  
4.9594  
4.9565  
4.9536  
4.9507  
4.9478  
4.9449  
4.9420  
4.9391  
4.9362  
4.9333  
4.9304  
4.9275  
4.9246  
4.9217  
4.9188  
4.9159  
4.9130  
4.9101  
4.9072  
4.9043  
4.9014  
4.8985  
4.8956  
4.8927  
4.8898  
4.8869  
4.8840  
4.8811  
4.8782  
4.8753  
4.8724  
4.8695  
4.8666  
4.8637  
4.8608  
4.8579  
4.8550  
4.8521  
4.8492  
4.8463  
4.8434  
4.8405  
4.8376  
4.8347  
4.8318  
4.8289  
4.8260  
4.8231  
4.8202  
4.8173  
4.8144  
4.8115  
4.8086  
4.8057  
4.8028  
4.8000  
4.7971  
4.7942  
4.7913  
4.7884  
4.7855  
4.7826  
4.7797  
4.7768  
4.7739  
4.7710  
4.7681  
4.7652  
4.7623  
4.7594  
4.7565  
4.7536  
4.7507  
4.7478  
4.7449  
4.7420  
4.7391  
4.7362  
4.7333  
4.7304  
4.7275  
4.7246  
4.7217  
4.7188  
4.7159  
4.7130  
4.7101  
4.7072  
4.7043  
4.7014  
4.6985  
4.6956  
4.6927  
4.6898  
4.6869  
4.6840  
4.6811  
4.6782  
4.6753  
4.6724  
4.6695  
4.6666  
4.6637  
4.6608  
4.6579  
4.6550  
4.6521  
4.6492  
4.6463  
4.6434  
4.6405  
4.6376  
4.6347  
4.6318  
4.6289  
4.6260  
4.6231  
4.6202  
4.6173  
4.6144  
4.6115  
4.6086  
4.6057  
4.6028  
4.6000  
4.5971  
4.5942  
4.5913  
4.5884  
4.5855  
4.5826  
4.5797  
4.5768  
4.5739  
4.5710  
4.5681  
4.5652  
4.5623  
4.5594  
4.5565  
4.5536  
4.5507  
4.5478  
4.5449  
4.5420  
4.5391  
4.5362  
4.5333  
4.5304  
4.5275  
4.5246  
4.5217  
4.5188  
4.5159  
4.5130  
4.5101  
4.5072  
4.5043  
4.5014  
4.4985  
4.4956  
4.4927  
4.4898  
4.4869  
4.4840  
4.4811  
4.4782  
4.4753  
4.4724  
4.4695  
4.4666  
4.4637  
4.4608  
4.4579  
4.4550  
4.4521  
4.4492  
4.4463  
4.4434  
4.4405  
4.4376  
4.4347  
4.4318  
4.4289  
4.4260  
4.4231  
4.4202  
4.4173  
4.4144  
4.4115  
4.4086  
4.4057  
4.4028  
4.4000  
4.3971  
4.3942  
4.3913  
4.3884  
4.3855  
4.3826  
4.3797  
4.3768  
4.3739  
4.3710  
4.3681  
4.3652  
4.3623  
4.3594  
4.3565  
4.3536  
4.3507  
4.3478  
4.3449  
4.3420  
4.3391  
4.3362  
4.3333  
4.3304  
4.3275  
4.3246  
4.3217  
4.3188  
4.3159  
4.3130  
4.3101  
4.3072  
4.3043  
4.3014  
4.2985  
4.2956  
4.2927  
4.2898  
4.2869  
4.2840  
4.2811  
4.2782  
4.2753  
4.2724  
4.2695  
4.2666  
4.2637  
4.2608  
4.2579  
4.2550  
4.2521  
4.2492  
4.2463  
4.2434  
4.2405  
4.

SpinWorks 4: RP 1024 B2  
PROTON CDCl3 /opt/topspin3.5pl2/nmrdata nmrsu 12

8.8228  
8.8261  
8.8045  
8.8079

8.6589  
8.6620  
8.6599  
8.6729

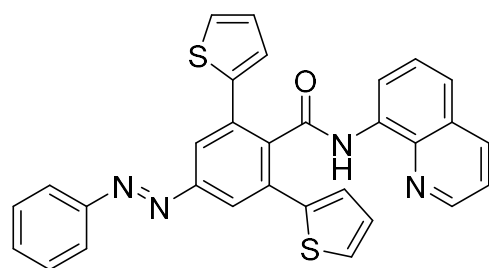

**7a**

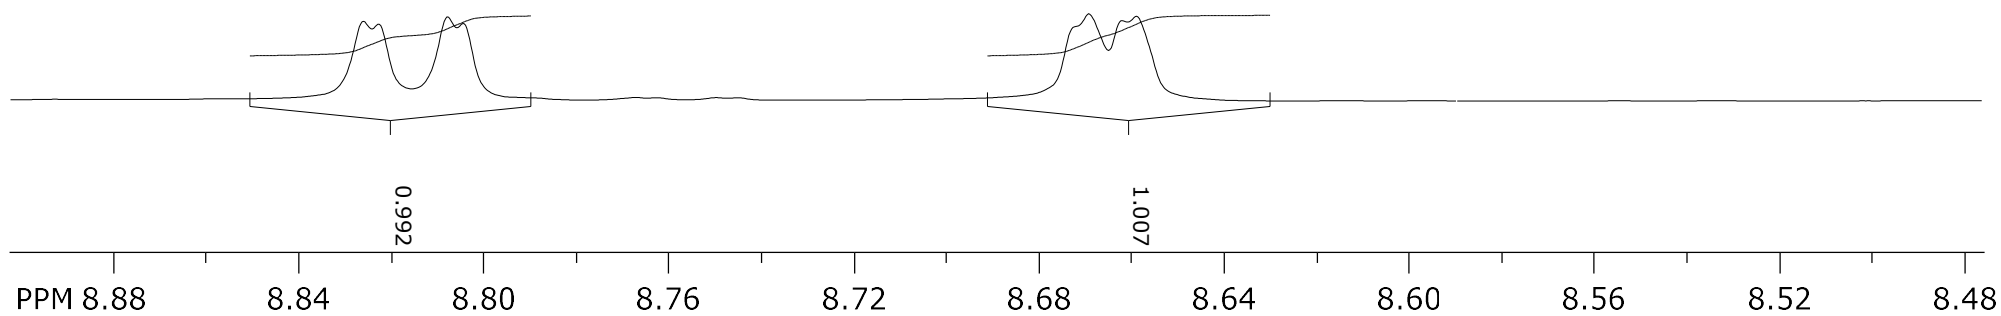



SpinWorks 4: RP 1024 B2  
PROTON CDCl3 /opt/topspin3.5pl2/nmrdata nmrsu 12

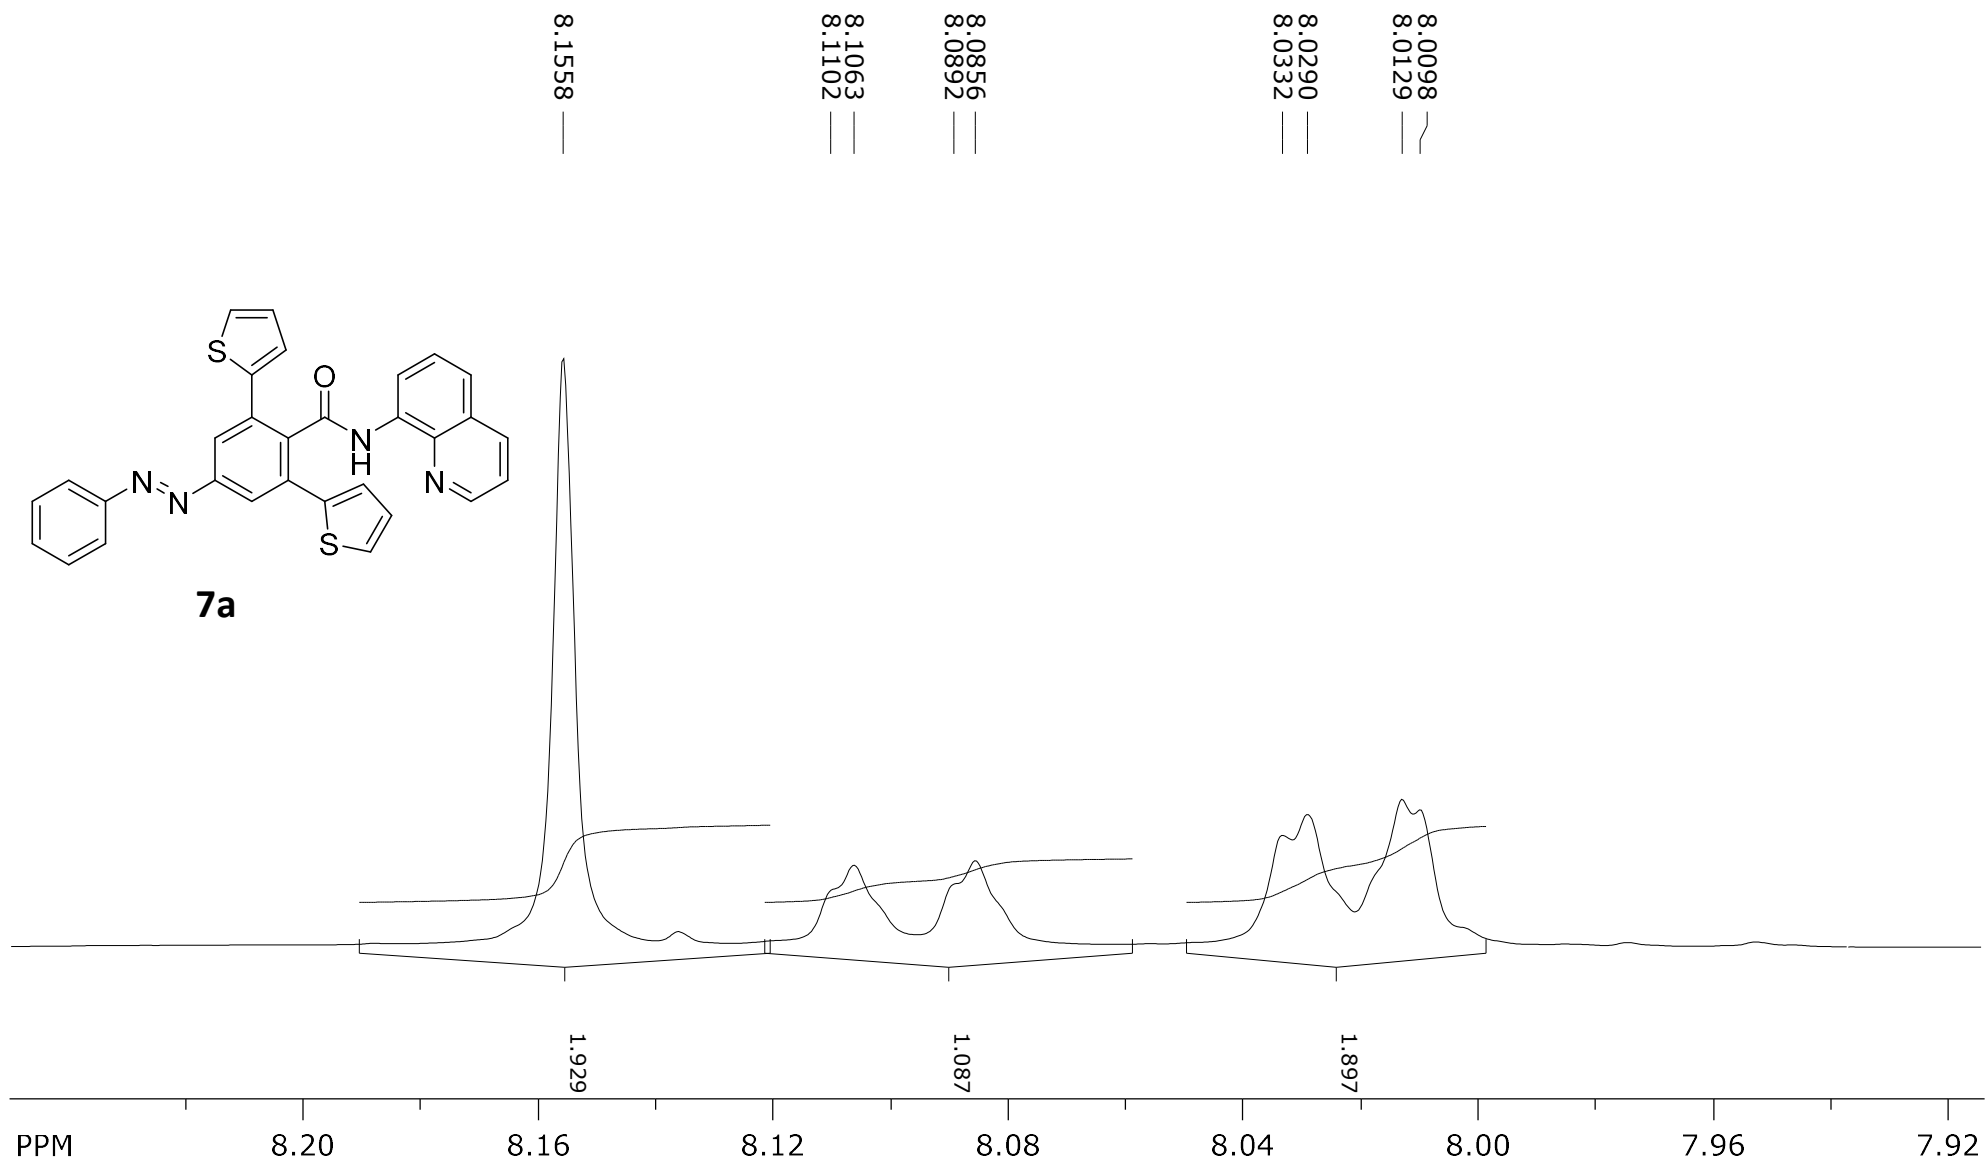

SpinWorks 4: RP 1024 B2  
PROTON CDCl3 /opt/topspin3.5pl2/nmrdata nmrsu 12

7.4992  
7.5185  
7.5340  
7.5526  
7.5669  
7.5860  
7.6077

7.4461  
7.4529

7.3603  
7.3724  
7.3825  
7.3930

7.2631  
7.2758  
7.2860

6.9493  
6.9586  
6.9620  
6.9712

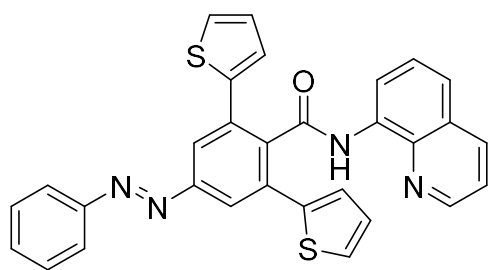

**7a**

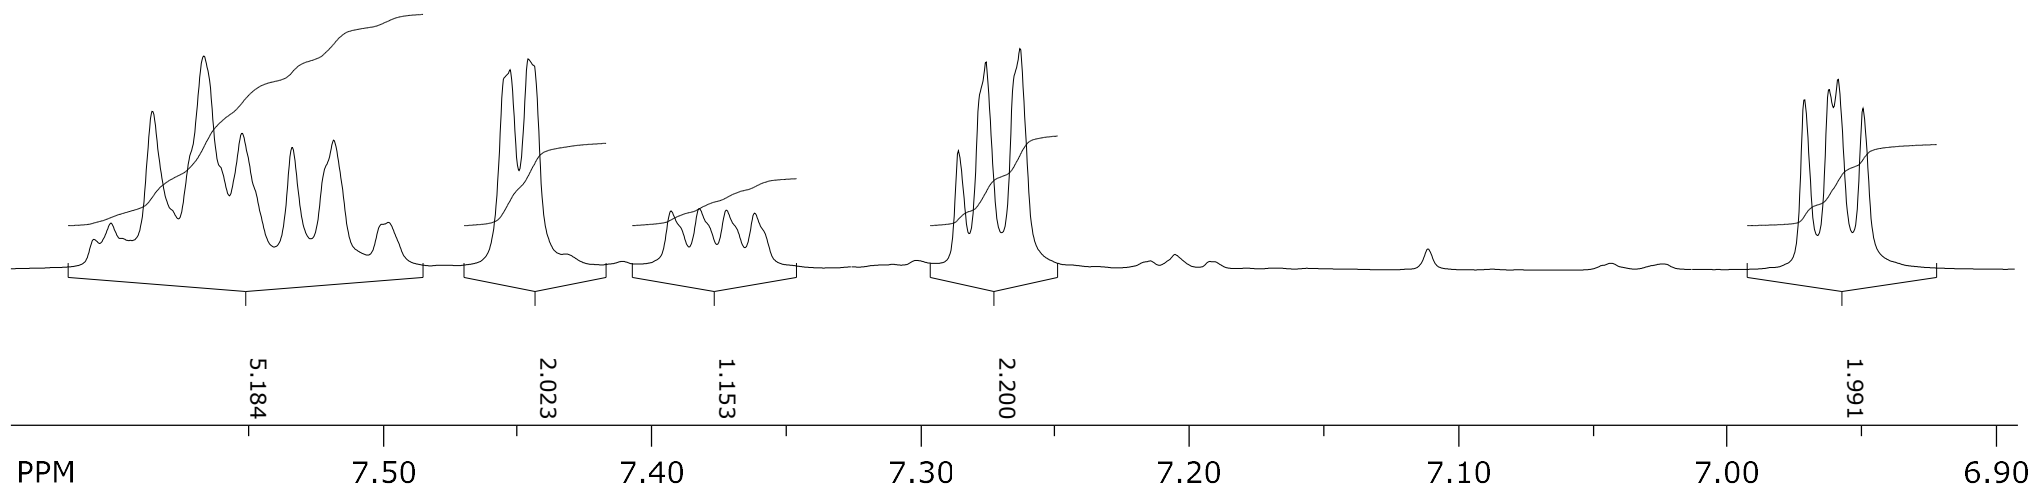

SpinWorks 4: RP 1024 B2  
C13CPD CDCl3 /opt/topspin3.5pl2/nmrdata nmrsu 12

166.840  
152.337  
152.526  
148.219  
140.335  
138.384  
137.121  
136.147  
134.262  
134.242  
131.747  
129.252  
~~127.809~~  
126.652  
124.035  
123.231  
122.107  
121.628  
116.868

76.791  
77.108  
77.426

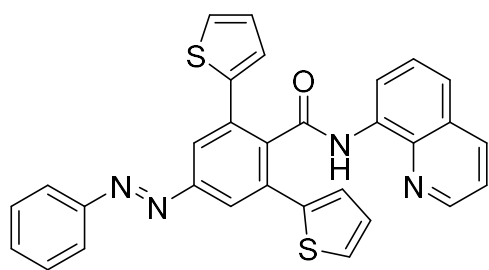

7a

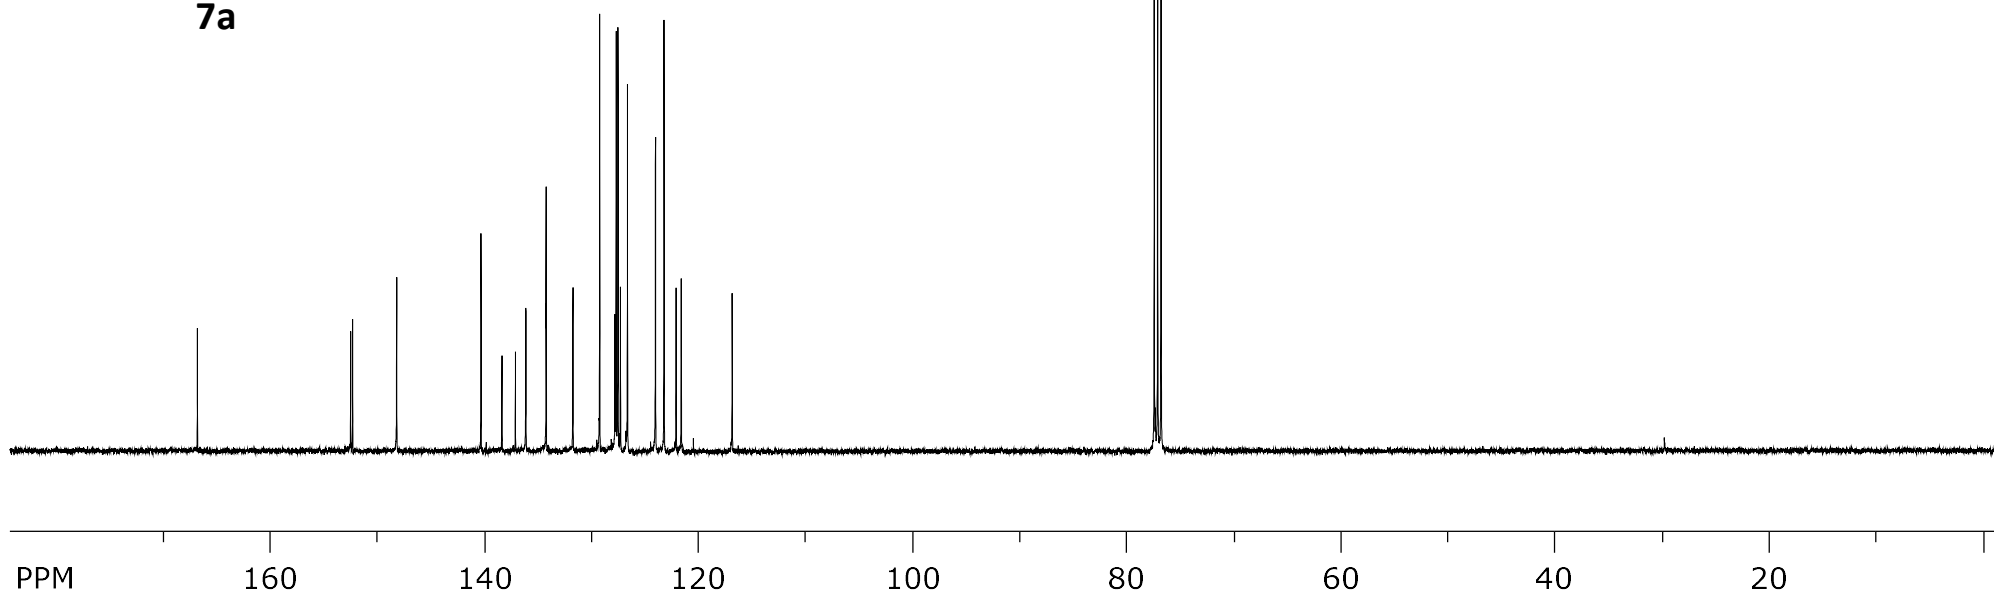

SpinWorks 4: RP 1024 B2  
C13CPD CDCl3 /opt/topspin3.5pl2/nmrdata nmrsu 12

140.335 —  
138.384 —  
137.121 —  
136.147 —  
134.242 —  
134.262 —  
131.747 —  
129.252 —  
127.822 —  
127.707 —  
127.537 —  
127.309 —  
126.652 —  
124.035 —  
123.231 —  
122.107 —  
121.628 —  
116.868 —

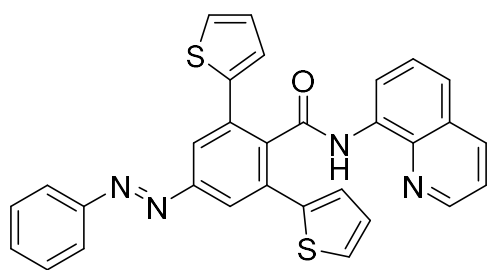

**7a**

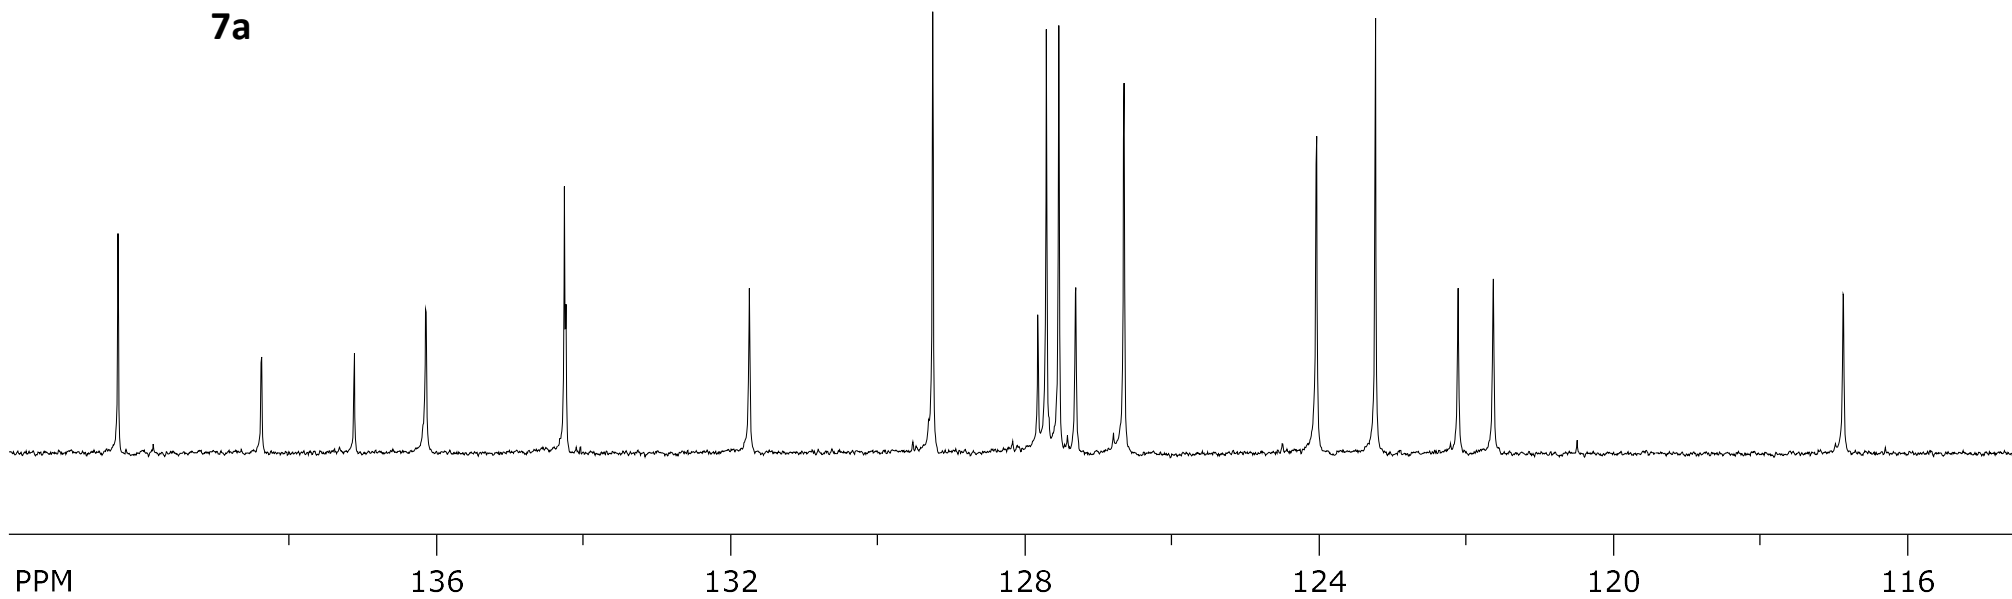

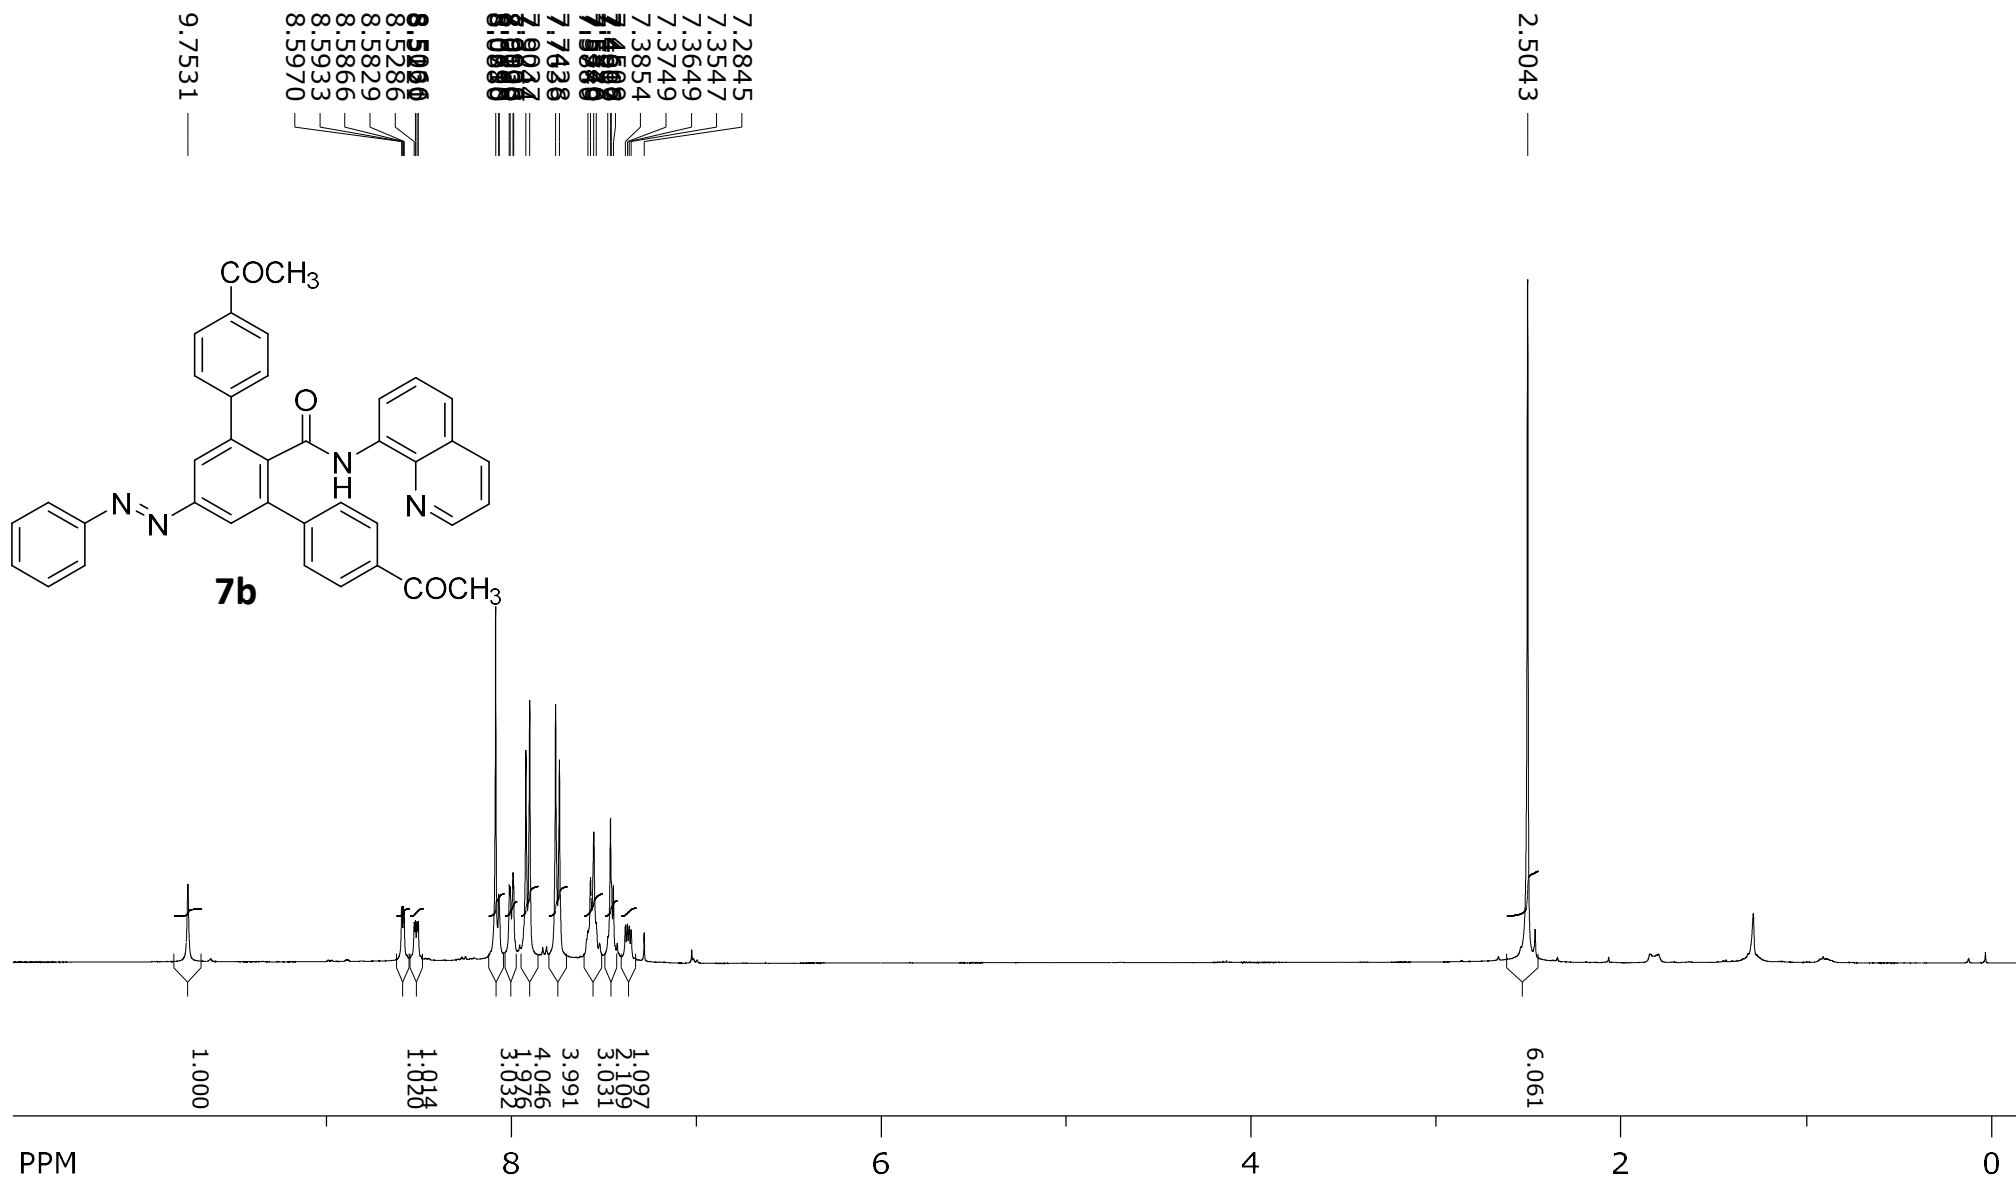

SpinWorks 4: RP 1172 B2

8.5829  
8.5866  
8.5933  
8.5970

8.5066  
8.5130  
8.5221  
8.5286

8.0690  
8.0718  
8.0880

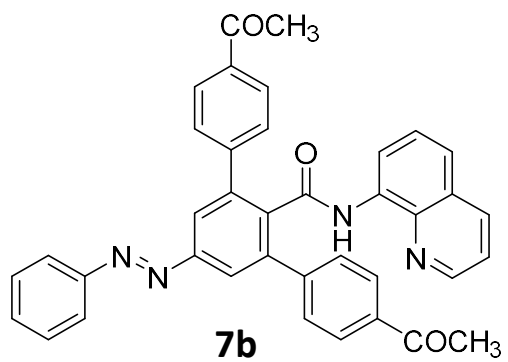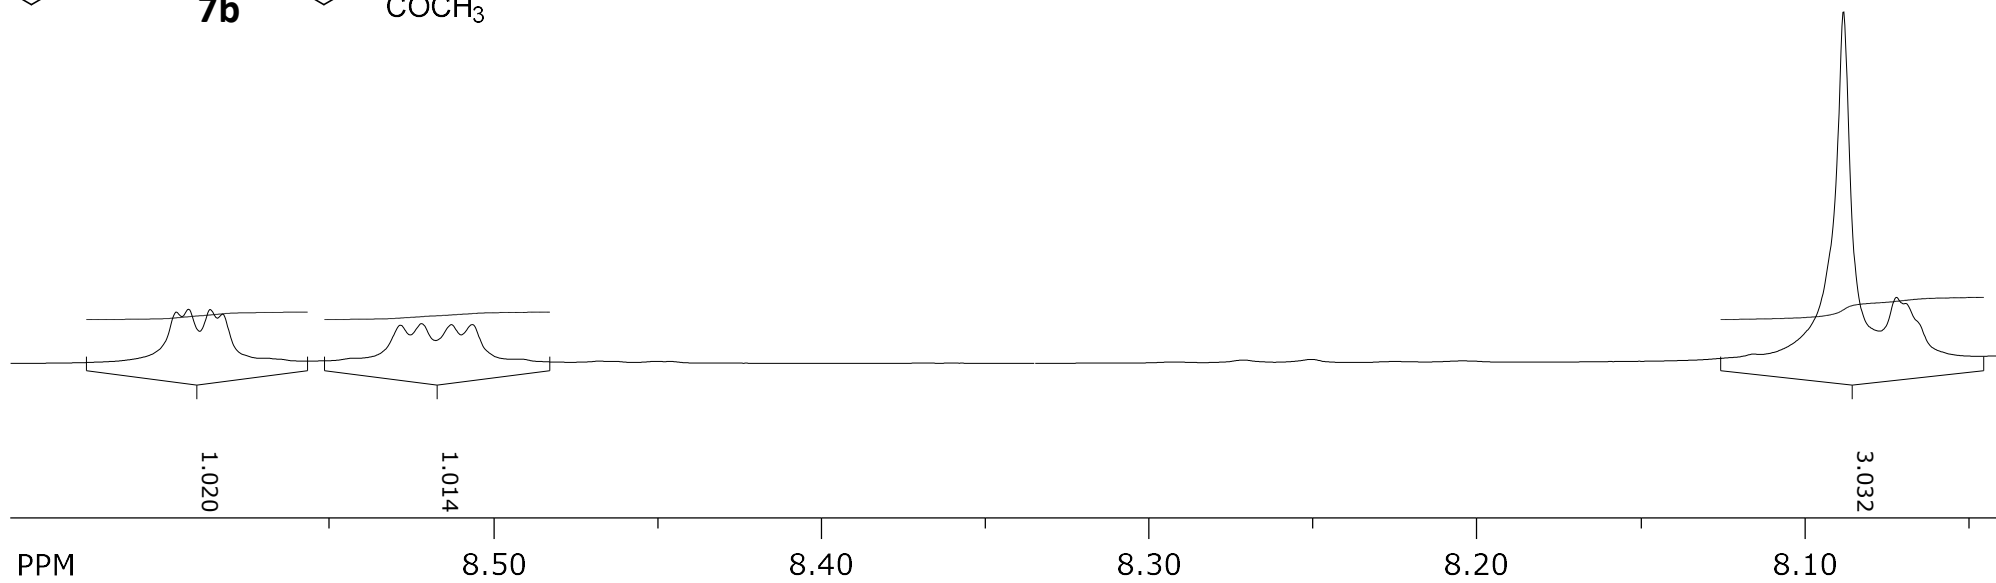

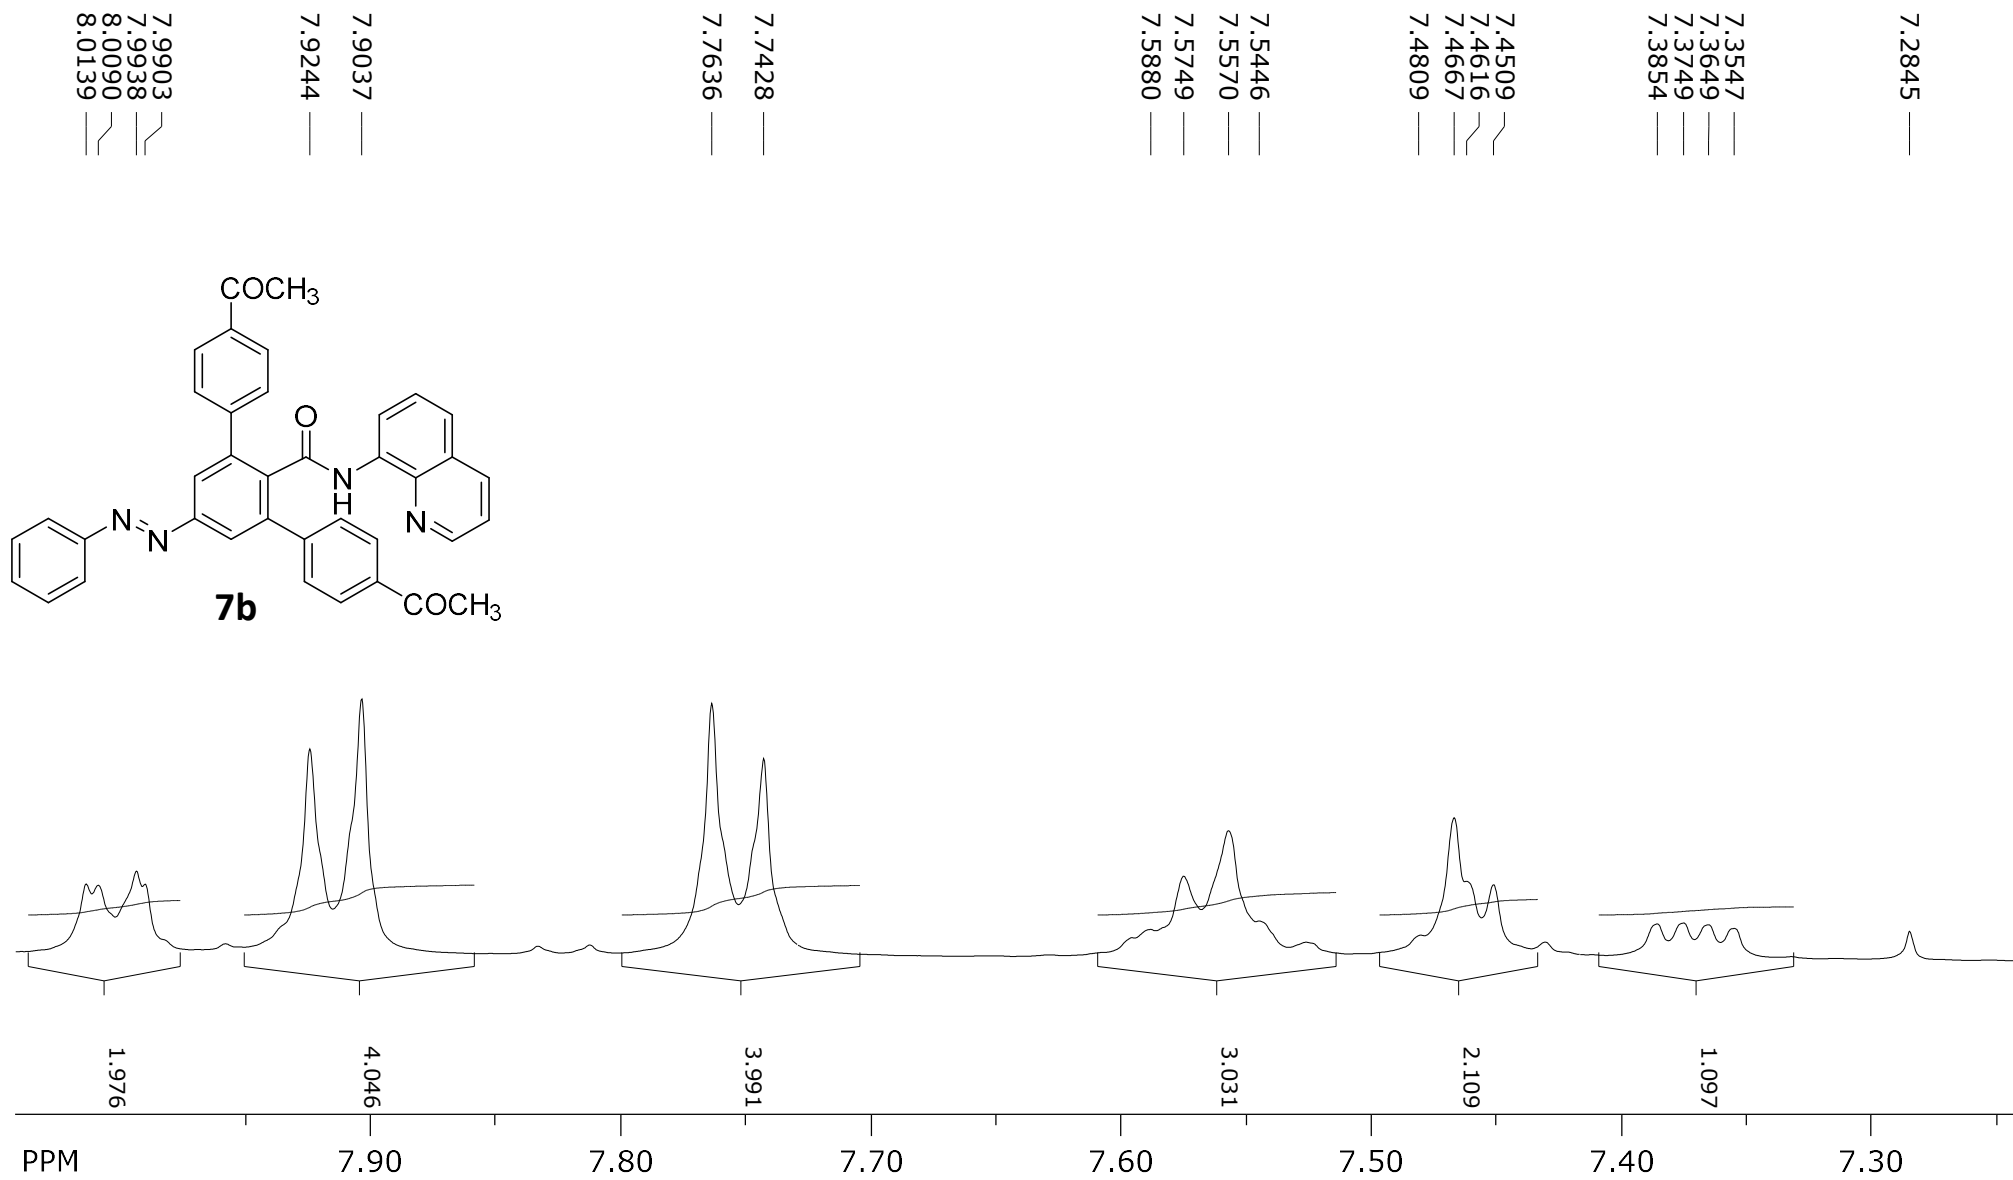

SpinWorks 4: RP 547 B2  
C13CPD256 CDCl3 /opt/topspin3.5pl2/nmrdata nmrsu 49

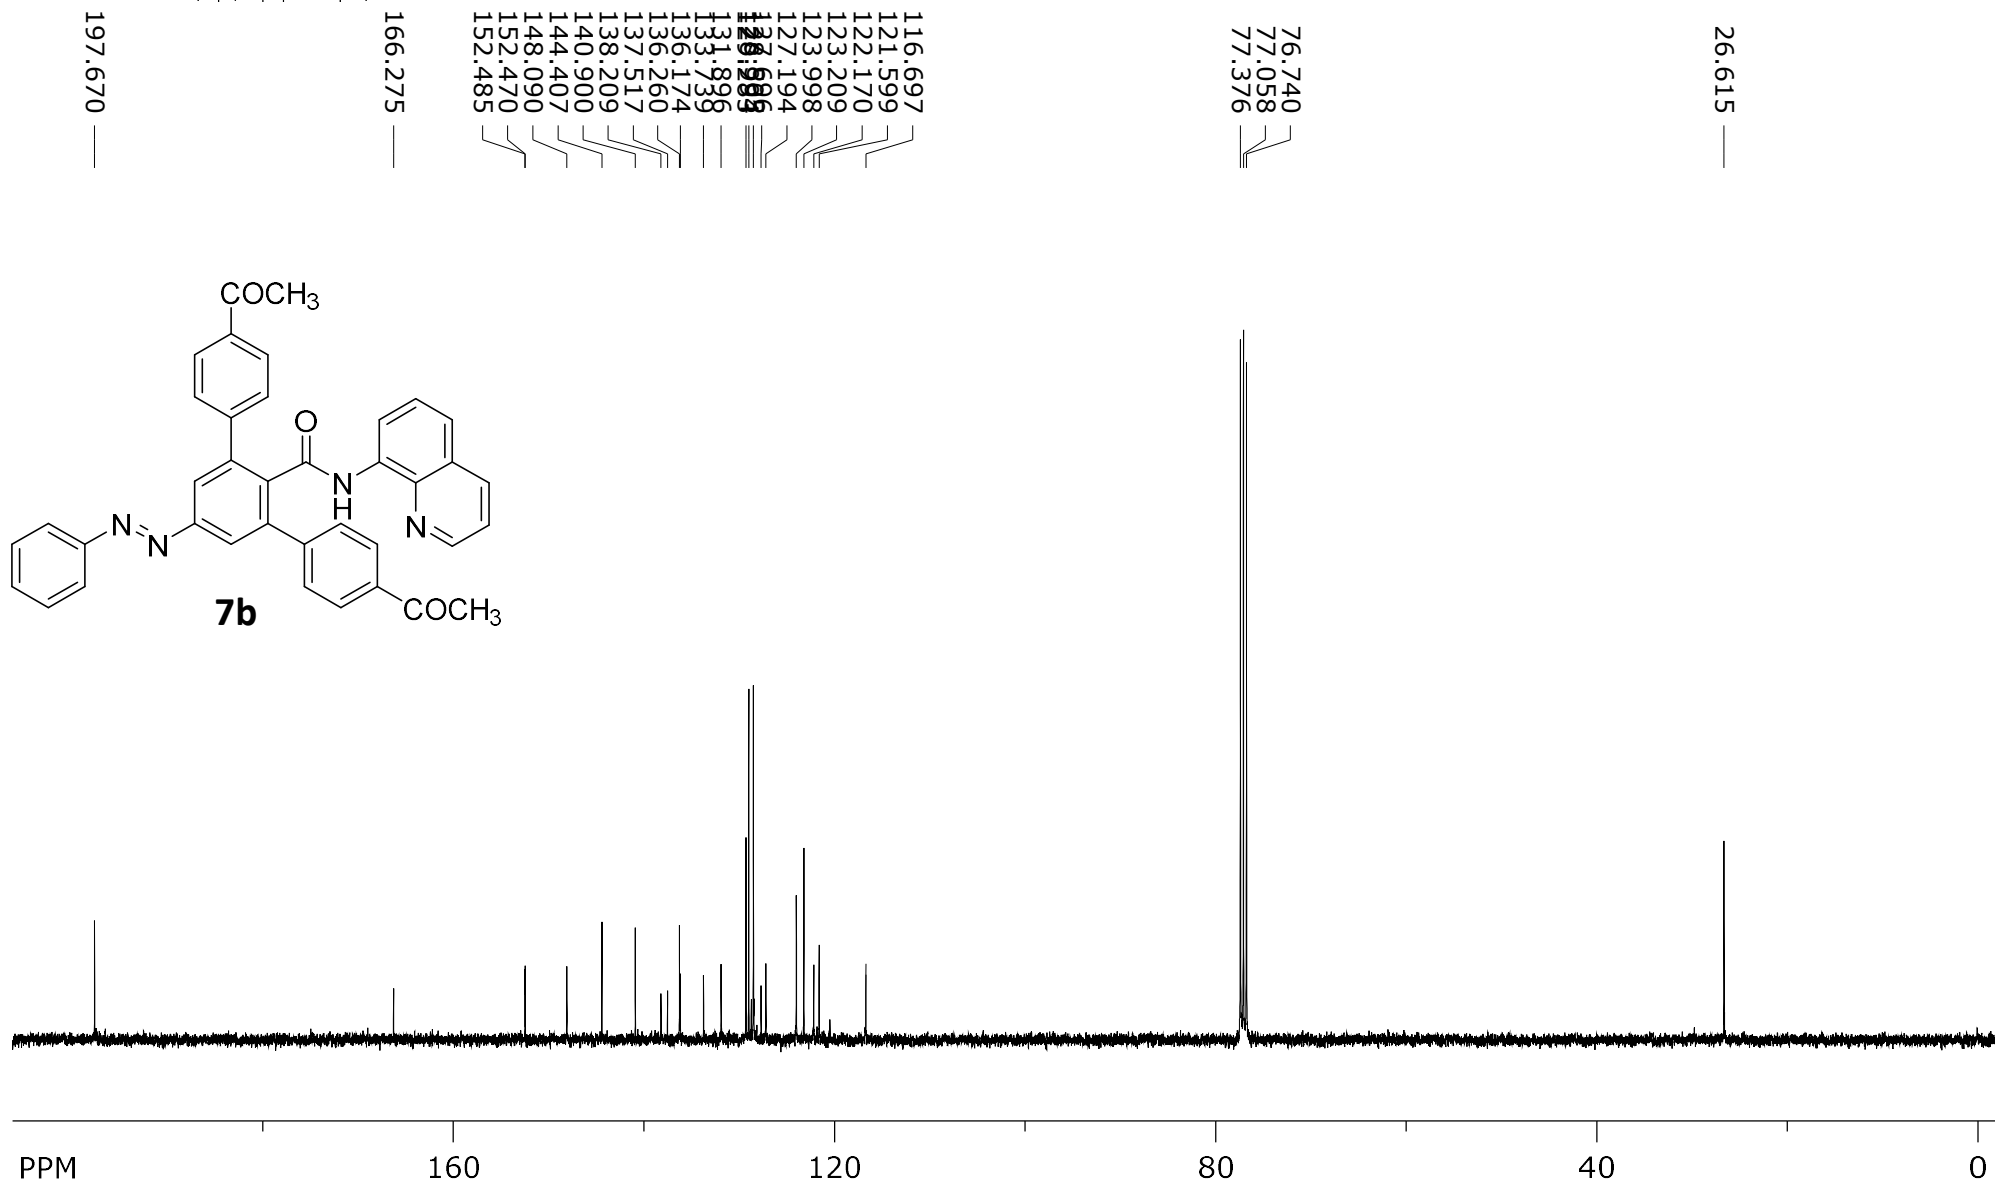



SpinWorks 4: RP 547 B2  
C13CPD256 CDCl3 /opt/topspin3.5pl2/nmrdata nmrsu 49

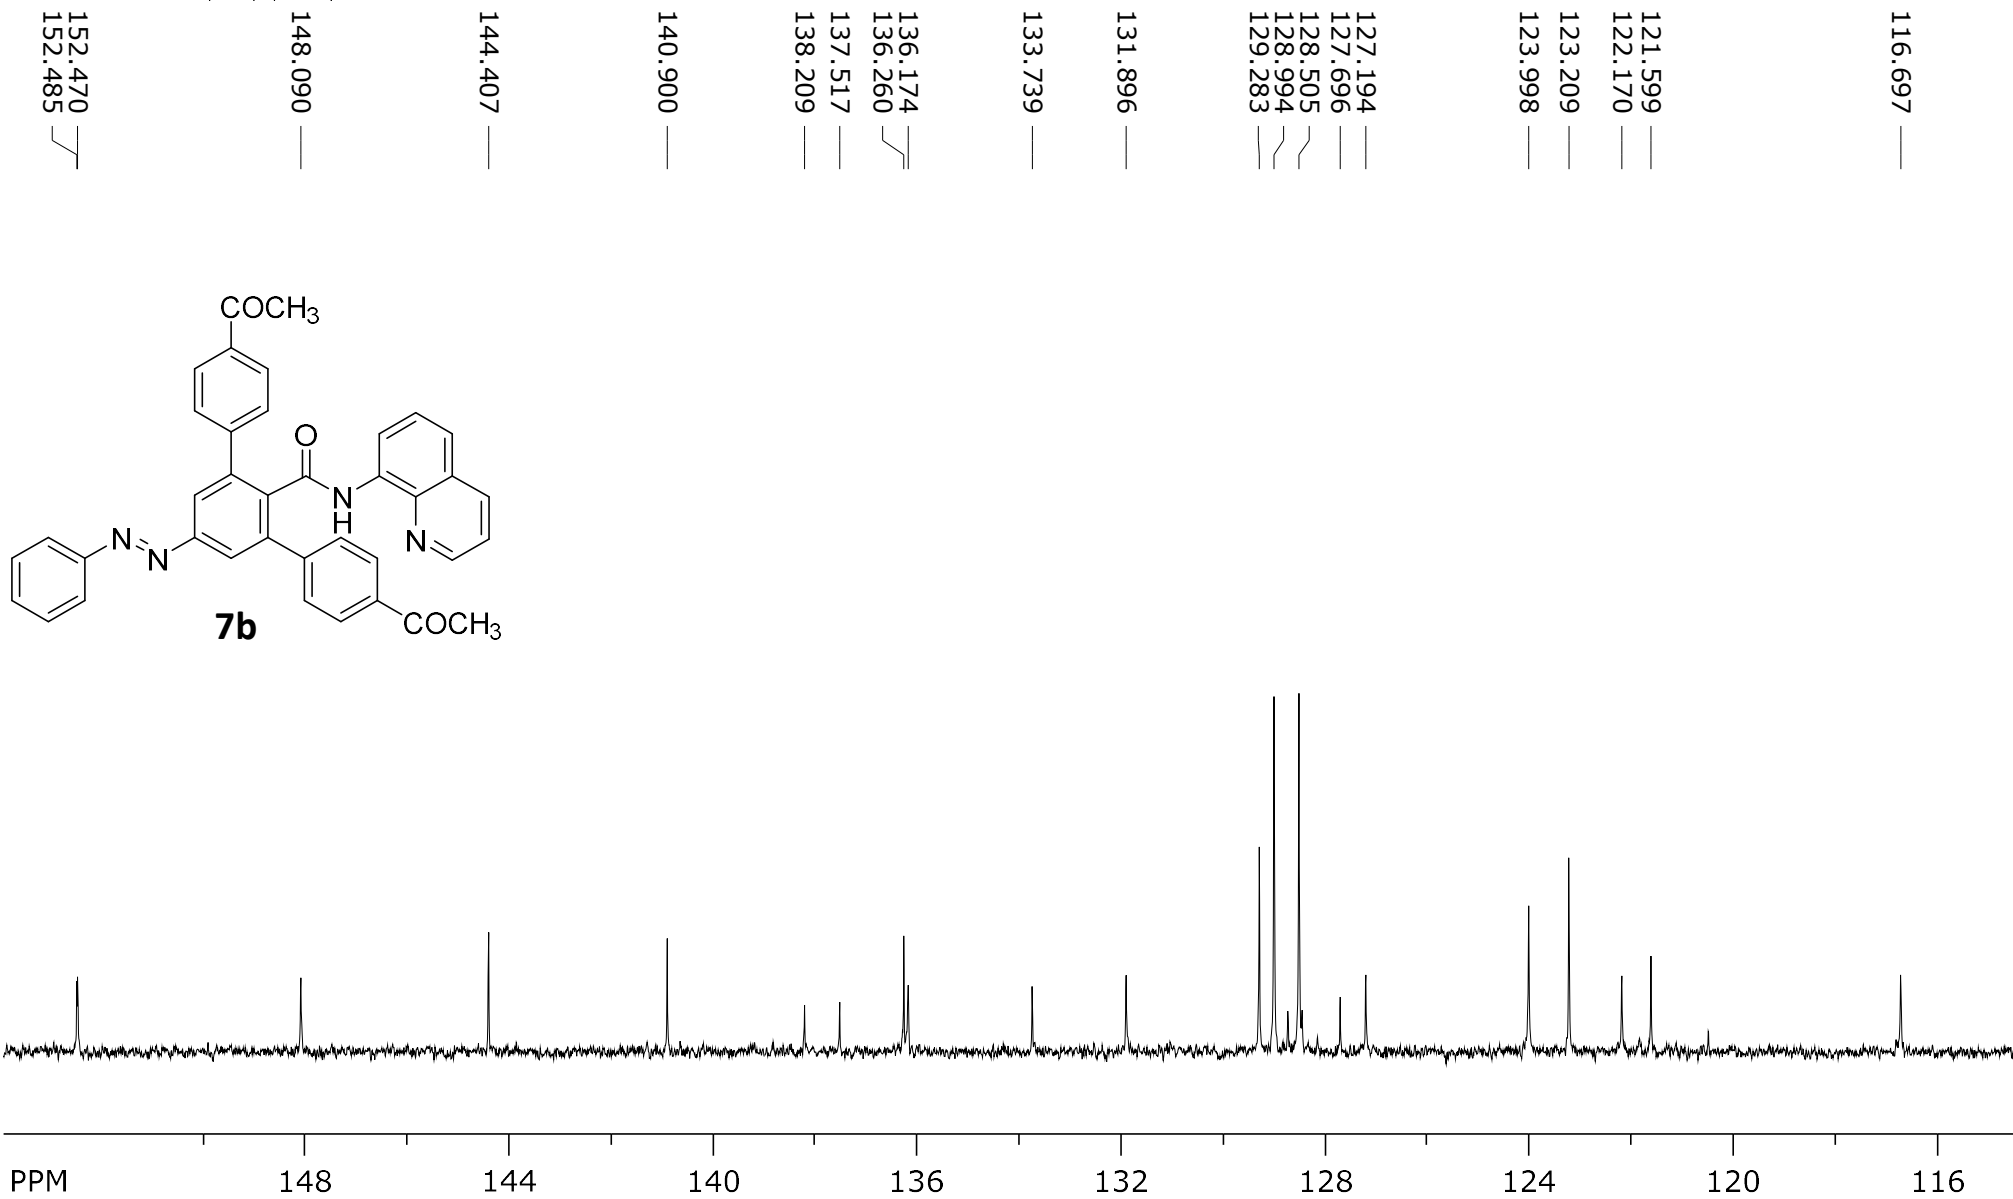

SpinWorks 4: RP 1177 REP B2 1  
PROTON CDCl3 /opt/topspin3.5pl2/nmrdata nmrsu 6

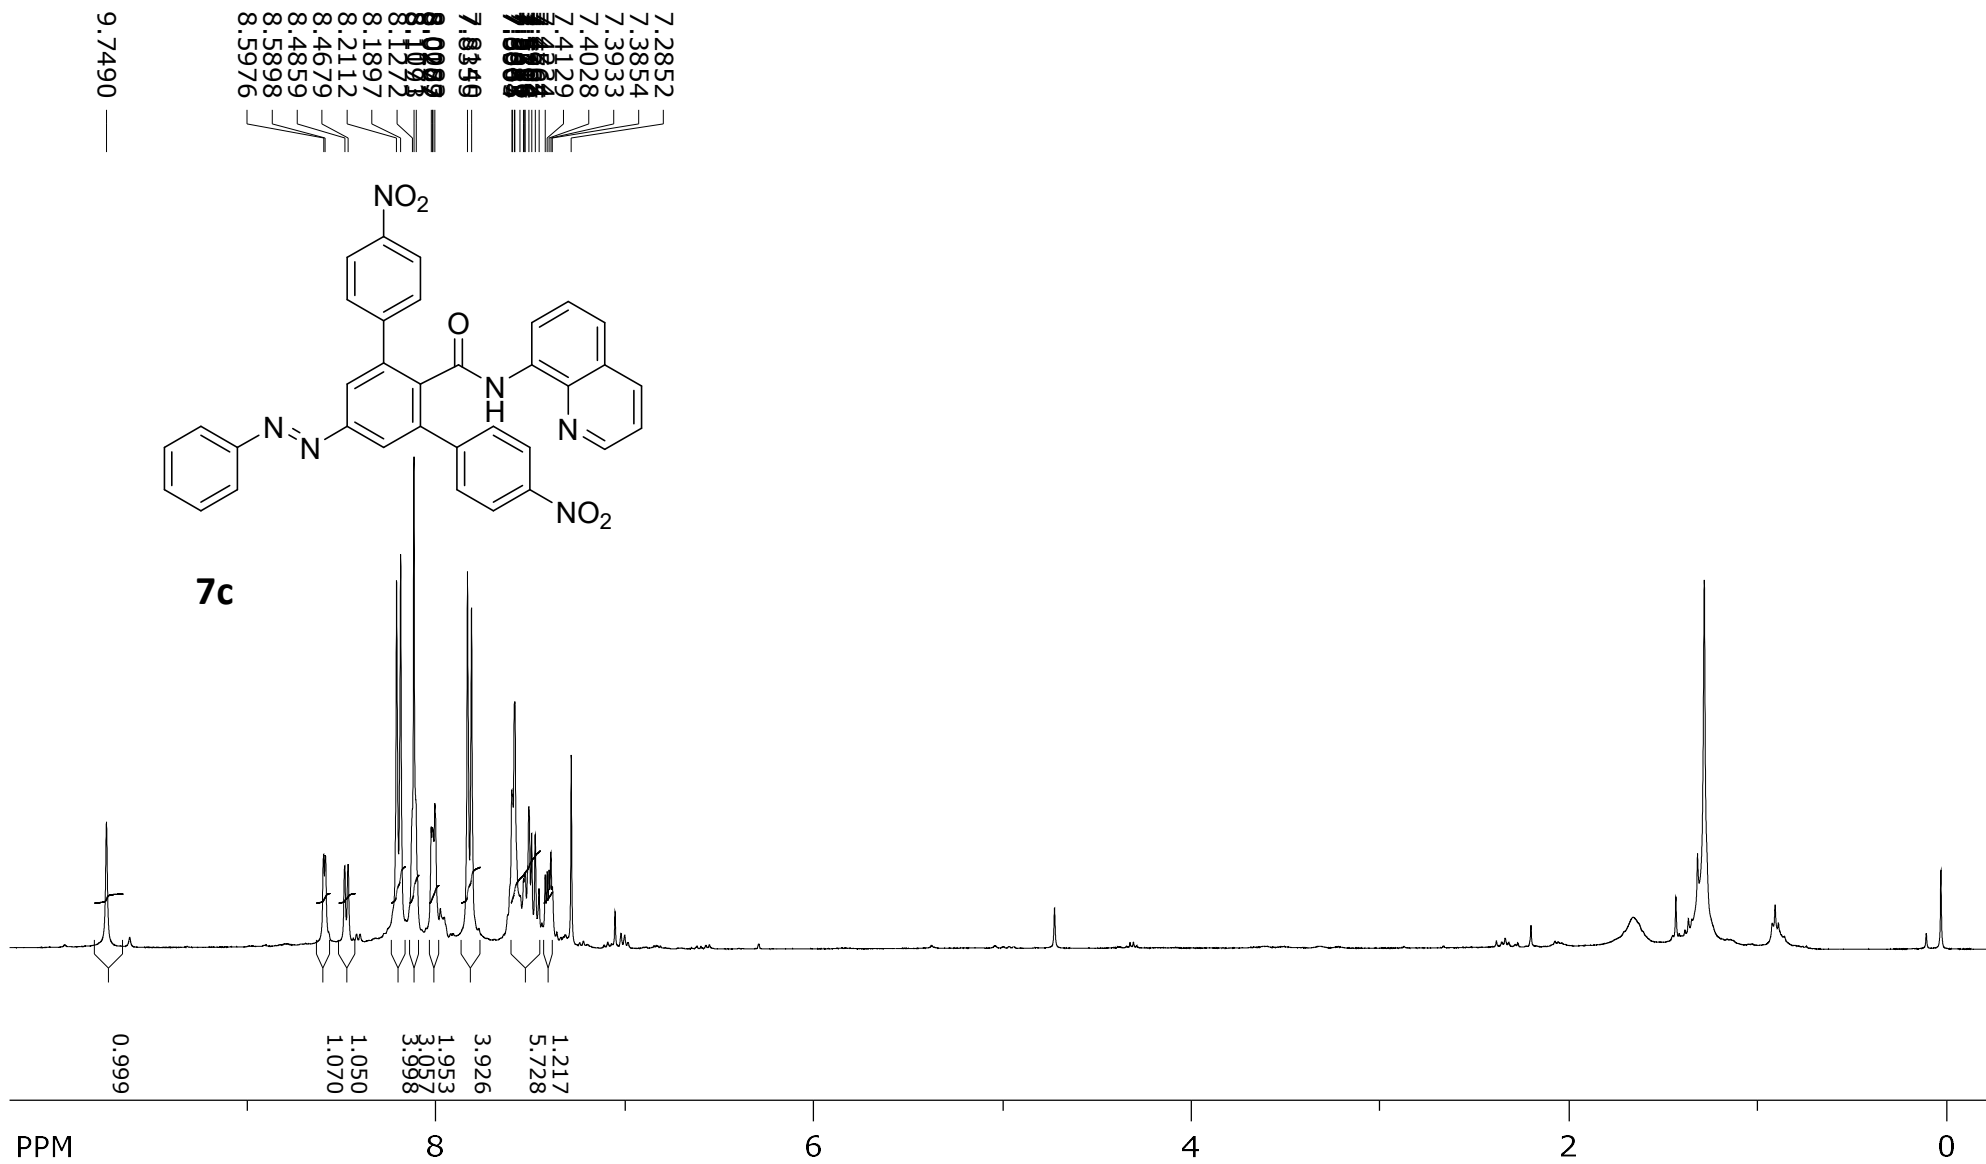

SpinWorks 4: RP 1177 REP B2 1  
PROTON CDCl3 /opt/topspin3.5pl2/nmrdata nmrsu 6

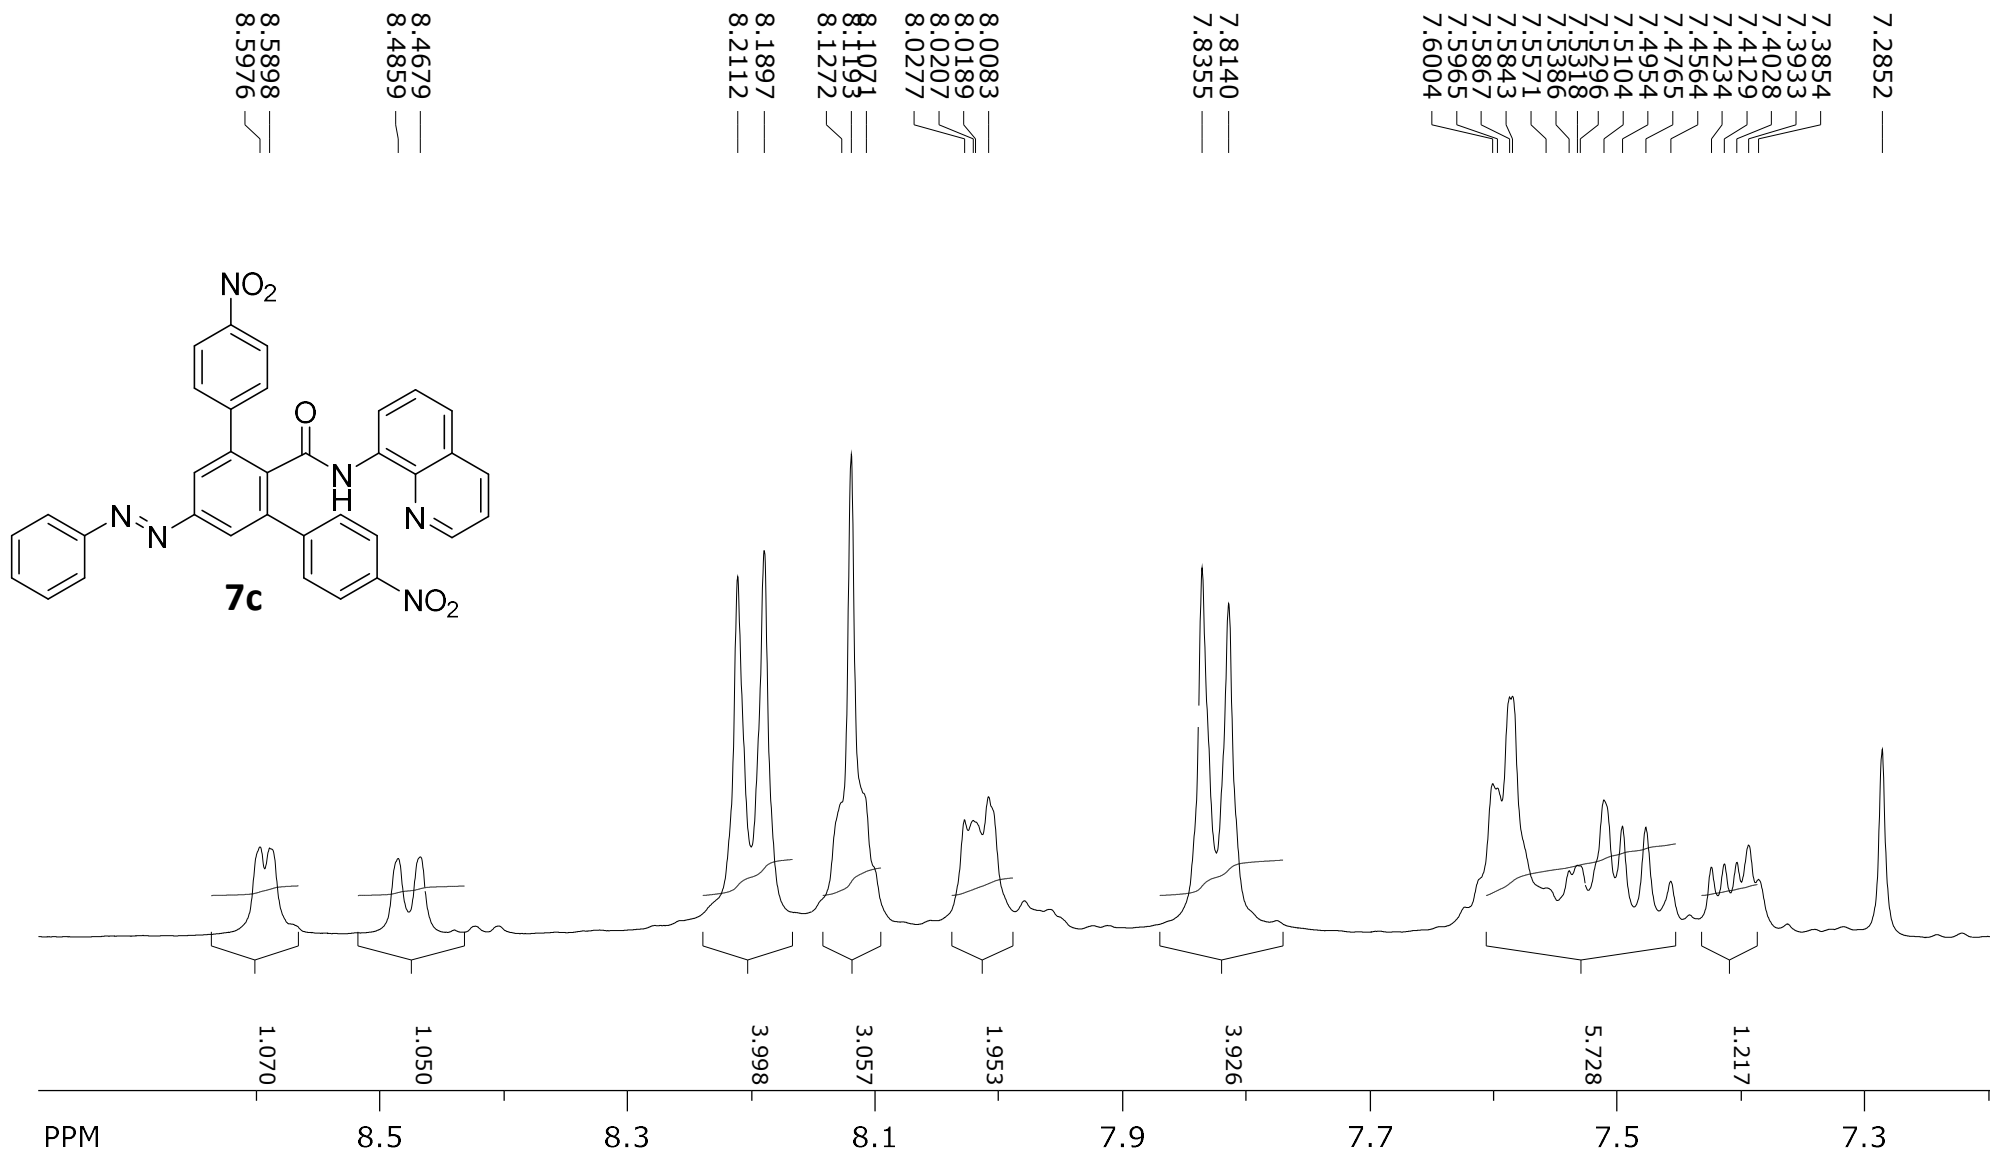

SpinWorks 4: RP 1177 B2  
C13CPD CDCI3 /opt/topspin3.5pl2/nmrdata nmrsu 9

165.578  
152.571  
152.383  
148.211  
147.532  
146.005  
139.933  
138.137  
137.408  
136.441  
133.312  
132.219  
129.994  
129.994  
129.994  
124.376  
123.736  
123.310  
122.732  
121.812  
116.864

76.780  
77.098  
77.416

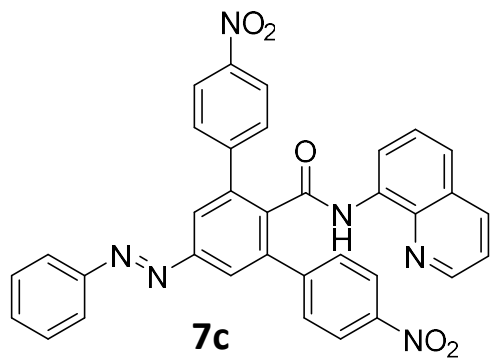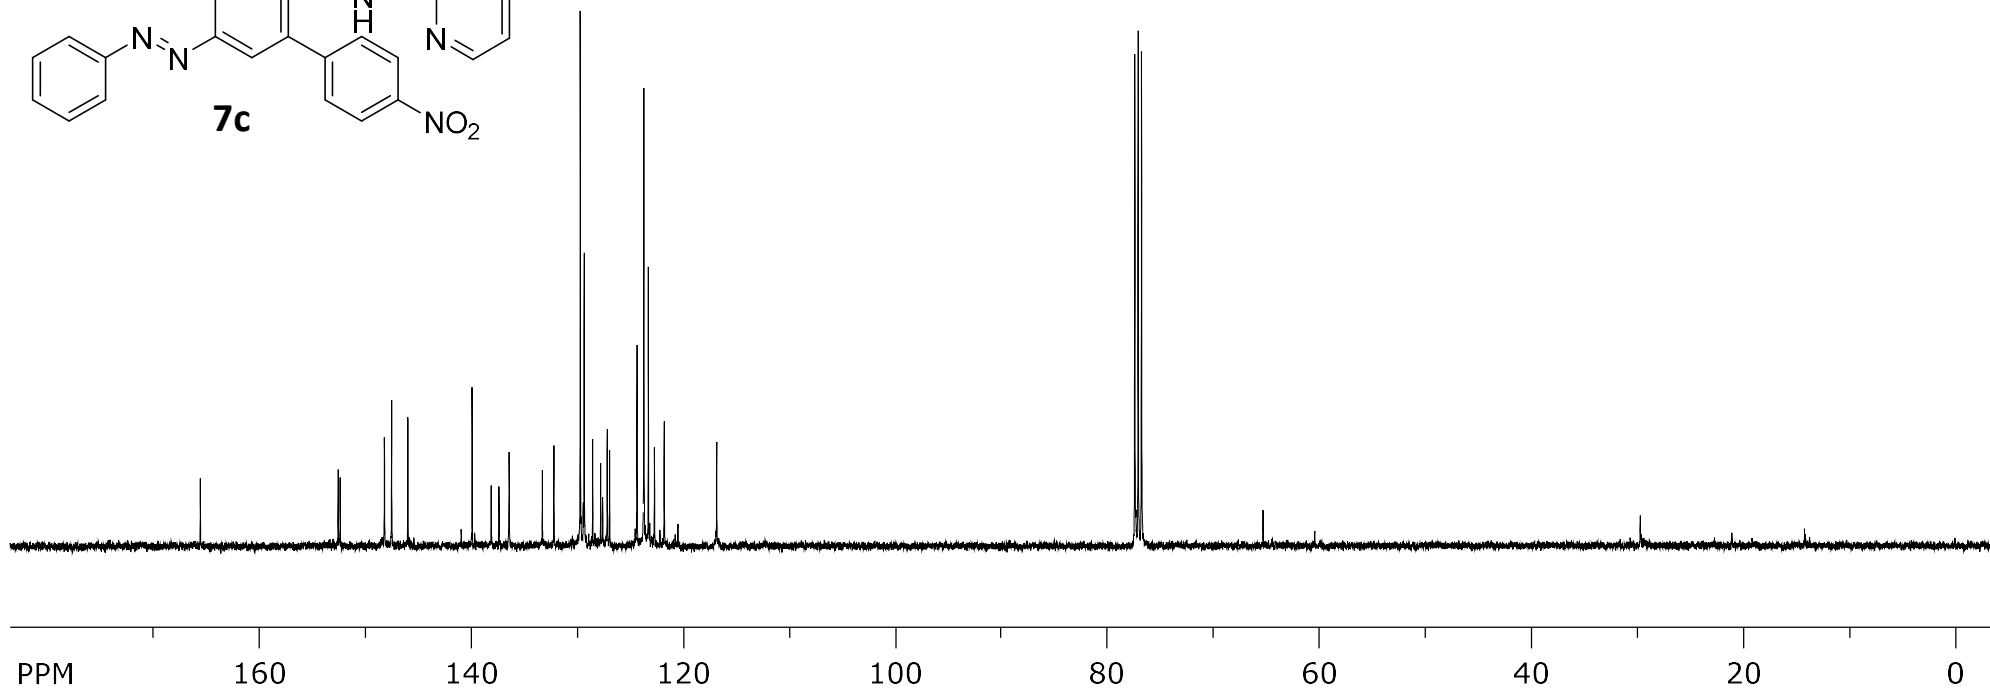

SpinWorks 4: RP 1177 B2  
C13CPD CDCl3 /opt/topspin3.5pl2/nmrdata nmrsu 9

152.383 —  
152.571 —  
148.211 —  
147.532 —  
146.005 —  
139.933 —  
138.137 —  
137.408 —  
136.441 —  
133.312 —  
132.219 —  
129.734 —  
129.363 —  
128.561 —  
127.811 —  
127.190 —  
126.967 —  
124.376 —  
123.736 —  
122.732 —  
121.812 —  
116.864 —

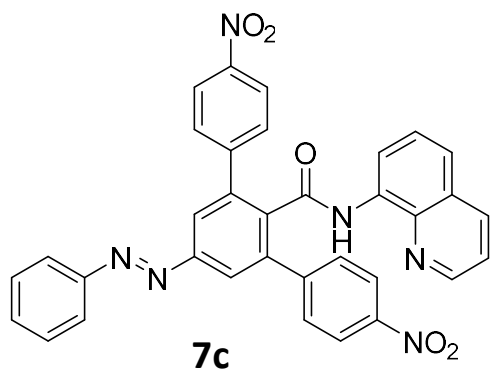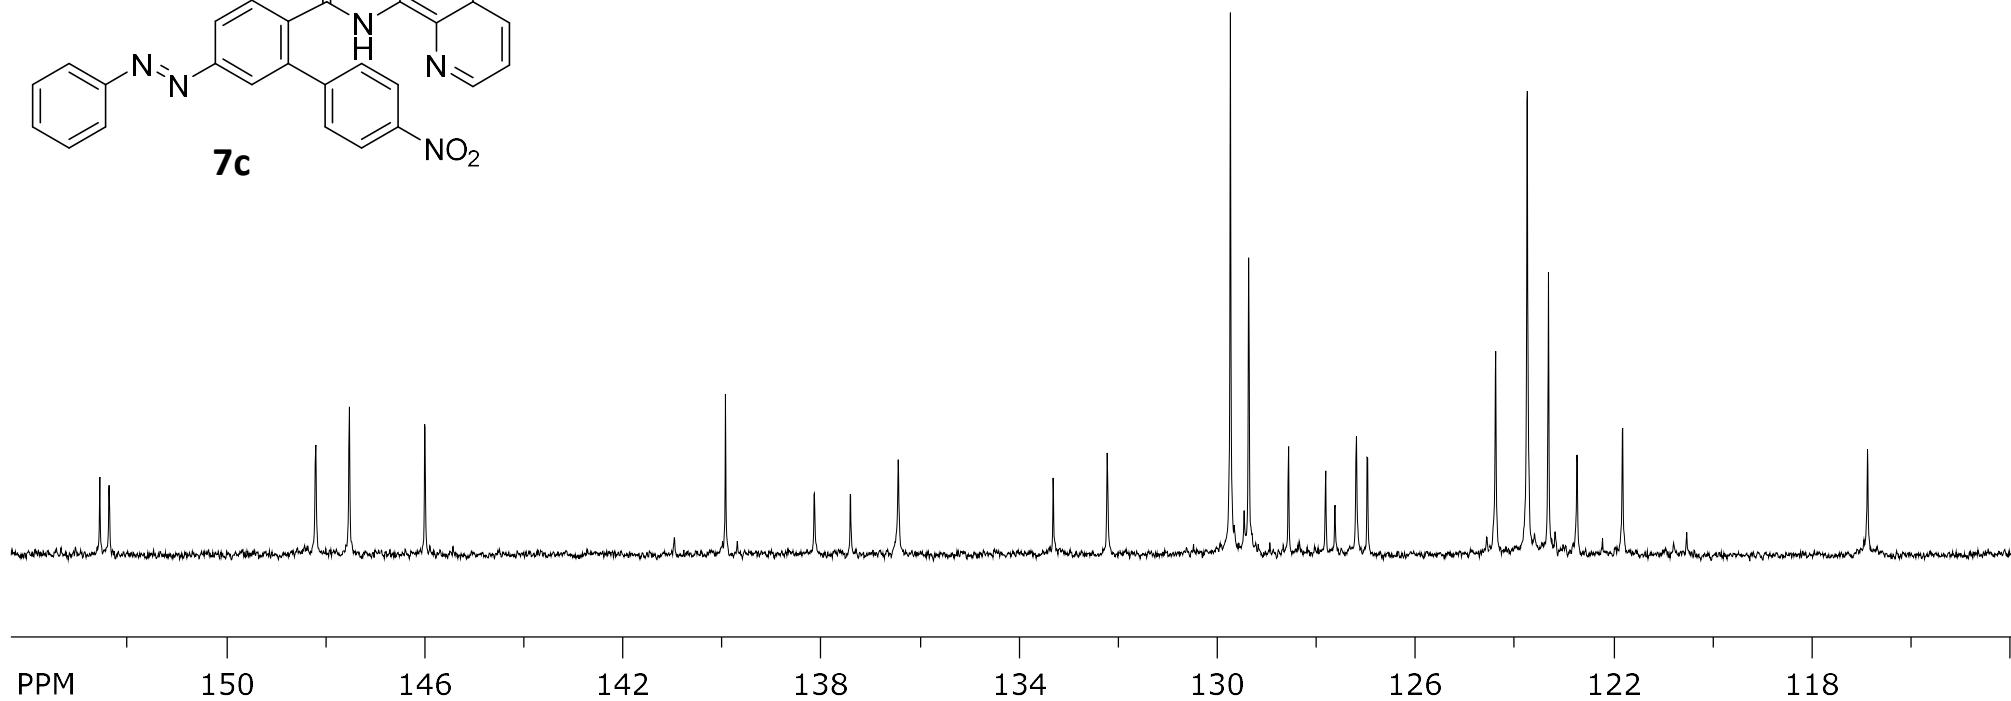

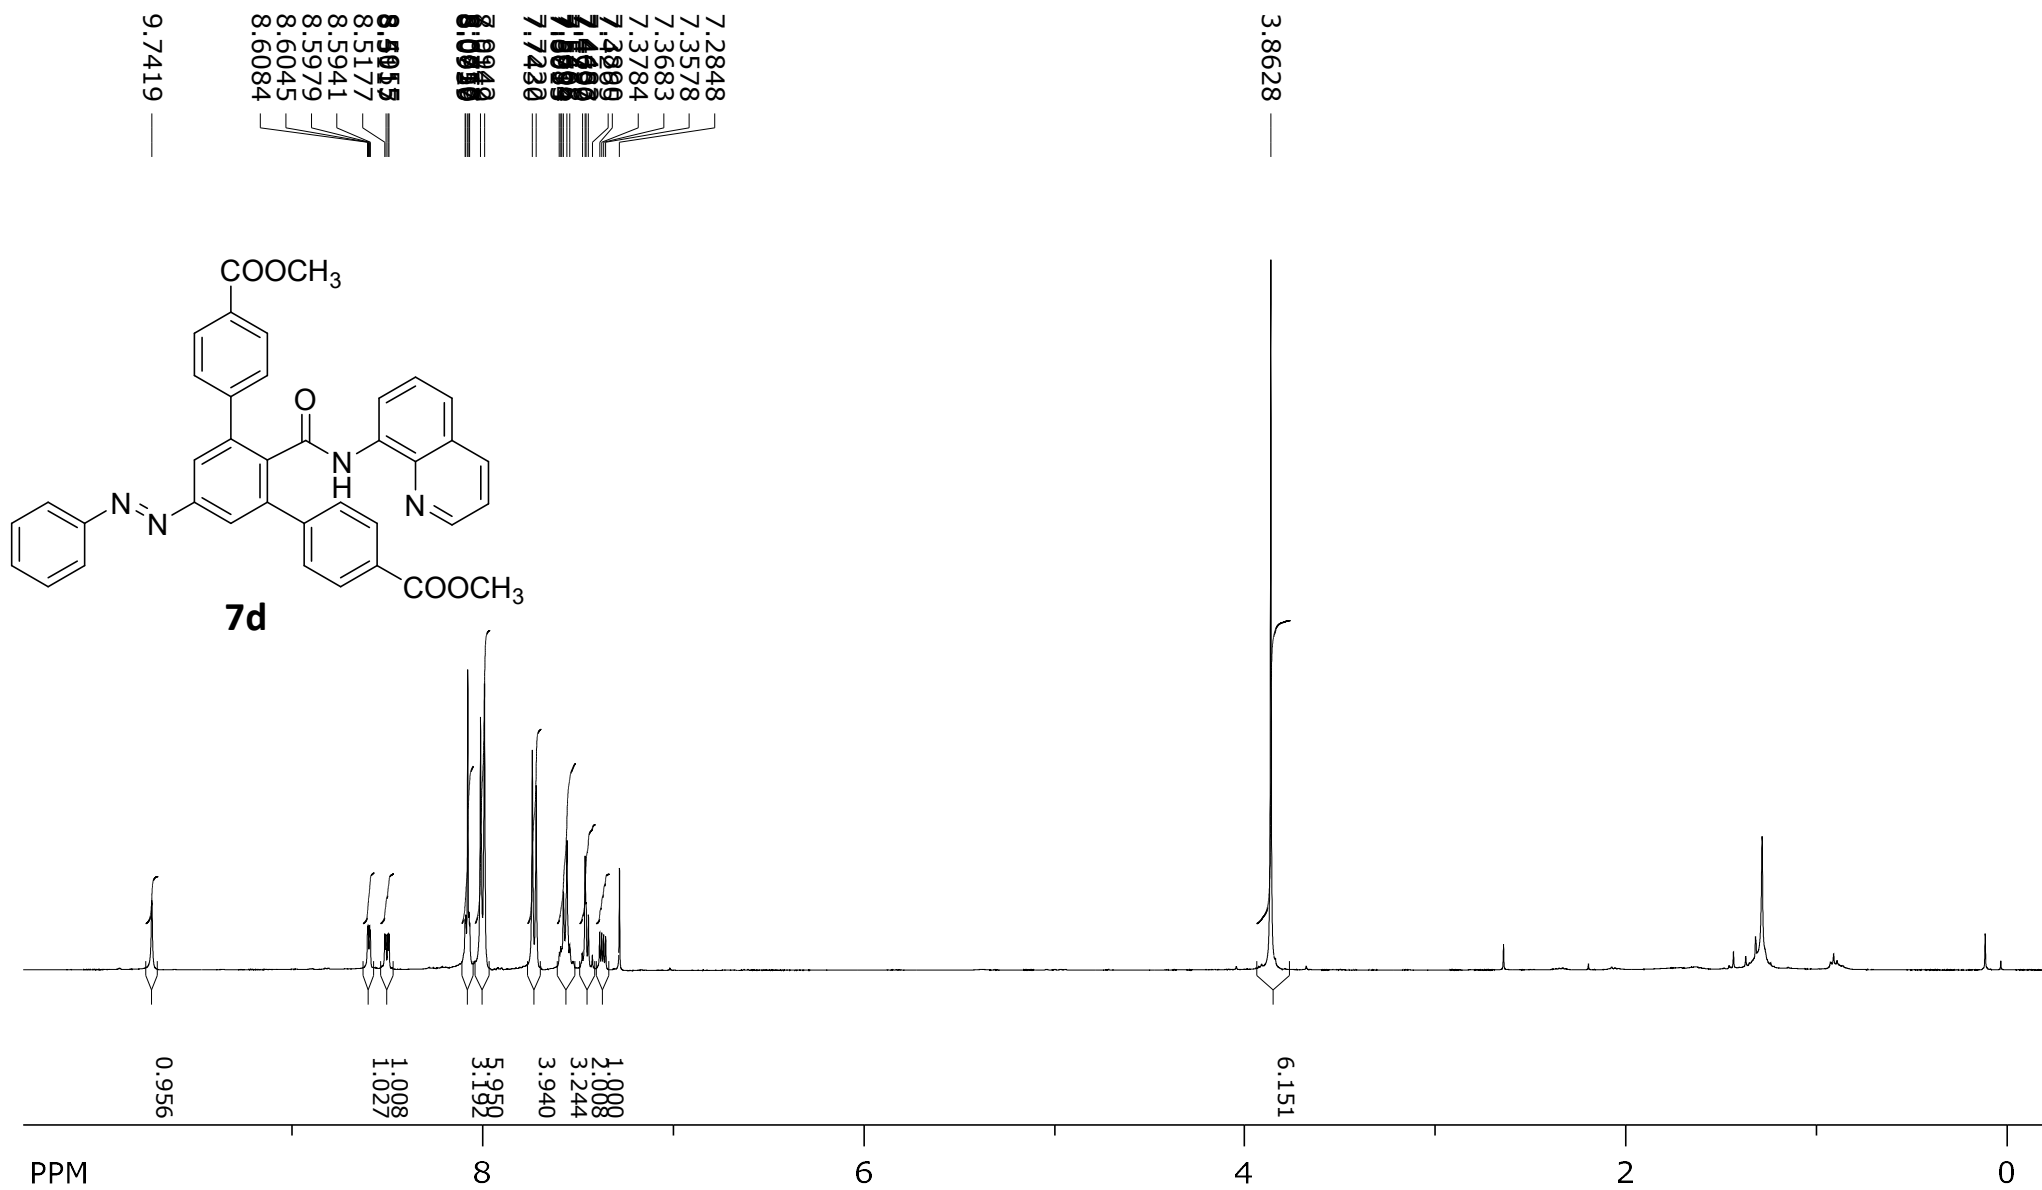

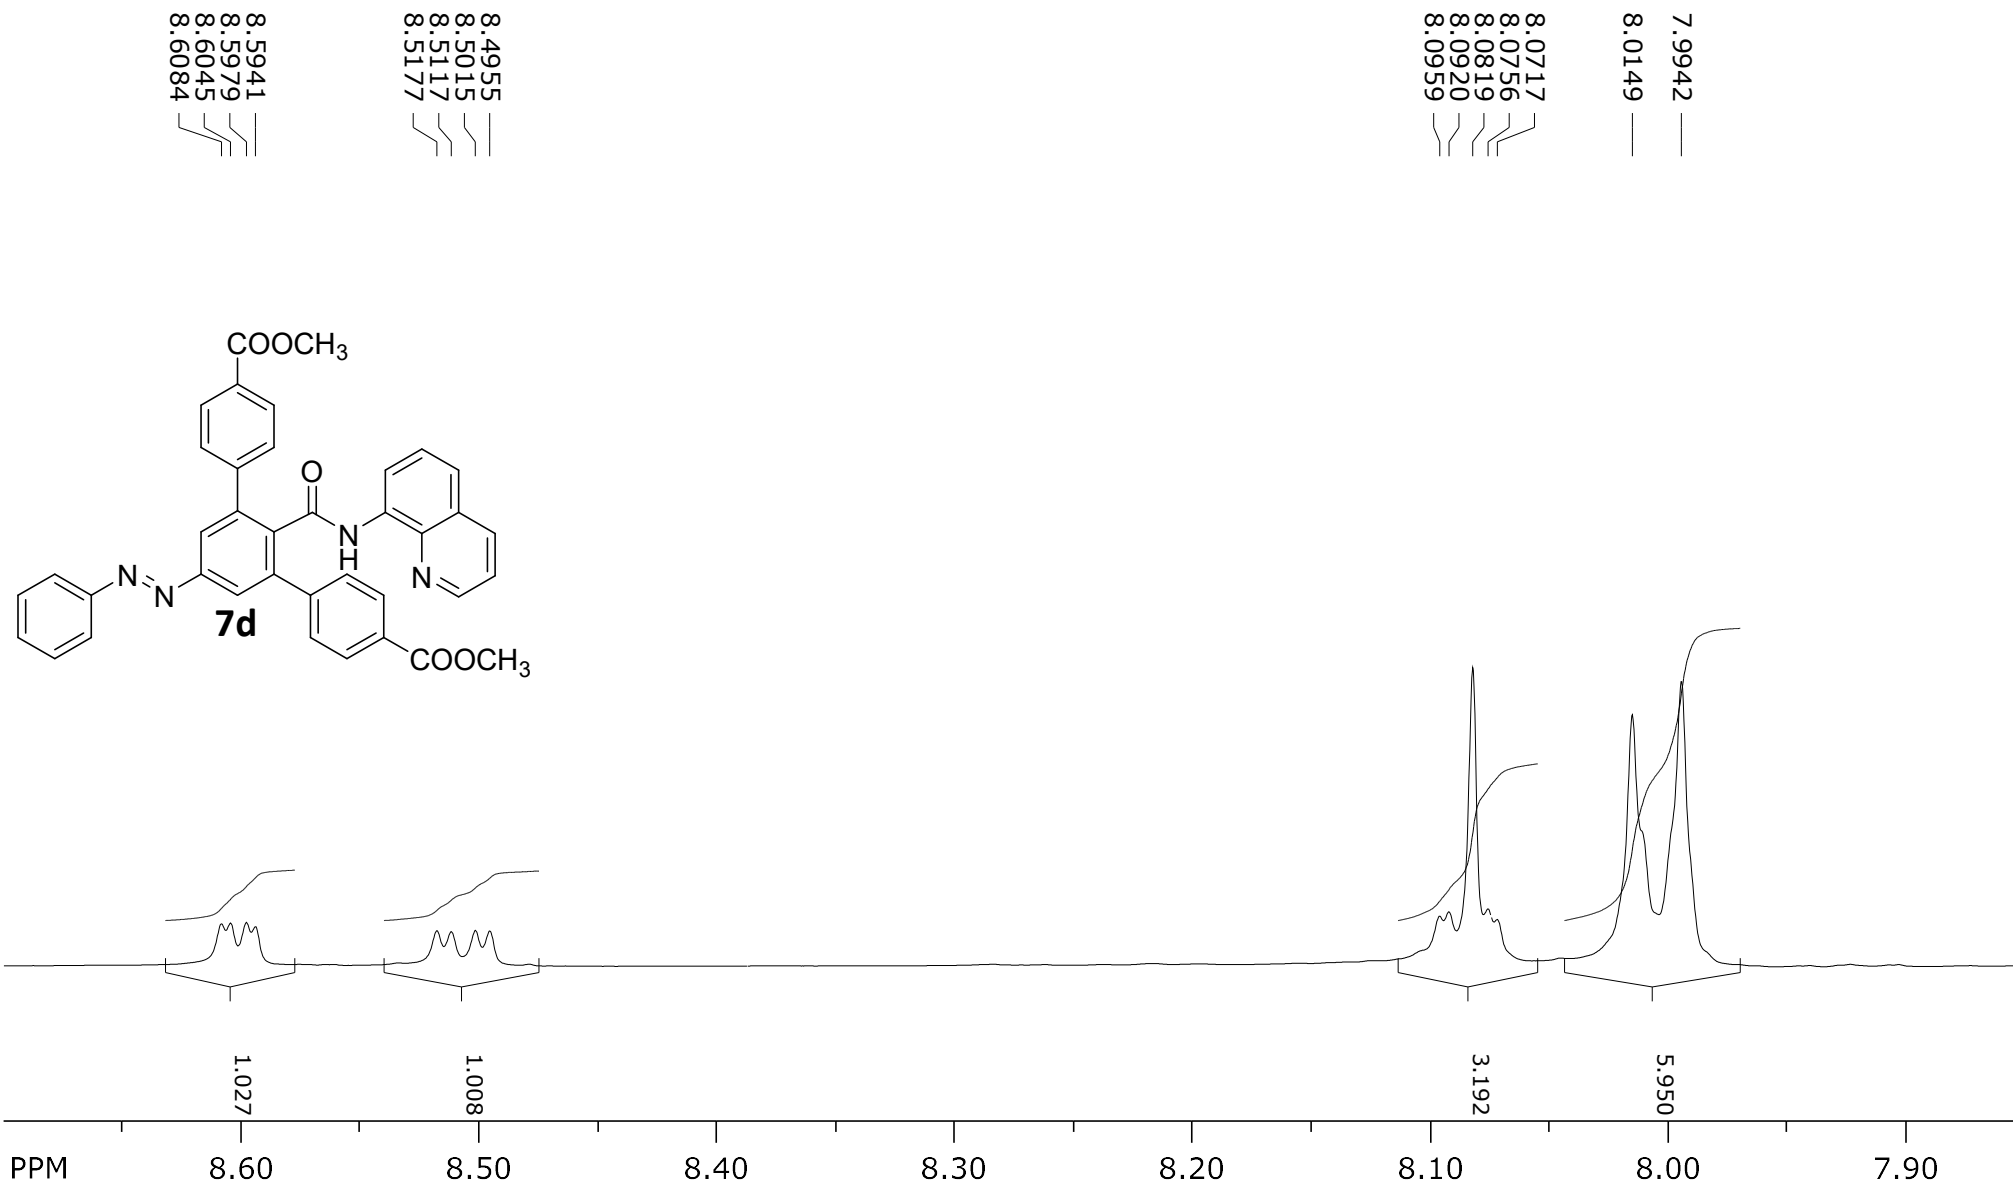

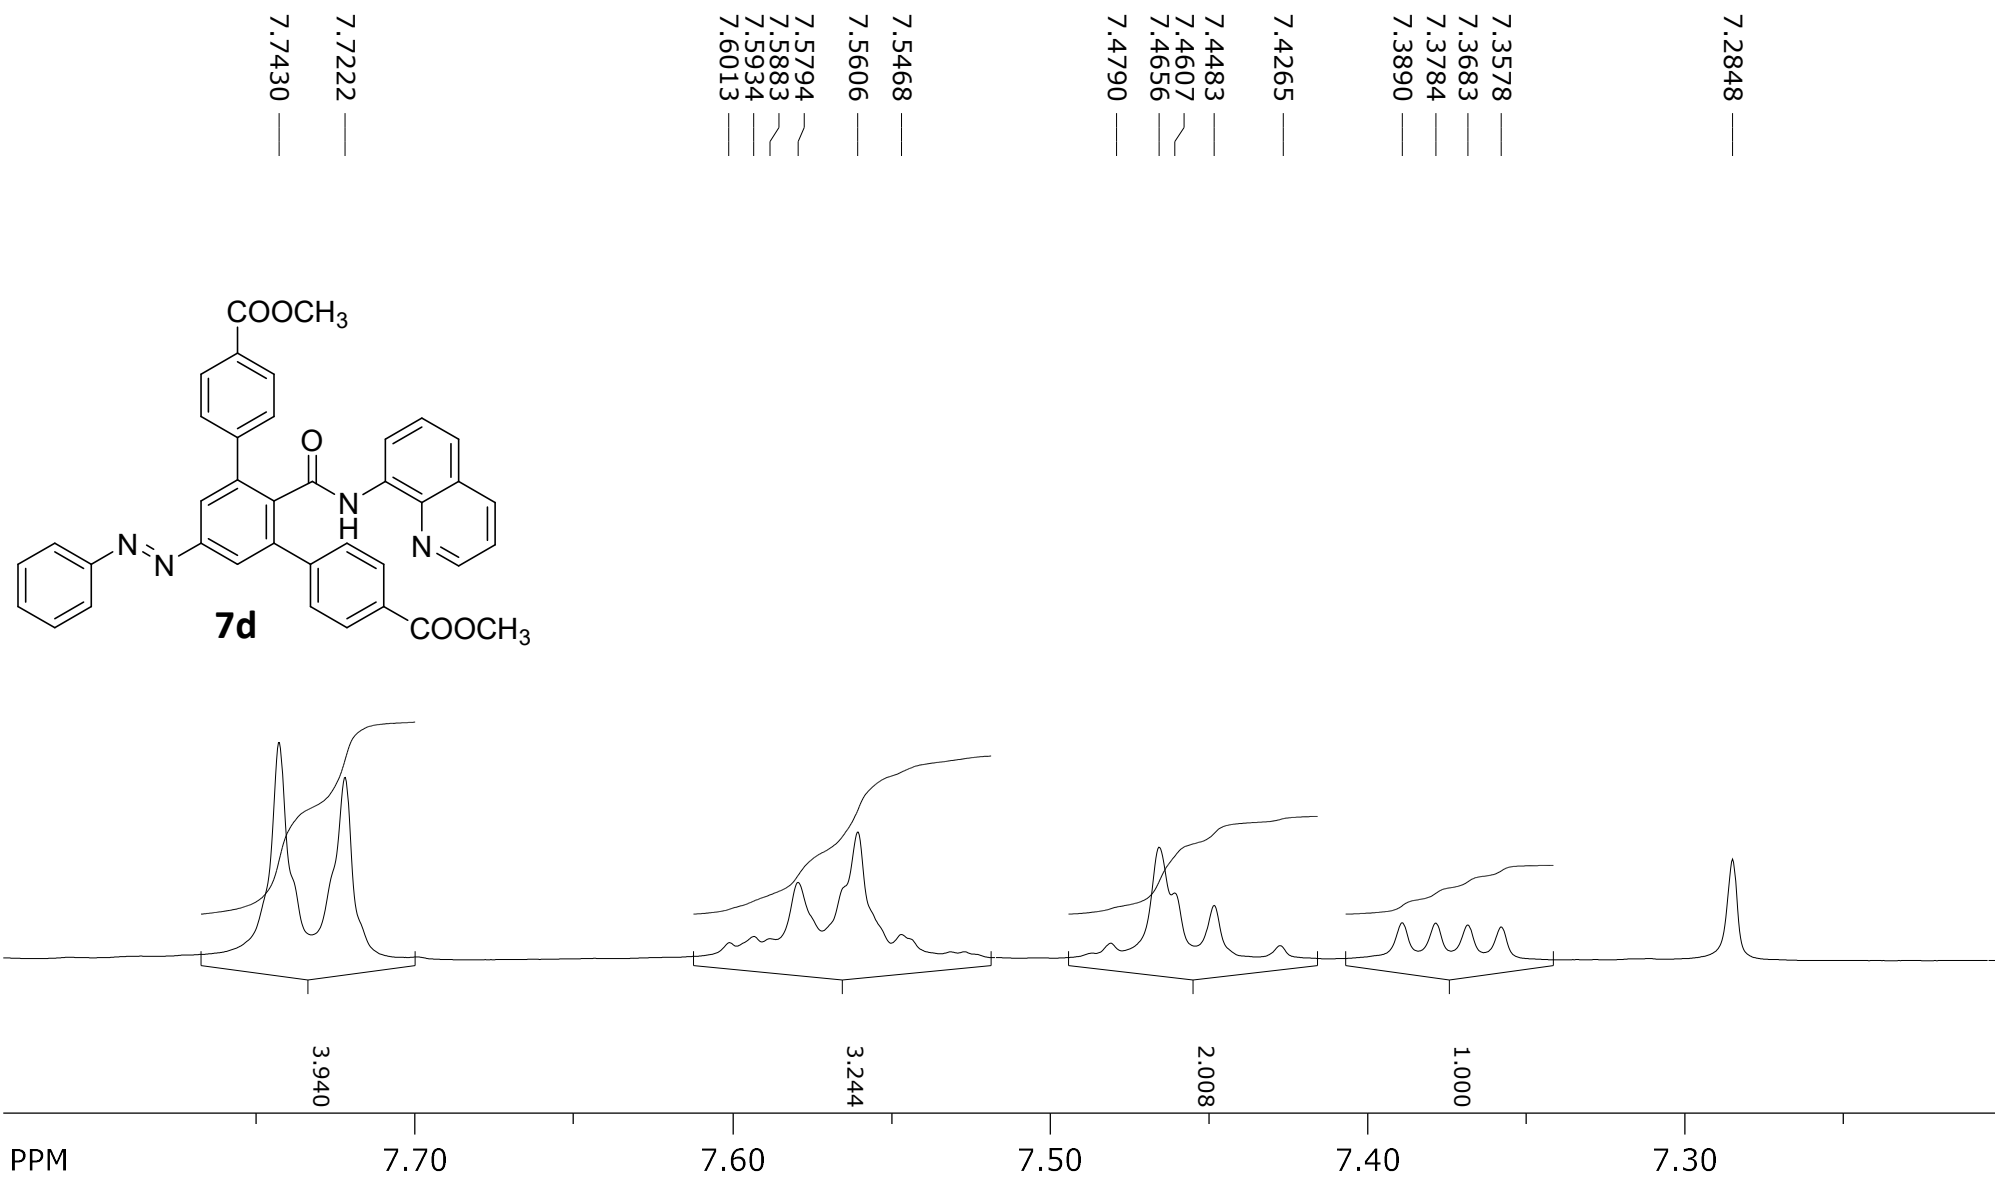



SpinWorks 4: RP 1332 R  
C13CPD CDCl3 /opt/topspin3.5pl2/nmrdata nmrsu 48

166.217  
166.762  
152.433  
148.122  
144.281  
140.924  
138.222  
137.595  
136.181  
133.693  
131.855  
129.746  
129.433  
127.737  
127.205  
124.008  
123.208  
122.149  
121.565  
116.747

76.765  
77.083  
77.400

52.122

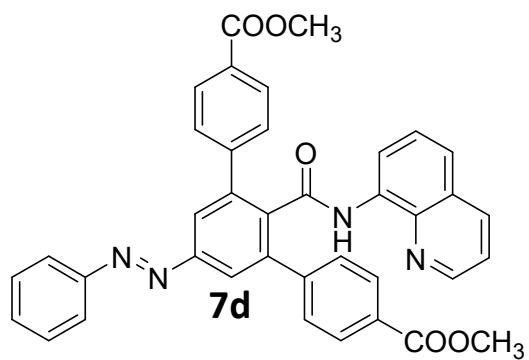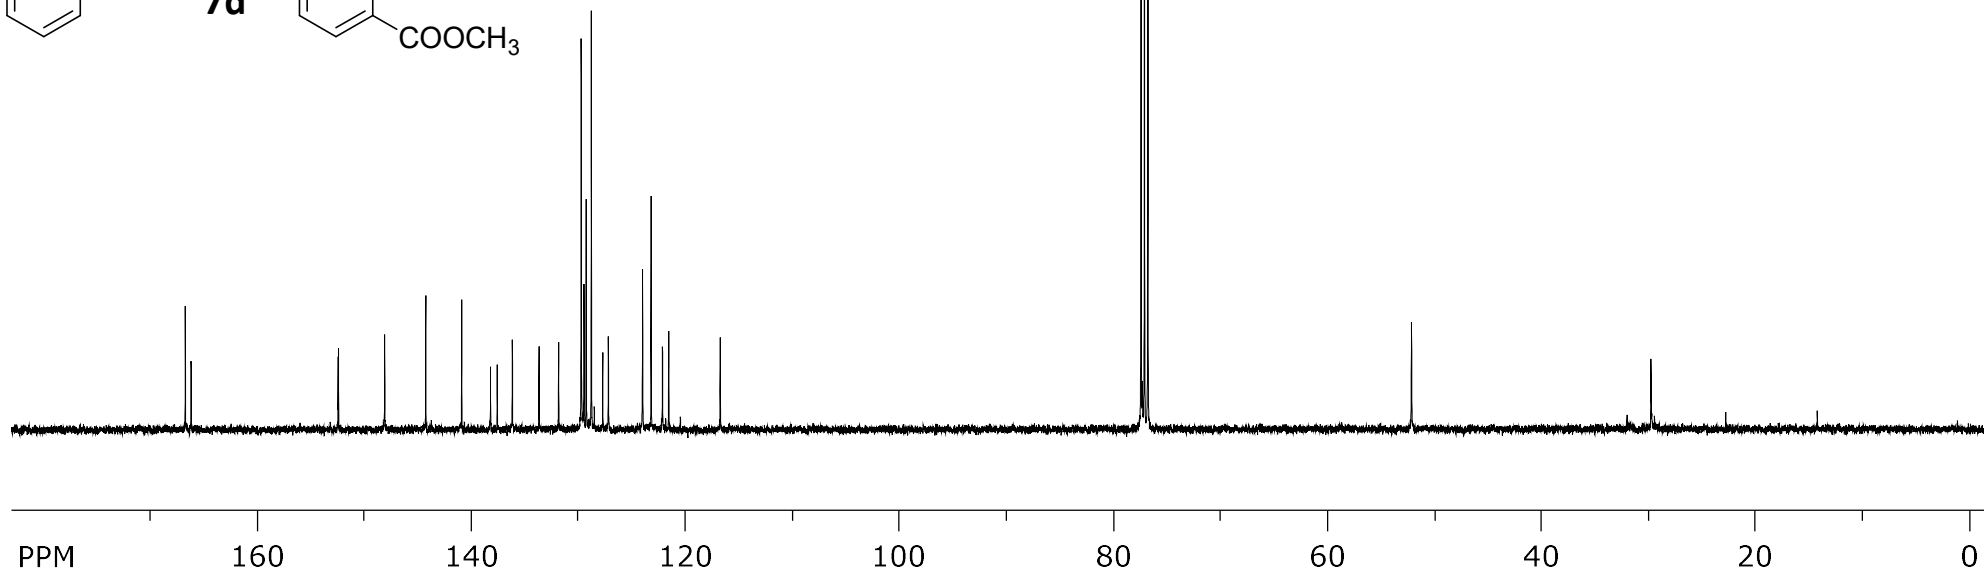

SpinWorks 4: RP 1332 R  
C13CPD CDCl3 /opt/topspin3.5pl2/nmrdata nmrsu 48

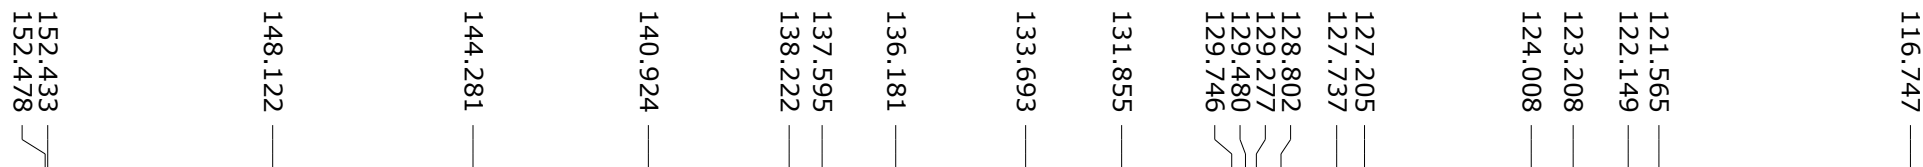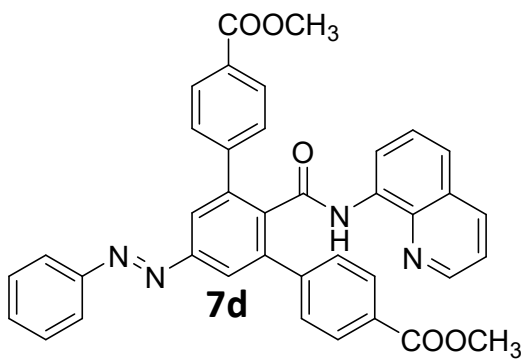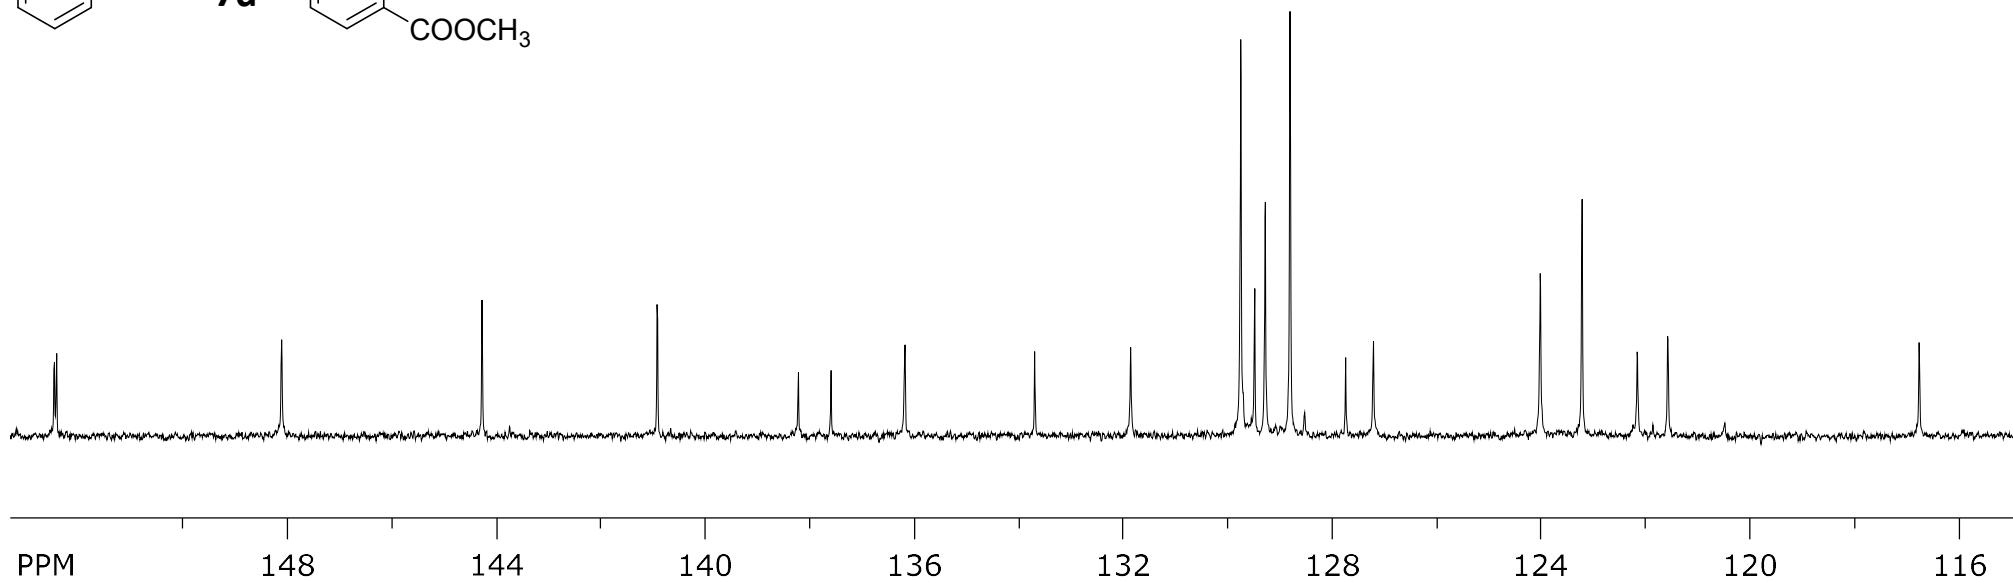





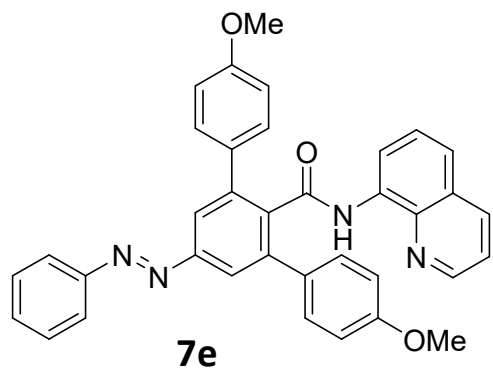

7.5257  
7.5474  
7.5659  
7.5738  
7.5876  
7.5956

7.4632  
7.4720  
7.4768

7.3648  
7.3753  
7.3854  
7.3958

7.2849

6.8254  
6.8325  
6.8543  
6.8613

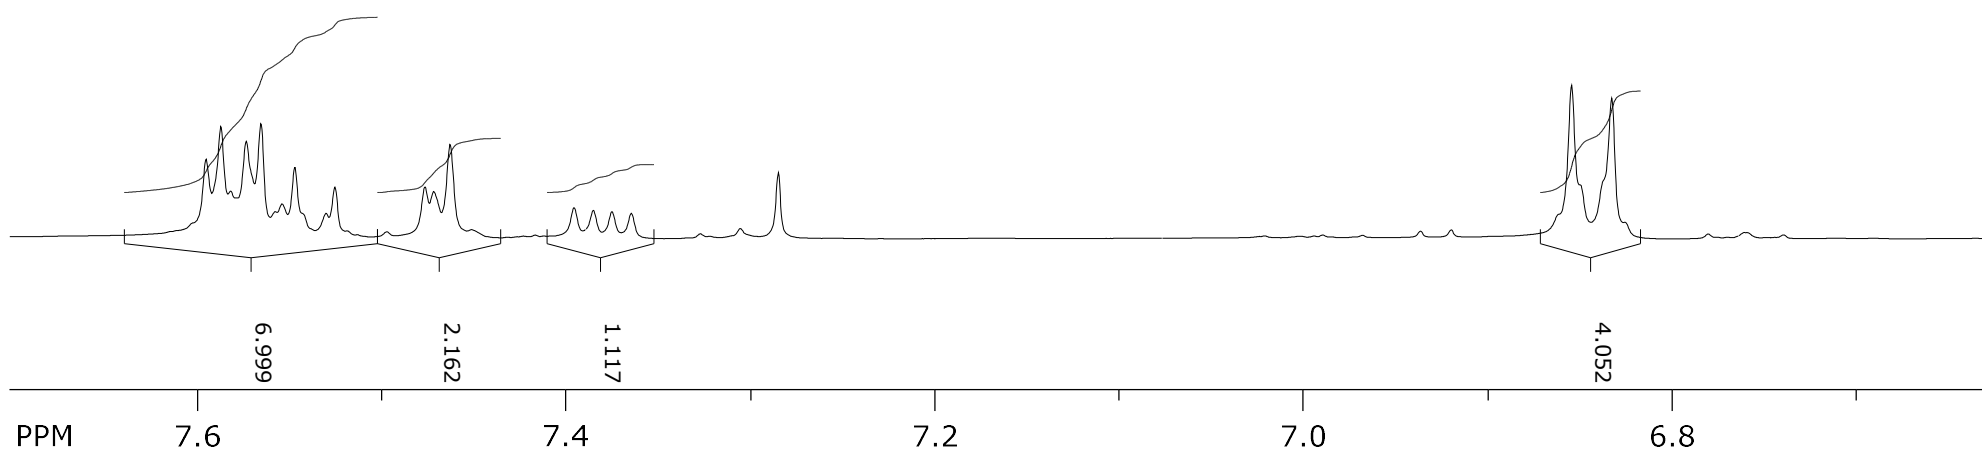

SpinWorks 4: RP 903 R4  
C13CPD CDCl3 /opt/topspin3.5pl2/nmrdata nmrsu 56

167.438  
159.182  
152.391  
147.983  
141.399  
138.347  
138.212  
137.747  
136.070  
134.252  
132.313  
131.520  
129.881  
129.694  
127.722  
127.254  
123.317  
123.112  
121.696  
121.472  
116.536  
113.841

76.794  
77.112  
77.429

55.162

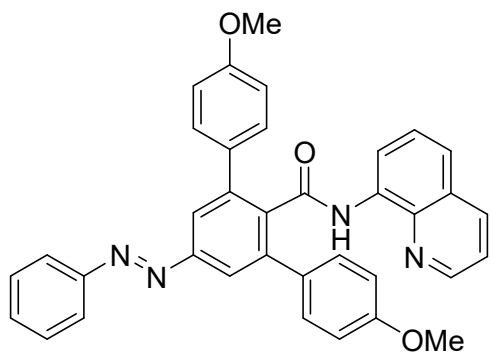

7e

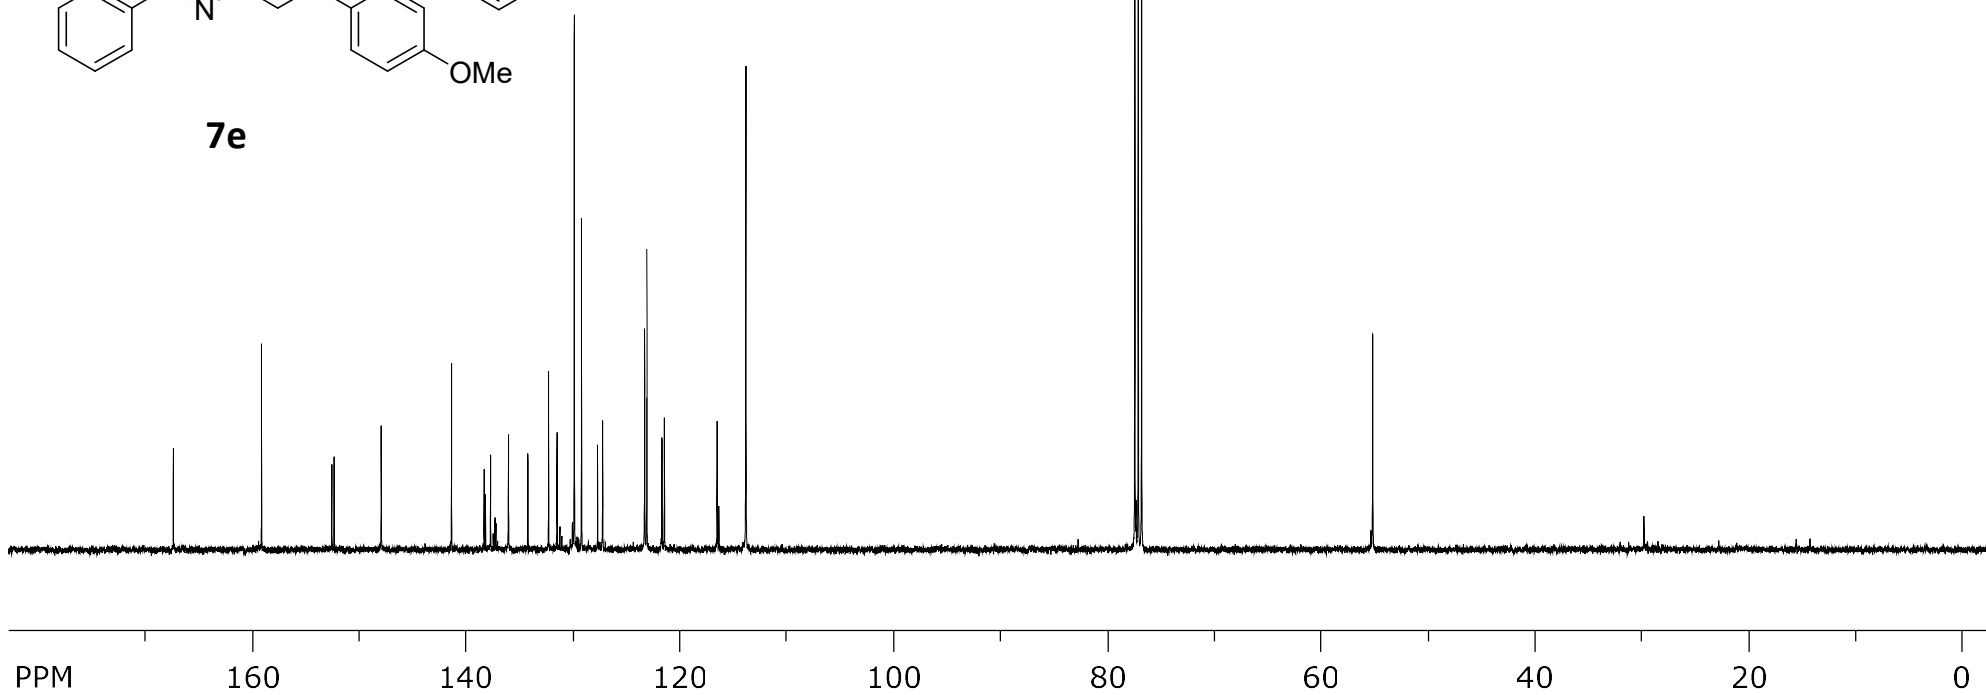

SpinWorks 4: RP\_903\_R4  
C13CPD CDCl3 /opt/topspin3.5pl2/nmrdata nmrsu 56

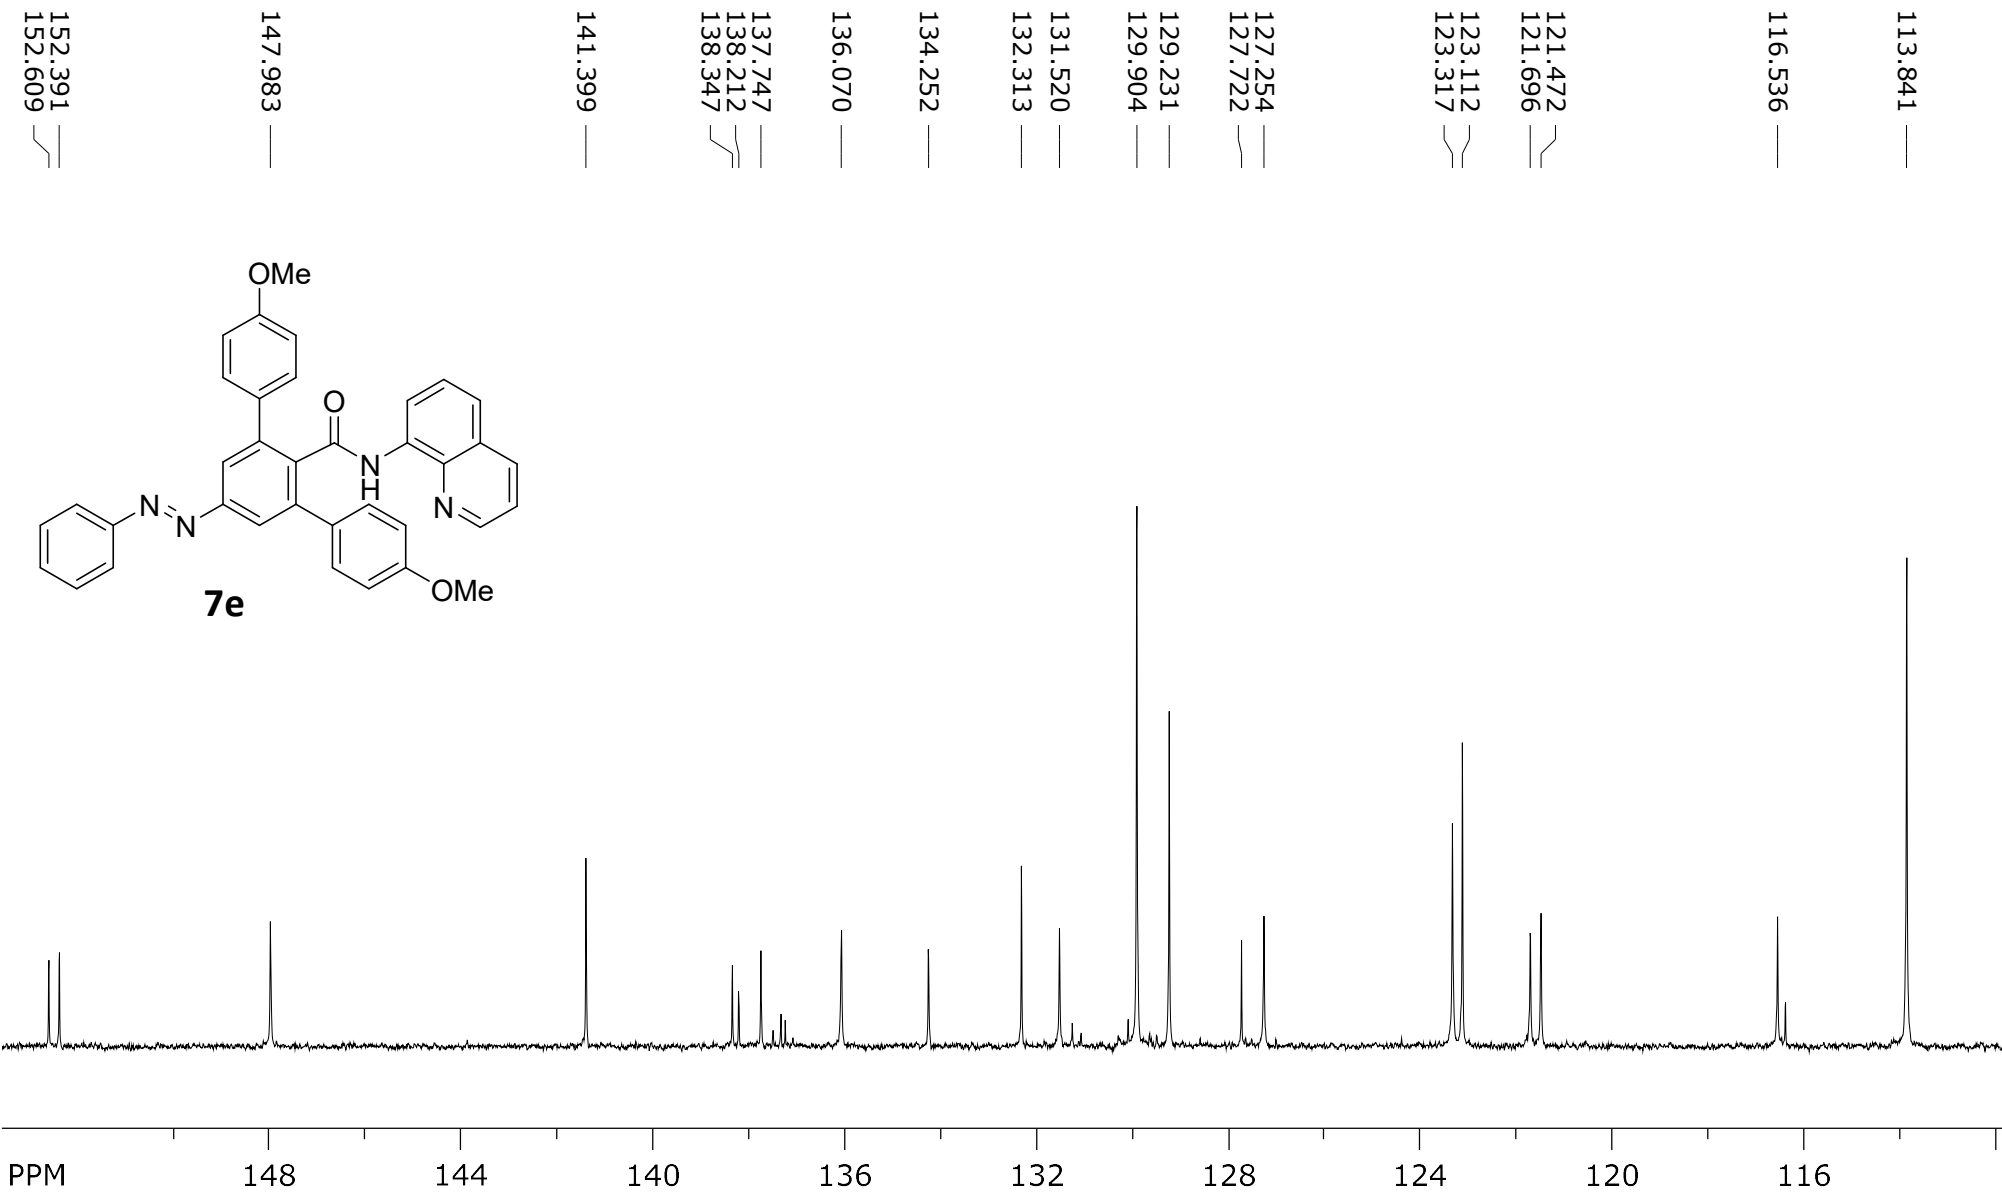

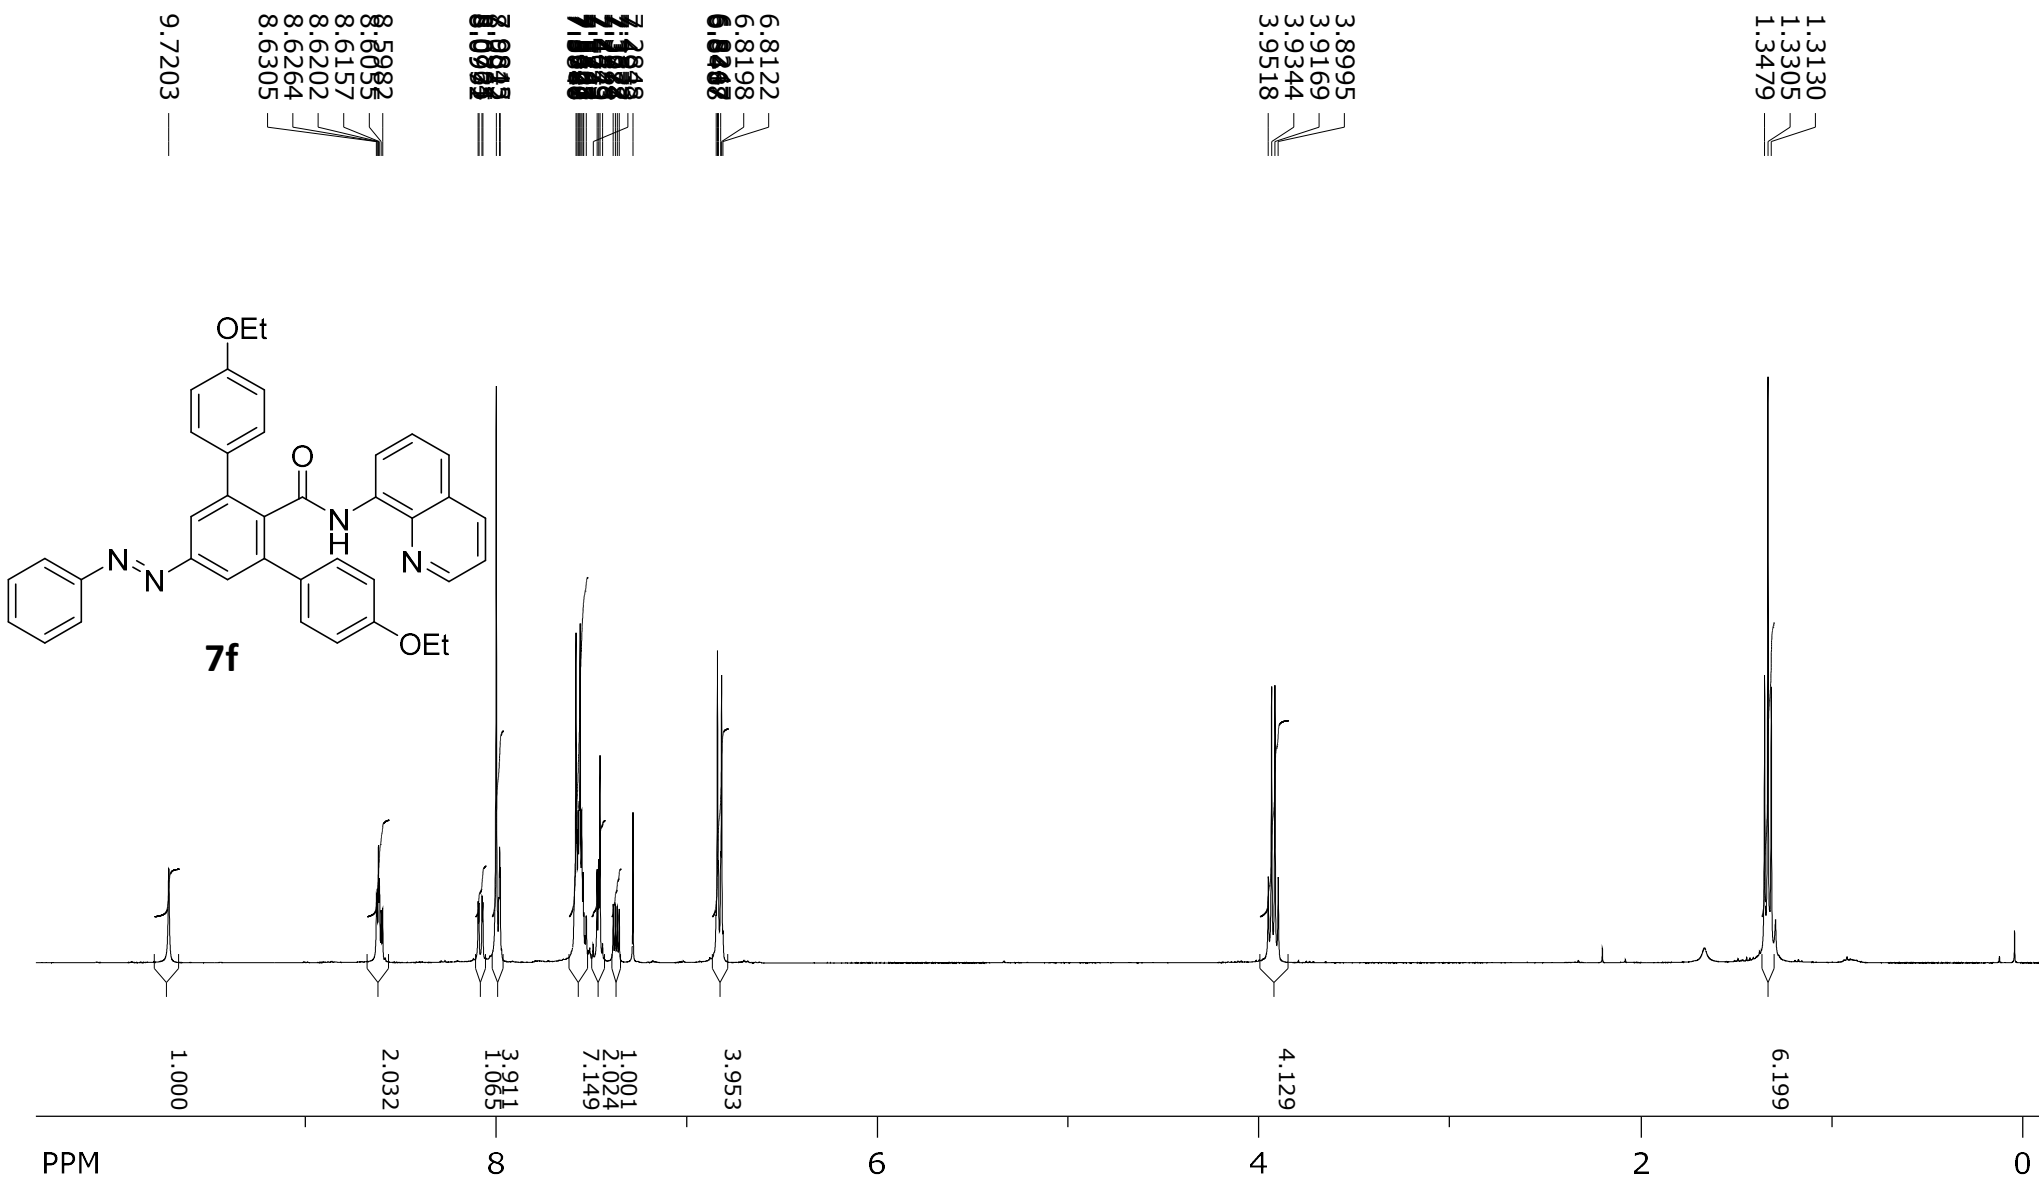



8.5982  
8.6055  
8.6157  
8.6202  
8.6264  
8.6305

8.0724  
8.0765  
8.0931  
8.0972

7.9813  
7.9845  
8.0022

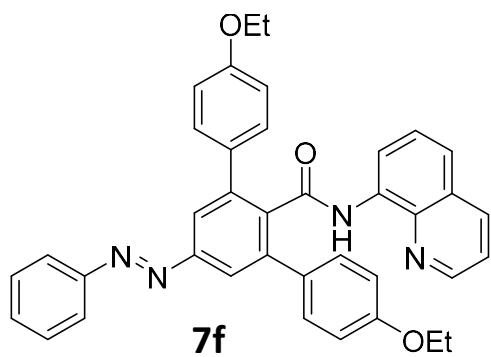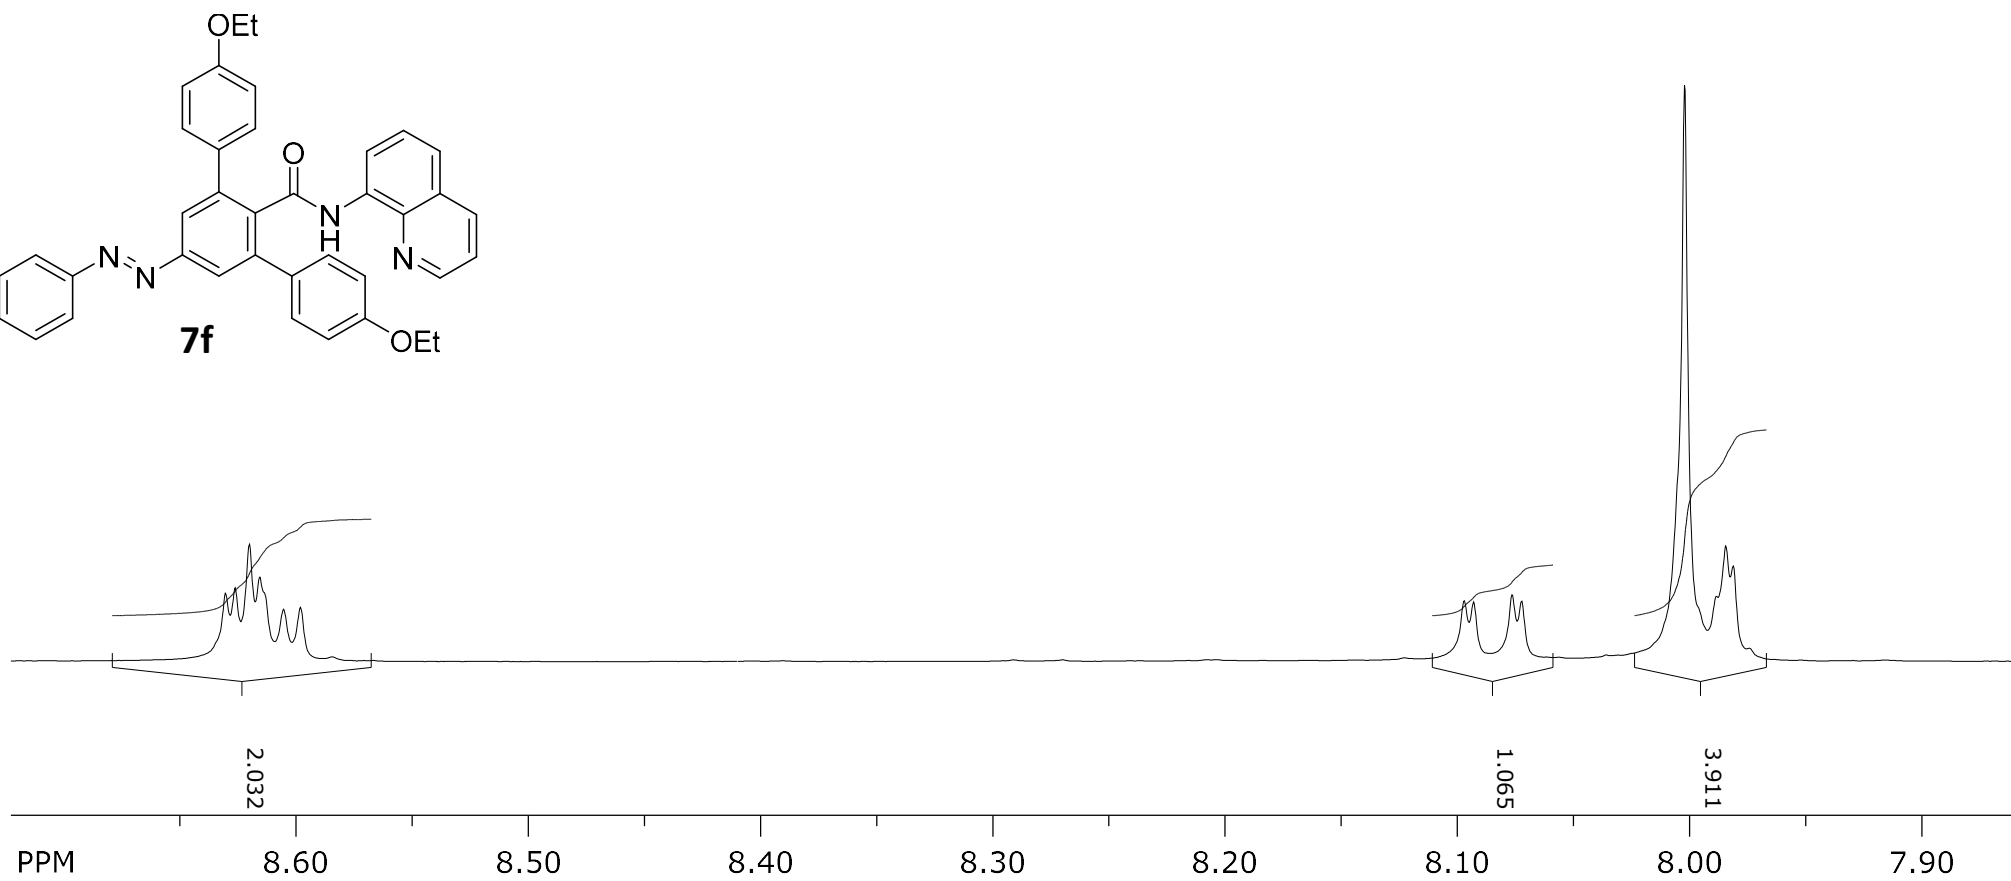

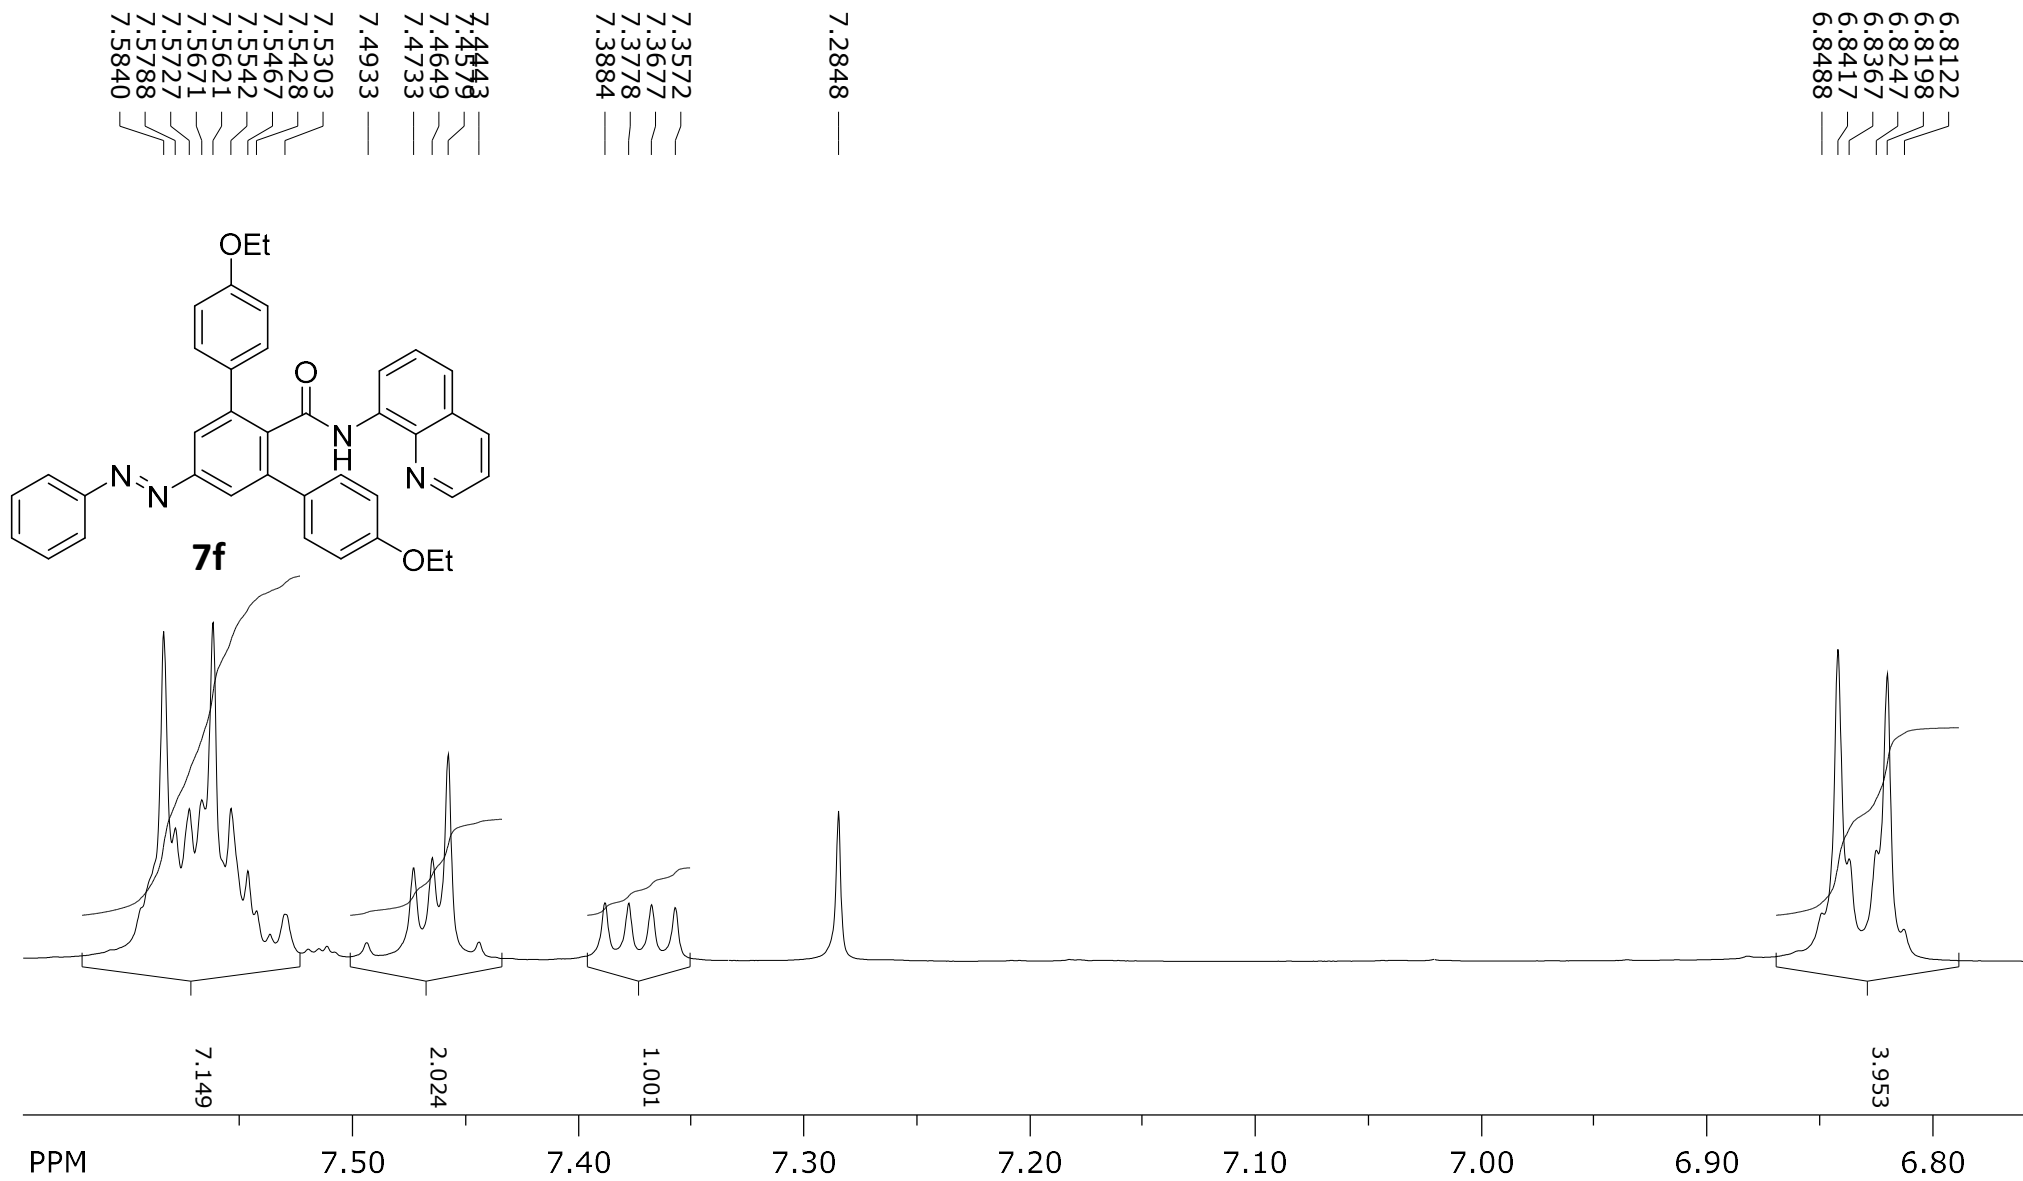

3.8995  
3.9169  
3.9344  
3.9518

1.3130  
1.3305  
1.3479

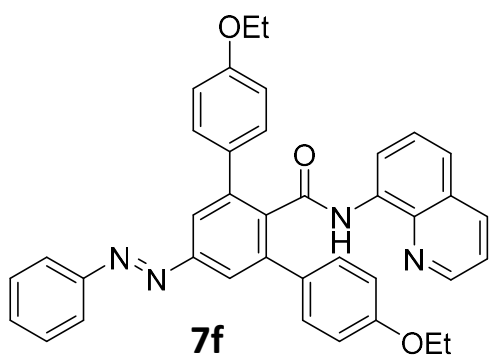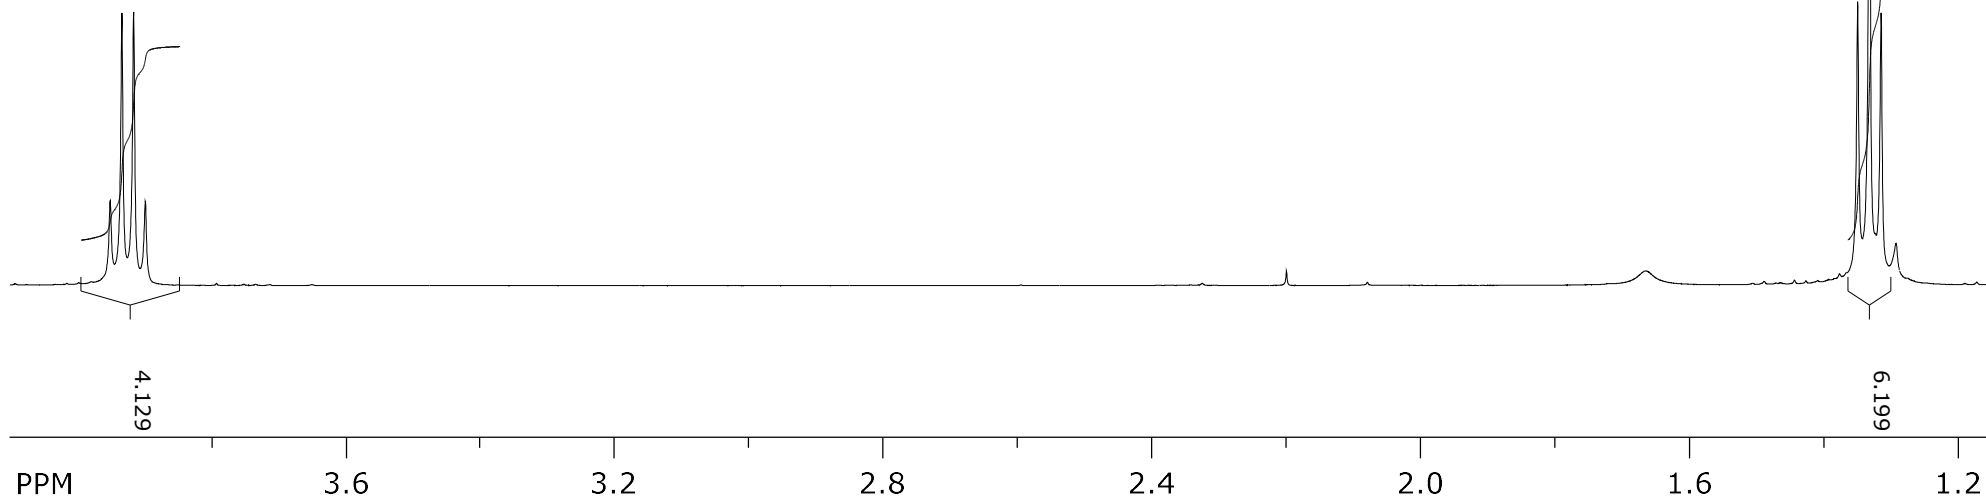



SpinWorks 4: RP 1317 R4  
PROTON CDCl3 /opt/topspin3.5pl2/nmrdata nmrsu 52

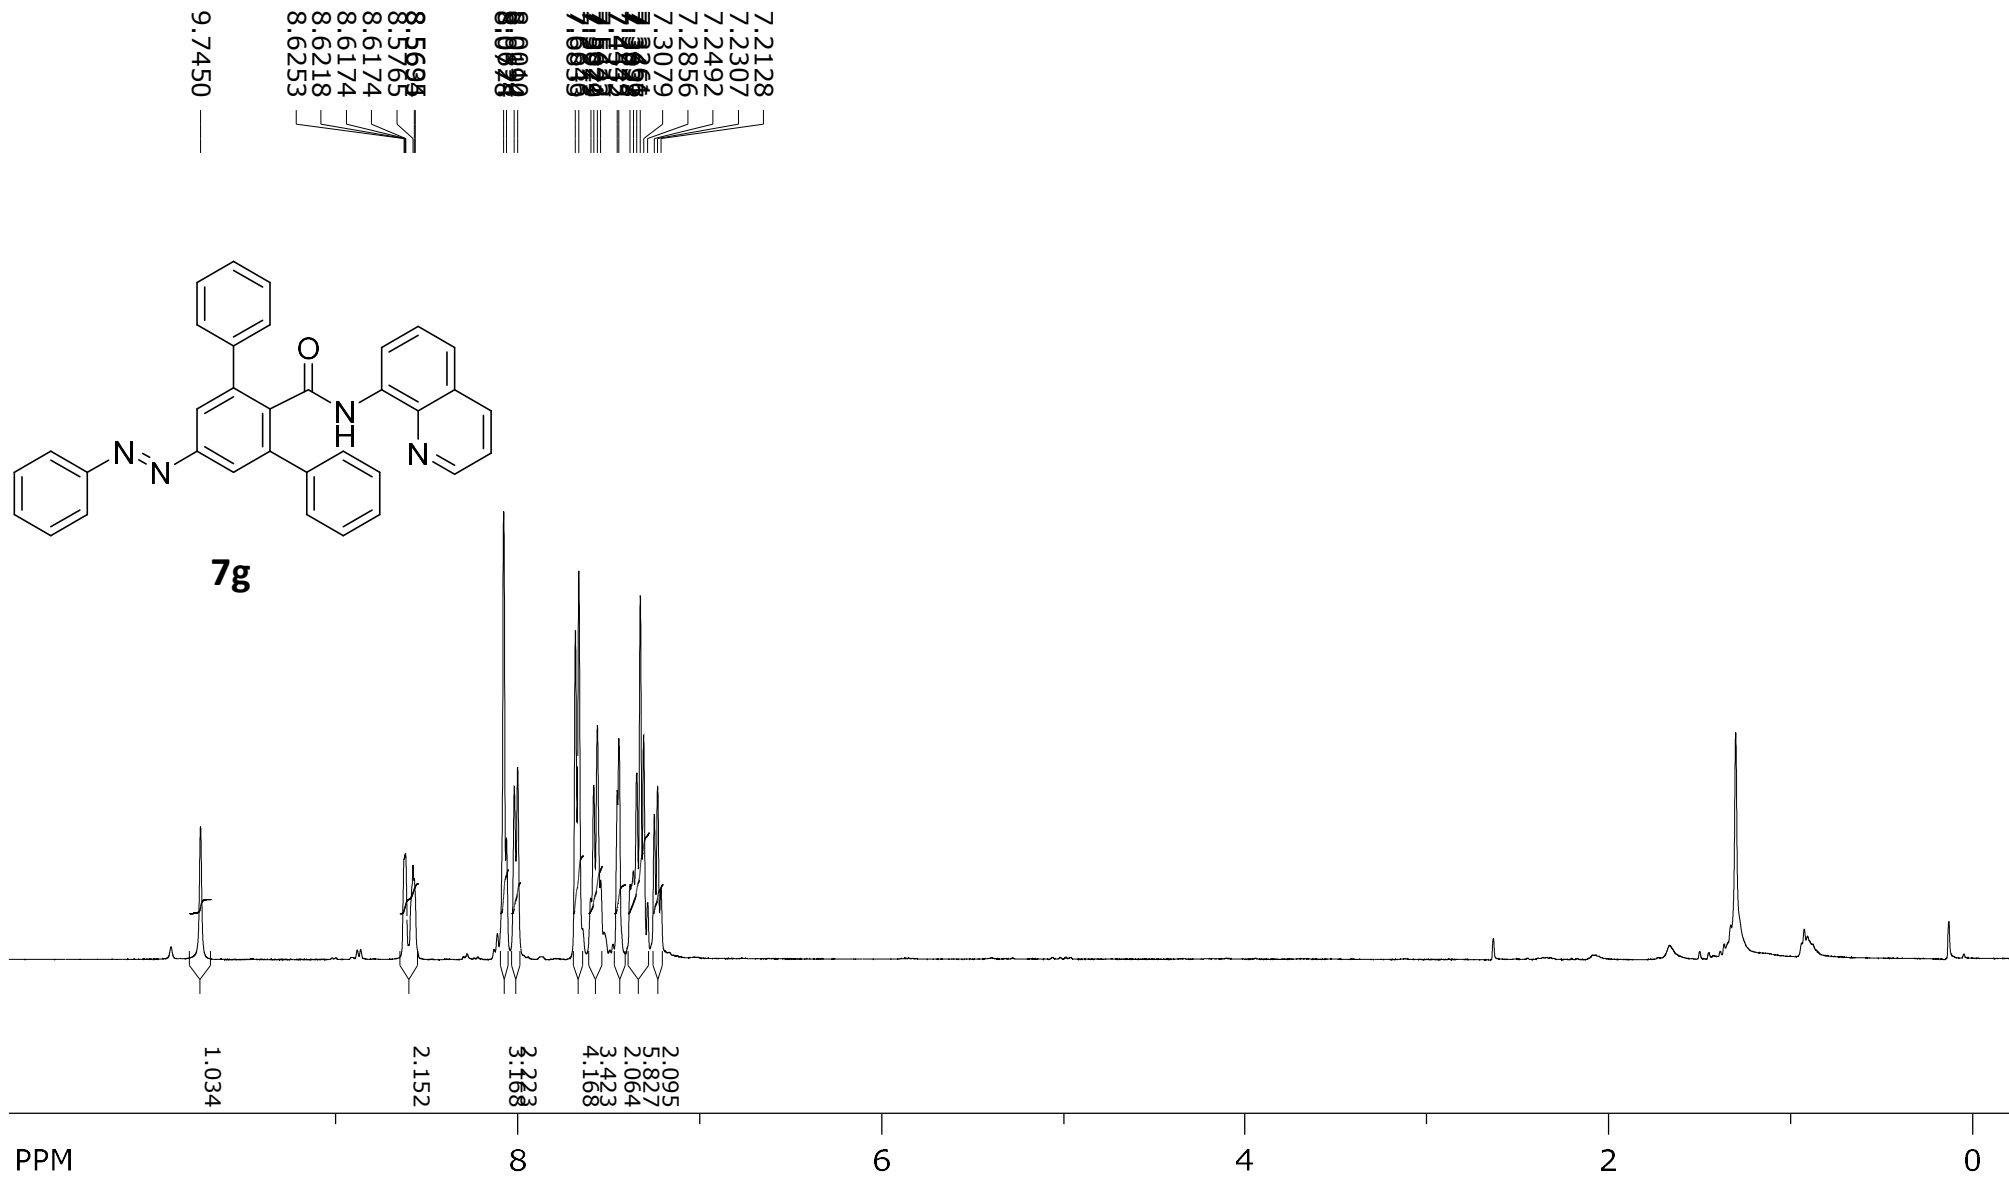

SpinWorks 4: RP 1317 R4  
PROTON CDCl3 /opt/topspin3.5pl2/nmrdata nmrsu 52

8.5635  
8.5694  
8.5765  
8.6174  
8.6174  
8.6218  
8.6253

8.0010  
8.0194  
8.0624  
8.0778

7.6646  
7.6833  
7.5443  
7.5622  
7.5821  
7.5979

7.4445  
7.4532  
7.2128  
7.2307  
7.2492  
7.2856  
7.3079  
7.3261  
7.3456  
7.3637  
7.3823

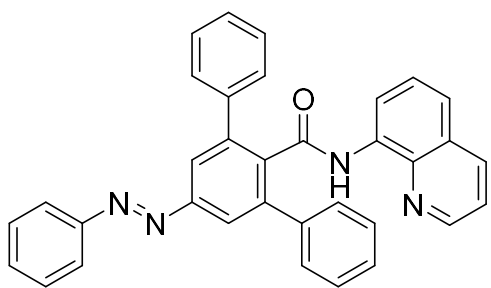

**7g**

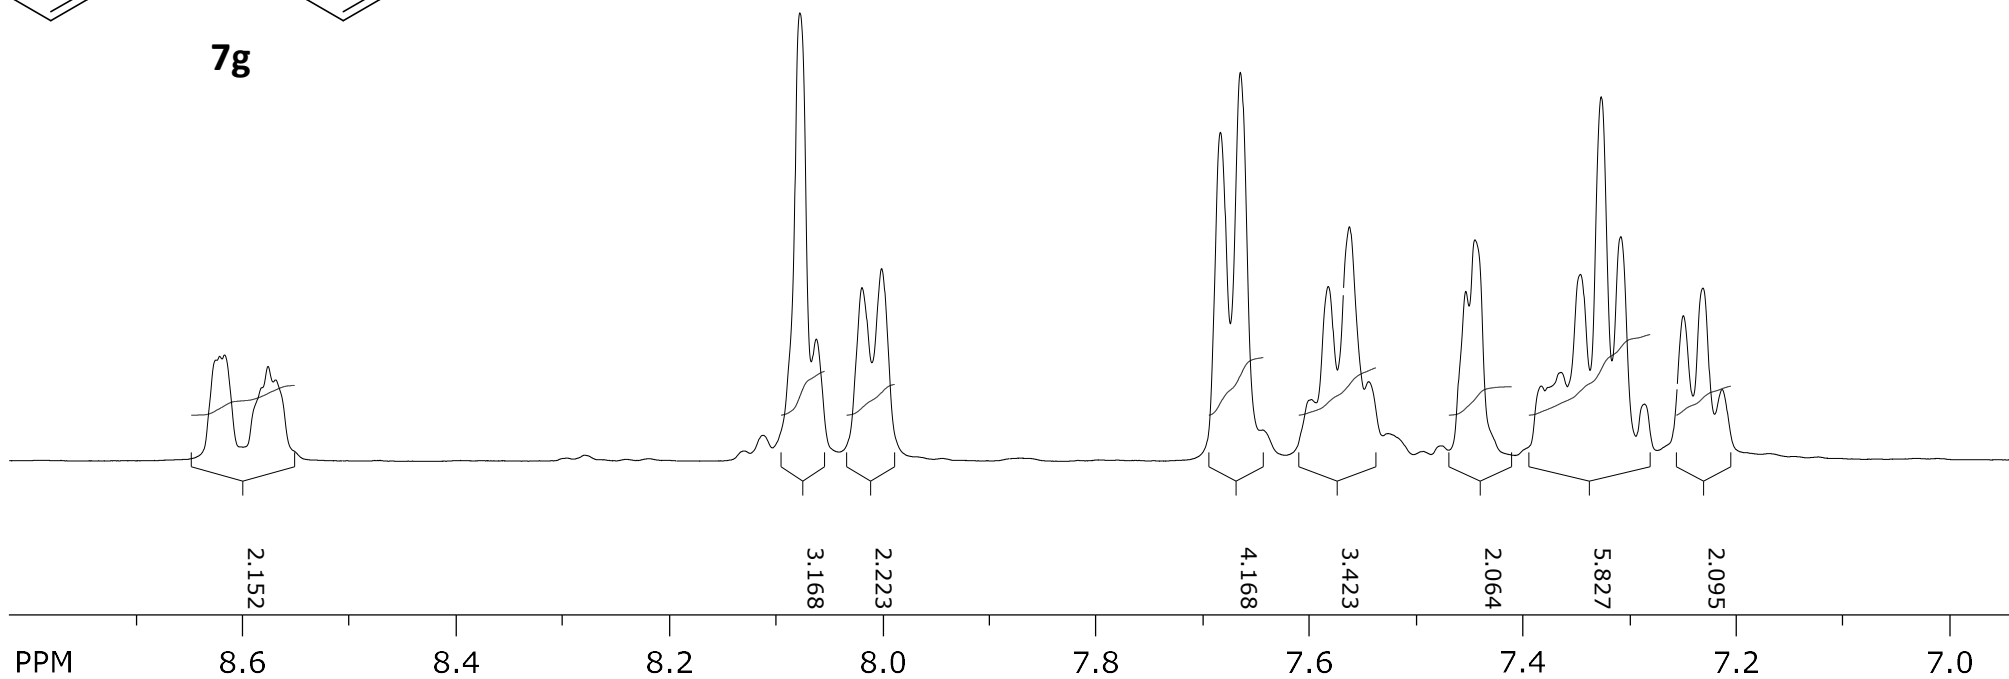



SpinWorks 4: RP 1317 R4  
C13CPD CDCl3 /opt/topspin3.5pl2/nmrdata nmrsu 52

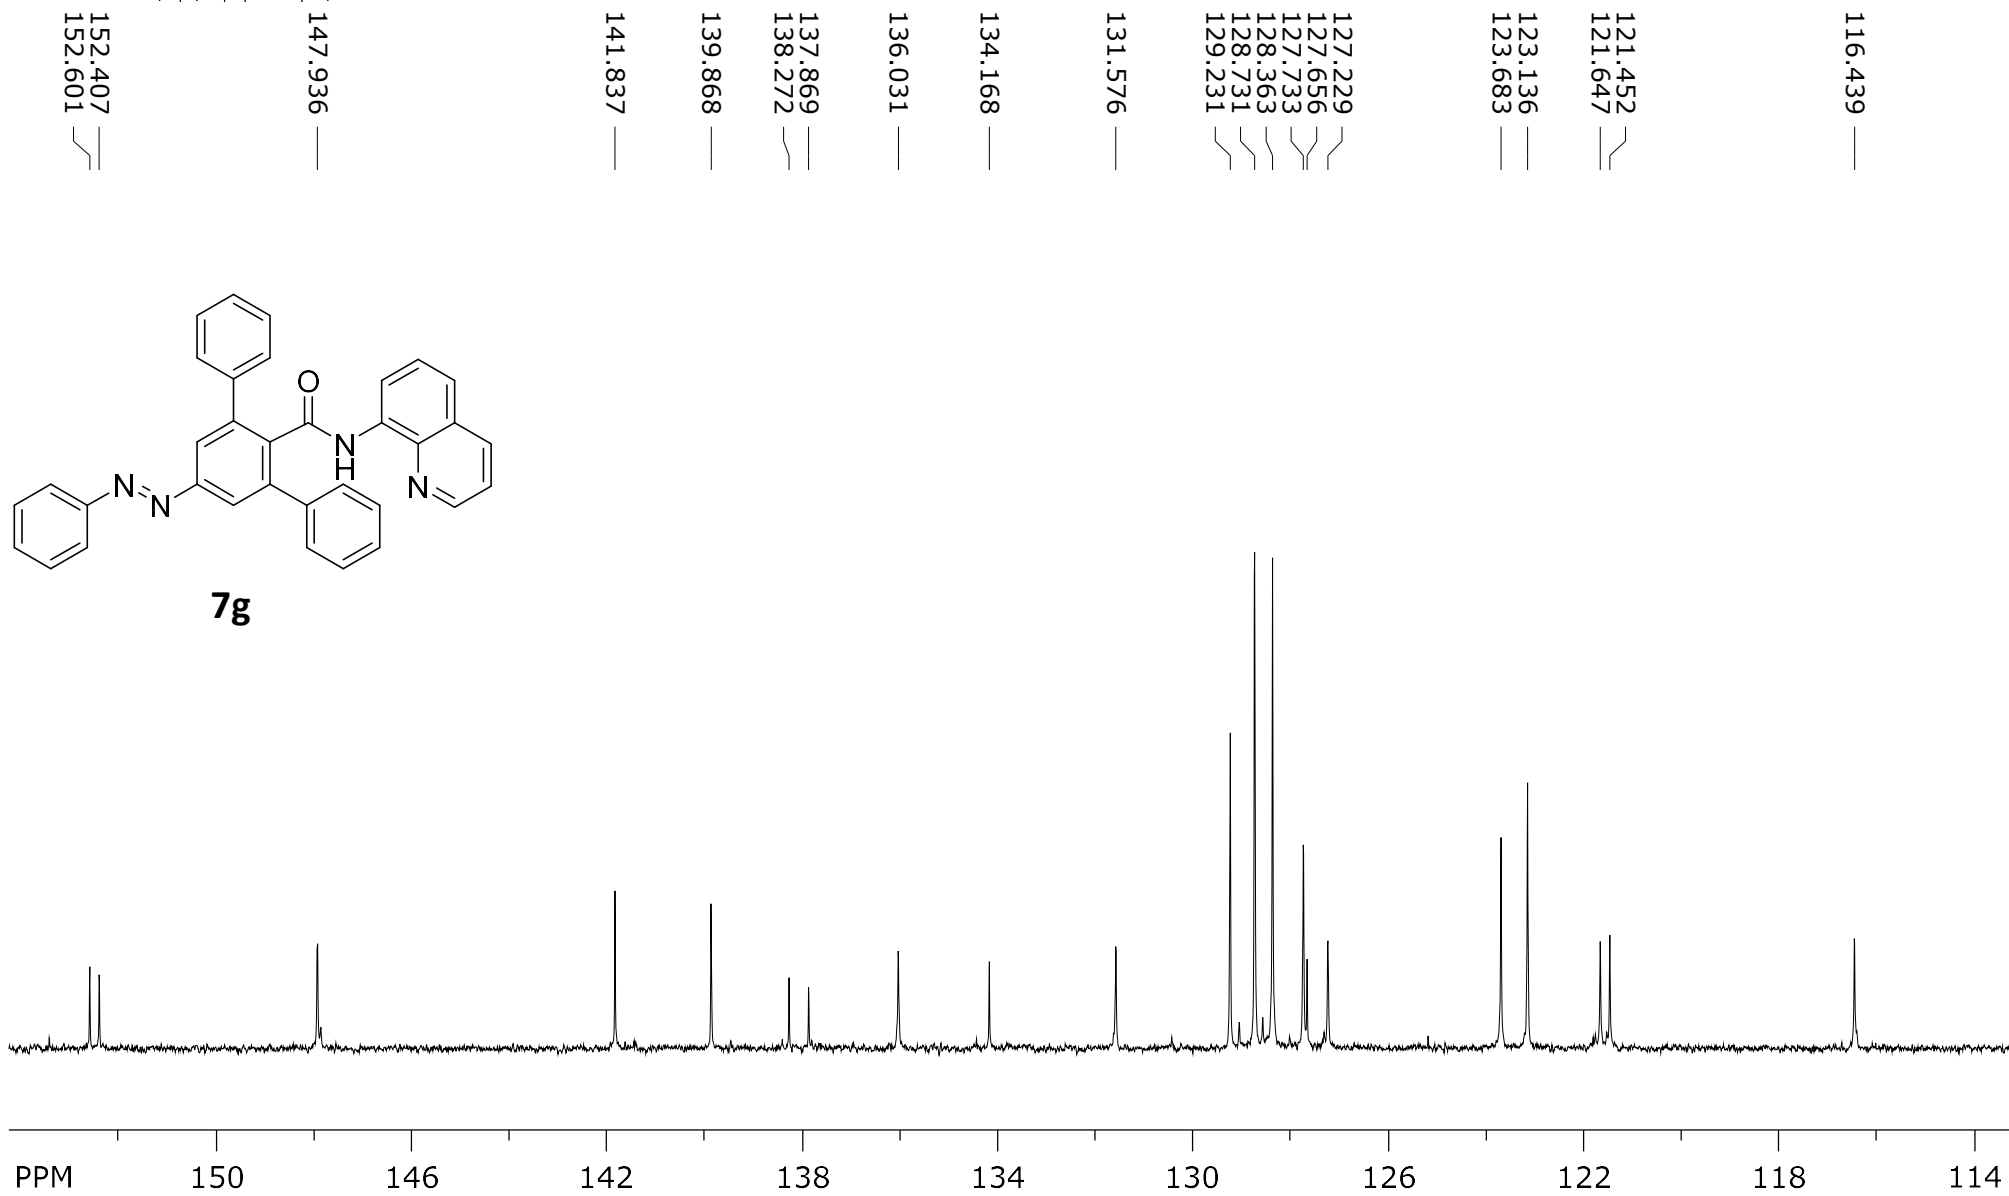



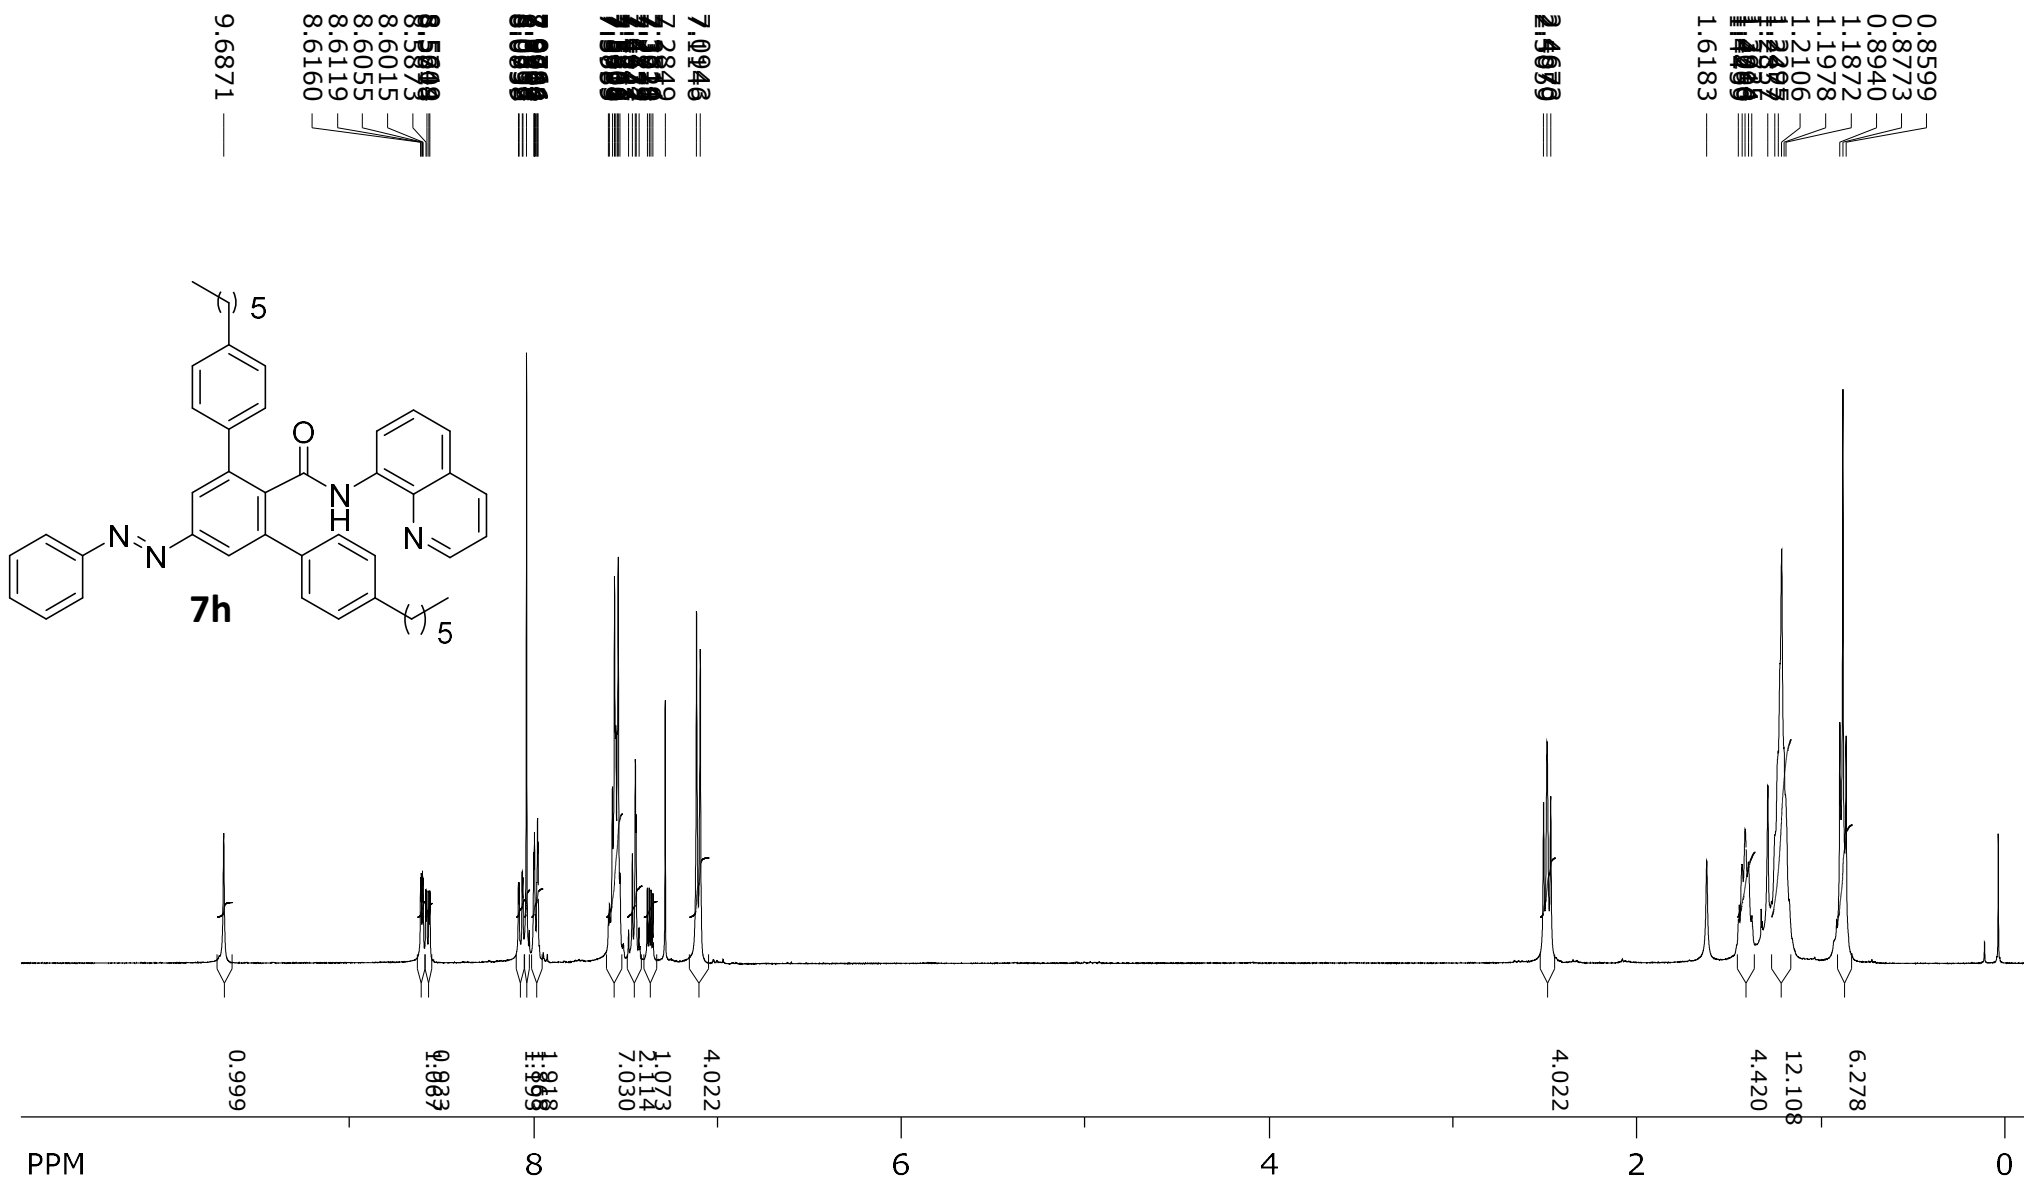

8.5649  
8.5704  
8.5818  
8.5873  
8.6015  
8.6055  
8.6119  
8.6160

7.9764  
7.9796  
7.9836  
7.9912  
7.9963  
7.9963  
7.9963  
8.0004  
8.0394  
8.0592  
8.0632  
8.0798  
8.0839

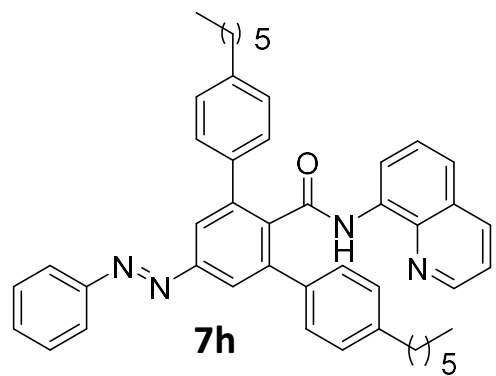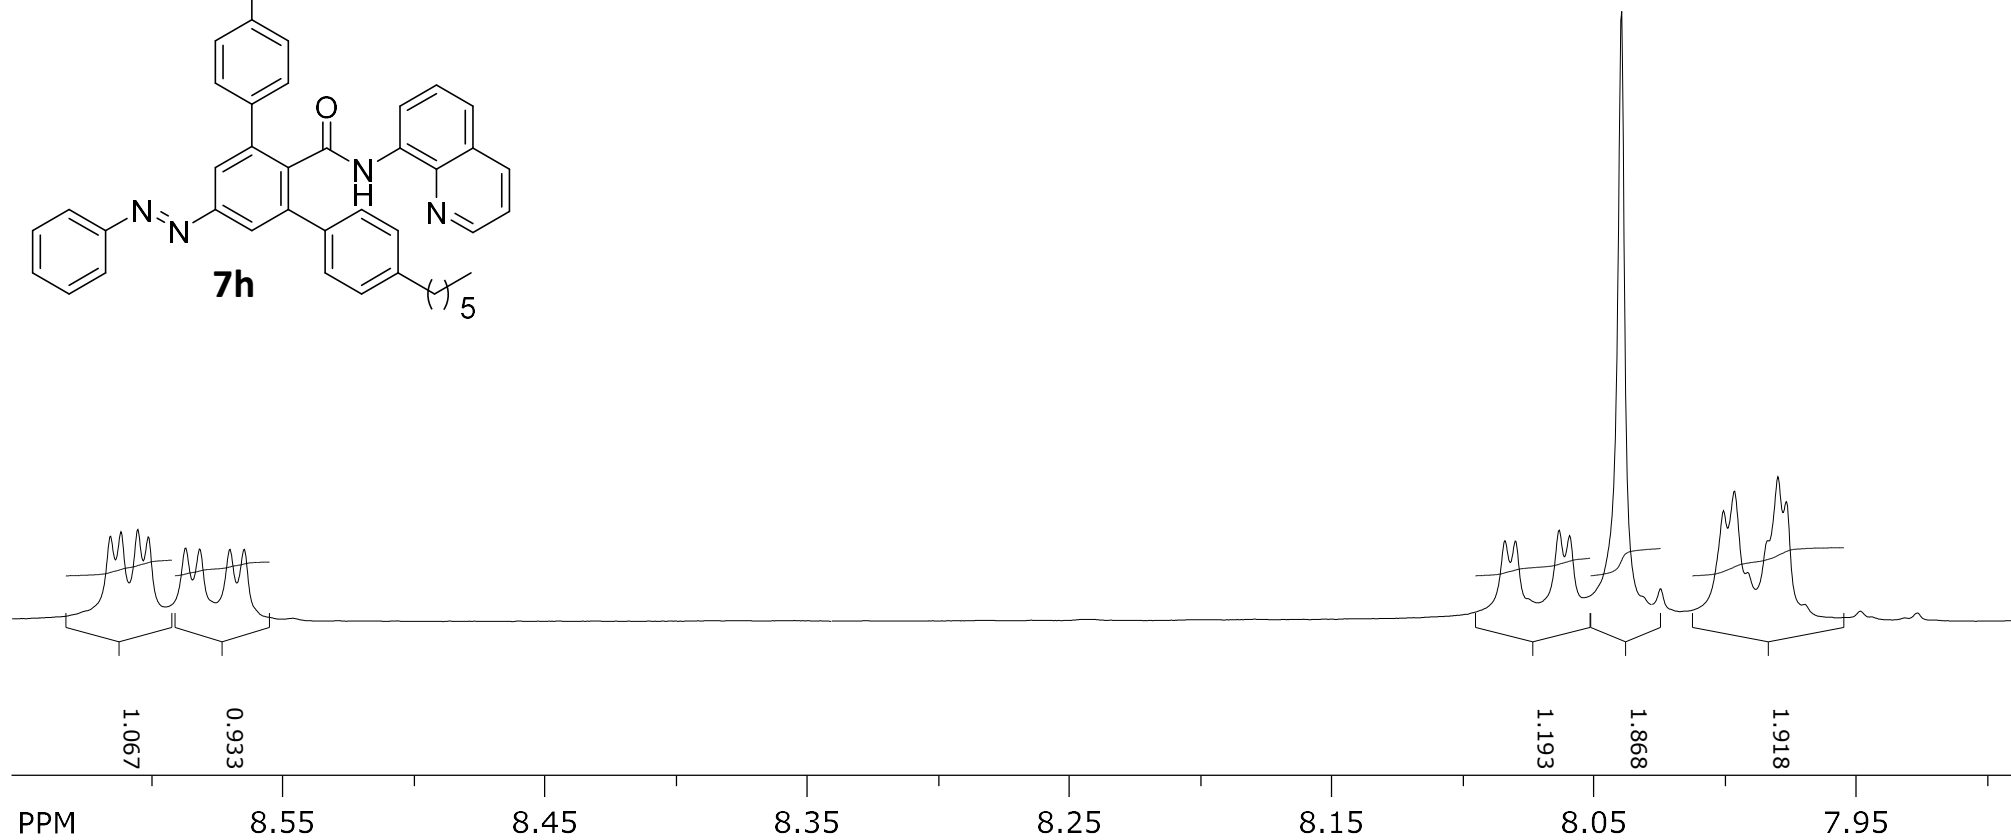

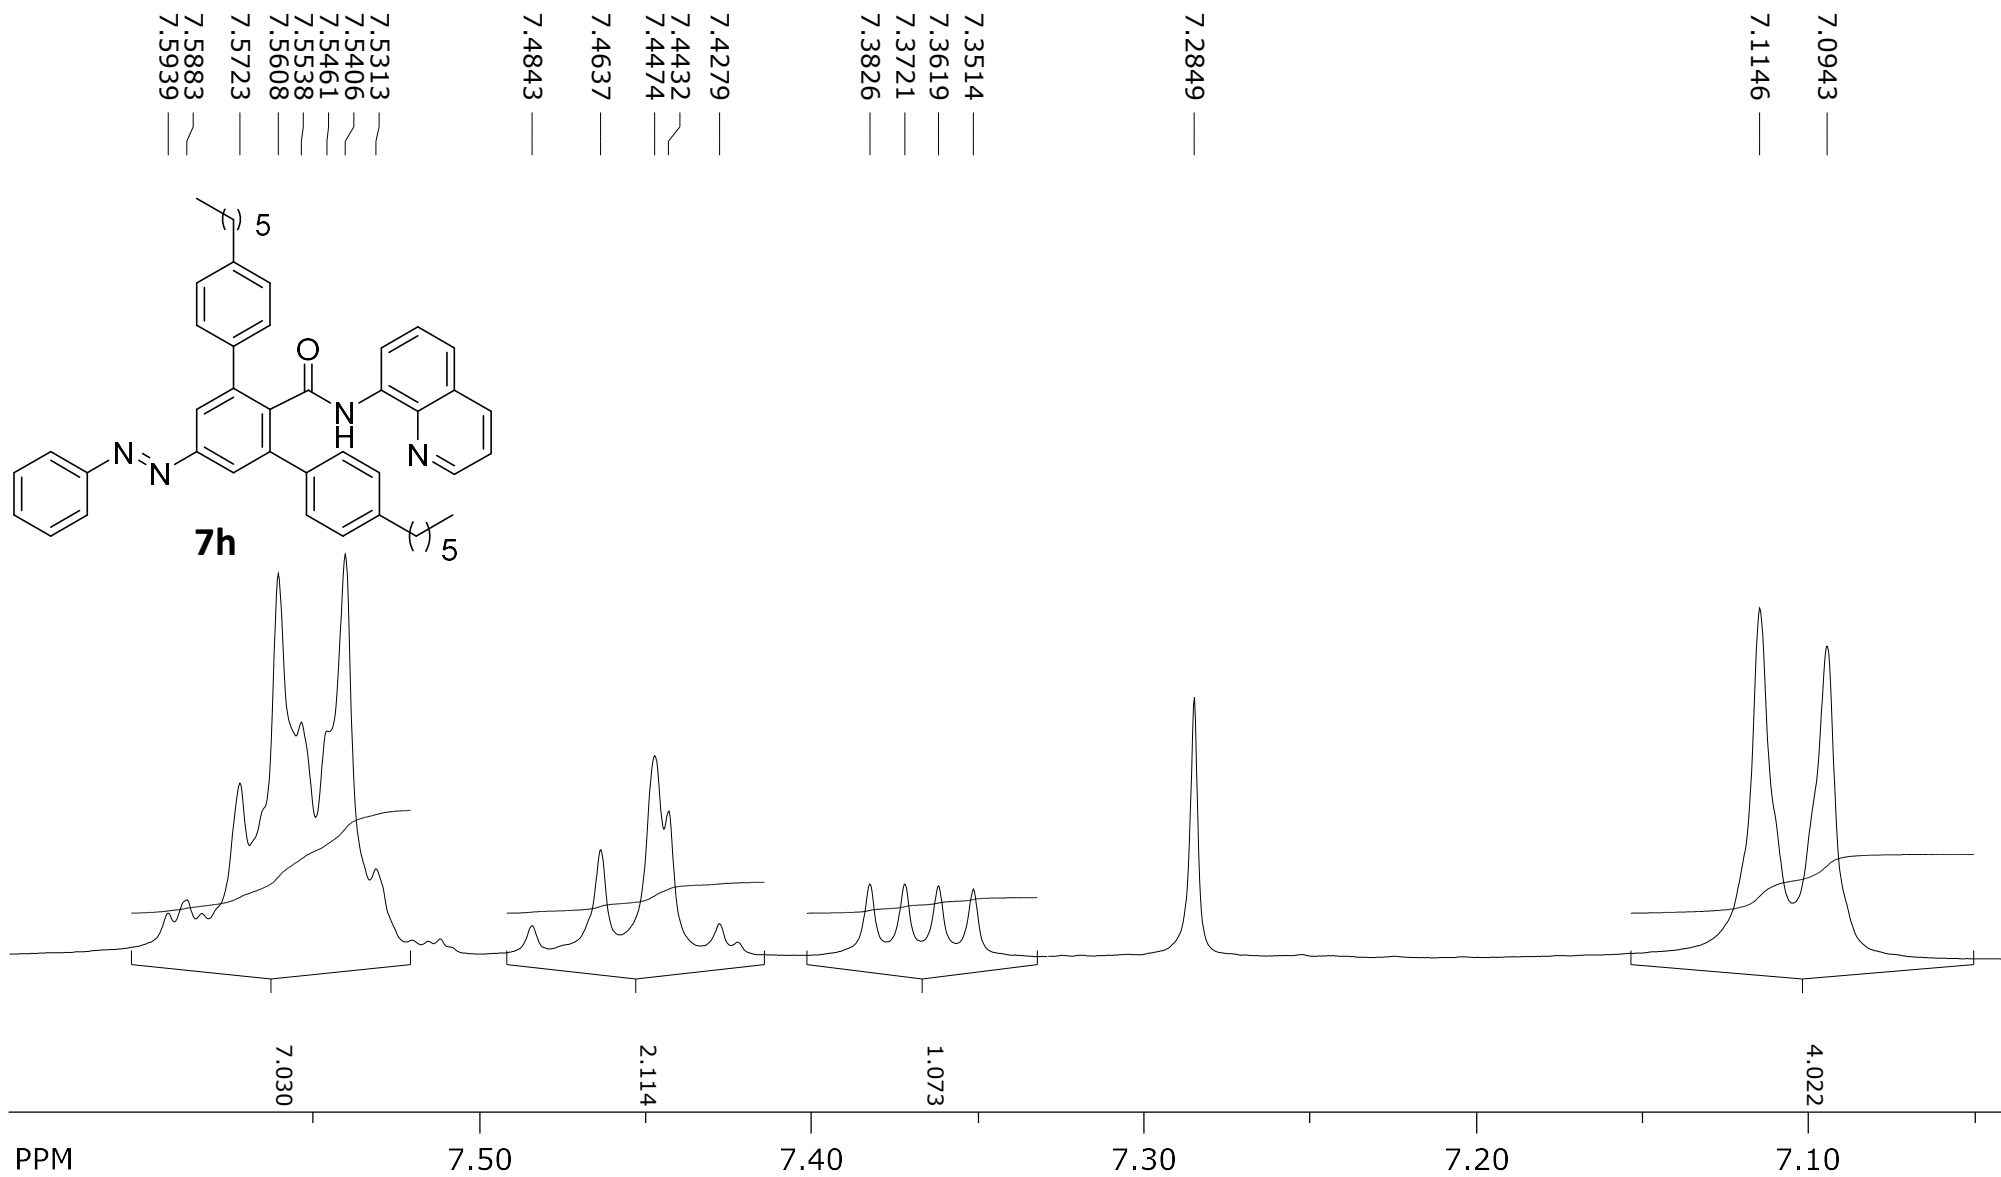

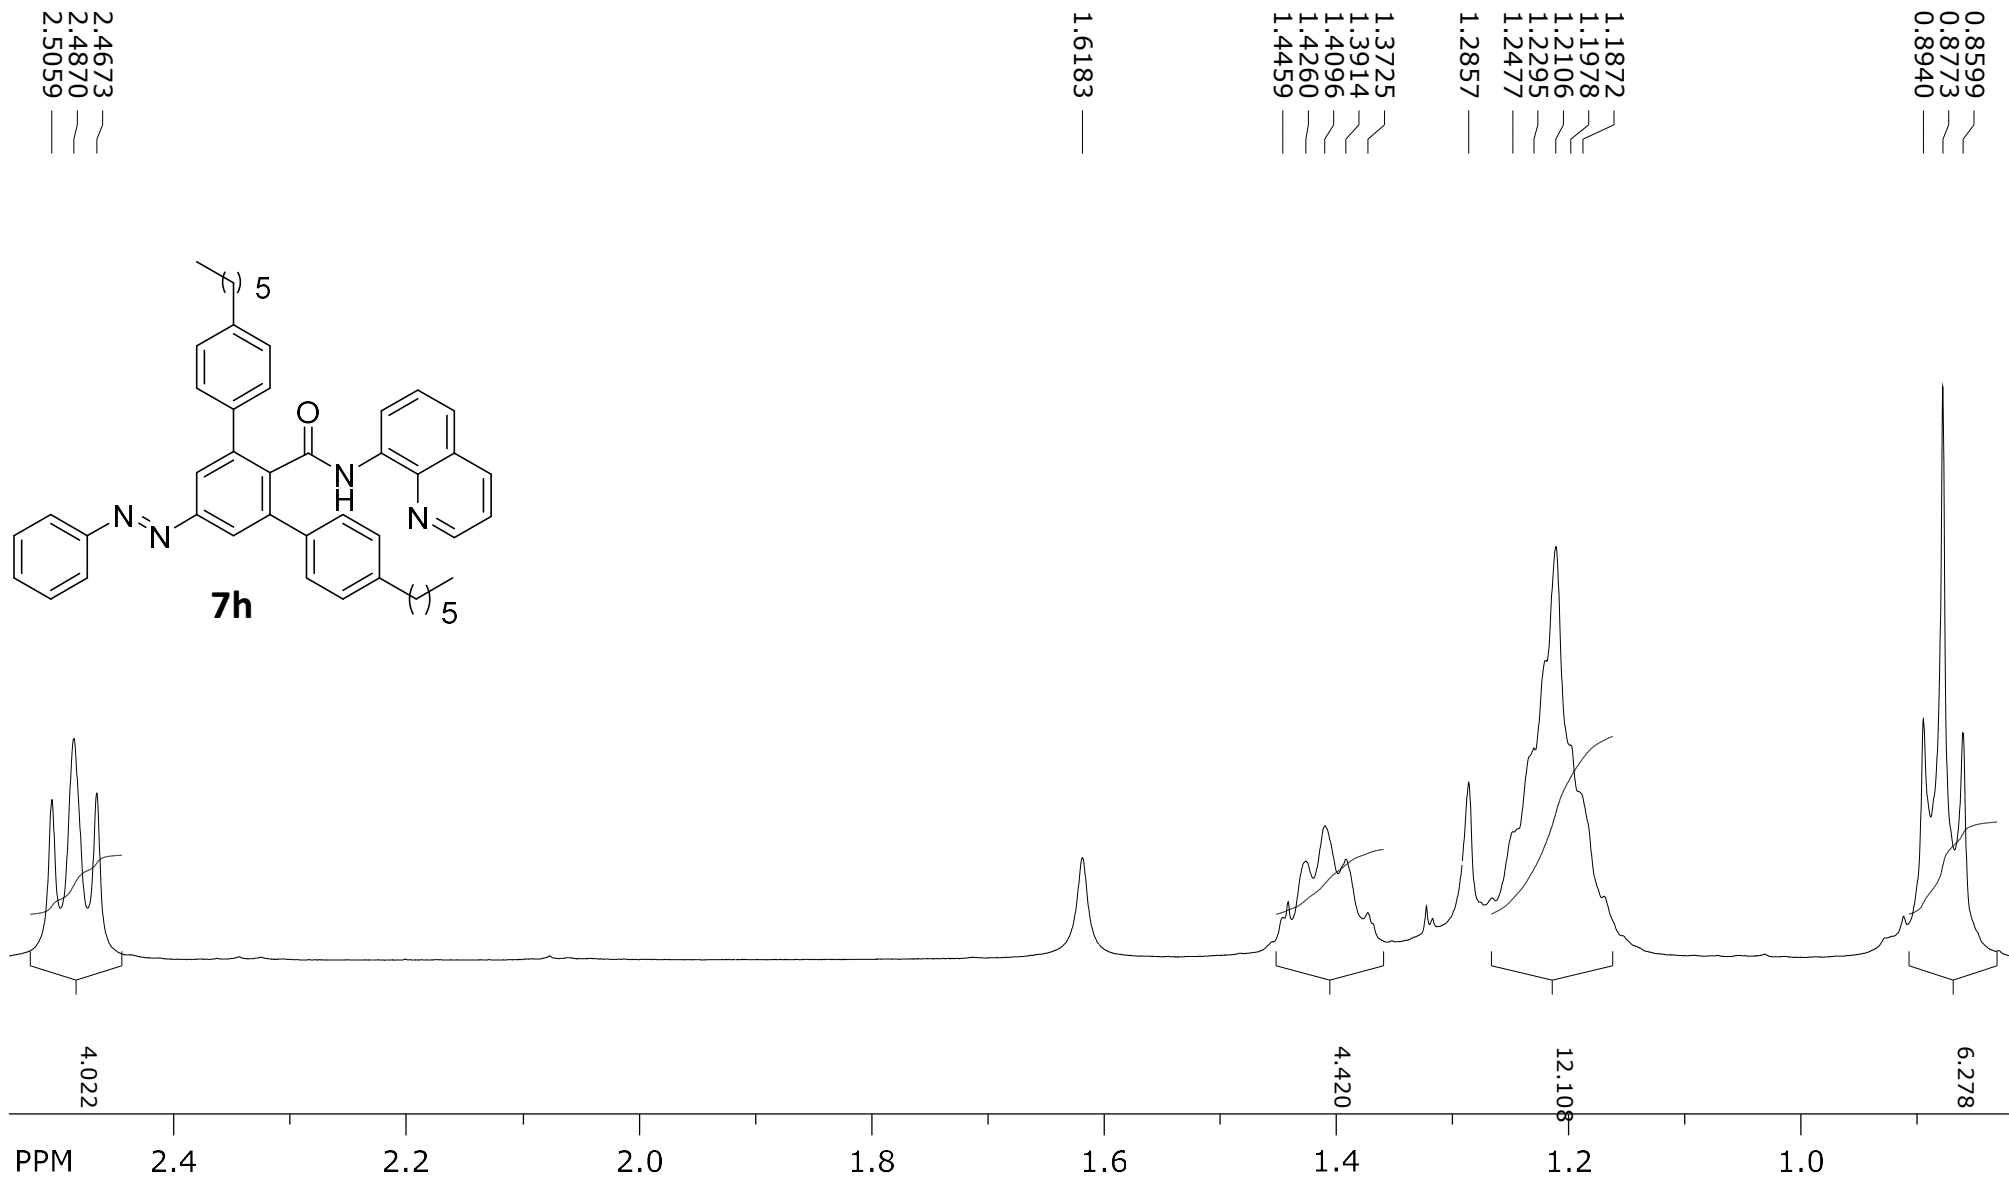



SpinWorks 4: RP 1165 A2  
C13CPD CDCl3 /opt/topspin3.5pl2/nmrdata nmrsu 9

152.448  
152.664  
147.844  
141.931  
142.400  
138.316  
137.250  
137.895  
135.924  
134.391  
131.488  
129.211  
128.631  
128.421  
128.374  
127.654  
127.233  
123.491  
123.131  
121.497  
121.376  
116.408

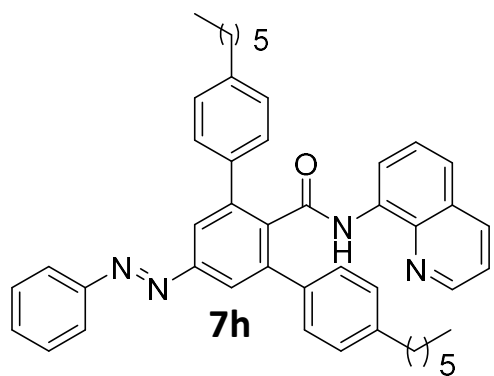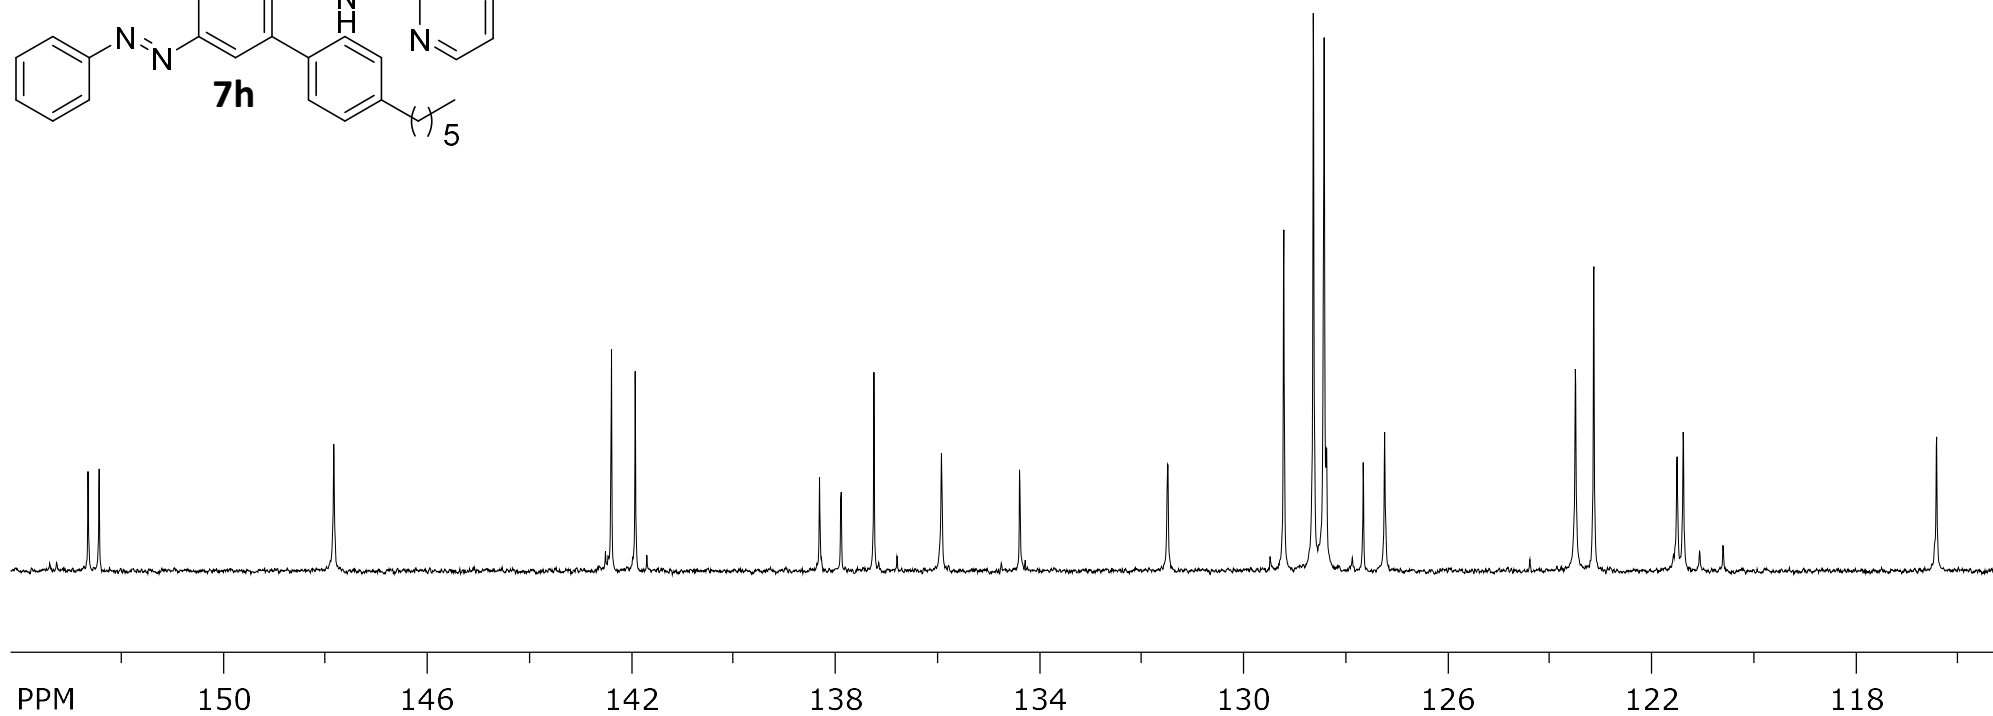



SpinWorks 4: rp-1030b2  
PROTON CDCl3 /opt/topspin3.5pl2/nmrdata nmrsu 13

8.5854  
8.5935  
8.5997  
8.6068  
8.6104  
8.6170  
8.6214  
8.6241  
8.6256  
8.6299  
8.6312

8.3327

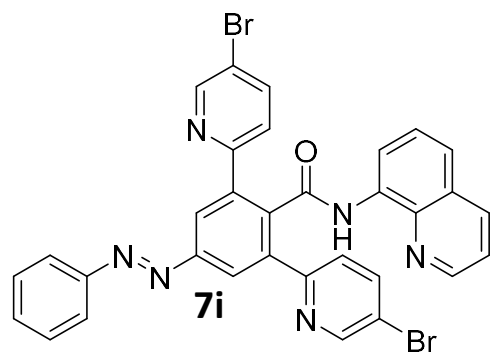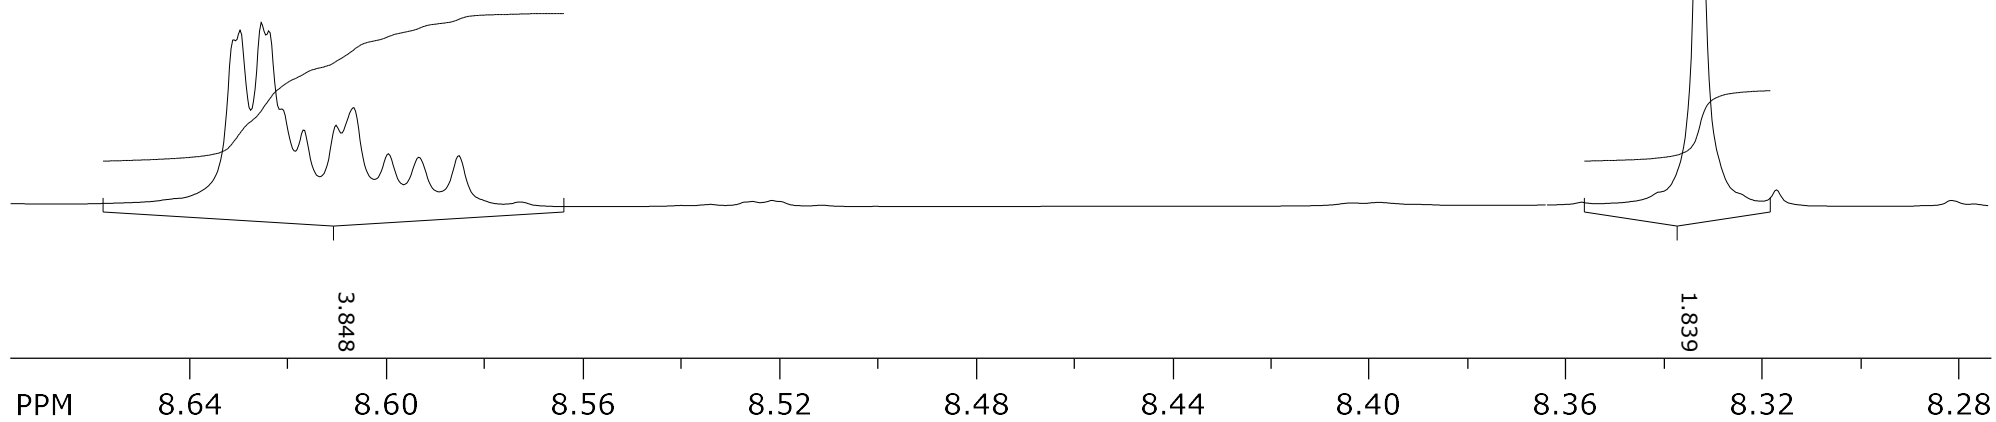



SpinWorks 4: rp-1030b2  
PROTON CDCl3 /opt/topspin3.5pl2/nmrdata nmrsu 13

8.1233  
8.1274

8.1026  
8.1067

8.0133  
8.0180

7.9938  
7.9975

7.7684  
7.7743

7.7474  
7.7533

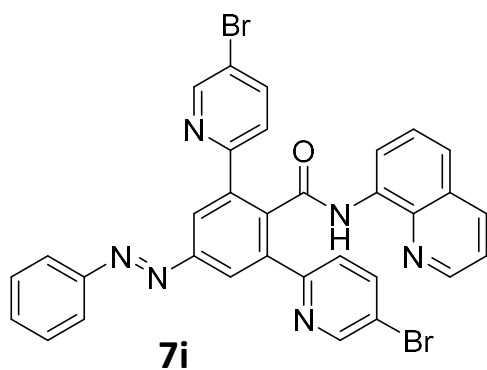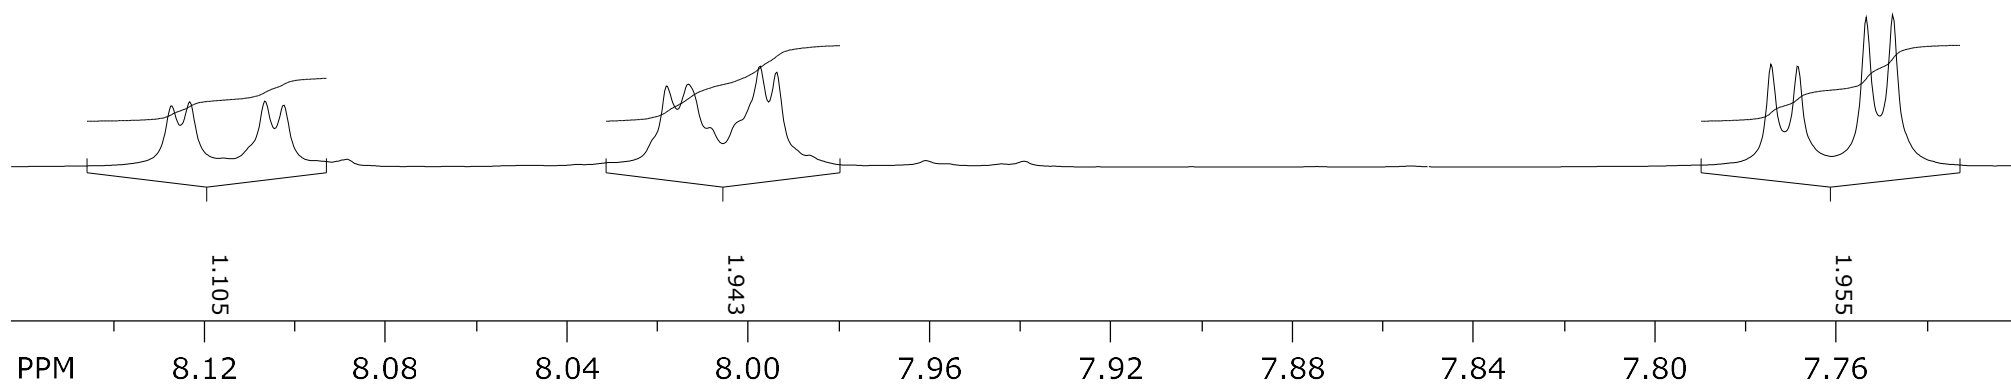

SpinWorks 4: rp-1030b2  
PROTON CDCl3 /opt/topspin3.5pl2/nmrdata nmrsu 13

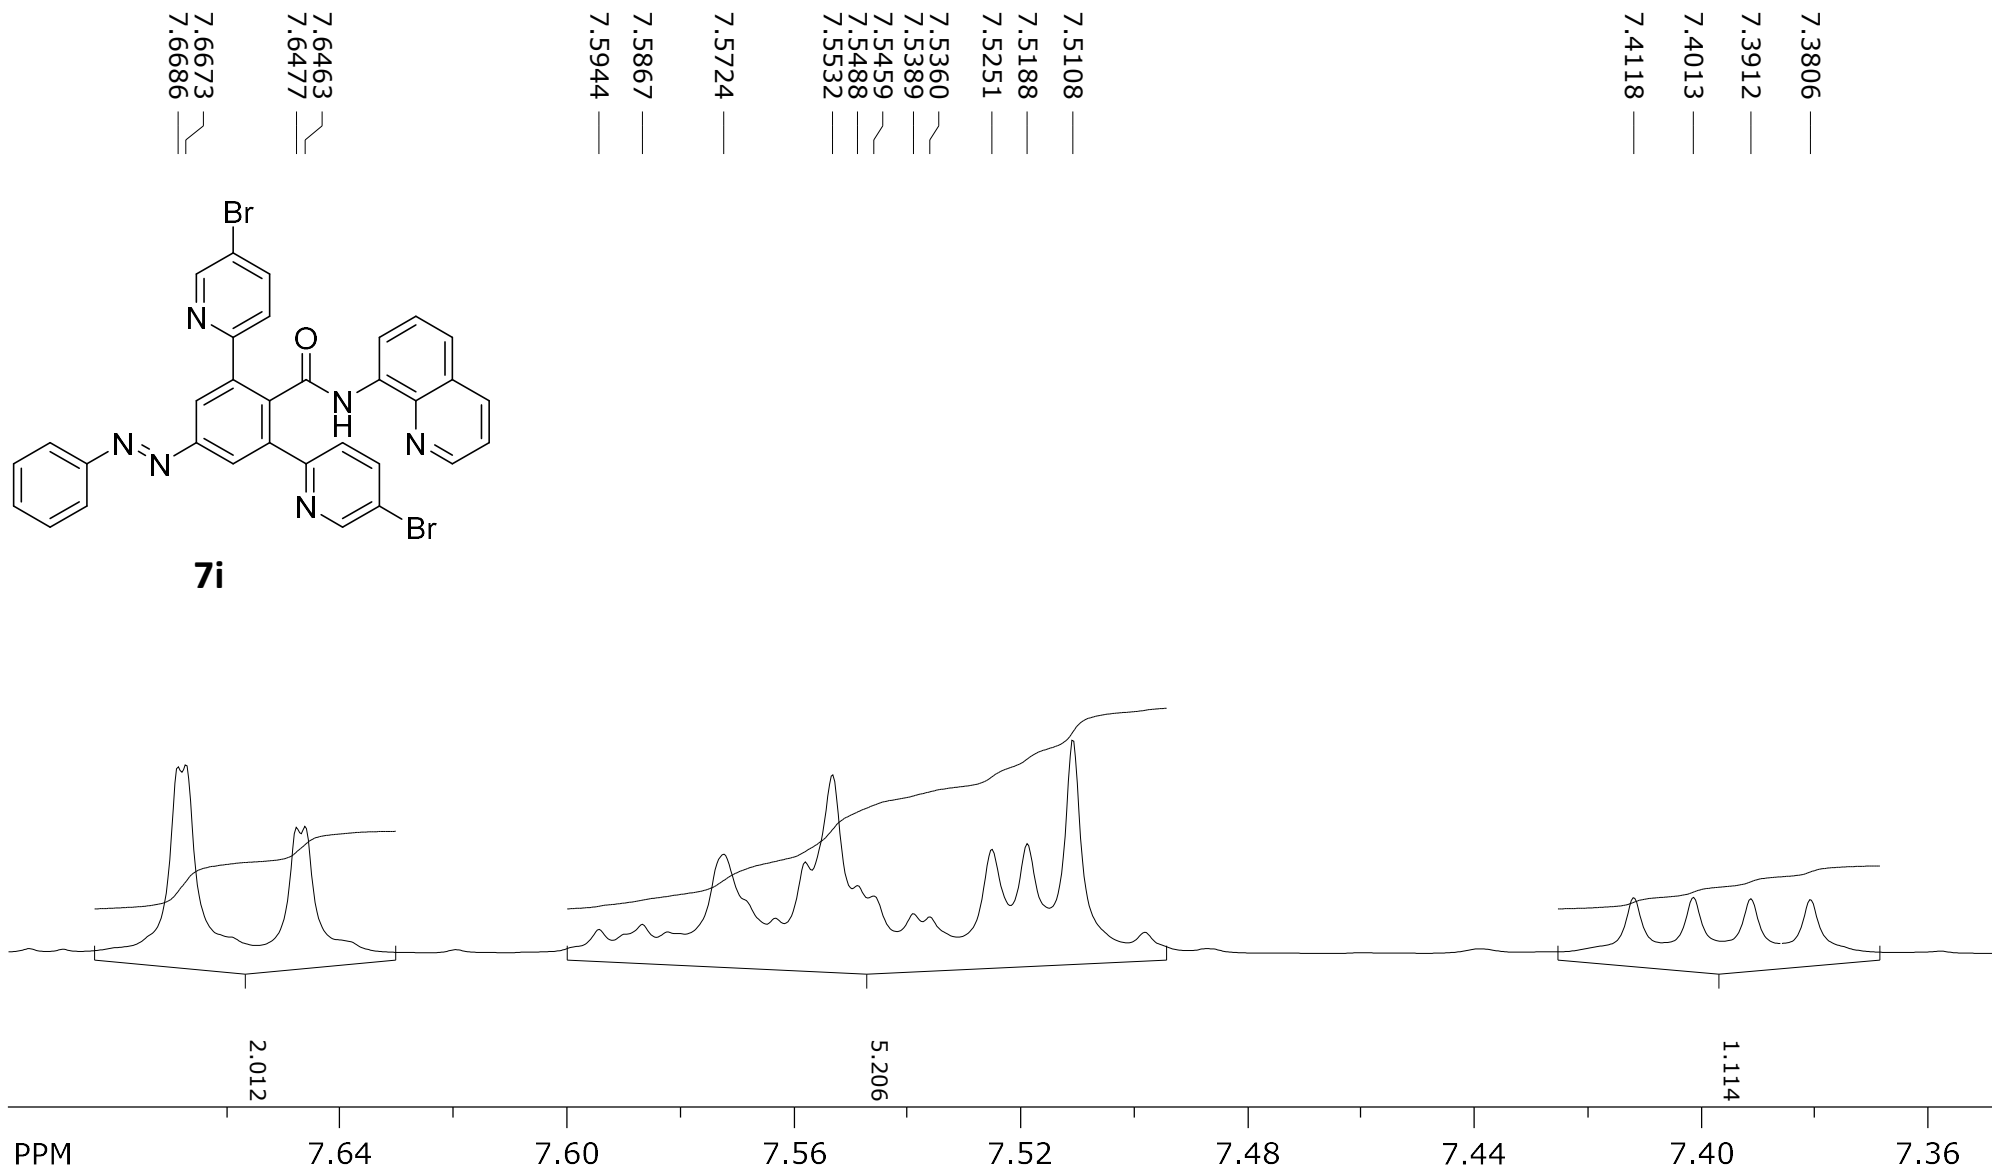



SpinWorks 4: SS-951 Rep  
PROTON CDCl3 /opt/topspin3.5pl2/nmrdata nmrsu 5

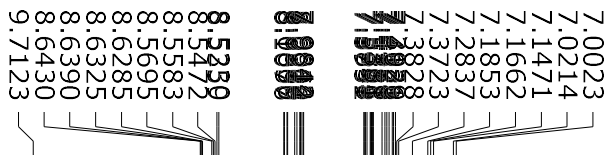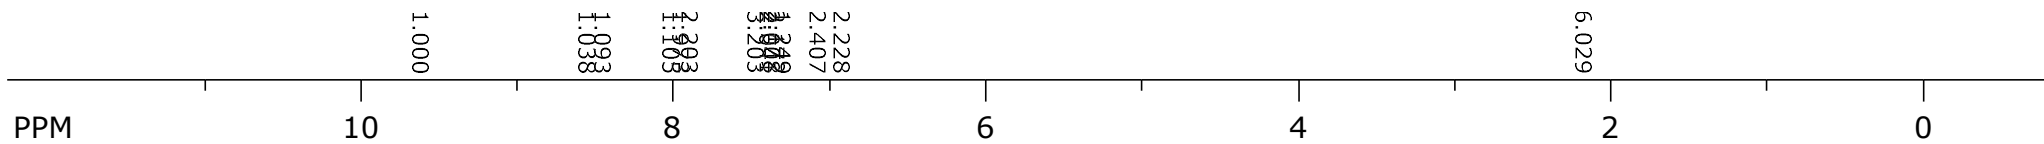

SpinWorks 4: SS-951 Rep  
PROTON CDCl3 /opt/topspin3.5pl2/nmrdata nmrsu 5

8.6285  
8.6325  
8.6390  
8.6430

8.5230  
8.5359  
8.5472  
8.5583  
8.5695

8.0830  
8.0869  
8.1037  
8.1076

7.9812  
7.9844  
7.9962  
8.0009  
8.0052  
8.0226  
8.0367

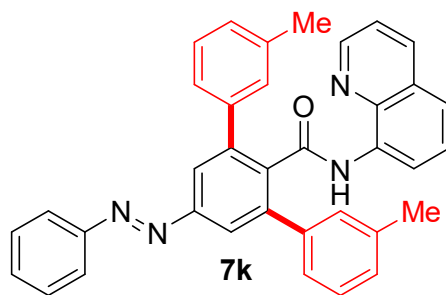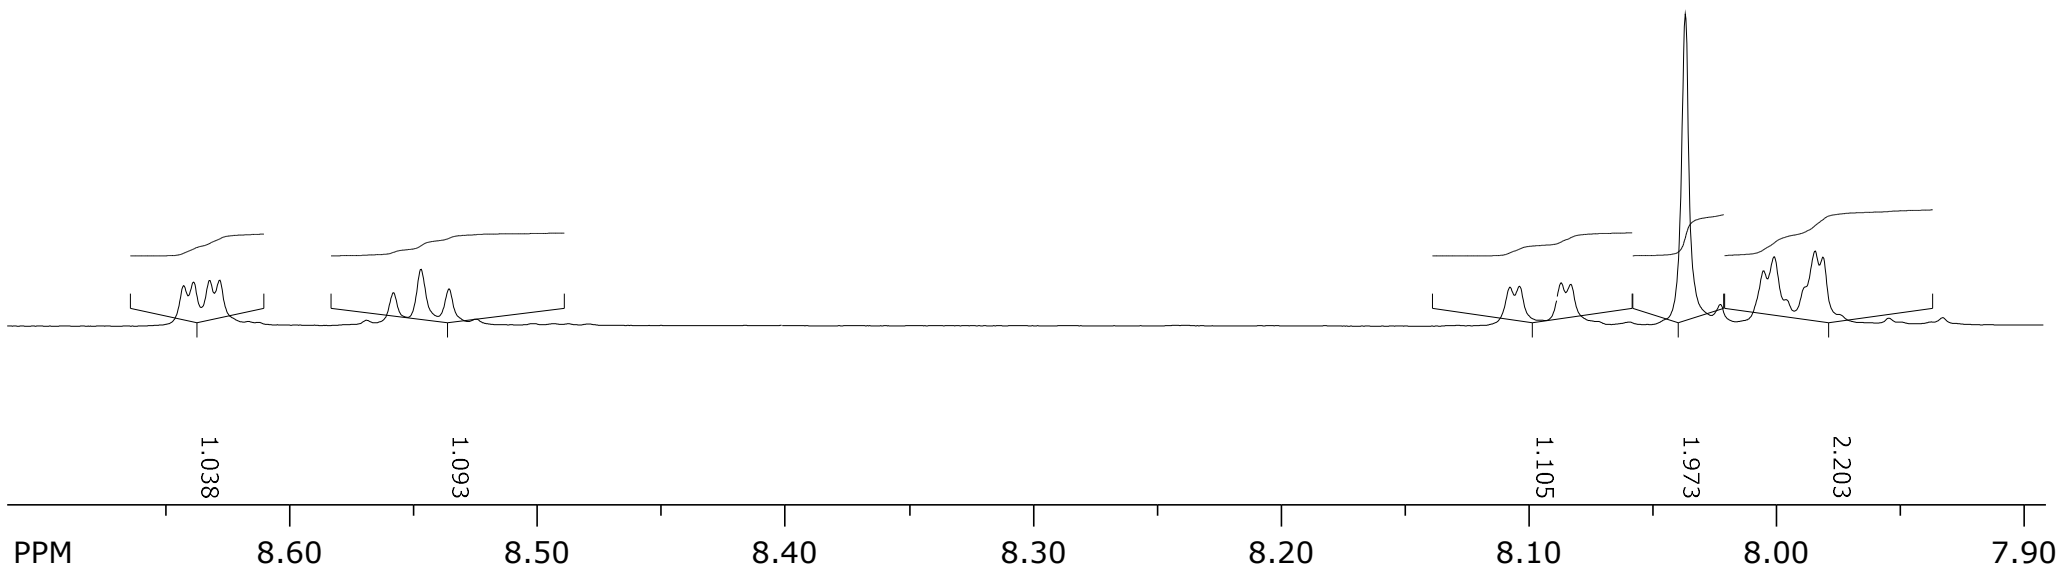

SpinWorks 4: SS-951 Rep  
PROTON CDCl3 /opt/topspin3.5pl2/nmrdata nmrsu 5

7.53331  
7.54403  
7.54556  
7.54993  
7.55444  
7.57335  
7.58448  
7.58994  
7.59552

7.47776  
7.44774  
7.45888  
7.43228  
7.41331  
7.40336  
7.39229  
7.38228  
7.37223

7.28337

7.18553  
7.16662  
7.14771

7.02114  
7.00223

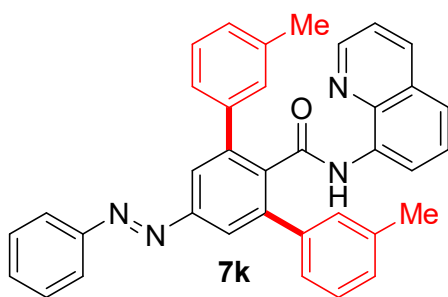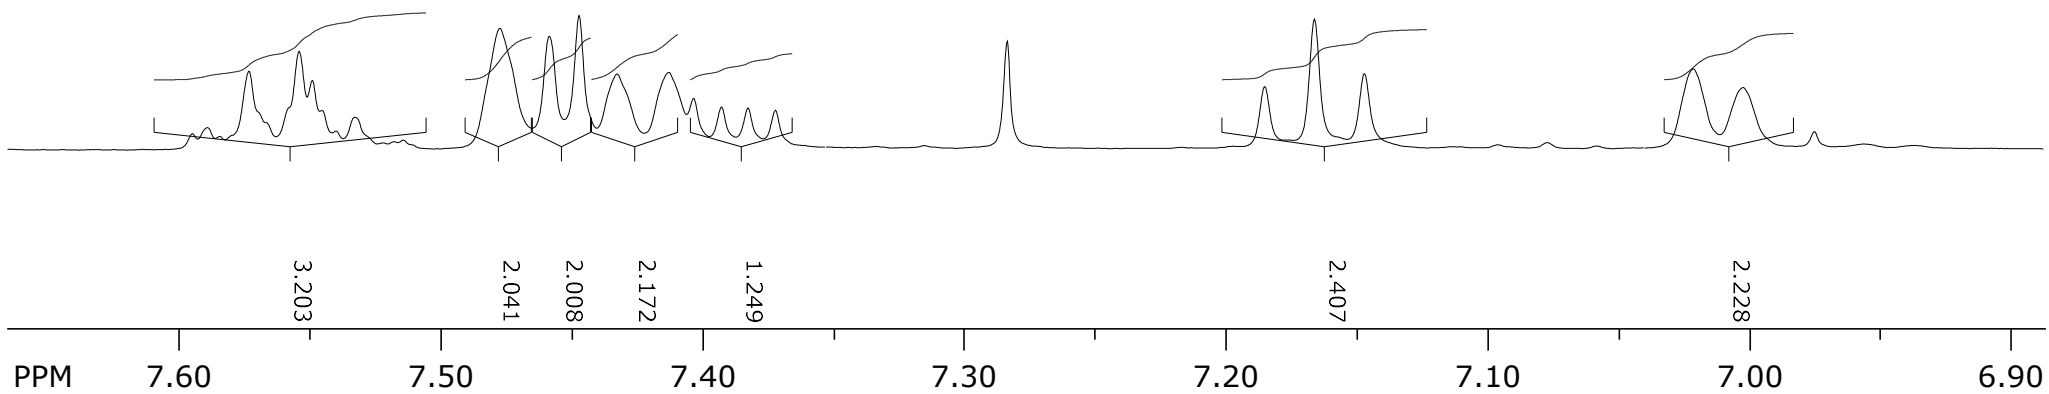

SpinWorks 4: SS-951 Rep  
C13CPD256 CDCl3 /opt/topspin3.5pl2/nmrdata nmrsu 5

116.442  
121.381  
121.541  
123.097  
123.478  
125.695  
127.227  
127.651  
129.189  
129.189  
131.492  
134.240  
136.028  
137.861  
137.898  
138.319  
139.796  
141.927  
147.849  
152.332  
152.595  
167.138

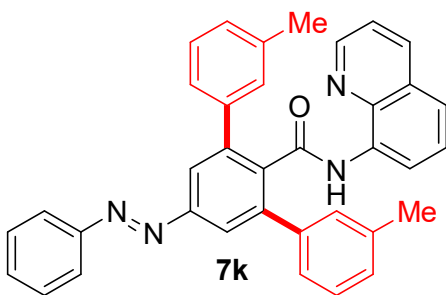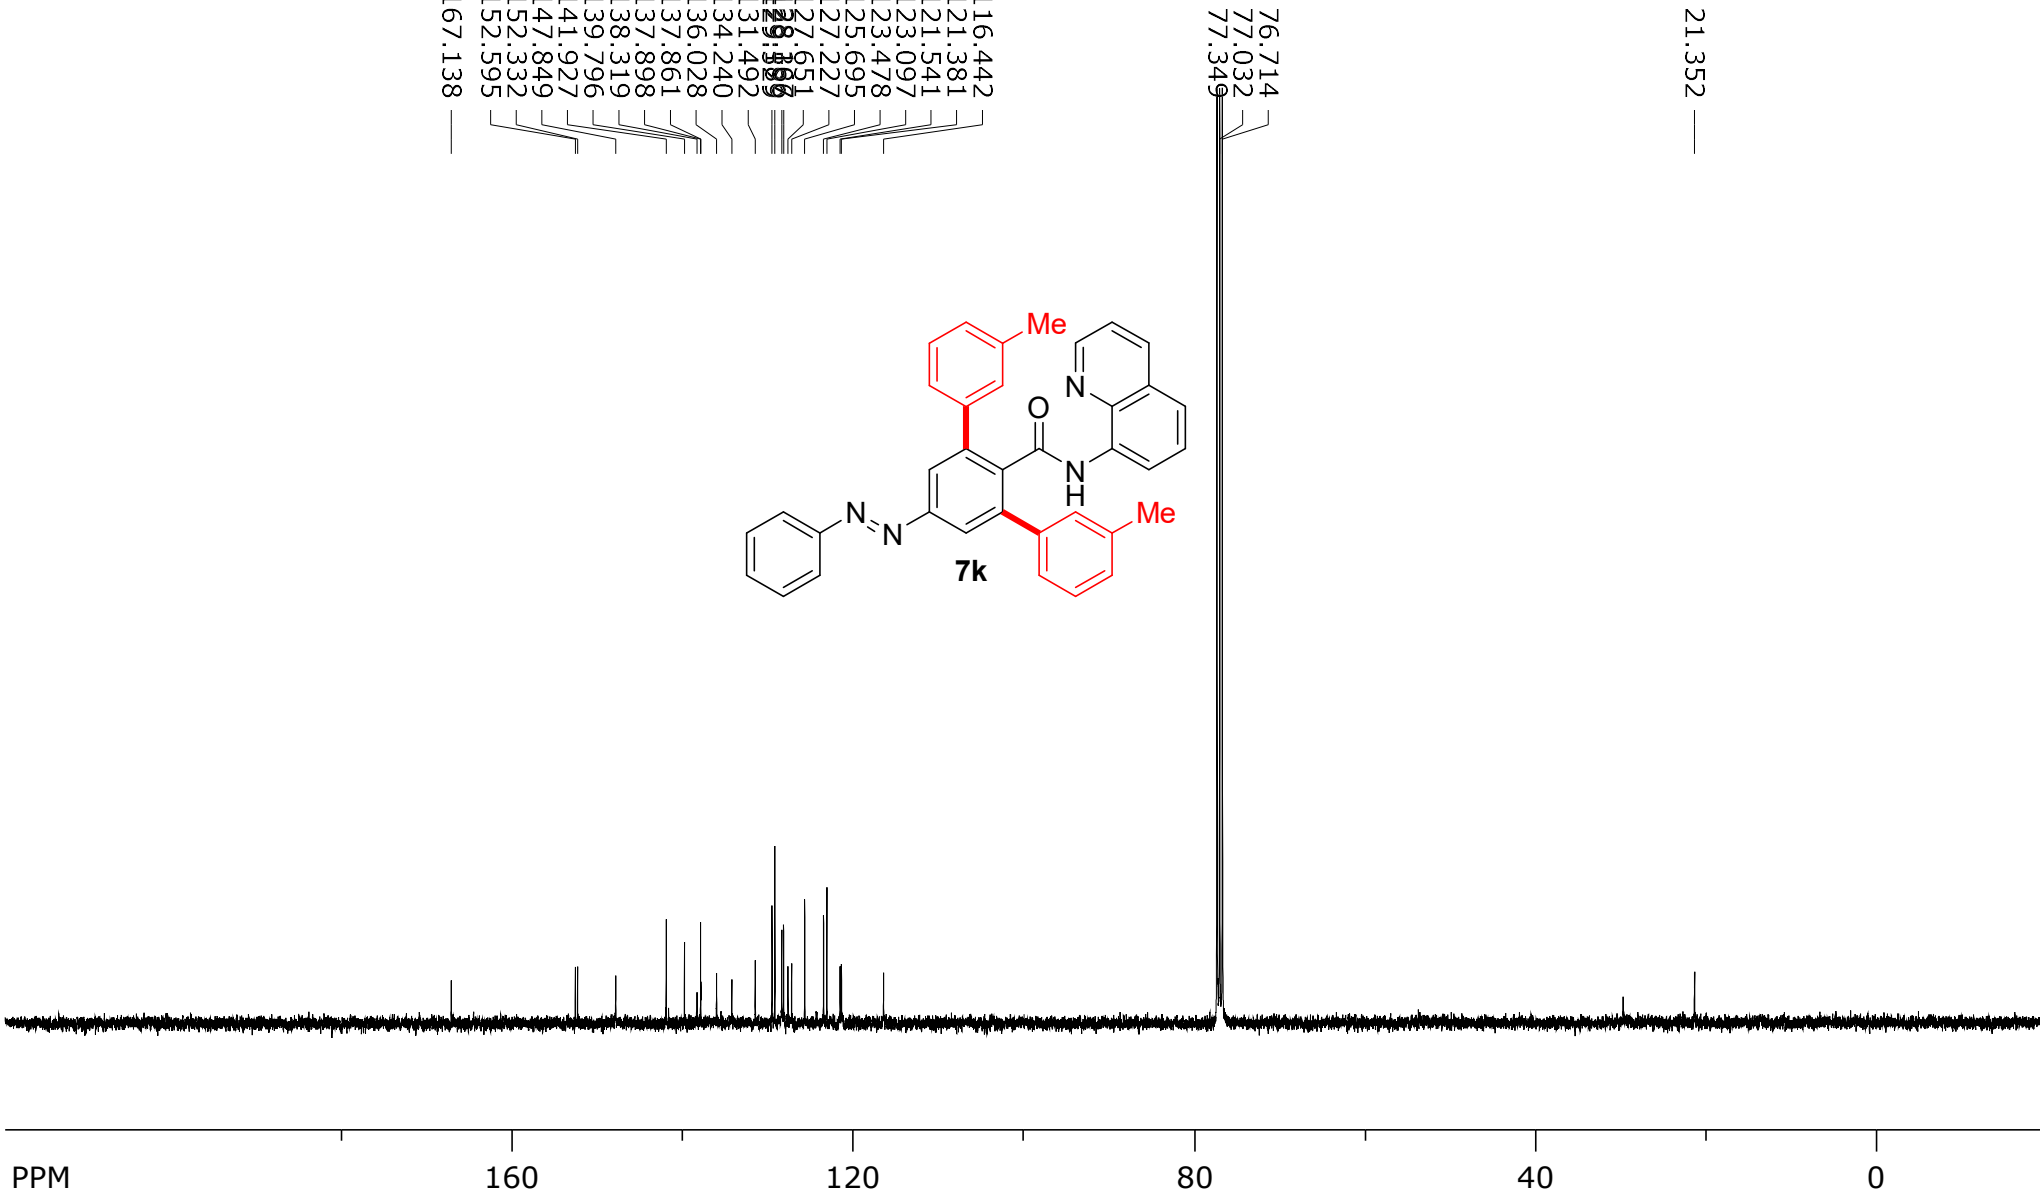

PPM

160

120

80

40

0





SpinWorks 4: SS-951 Rep  
C13CPD256 CDCl3 /opt/topspin3.5pl2/nmrdata nmrsu 5

137.861  
137.898  
138.319

136.028

134.240

131.492

129.189  
129.529

128.167  
128.386

127.227  
127.651

125.695

123.097  
123.478

121.381  
121.541

116.442

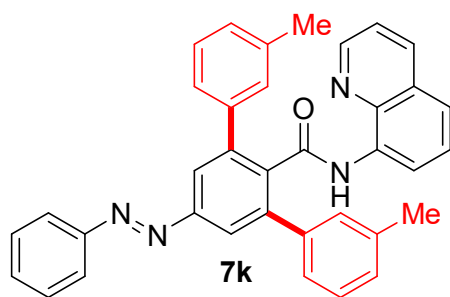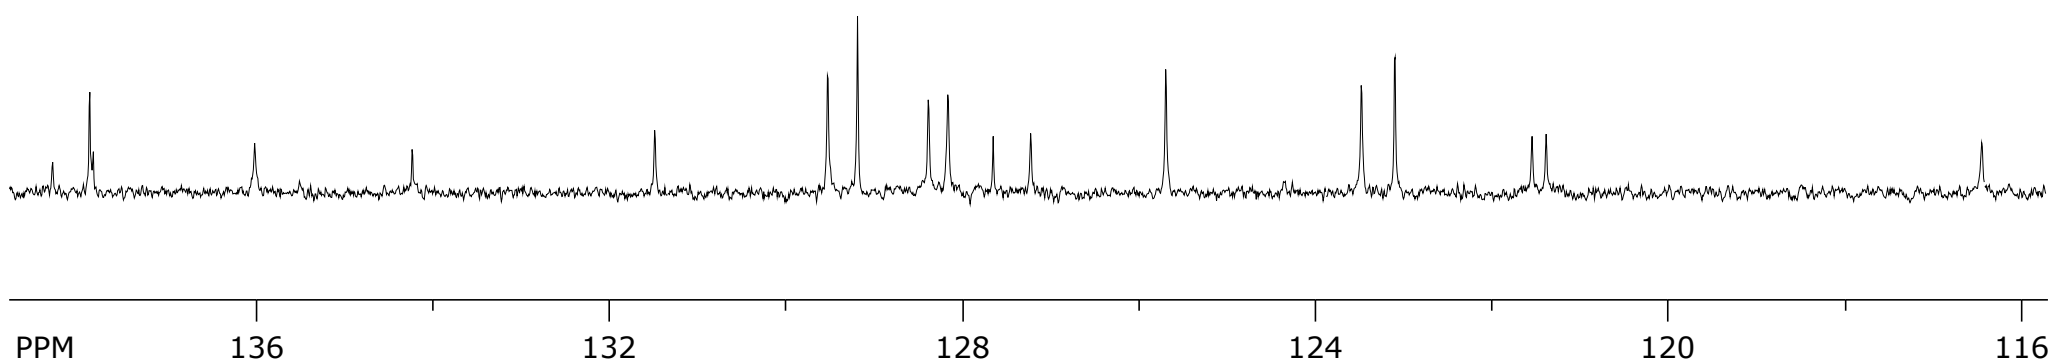

SpinWorks 4: SS-954  
PROTON CDCl3 /opt/topspin3.5pl2/nmrdata nmrsu 26

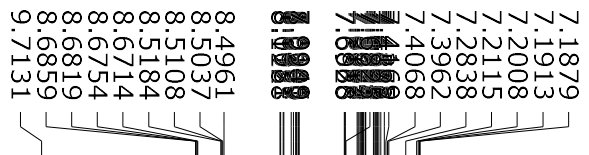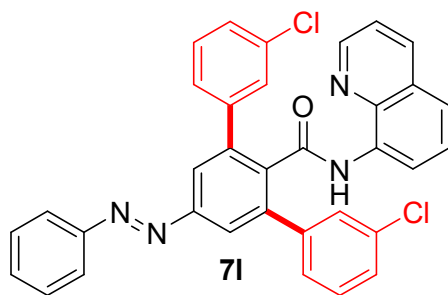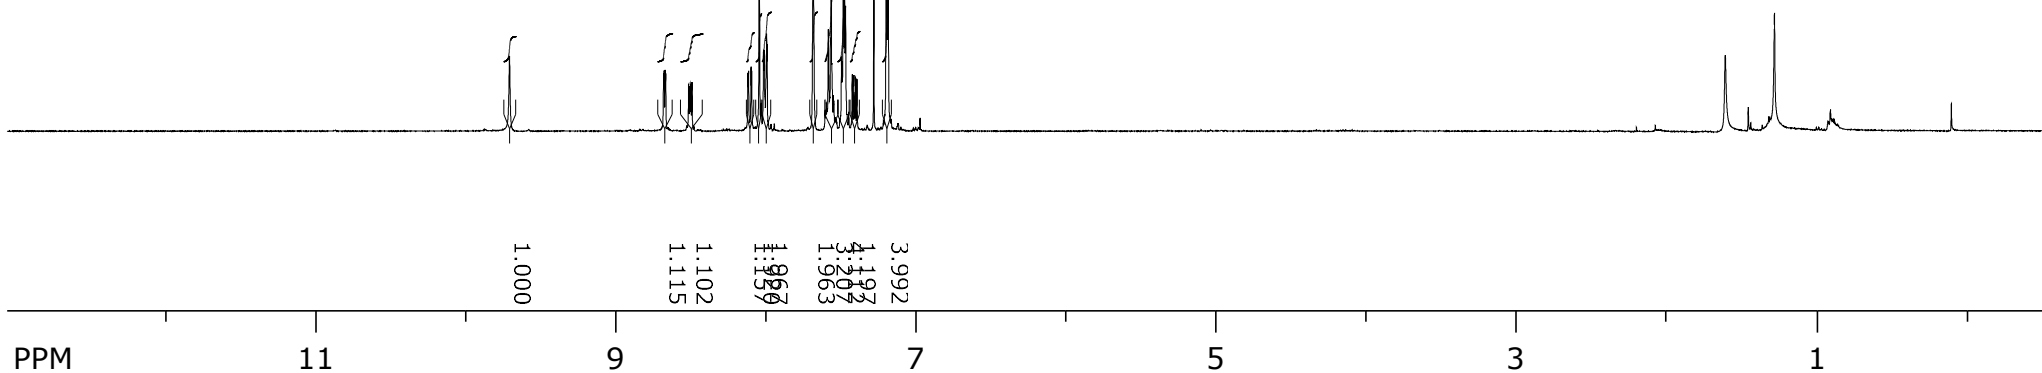

SpinWorks 4: SS-954  
PROTON CDCl3 /opt/topspin3.5pl2/nmrdata nmrsu 26

8.6714  
8.6754  
8.6819  
8.6859

8.4961  
8.5037  
8.5108  
8.5184

8.0981  
8.1021  
8.1188  
8.1228

7.9949  
7.9985  
8.0096  
8.0143  
8.0190  
8.0339  
8.0471

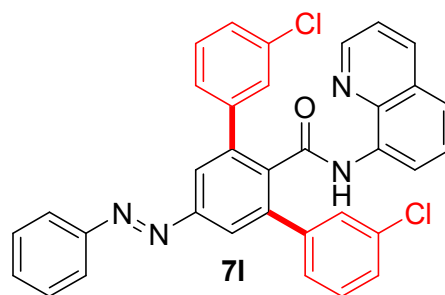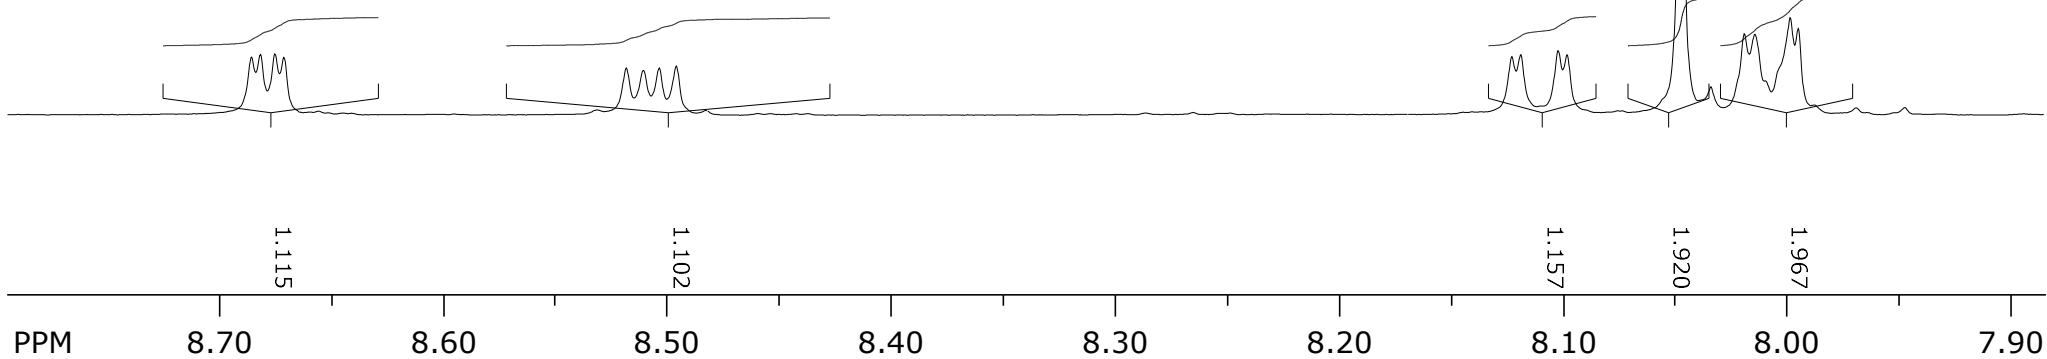

SpinWorks 4: SS-954  
PROTON CDCl3 /opt/topspin3.5pl2/nmrdata nmrsu 26

7.6825 —  
7.6866 —  
7.6886 —  
7.6928 —

7.5507 —  
7.5534 —  
7.5635 —  
7.5677 —  
7.5724 —  
7.5775 —  
7.5869 —  
7.5965 —  
7.6012 —  
7.6088 —

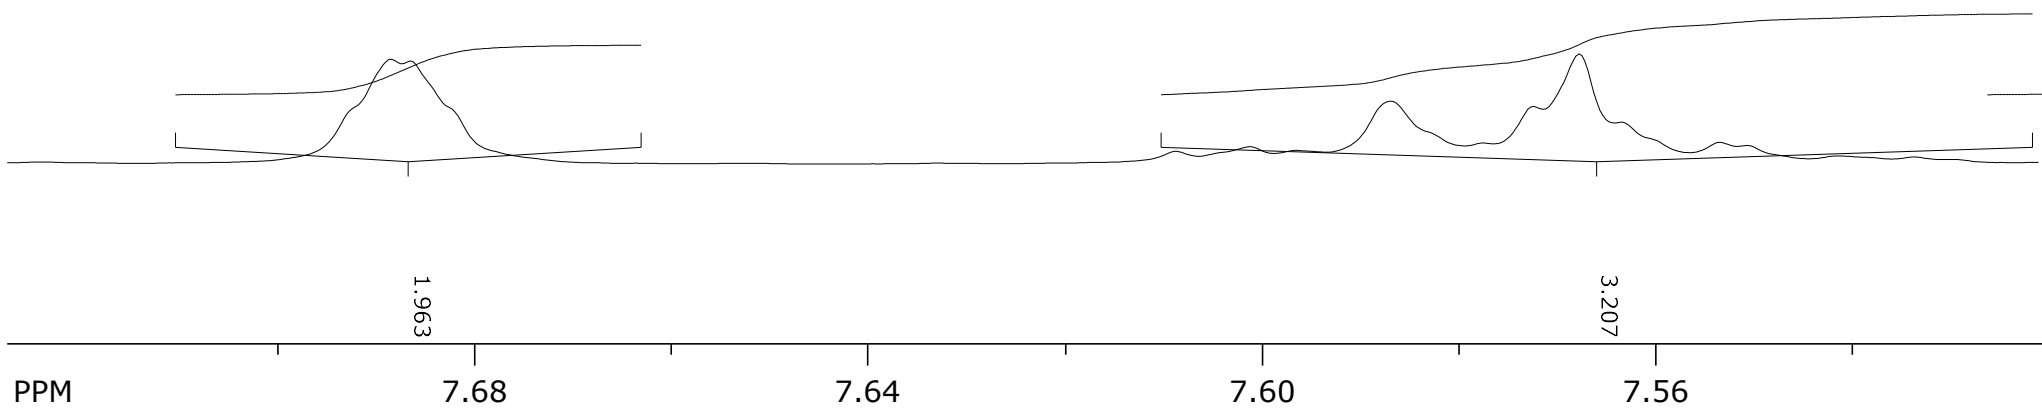

SpinWorks 4: SS-954  
PROTON CDCl3 /opt/topspin3.5pl2/nmrdata nmrsu 26

7.4994  
7.4951  
7.4863  
7.4783  
7.4723  
7.4626  
7.4508  
7.4275  
7.4169  
7.4068  
7.3962

7.2838

7.2115  
7.2008  
7.1913  
7.1879

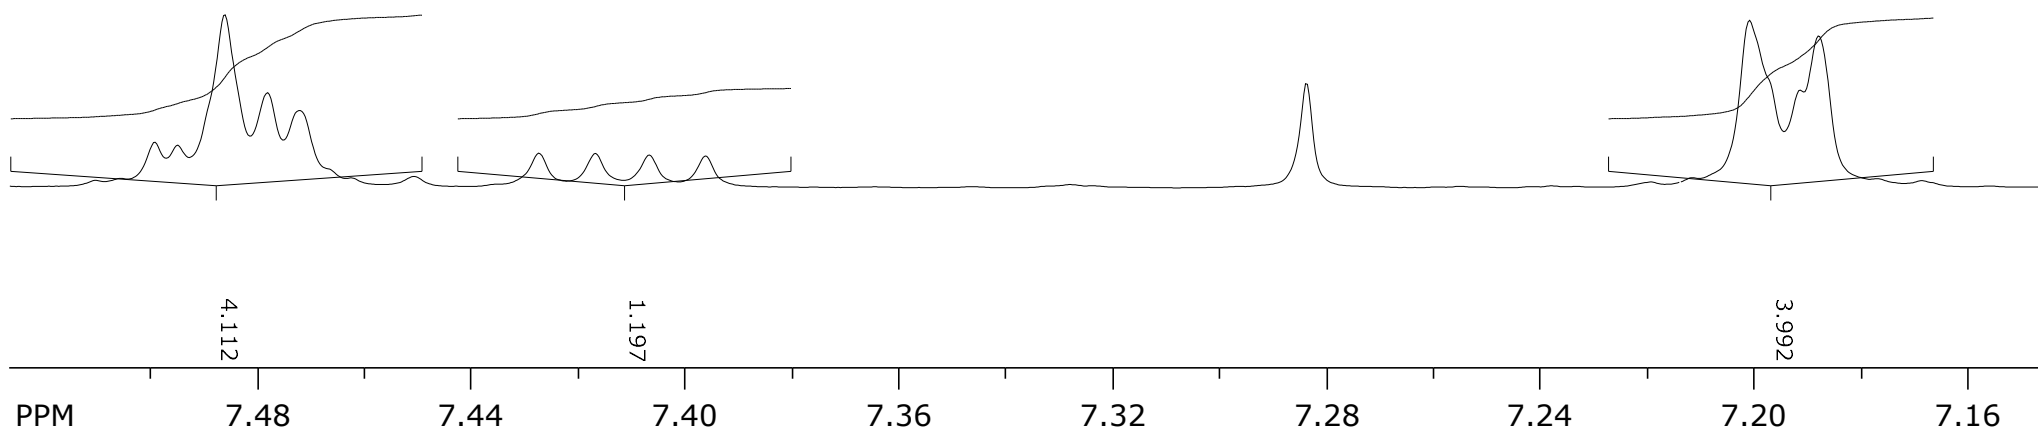

SpinWorks 4: SS-954

C13CPD256 CDCl3 /opt/topspin3.5pl2/nmrdata nmrsu 38

116.699  
121.559  
122.018  
123.206  
123.883  
126.849  
127.166  
127.667  
129.819  
131.816  
133.773  
134.331  
136.104  
137.638  
138.275  
140.536  
141.379  
148.185  
152.415  
152.478  
166.193

76.729  
77.046  
77.364

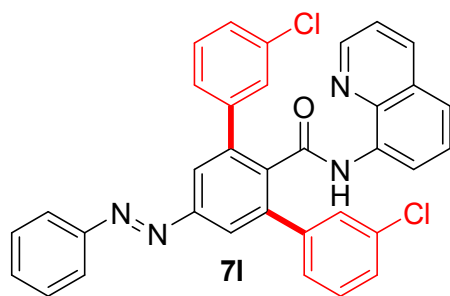

PPM

160

120

80

40

0

SpinWorks 4: SS-954

C13CPD256 CDCl3 /opt/topspin3.5pl2/nmrdata nmrsu 38

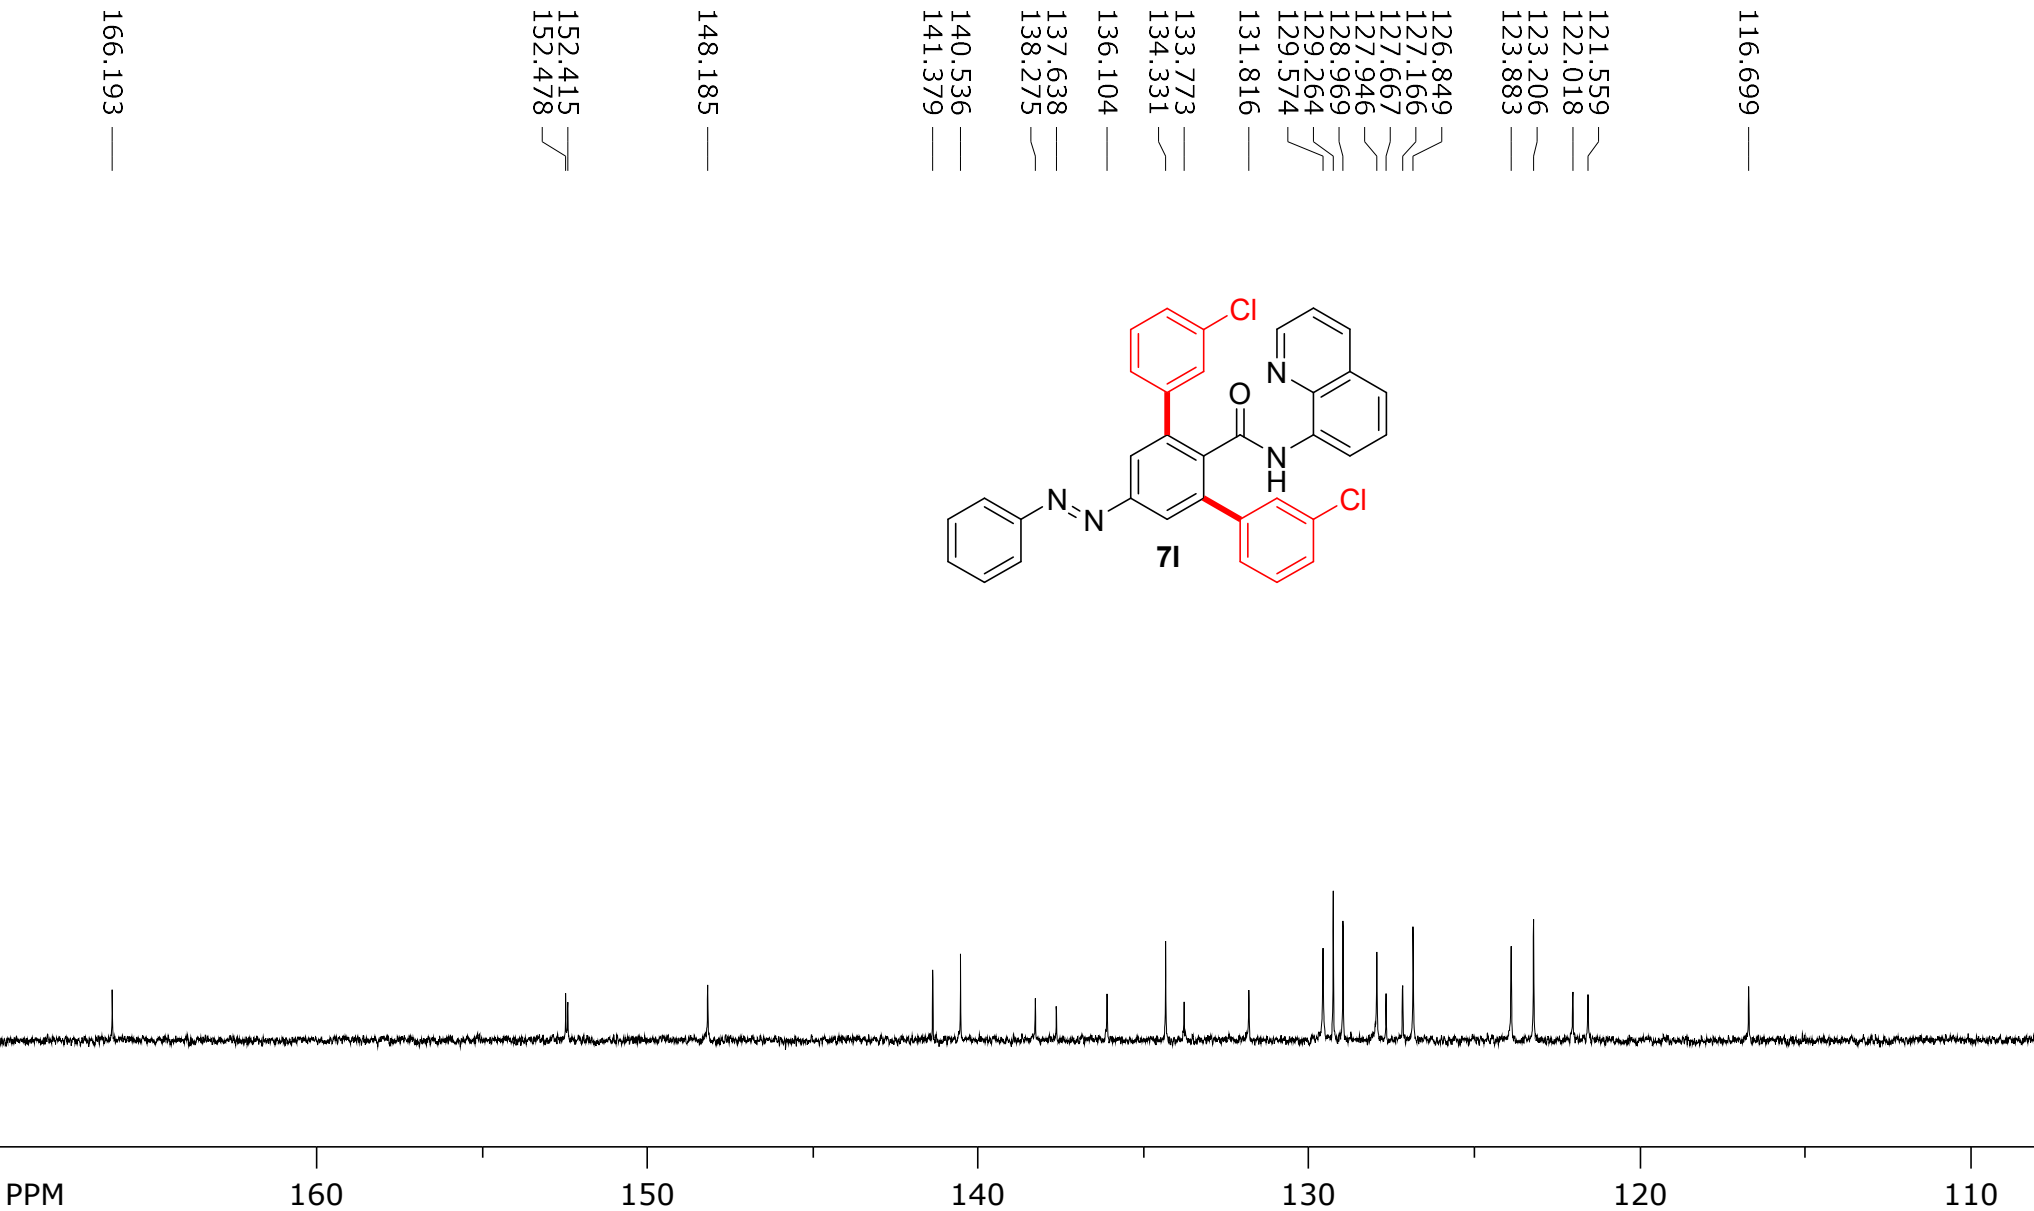





SpinWorks 4: SAB 210702  
1H\_8scan CDCl3 {D:\Spectra} nmr 2

8.7862  
8.7886  
8.8013  
8.8037

8.5280  
8.5313  
8.5364  
8.5396

8.0034  
8.0066  
8.0173  
8.0199  
8.0232  
8.0369  
8.0403

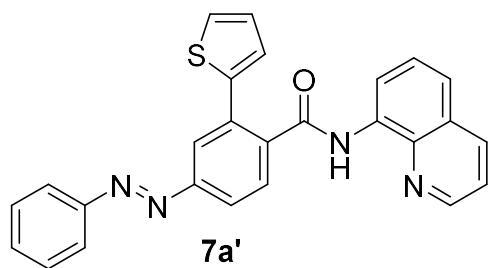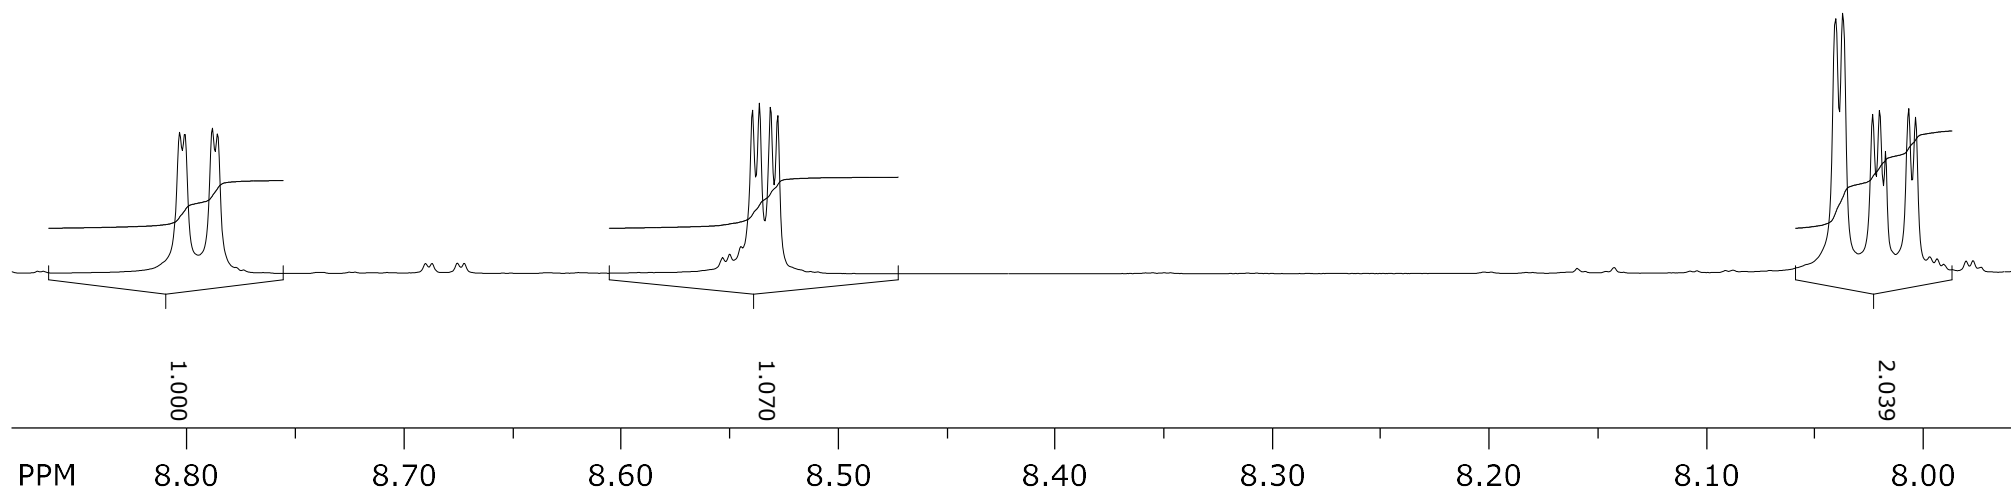

SpinWorks 4: SAB 210702  
1H\_8scan CDCl3 {D:\Spectra} nmr 2

7.8624  
7.8743  
7.8784  
7.8906  
7.8919  
7.8956  
7.9083  
7.9120

7.4050  
7.4077  
7.4217  
7.4245  
7.4297  
7.4328  
7.4360  
7.4409  
7.4559  
7.4725  
7.4882

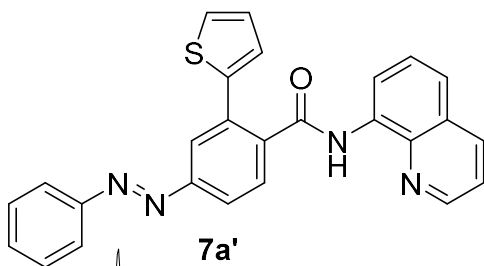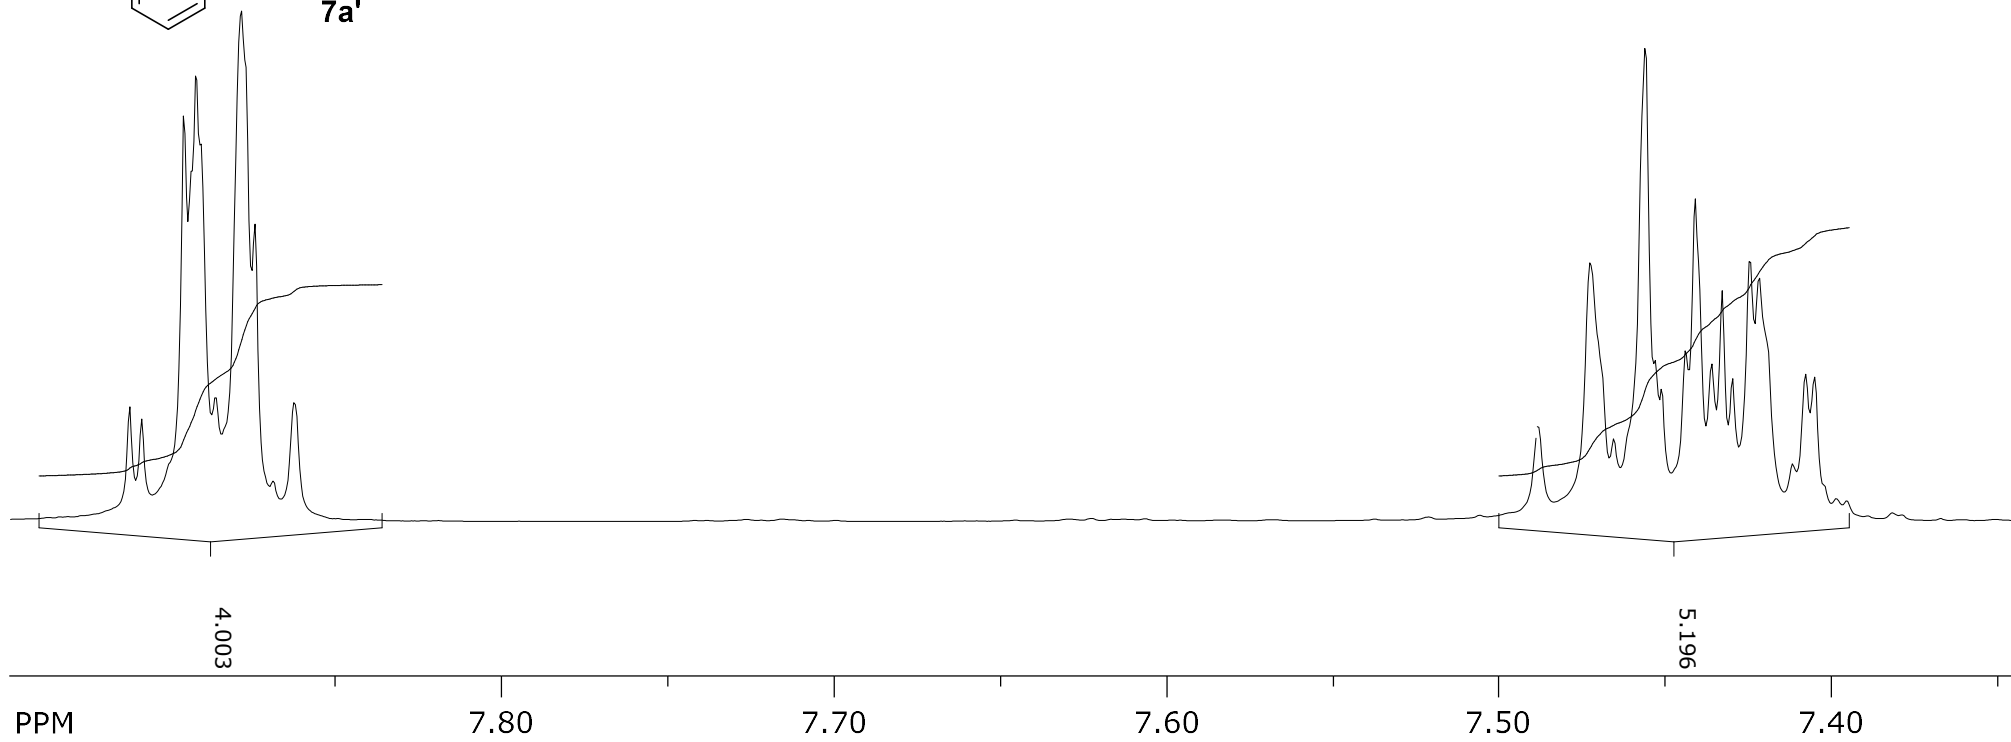

SpinWorks 4: SAB 210702  
1H\_8scan CDCl3 {D:\Spectra} nmr 2

7.22747  
7.2831  
7.2912  
7.2996

7.22272  
7.2294  
7.2344  
7.2366

7.1604  
7.1660  
7.1682  
7.1762  
7.1784

6.8290  
6.8362  
6.8464

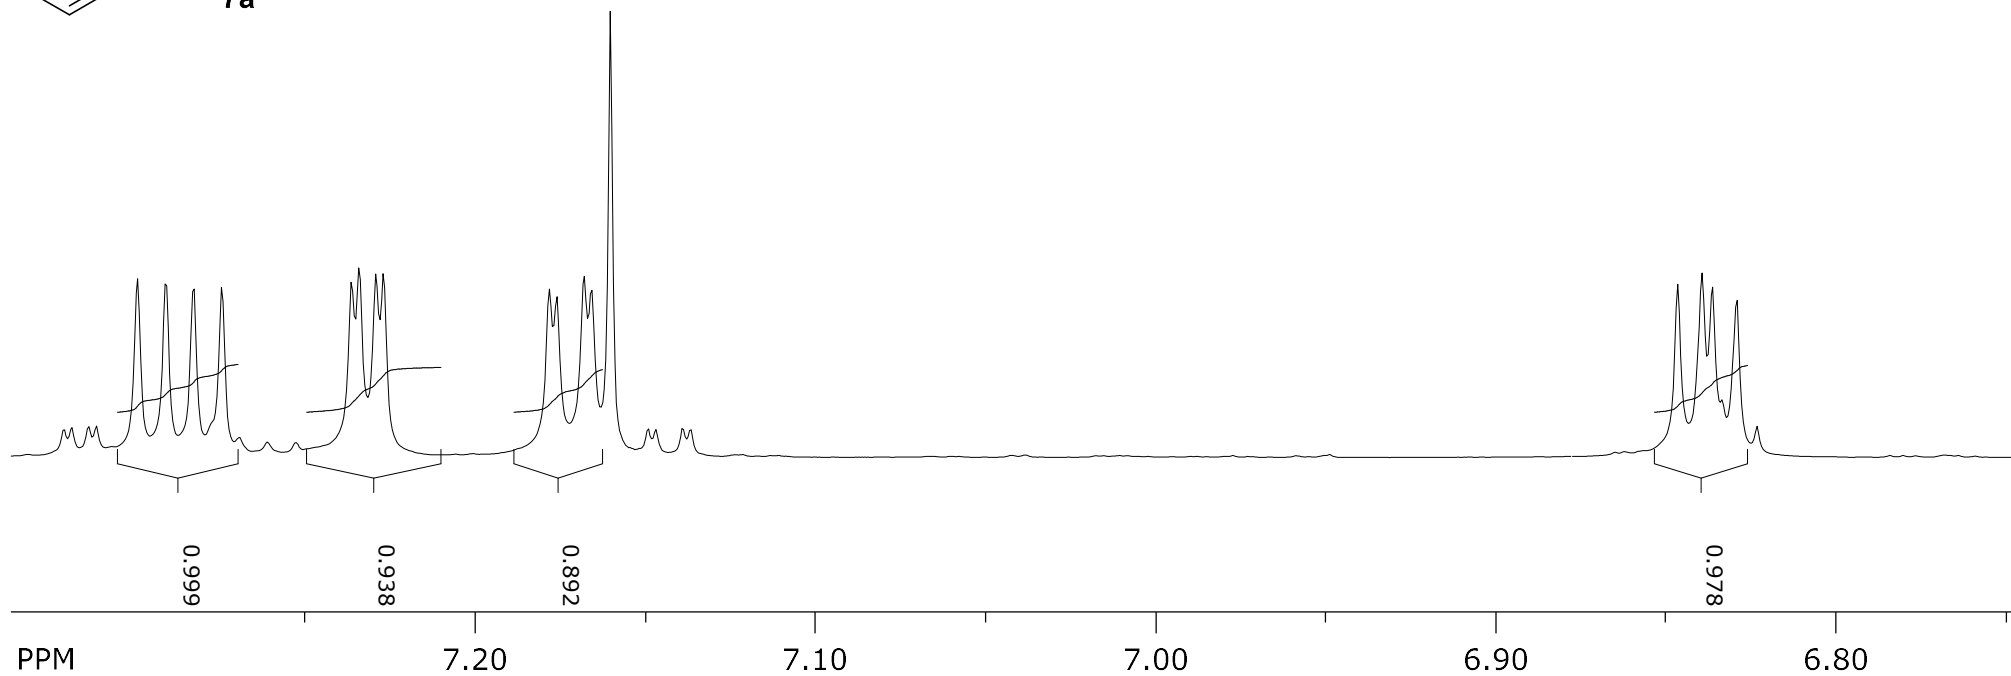

SpinWorks 4: SAB 210702  
C13CPD CDCl3 {D:\Spectra} nmr 2

167.078  
153.258  
152.583  
148.058  
140.427  
138.492  
138.024  
136.144  
134.506  
133.618  
131.659  
130.011  
129.217  
~~127.889~~  
127.357  
126.808  
125.501  
123.178  
121.929  
121.882  
121.605  
116.652

76.811  
77.065  
77.318

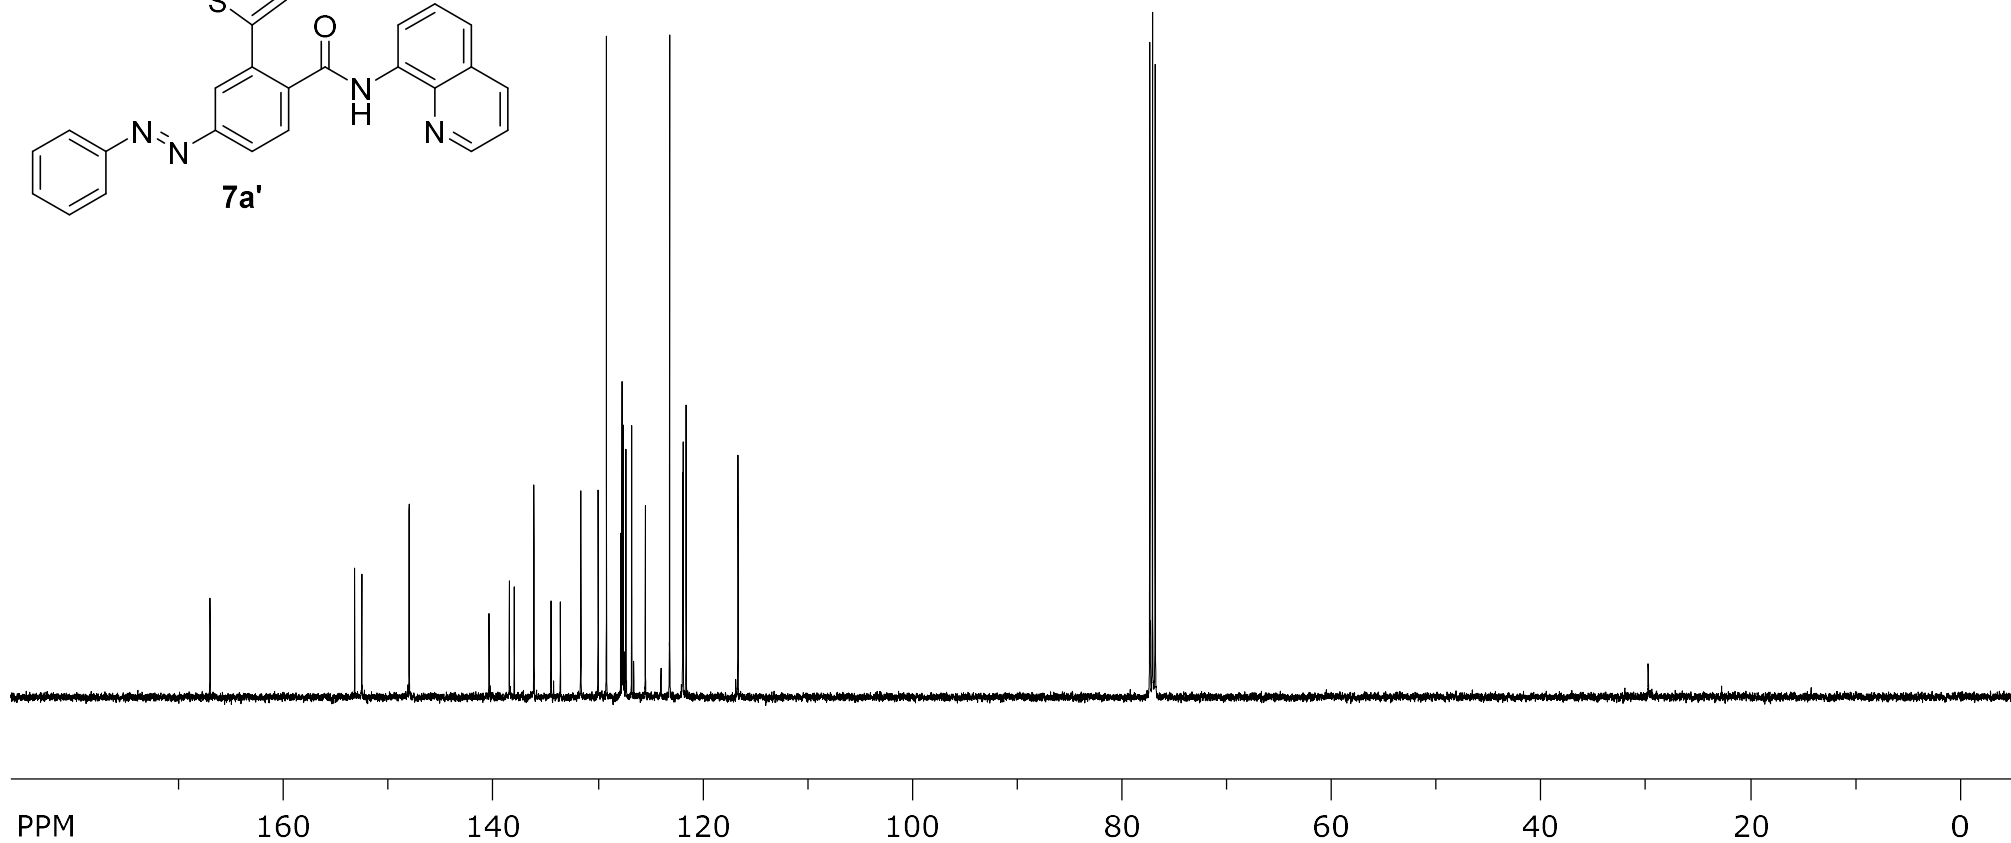

SpinWorks 4: SAB 210702  
C13CPD CDCl3 {D:\Spectra} nmr 2

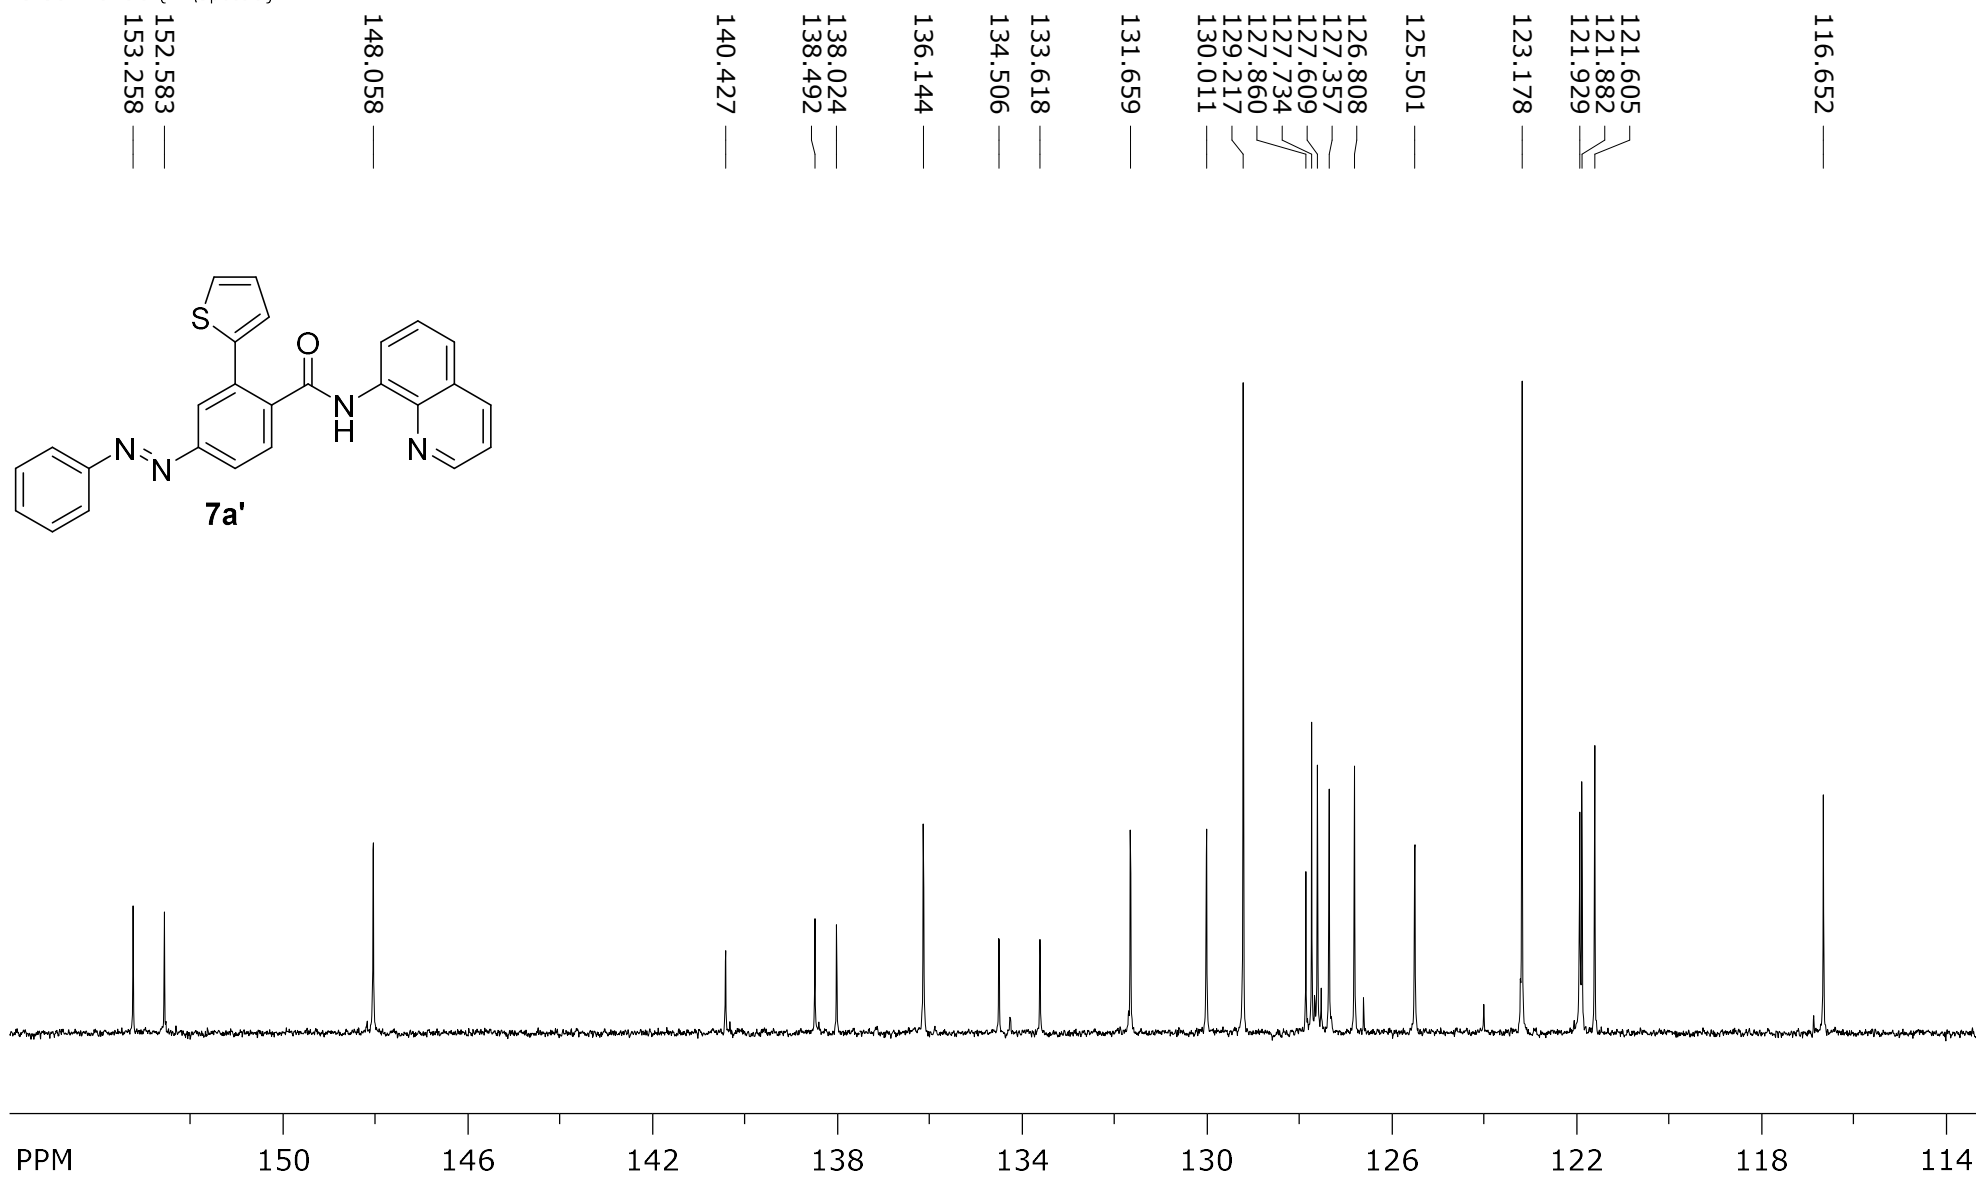

SpinWorks 4: RP 1357 B2  
PROTON CDCl3 /opt/topspin3.5pl2/nmrdata nmrsu 51

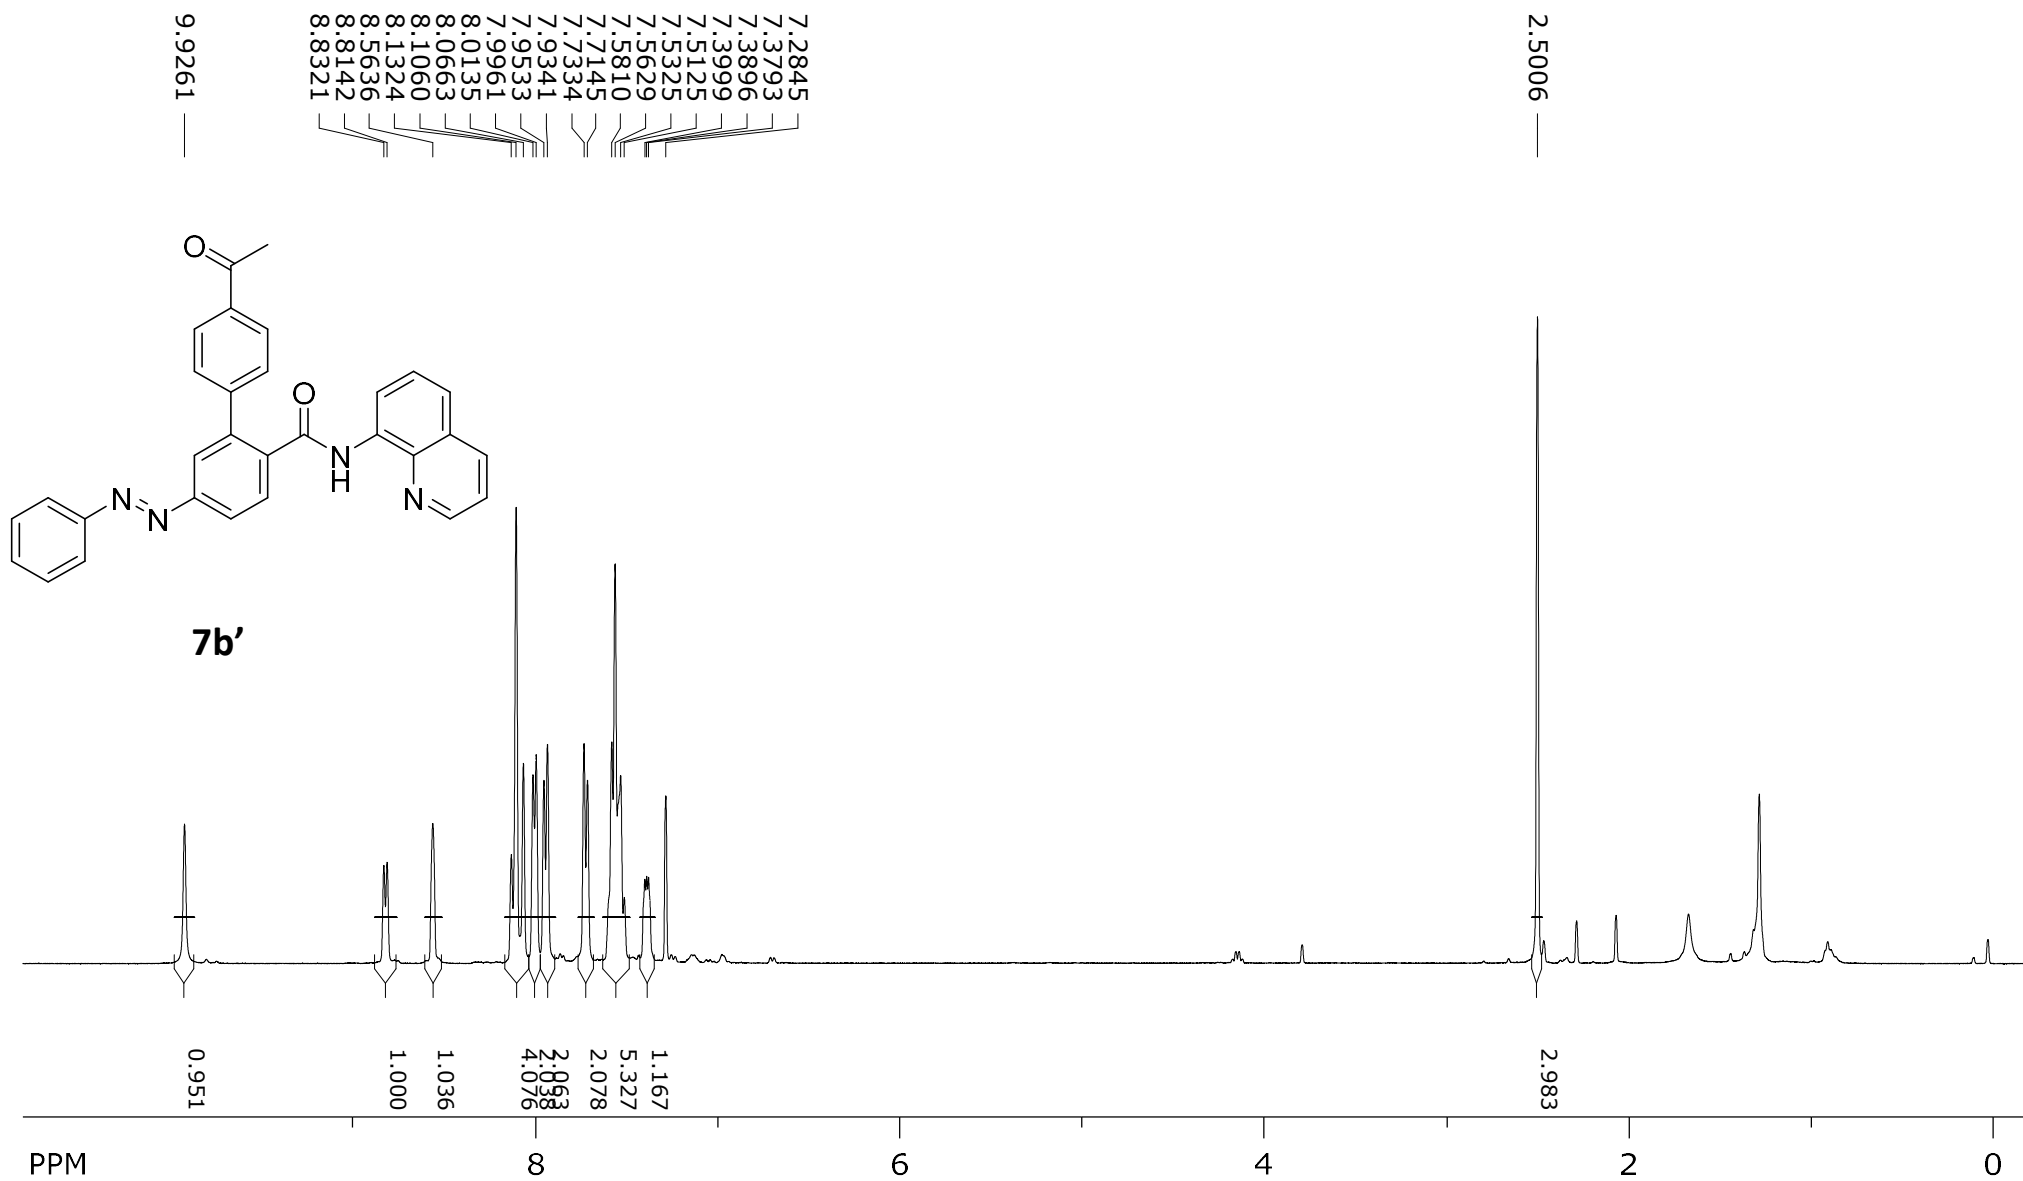

SpinWorks 4: RP 1357 B2  
PROTON CDCl3 /opt/topspin3.5pl2/nmrdata nmrsu 51

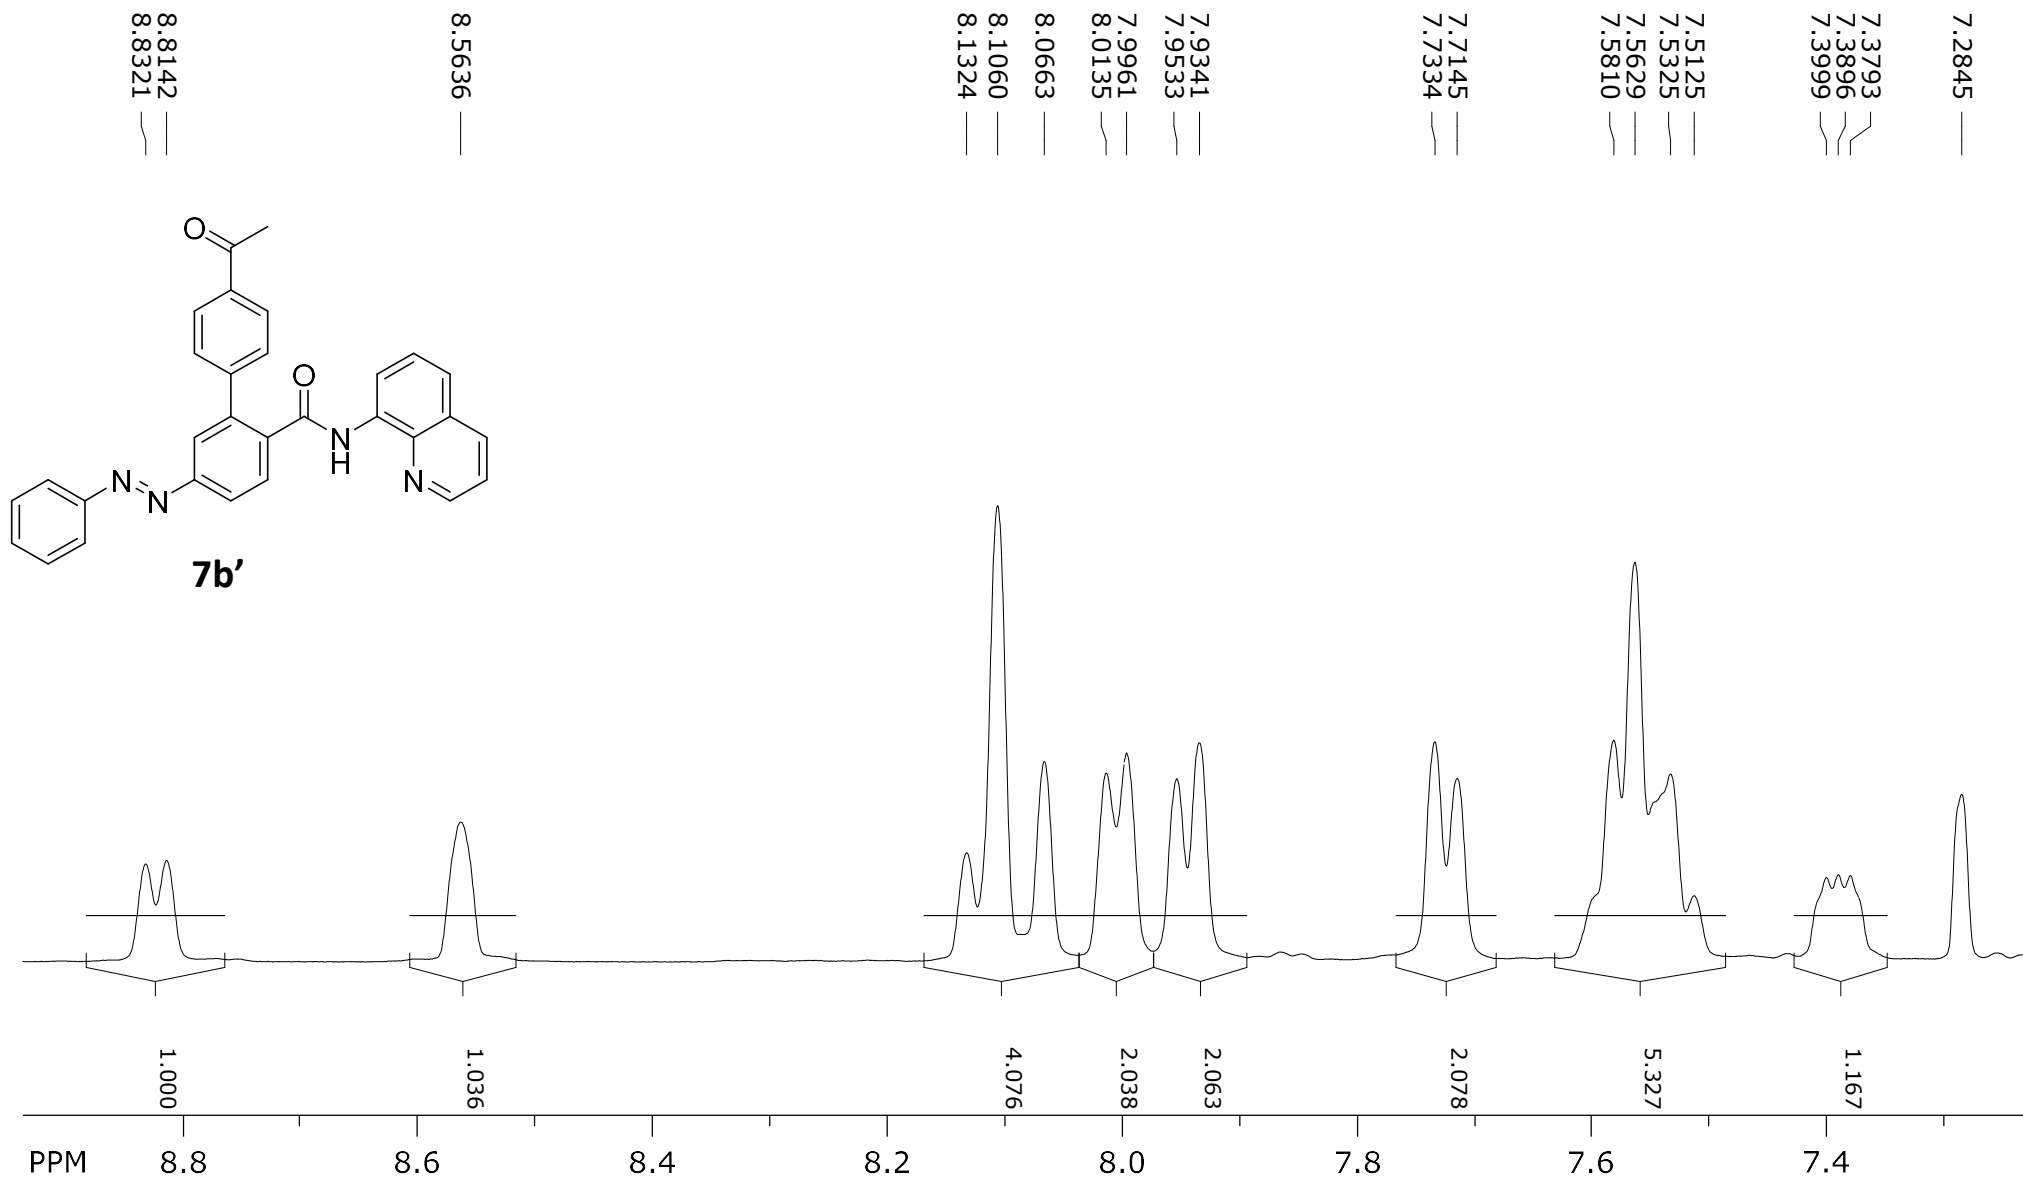

SpinWorks 4: RP 1357 B2  
C13CPD CDCl3 /opt/topspin3.5pl2/nmrdata nmrsu 51

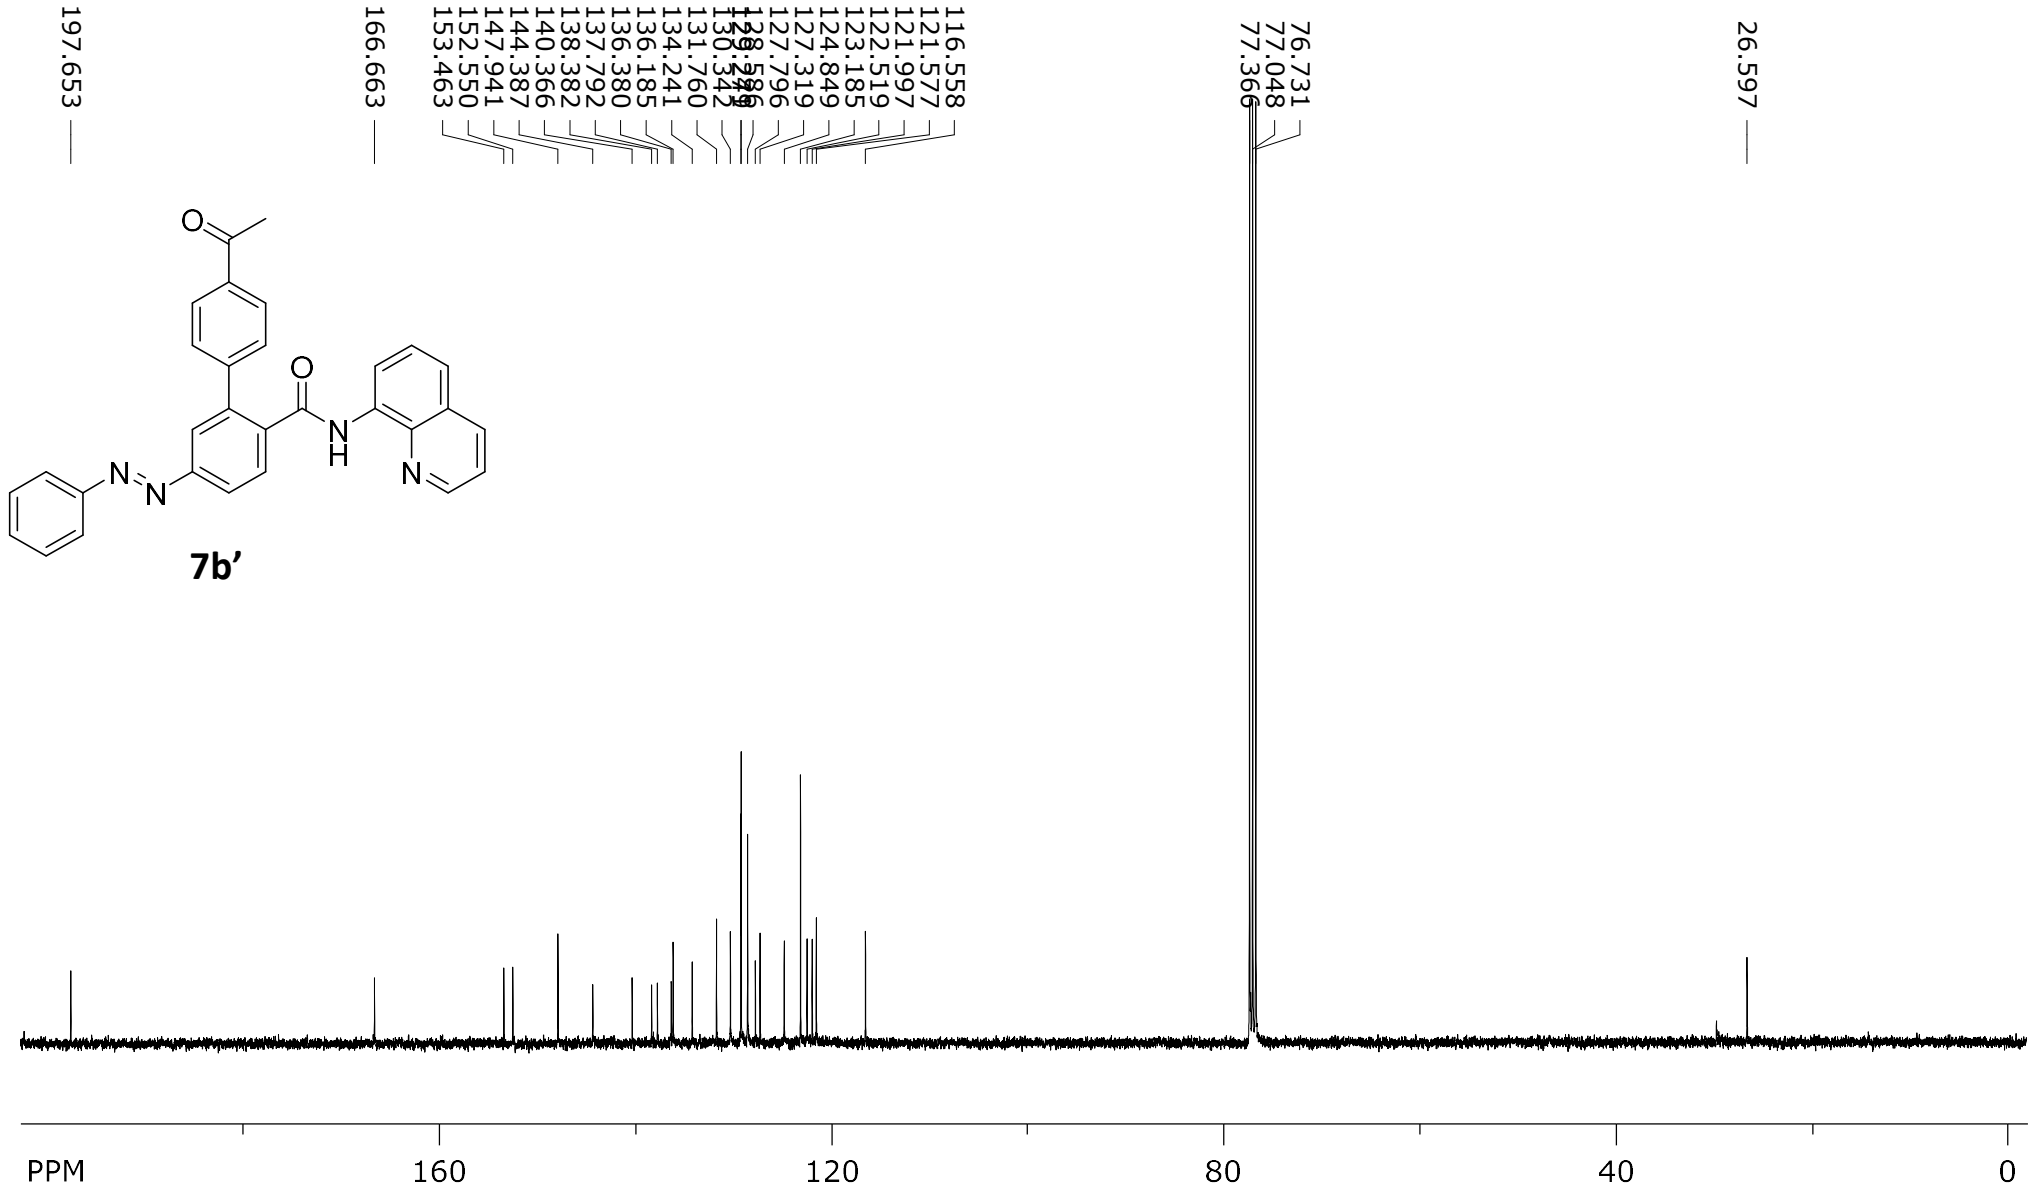



SpinWorks 4: RP 1357 B2  
C13CPD CDCl3 /opt/topspin3.5pl2/nmrdata nmrsu 51

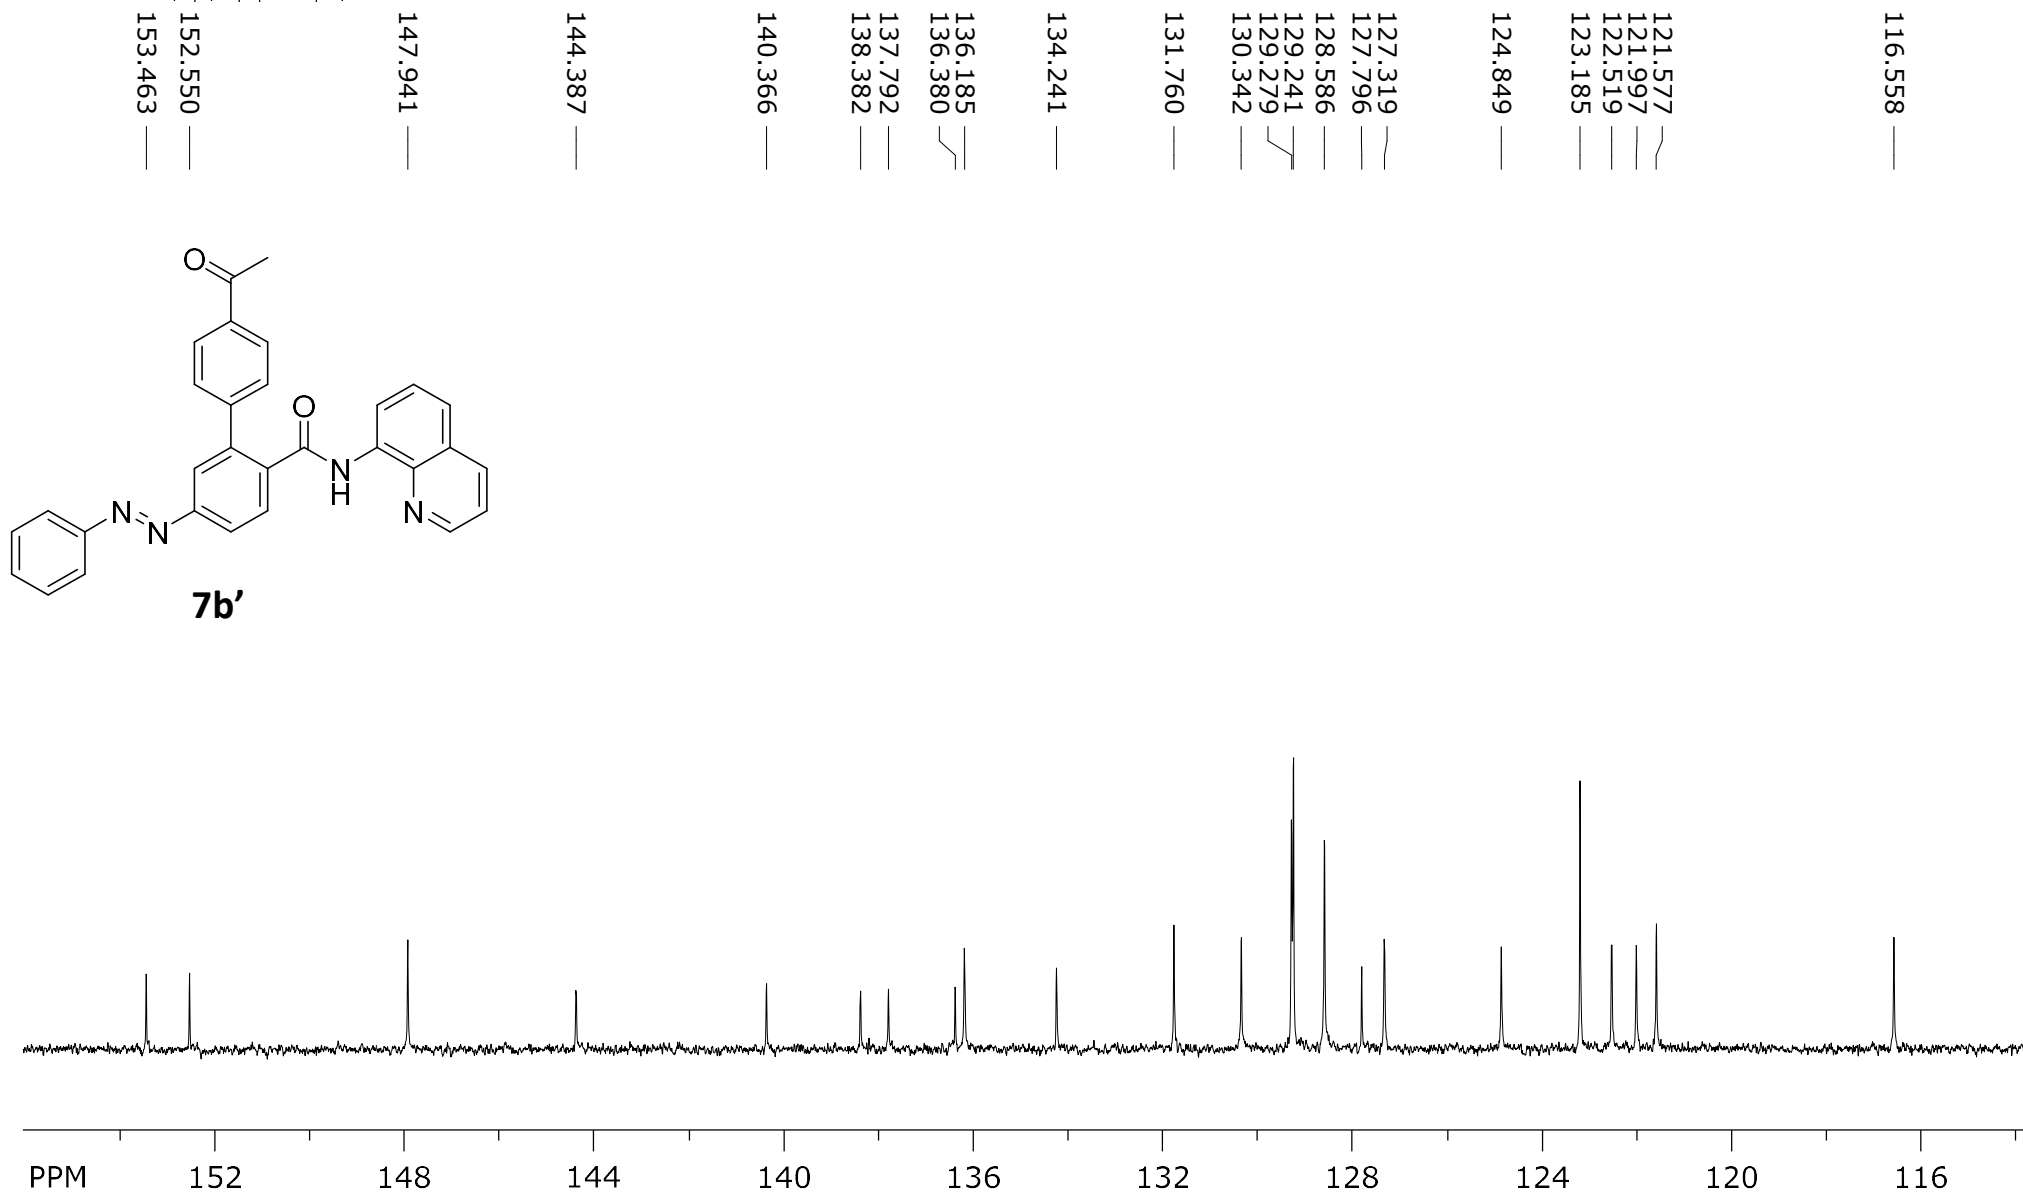

SpinWorks 4: RP 973 R B  
PROTON CDCl3 /opt/topspin3.5pl2/nmrdata nmrsu 34

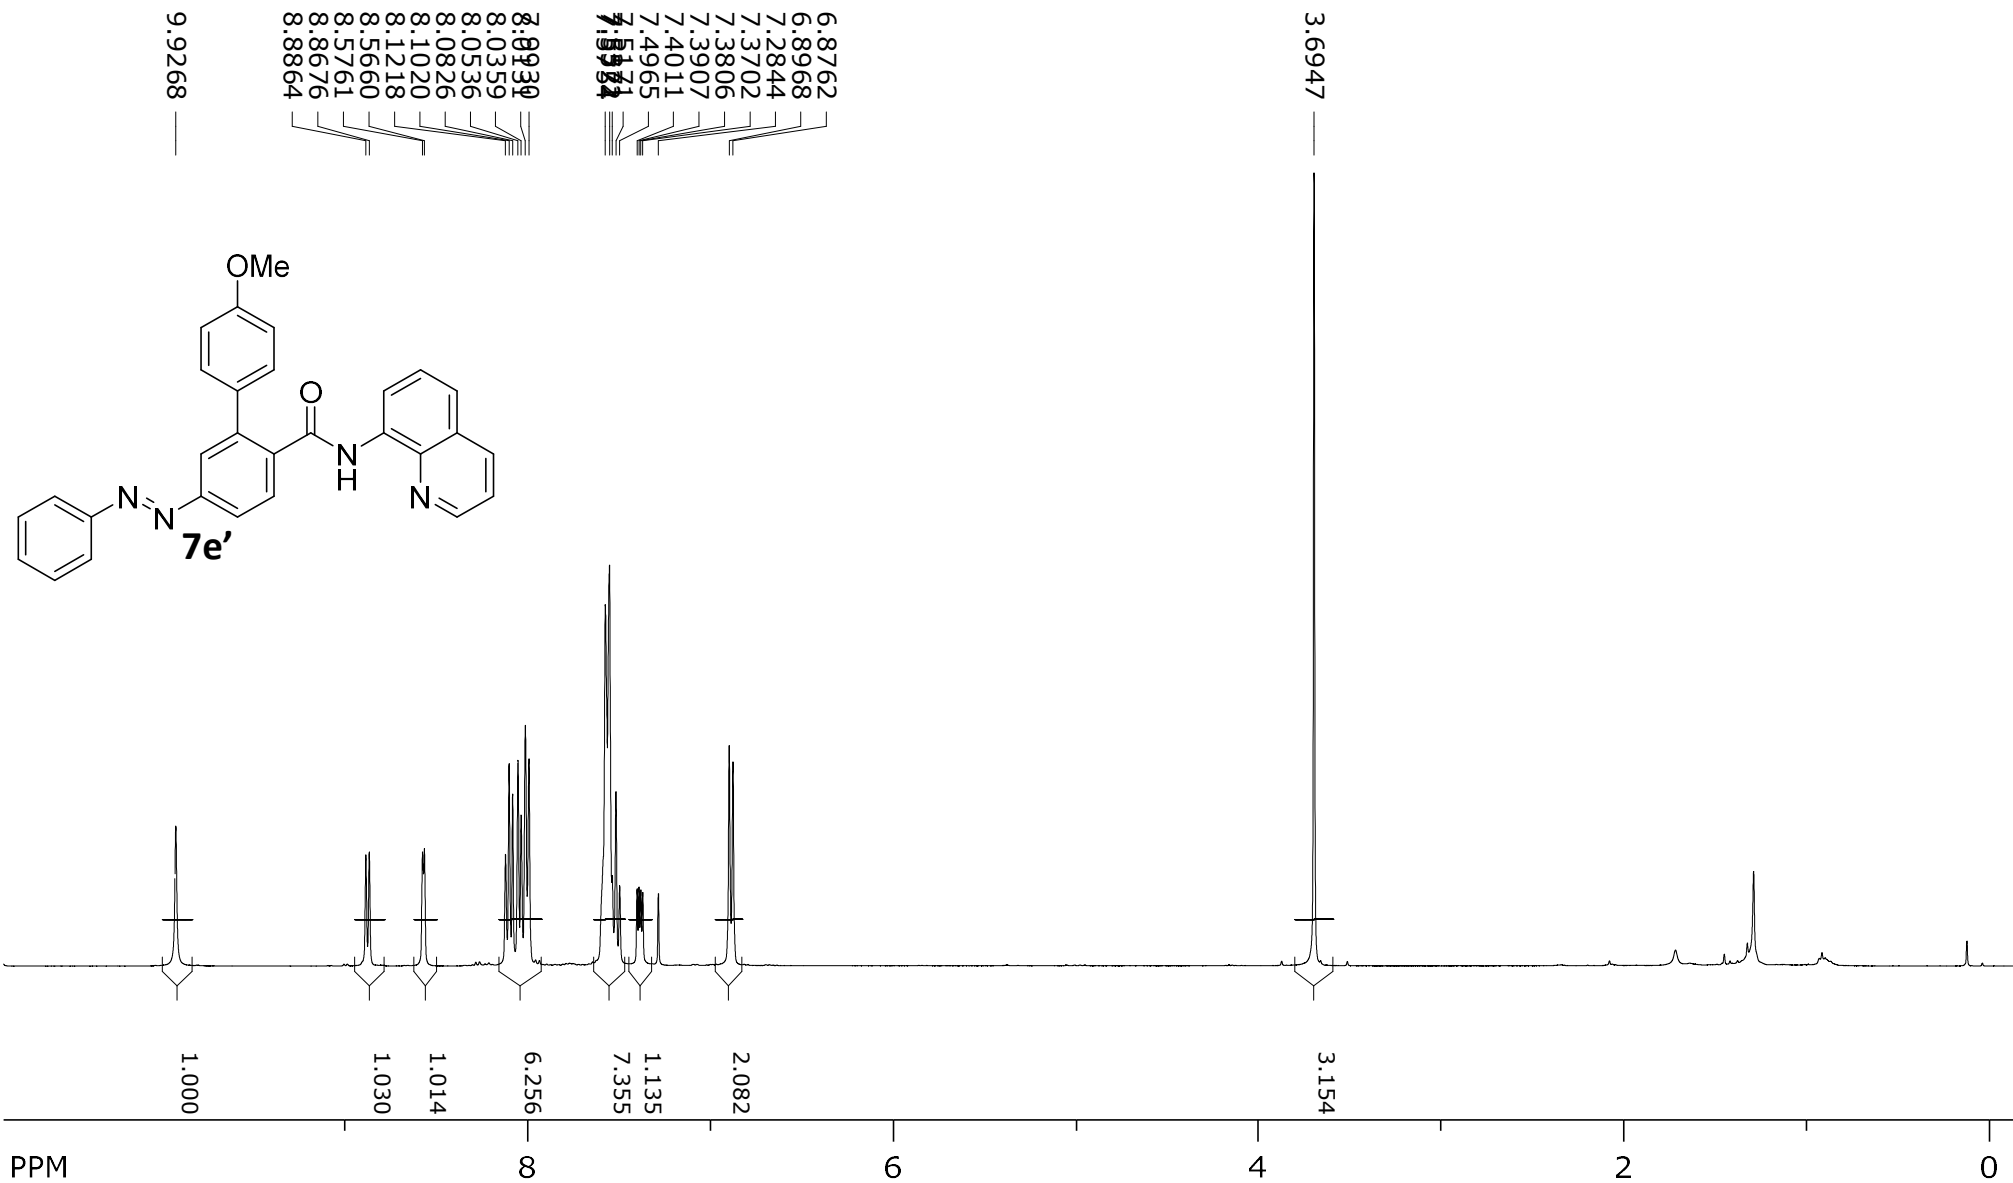

SpinWorks 4: RP 973 R B  
PROTON CDCl3 /opt/topspin3.5pl2/nmrdata nmrsu 34

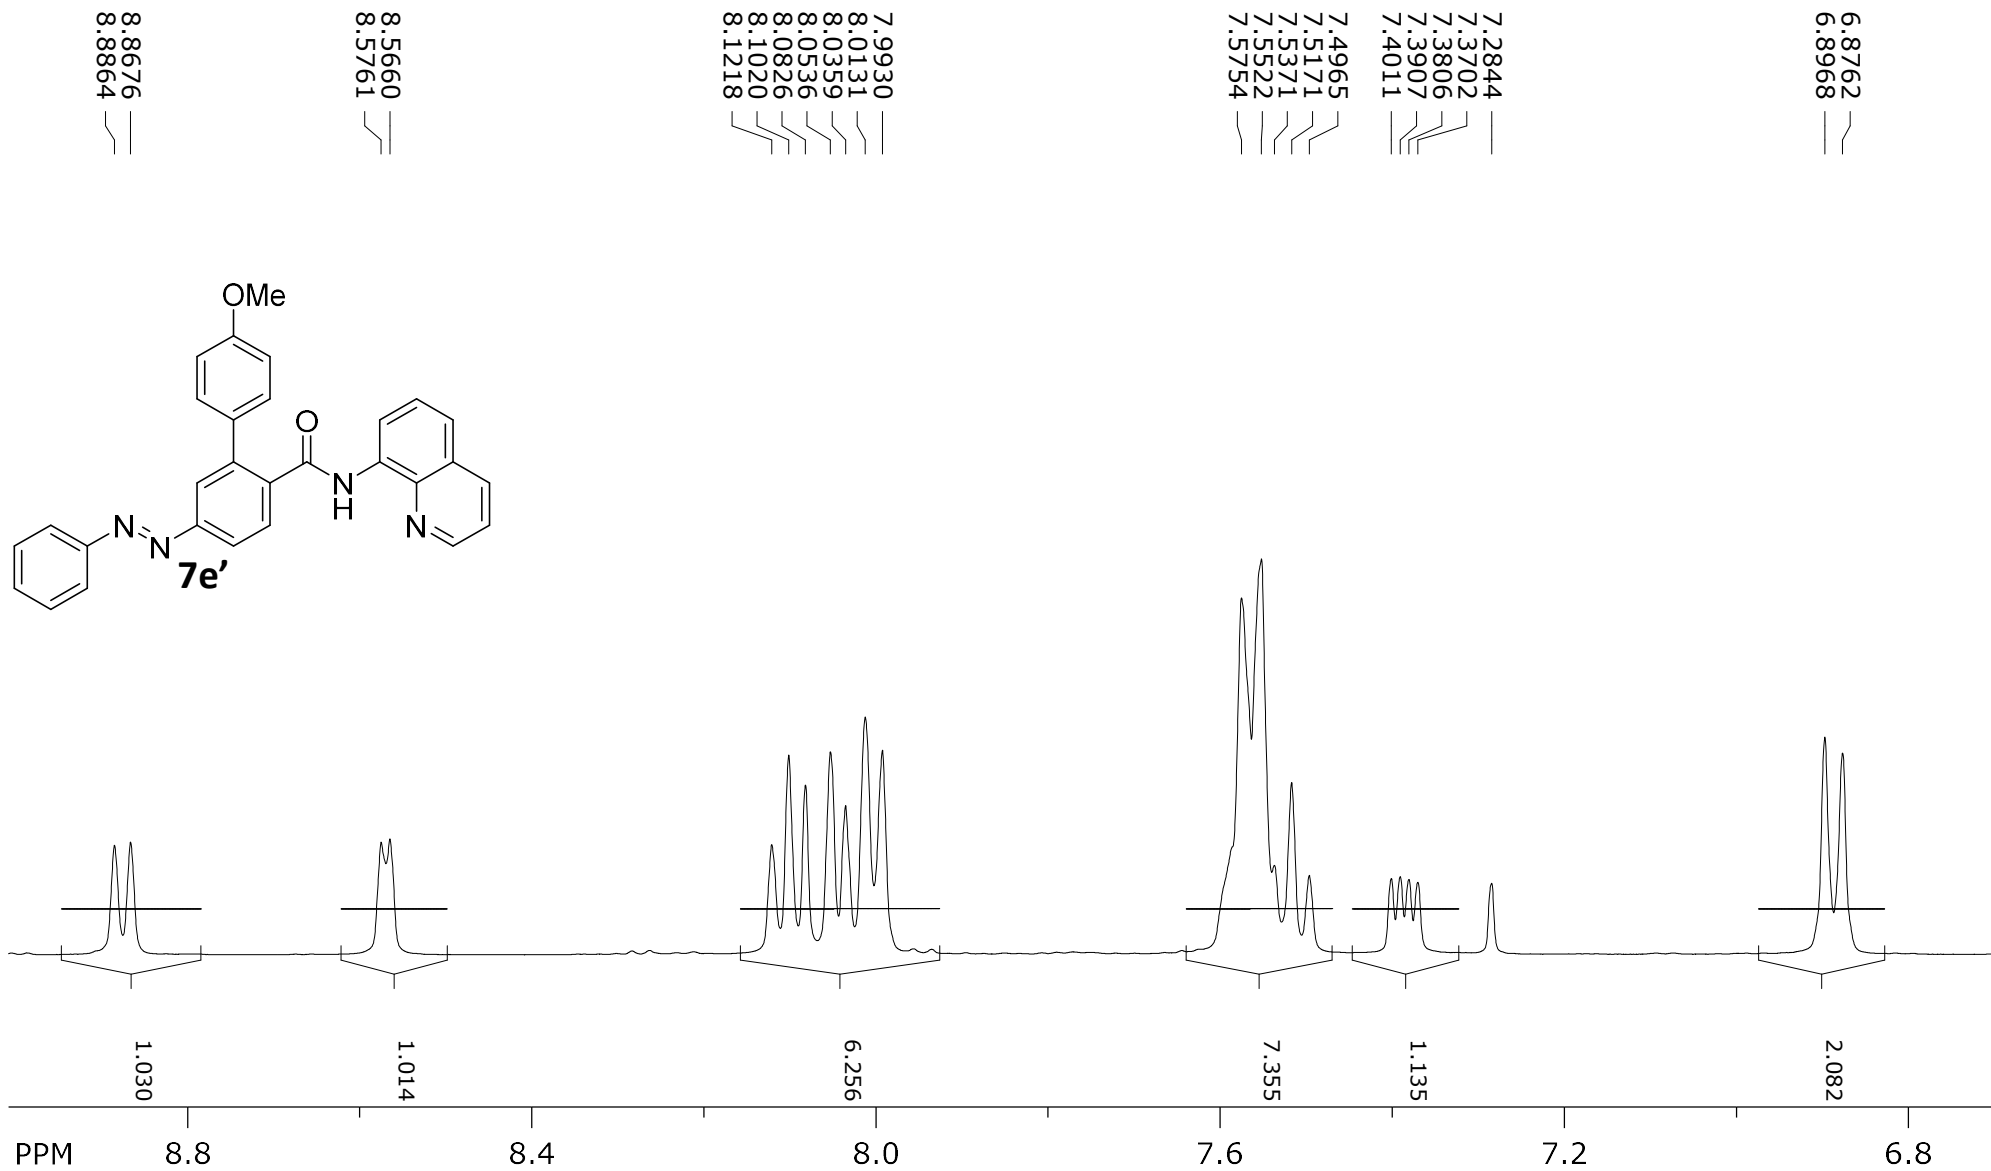

SpinWorks 4: RP 973 R.B  
C13CPD CDCl3 /opt/topspin3.5pl2/nmrdata nmrsu 34

167.313  
159.636  
153.423  
152.601  
147.834  
141.062  
138.462  
137.567  
136.075  
134.486  
131.783  
130.471  
130.258  
129.225  
127.773  
127.316  
125.193  
123.136  
121.738  
121.498  
121.268  
116.443  
114.098

76.770  
77.089  
77.406

55.214

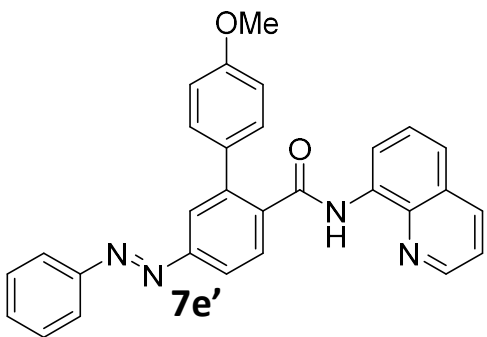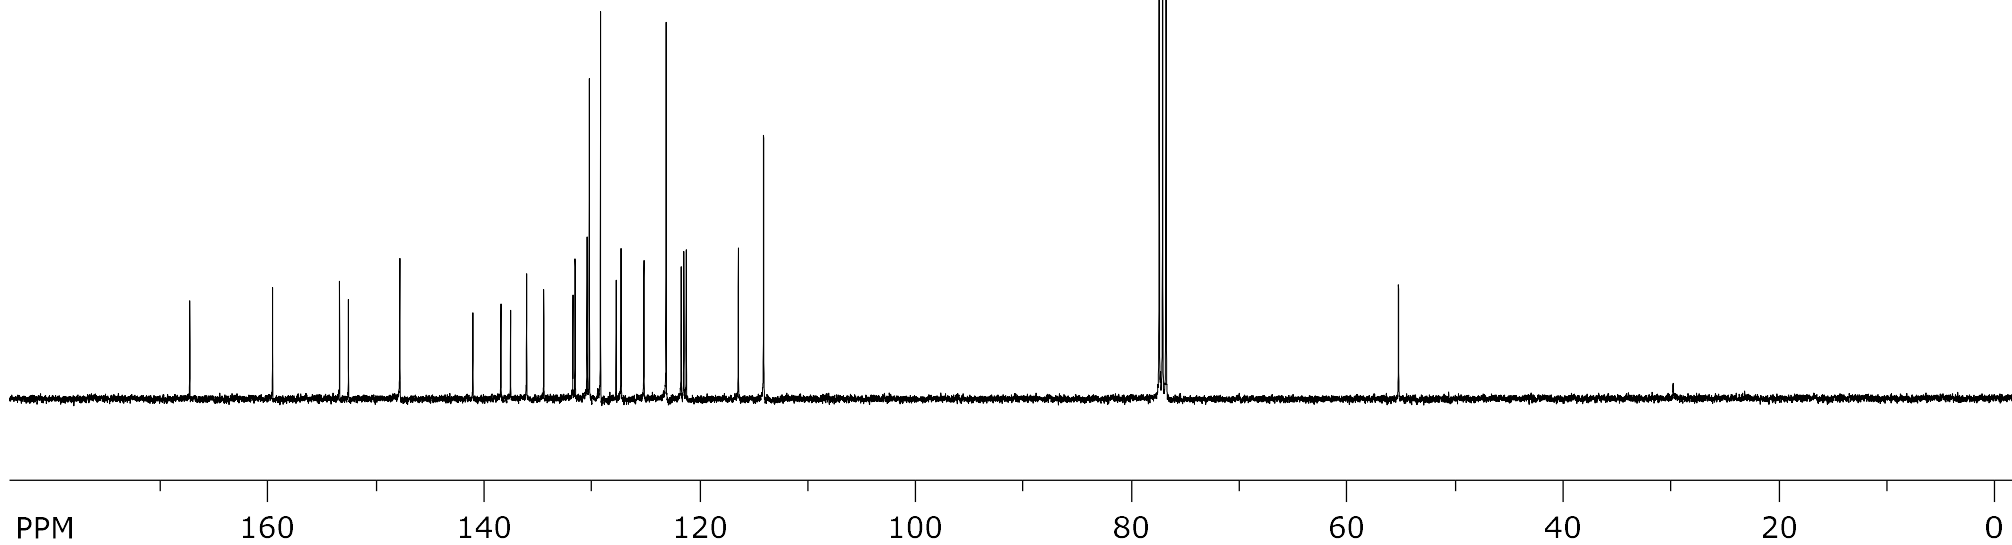

SpinWorks 4: RP 1370  
PROTON CDCl3 /opt/topspin3.5pl2/nmrdata nmrsu 51

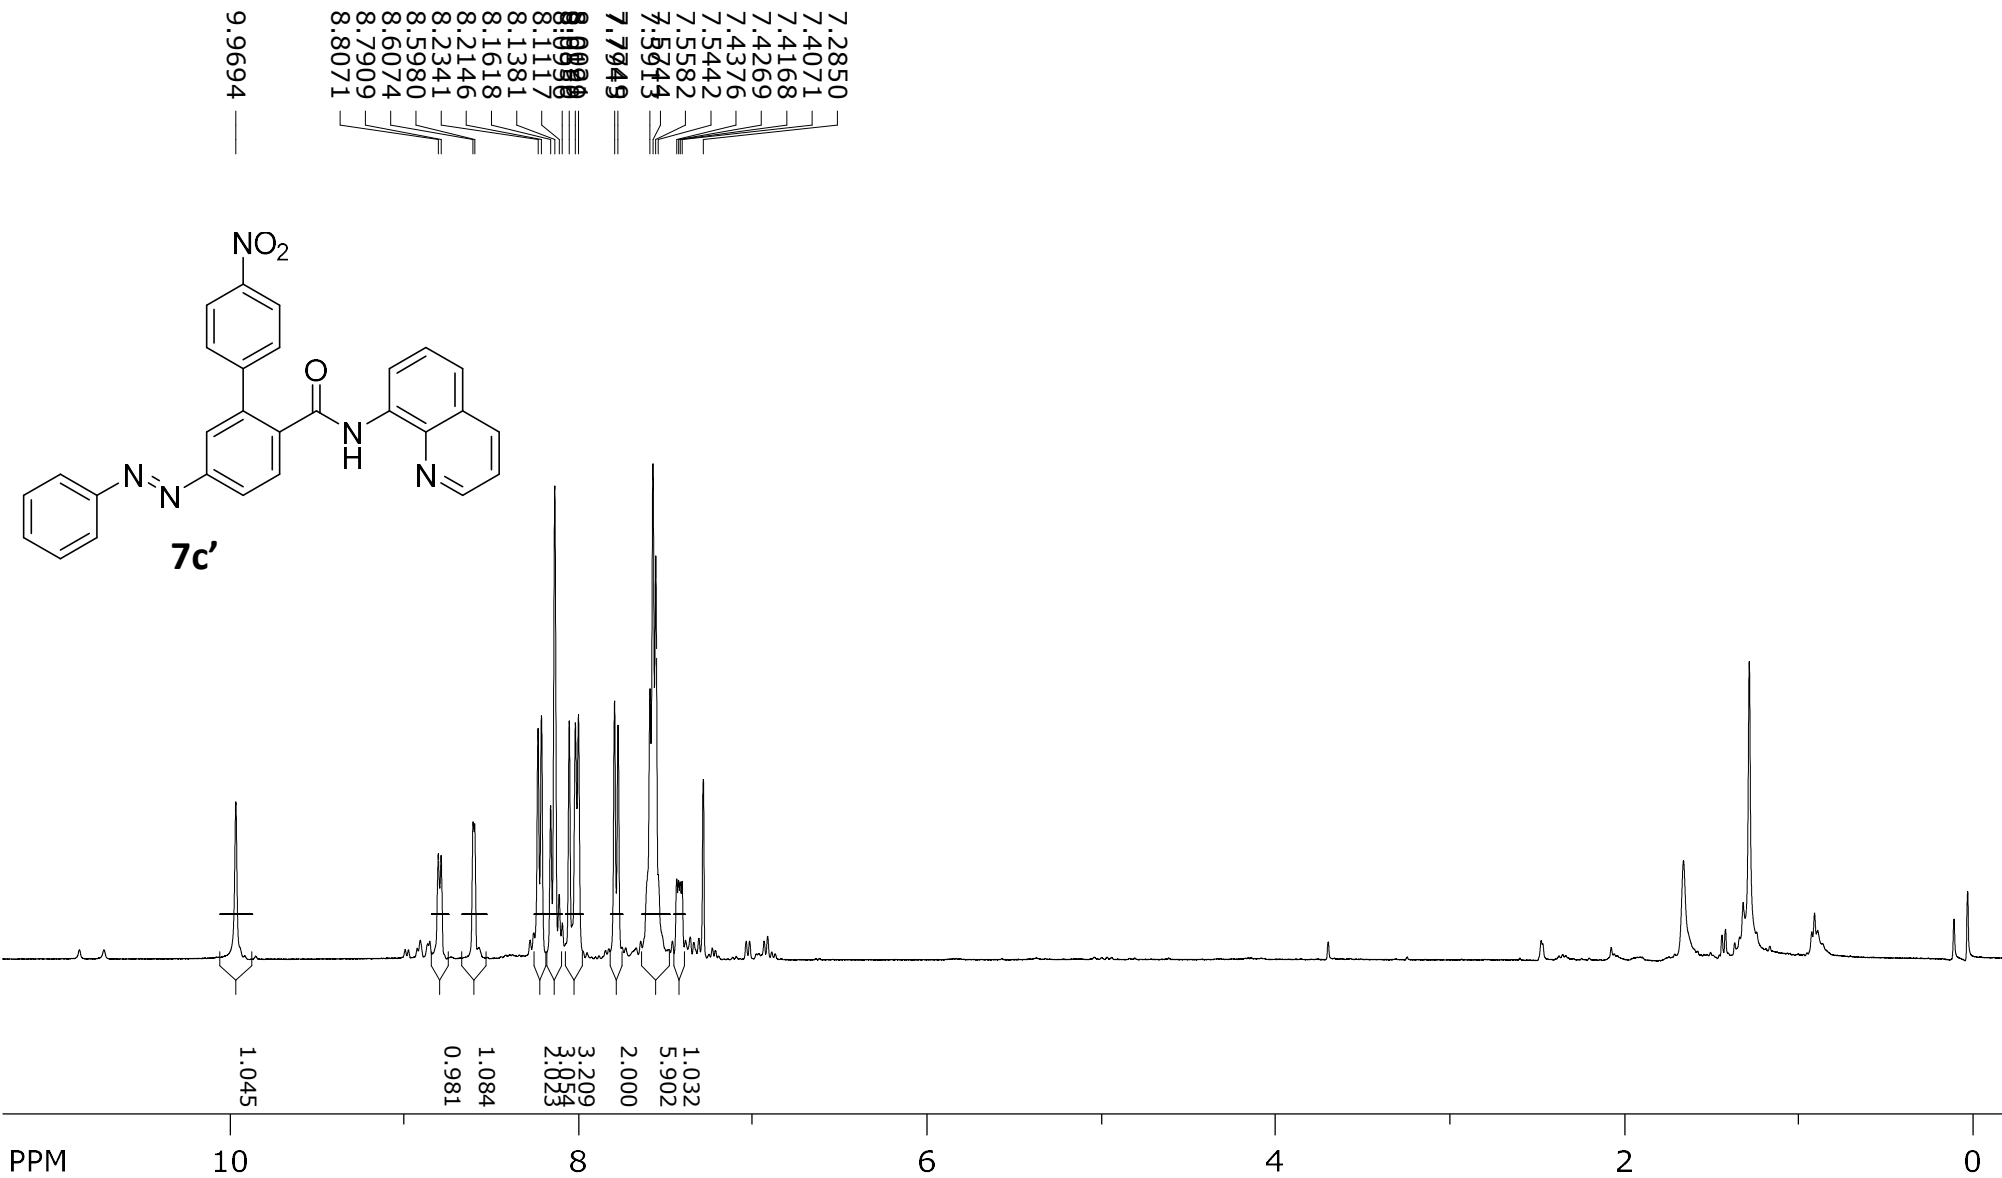

SpinWorks 4: RP 1370  
PROTON CDCl3 /opt/topspin3.5pl2/nmrdata nmrsu 51

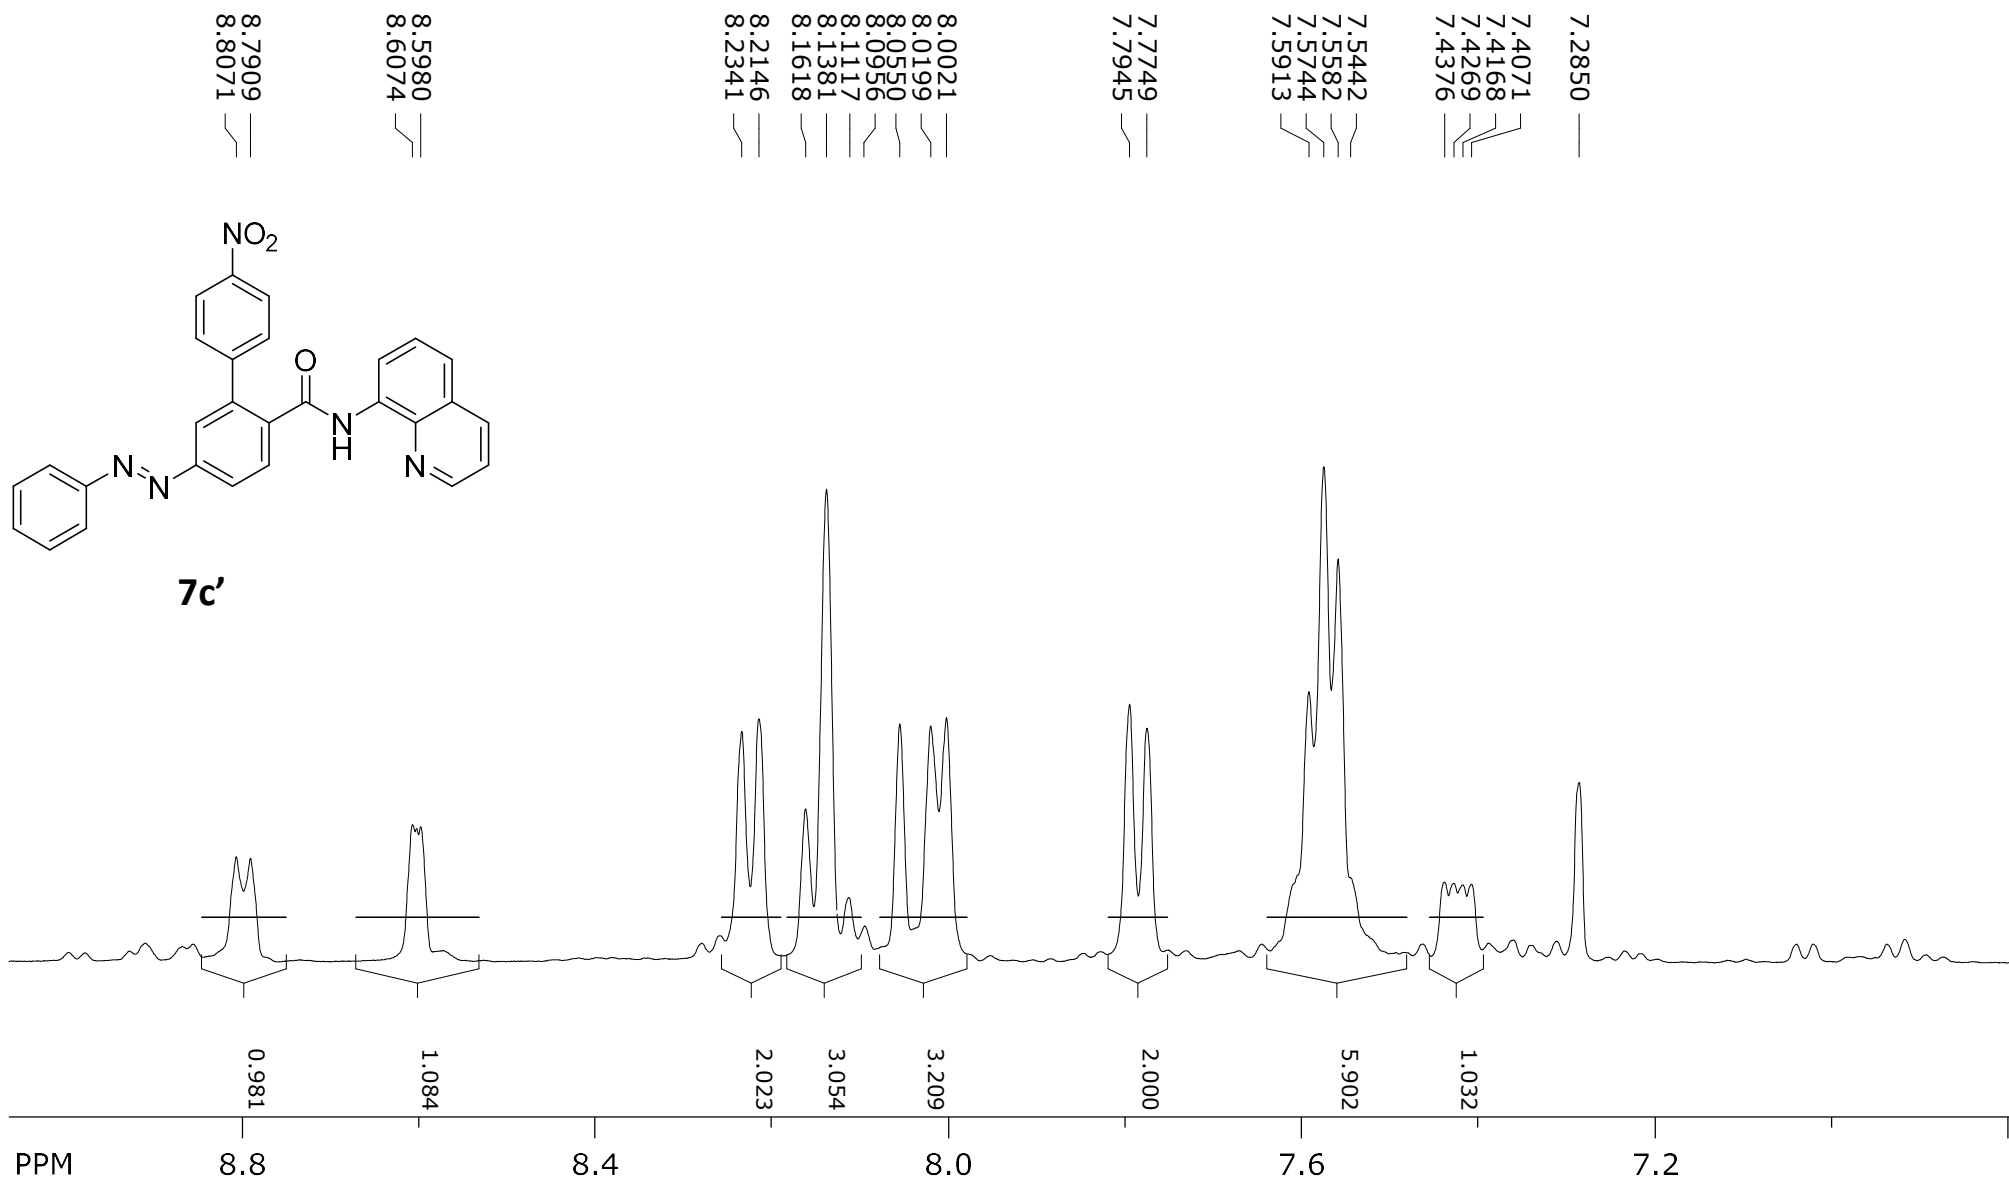

SpinWorks 4: RP 1370  
C13CPD CDCl3 /opt/topspin3.5pl2/nmrdata nmrsu 51

166.223  
153.467  
152.462  
148.036  
147.512  
146.404  
137.738  
136.395  
133.994  
131.960  
130.380  
129.940  
129.298  
127.869  
127.343  
124.596  
123.792  
123.302  
123.244  
122.304  
121.776  
116.653

76.746  
77.063  
77.381

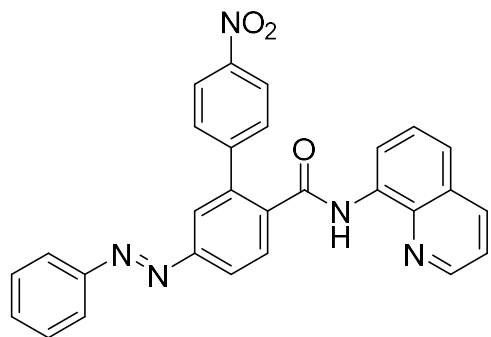

**7c'**

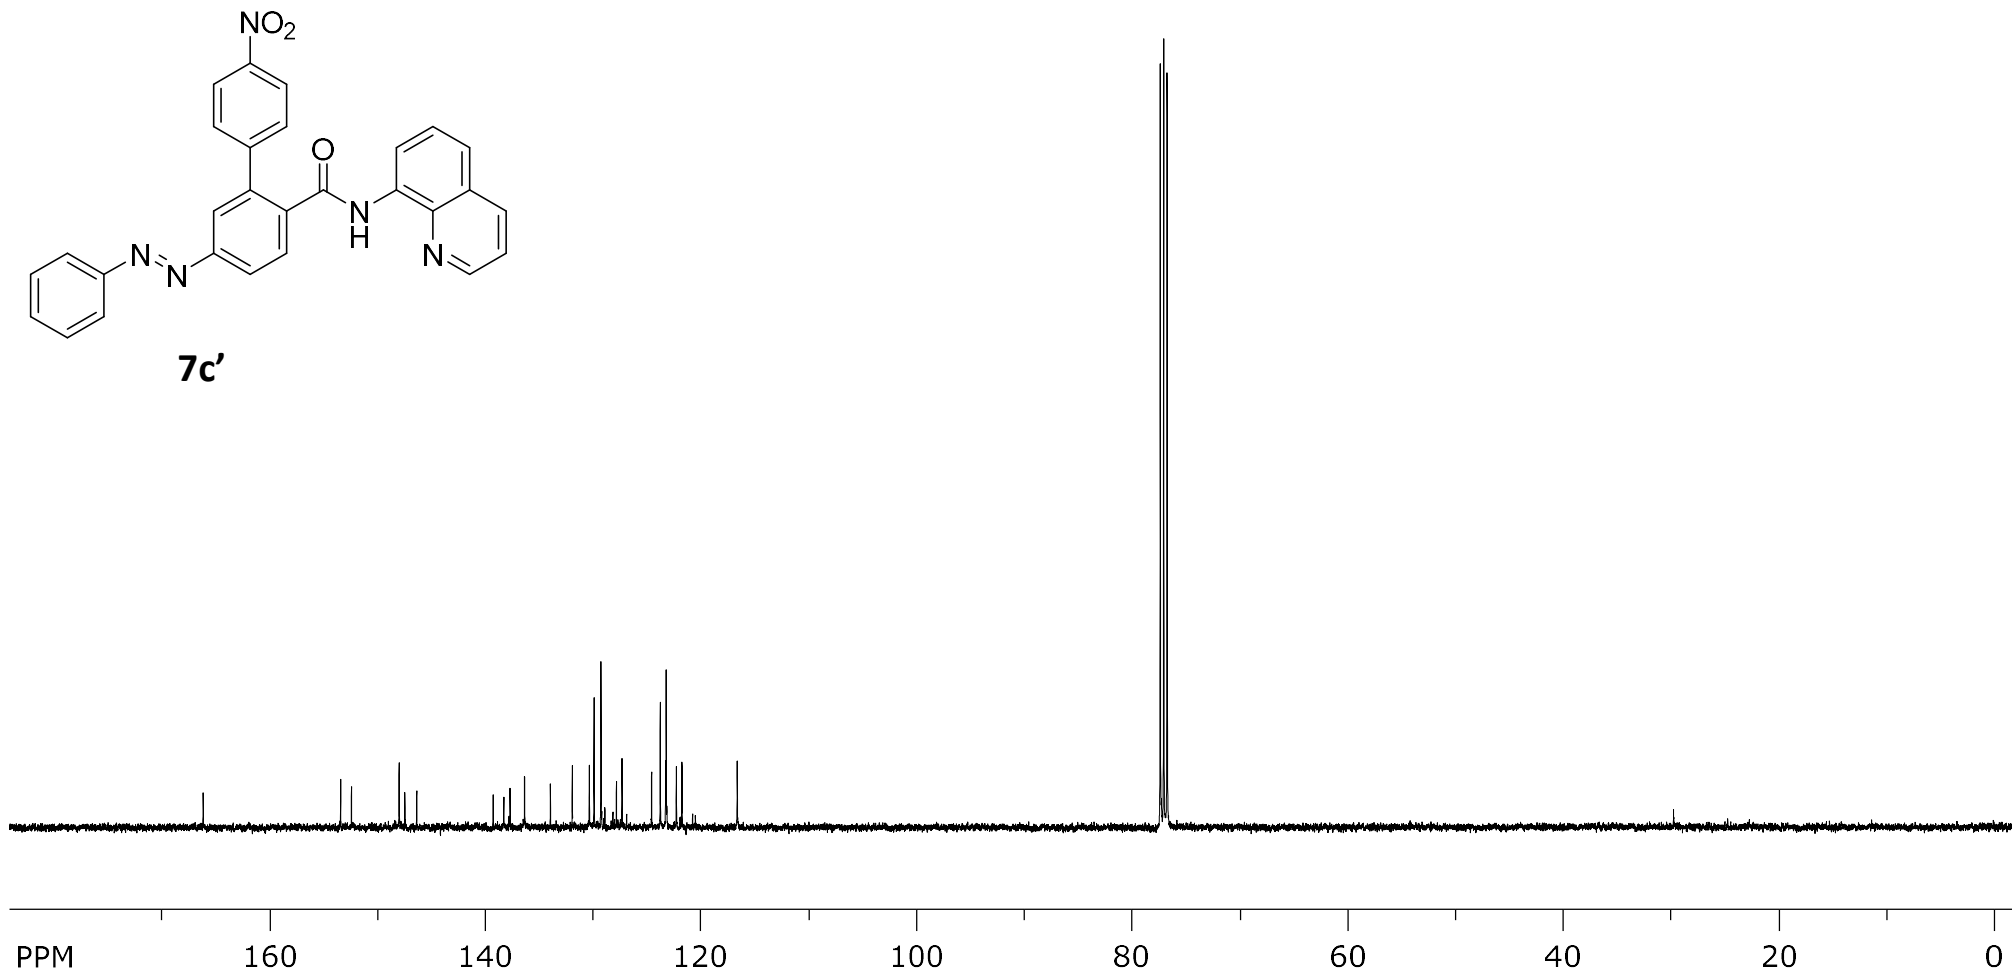

SpinWorks 4: RP 1359  
PROTON CDCl3 /opt/topspin3.5pl2/nmrdata nmrsu 56

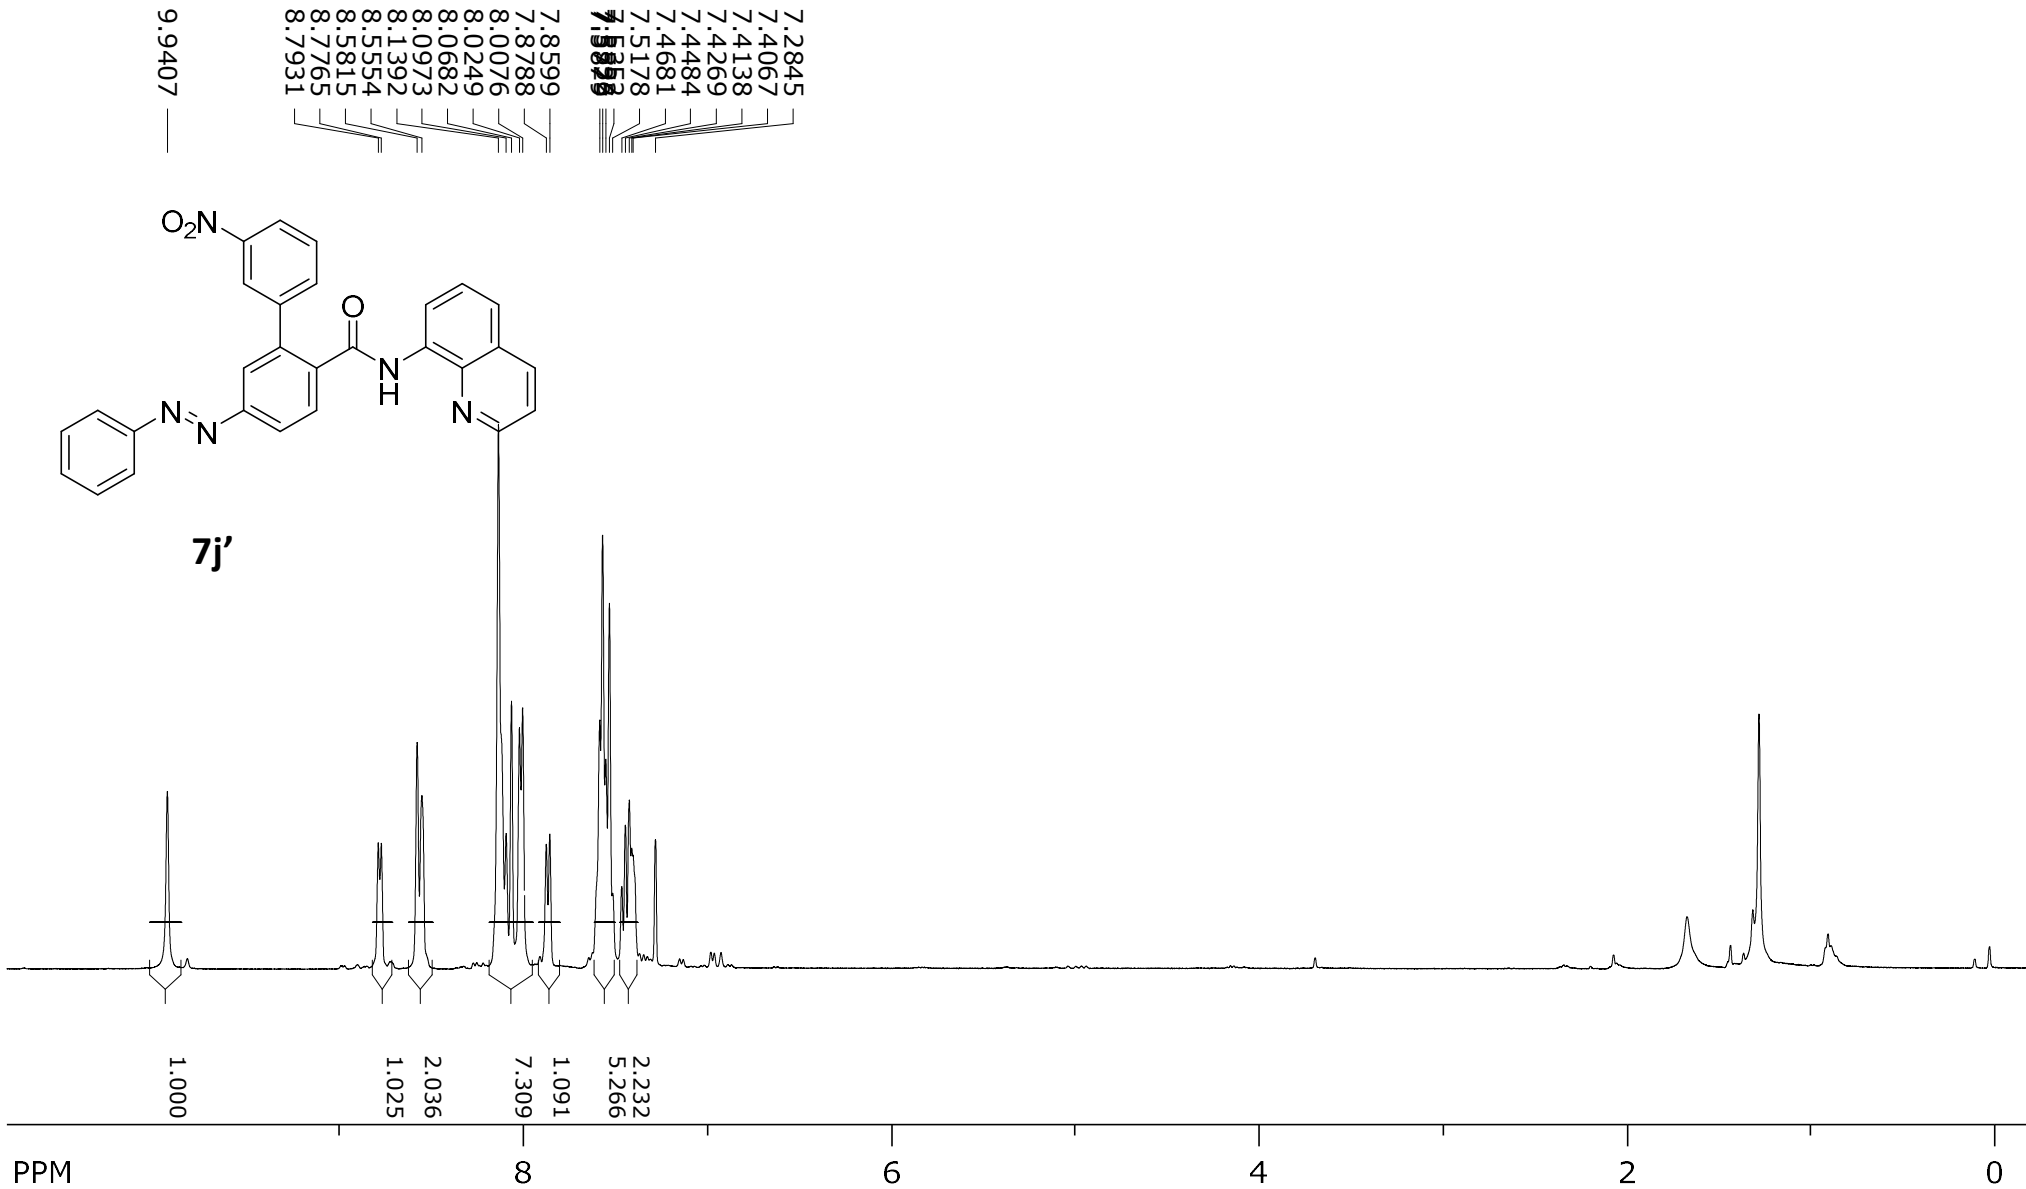



SpinWorks 4: RP 1359  
PROTON CDCl3 /opt/topspin3.5pl2/nmrdata nmrsu 56

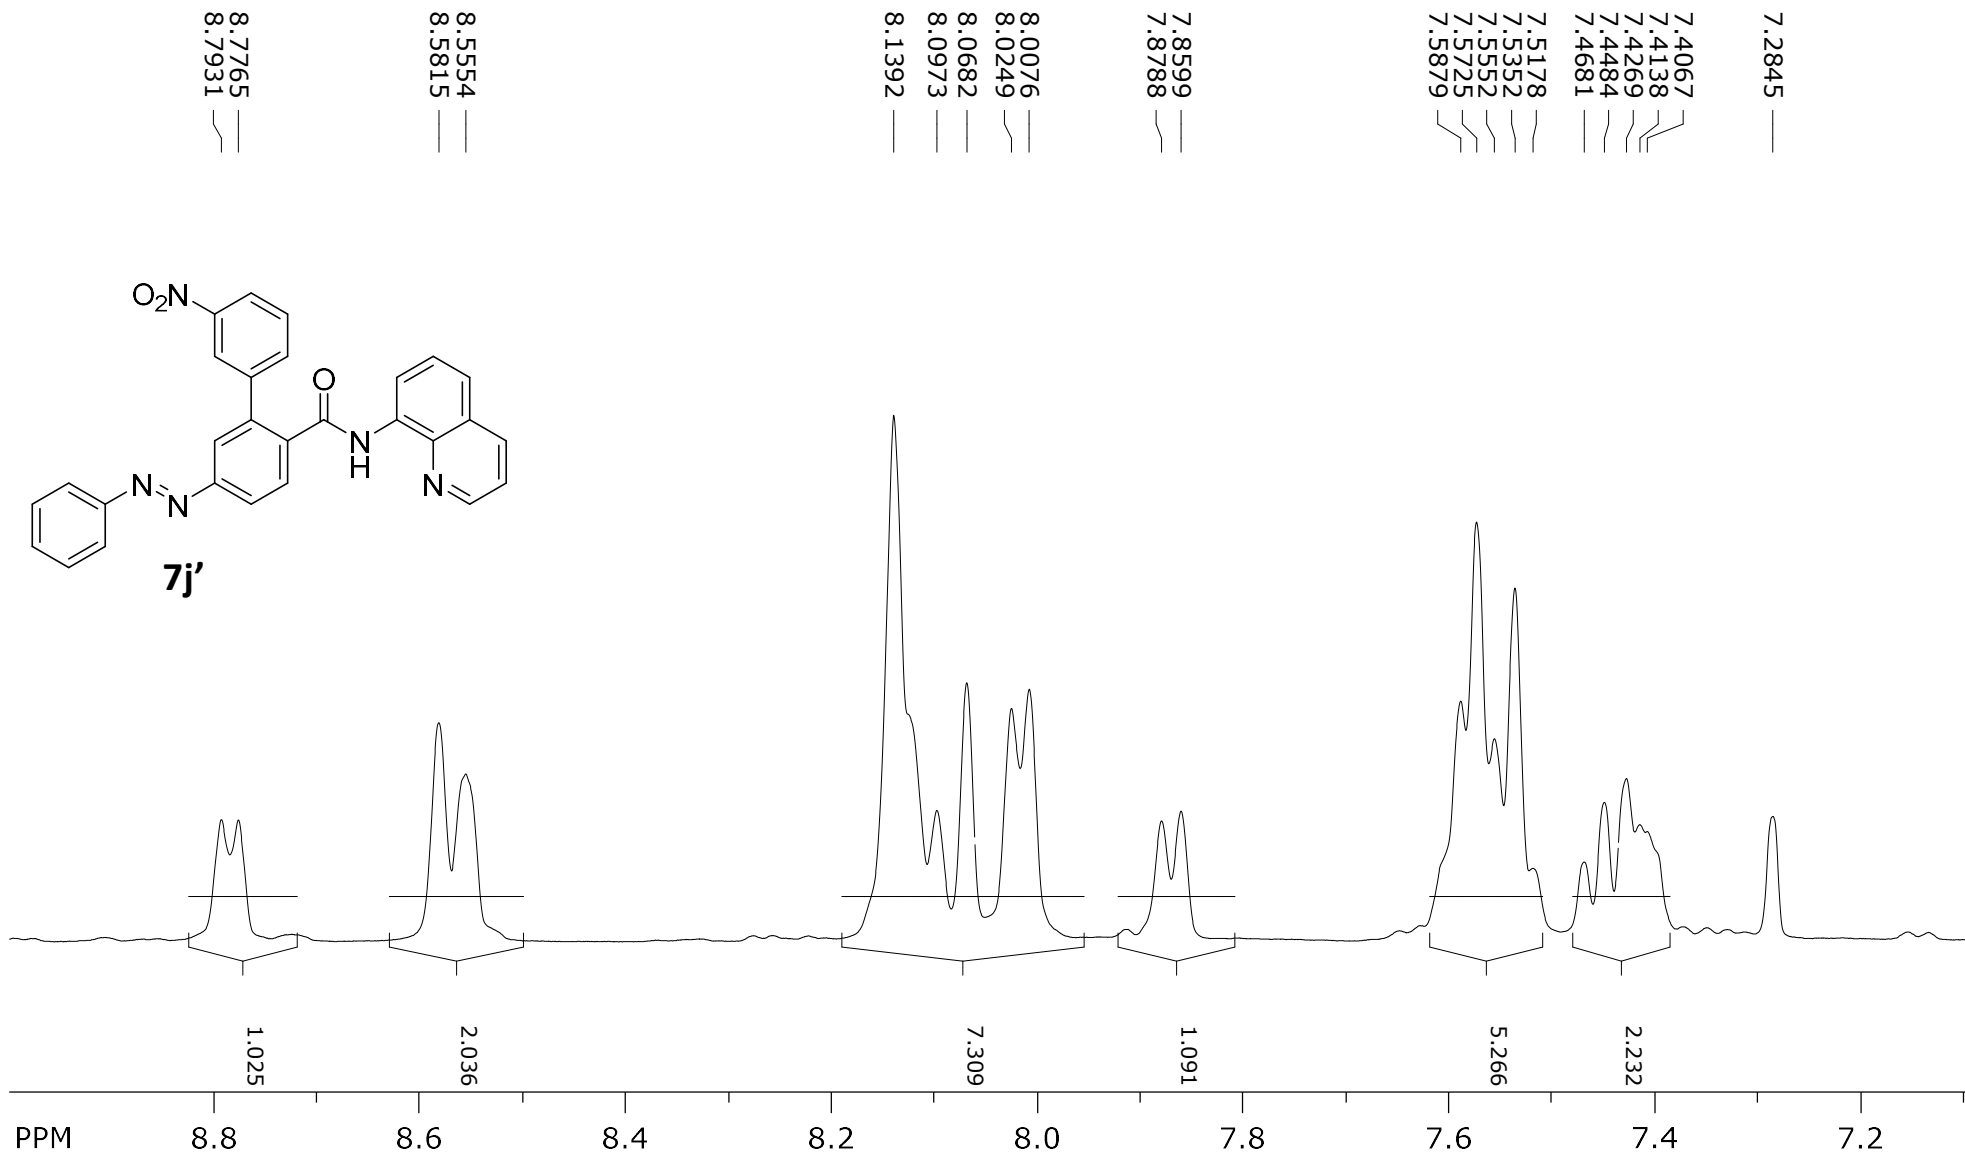

SpinWorks 4: RP 1359  
C13CPD CDCl3 /opt/topspin3.5pl2/nmrdata nmrsu 56

166.198  
153.509  
152.476  
148.409  
148.085  
141.392  
139.069  
138.281  
137.791  
136.307  
135.177  
133.993  
131.923  
129.986  
129.386  
127.810  
127.325  
124.601  
123.895  
123.257  
122.829  
122.167  
121.773  
116.518

76.751  
77.069  
77.386

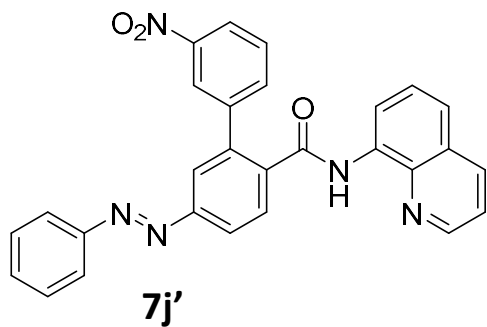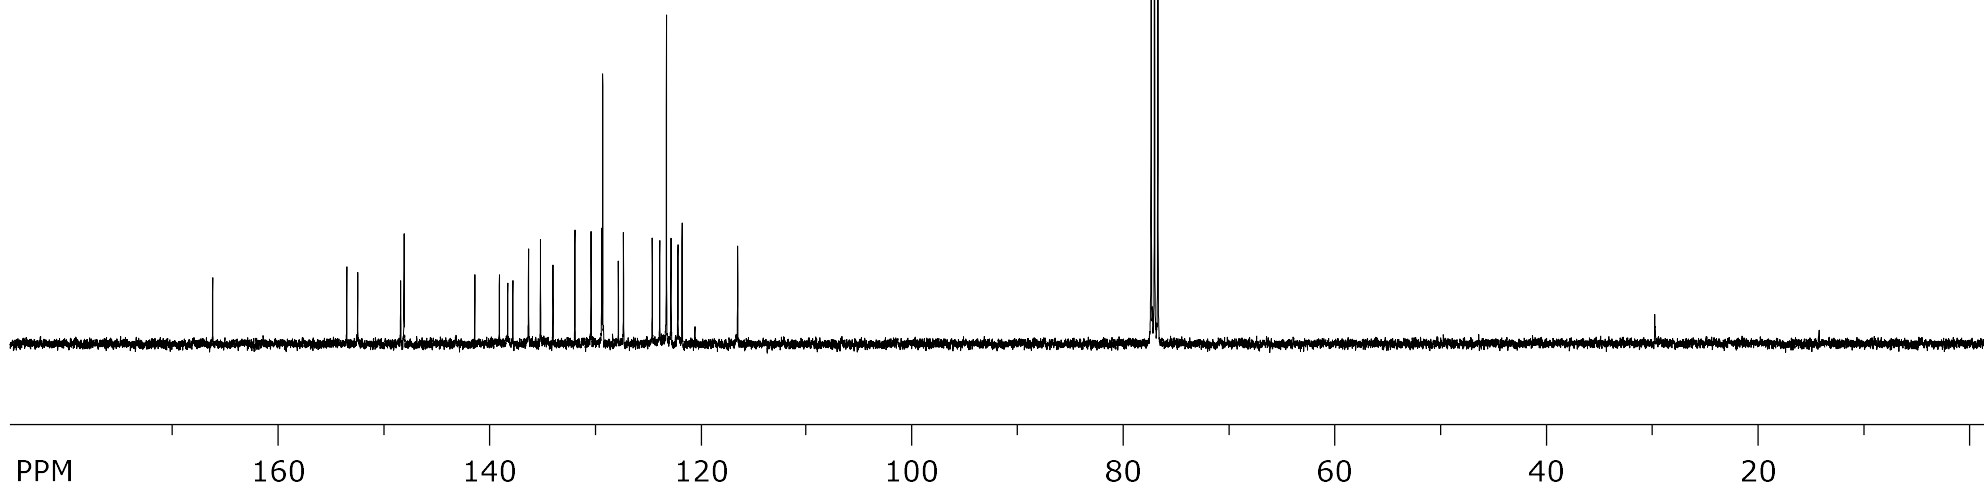

SpinWorks 4: RP 1359  
C13CPD CDCl3 /opt/topspin3.5pl2/nmrdata nmrsu 56

153.509 —  
152.476 —  
148.085 —  
148.409 —  
141.392 —  
139.069 —  
138.281 —  
137.791 —  
136.307 —  
135.177 —  
133.993 —  
131.923 —  
130.390 —  
129.286 —  
129.385 —  
127.810 —  
127.325 —  
124.601 —  
123.895 —  
123.257 —  
122.829 —  
122.167 —  
121.773 —  
116.518 —

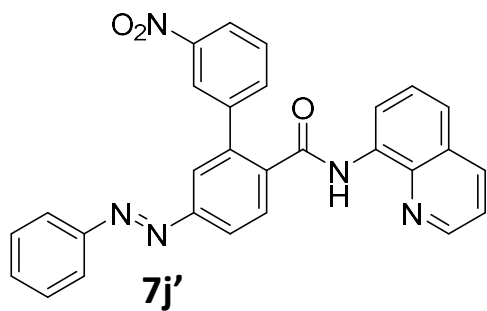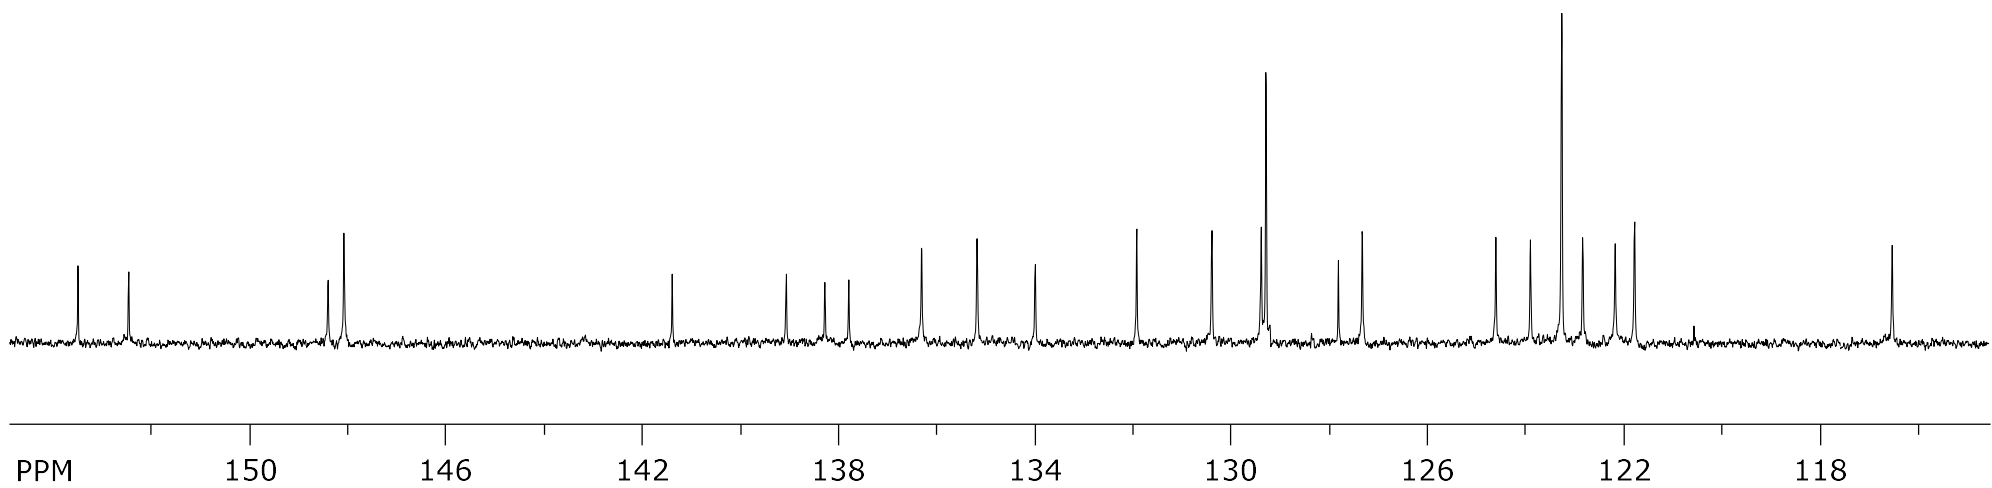

SpinWorks 4: RP AZO ME COOH  
PROTON DMSO /opt/topspin3.5pl2/nmrdata nmrsu 15

7.5879  
7.6010  
7.6114  
7.6214  
7.6430  
7.7670  
7.8914  
7.9024  
7.9105  
7.9947  
8.0153

2.6178

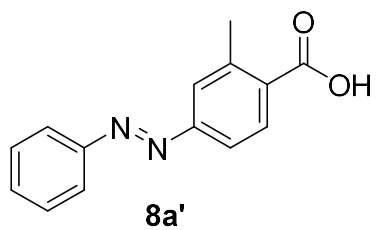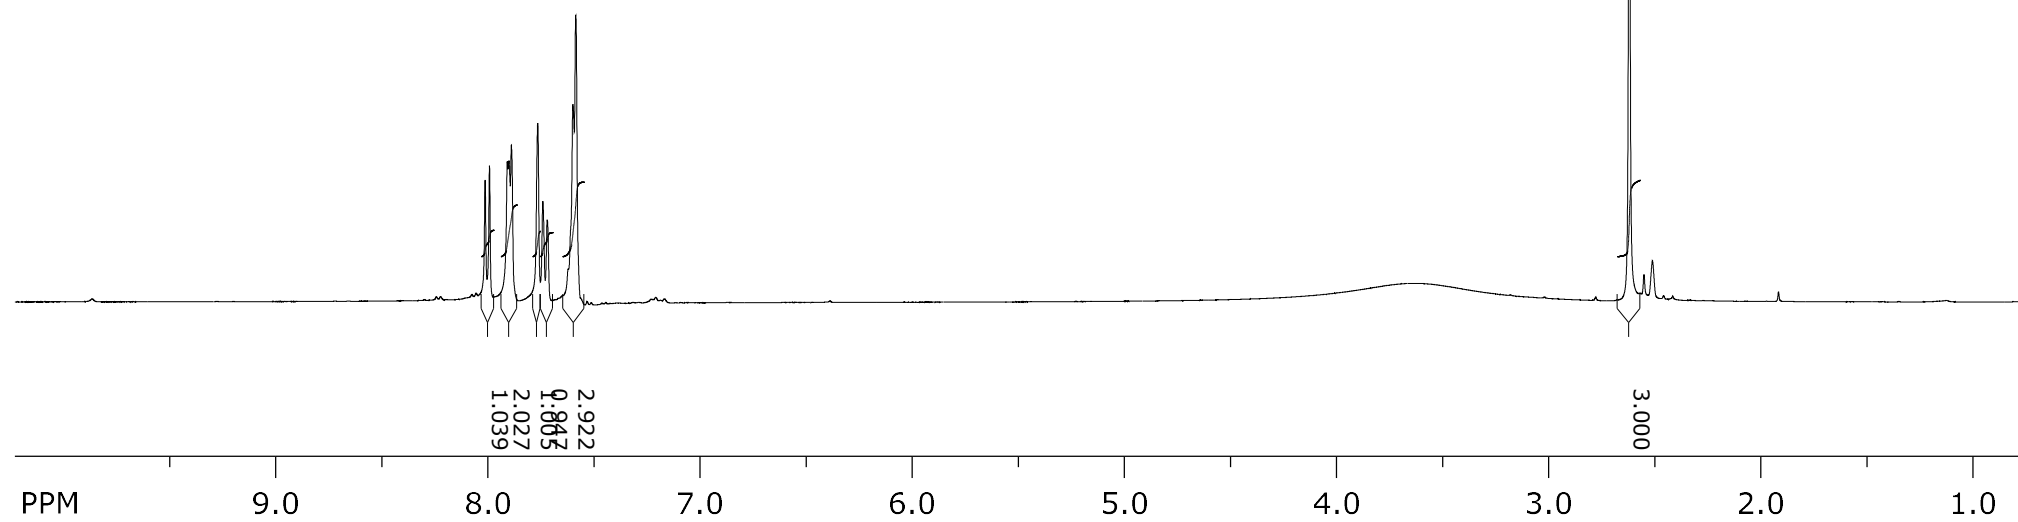

SpinWorks 4: RP AZO ME COOH  
PROTON DMSO /opt/topspin3.5pl2/nmrdata nmrsu 15

|        |        |        |        |        |        |        |        |        |        |        |        |
|--------|--------|--------|--------|--------|--------|--------|--------|--------|--------|--------|--------|
| 8.0153 | 7.9947 | 7.8914 | 7.9024 | 7.9105 | 7.7670 | 7.7430 | 7.7221 | 7.6239 | 7.6114 | 7.6010 | 7.5879 |
|--------|--------|--------|--------|--------|--------|--------|--------|--------|--------|--------|--------|

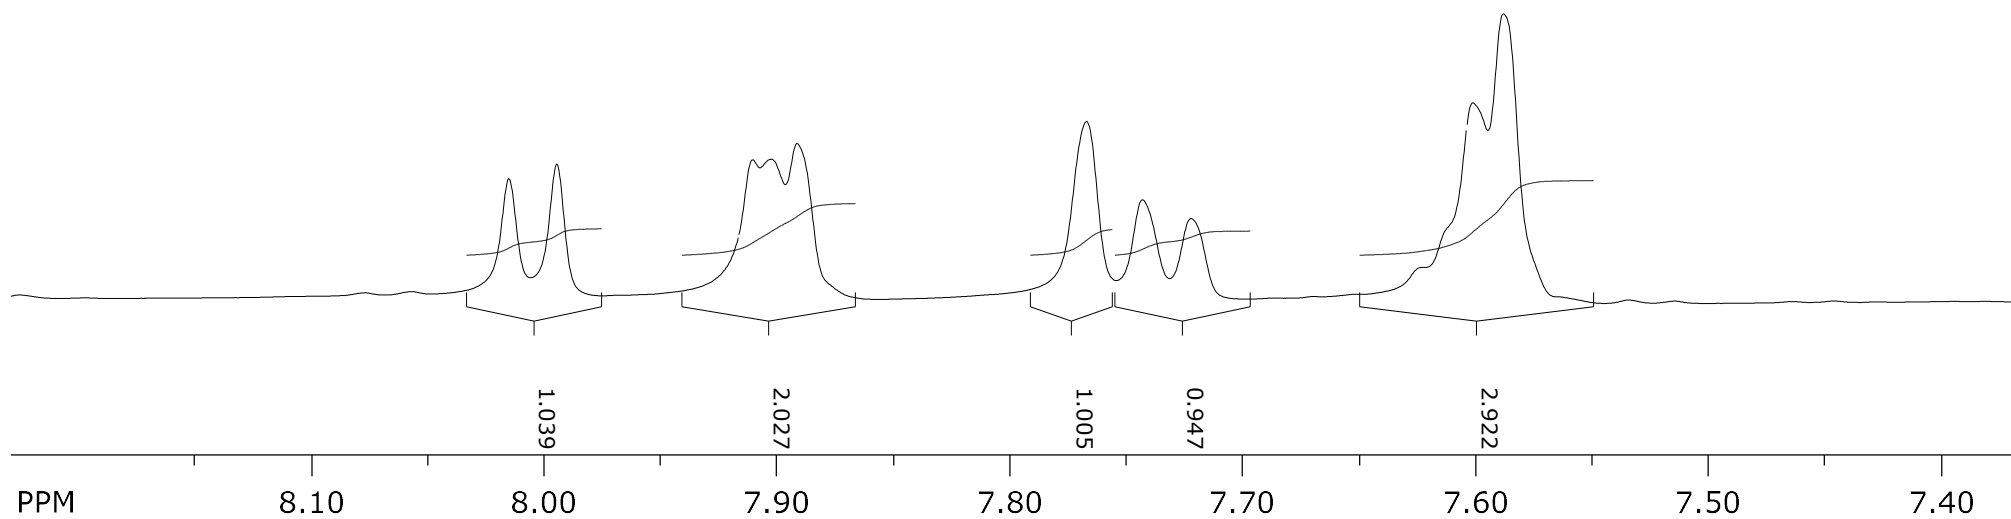

SpinWorks 4: RP AZO ME COOH  
C13CPD DMSO /opt/topspin3.5pl2/nmrdata nmrsu 15

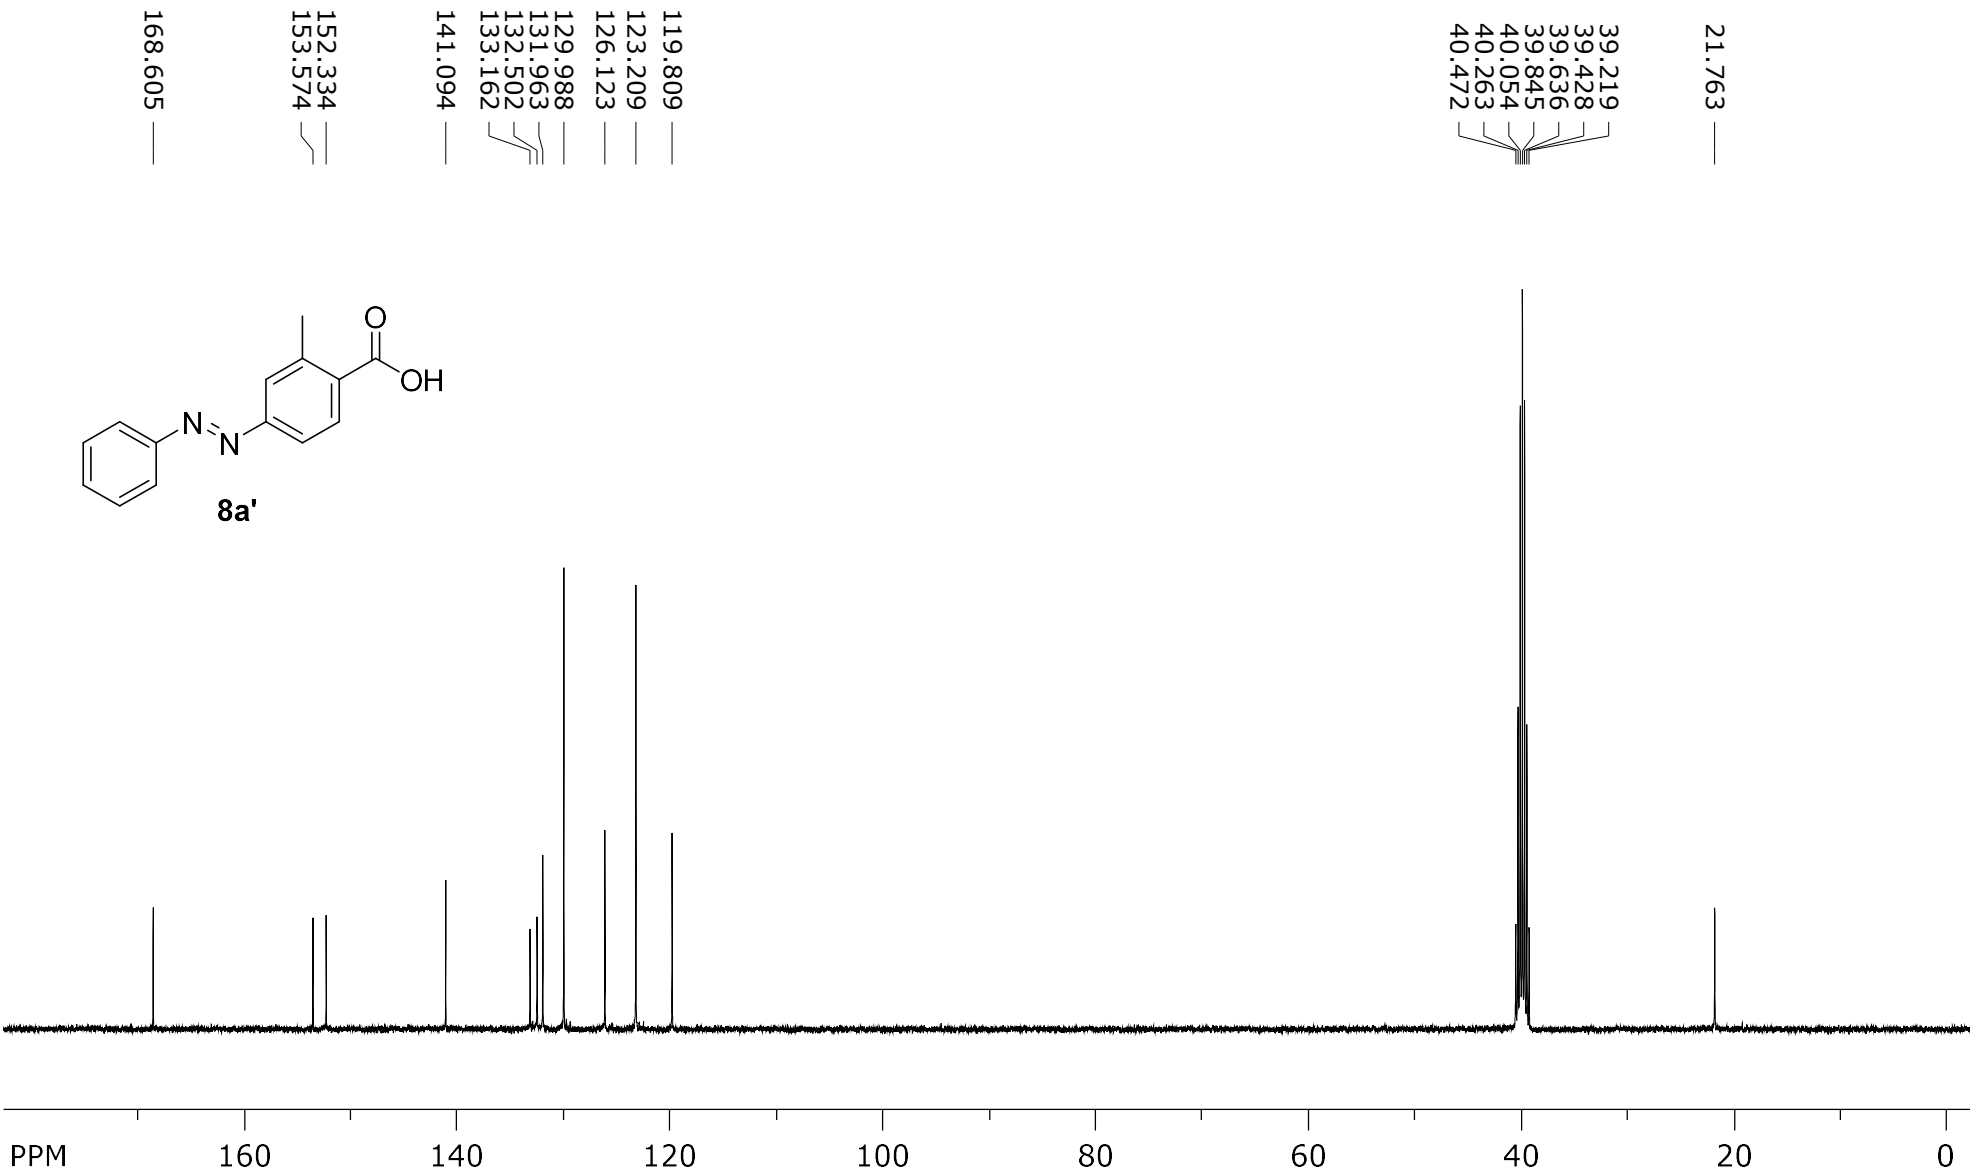

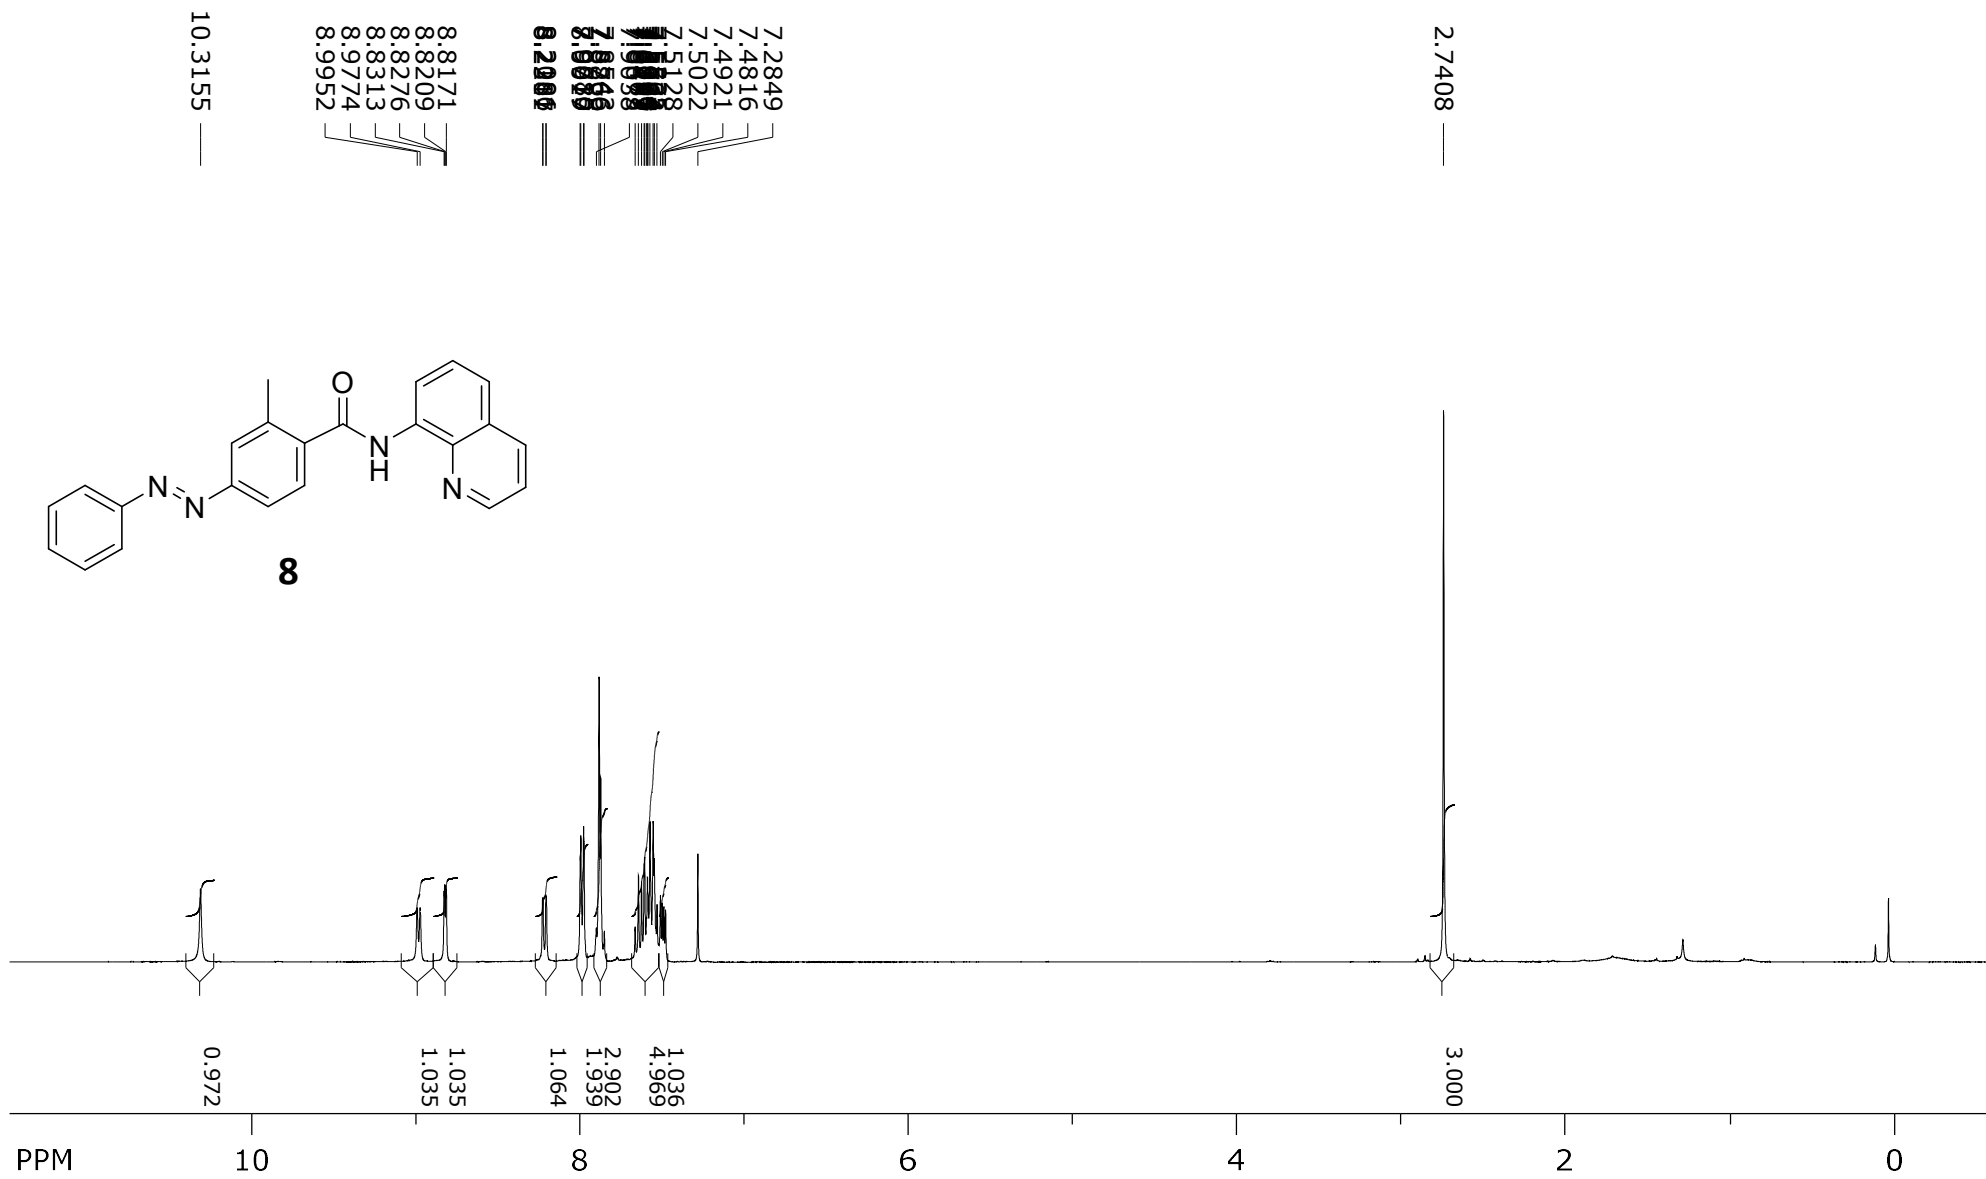

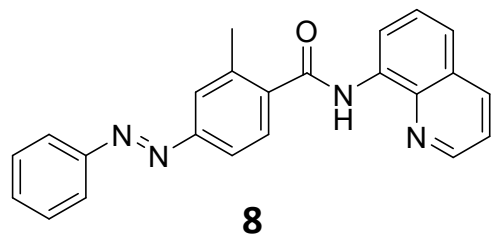

8.9774  
8.9952

8.8171  
8.8209  
8.8276  
8.8313

8.2081  
8.2106  
8.2287  
8.2311

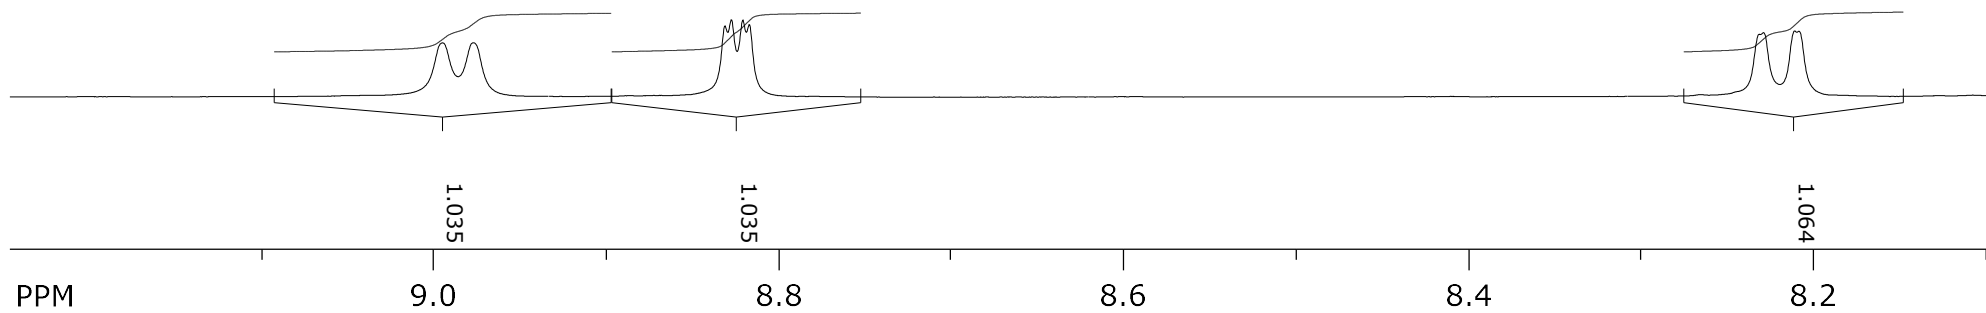



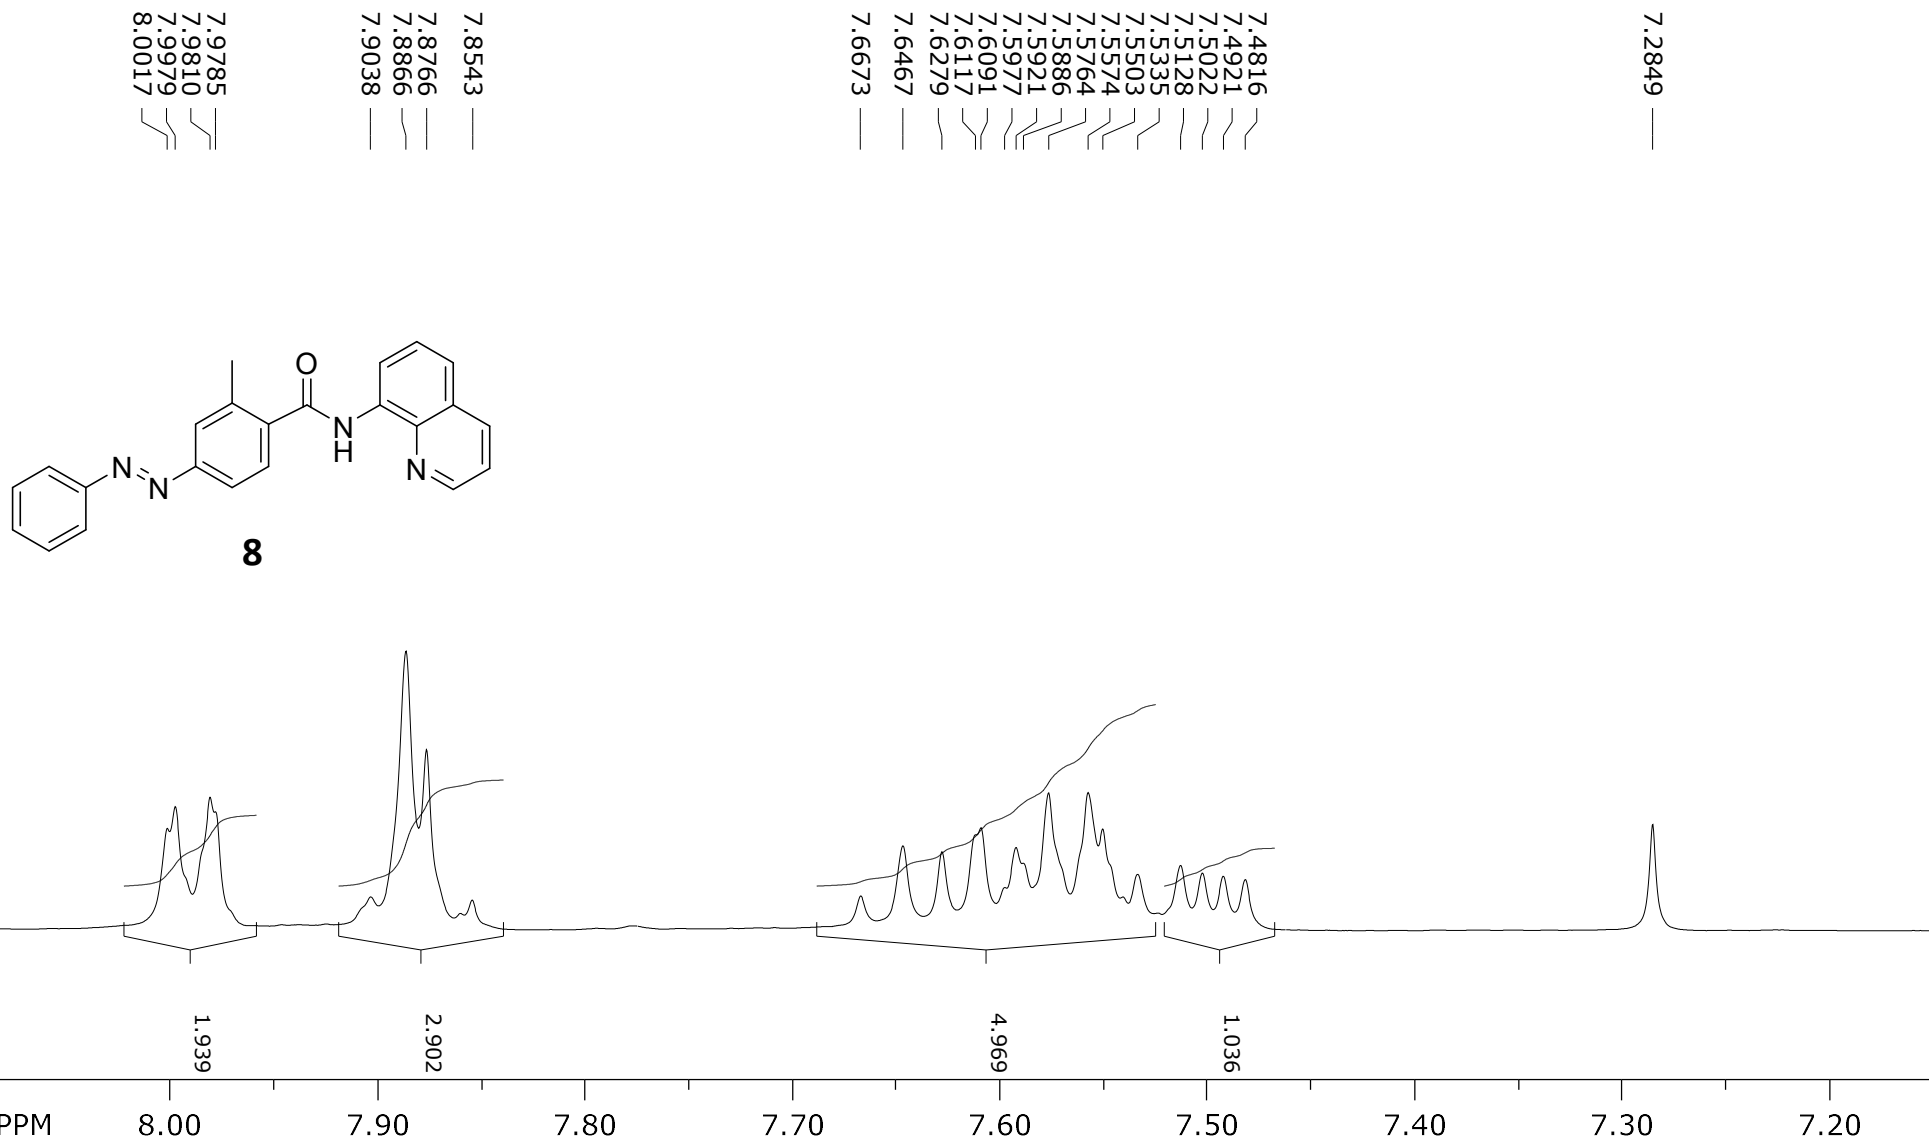

SpinWorks 4: RP 1181 A2  
C13CPD CDCI3 /opt/topspin3.5pl2/nmrdata nmrsu 2

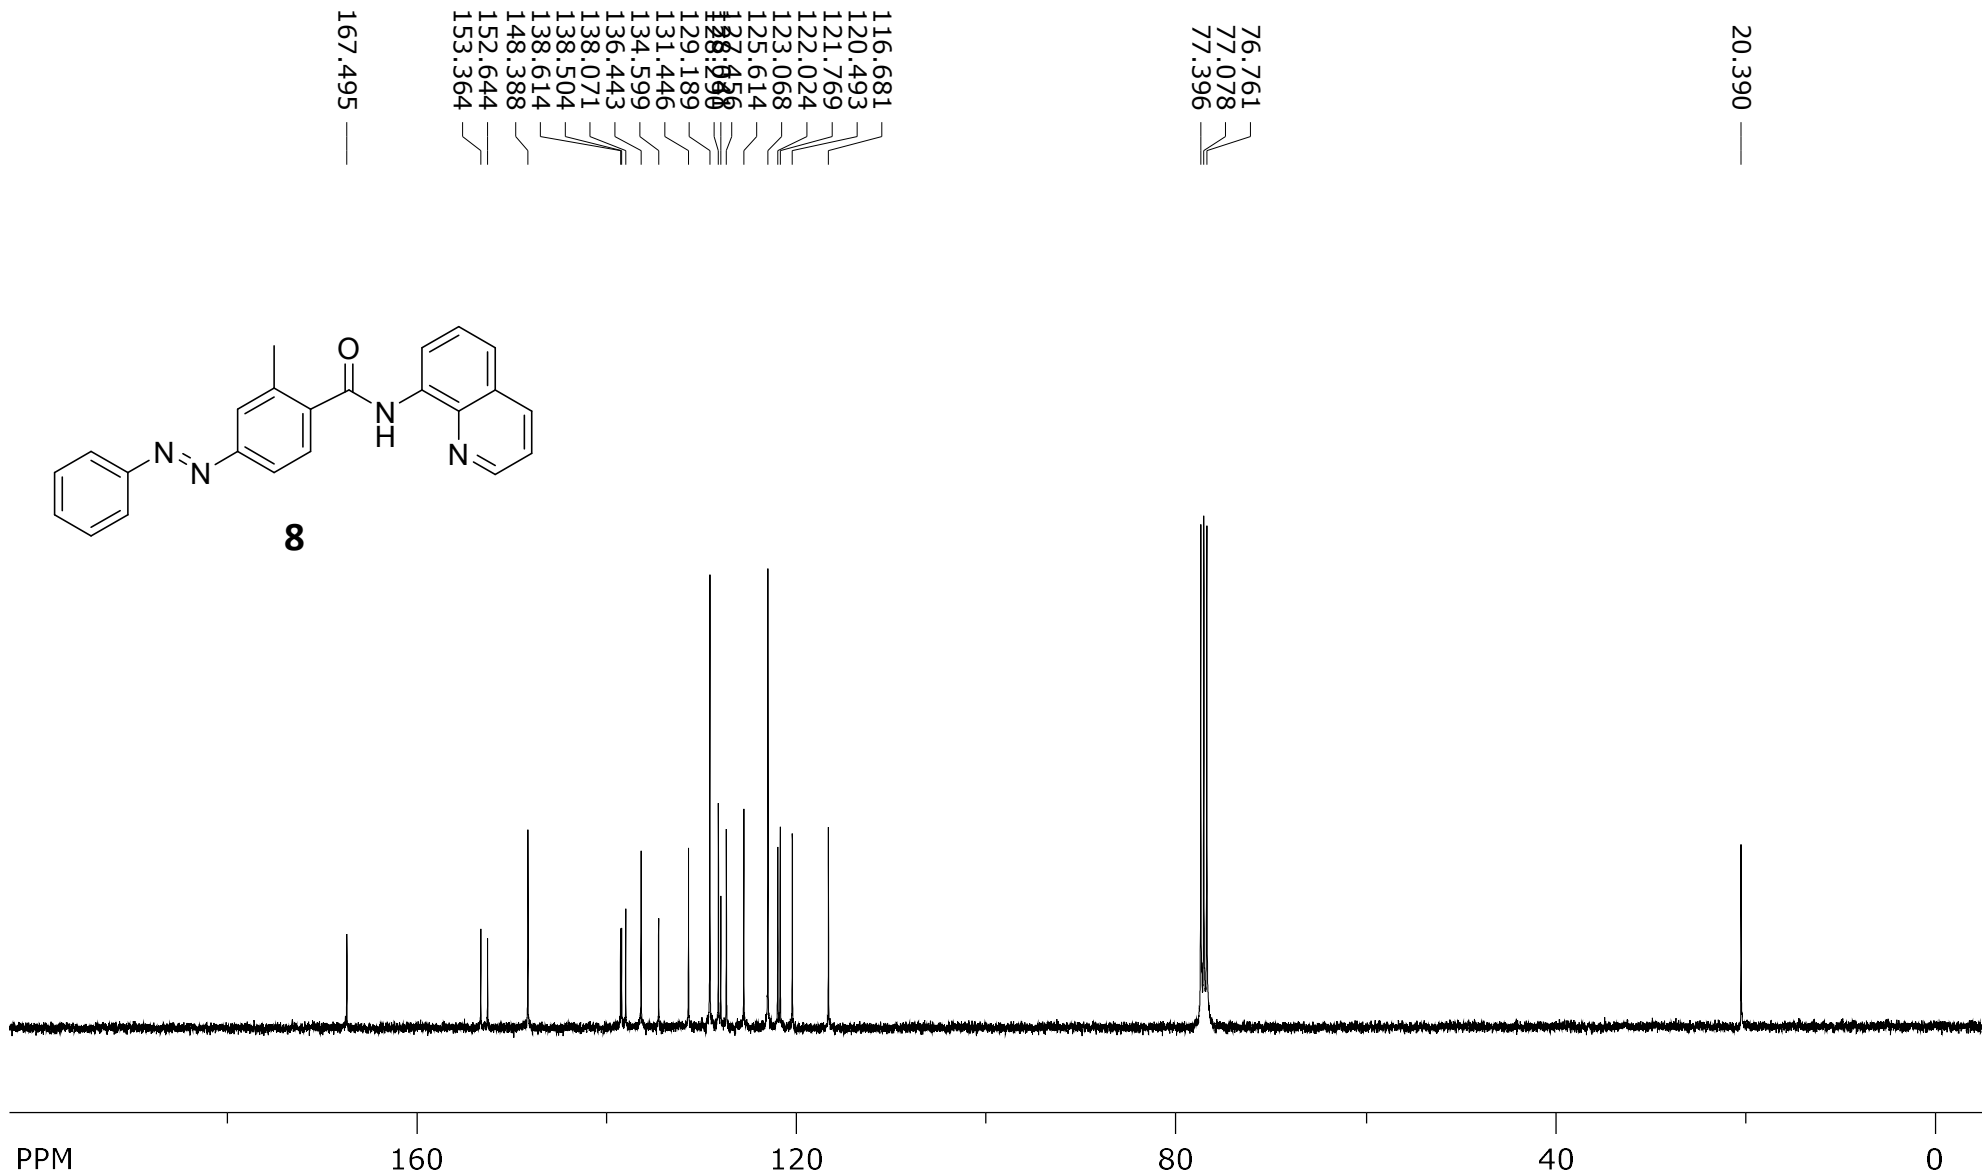

SpinWorks 4: RP 1181 A2  
C13CPD CDCl3 /opt/topspin3.5pl2/nmrdata nmrsu 2

152.644  
153.364

148.388

138.071  
138.504  
138.614

136.443

134.599

131.446

127.456  
128.041  
128.290  
129.189

125.614

123.068  
120.493  
121.769  
122.024

116.681

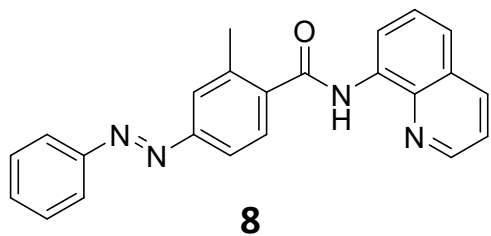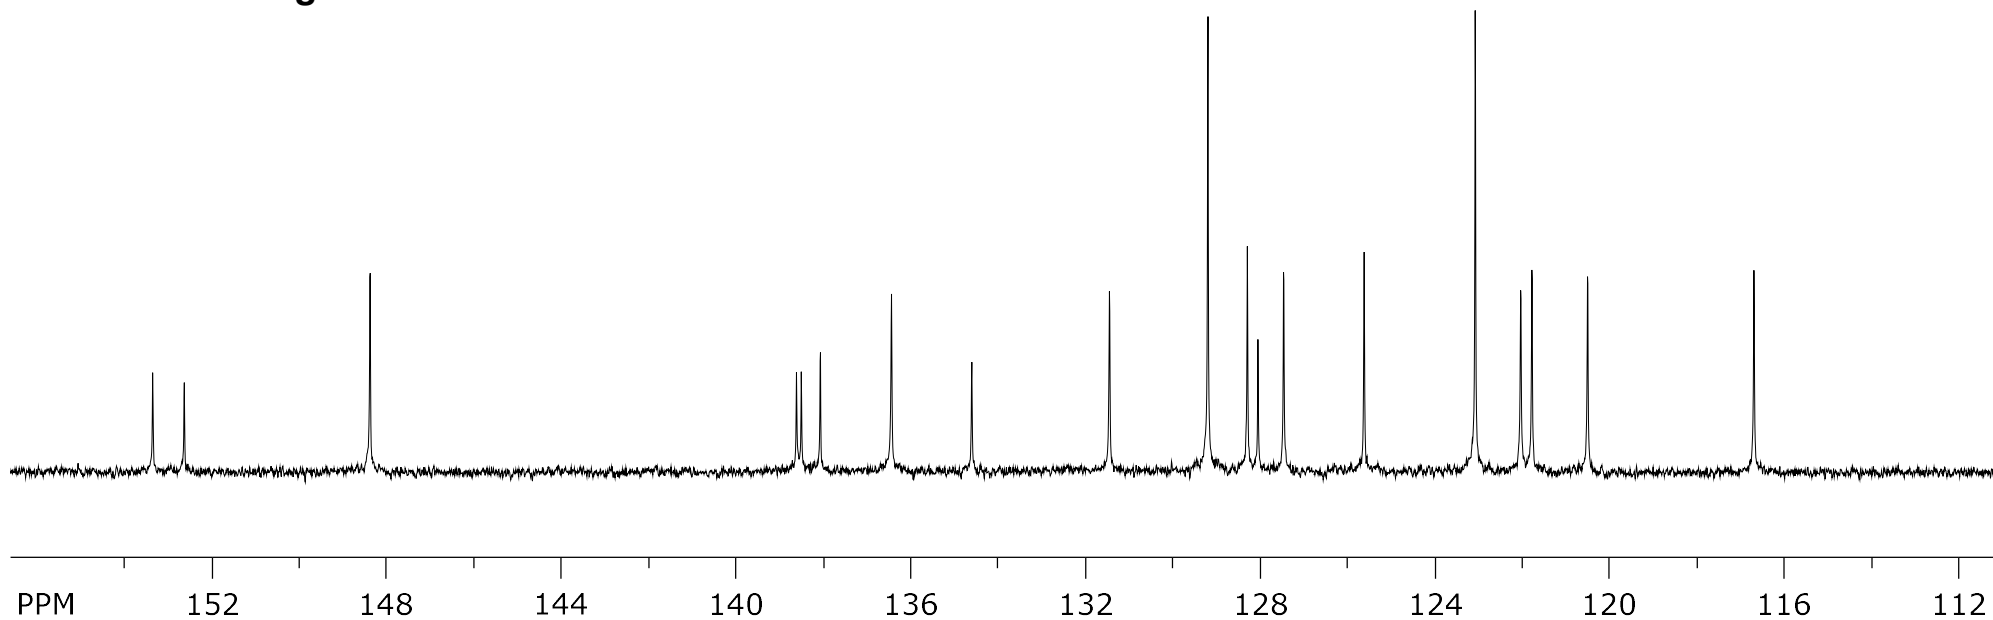

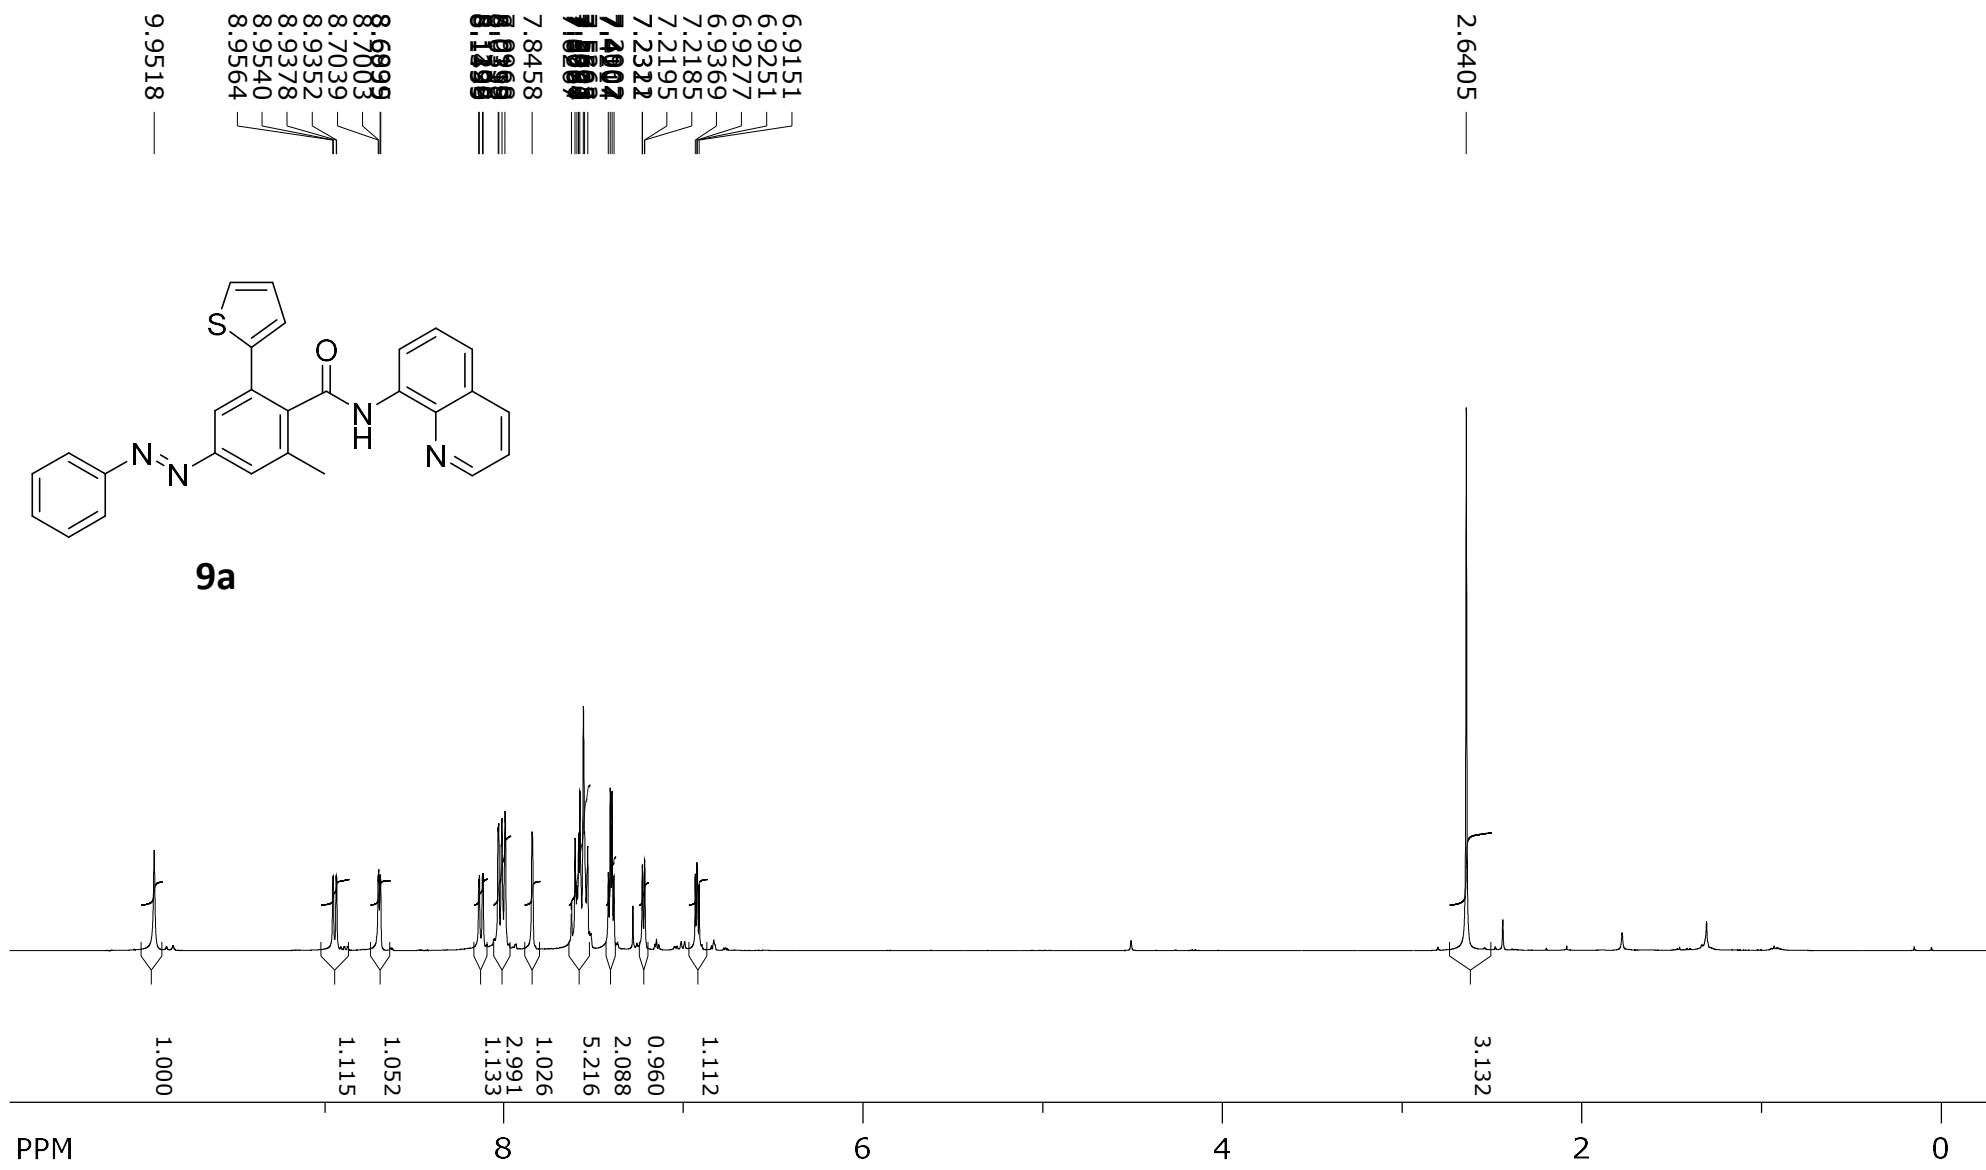

8.9352  
8.9378  
8.9540  
8.9564

8.6899  
8.6935  
8.7003  
8.7039

8.1192  
8.1228  
8.1399  
8.1435

7.9968  
8.0139  
8.0318  
8.0359

7.8458

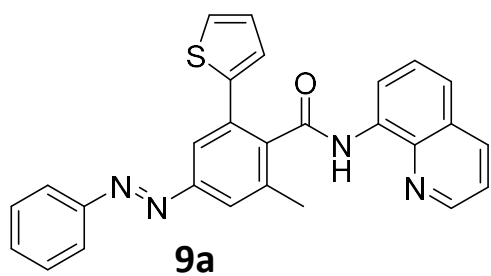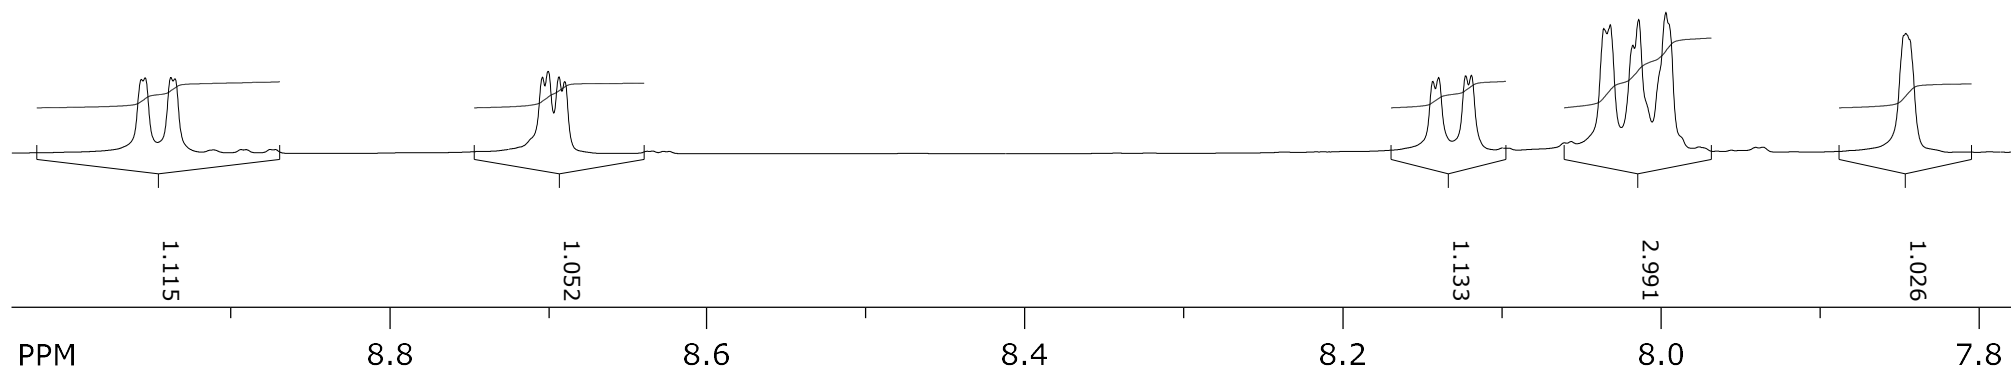

7.5363  
7.5335  
7.5603  
7.5797  
7.5871  
7.5960  
7.6064  
7.6267

7.3902  
7.4007  
7.4107  
7.4214

7.2185  
7.2195  
7.2311  
7.2322

6.9151  
6.9251  
6.9277  
6.9369

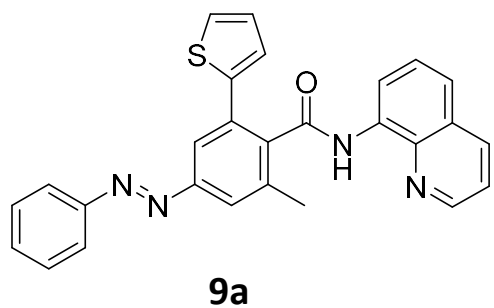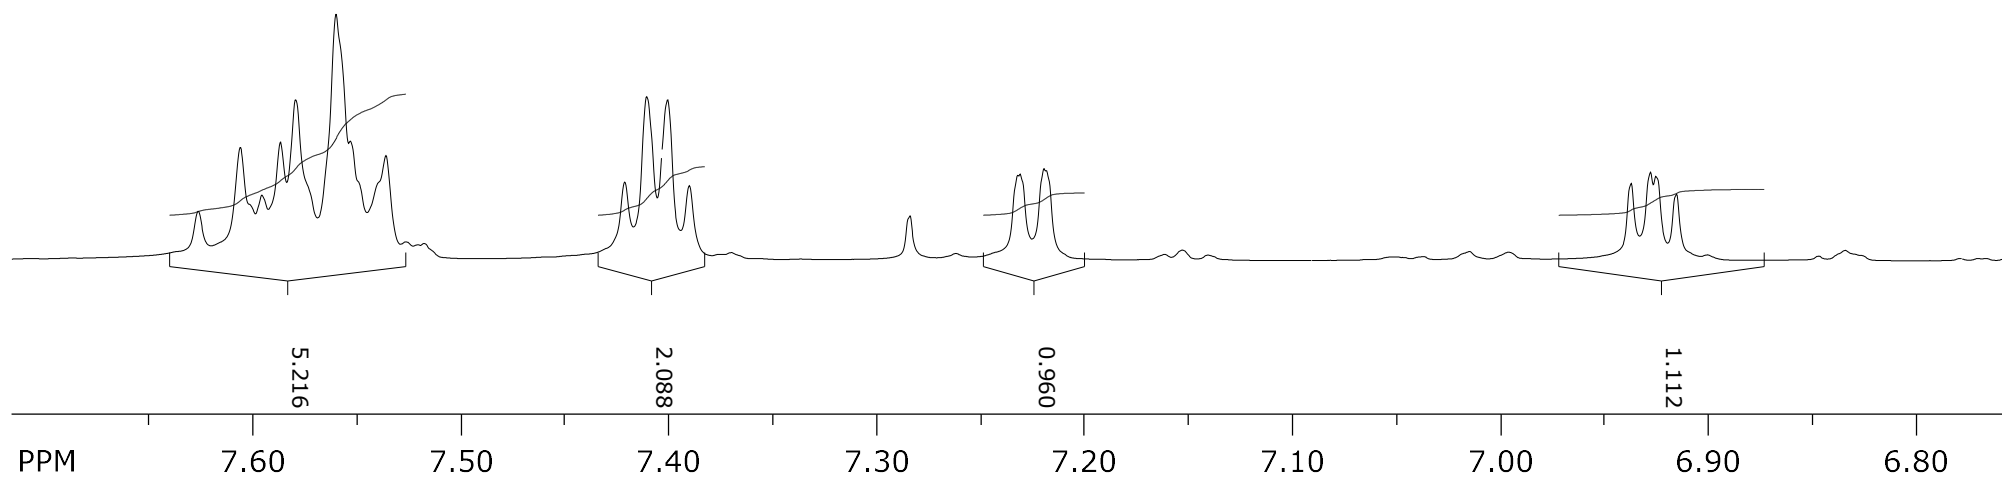

SpinWorks 4: RP\_120B REP  
C13CPD CDCl3 /opt/topspin3.5pl2/nmrdata nmrsu 9

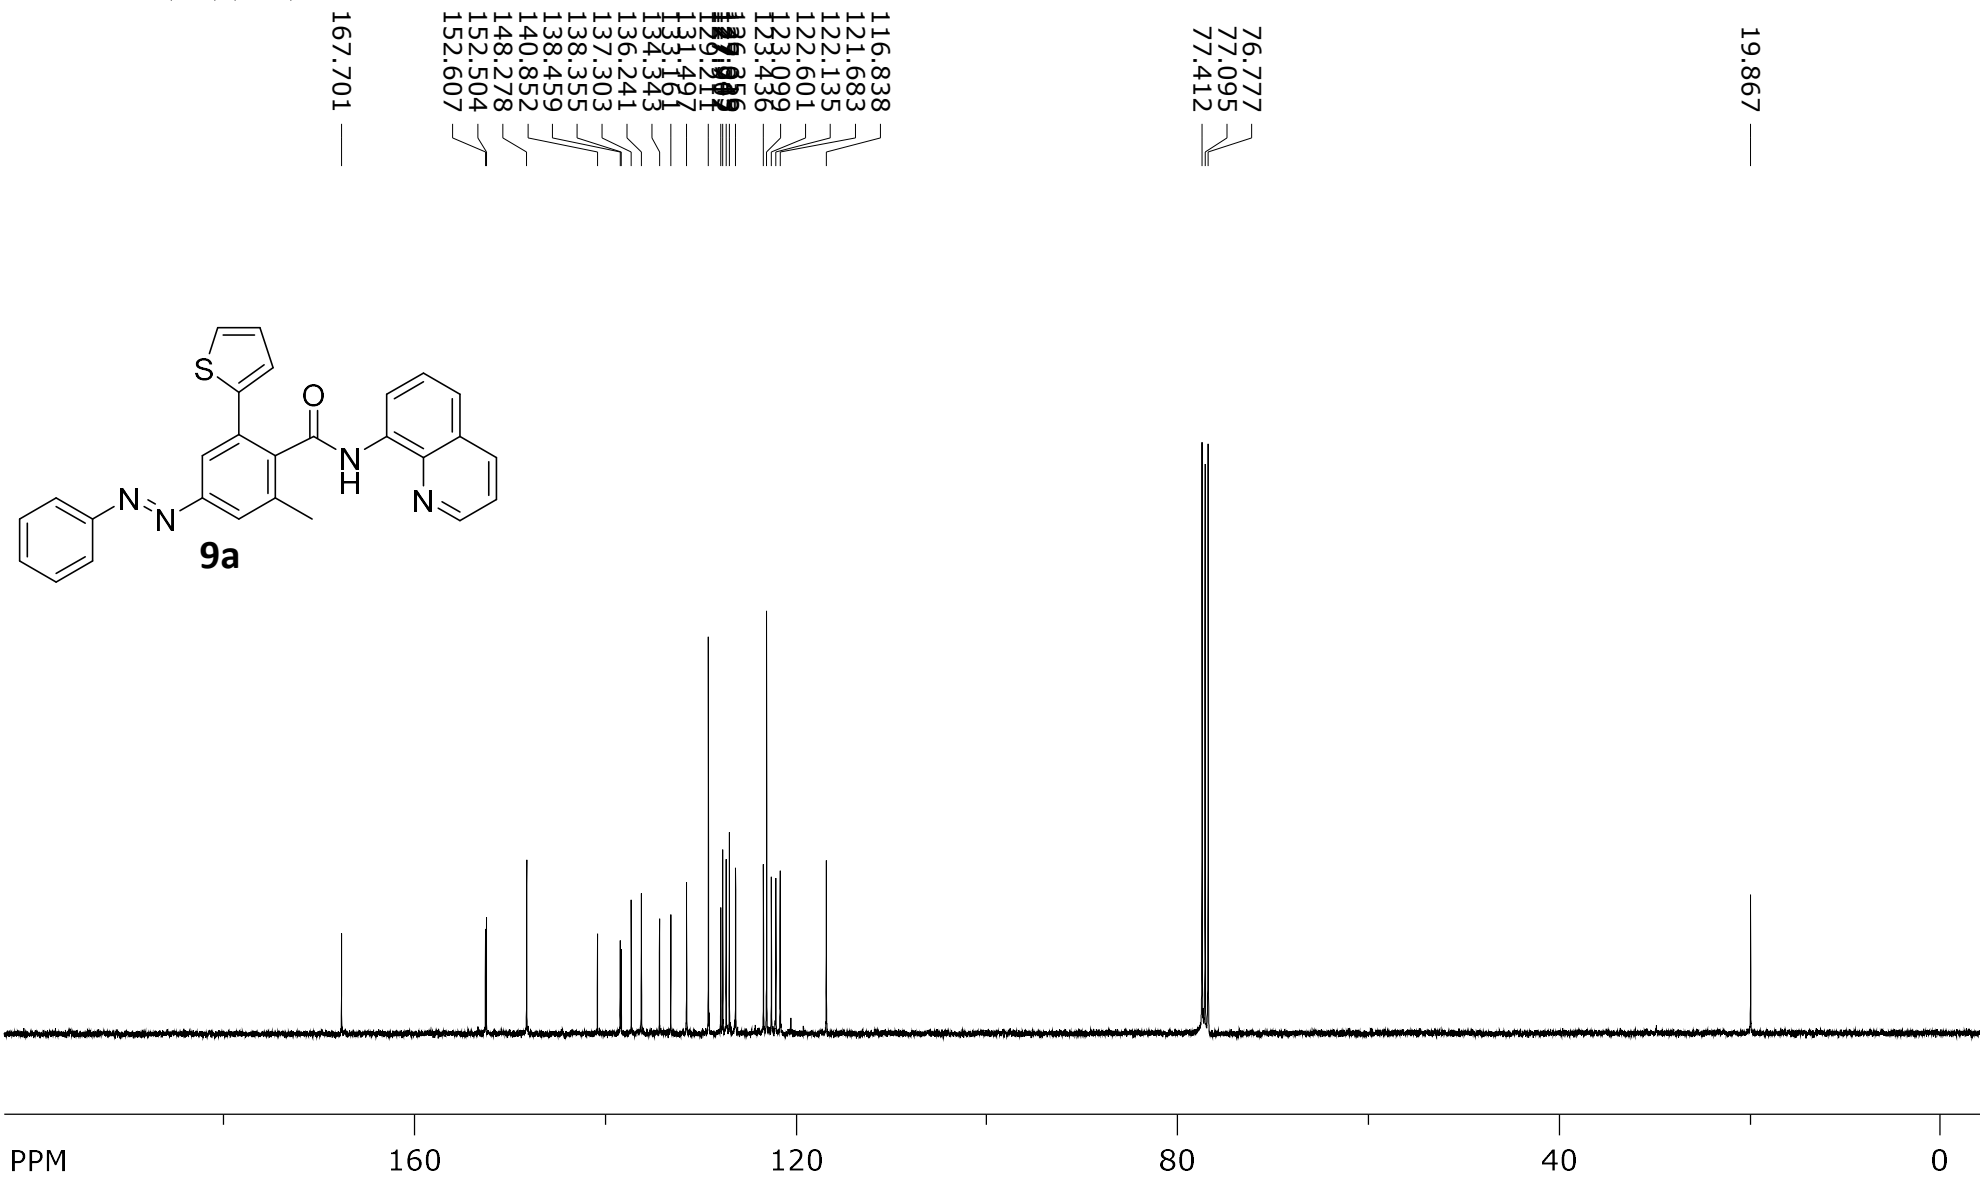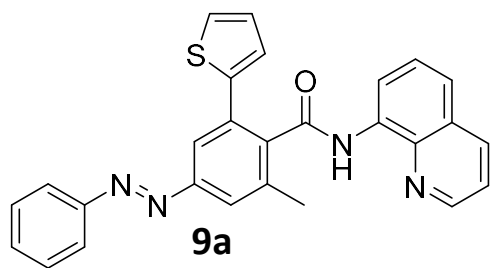

SpinWorks 4: RP 120B REP  
C13CPD CDCl3 /opt/topspin3.5pl2/nmrdata nmrsu 9

|         |         |         |         |         |         |         |         |         |         |         |         |         |         |         |         |         |         |         |         |         |
|---------|---------|---------|---------|---------|---------|---------|---------|---------|---------|---------|---------|---------|---------|---------|---------|---------|---------|---------|---------|---------|
| 152.504 | 148.278 | 140.852 | 138.355 | 137.303 | 136.241 | 134.343 | 133.161 | 131.497 | 129.211 | 127.912 | 127.707 | 127.345 | 127.013 | 126.356 | 123.436 | 123.099 | 122.601 | 122.135 | 121.683 | 116.838 |
|---------|---------|---------|---------|---------|---------|---------|---------|---------|---------|---------|---------|---------|---------|---------|---------|---------|---------|---------|---------|---------|

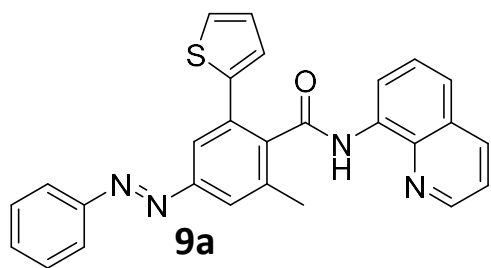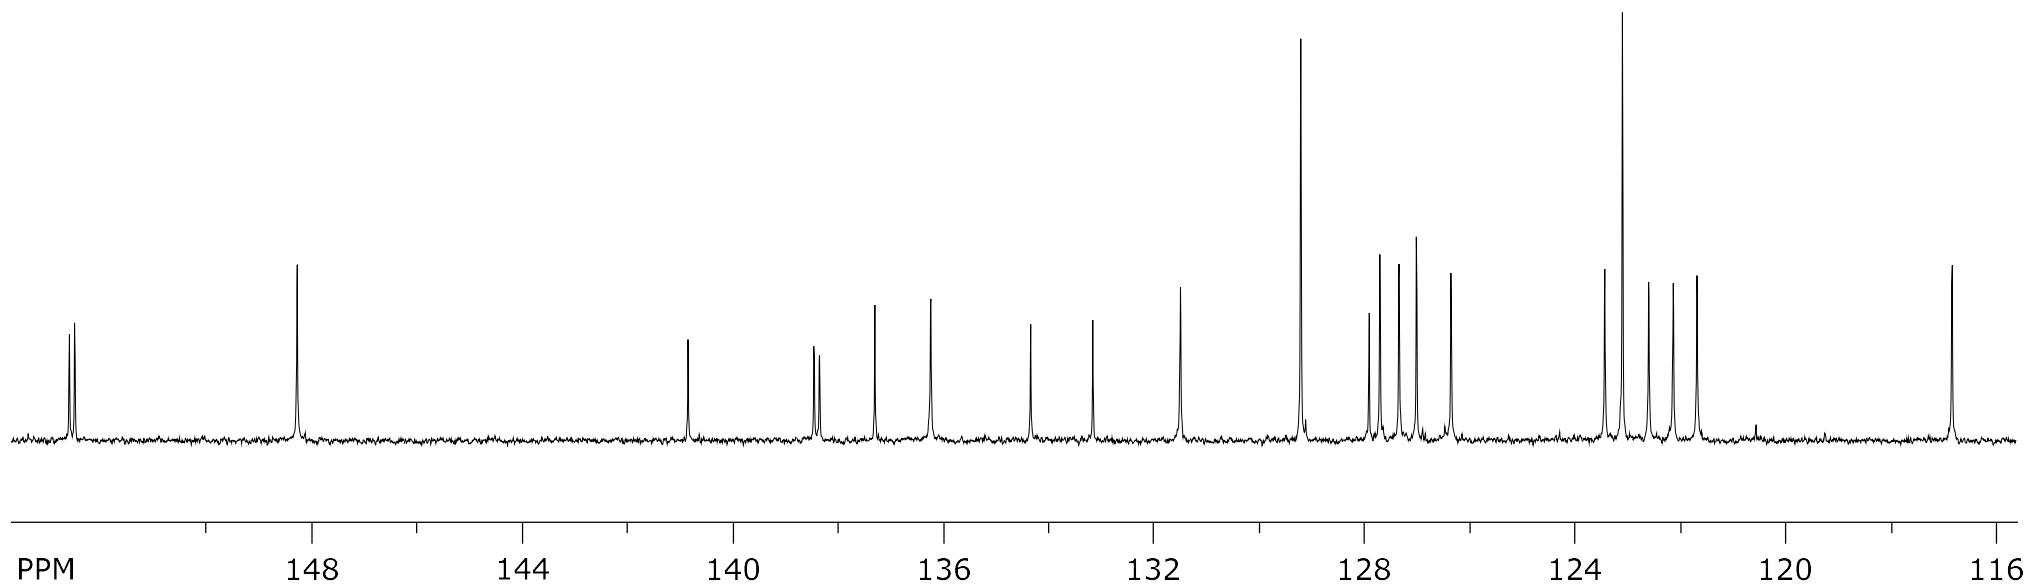



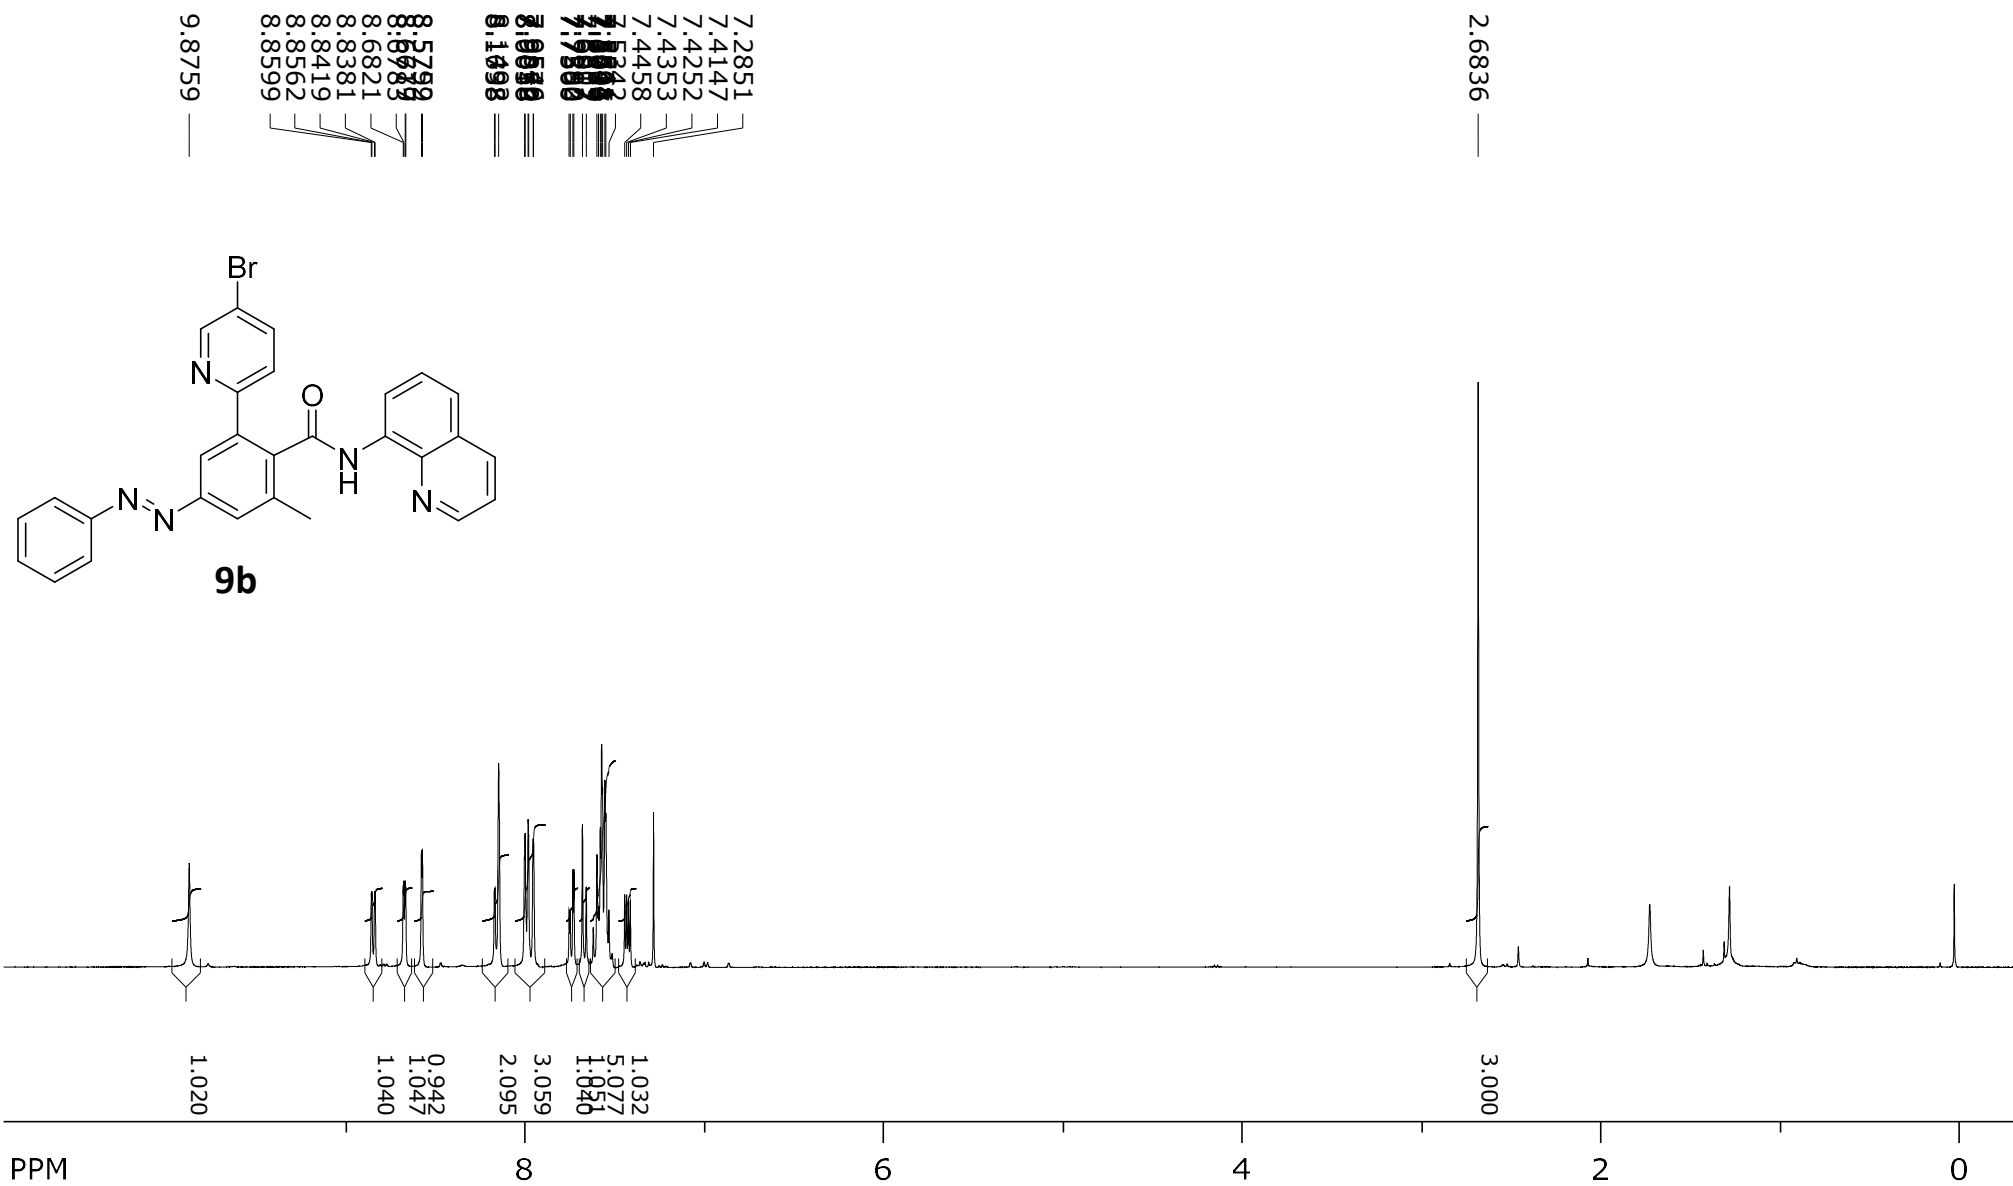

8.8381  
8.8419  
8.8562  
8.8599

8.6679  
8.6717  
8.6783  
8.6821

8.5752  
8.5799

8.1492  
8.1698  
8.1735

7.9546  
7.9570  
7.9822  
7.9850  
8.0018  
8.0056

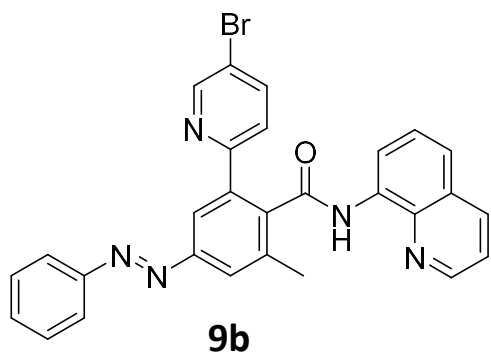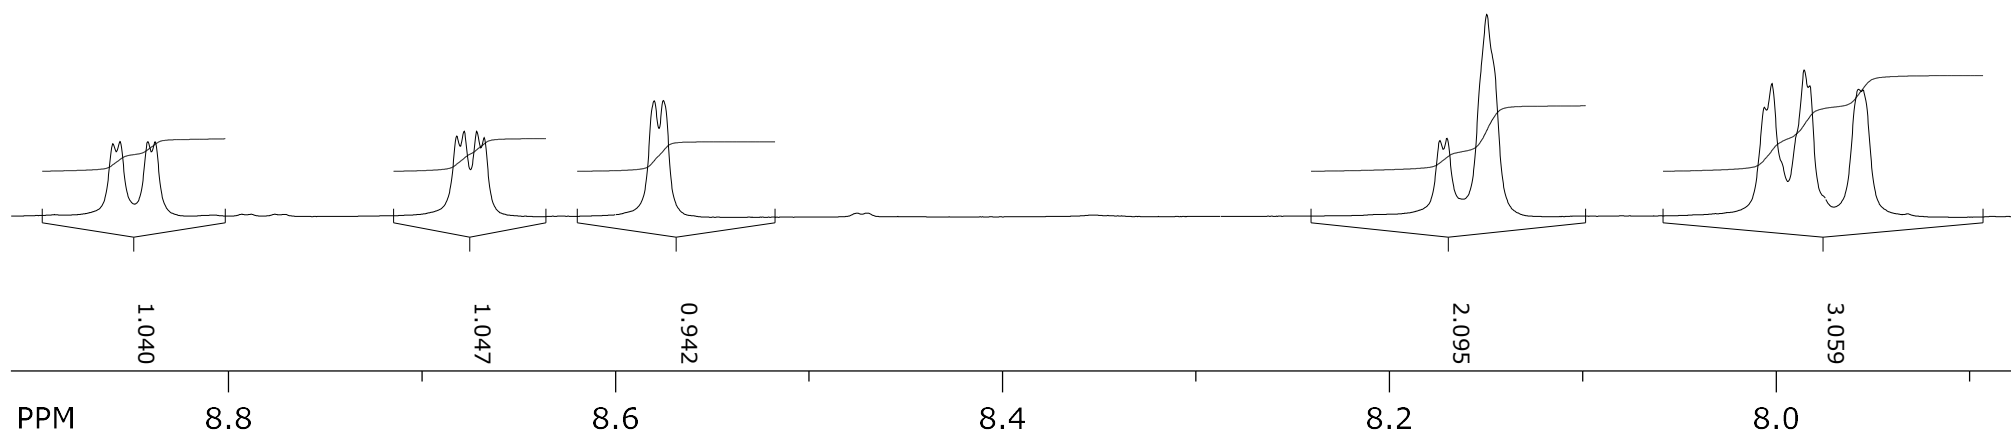

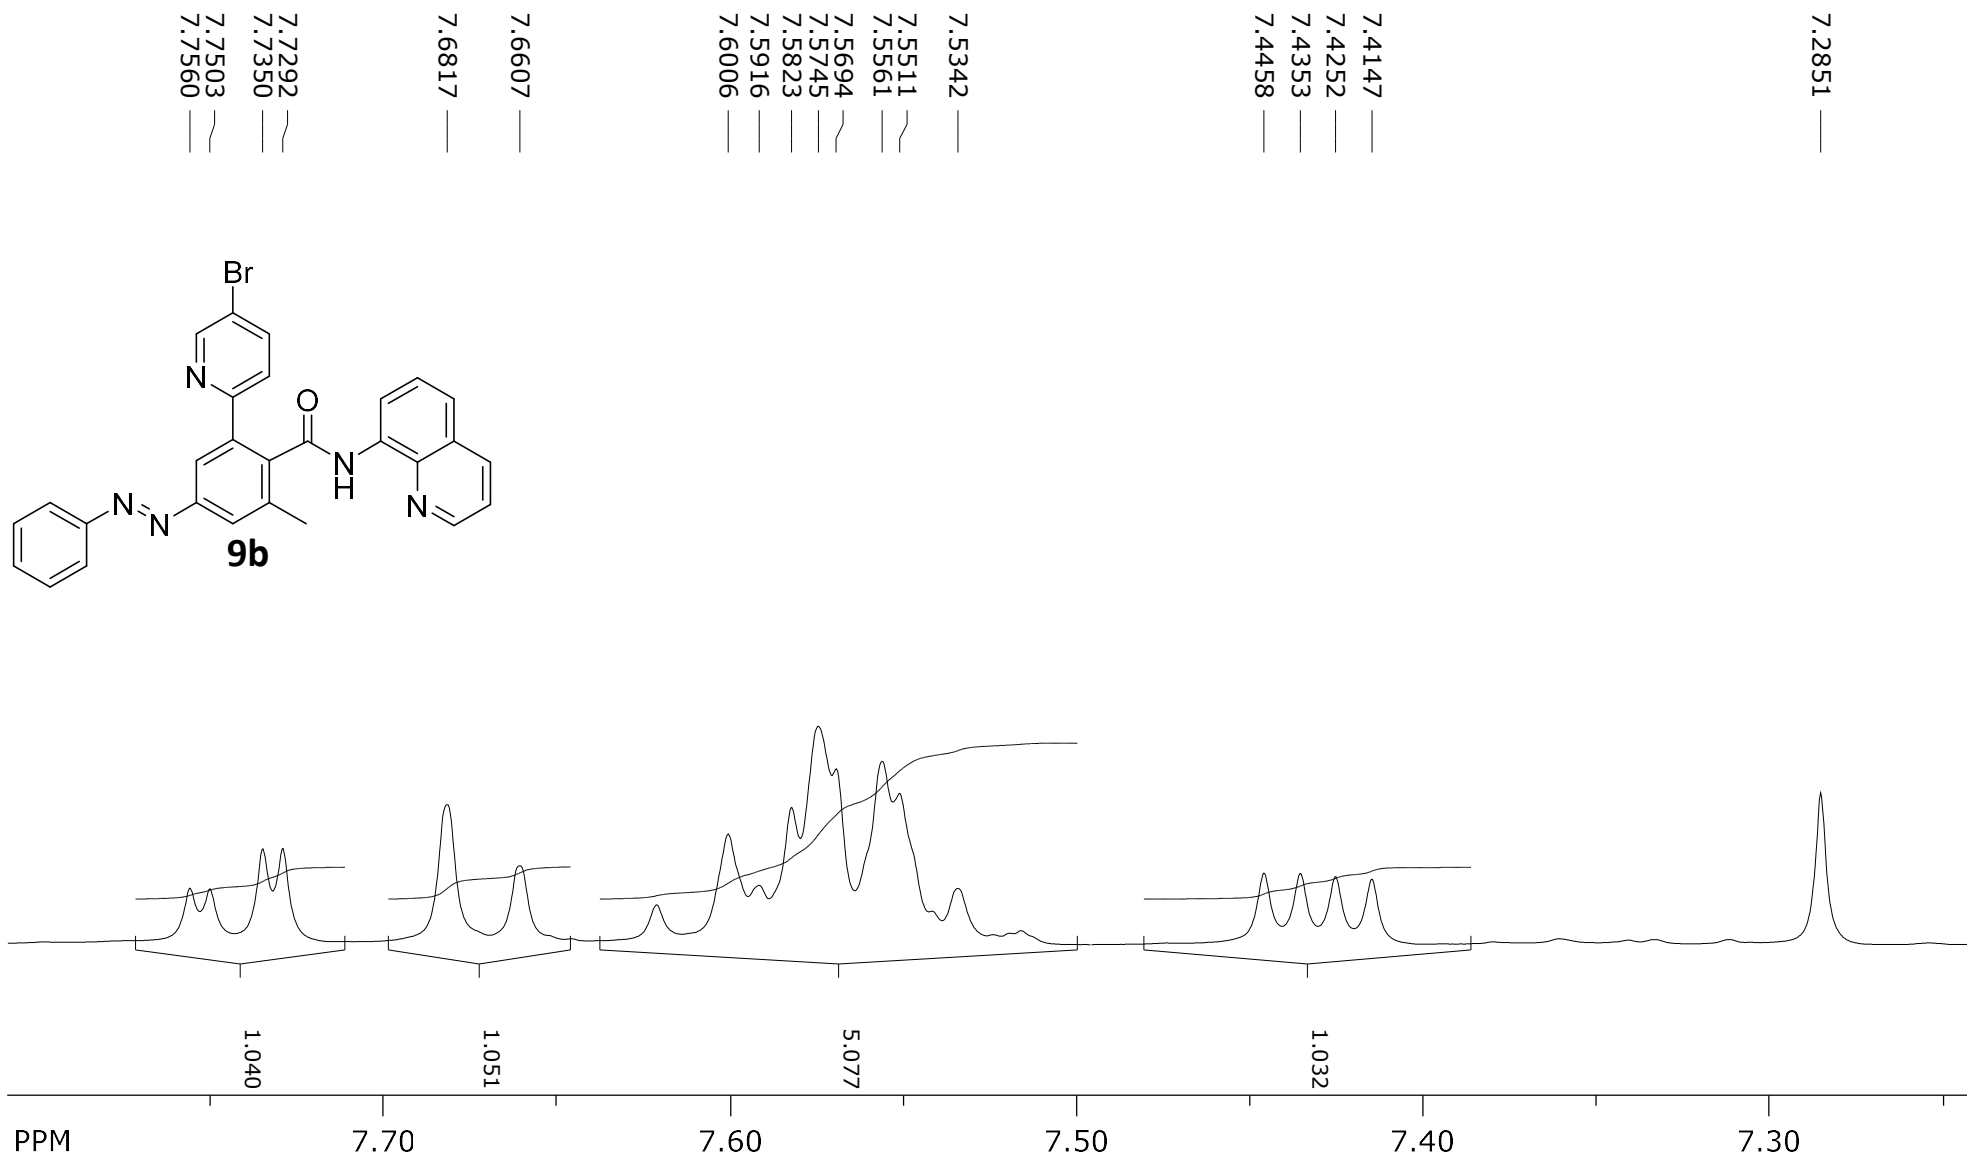

SpinWorks 4: RP-1186 Rep B2  
C13CPD256 CDCl3 /opt/topspin3.5pl2/nmrdata nmrsu 3

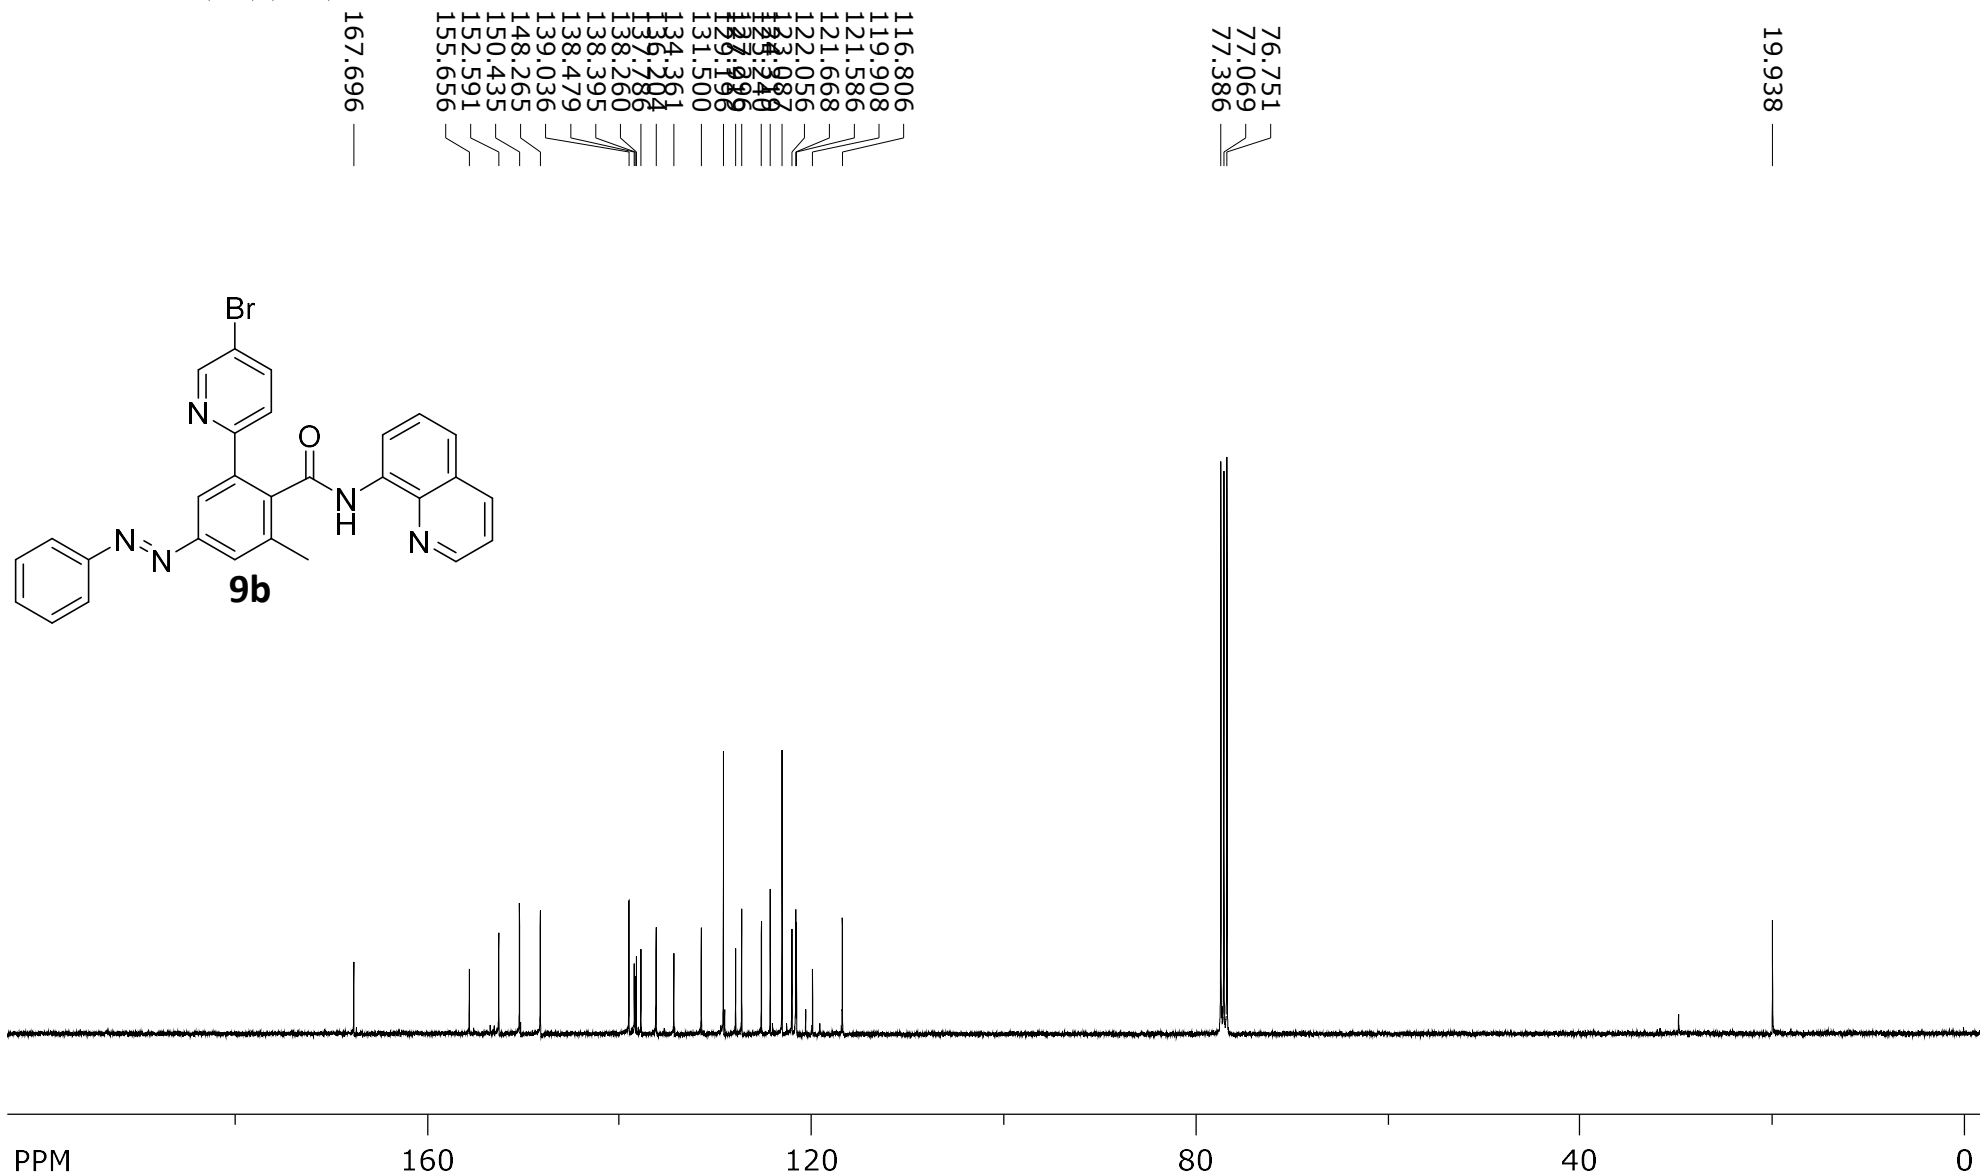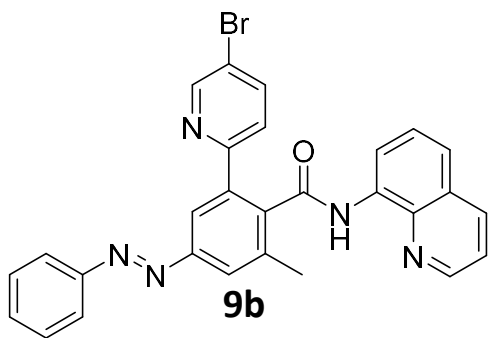

SpinWorks 4: RP-1186 Rep B2  
C13CPD256 CDCl3 /opt/topspin3.5pl2/nmrdata nmrsu 3

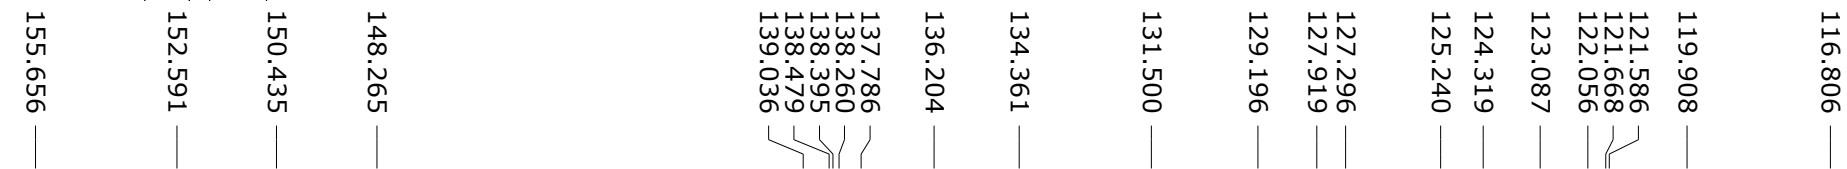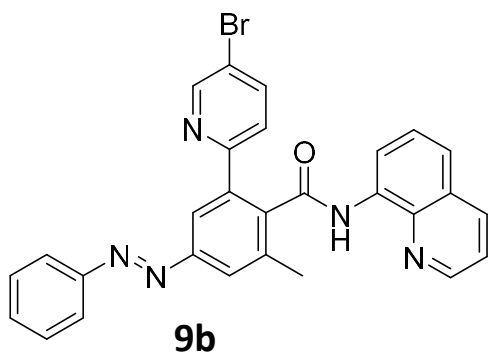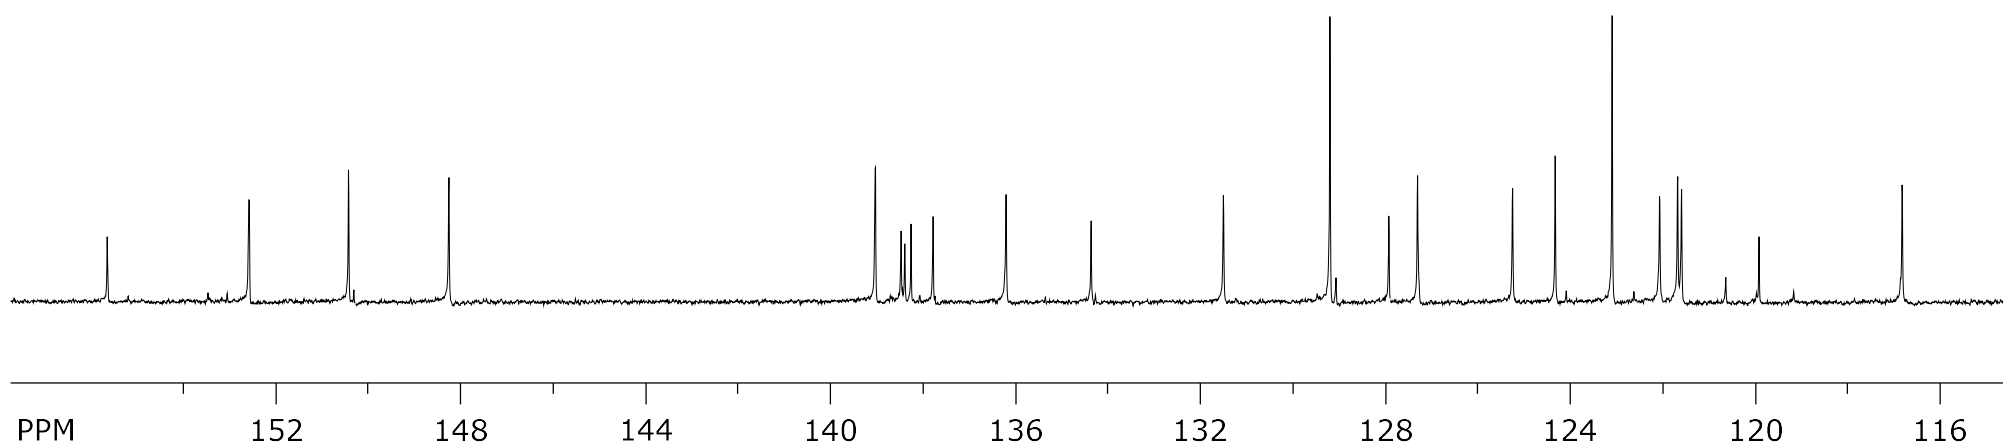

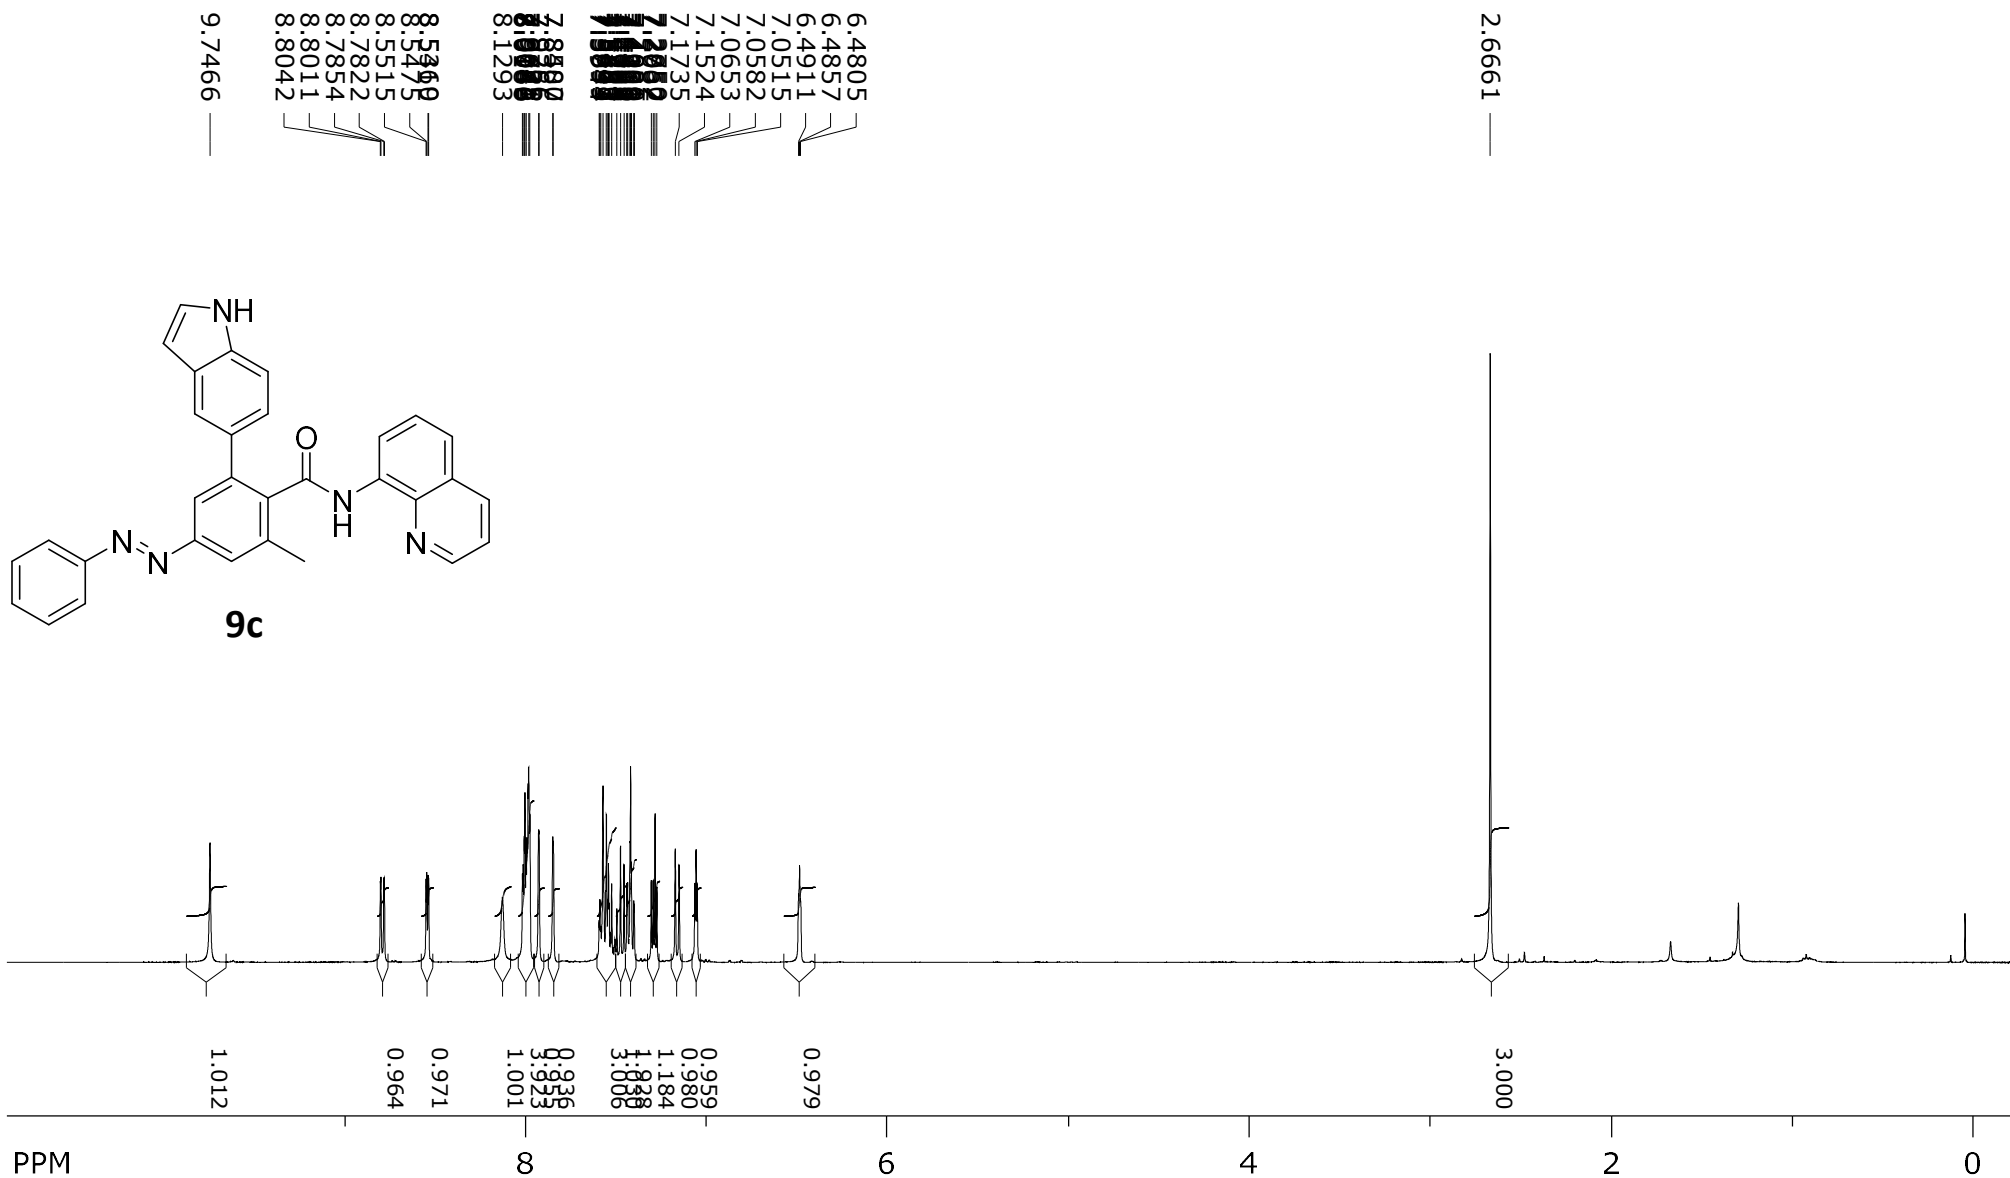

8.7822  
8.7854  
8.8011  
8.8042

8.5369  
8.5410  
8.5475  
8.5515

8.1293

7.9775  
7.9841  
7.9982  
8.0046  
8.0086  
8.0145  
8.0186

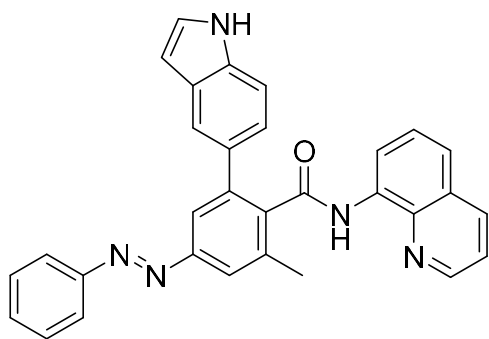

9c

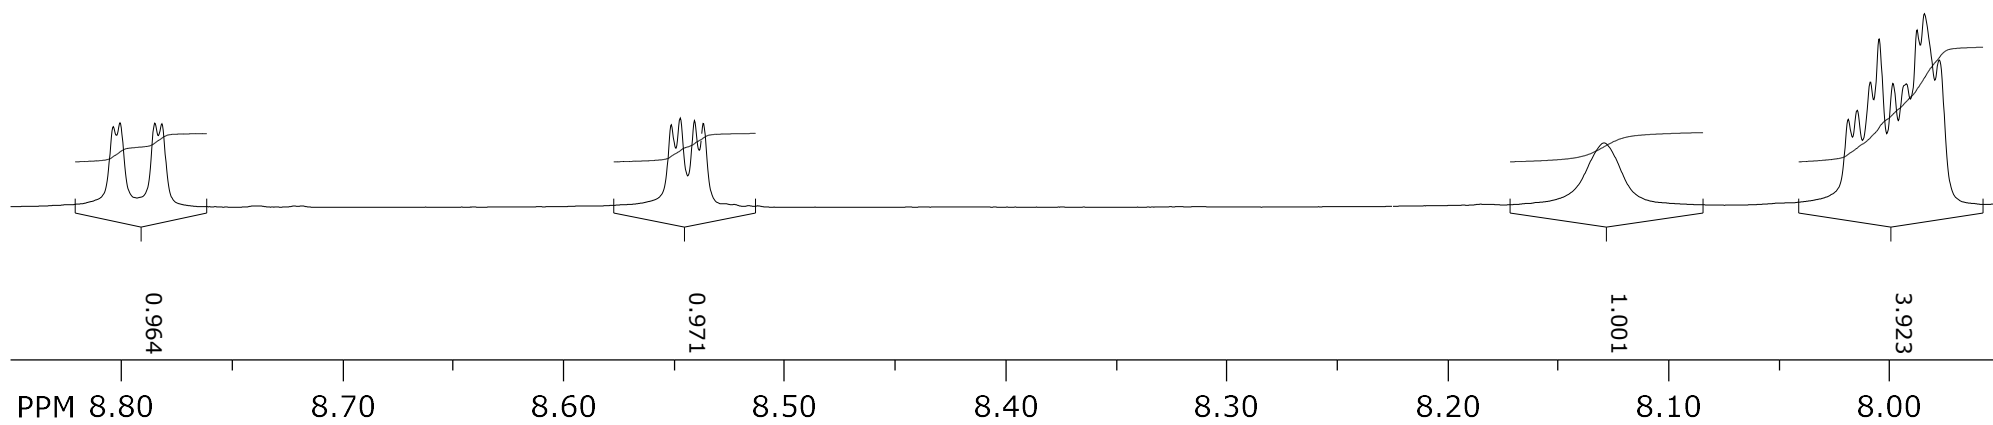

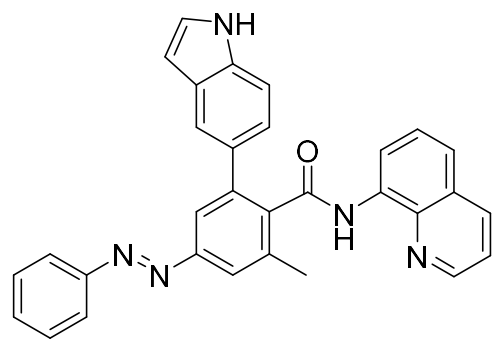

9c

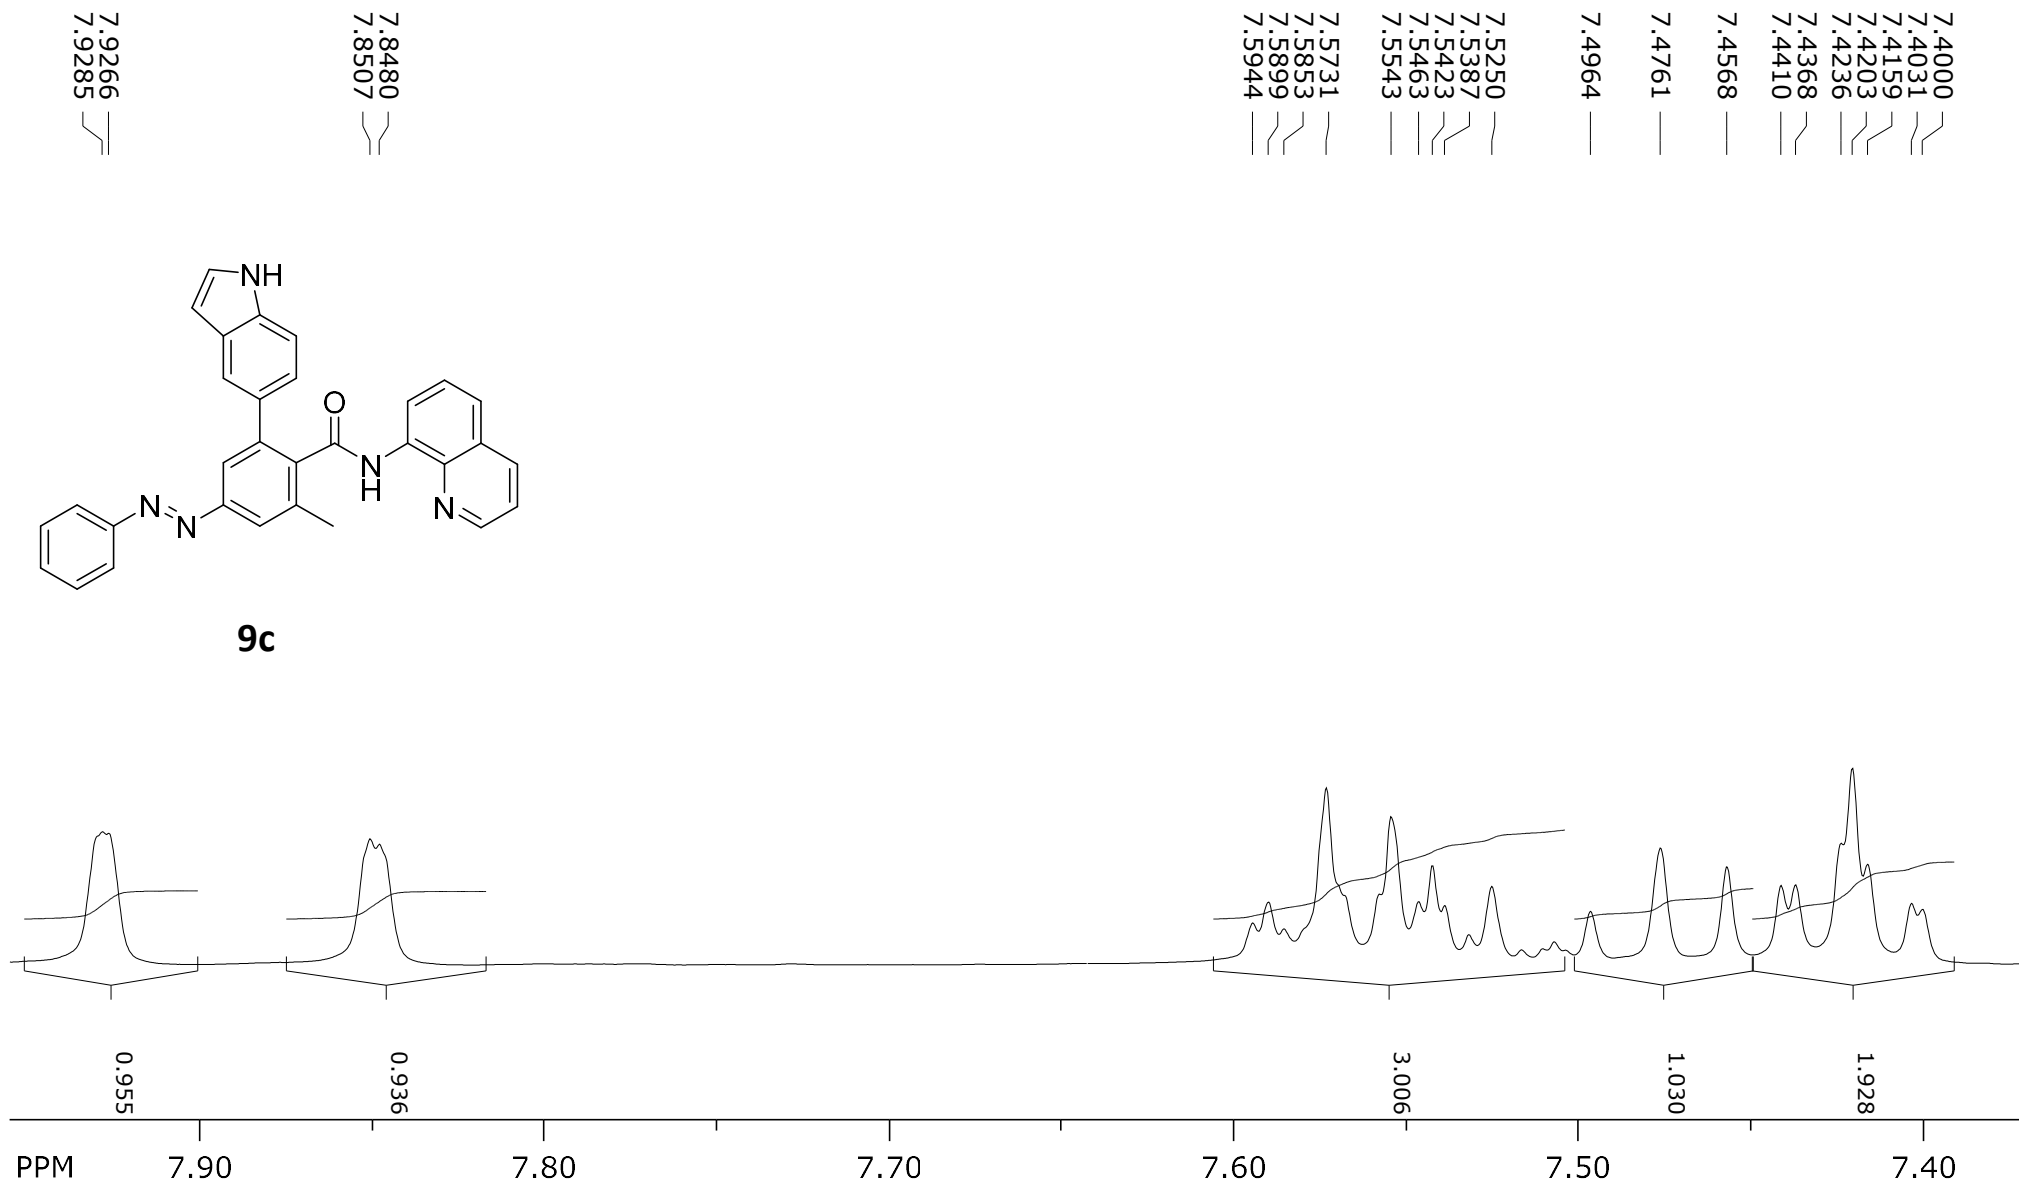



SpinWorks 4: RP-1211B2

7.2750  
7.2852  
7.2957  
7.3062

7.1524  
7.1735

7.0515  
7.0582  
7.0653

6.4805  
6.4857  
6.4911

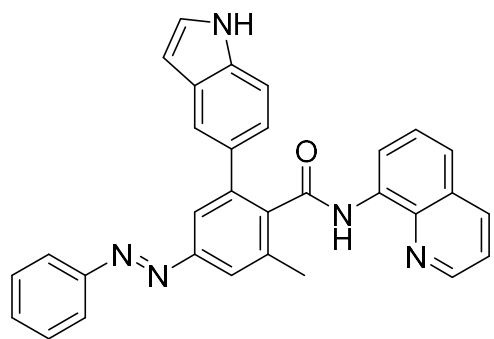

**9c**

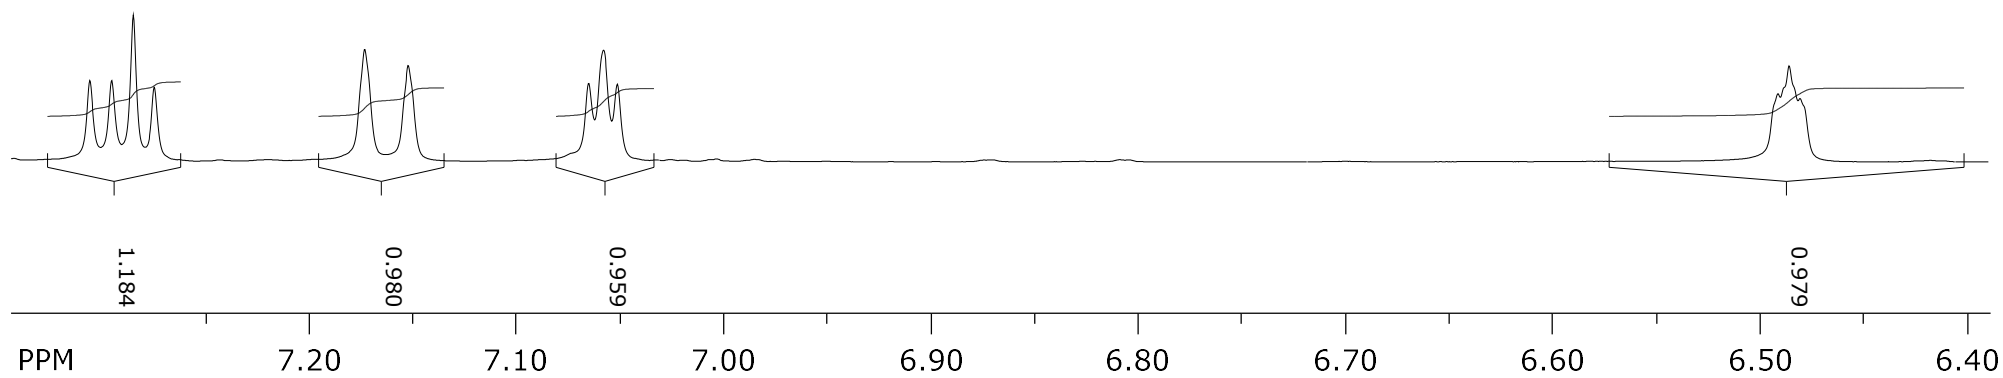

SpinWorks 4: RP 1211 B2  
C13CPD CDCl3 /opt/topspin3.5pl2/nmrdata nmrsu 6

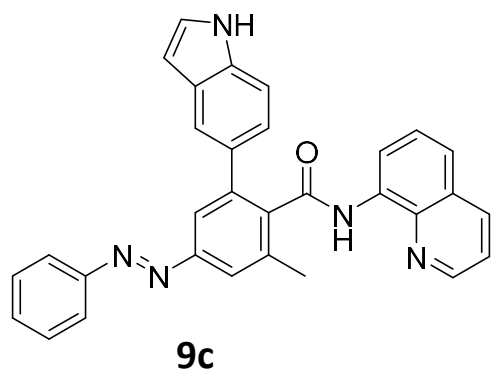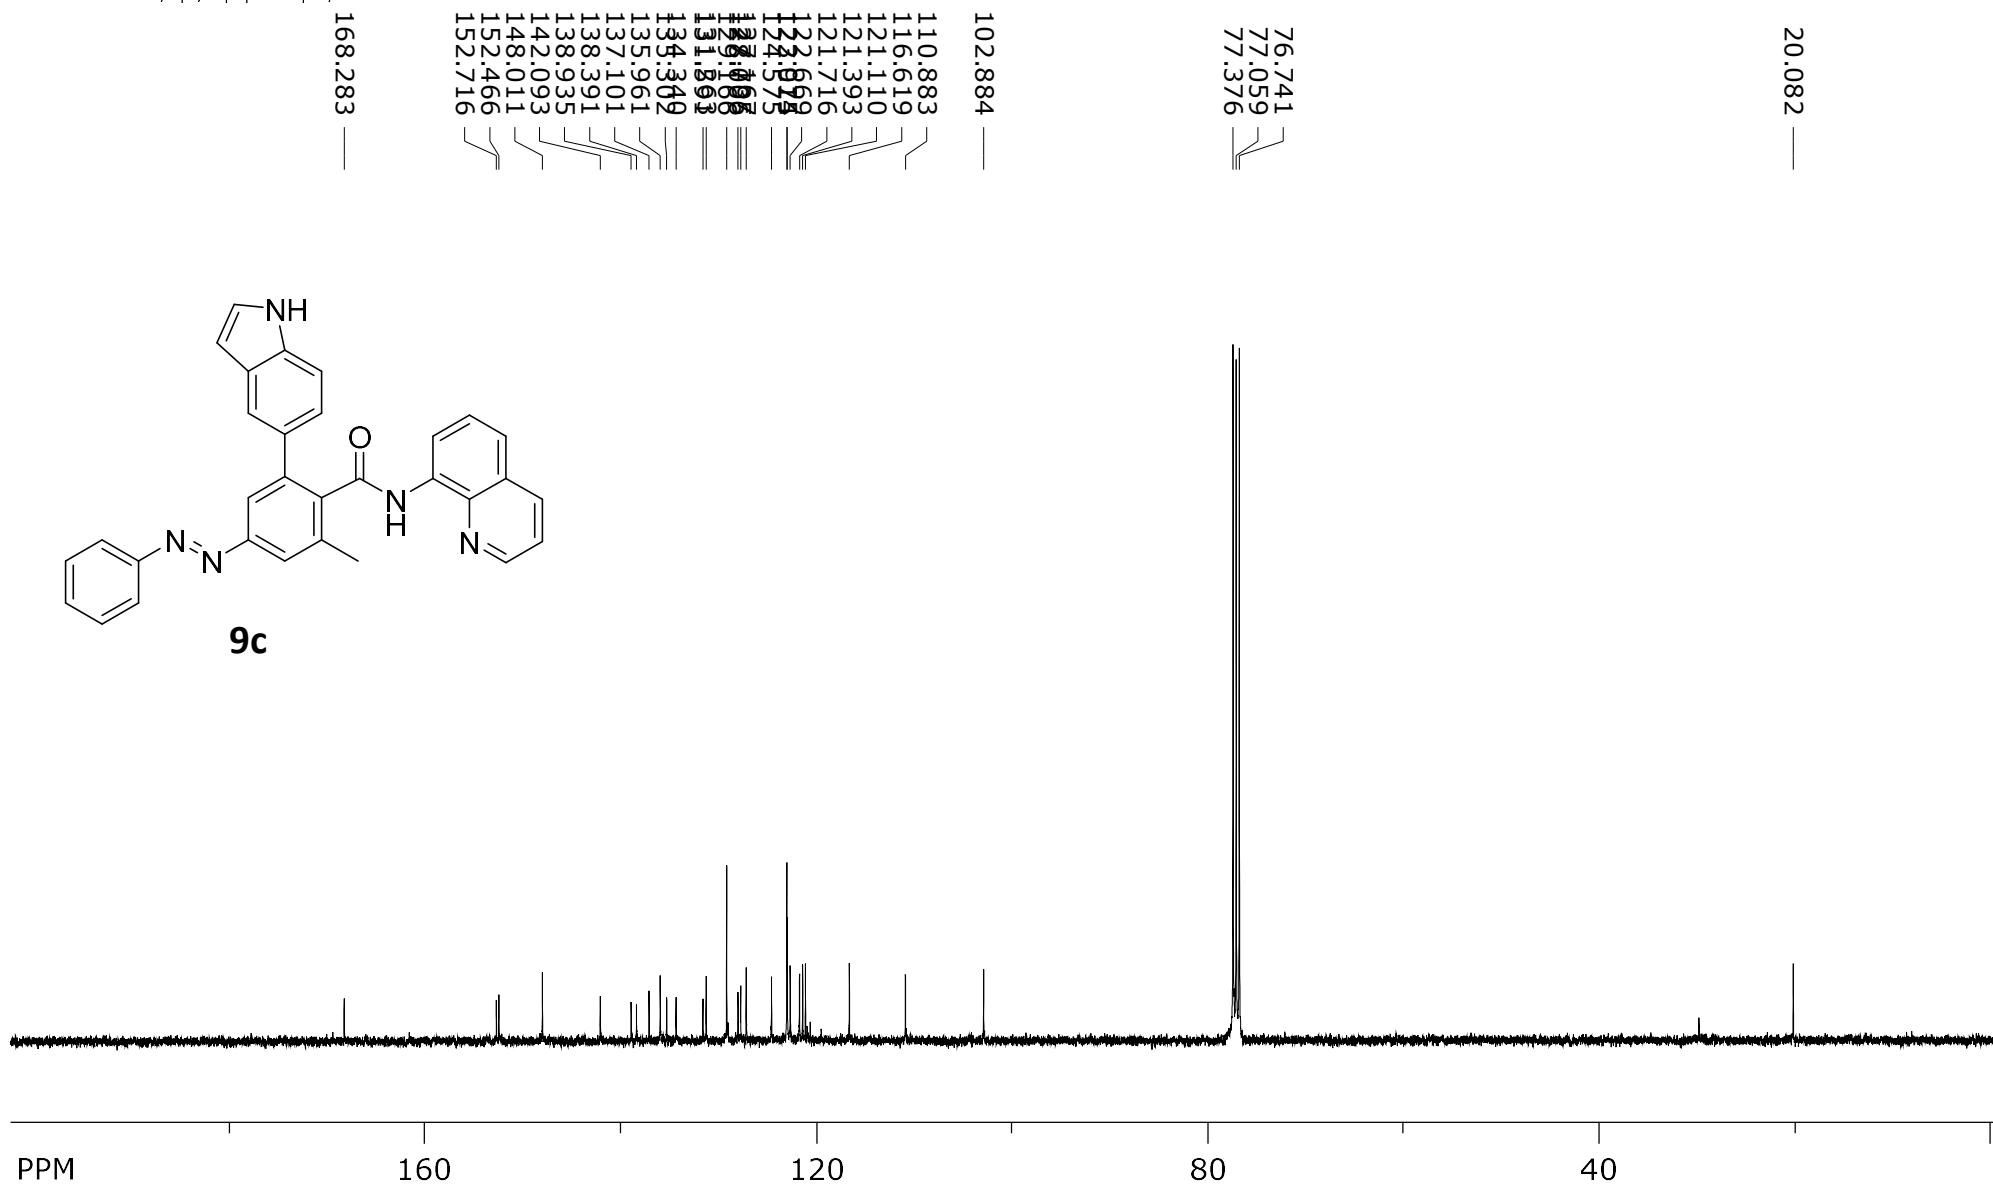

SpinWorks 4: RP 1211 B2  
C13CPD CDCl3 /opt/topspin3.5pl2/nmrdata nmrsu 6

152.466  
152.716

148.011

142.093

138.391  
138.935

137.101

135.961

134.340

131.263  
131.591

127.167  
127.735  
128.006  
129.166

124.575  
122.974  
122.669  
121.716  
121.393  
121.110

116.619

110.883

102.884



9c

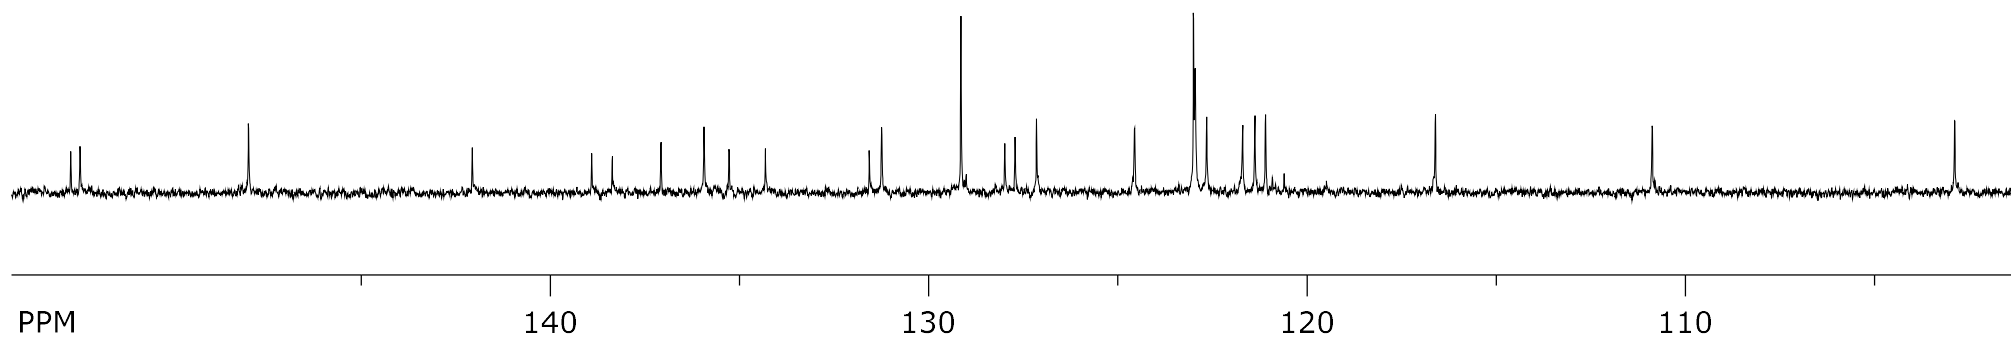

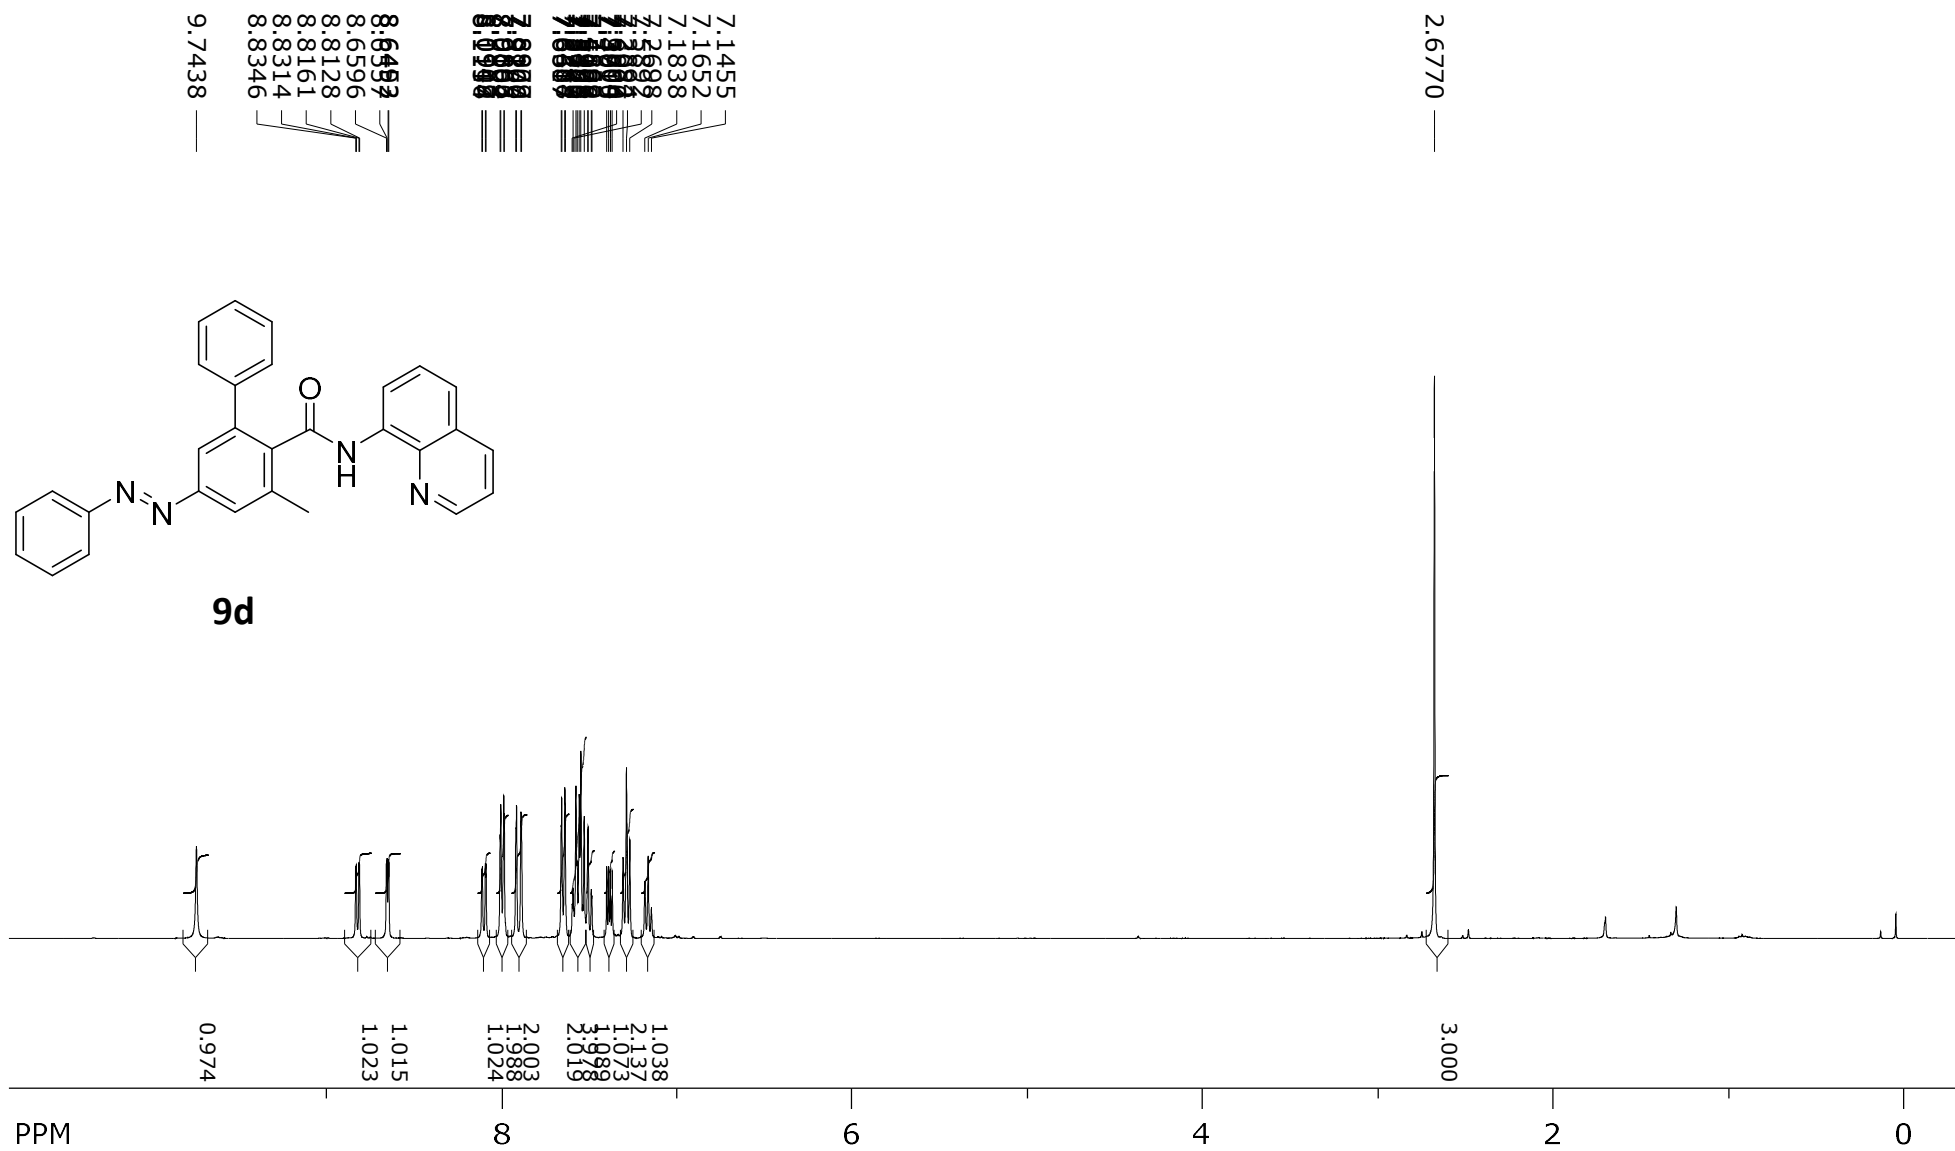

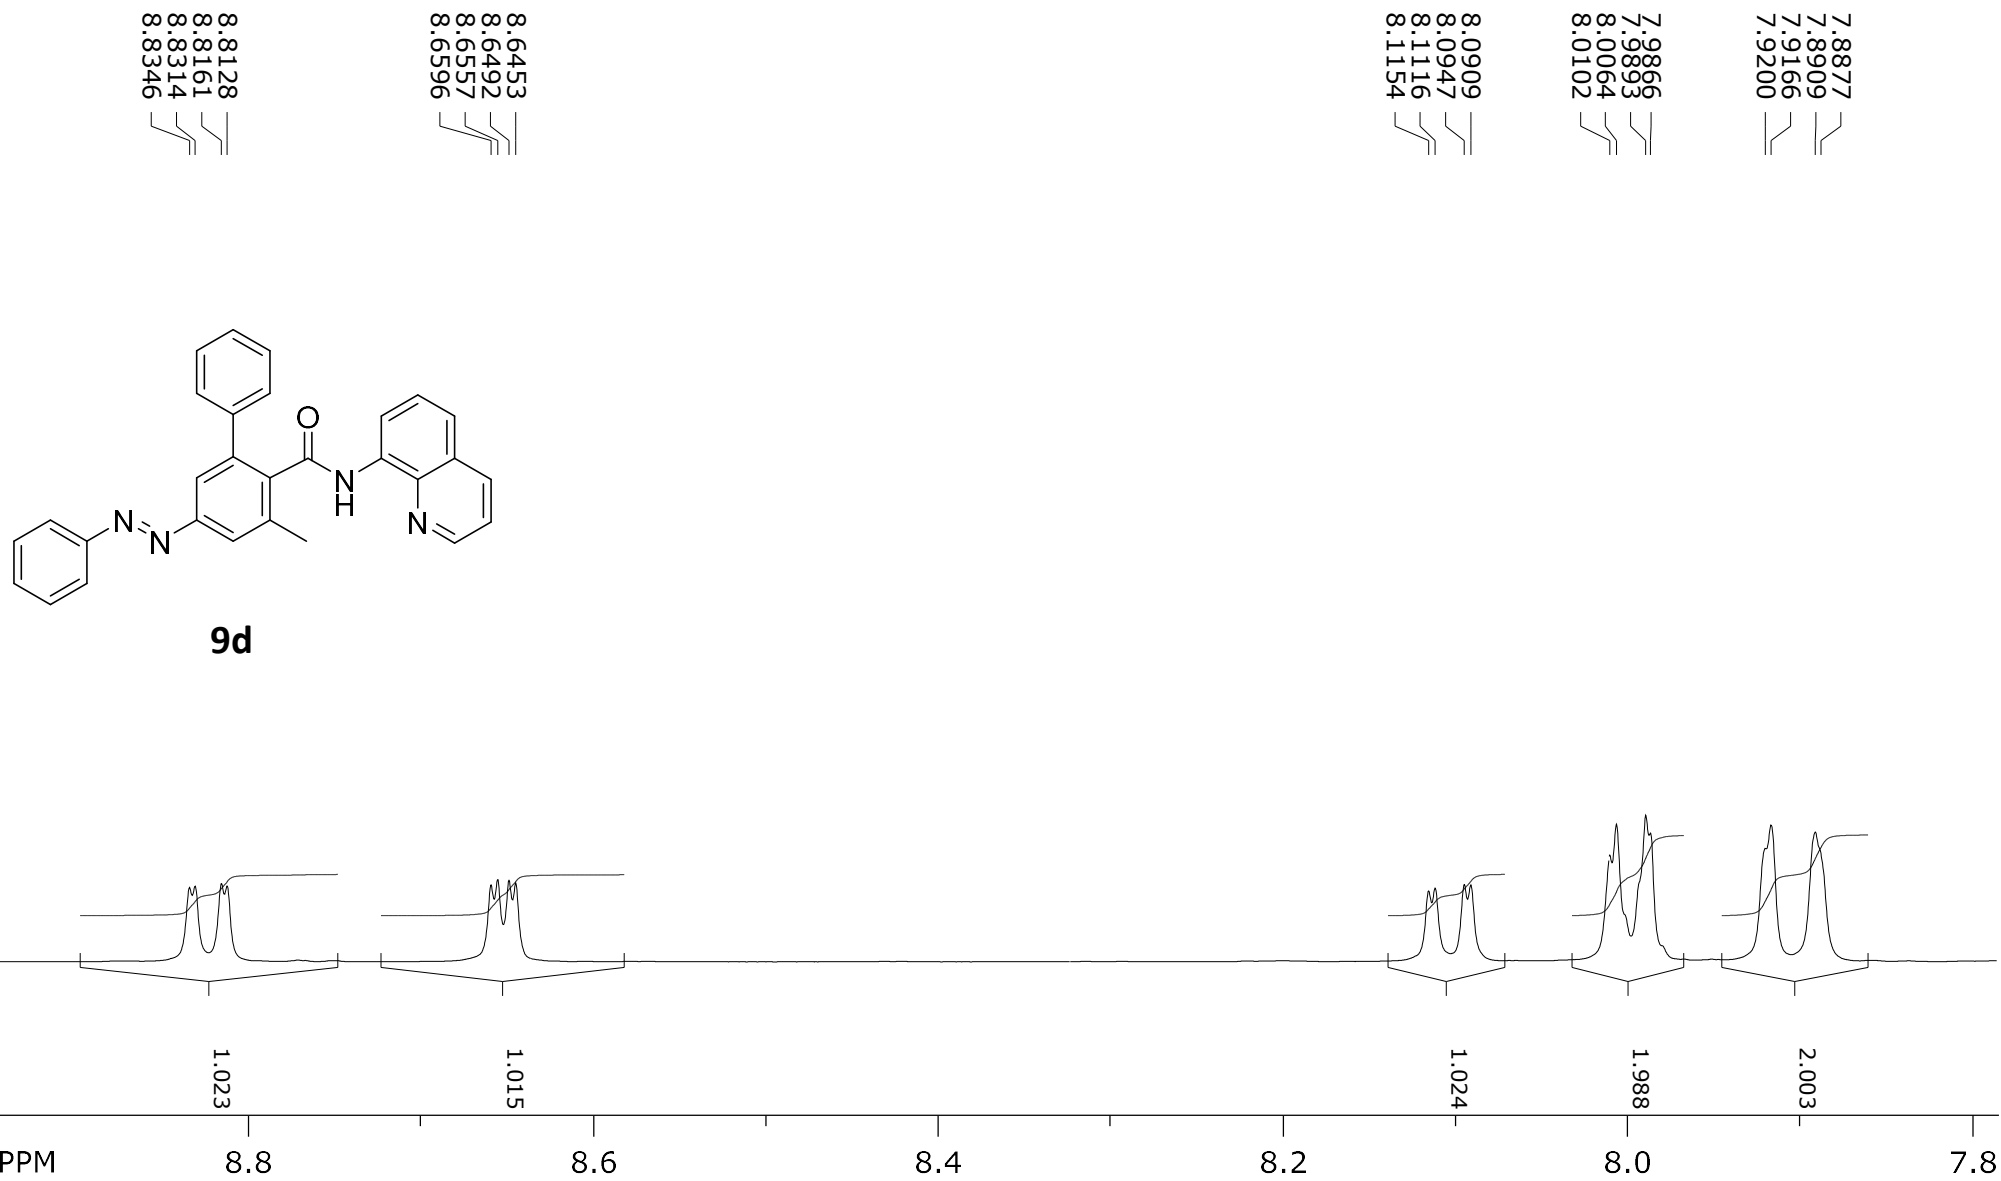

SpinWorks 4: rRP-1206-A2

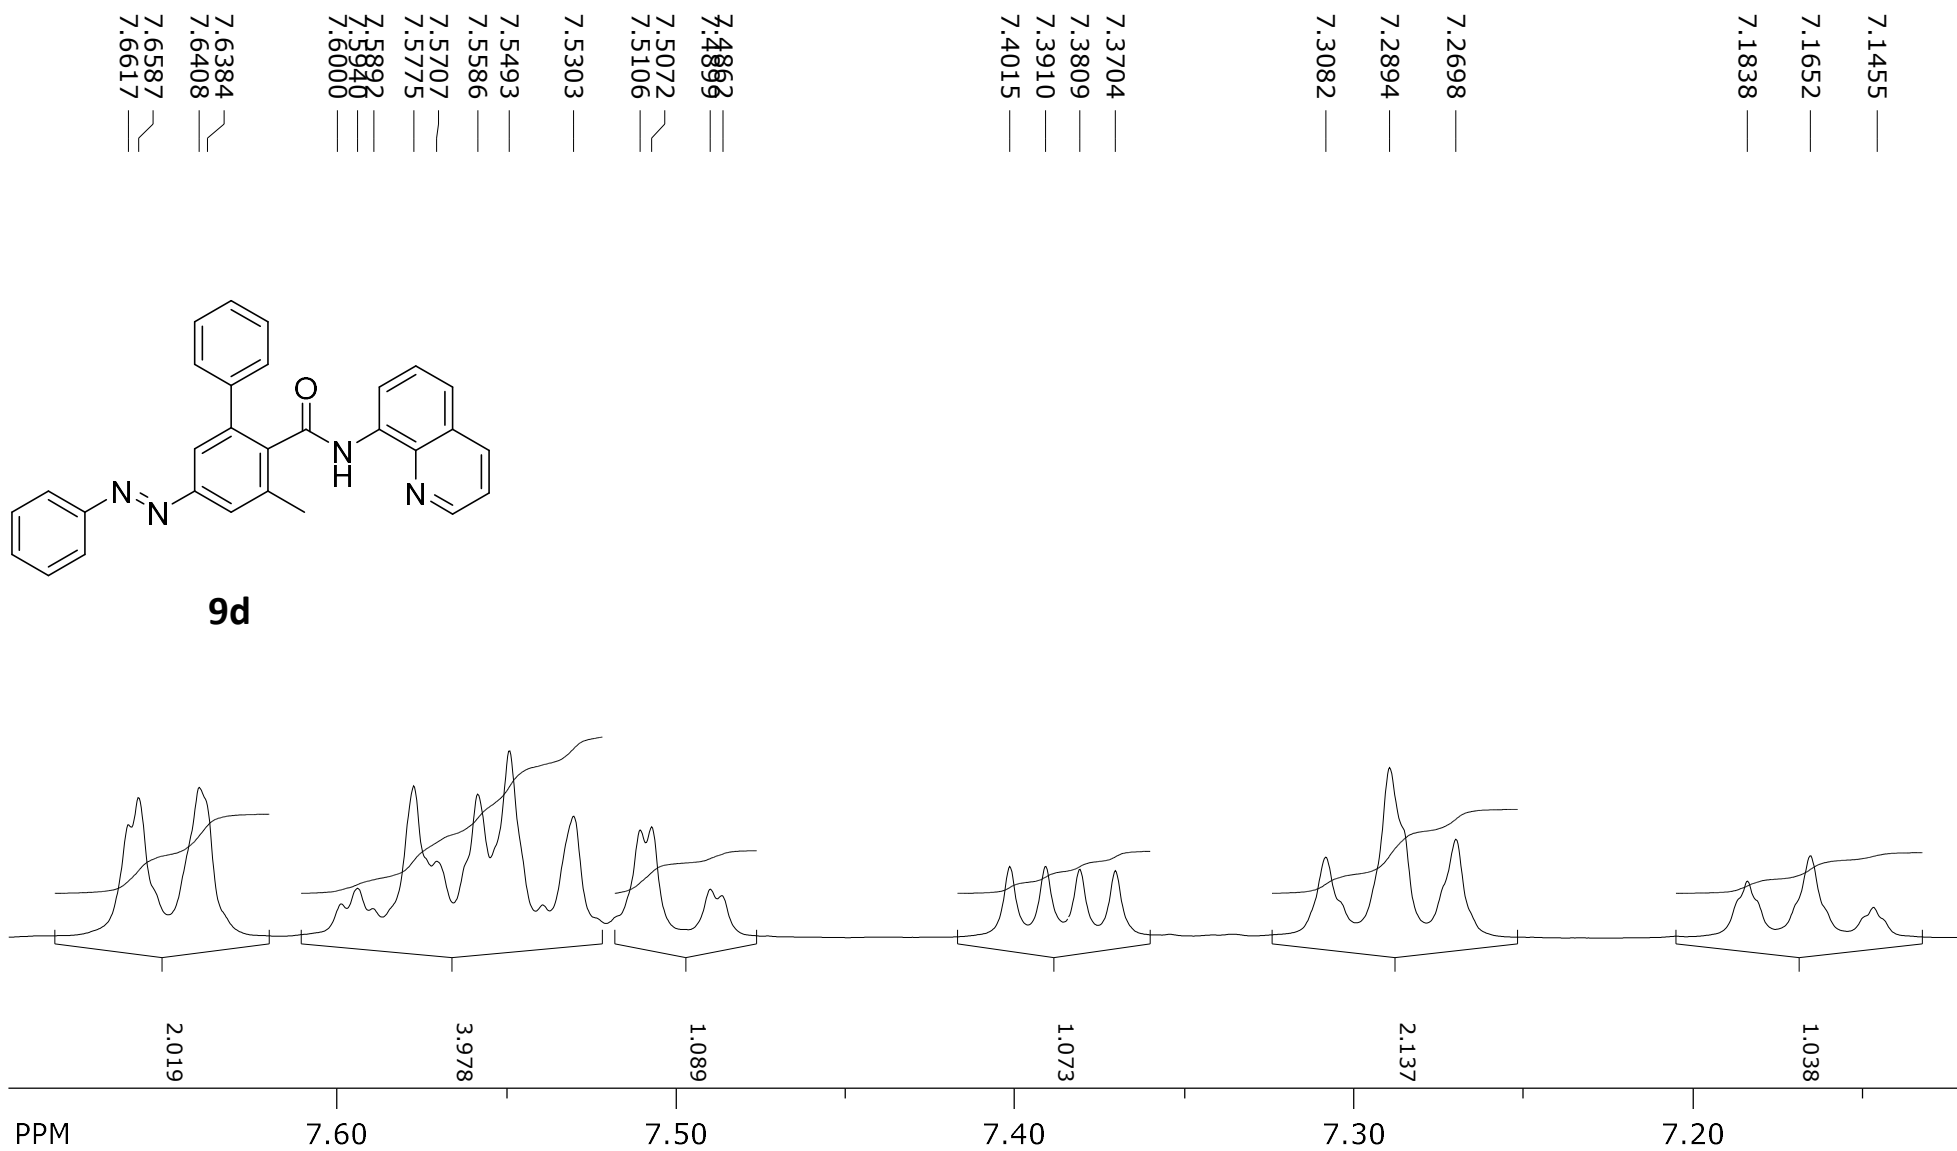

SpinWorks 4: RP 1206 A2  
C13CPD CDCl3 /opt/topspin3.5pl2/nmrdata nmrsu 1

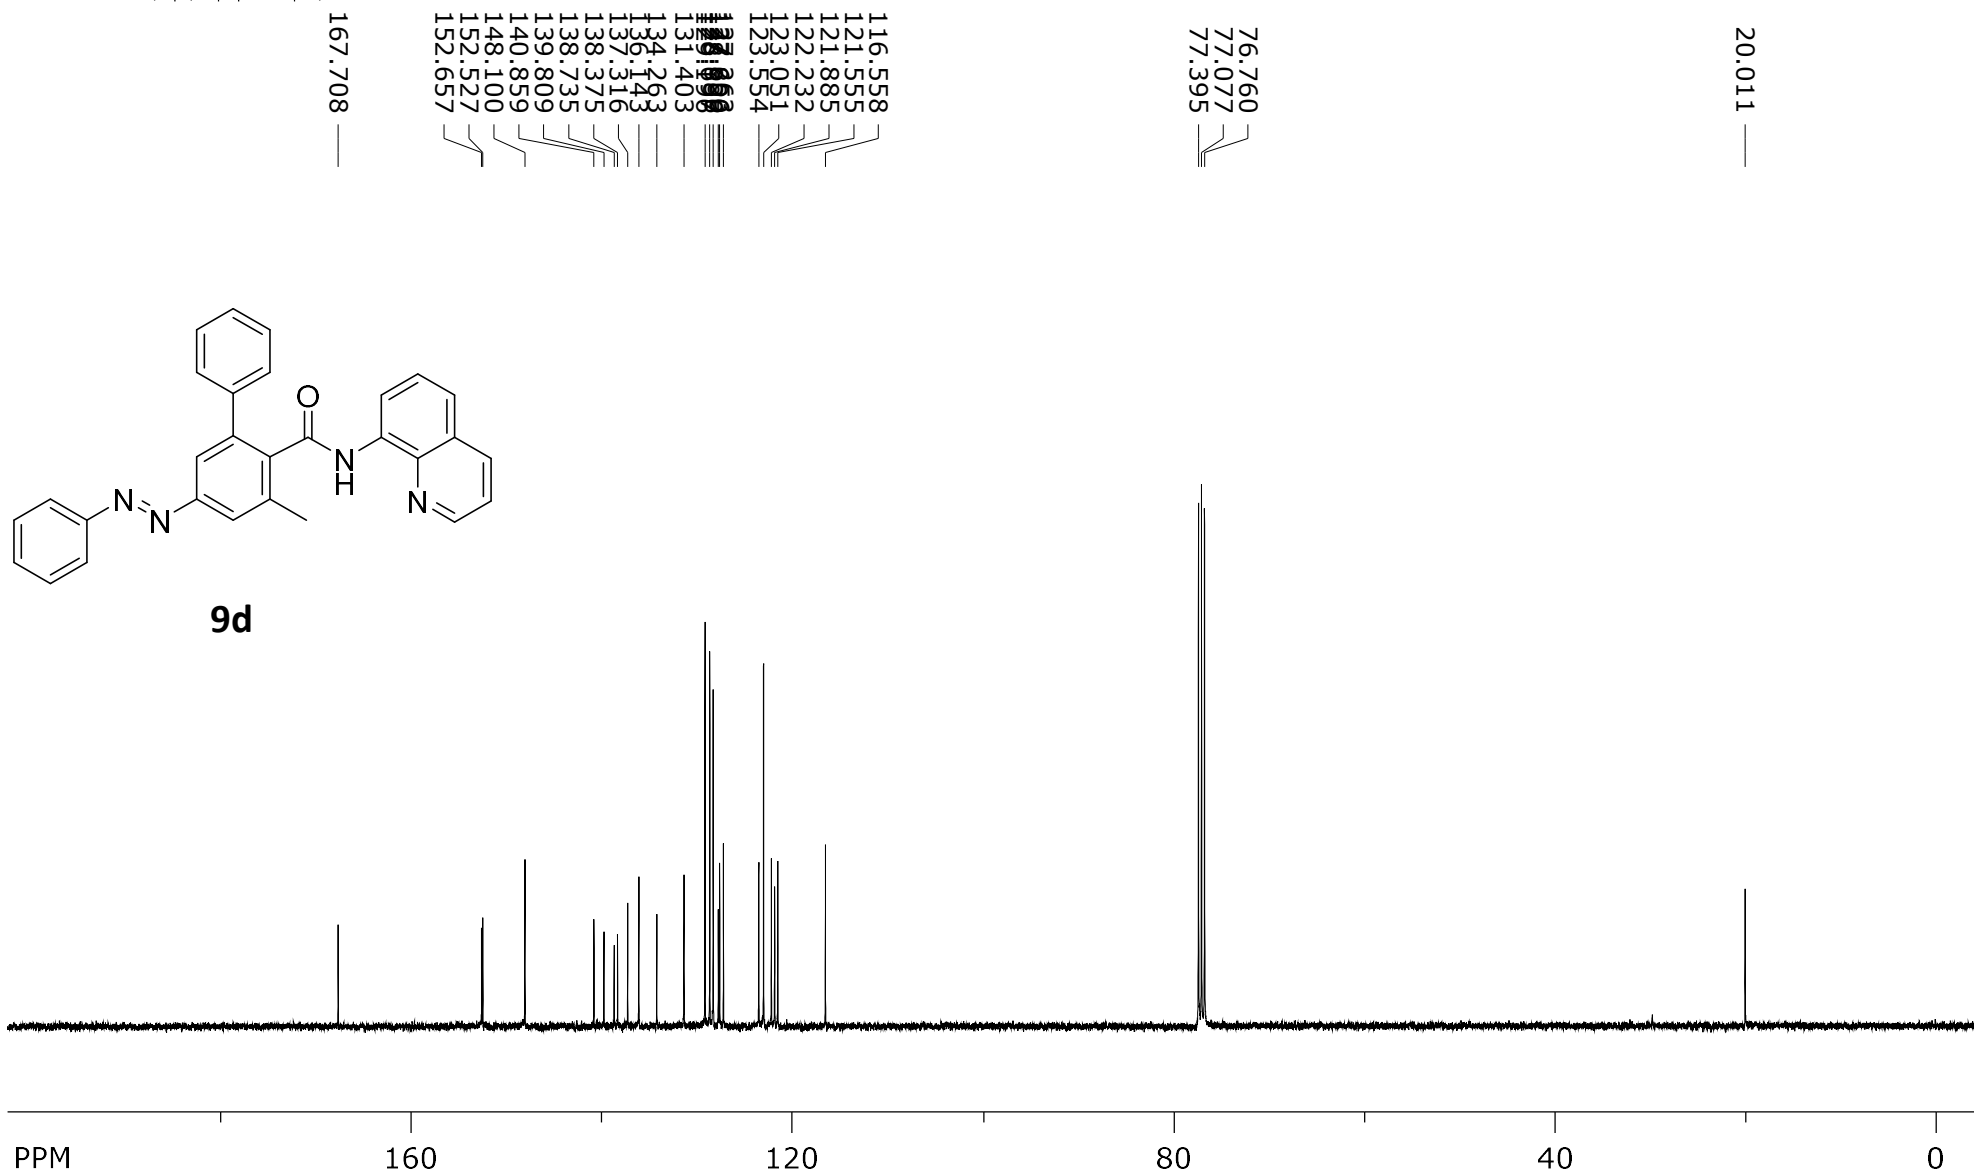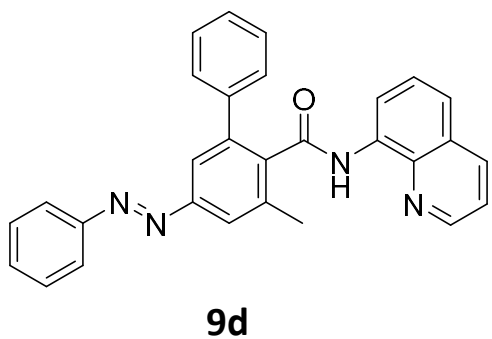

SpinWorks 4: RP 1206 A2  
C13CPD CDCl3 /opt/topspin3.5pl2/nmrdata nmrsu 1

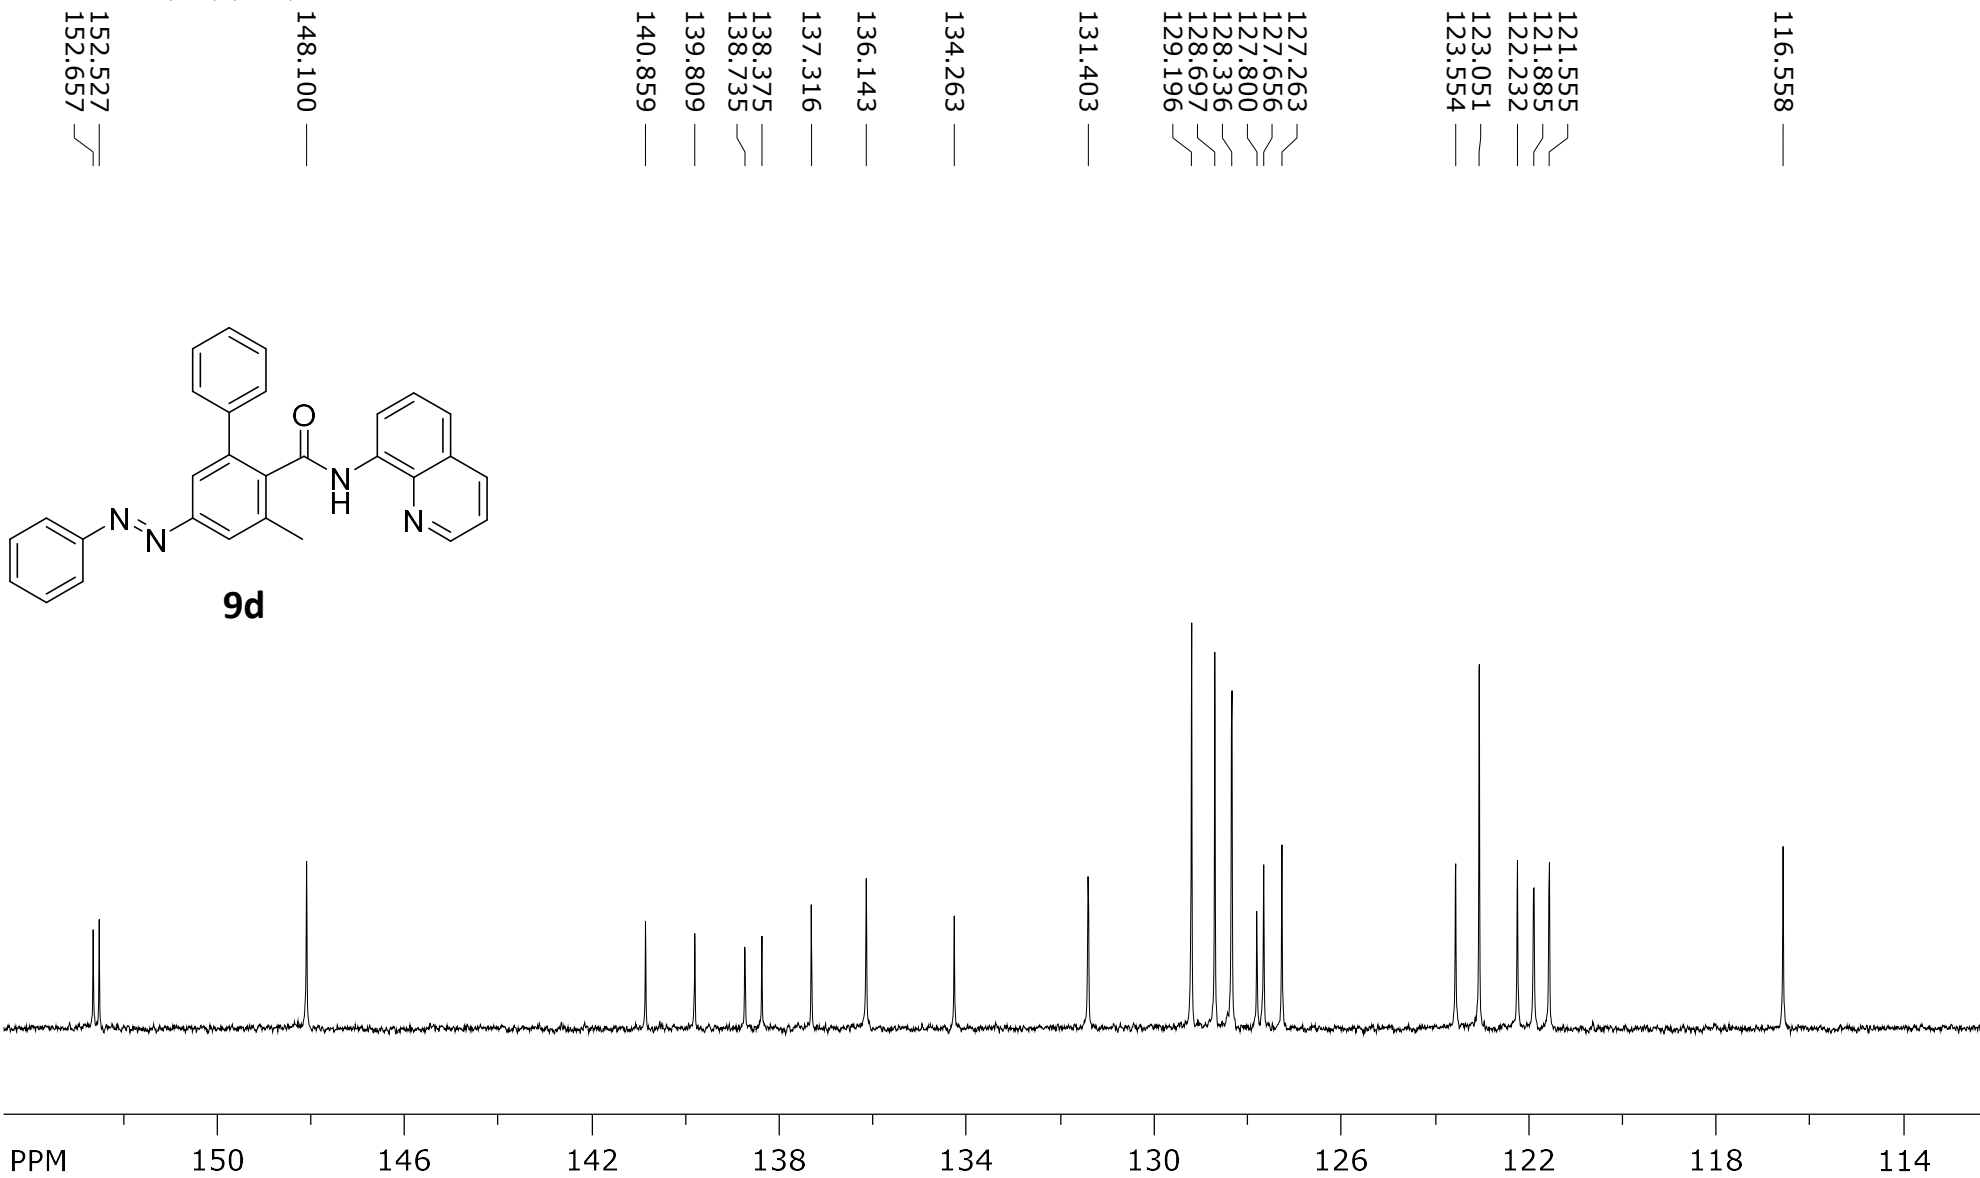



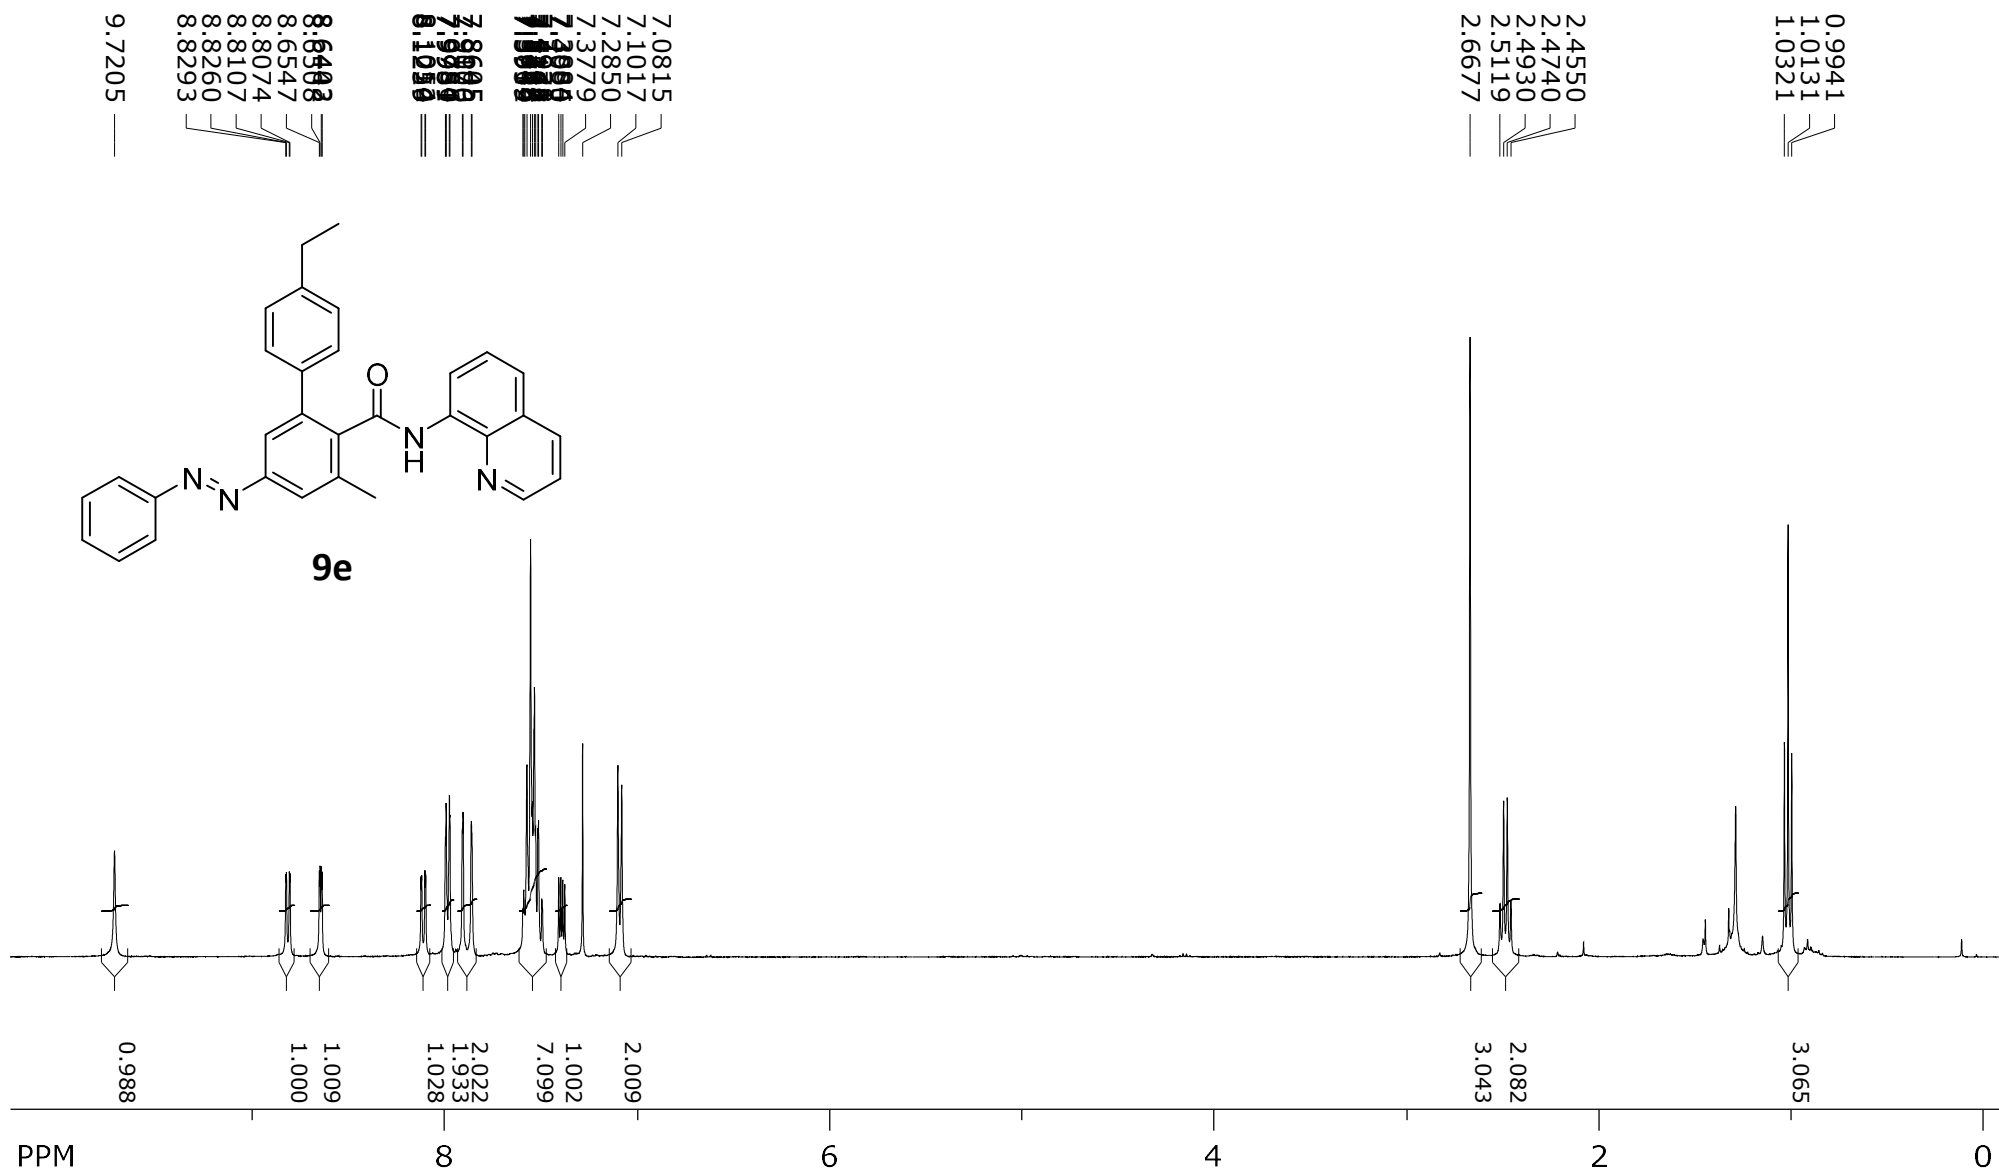

8.8074  
8.8107  
8.8260  
8.8293

8.6403  
8.6442  
8.6508  
8.6547

8.1014  
8.1052  
8.1220  
8.1259

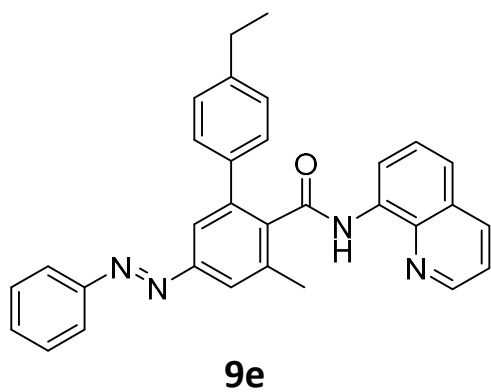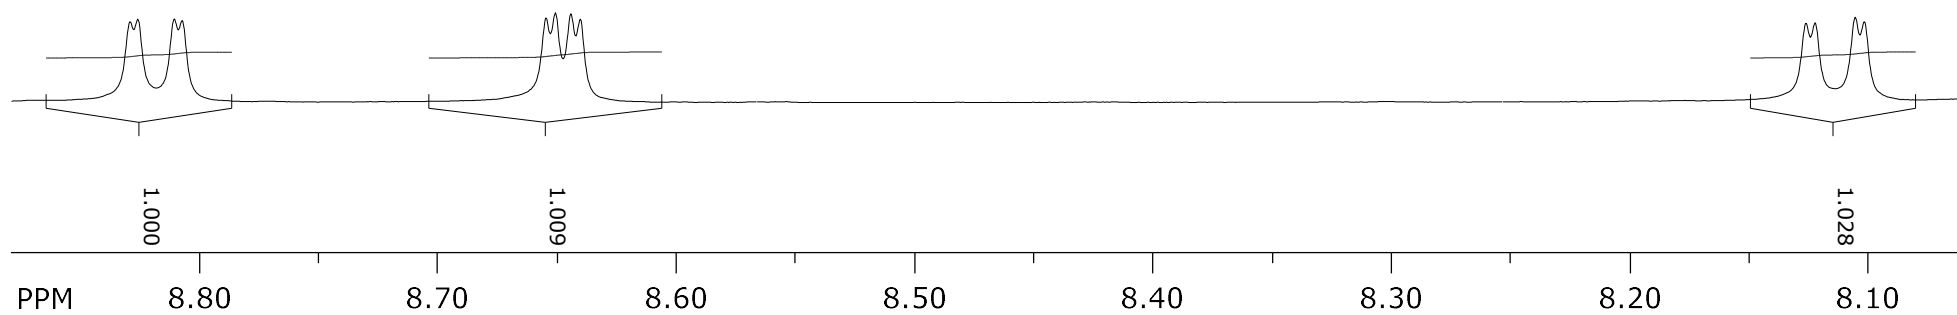

7.9754  
7.9780  
7.9951  
7.9989

7.9070  
7.9106

7.8645

7.5746  
7.5864  
7.5912  
7.5959

7.5558  
7.5462  
7.5354  
7.5297  
7.5178  
7.5145  
7.4971  
7.4938

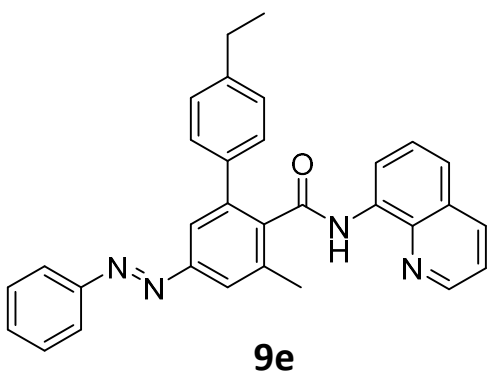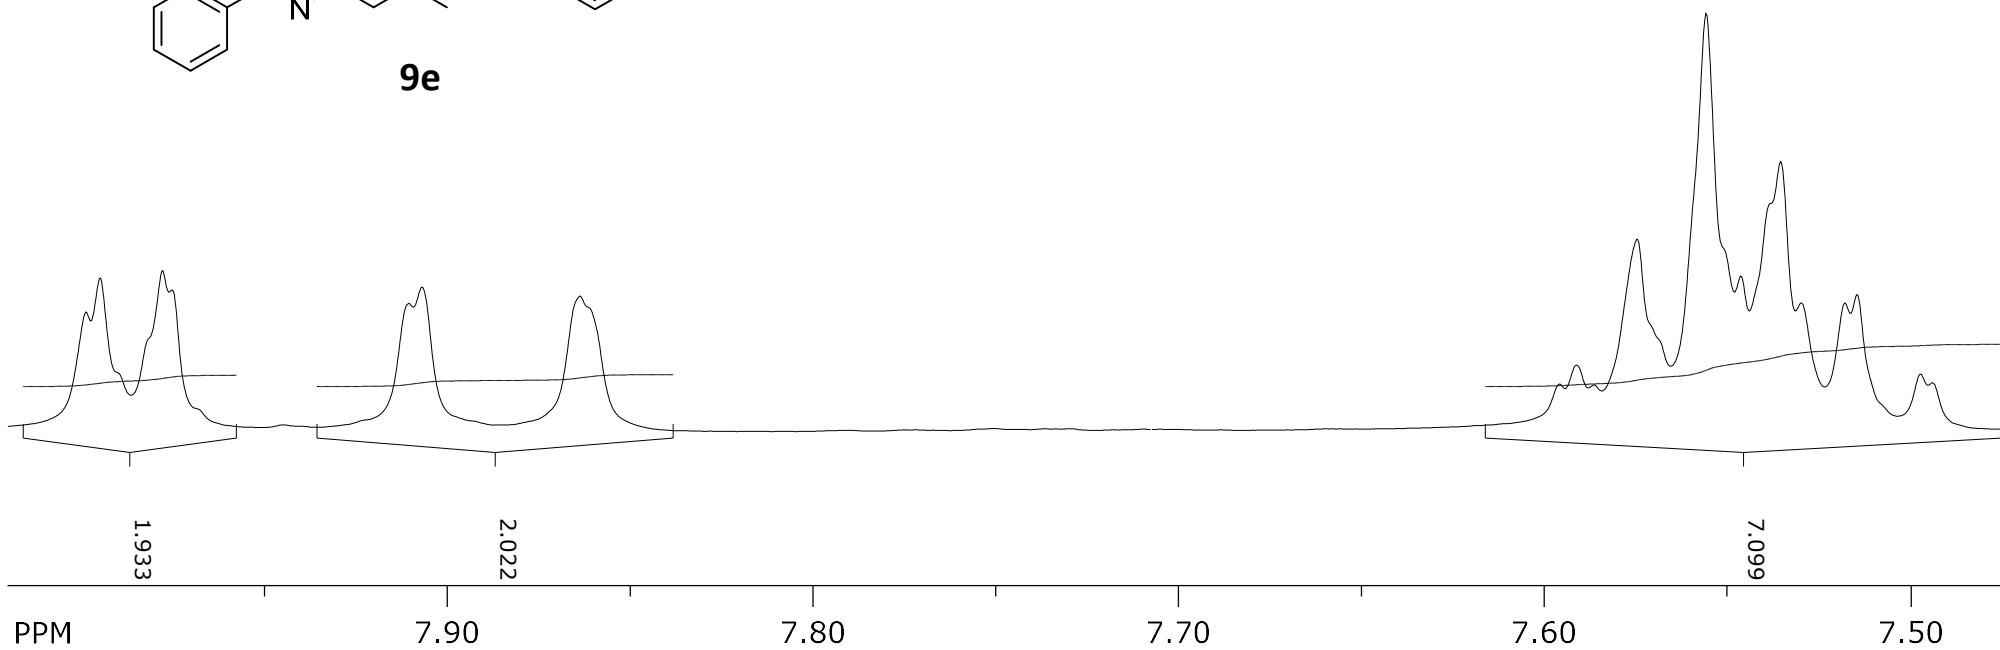

7.3779  
7.3884  
7.3985  
7.4090

7.2850

7.1017

7.0815

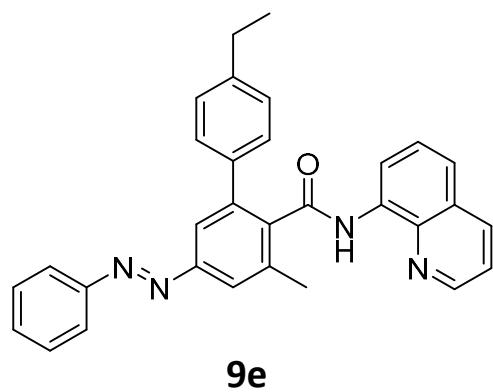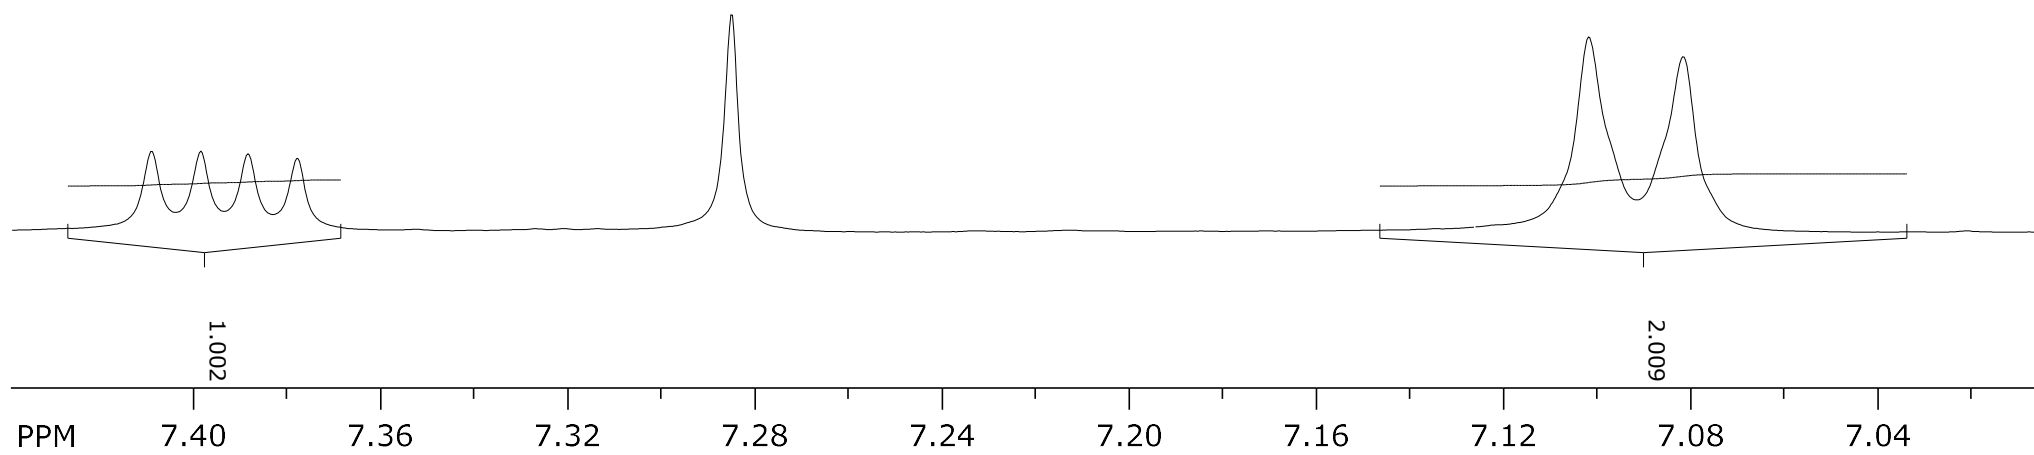

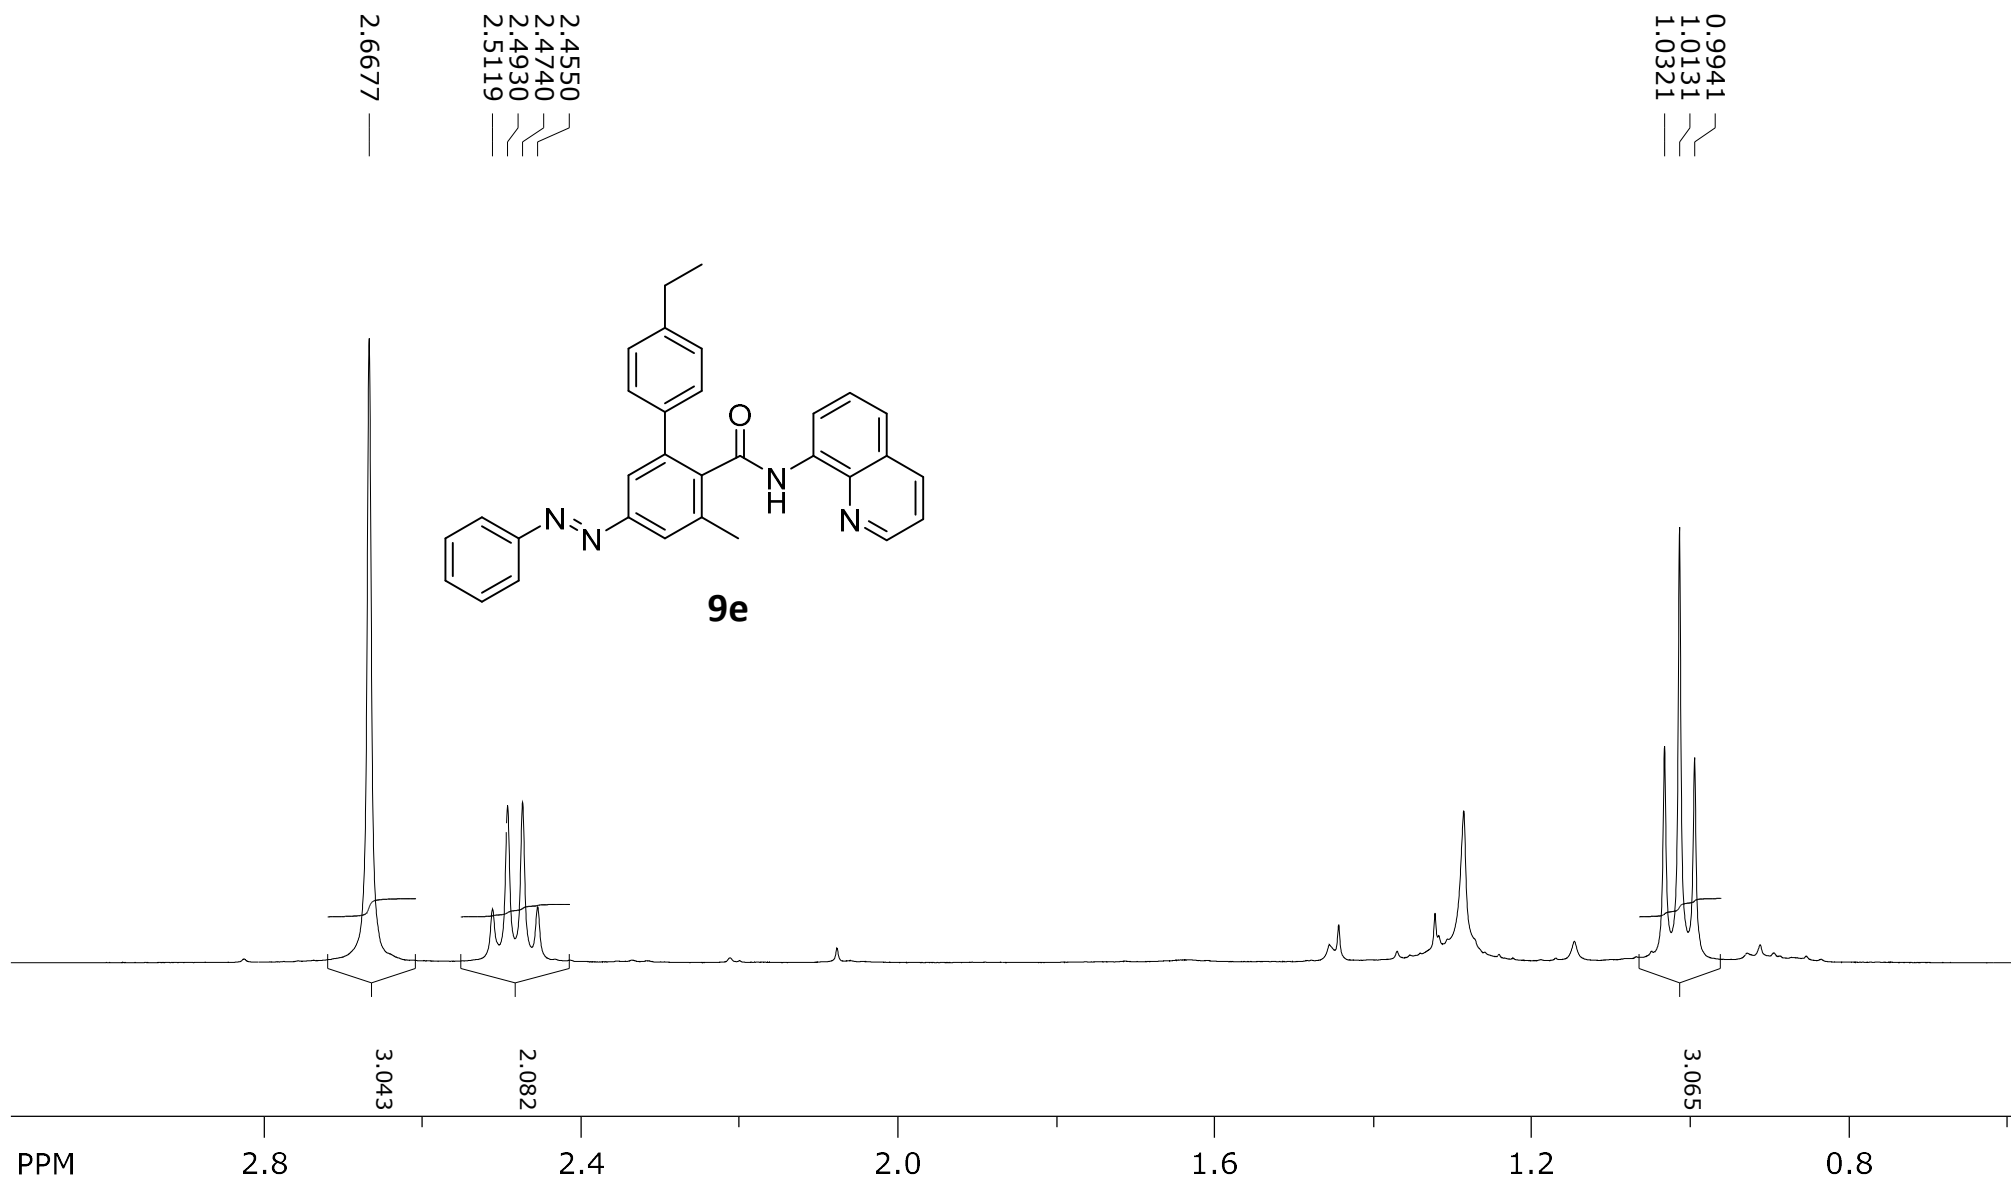

SpinWorks 4: RP 1185 R 6

C13CPD CDCl3 /opt/topspin3.5pl2/nmrdata nmrsu 53

167.909  
152.652  
152.526  
148.056  
143.654  
140.925  
138.673  
137.296  
138.405  
134.343  
136.091  
131.362  
129.189  
127.079  
123.275  
122.039  
122.286  
121.810  
121.515  
116.587

76.750  
77.068  
77.386

28.400  
20.045  
15.289

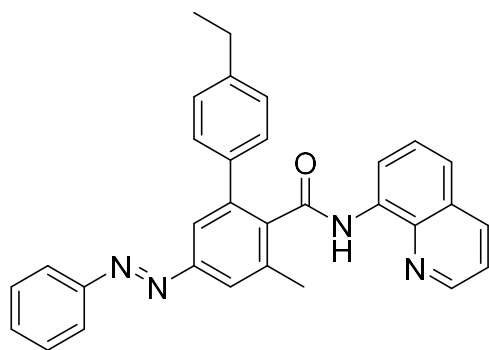

9e

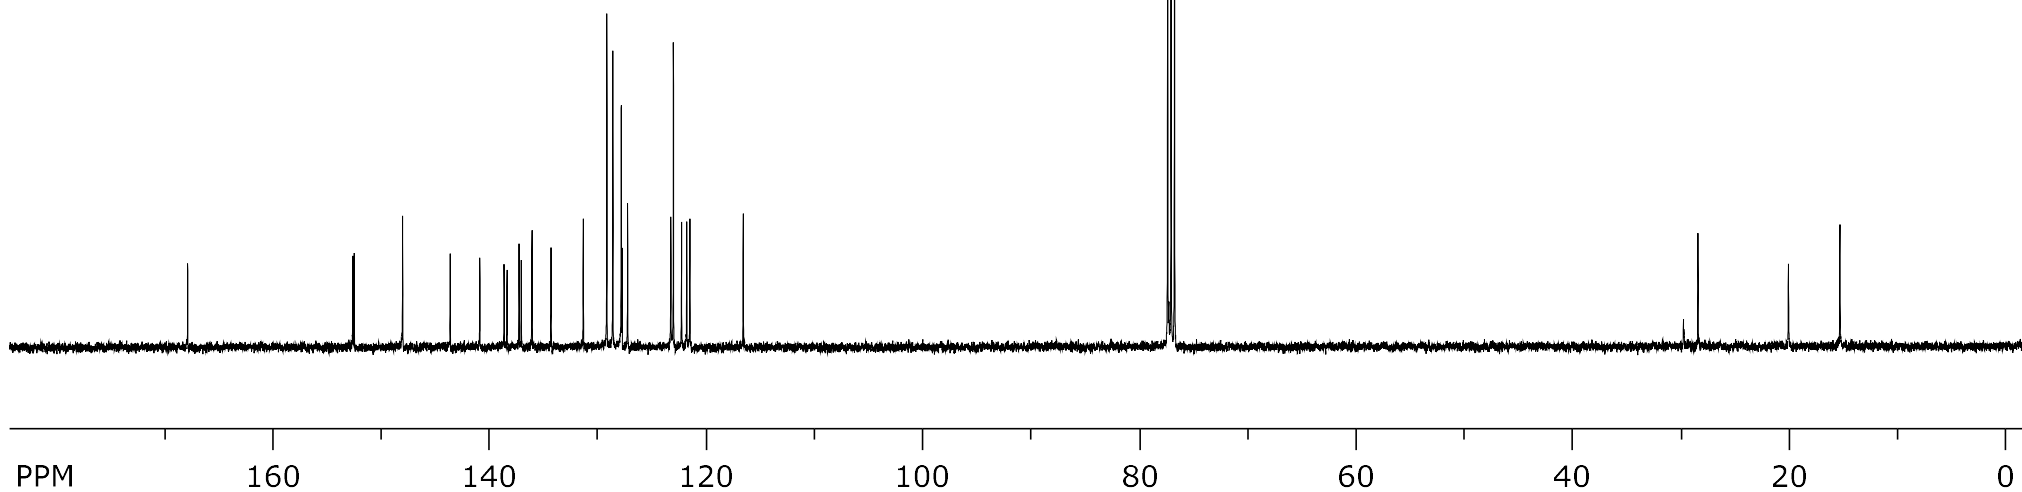

SpinWorks 4: RP 1185 R 6  
C13CPD CDCl3 /opt/topspin3.5pl2/nmrdata nmrsu 53

152.526 —  
152.652 —  
148.056 —  
143.654 —  
140.925 —  
138.673 —  
138.405 —  
137.296 —  
137.091 —  
136.100 —  
134.343 —  
131.362 —  
129.187 —  
128.633 —  
127.856 —  
127.774 —  
127.270 —  
123.275 —  
123.039 —  
122.286 —  
121.810 —  
121.515 —  
116.587 —

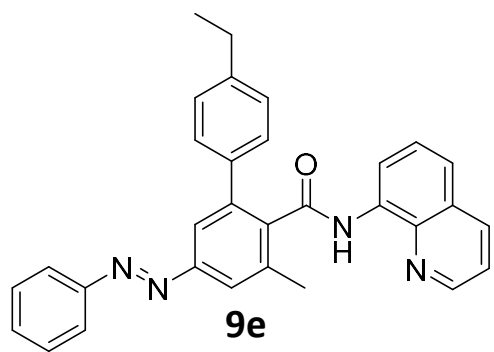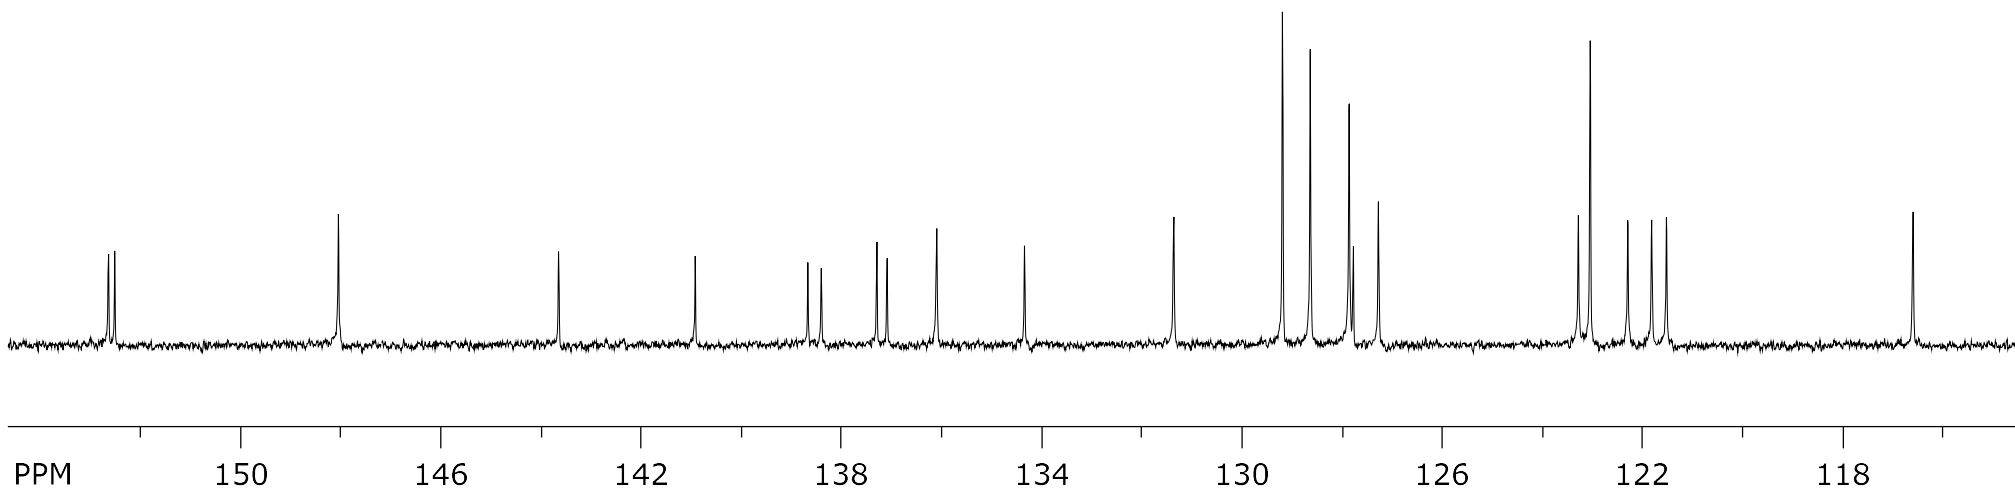

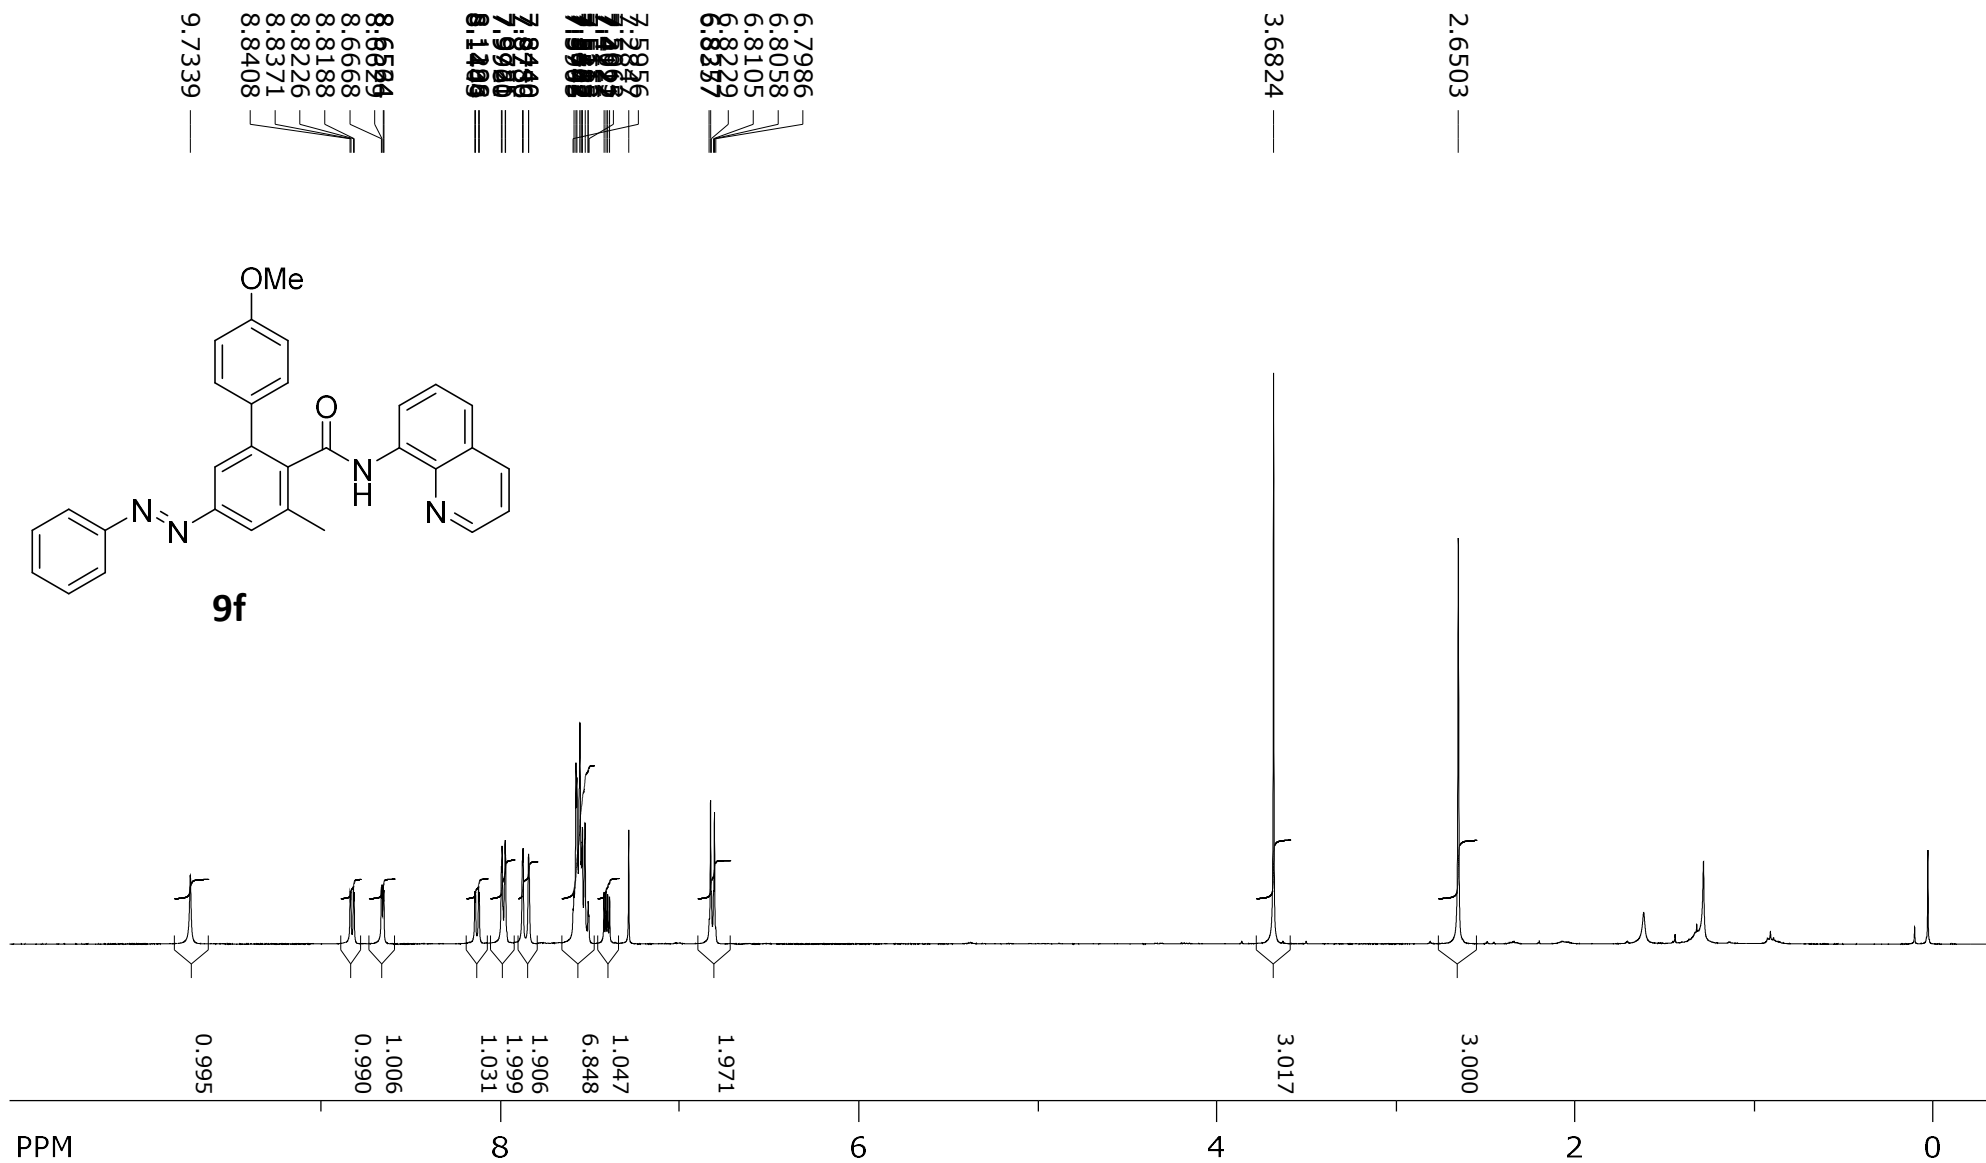



SpinWorks 4: RP-1187fin

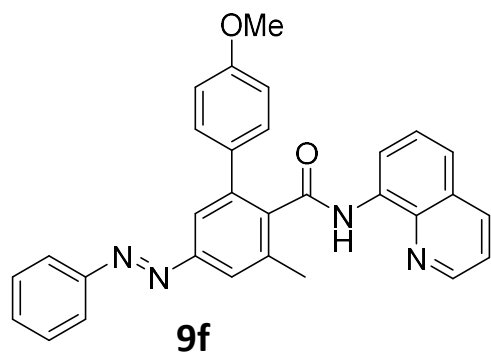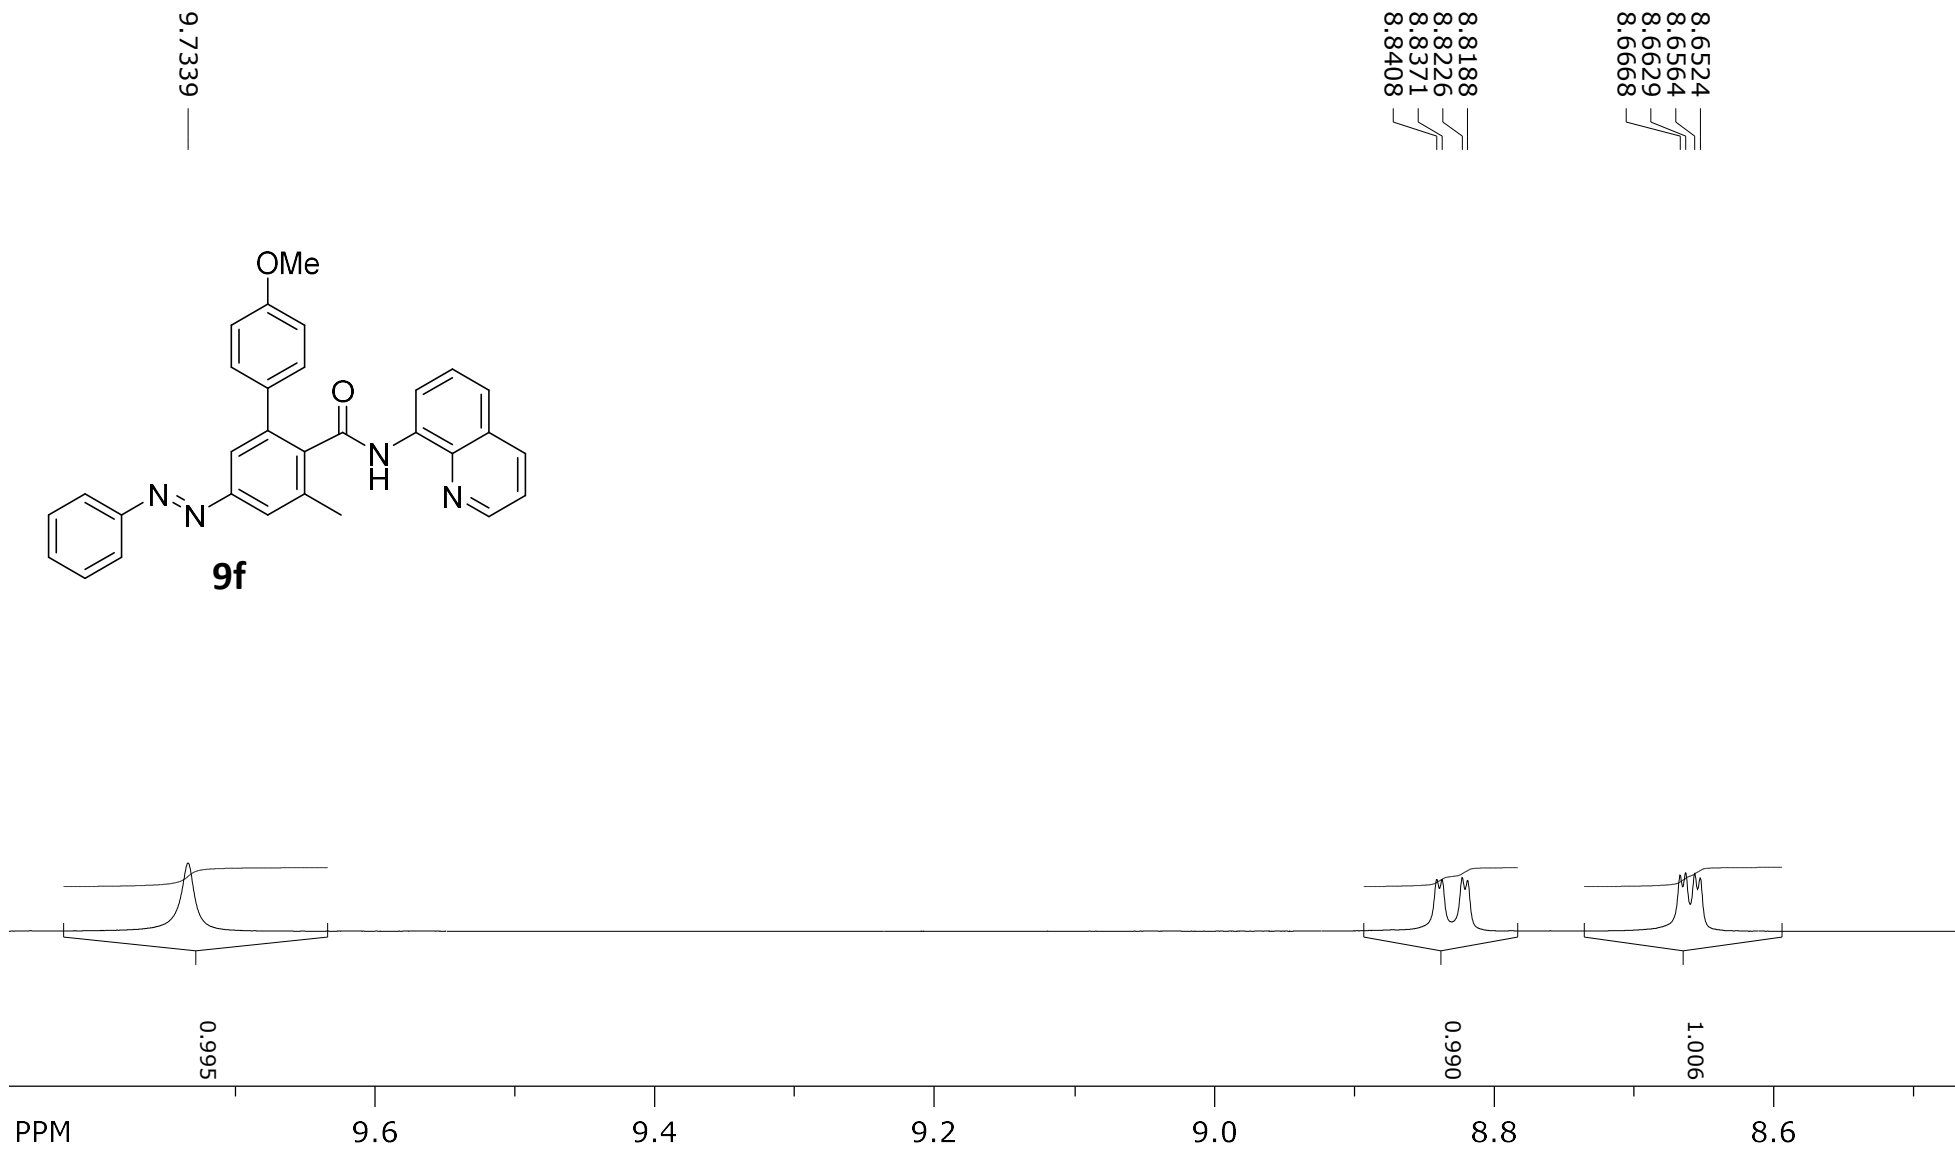

SpinWorks 4: RP-1187fin

8.1198  
8.1236  
8.1404  
8.1443

7.9921  
7.9960  
7.9725  
7.9751

7.8750  
7.8786

7.8440

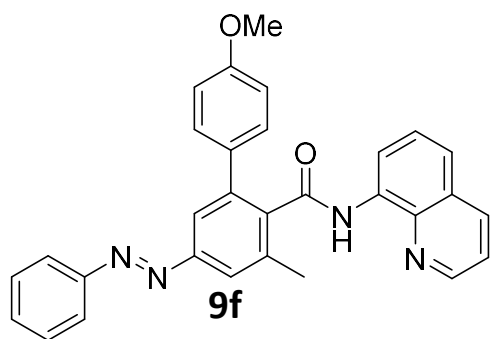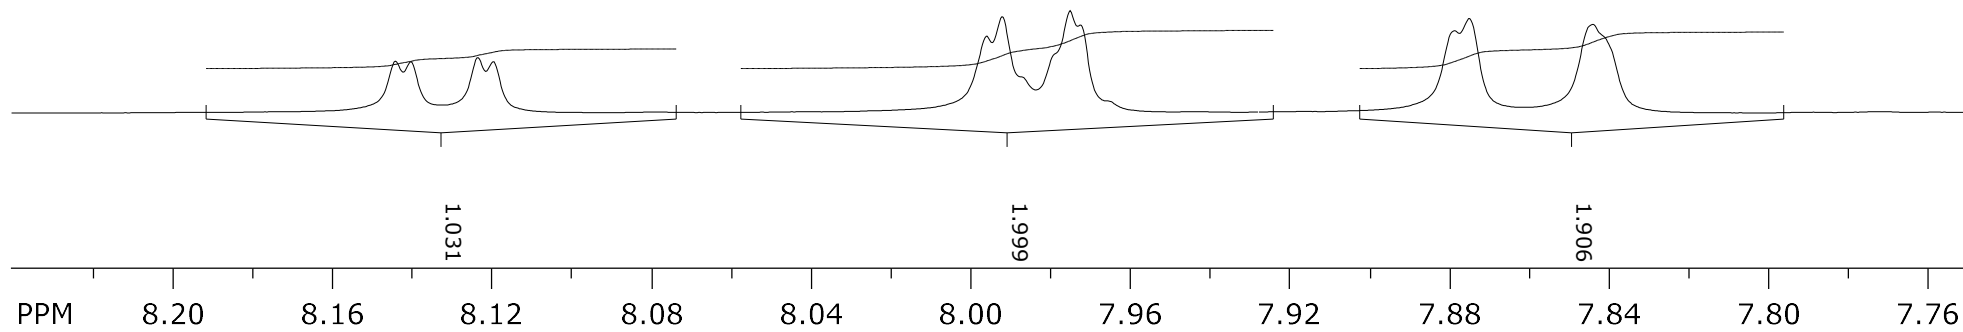

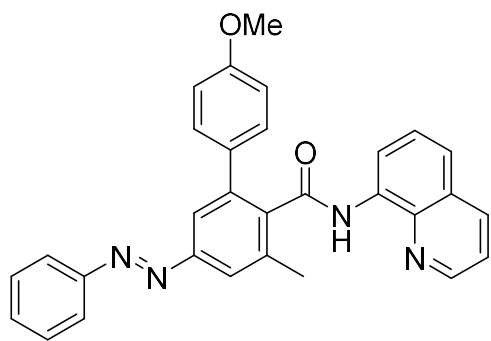

9f

7.5063  
7.5113  
7.5113  
7.5285  
7.5432  
7.5572  
7.5742  
7.5793  
7.5905

7.3915  
7.4021  
7.4122  
7.4227

7.2847

6.7986  
6.8058  
6.8105  
6.8229  
6.8277  
6.8357

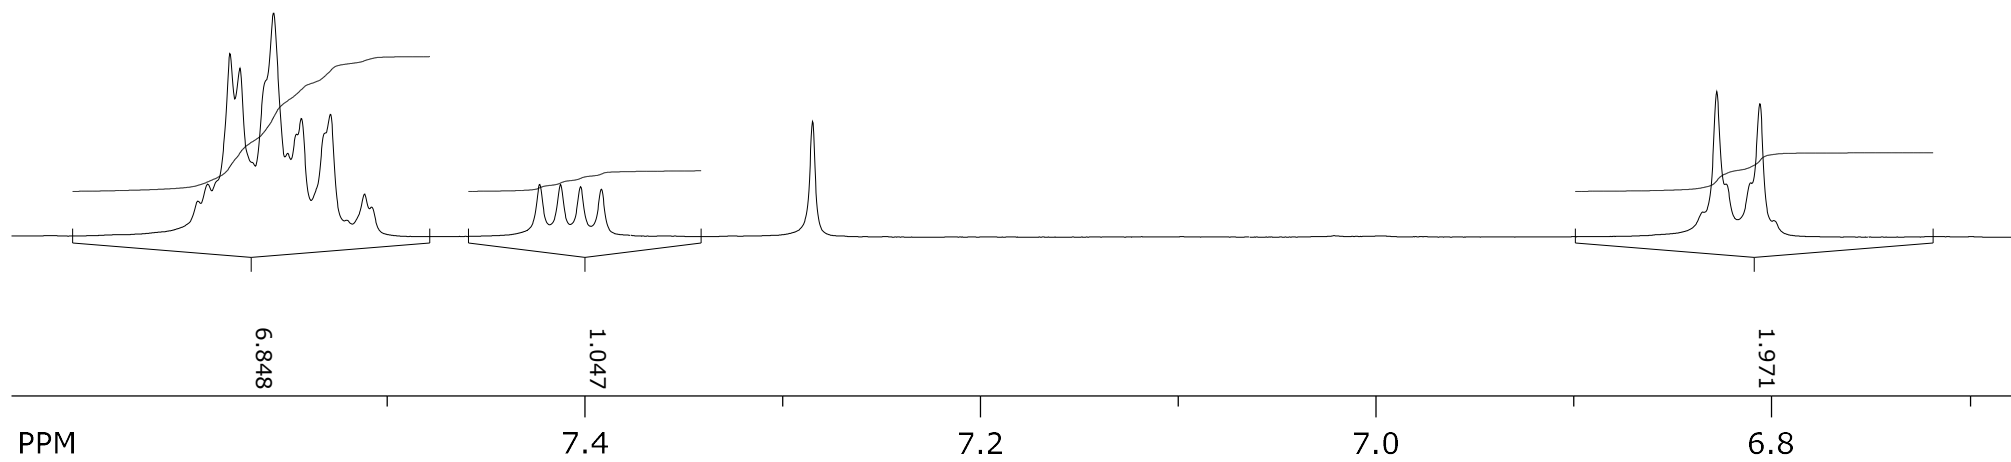

SpinWorks 4: RP 1187 R  
C13CPD CDCl3 /opt/topspin3.5pl2/nmrdata nmrsu 20

168.009 —  
159.160 —  
152.514 —  
148.128 —  
140.439 —  
138.662 —  
137.222 —  
136.187 —  
134.296 —  
132.333 —  
131.378 —  
129.997 —  
129.107 —  
127.845 —  
123.033 —  
122.302 —  
121.925 —  
121.573 —  
116.634 —  
113.840 —

76.765 —  
77.083 —  
77.401 —

55.136 —

20.015 —

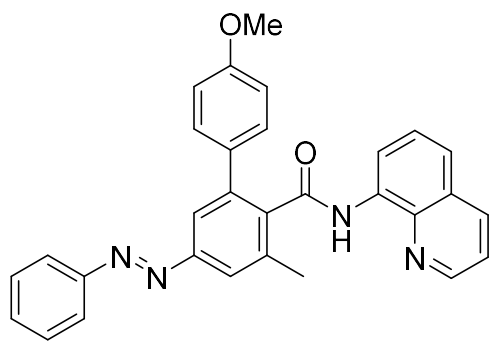

**9f**

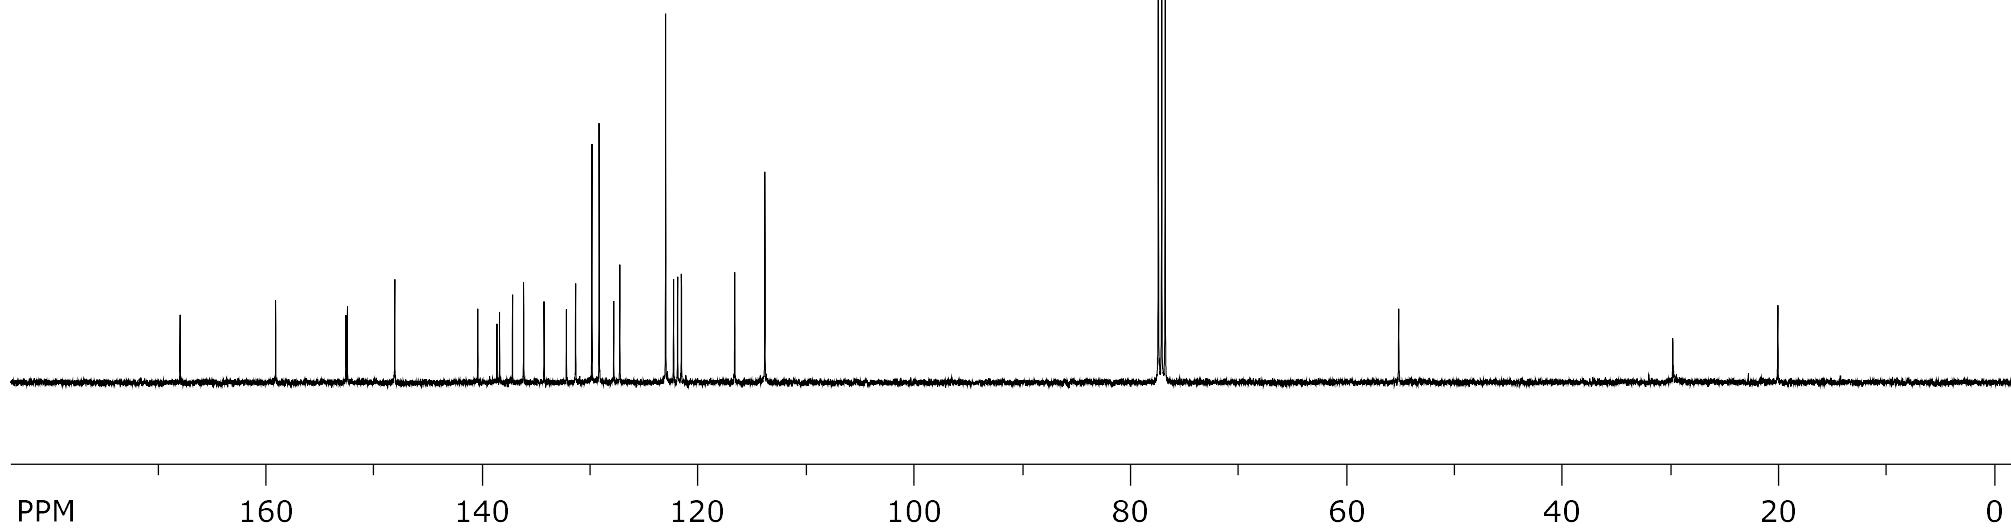

SpinWorks 4: RP 1187 R  
C13CPD CDCl3 /opt/topspin3.5pl2/nmrdata nmrsu 20

140.439 —  
138.417 —  
138.662 —  
137.222 —  
136.187 —  
134.296 —  
132.233 —  
131.378 —  
129.860 —  
129.197 —  
127.845 —  
127.283 —  
123.033 —  
121.573 —  
121.925 —  
122.302 —  
116.634 —  
113.840 —

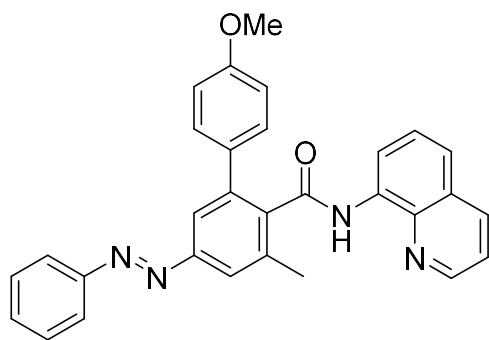

**9f**

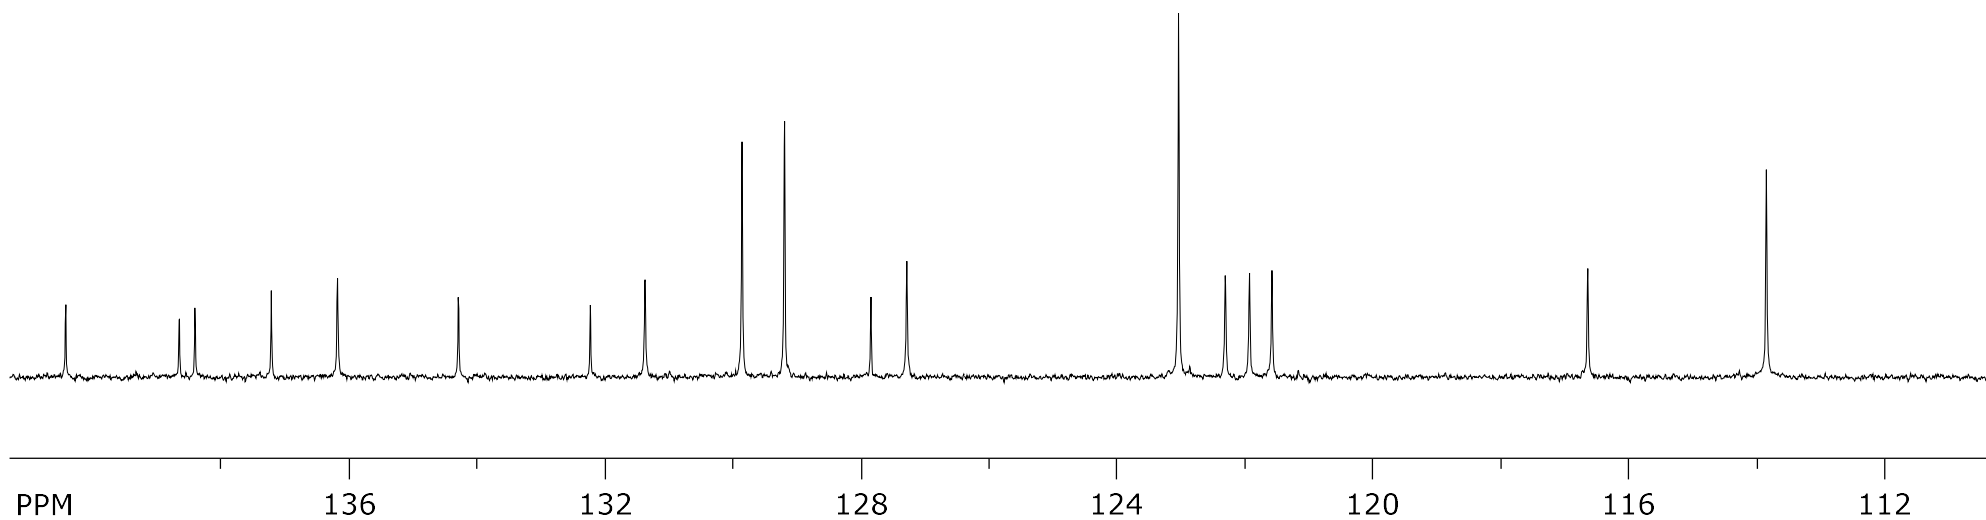

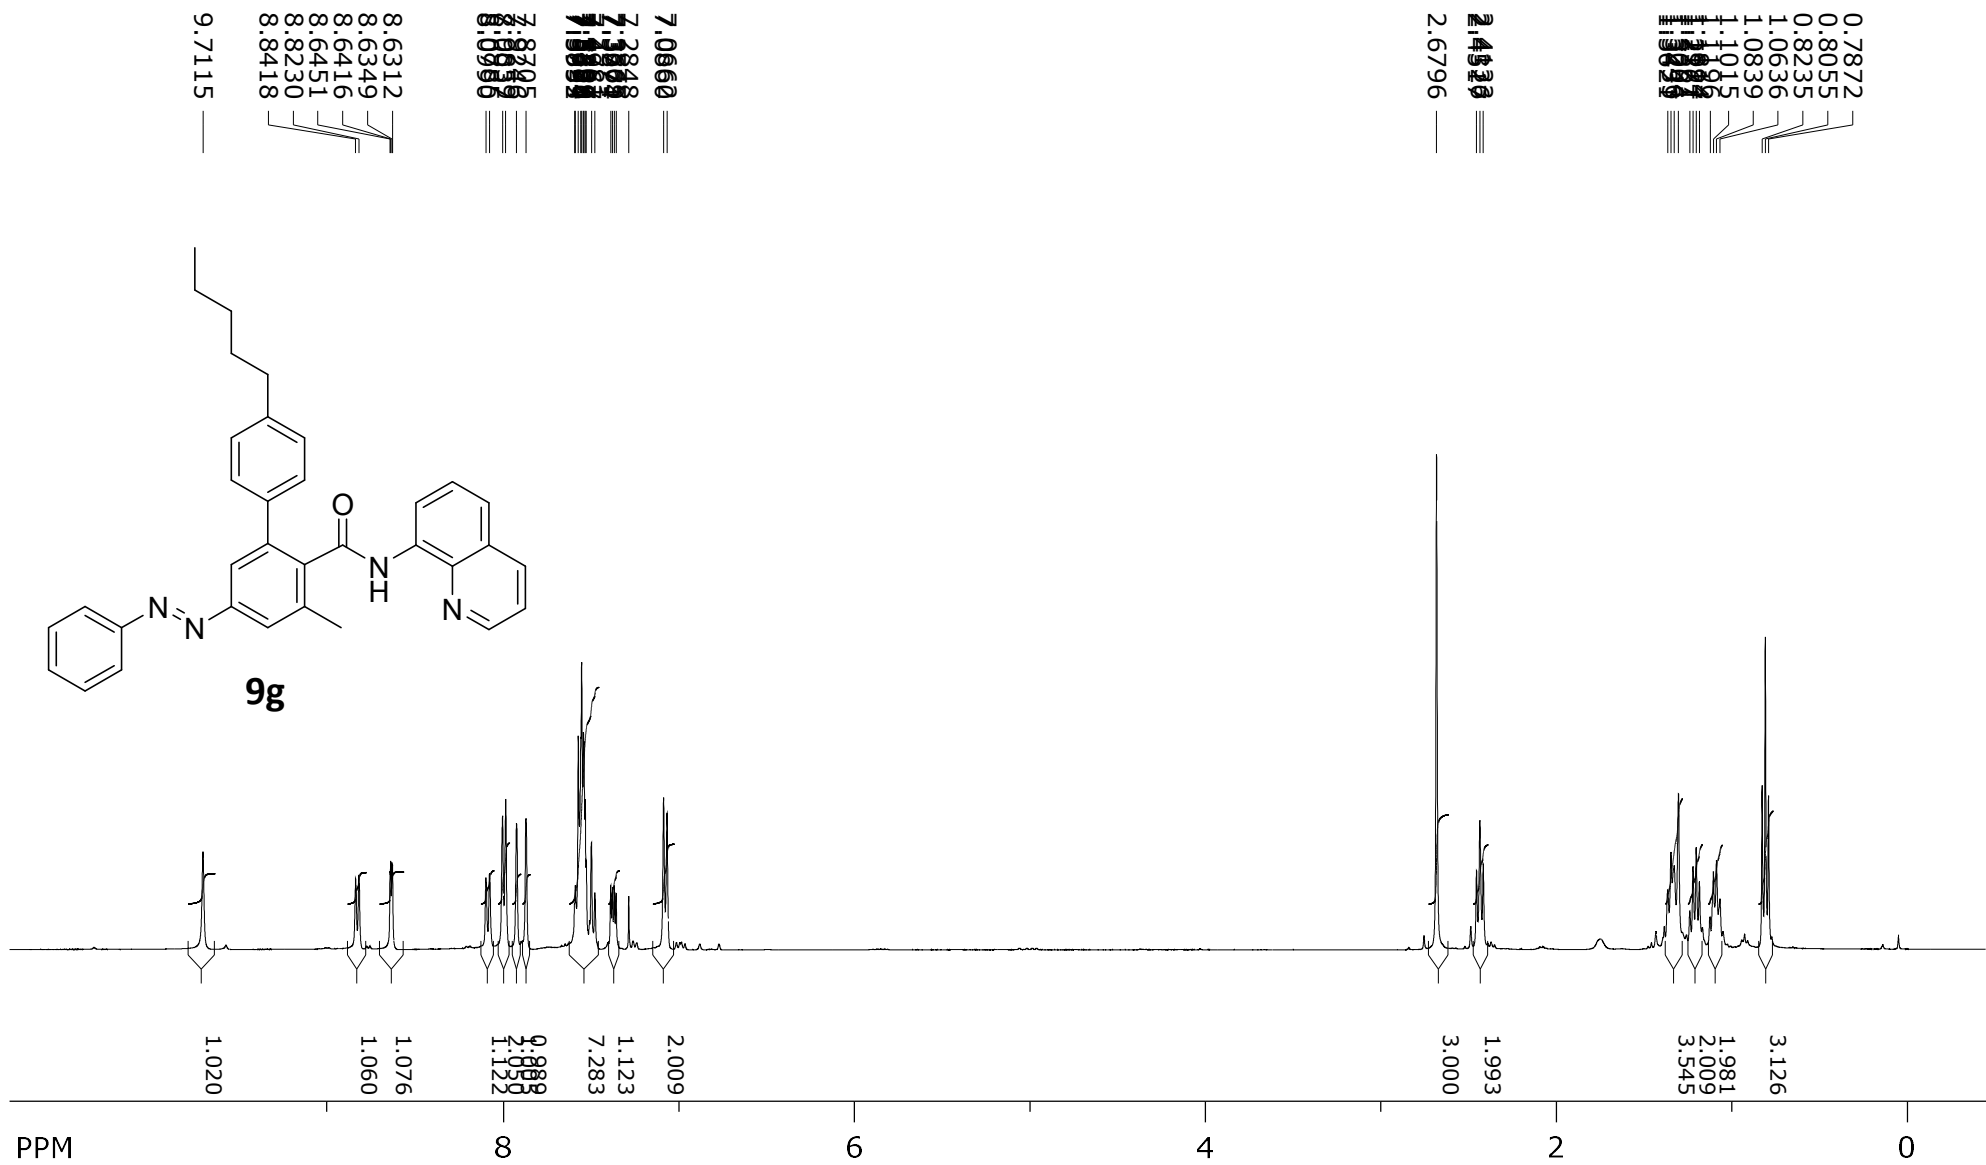

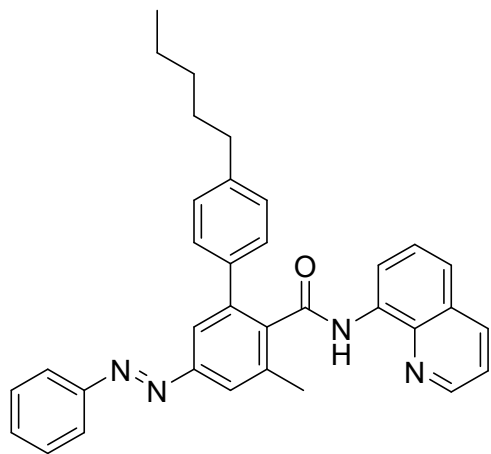

9g

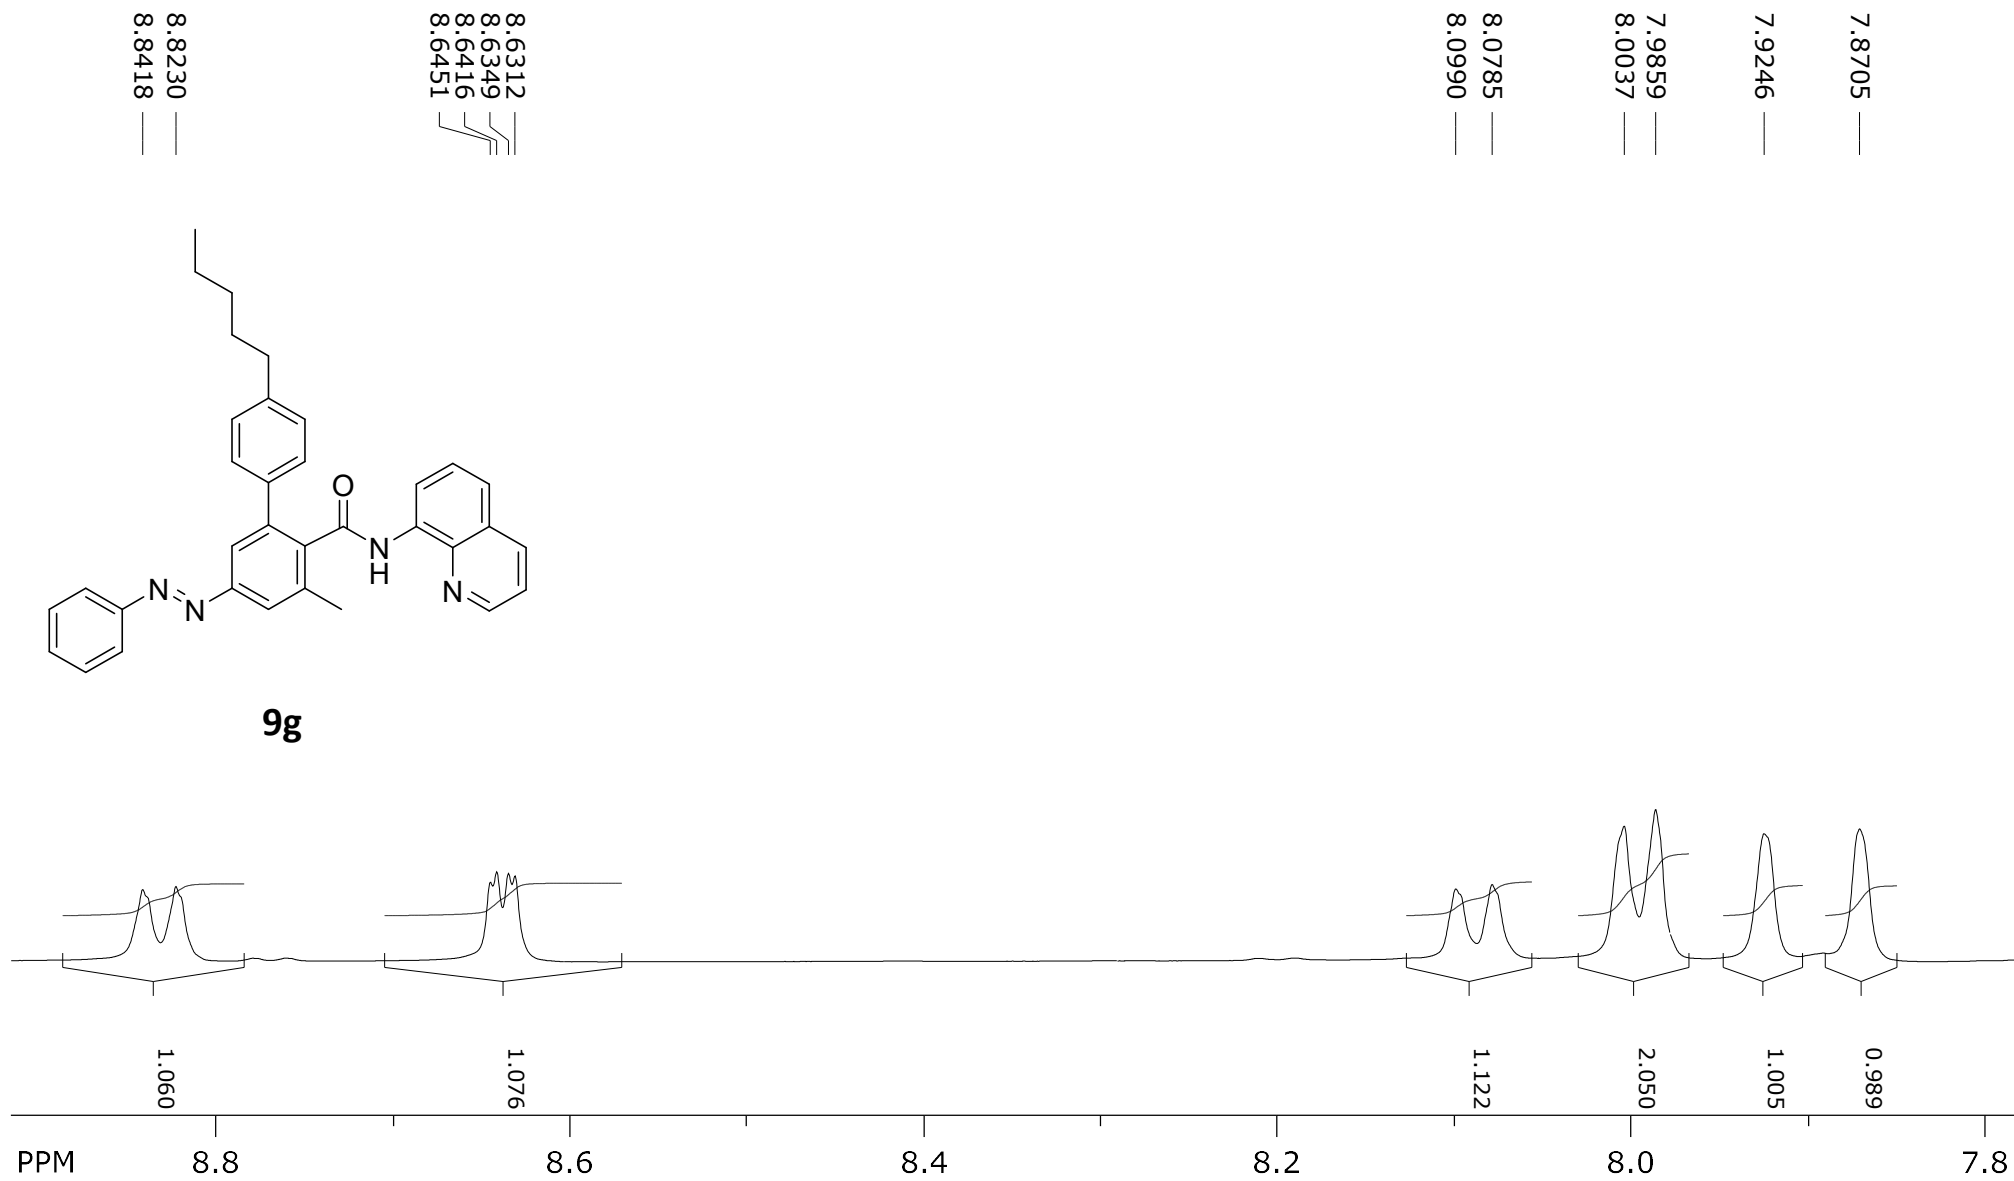

7.5267  
7.53329  
7.5395  
7.5429  
7.5531  
7.5576  
7.5724  
7.5893  
7.5932  
7.4781  
7.4967  
7.3565  
7.3669  
7.3771  
7.3874  
7.2848  
7.0662  
7.0860

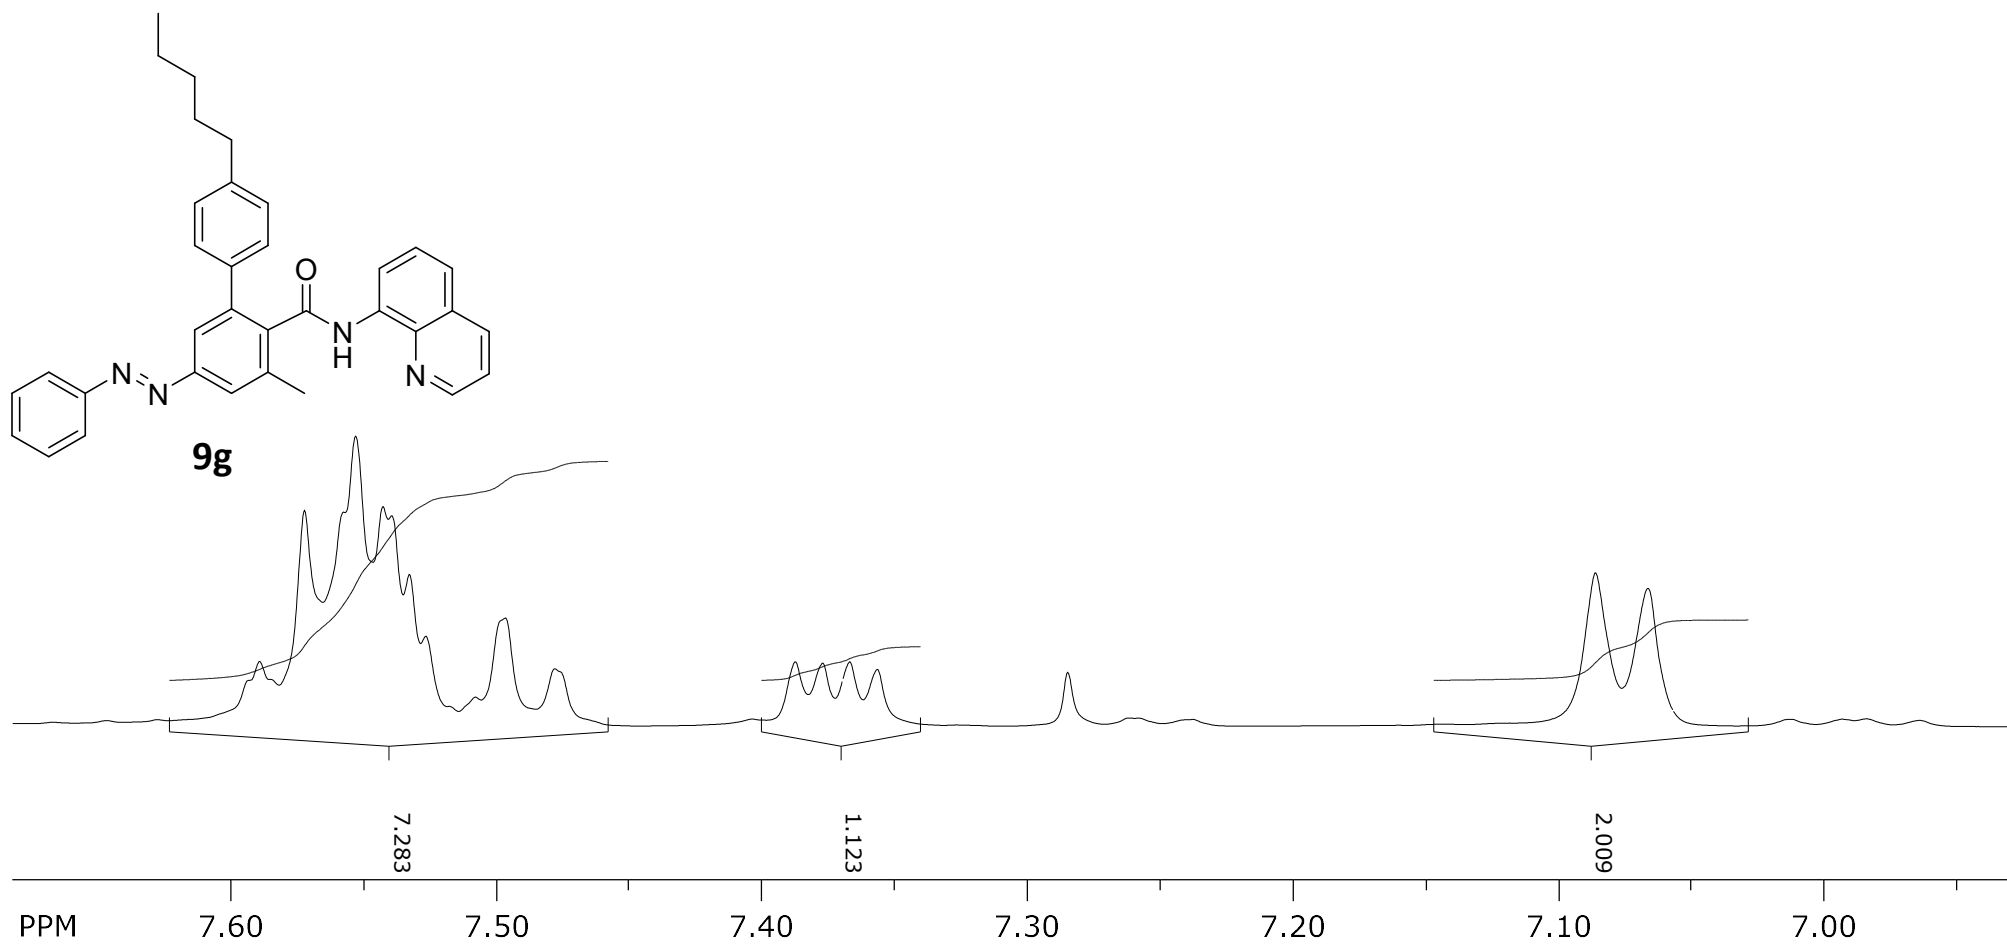



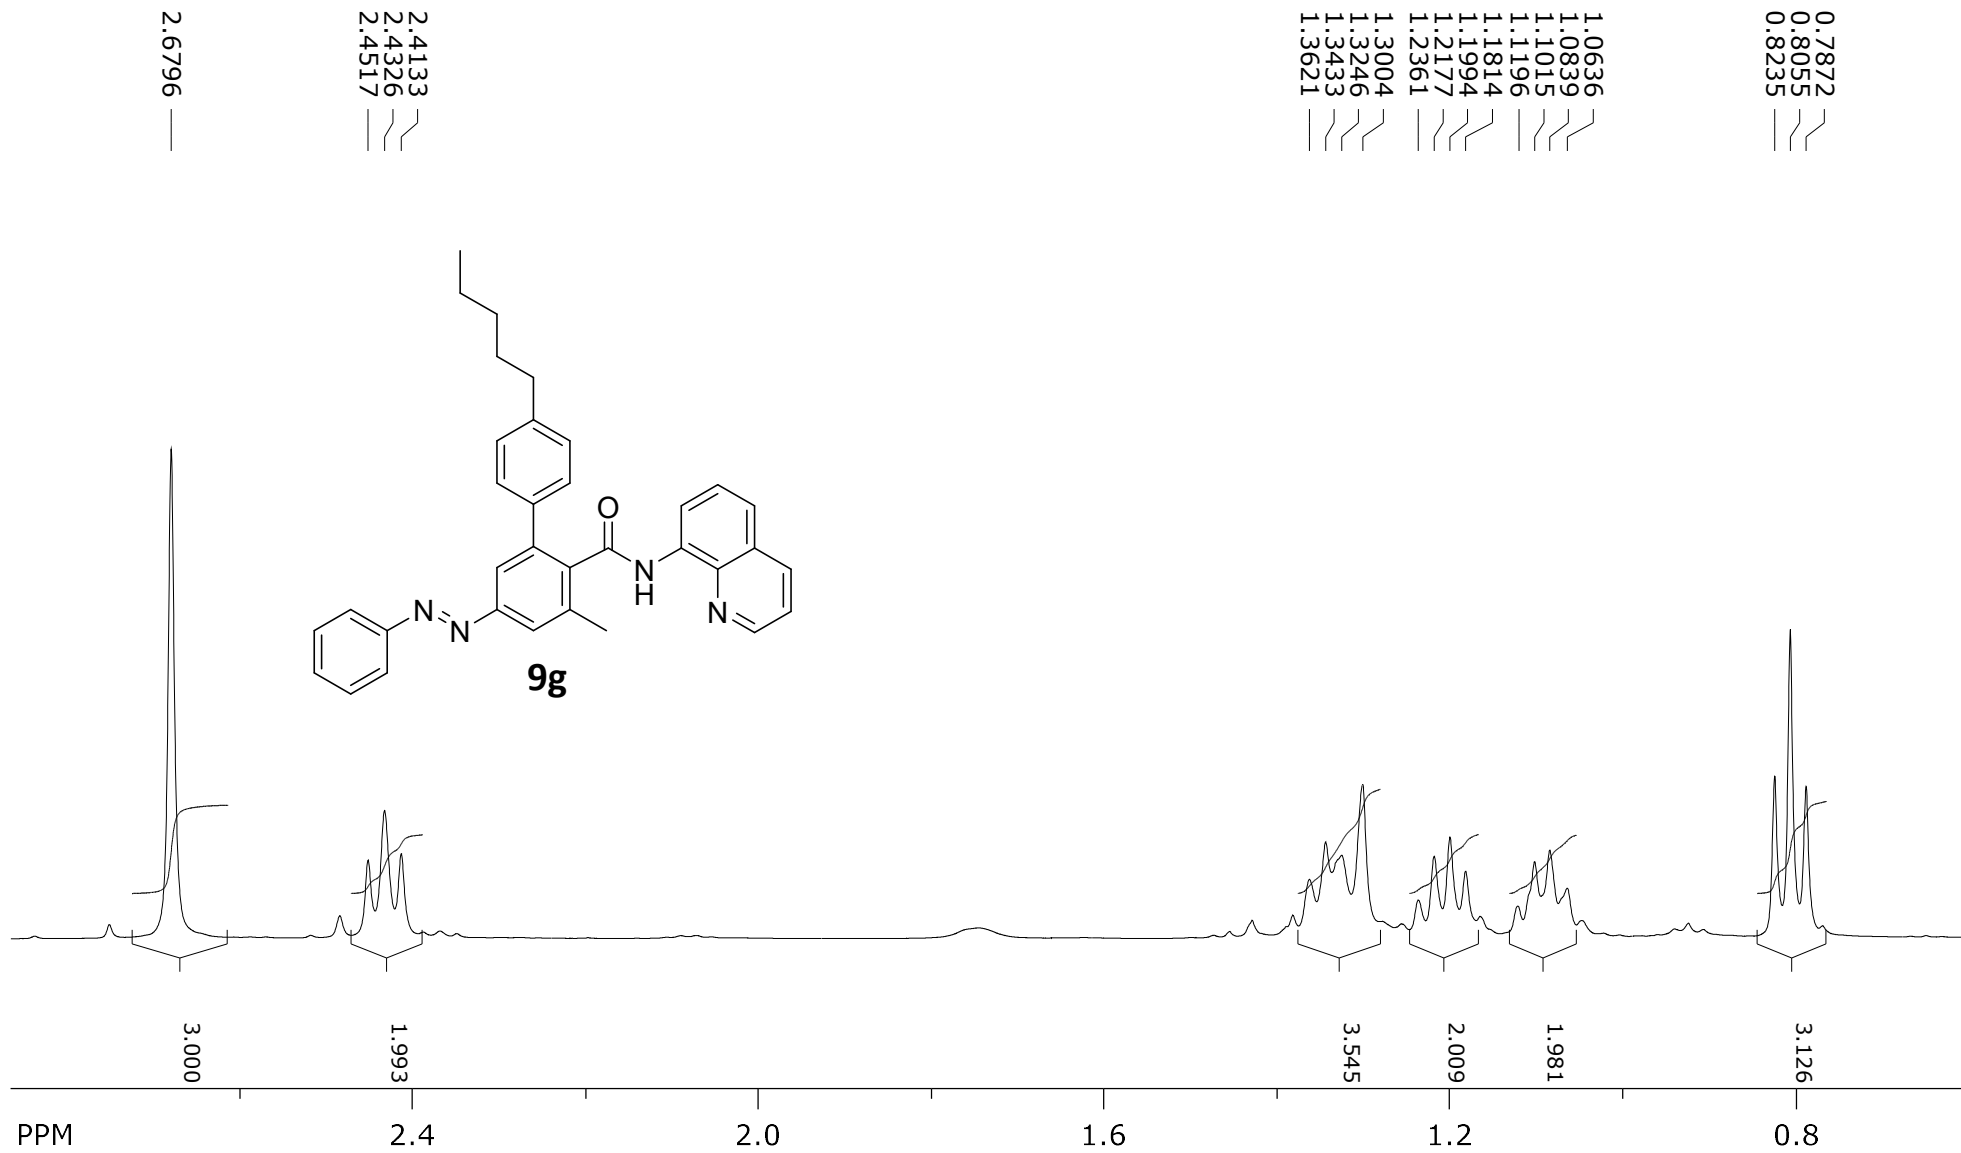

SpinWorks 4: RP 1193 A2  
C13CPD CDCl3 /opt/topspin3.5pl2/nmrdata nmrsu 26

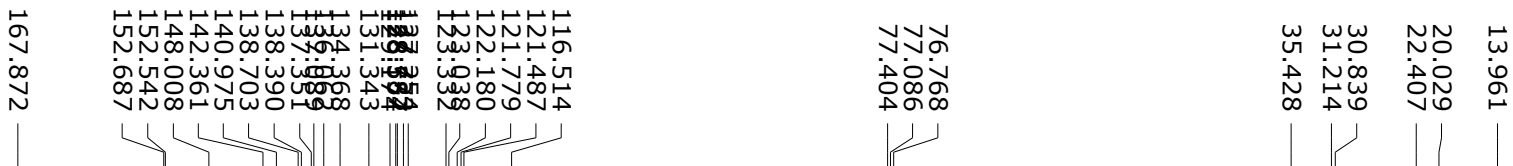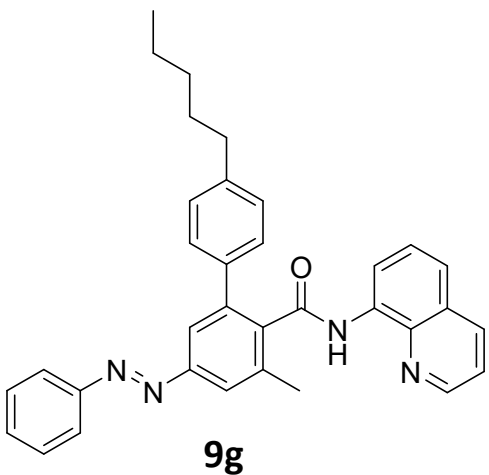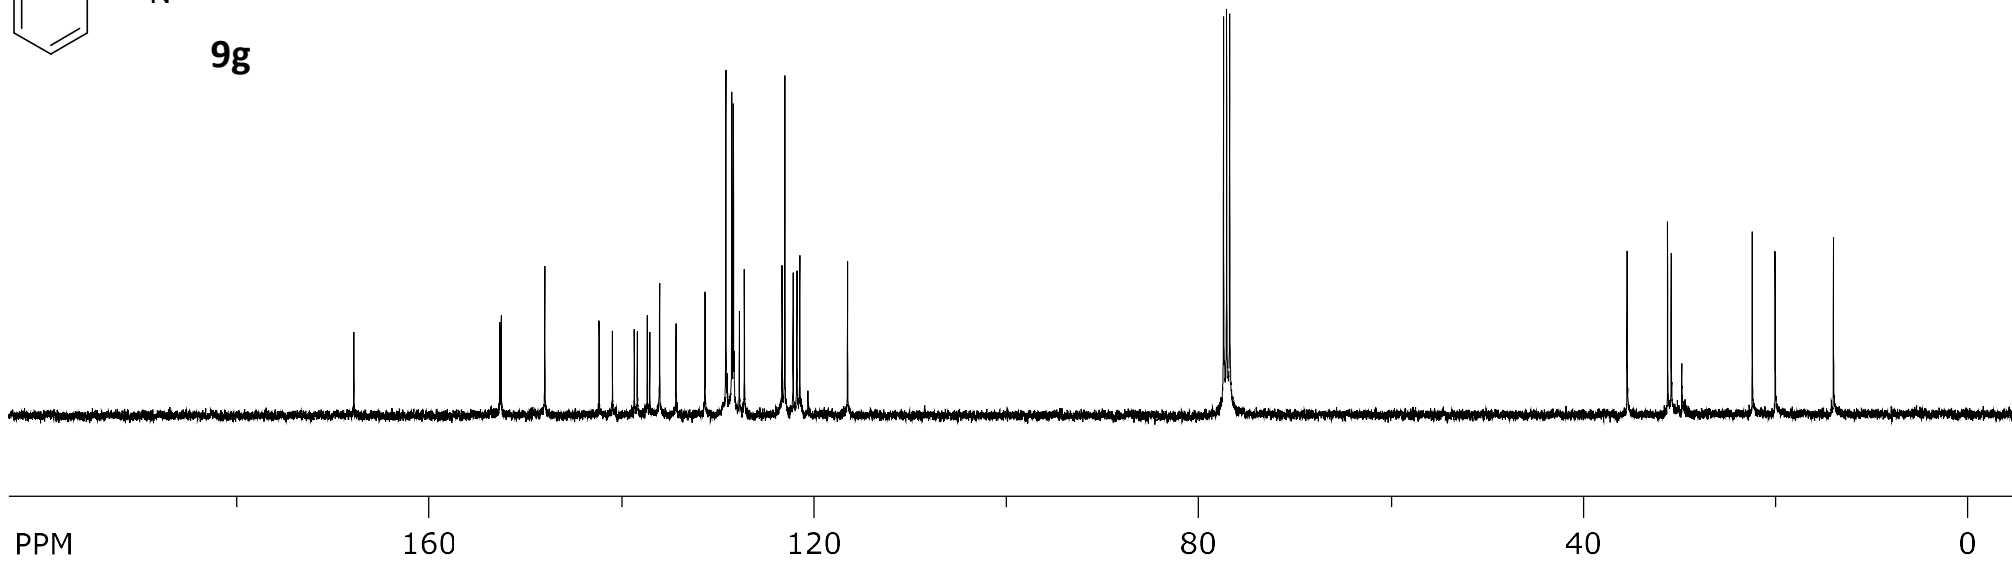

SpinWorks 4: RP 1193 A2  
C13CPD CDCl3 /opt/topspin3.5pl2/nmrdata nmrsu 26

152.542  
152.687

148.008

142.361

140.975

138.703

138.390

137.351

137.089

136.062

134.368

131.343

129.174

128.554

128.387

127.773

127.254

123.332

122.180

121.779

121.487

116.514

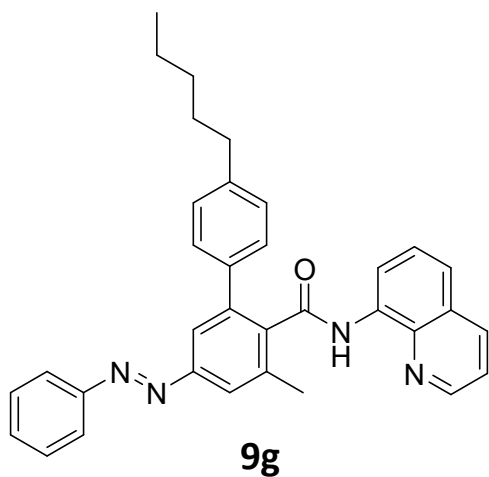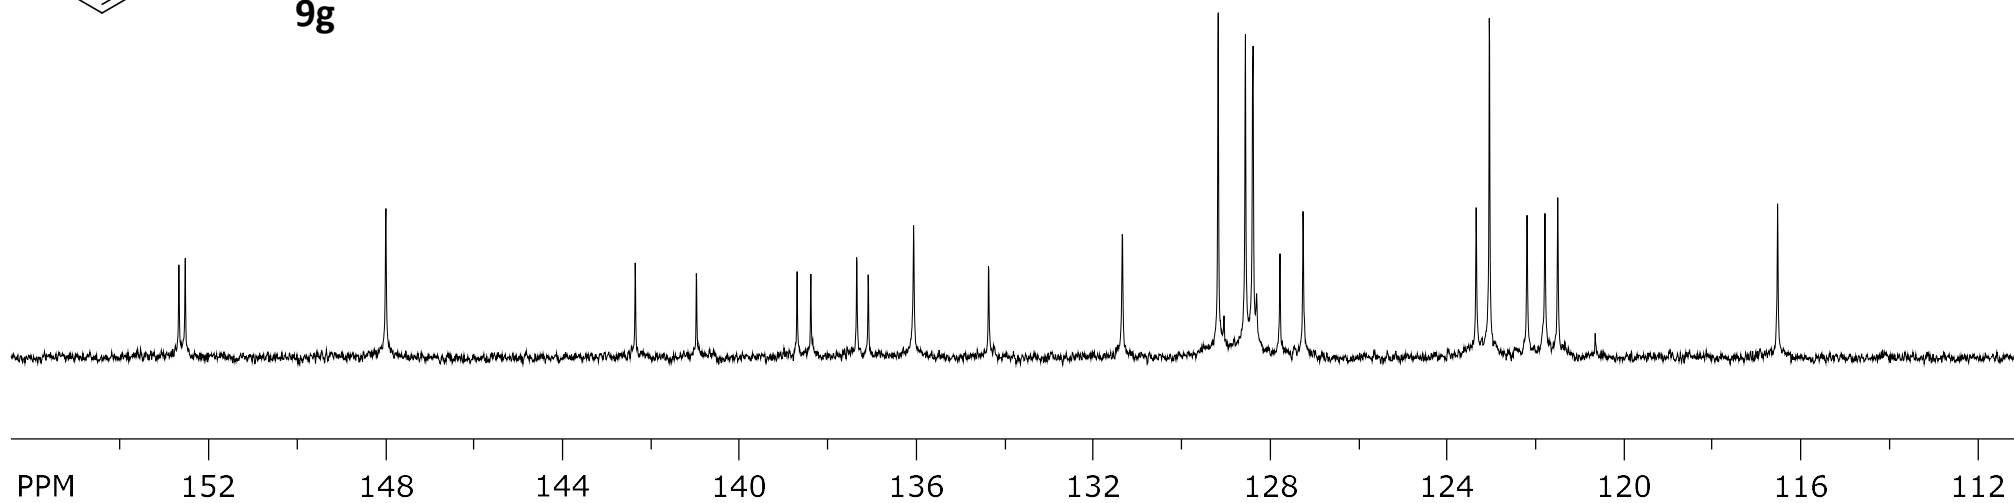

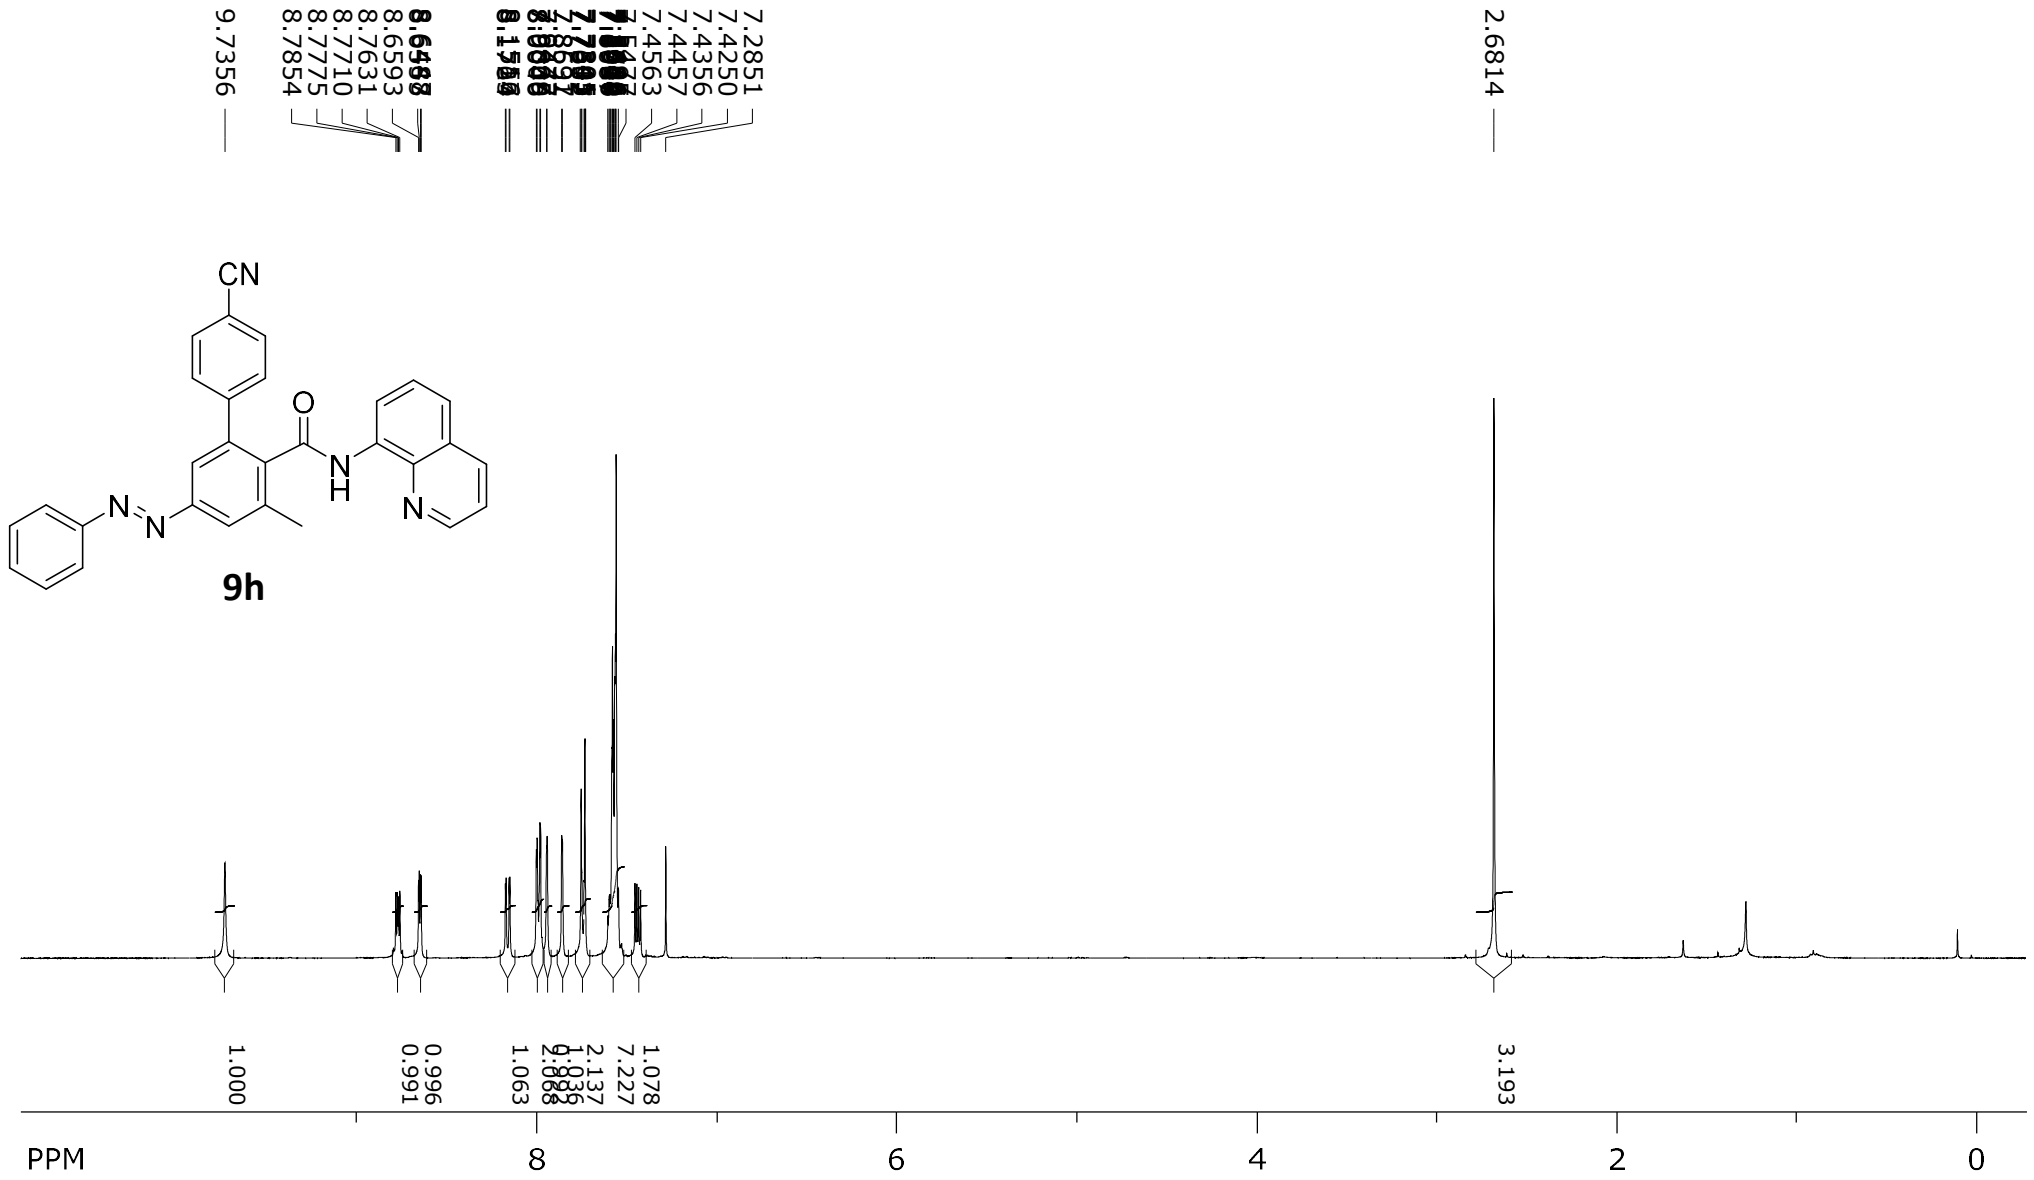

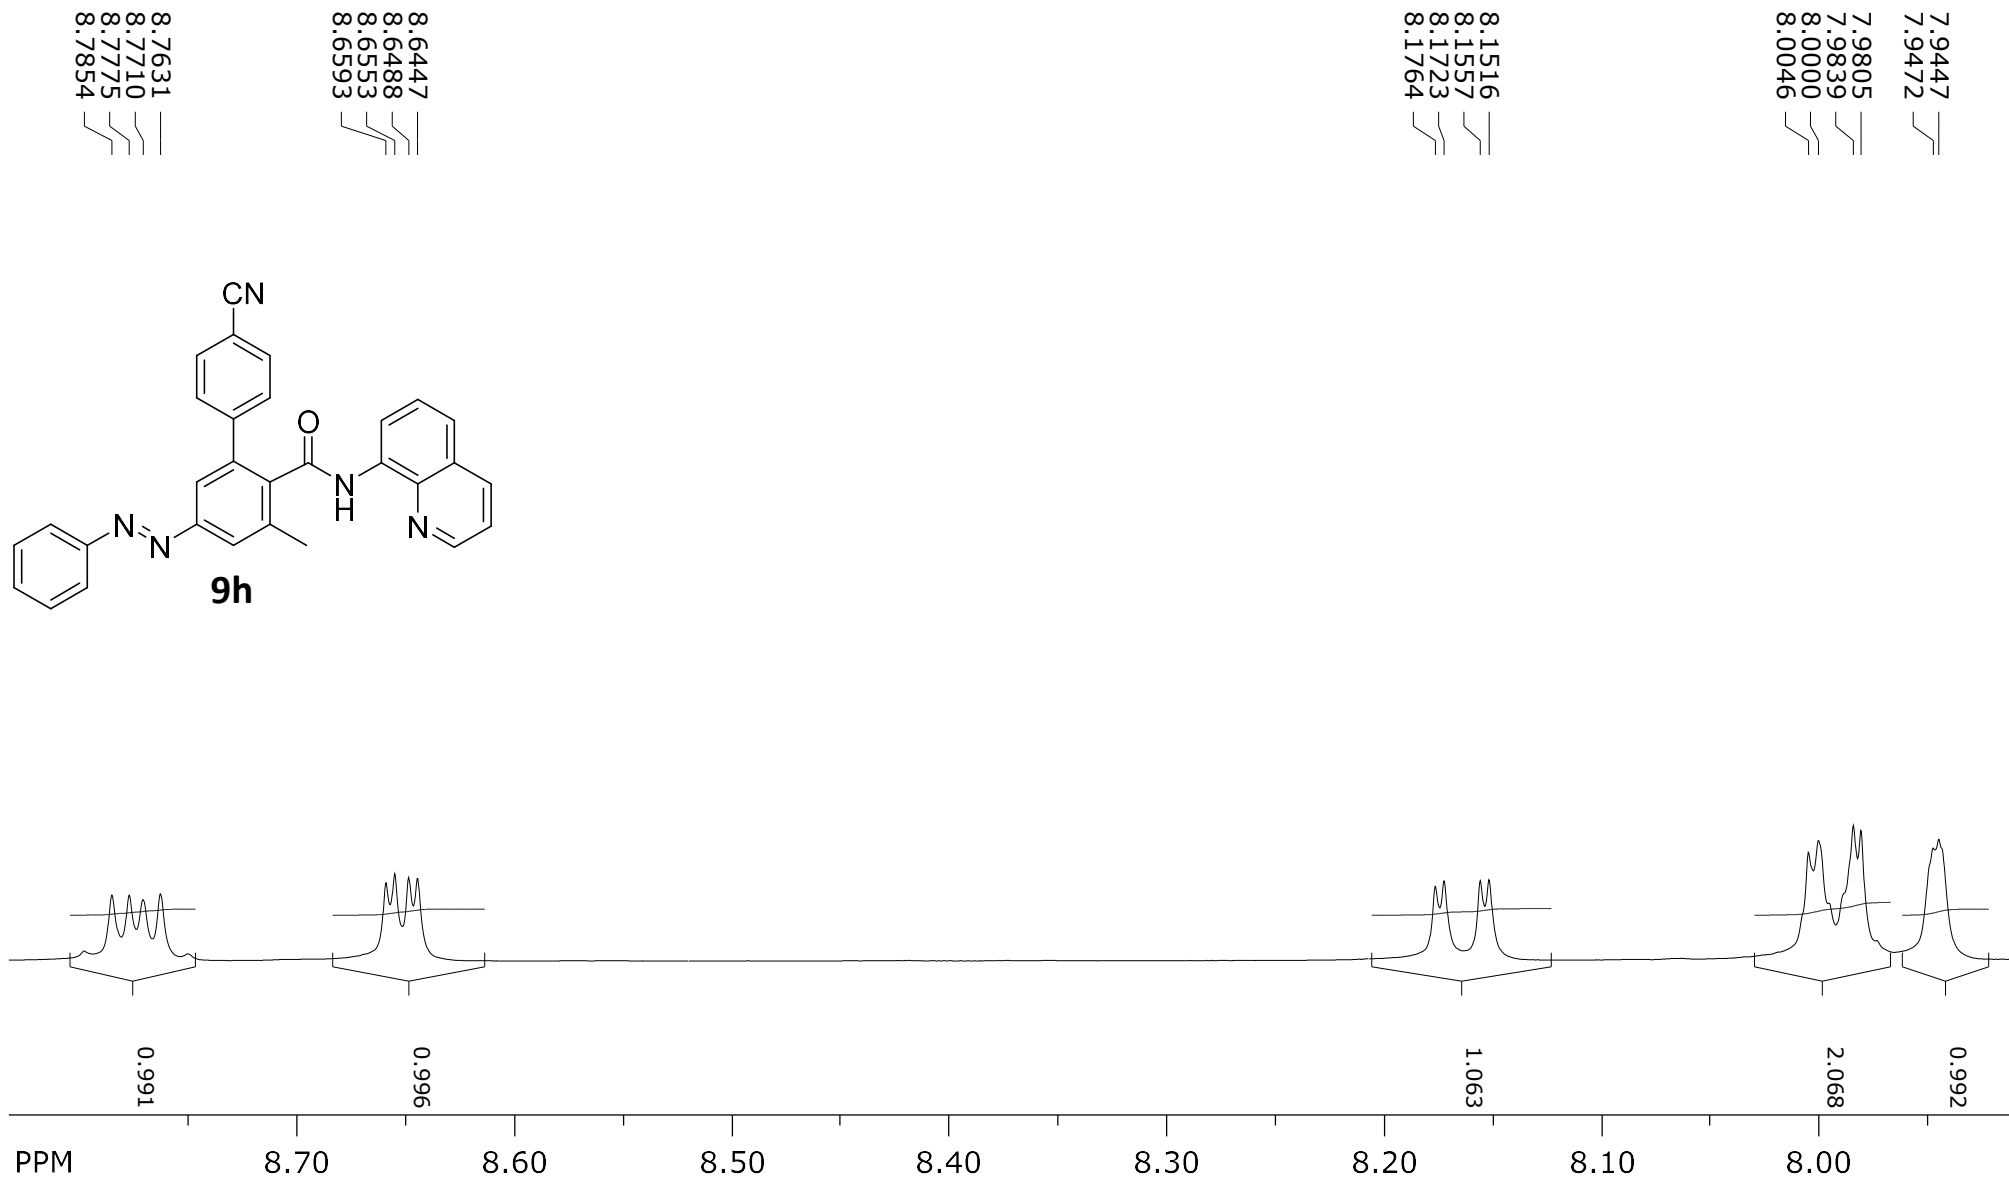

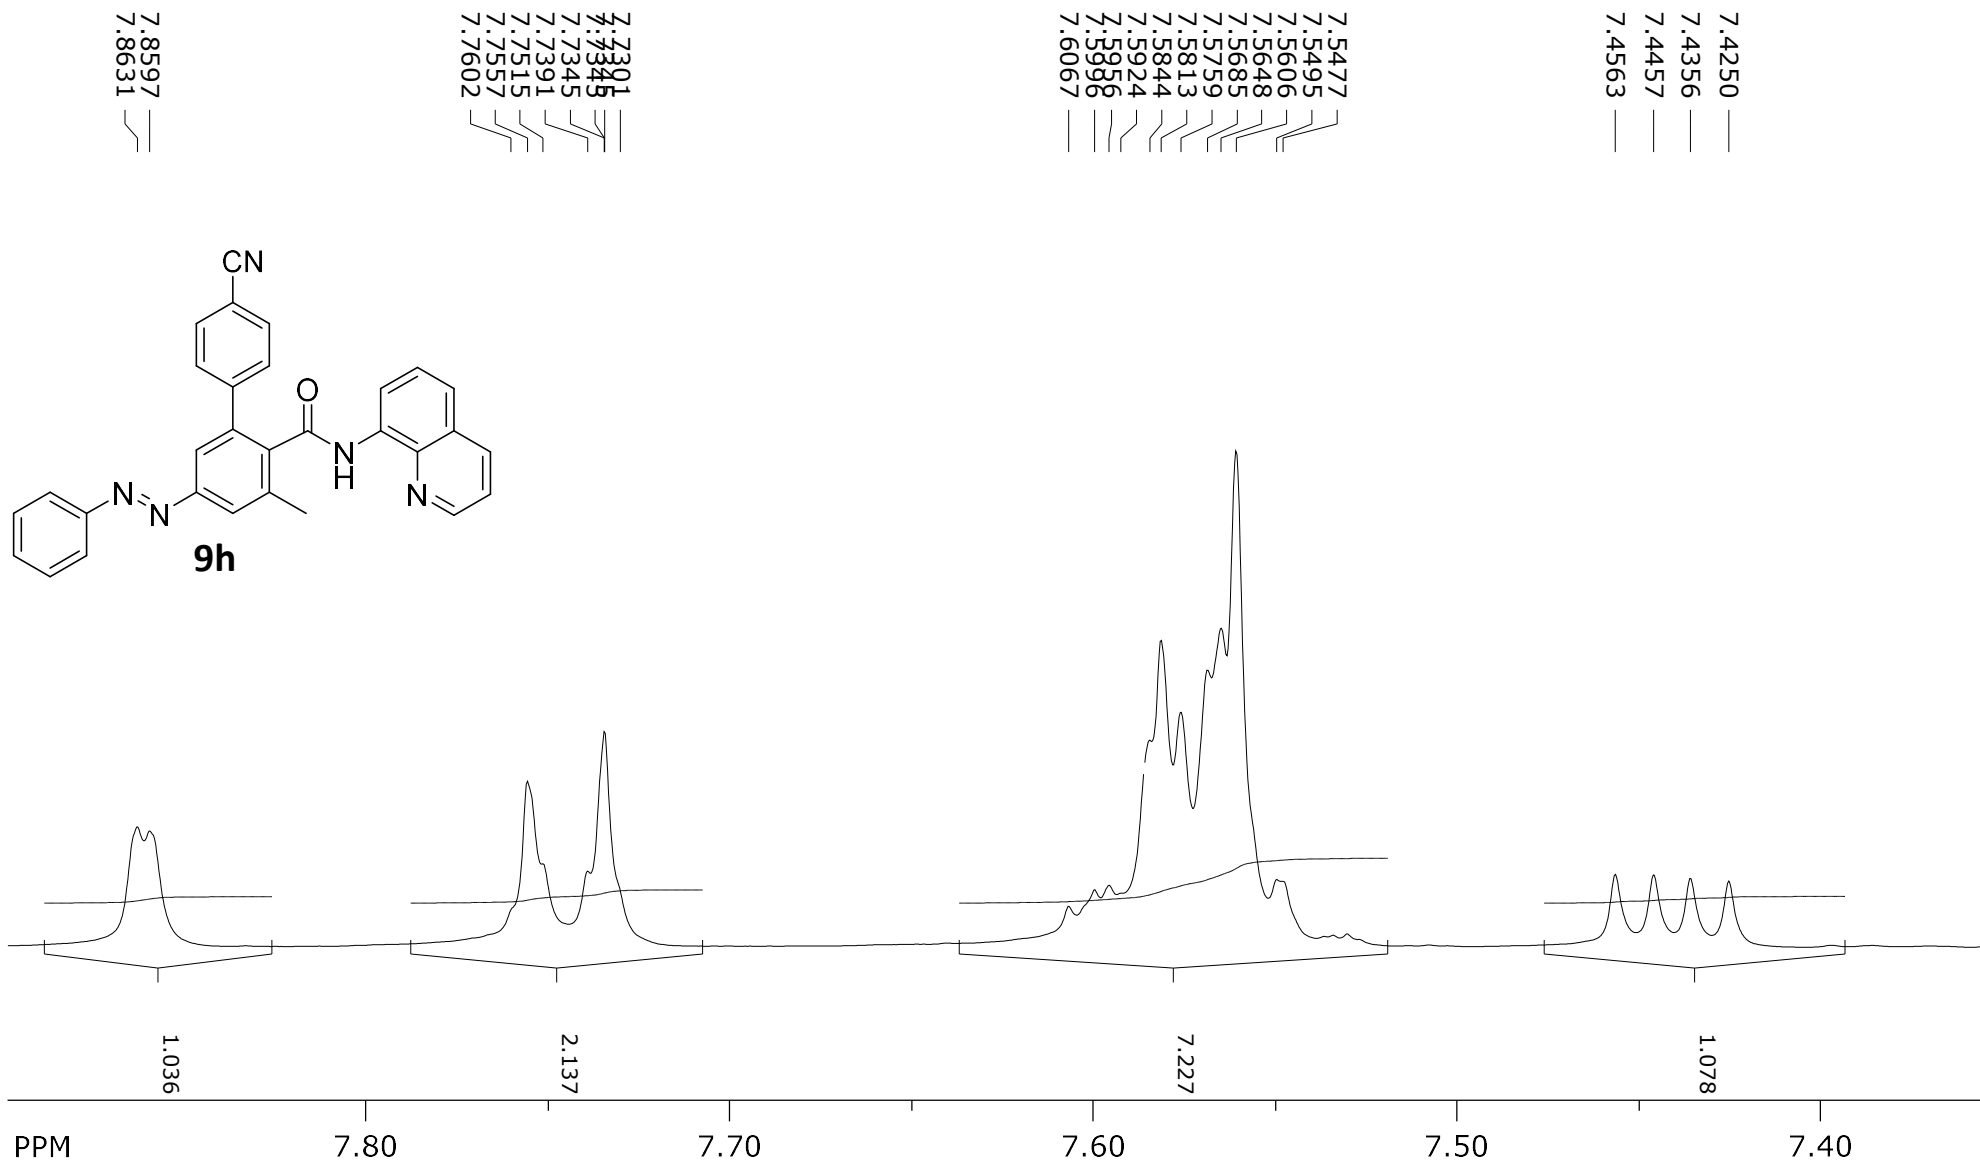

SpinWorks 4: RP 1207 B2  
C13CPD CDCl3 /opt/topspin3.5pl2/nmrdata nmrsu 8

166.982 —  
152.578 —  
148.225 —  
144.565 —  
138.841 —  
138.448 —  
138.299 —  
137.806 —  
136.401 —  
133.876 —  
131.696 —  
129.953 —  
129.853 —  
127.953 —  
124.905 —  
123.494 —  
122.494 —  
121.766 —  
121.583 —  
118.633 —  
116.727 —  
111.485 —

76.766 —  
77.084 —  
77.402 —

19.980 —

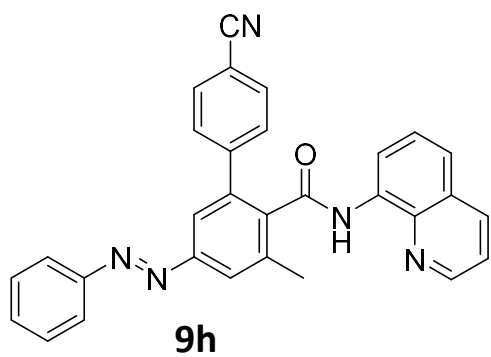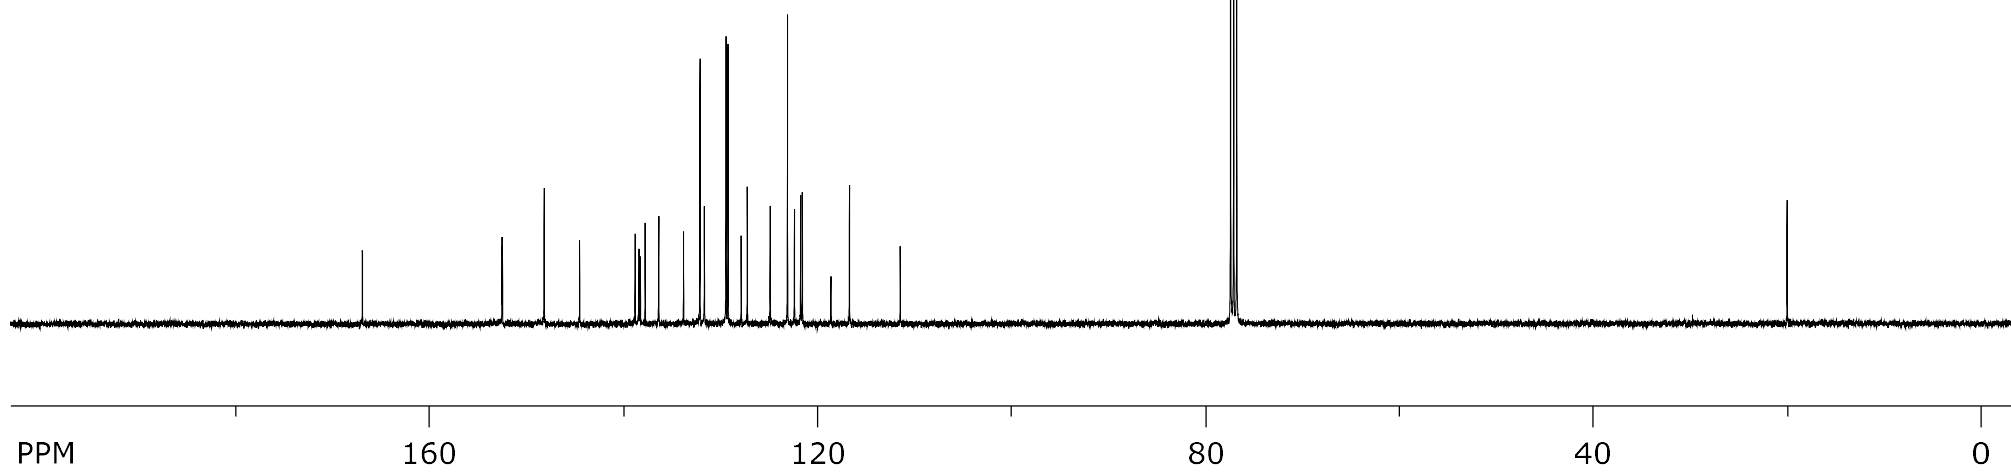

SpinWorks 4: RP 1207 B2  
C13CPD CDCl3 /opt/topspin3.5pl2/nmrdata nmrsu 8

152.527  
152.578  
148.225  
144.565  
138.841  
138.448  
138.299  
137.806  
136.401  
133.846  
132.150  
131.696  
129.458  
129.257  
127.895  
127.263  
124.905  
123.120  
122.404  
121.766  
121.583  
118.633  
116.727  
111.485

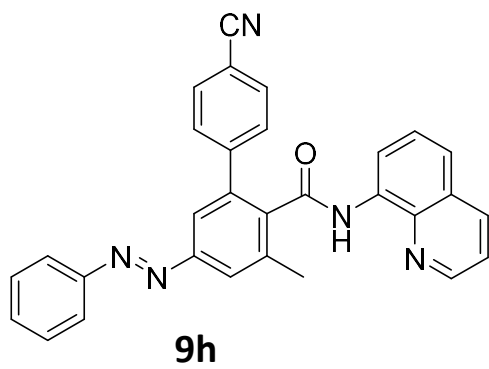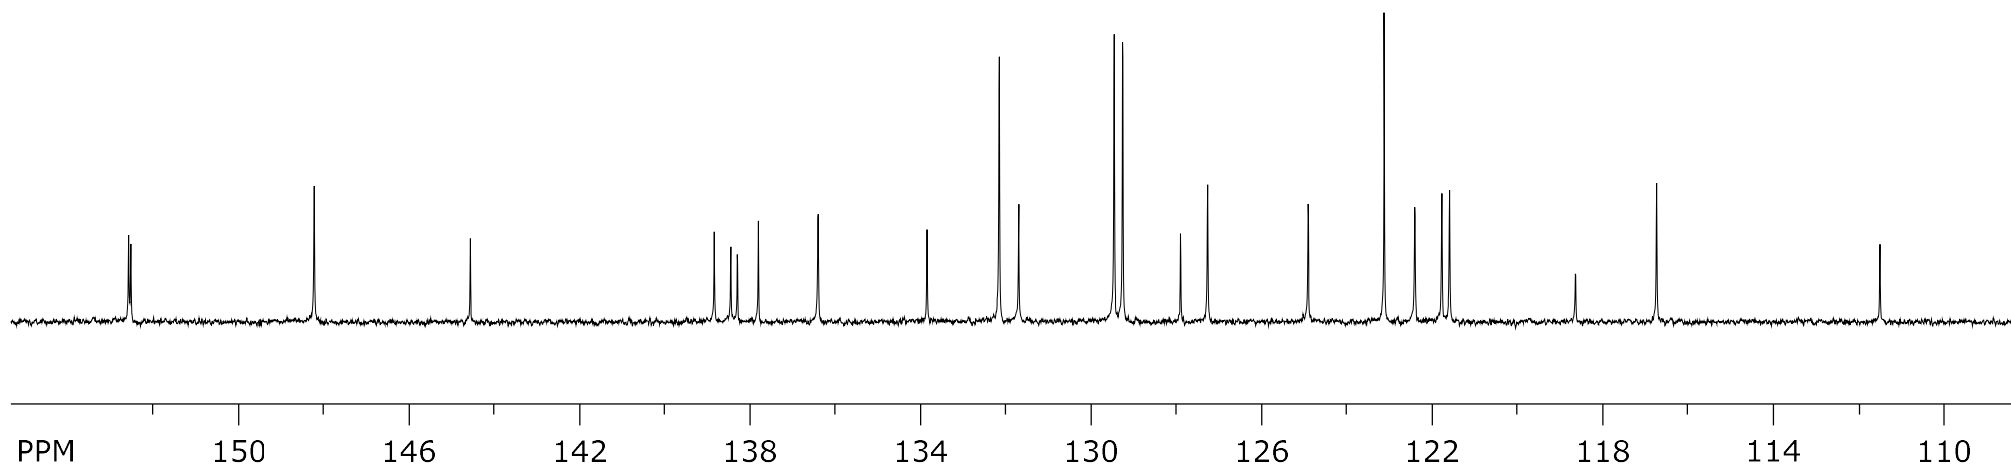



SpinWorks 4: RP-1195A1+A3

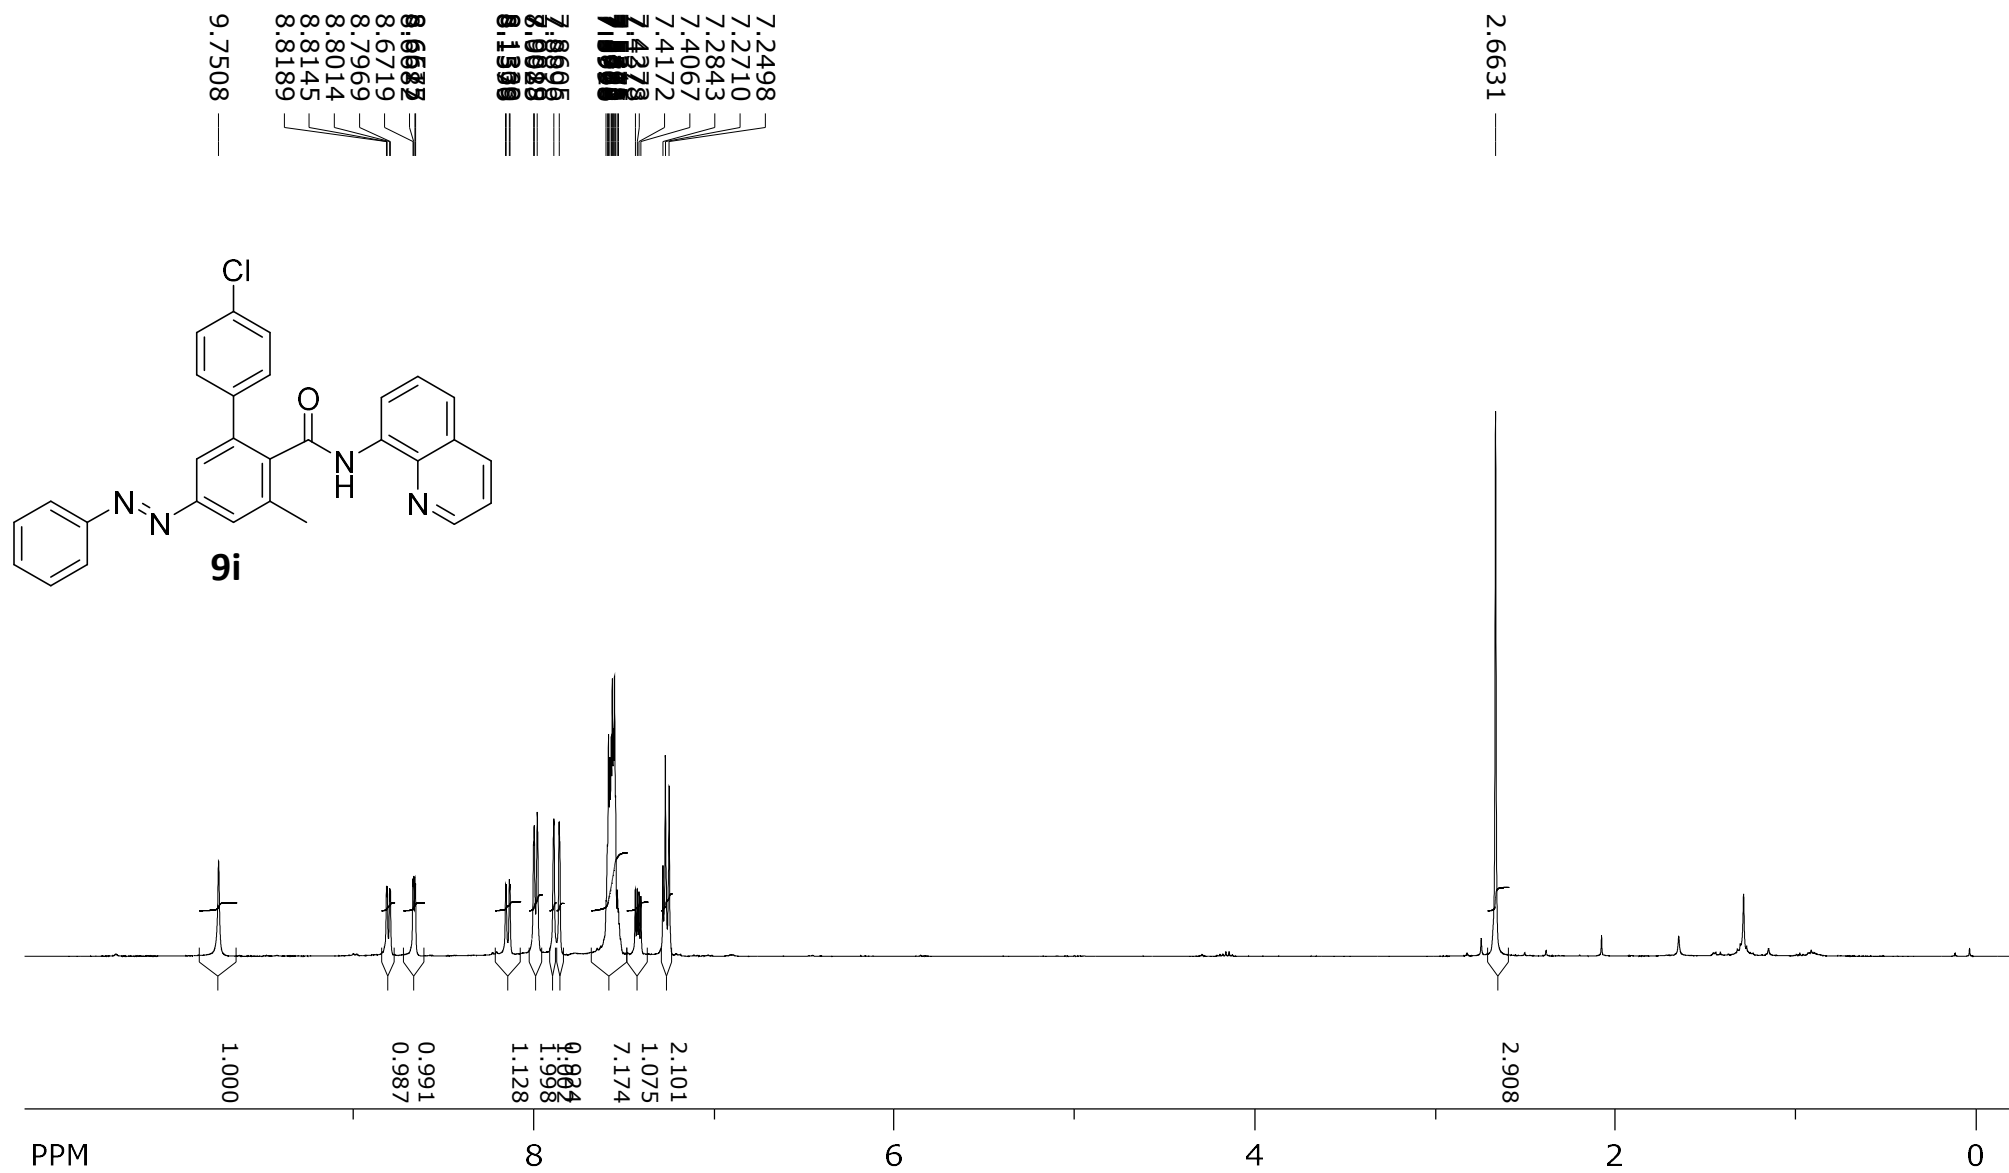

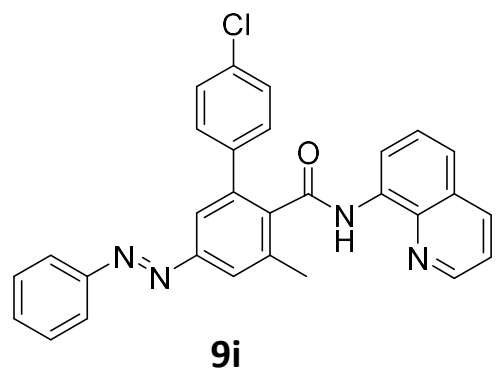

8.7969  
8.8014  
8.8145  
8.8189

8.6577  
8.6615  
8.6682  
8.6719

8.1333  
8.1369  
8.1539  
8.1576

7.9819  
7.9988  
8.0025

7.8605  
7.8896

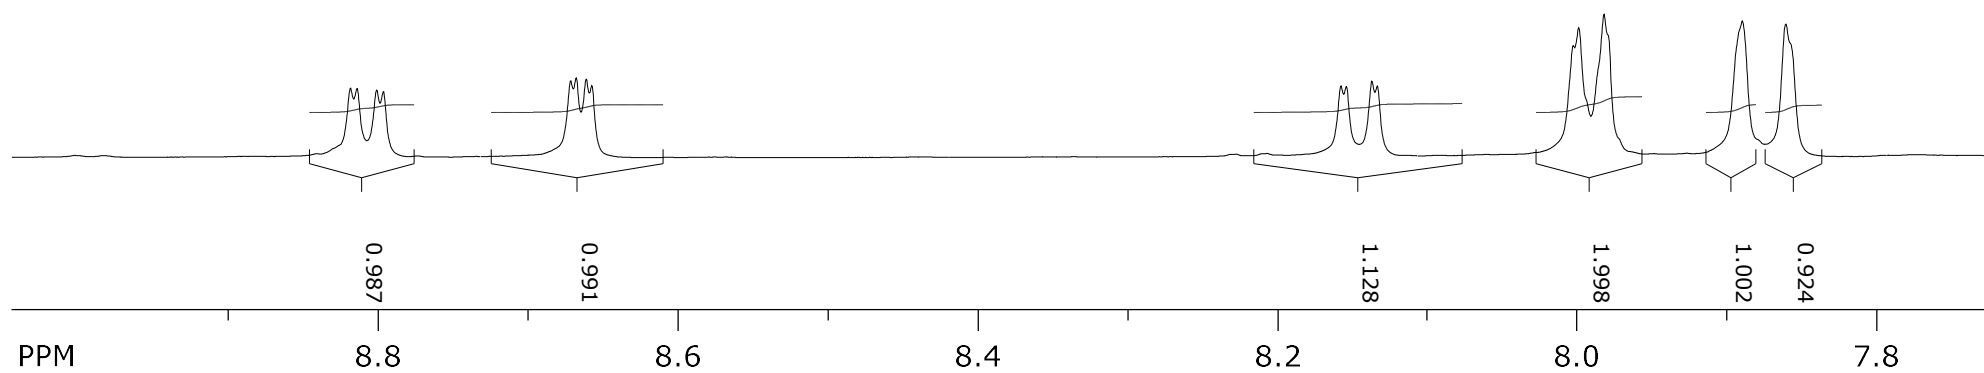

7.5311  
7.5375  
7.5473  
7.5535  
7.5593  
7.5652  
7.5712  
7.5788  
7.5866  
7.5925  
7.5998

7.4067  
7.4172  
7.4273  
7.4378

7.2498  
7.2710  
7.2843

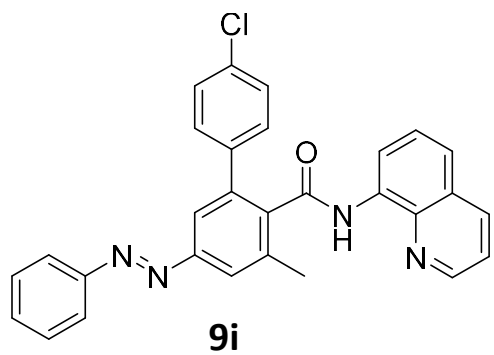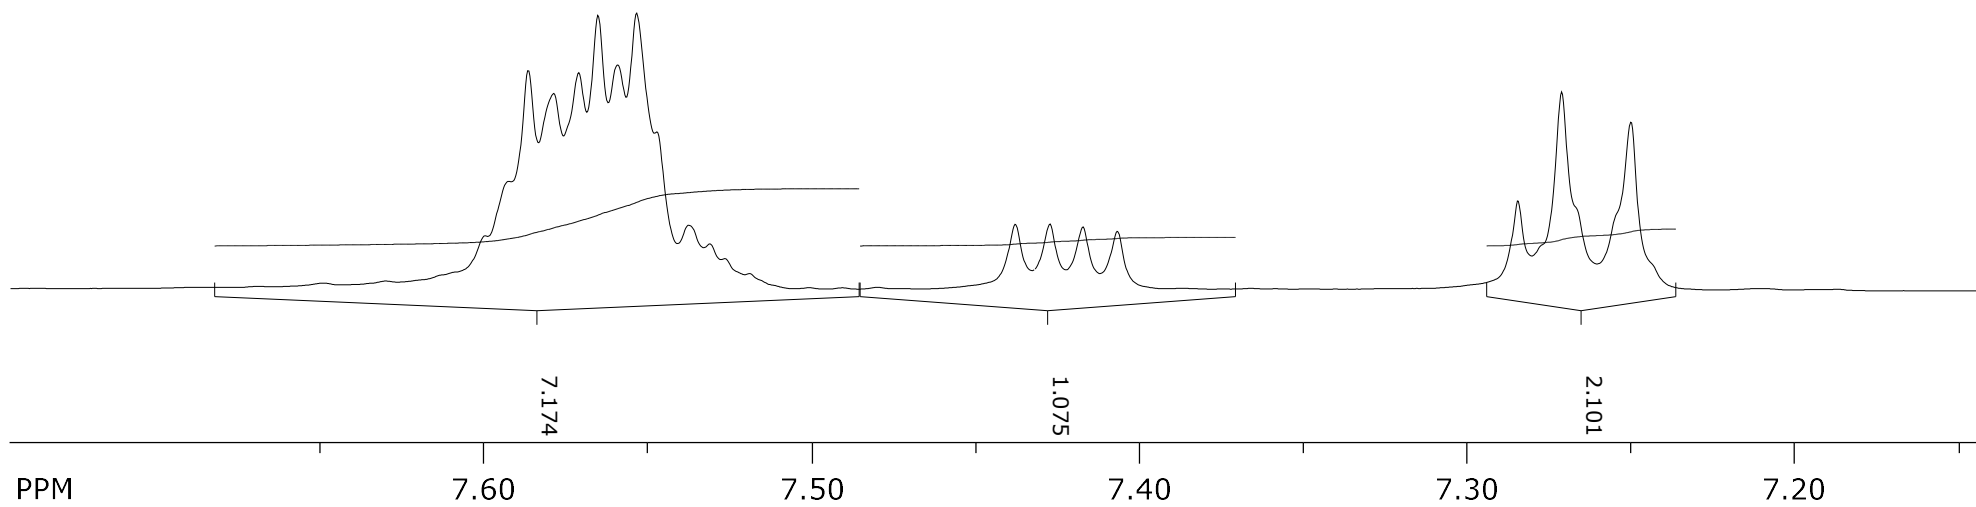

SpinWorks 4: RP 1195 A1 A3  
C13CPD CDCl3 /opt/topspin3.5pl2/nmrdata nmrsu 17

167.470 —  
152.605  
152.533  
148.205  
139.487  
138.600  
138.396  
138.286  
137.447  
137.427  
132.999  
131.523  
130.954  
127.955  
127.954  
123.922  
123.086  
122.172  
122.031  
121.665  
116.735

76.789  
77.106  
77.424

19.995 —

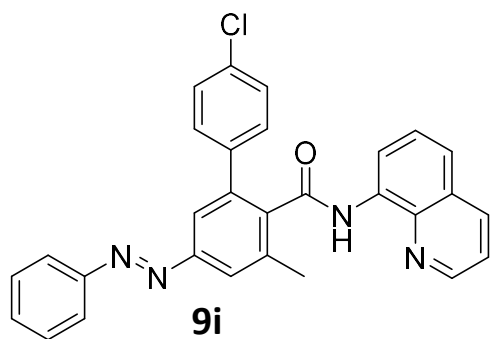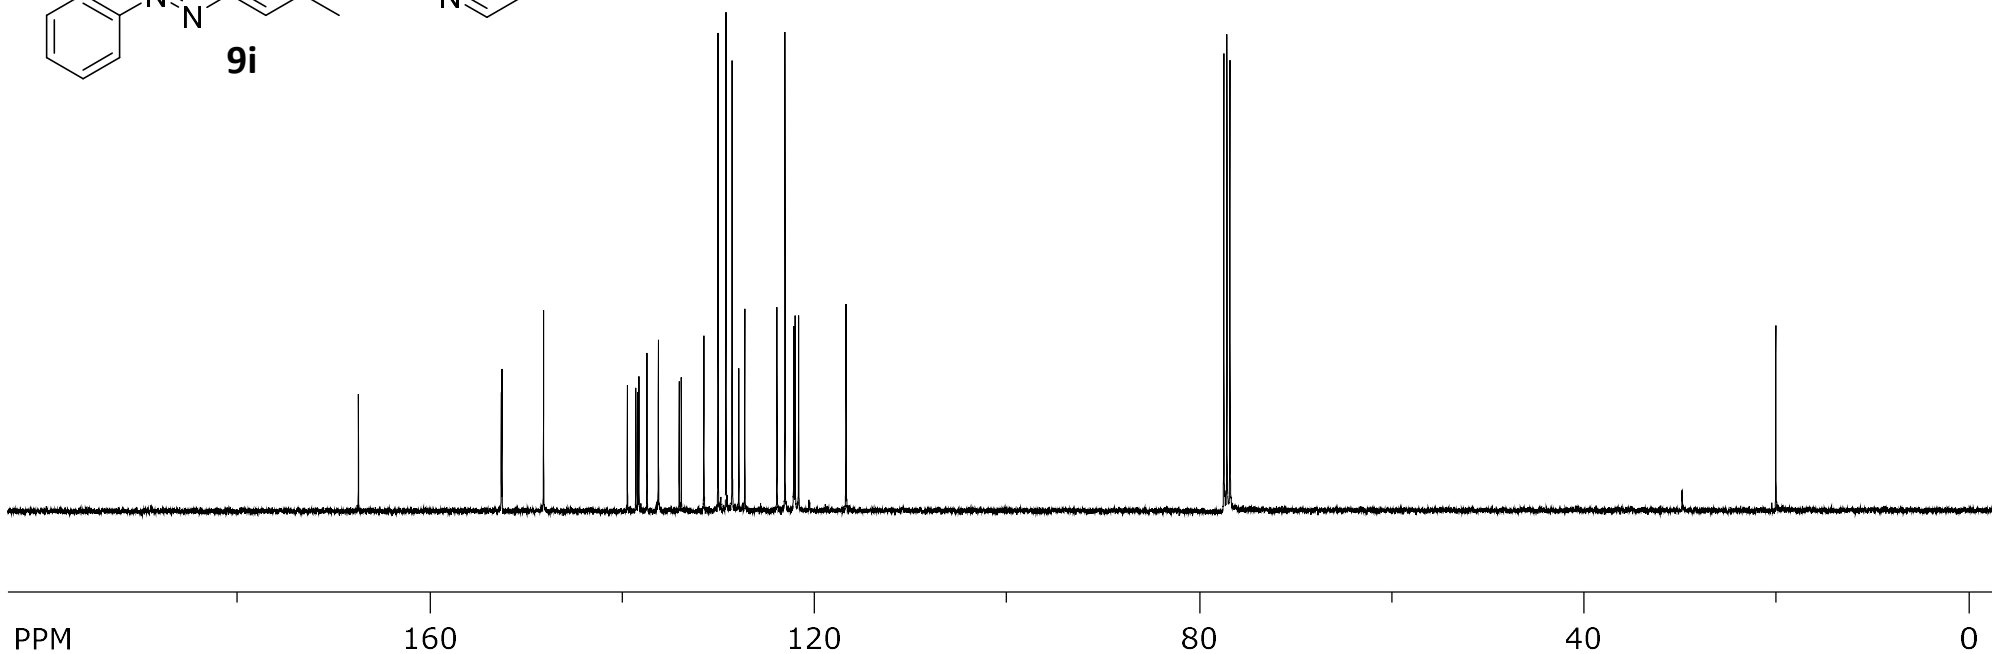

SpinWorks 4: RP 1195 A1 A3  
C13CPD CDCl3 /opt/topspin3.5pl2/nmrdata nmrsu 17

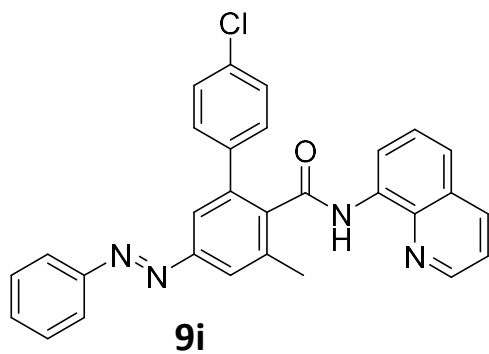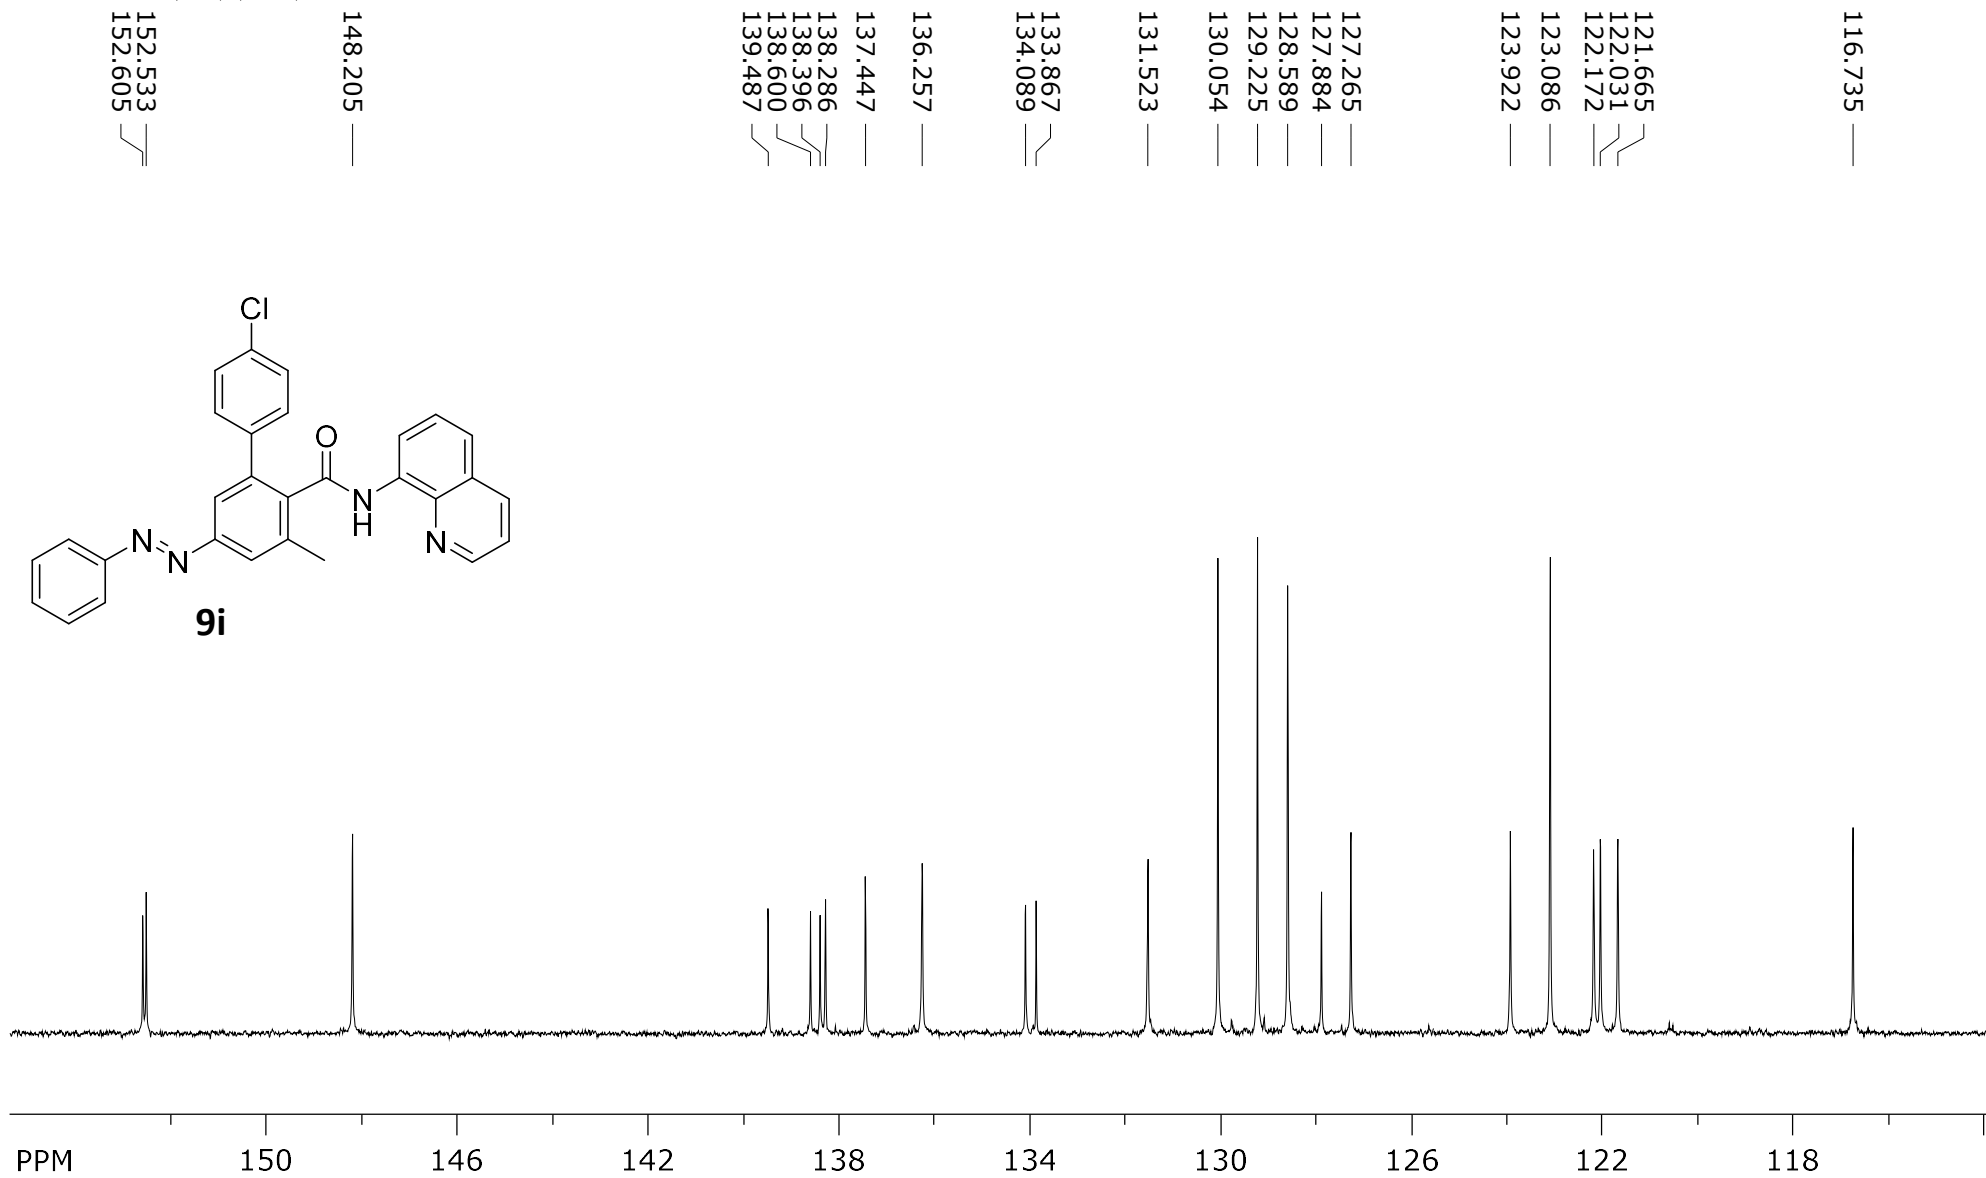

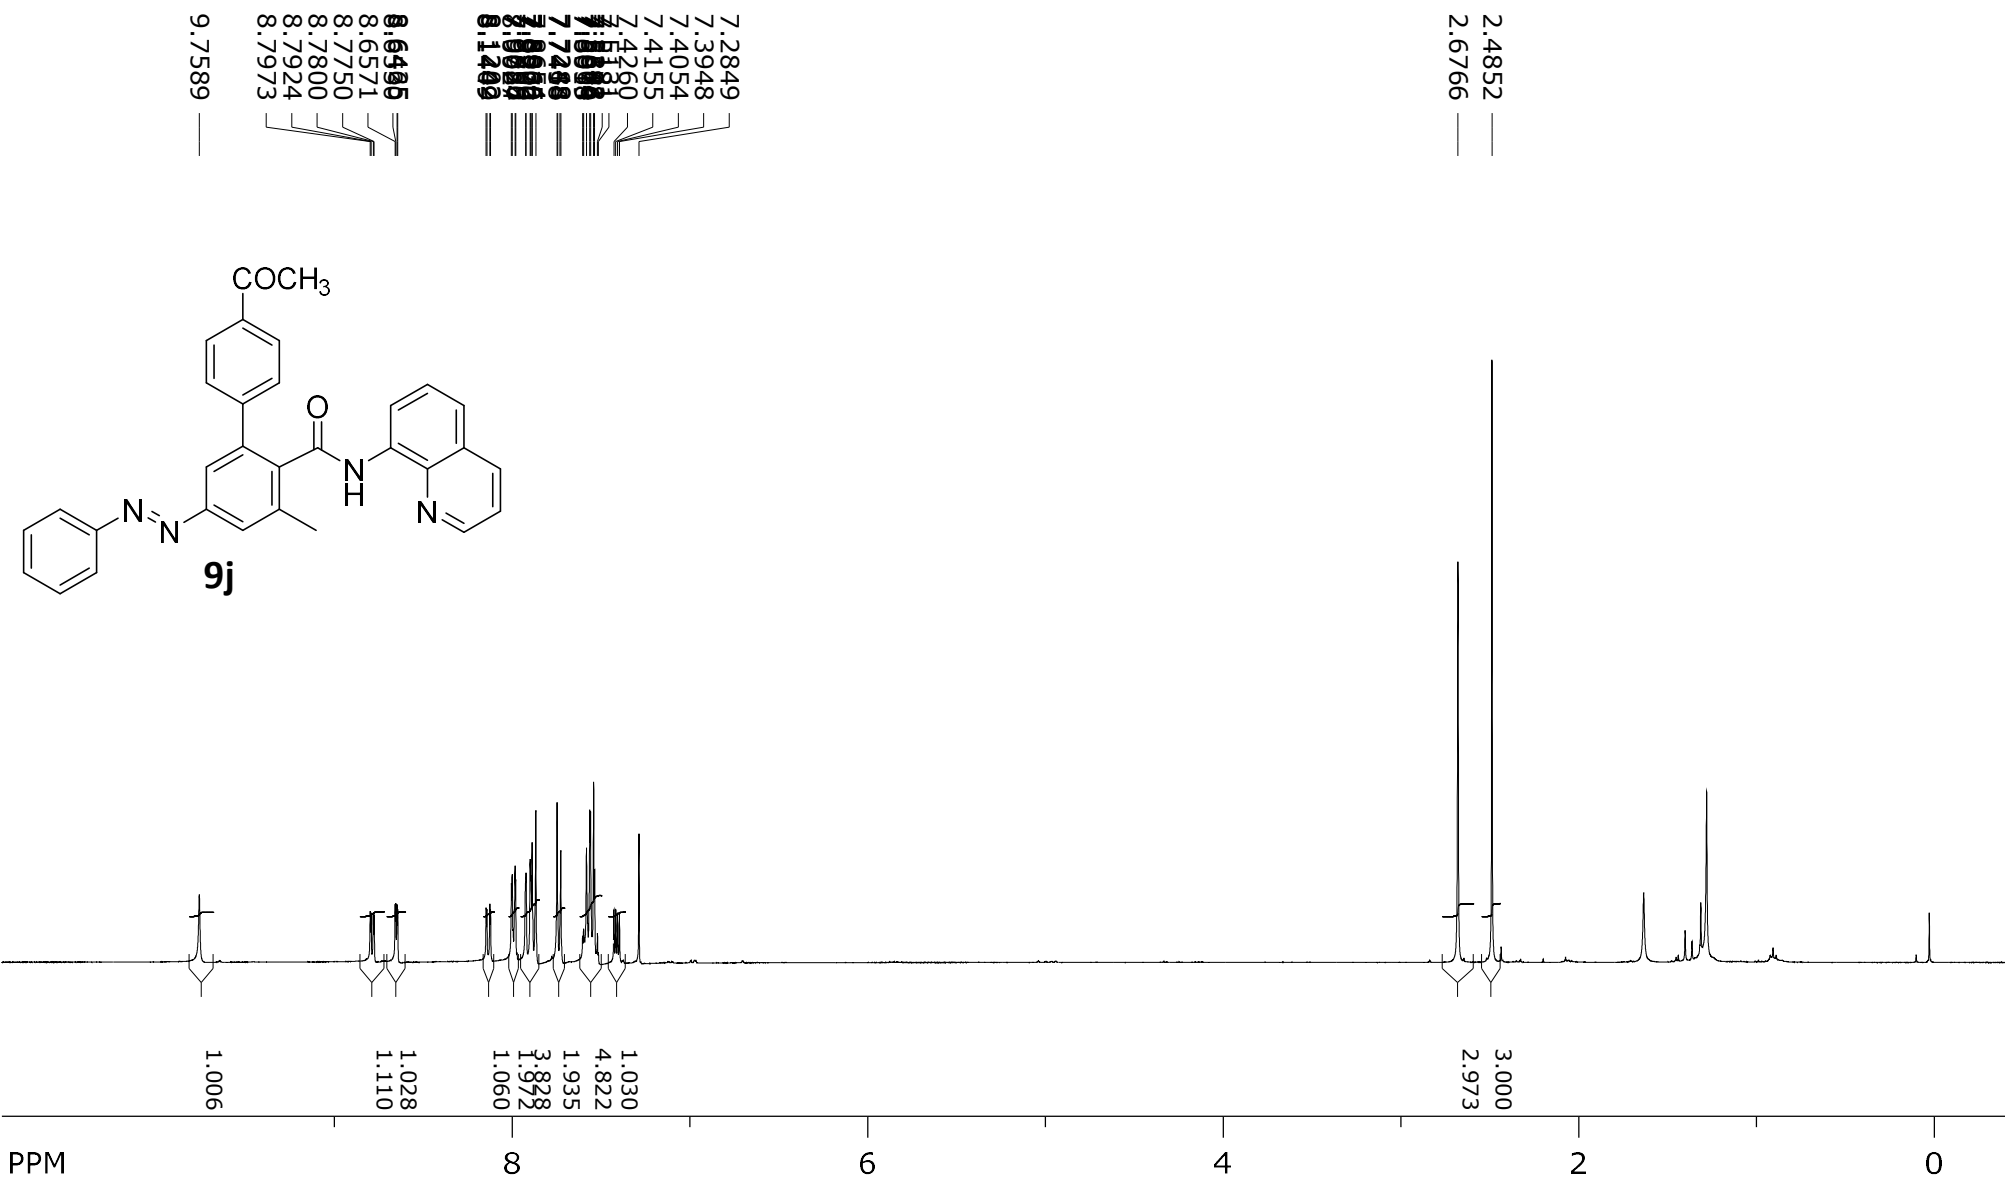

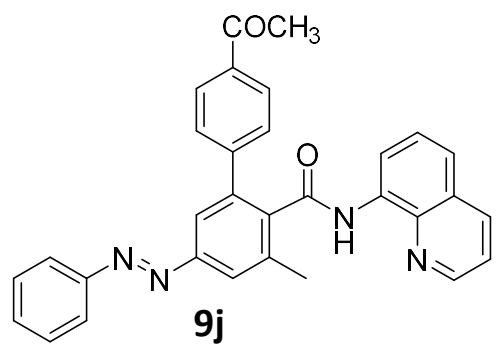

8.7750  
8.7800  
8.7924  
8.7973

8.6425  
8.6465  
8.6530  
8.6571

8.1202  
8.1242  
8.1409  
8.1449

7.9786  
7.9820  
7.9984  
8.0027

7.9206  
7.9230  
7.8865  
7.8930  
7.8972

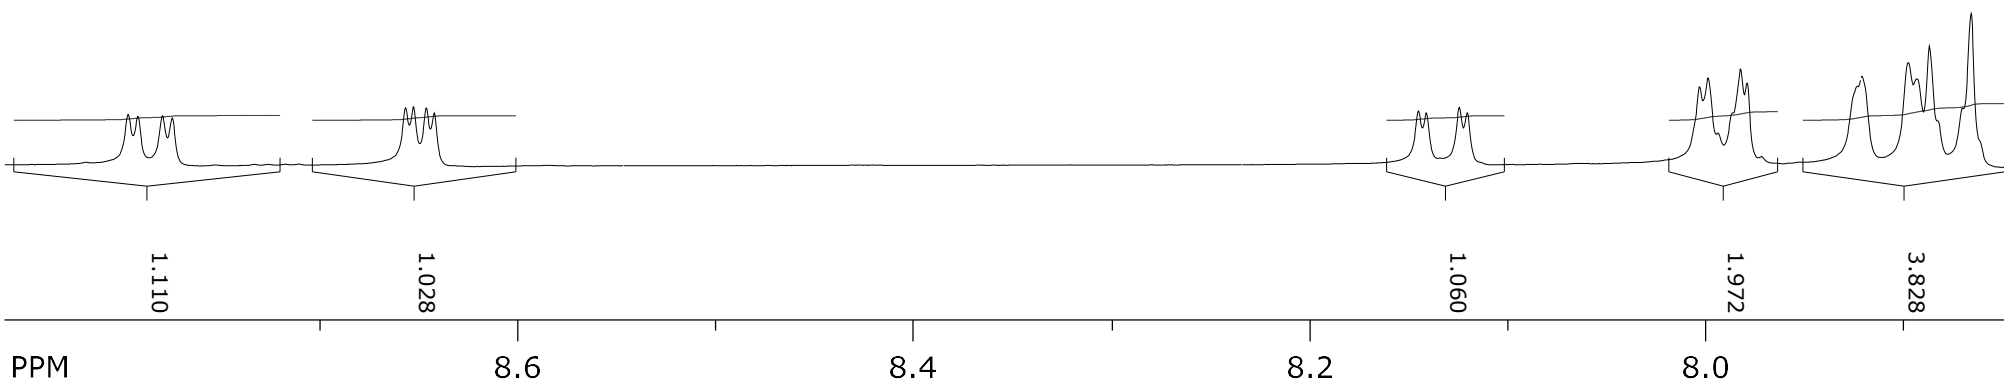

SpinWorks 4: RP-1188fin

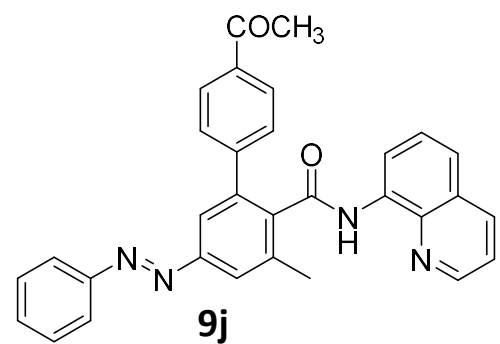

7.7248  
7.7288  
7.7414  
7.7458

7.5958  
7.6019  
7.5804  
7.5574  
7.5616  
7.5343  
7.5398  
7.5181

7.3948  
7.4054  
7.4155  
7.4260

7.2849

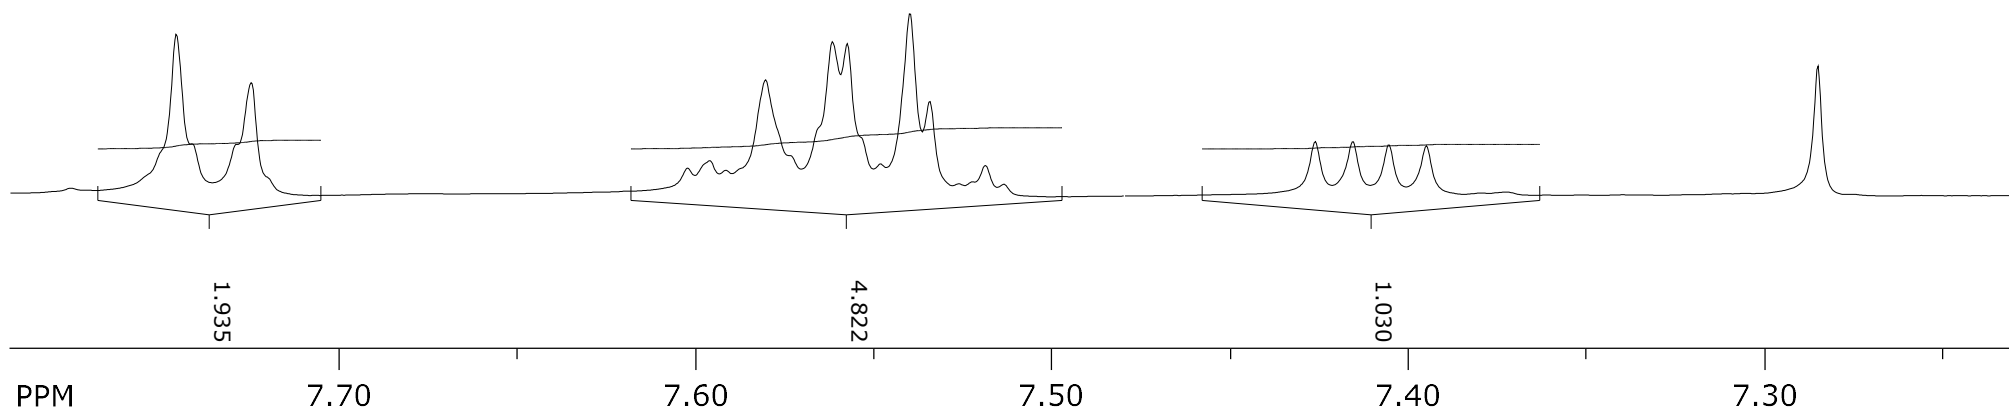



SpinWorks 4: RP 1188 FIN1  
C13CPD CDCl3 /opt/topspin3.5pl2/nmrdata nmrsu 4

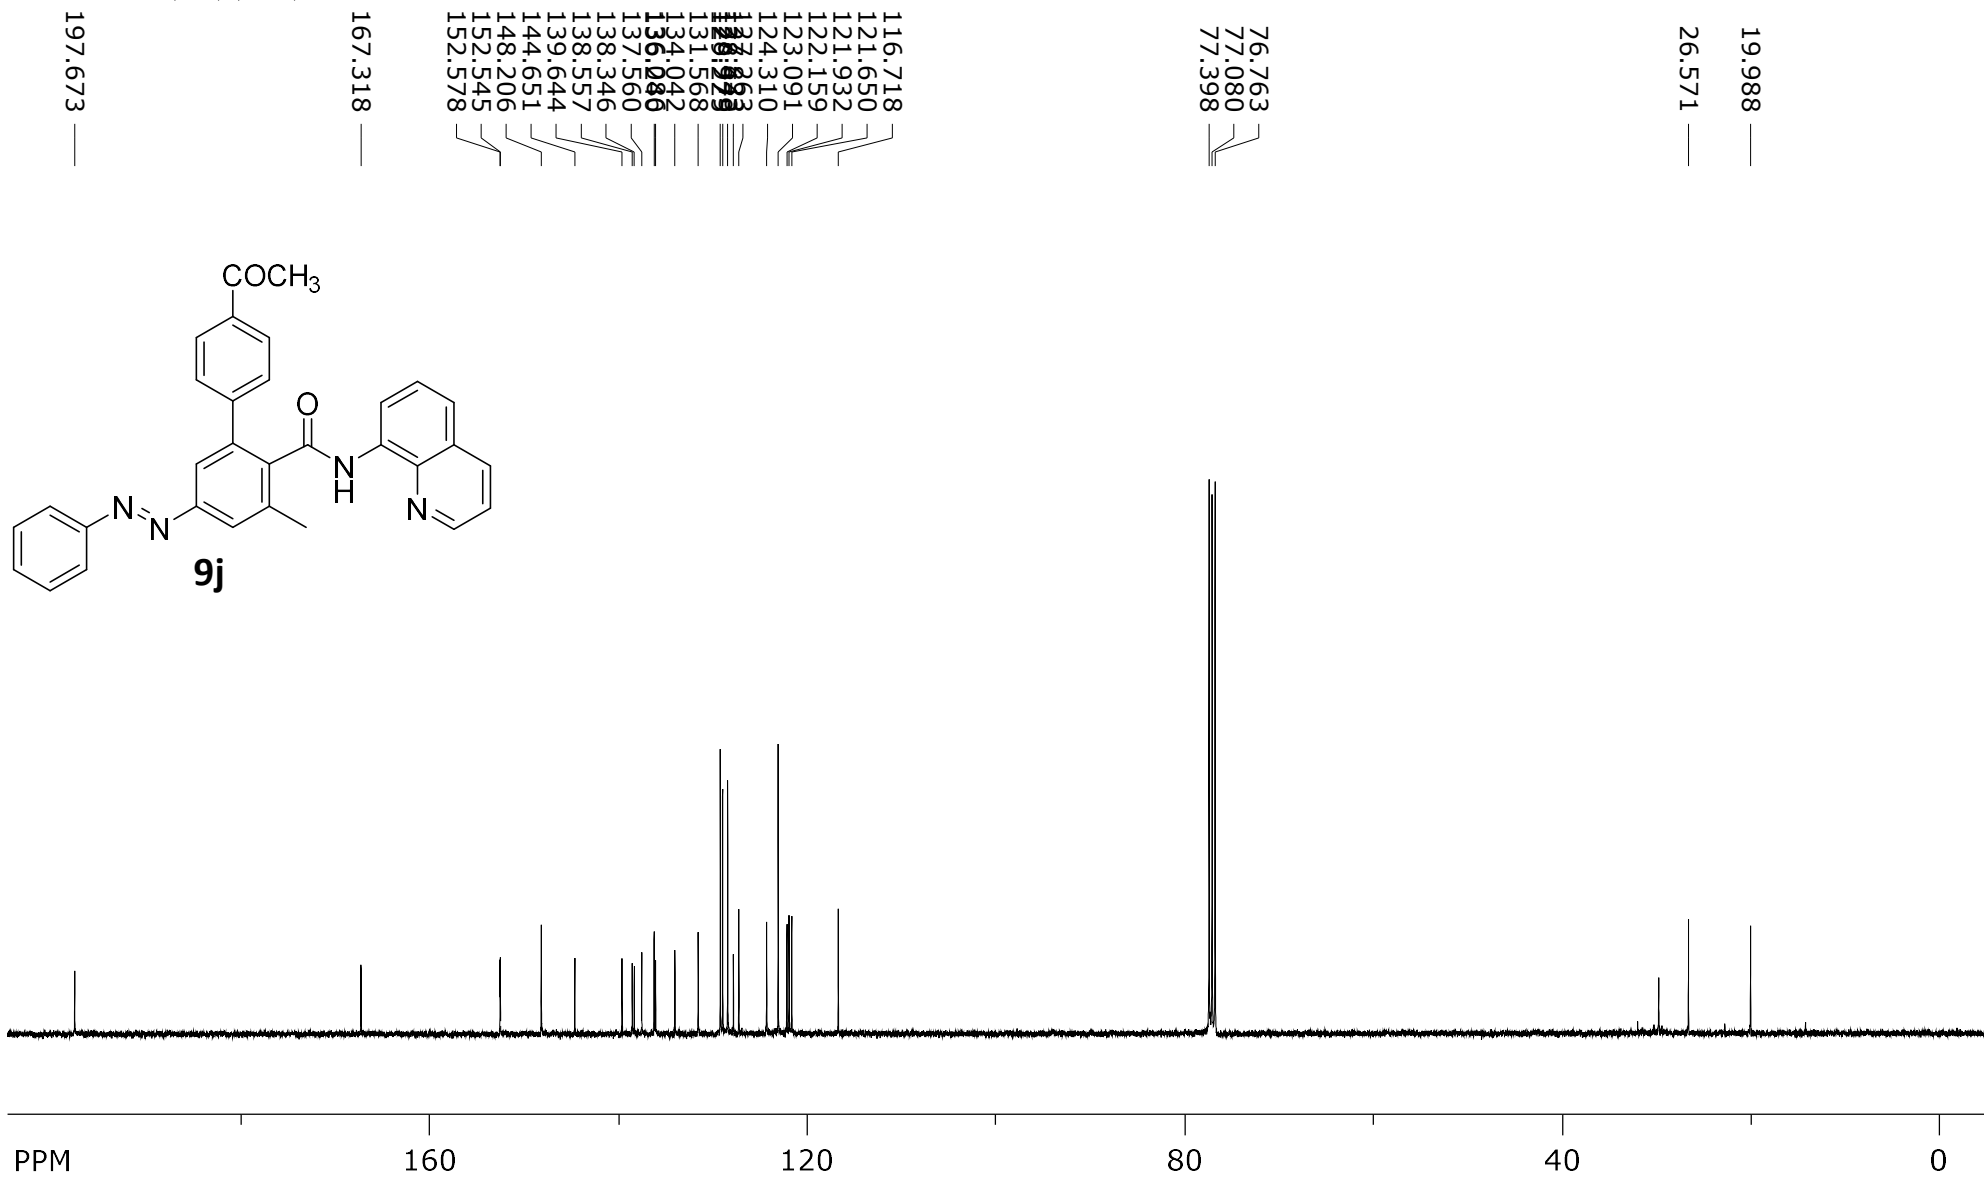

SpinWorks 4: RP\_1188\_FIN1  
C13CPD CDCI3 /opt/topspin3.5pl2/nmrdata nmrsu 4

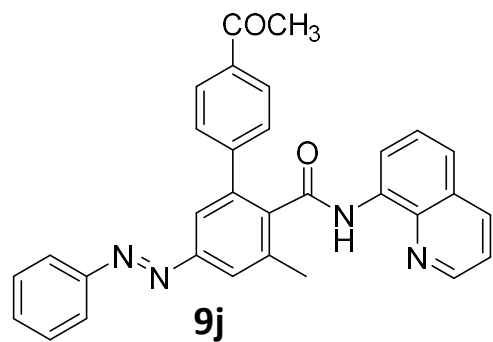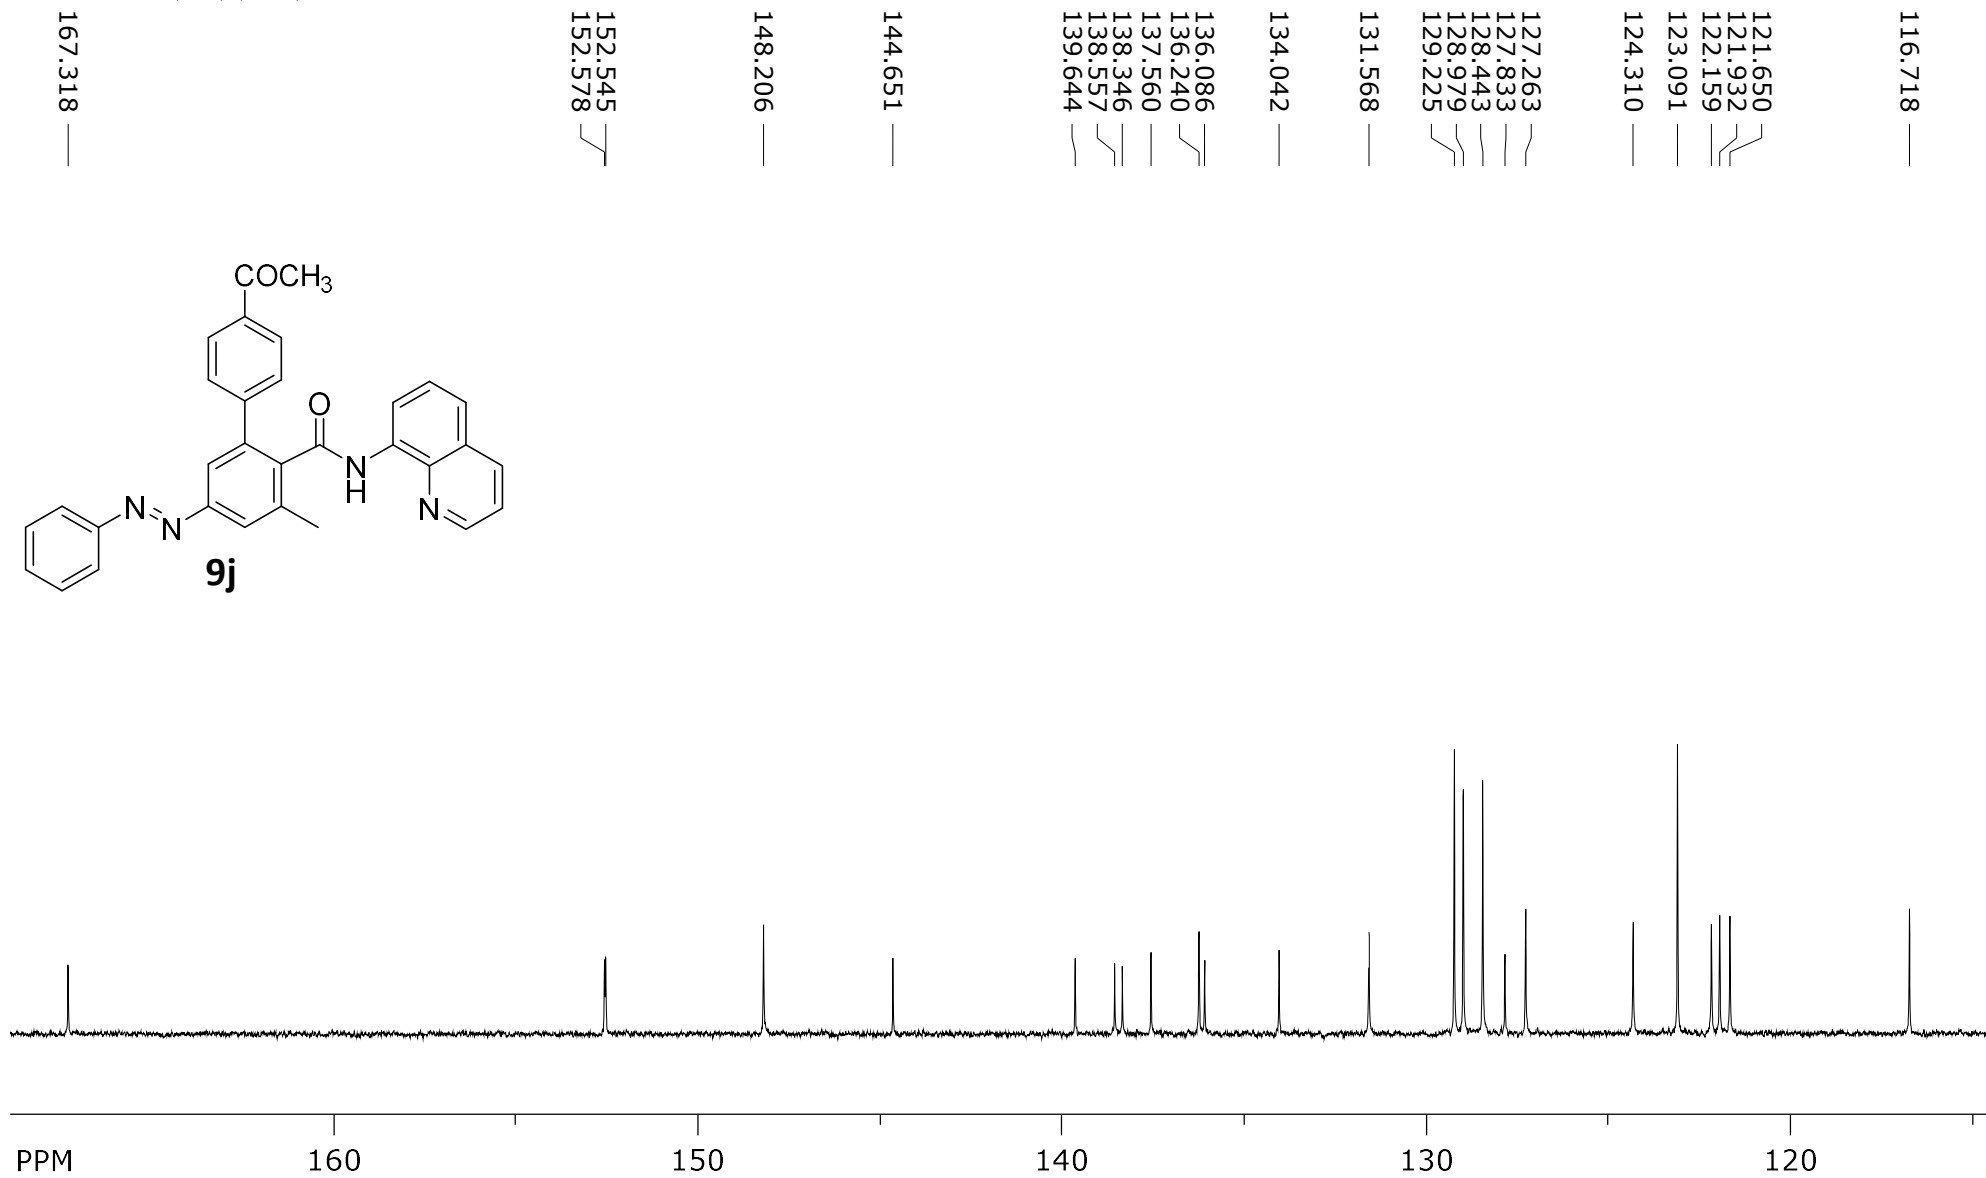

SpinWorks 4: RP 1184 B2  
PROTON CDCl3 /opt/topspin3.5pl2/nmrdata nmrsu 5

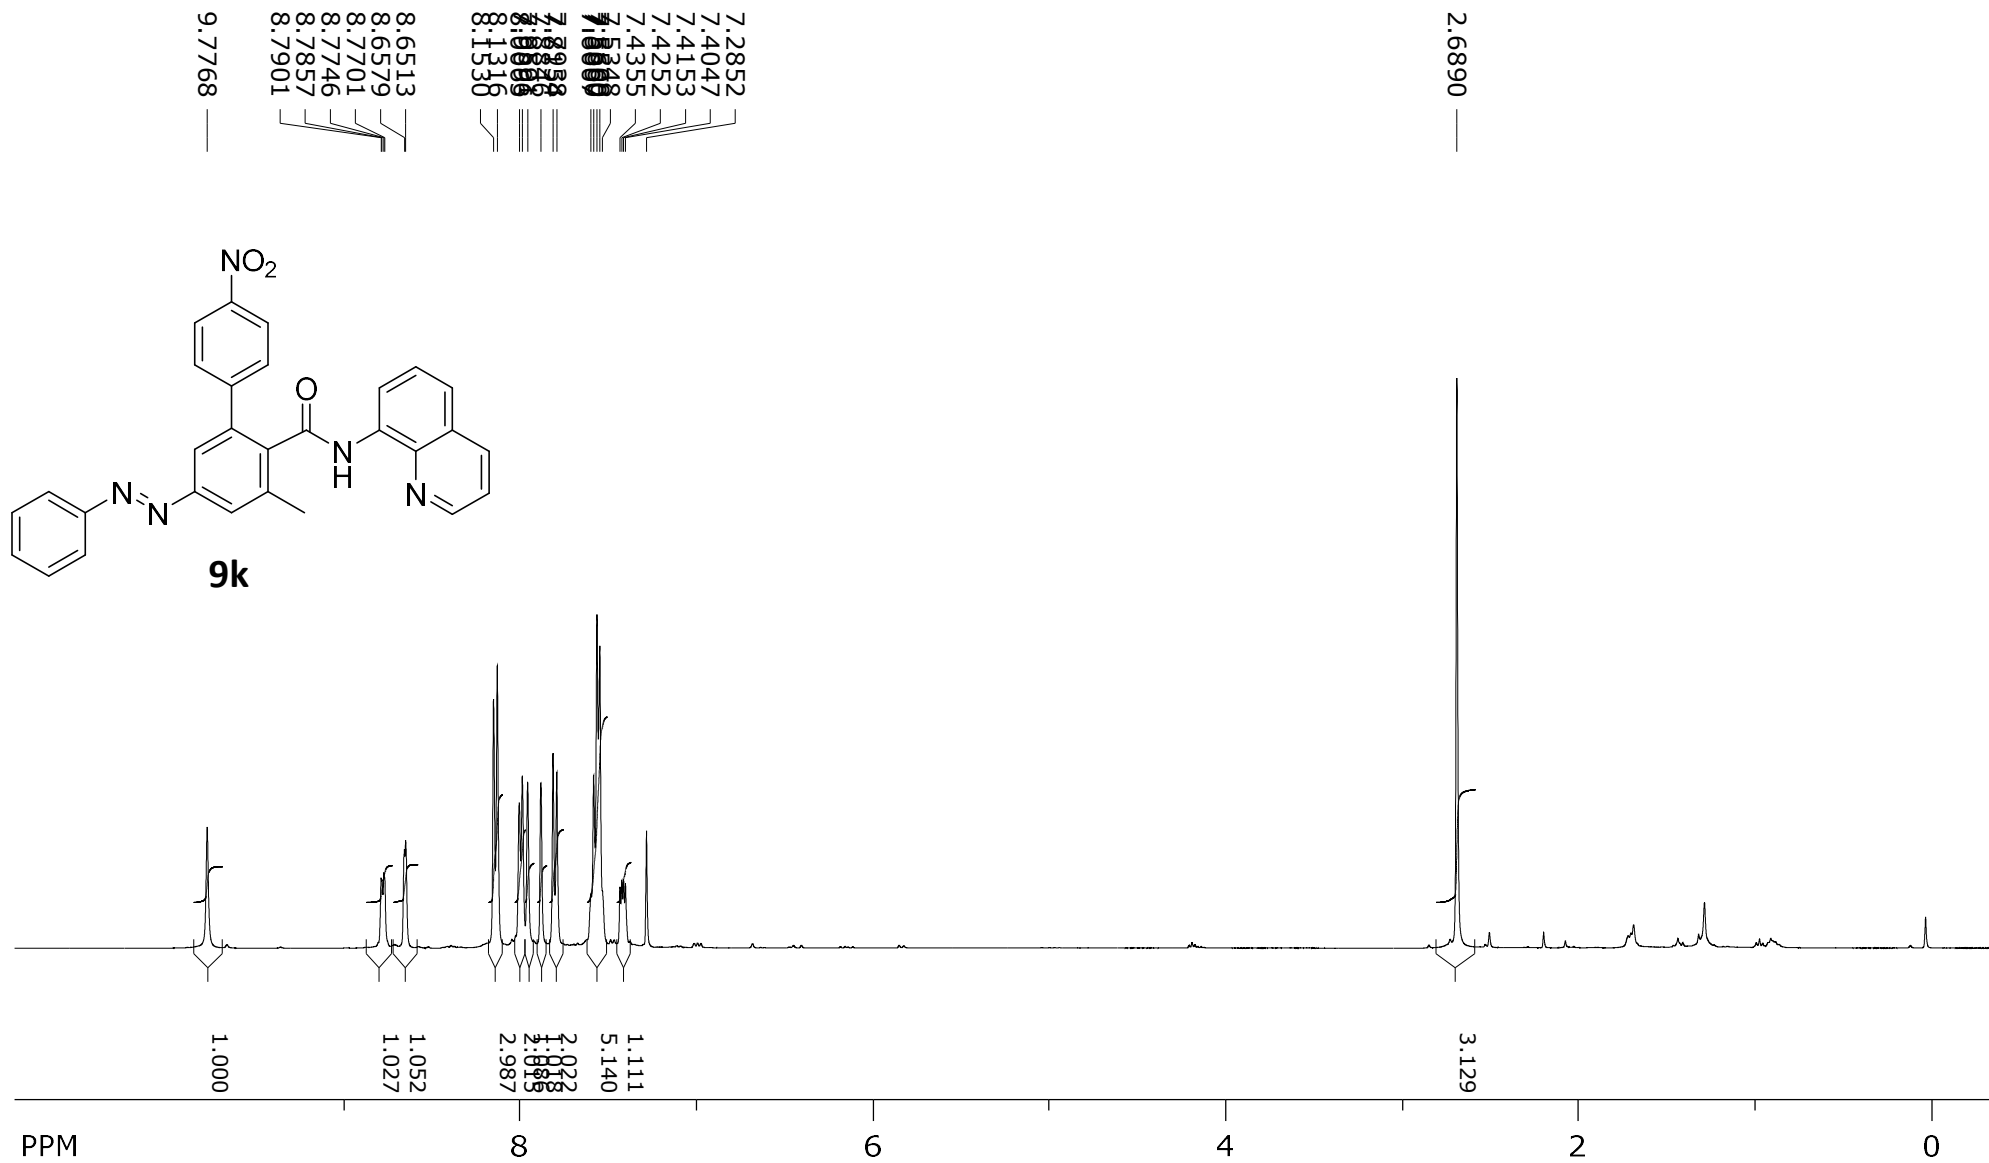

SpinWorks 4: RP 1184 B2  
PROTON CDCl3 /opt/topspin3.5pl2/nmrdata nmrsu 5

8.7701  
8.7746  
8.7857  
8.7901

8.6513  
8.6579

8.1316  
8.1530

7.9591  
7.9896  
8.0063

7.8846

7.7938  
7.8154

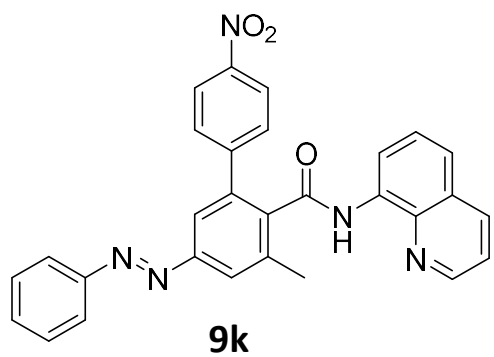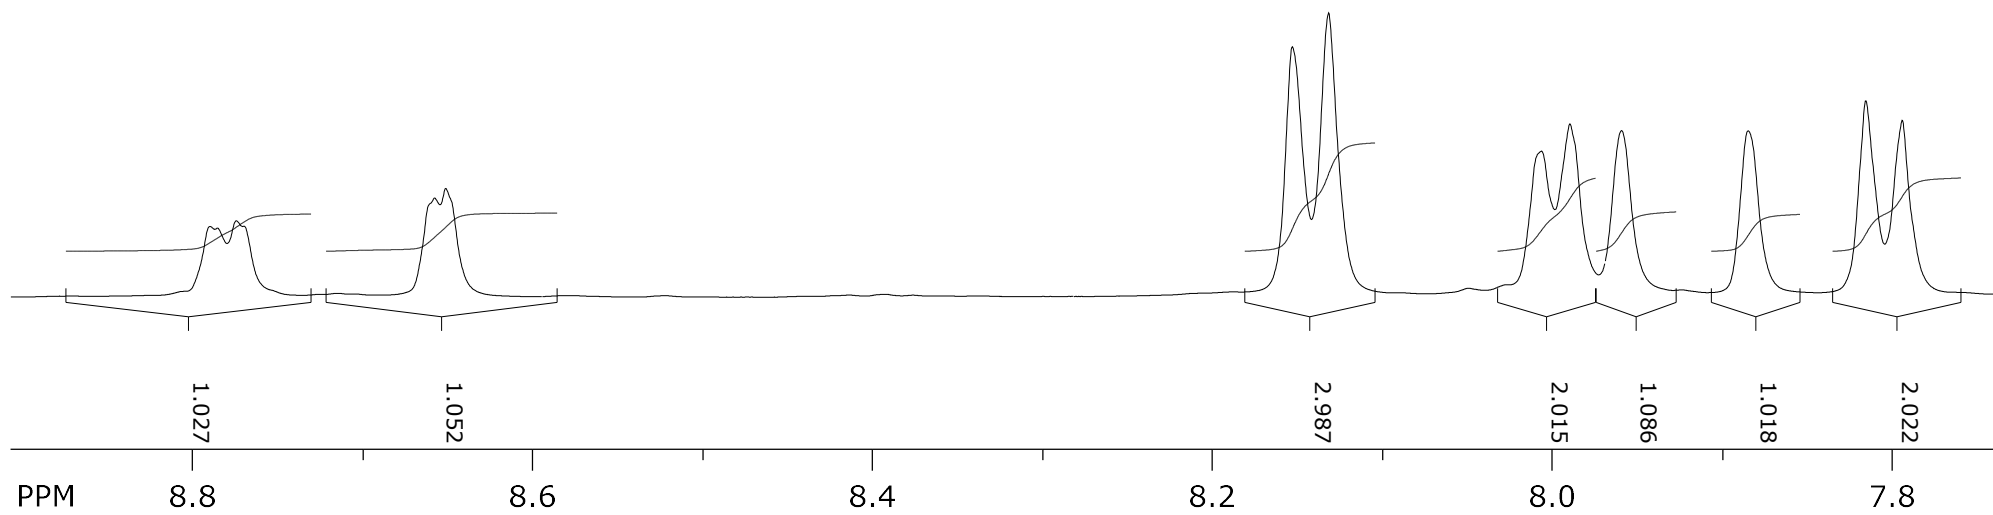

SpinWorks 4: RP 1184 B2  
PROTON CDCl3 /opt/topspin3.5pl2/nmrdata nmrsu 5

7.6007 —  
7.5850 —  
7.5660 —  
7.5500 —  
7.5348 —  
7.4355 —  
7.4252 —  
7.4153 —  
7.4047 —  
7.2852 —

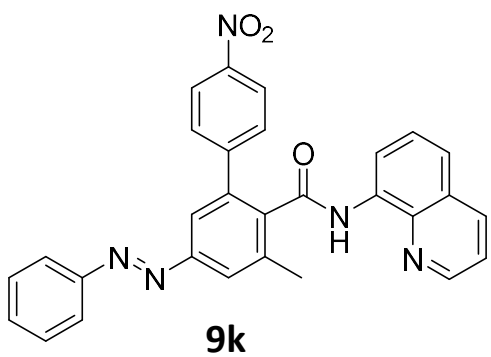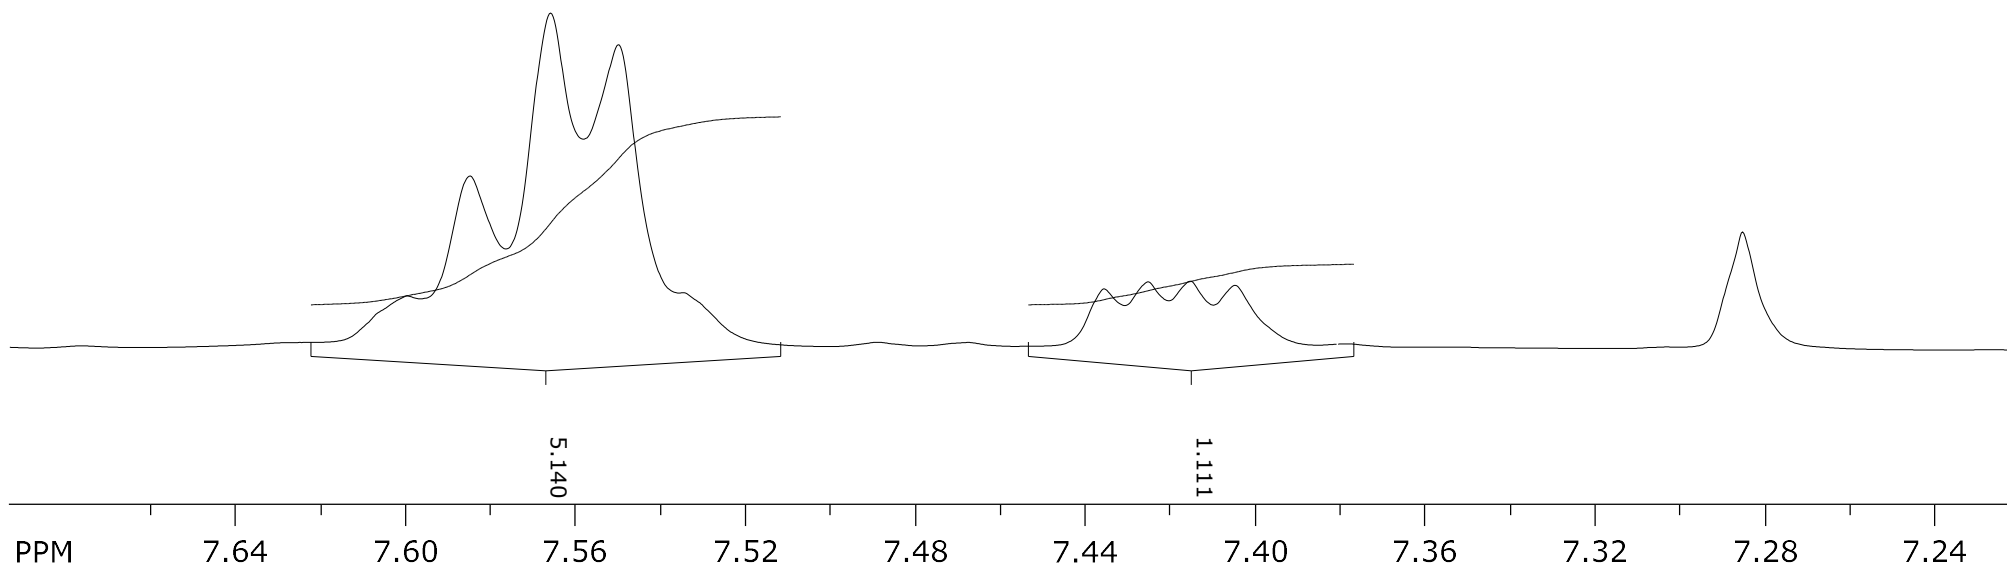

SpinWorks 4: RP 1184 B2  
C13CPD CDCl3 /opt/topspin3.5pl2/nmrdata nmrsu 5

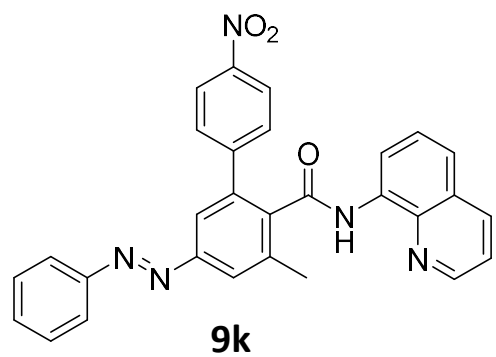

166.916 —  
152.562  
152.519  
148.265  
147.286  
146.539  
138.484  
138.455  
138.300  
139.829  
139.829  
131.730  
131.730  
129.851  
129.851  
123.133  
123.133  
122.442  
121.761  
121.624  
116.801

76.759  
77.077  
77.393

19.980 —

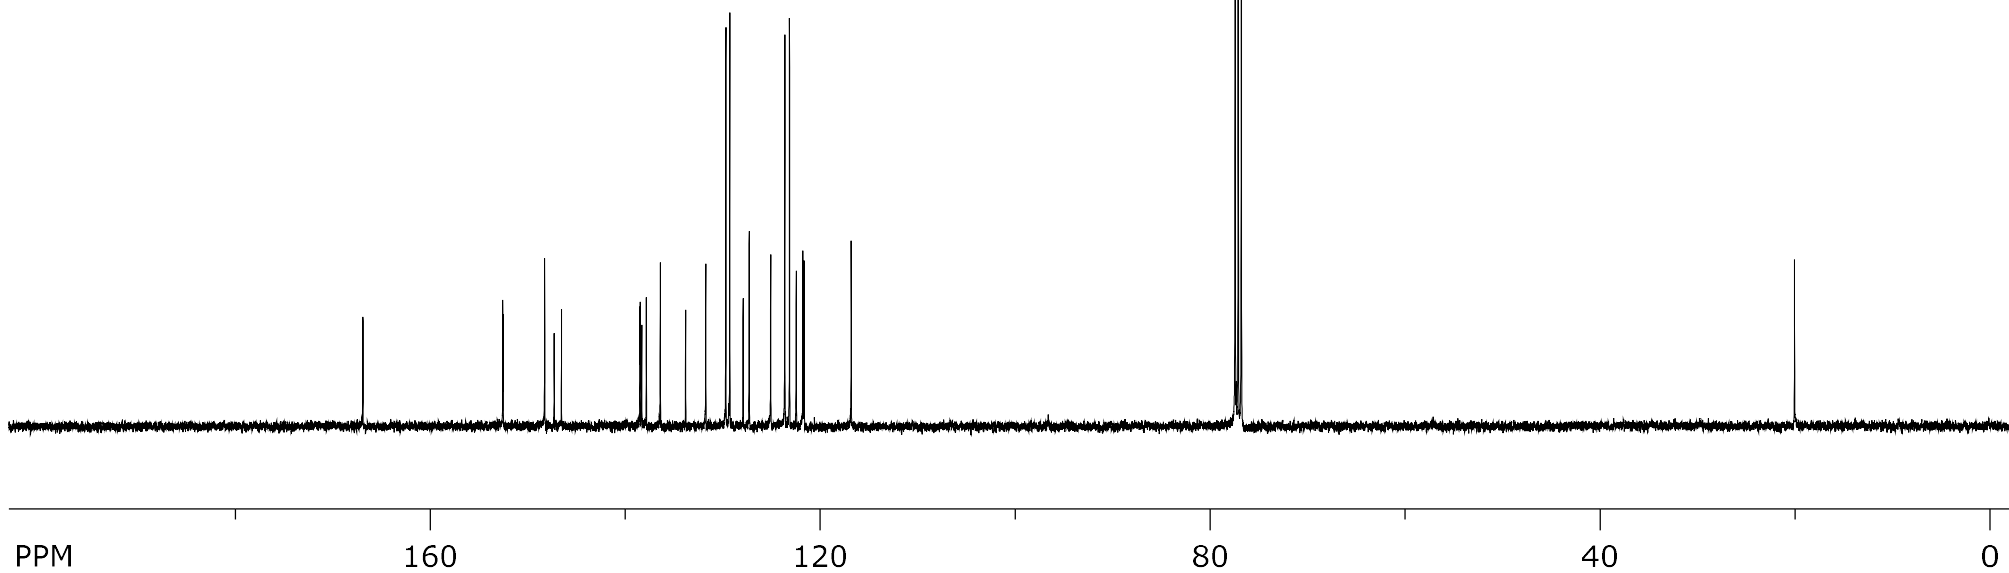

SpinWorks 4: RP 1184 B2  
C13CPD CDCl3 /opt/topspin3.5pl2/nmrdata nmrsu 5

152.519  
152.562  
146.539  
147.286  
148.265  
137.829  
138.300  
138.455  
138.484  
136.389  
133.798  
131.730  
129.263  
129.671  
127.272  
127.891  
125.065  
123.617  
123.133  
122.442  
121.761  
121.624  
116.801

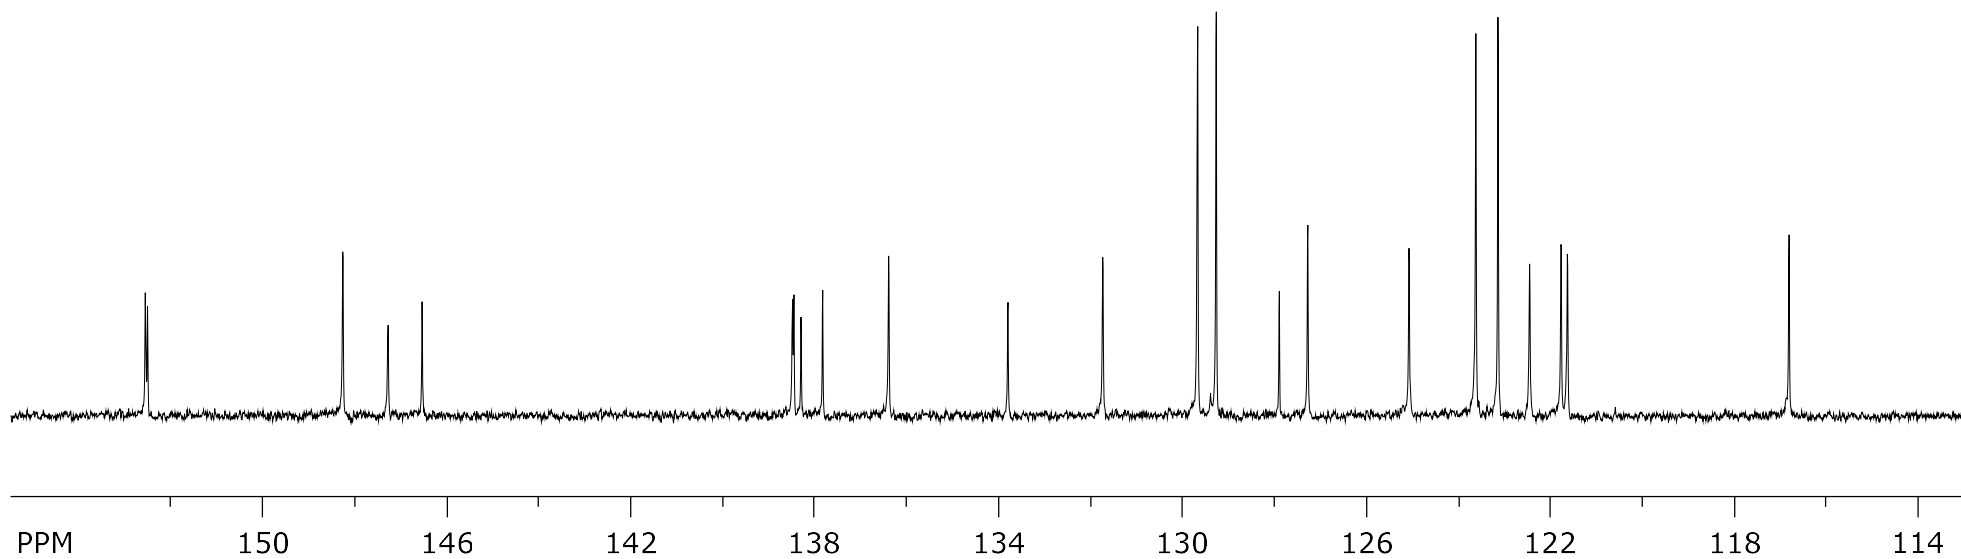

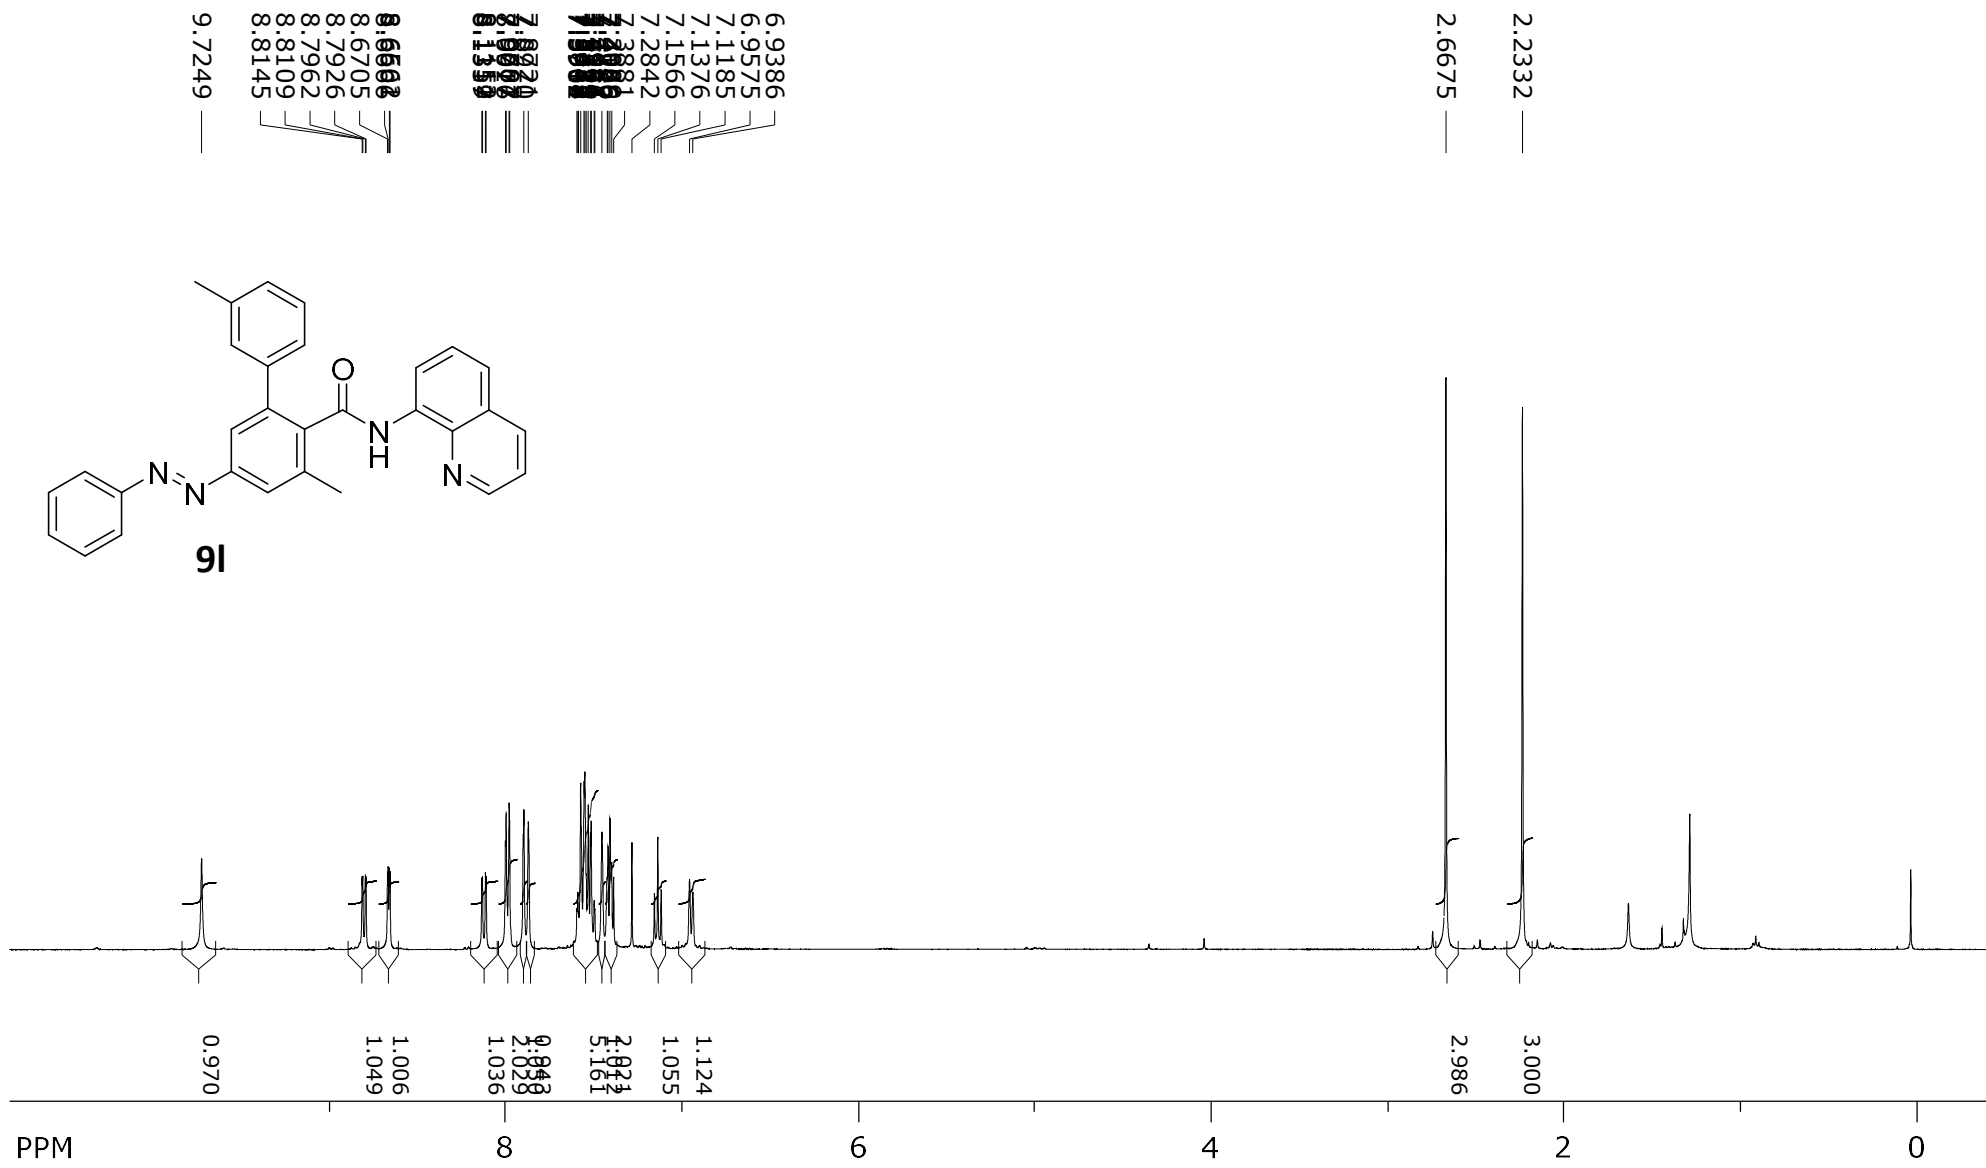



7.8721  
7.8970

7.9781  
7.9807  
7.9977  
8.0016

8.1112  
8.1151  
8.1319  
8.1357

8.6562  
8.6601  
8.6666  
8.6705

8.7926  
8.7962  
8.8109  
8.8145

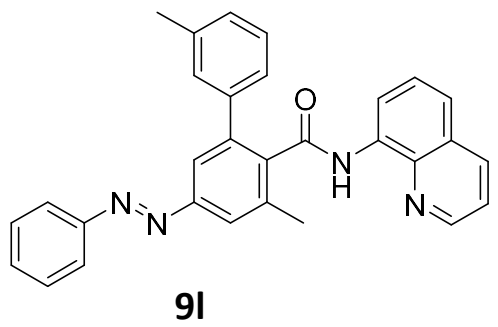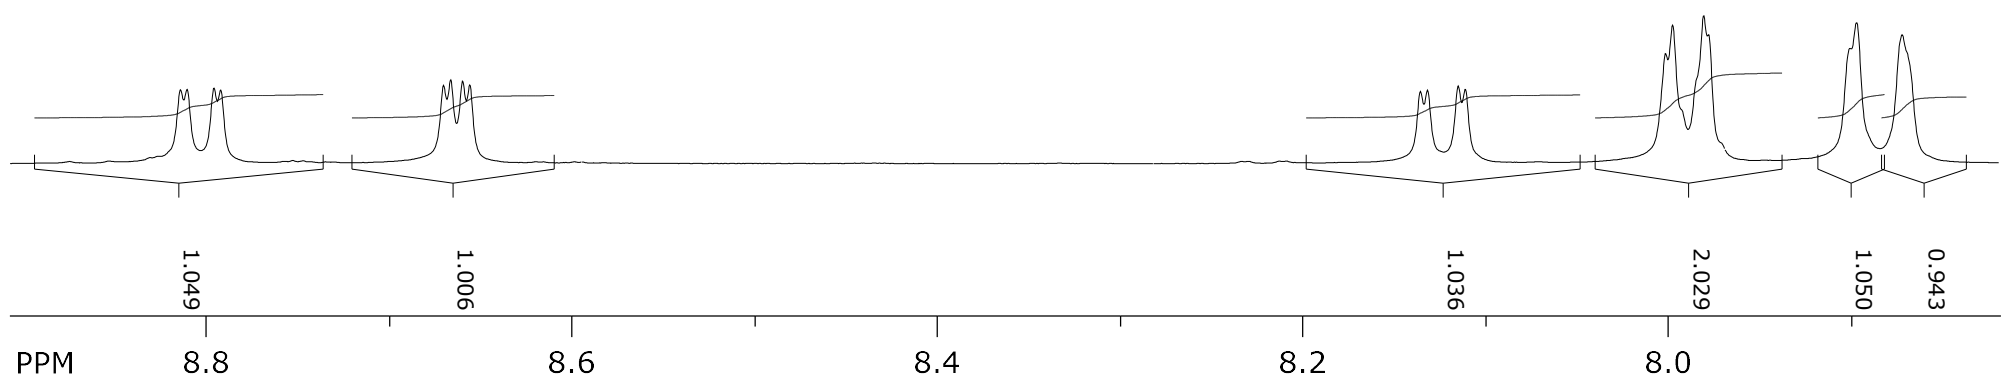

SpinWorks 4: RP-1192A1+A3

7.4946  
7.4984  
7.5154  
7.5191  
7.5319  
7.5438  
7.5511  
7.5555  
7.5748  
7.5868  
7.5914  
7.5962

7.4542 —

7.3881  
7.3989  
7.4086  
7.4196  
7.4246

7.2842 —

7.1185 —  
7.1376 —  
7.1566 —

6.9386 —  
6.9575 —

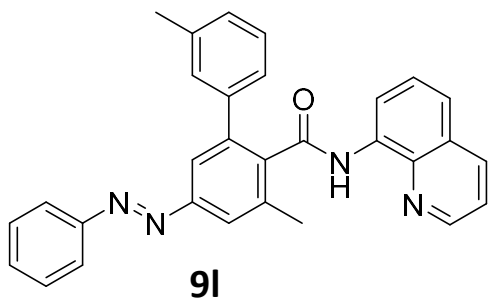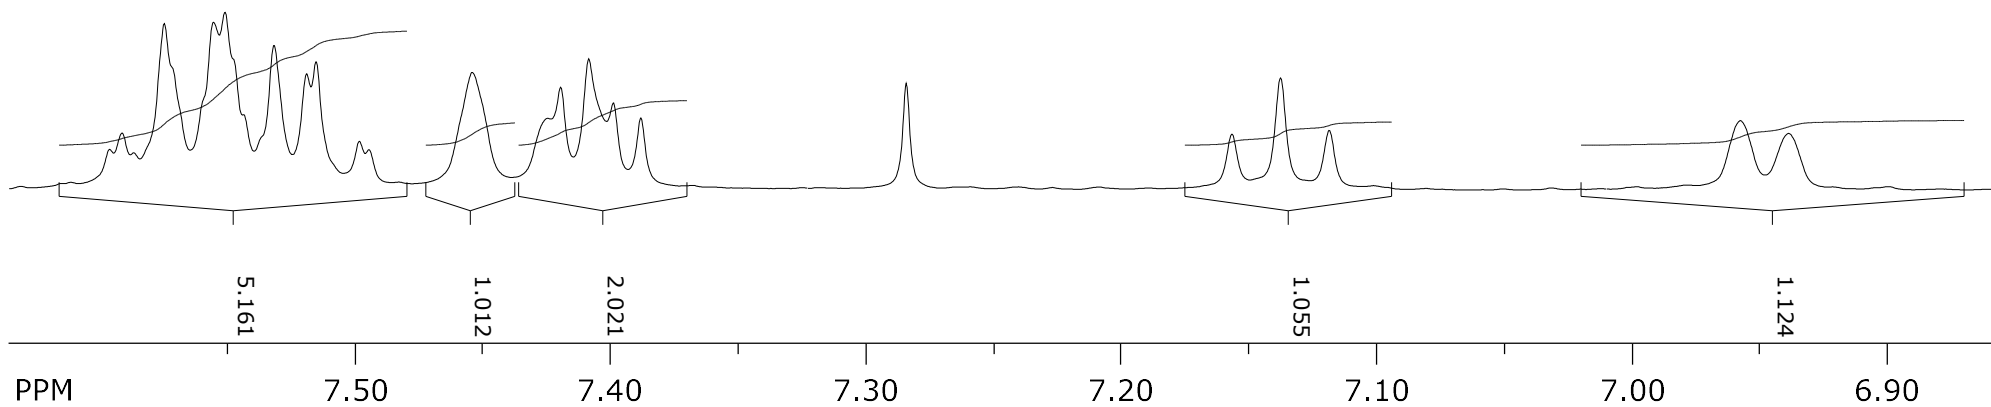

SpinWorks 4: RP 1192 A1 A3  
C13CPD CDCl3 /opt/topspin3.5pl2/nmrdata nmrsu 6

167.803  
152.665  
148.058  
141.045  
139.743  
138.732  
138.402  
137.908  
136.334  
134.353  
131.389  
129.919  
129.809  
127.729  
123.459  
122.224  
121.856  
121.532  
116.543

76.793  
77.110  
77.428

20.027  
21.328

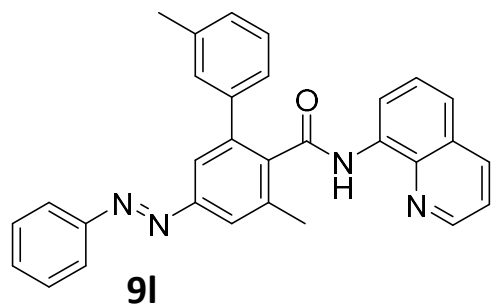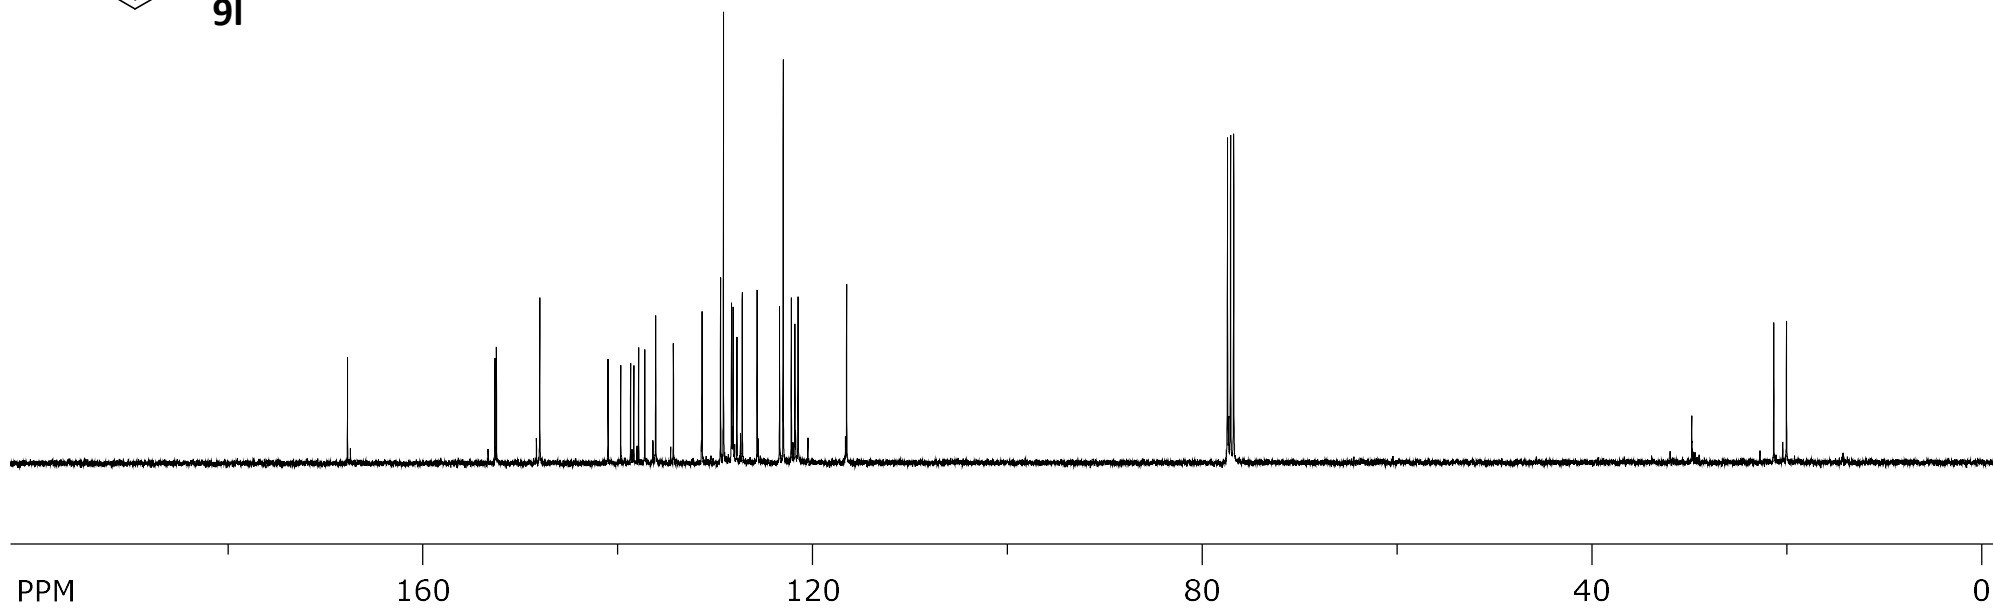

SpinWorks 4: RP 1192 A1 A3  
C13CPD CDCl3 /opt/topspin3.5pl2/nmrdata nmrsu 6

152.505  
152.665

148.058

141.045

139.743

138.732

138.402

137.906

137.270

136.152

134.334

131.389

129.492

129.195

128.371

128.200

127.809

125.736

123.429

123.056

122.224

121.856

121.532

116.543

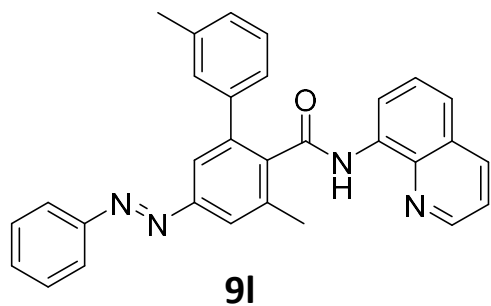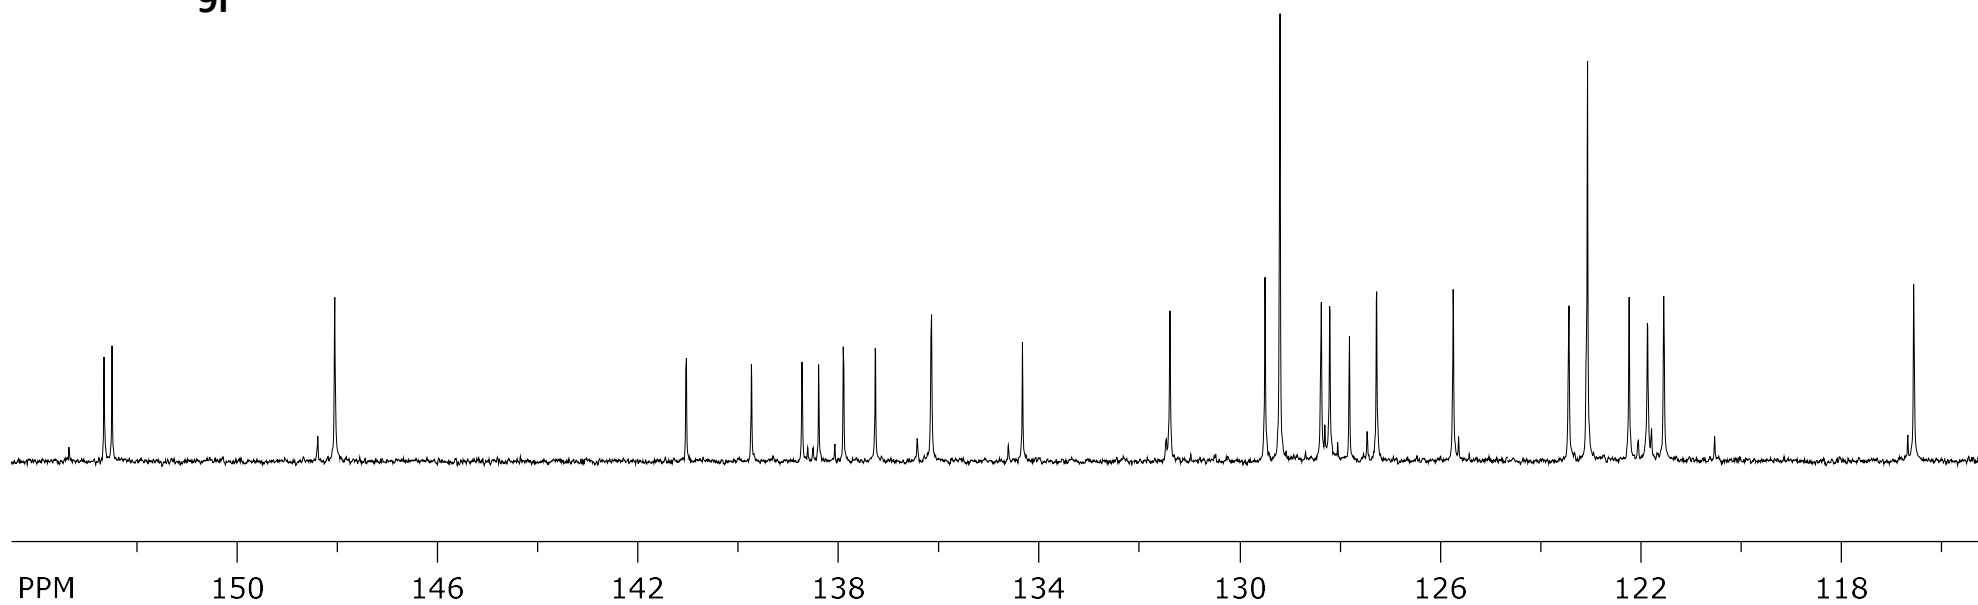

SpinWorks 4: RP 120 9 A2  
PROTON CDCl3 /opt/topspin3.5pl2/nmrdata nmrsu 8

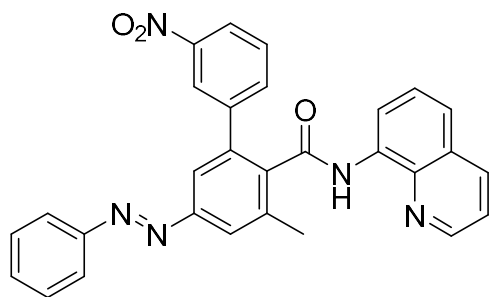

9m

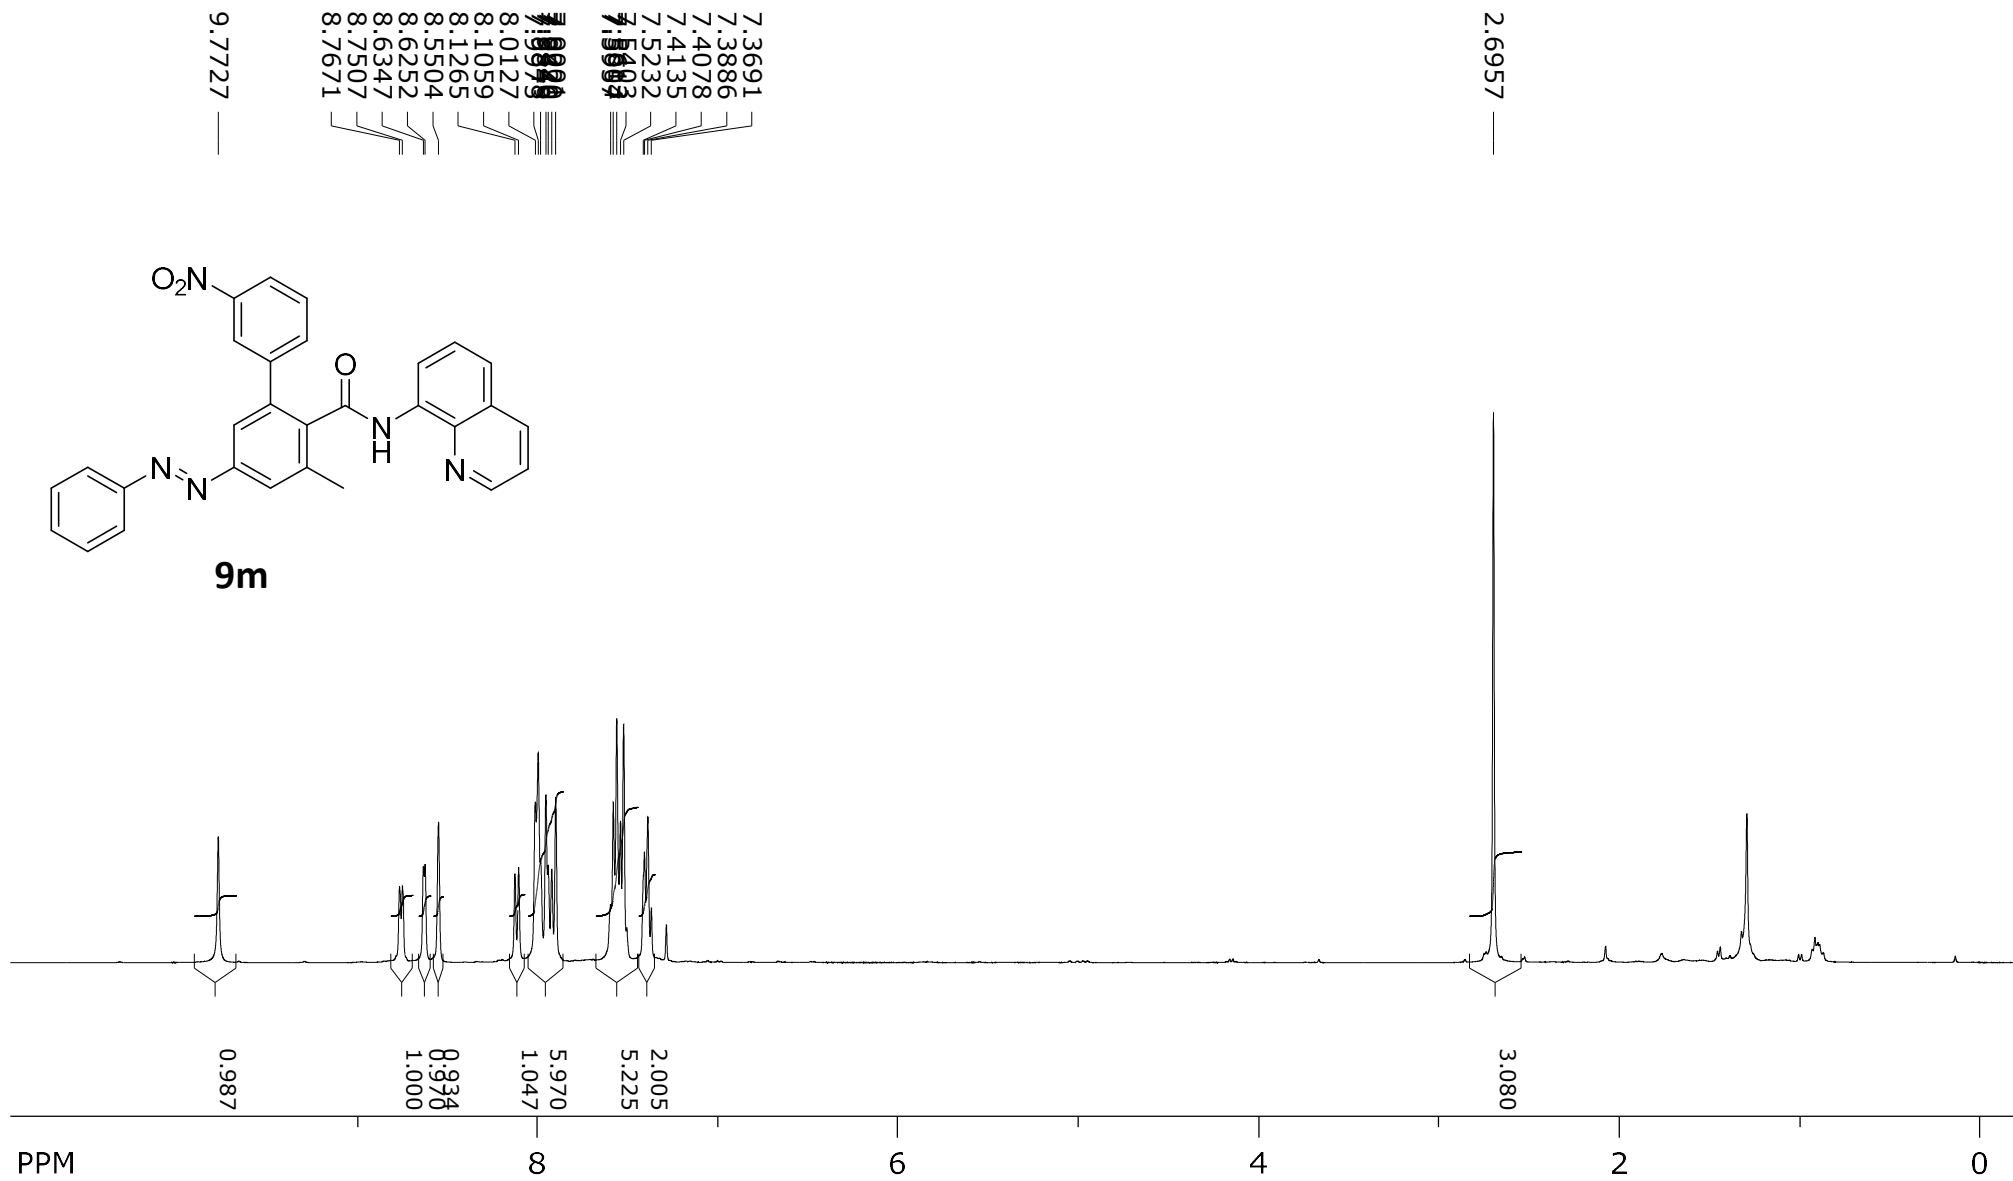

SpinWorks 4: RP 120 9 A2  
PROTON CDCl3 /opt/topspin3.5pl2/nmrdata nmrsu 8

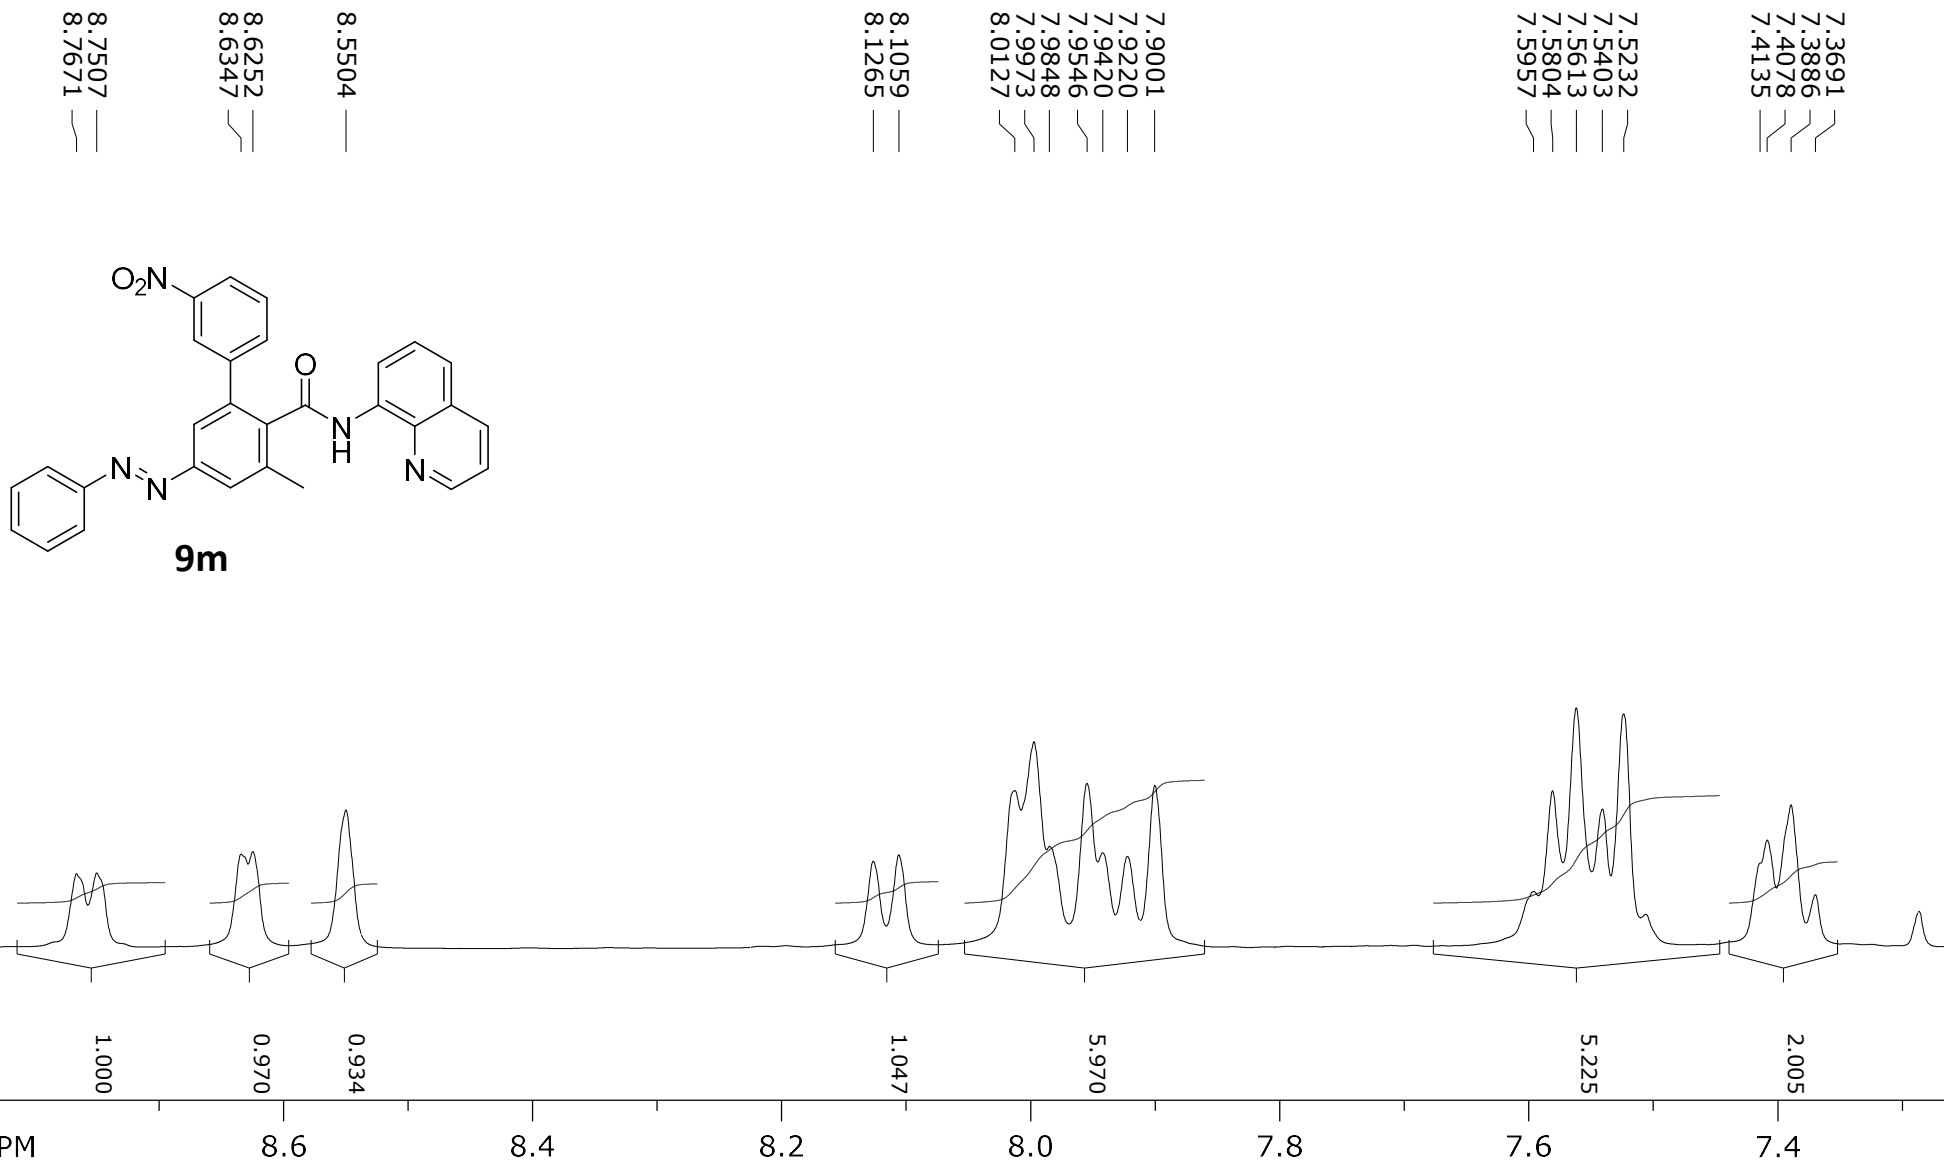

SpinWorks 4: RP 120 9 A2  
C13CPD CDCl3 /opt/topspin3.5pl2/nmrdata nmrsu 8

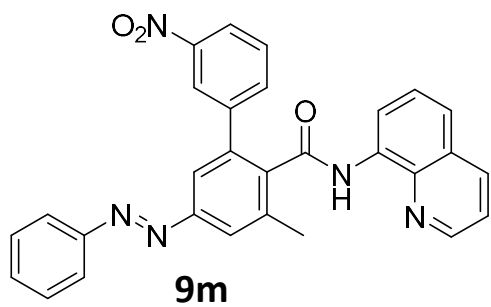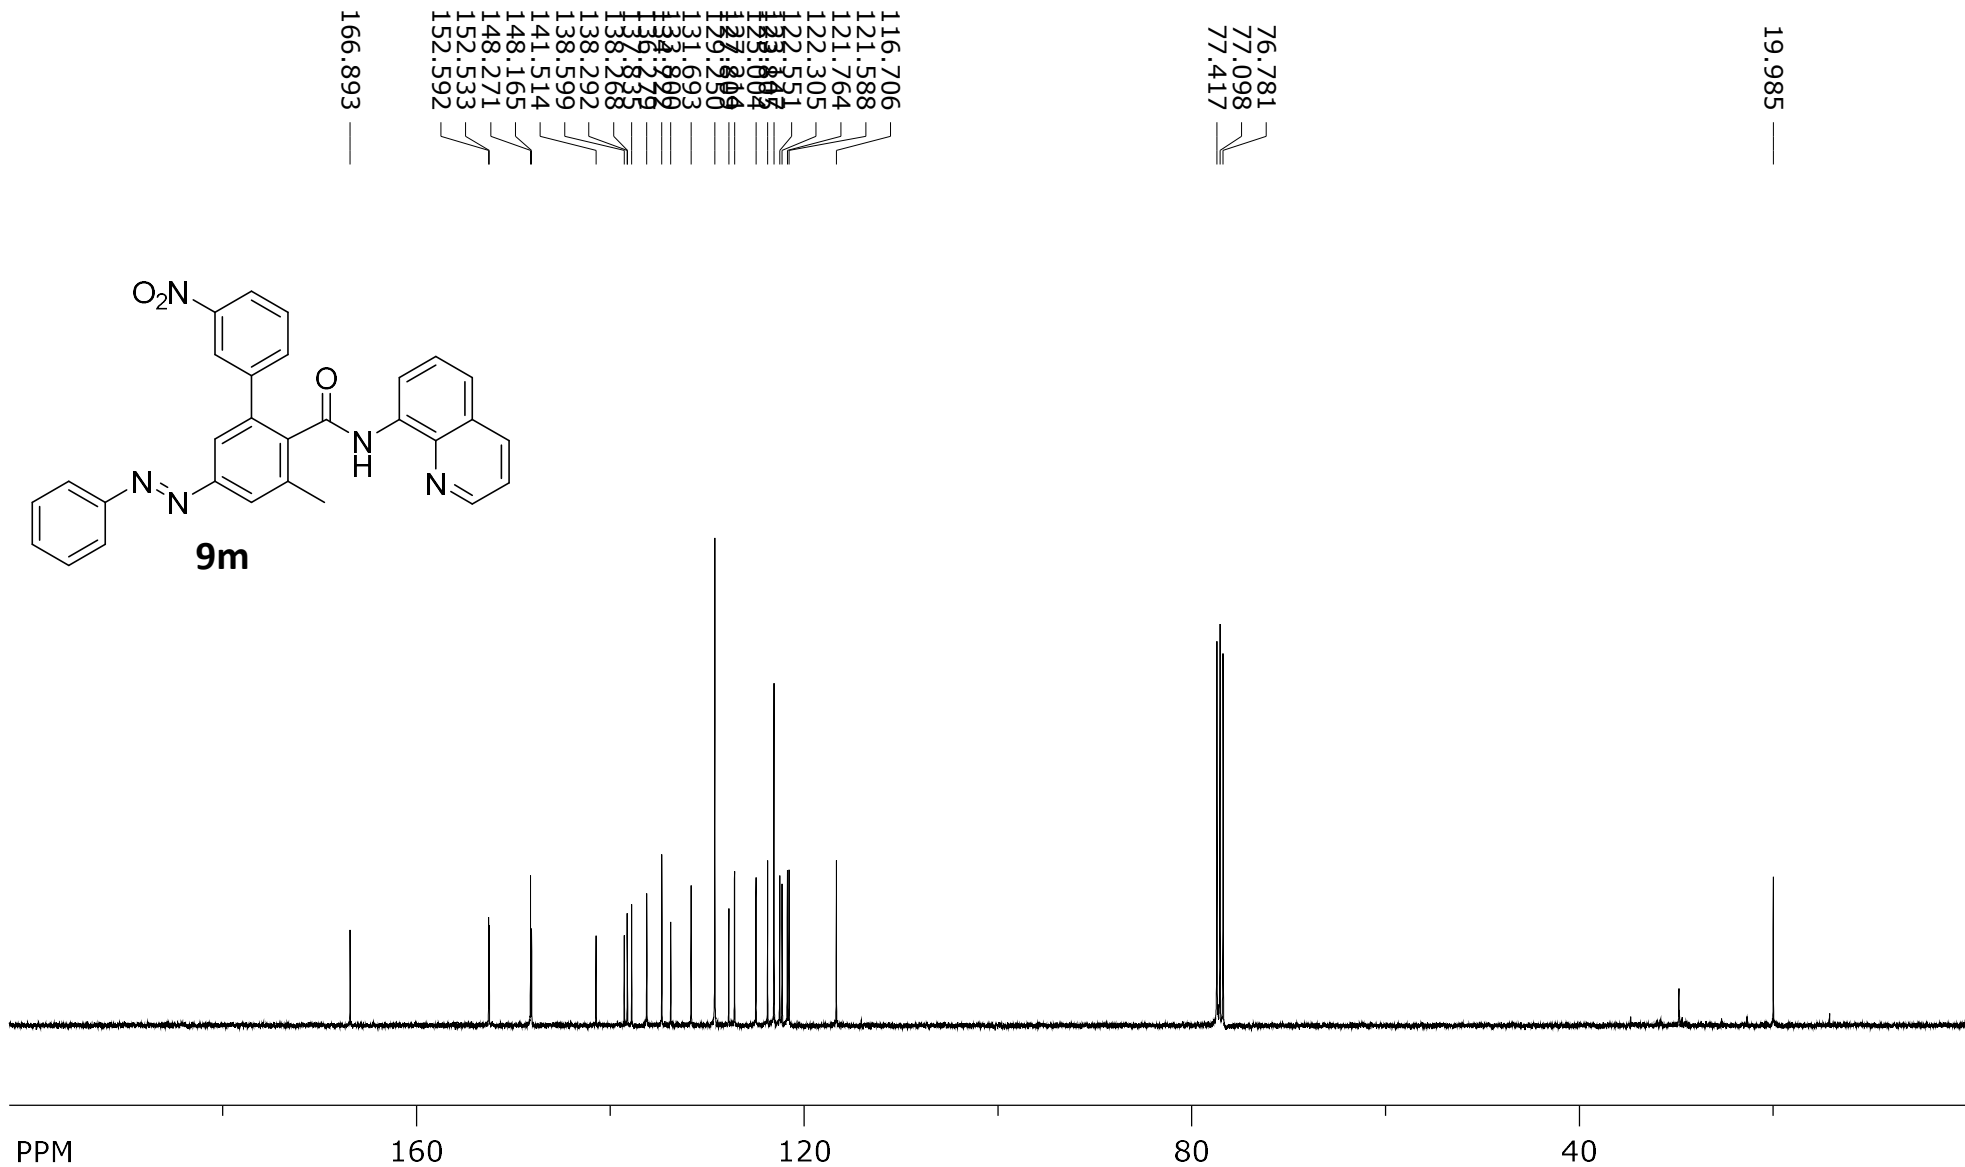

SpinWorks 4: RP 120 9 A2  
C13CPD CDCl3 /opt/topspin3.5pl2/nmrdata nmrsu 8

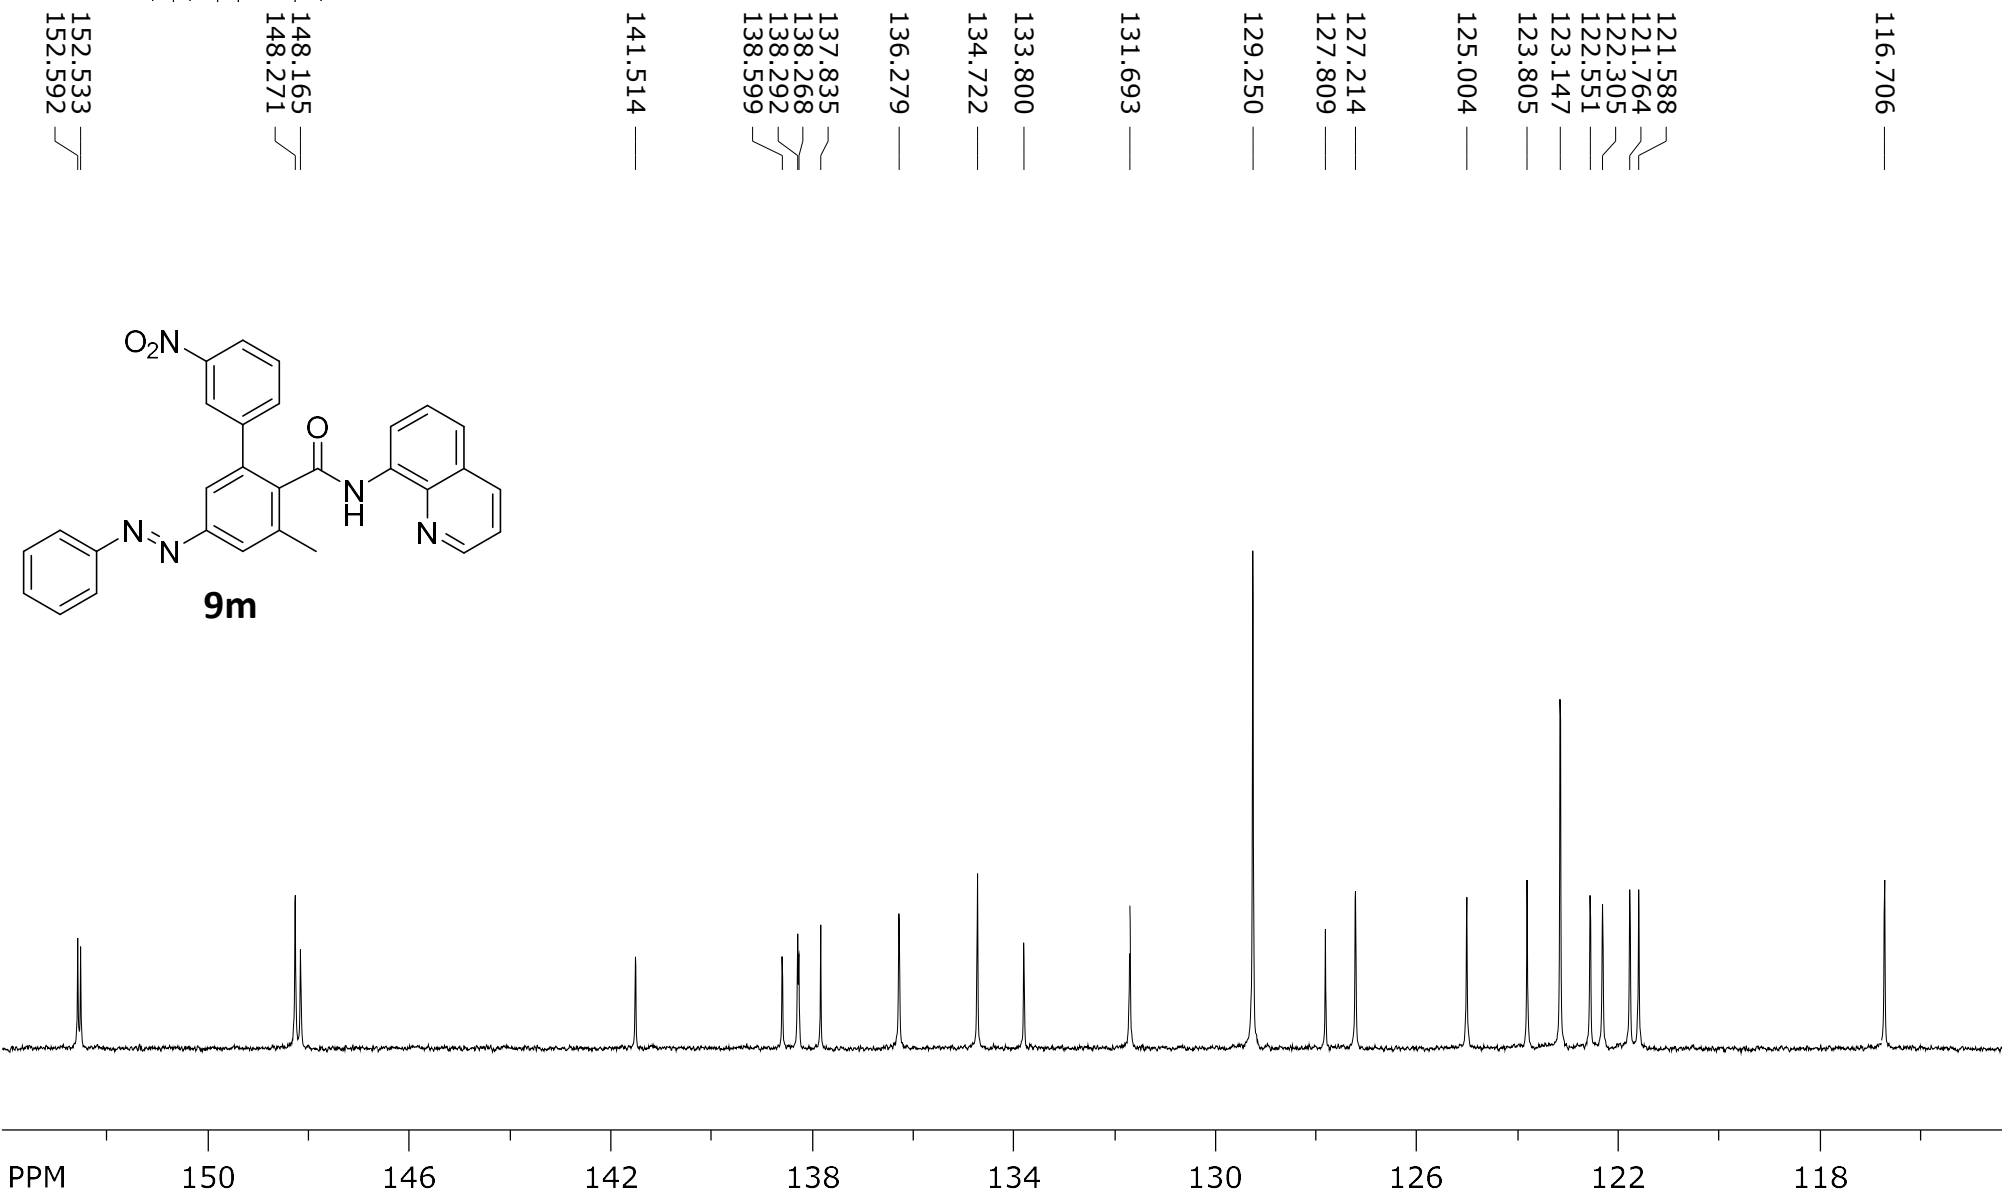





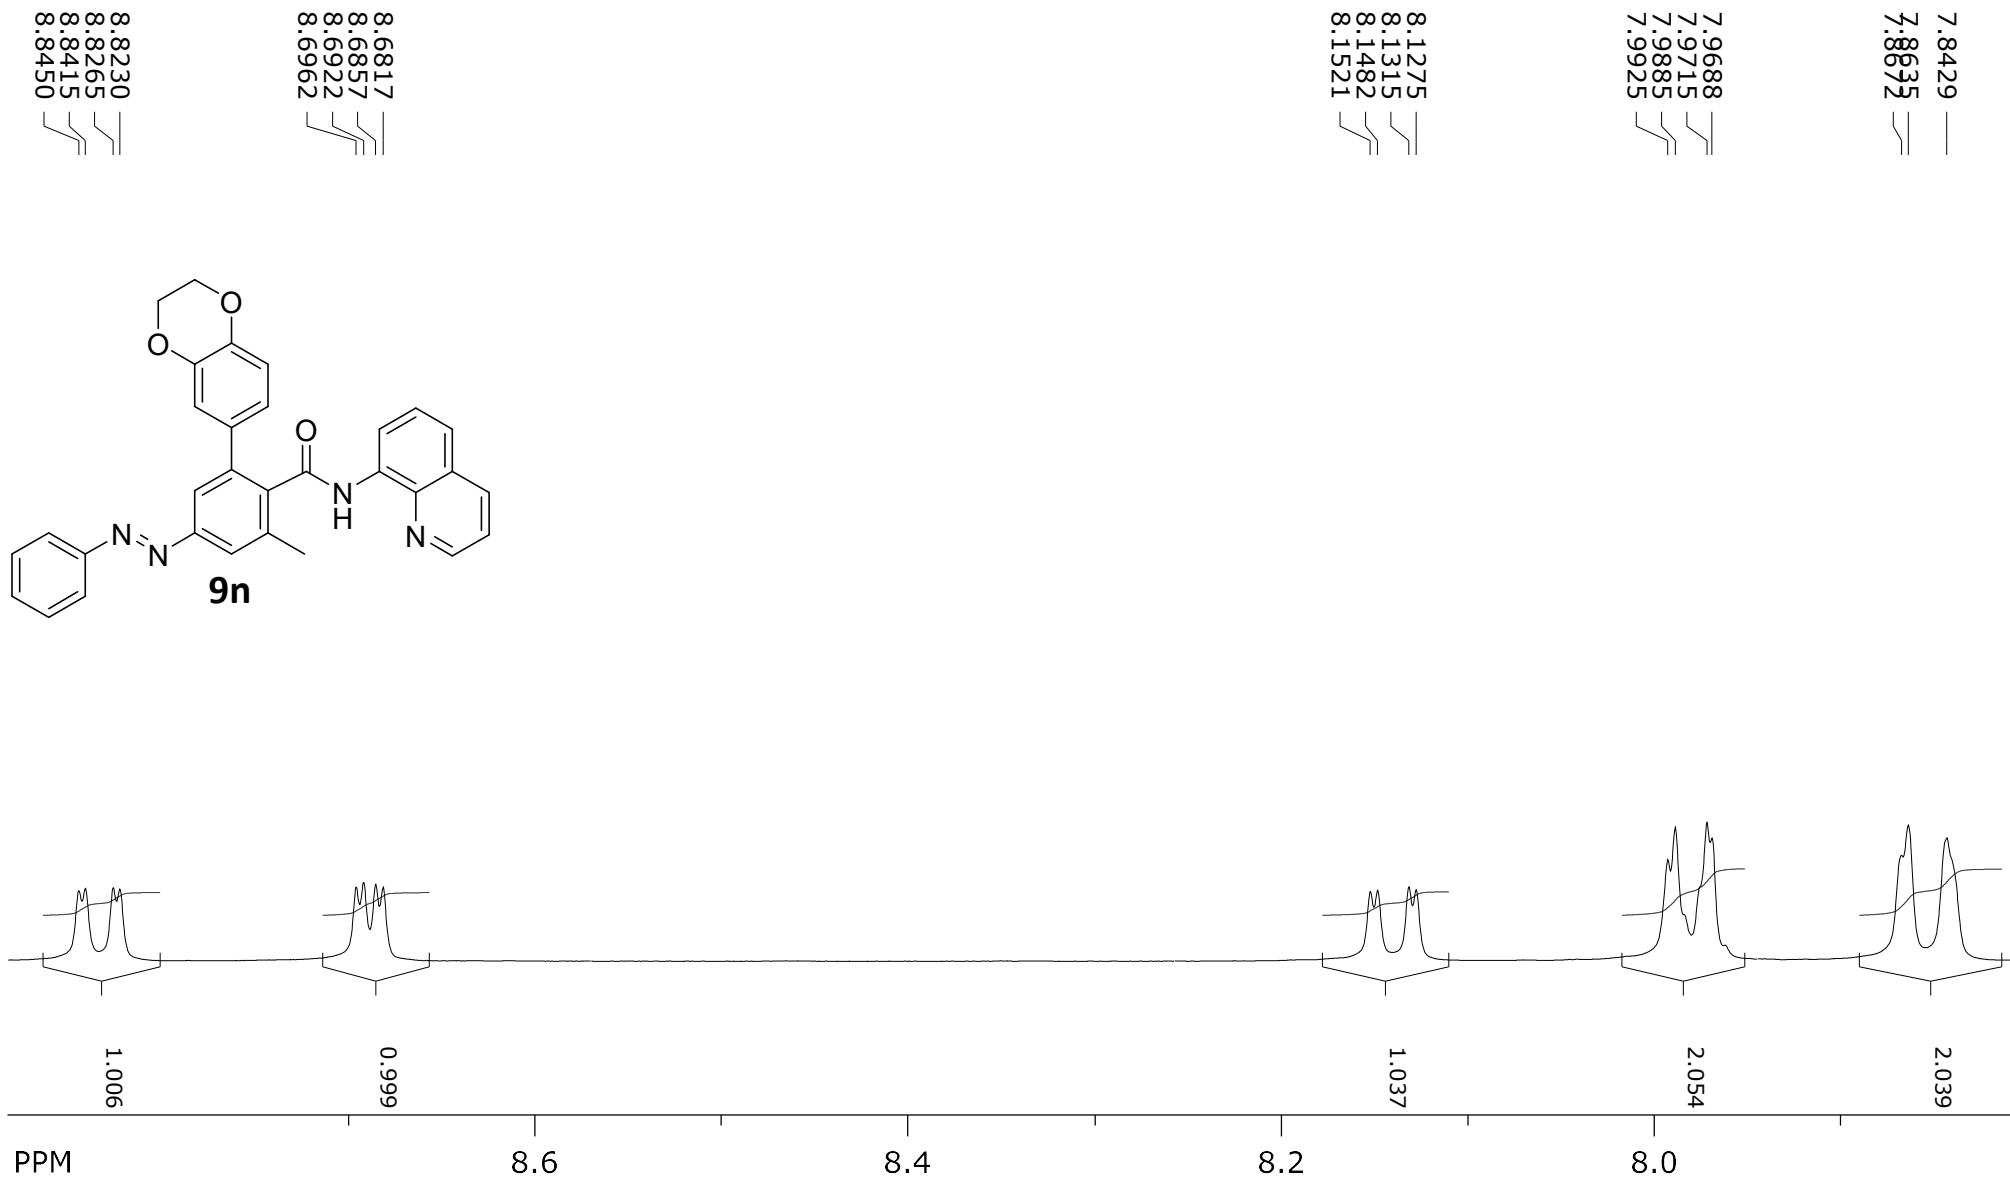

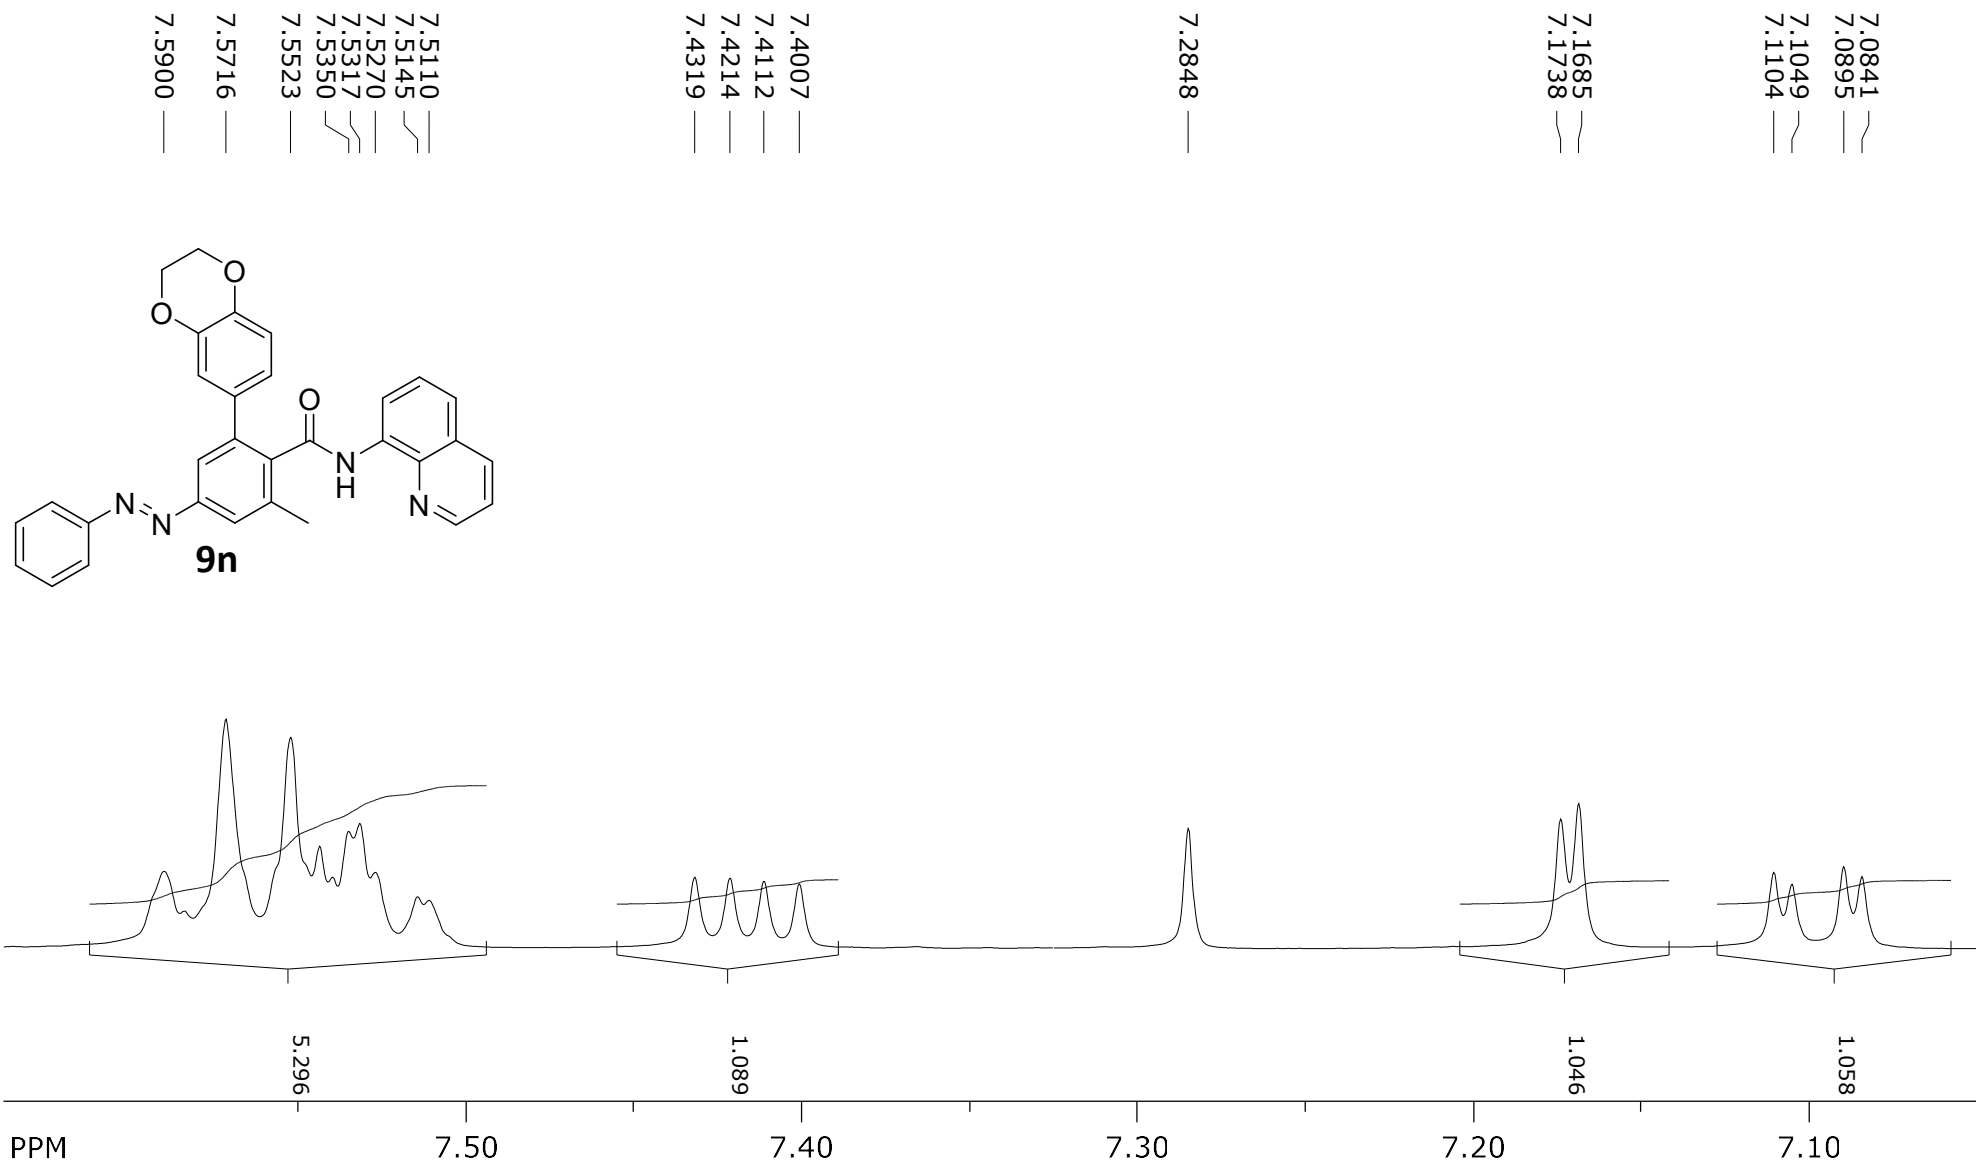

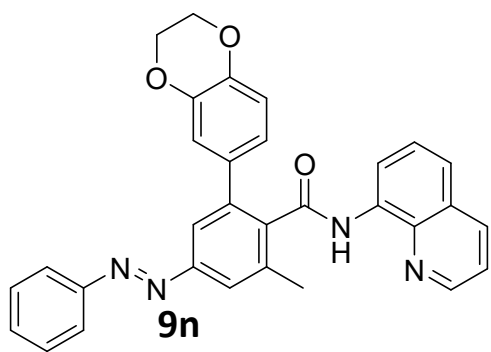

7.5900 —  
7.5716 —  
7.5523 —  
7.5350 —  
7.5317 —  
7.5270 —  
7.5145 —  
7.5110 —  
7.4319 —  
7.4214 —  
7.4112 —  
7.4007 —  
7.2848 —

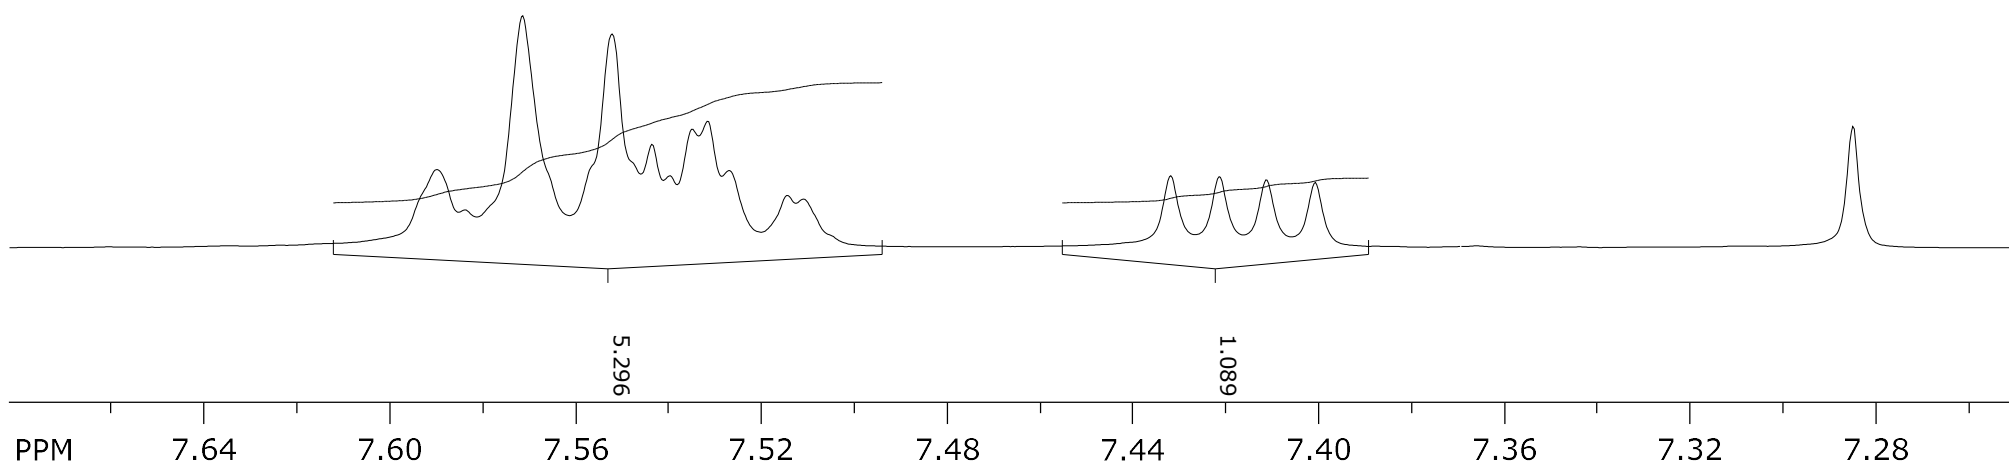

7.1685  
7.1738

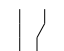

7.0841  
7.0895  
7.1049  
7.1104

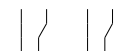

6.7372  
6.7164

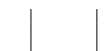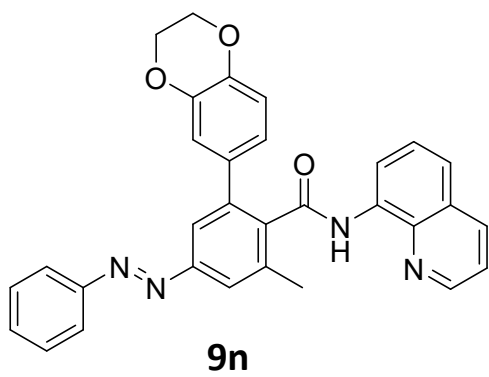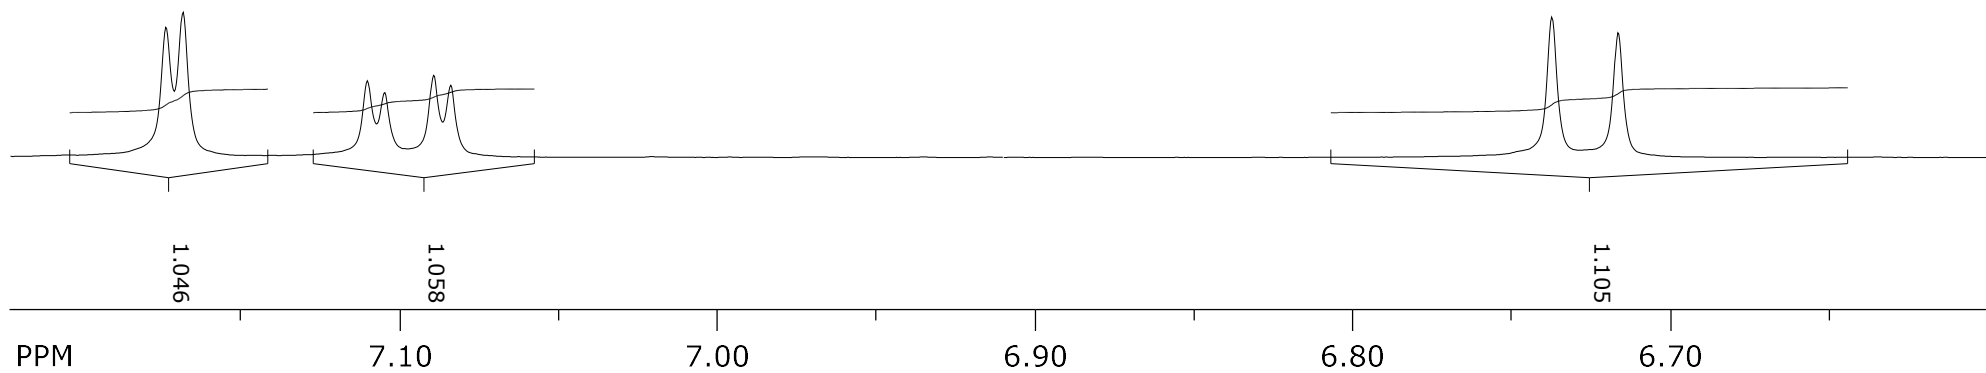

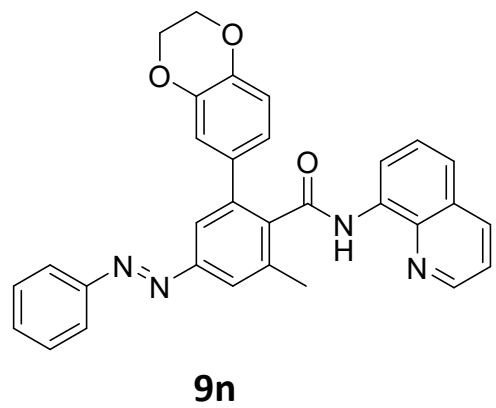

4.0968  
4.1074  
4.1074  
4.1074  
4.1195  
4.1222  
4.1343  
4.1441

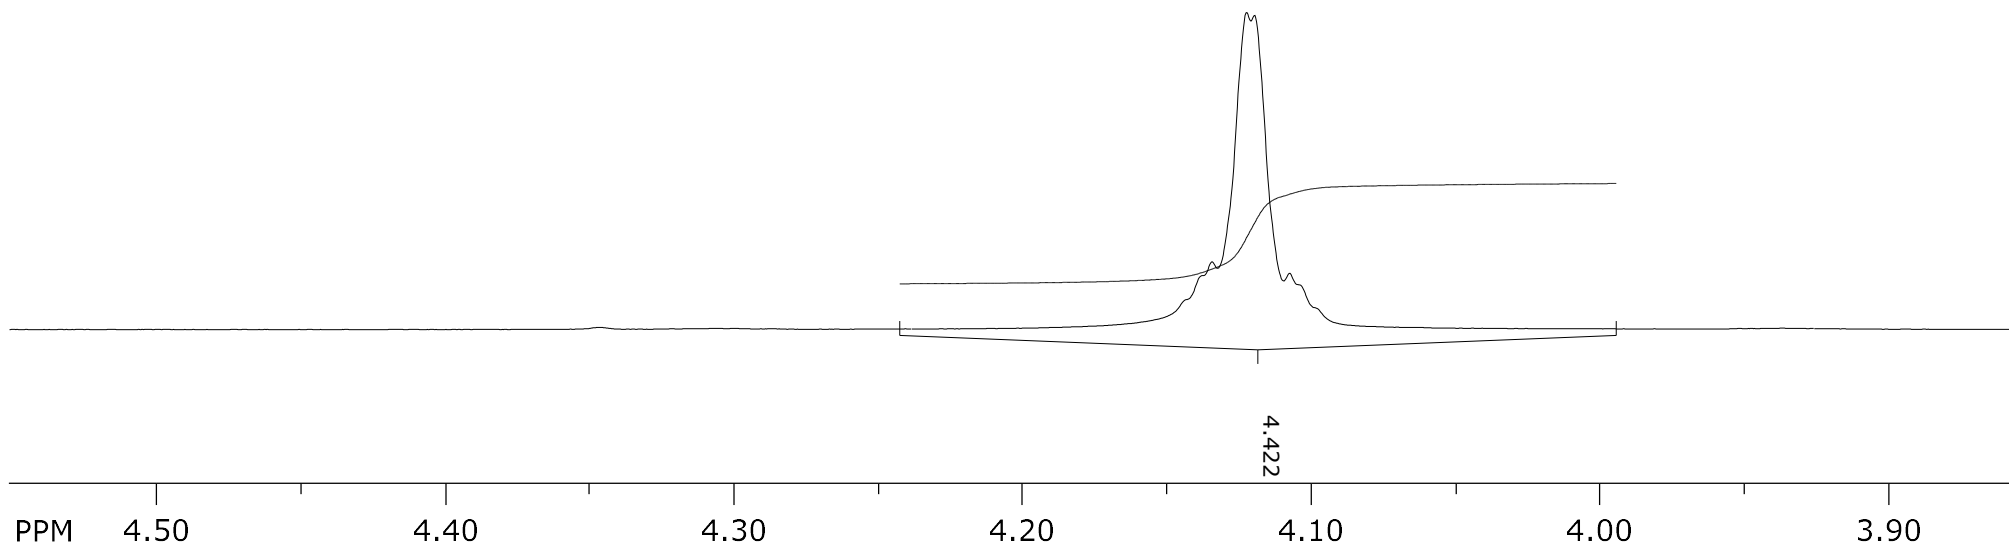

SpinWorks 4: RP 1205 B2  
C13CPD CDCl3 /opt/topspin3.5pl2/nmrdata nmrsu 1

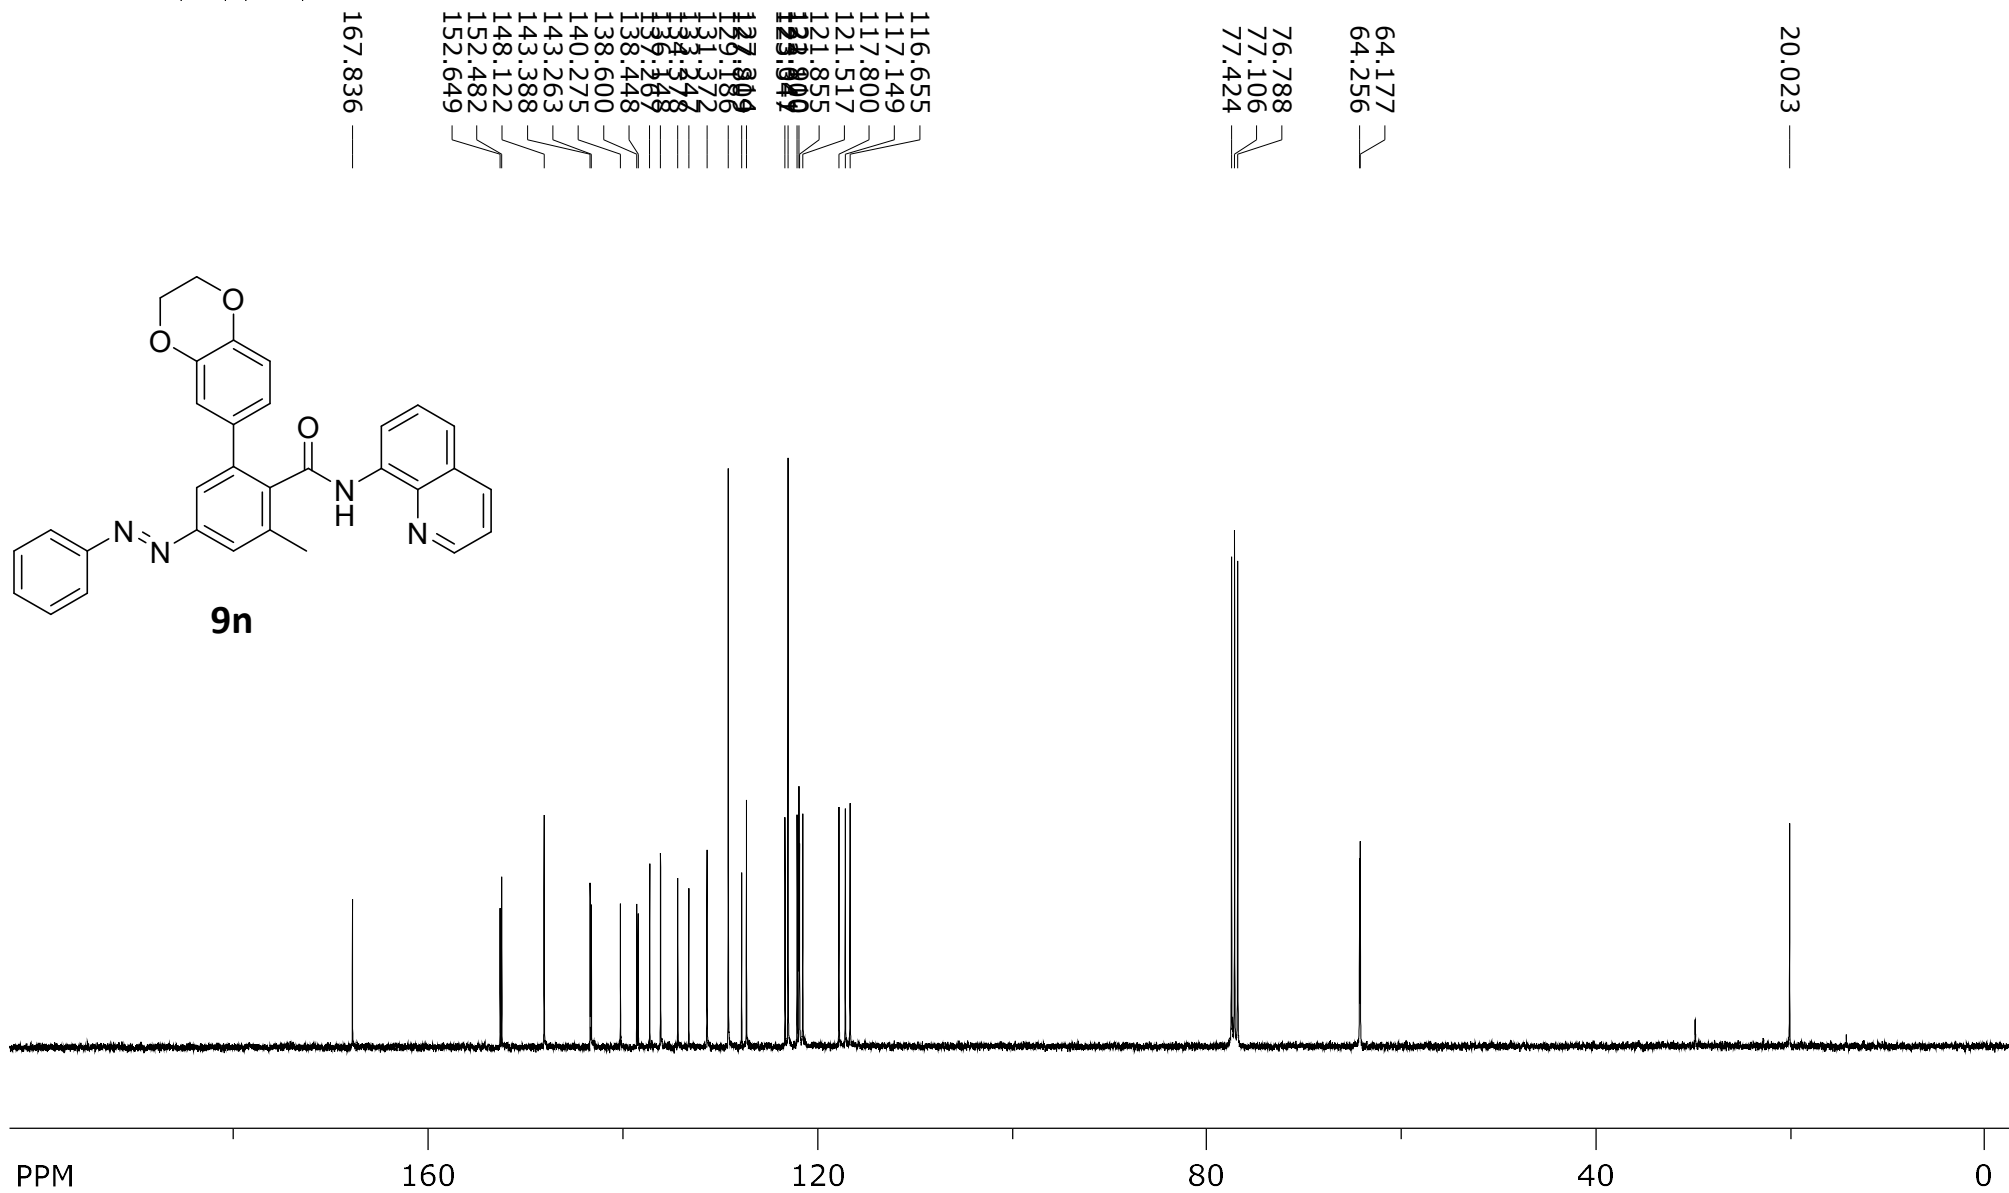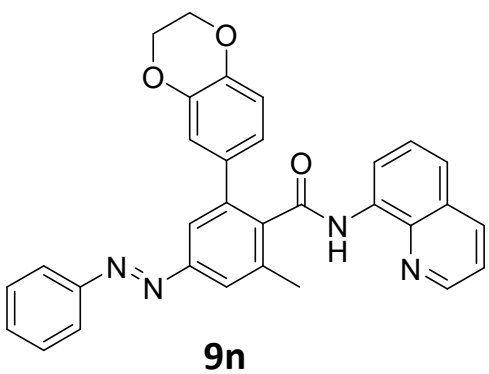

SpinWorks 4: RP 1205 B2  
C13CPD CDCl3 /opt/topspin3.5pl2/nmrdata nmrsu 1

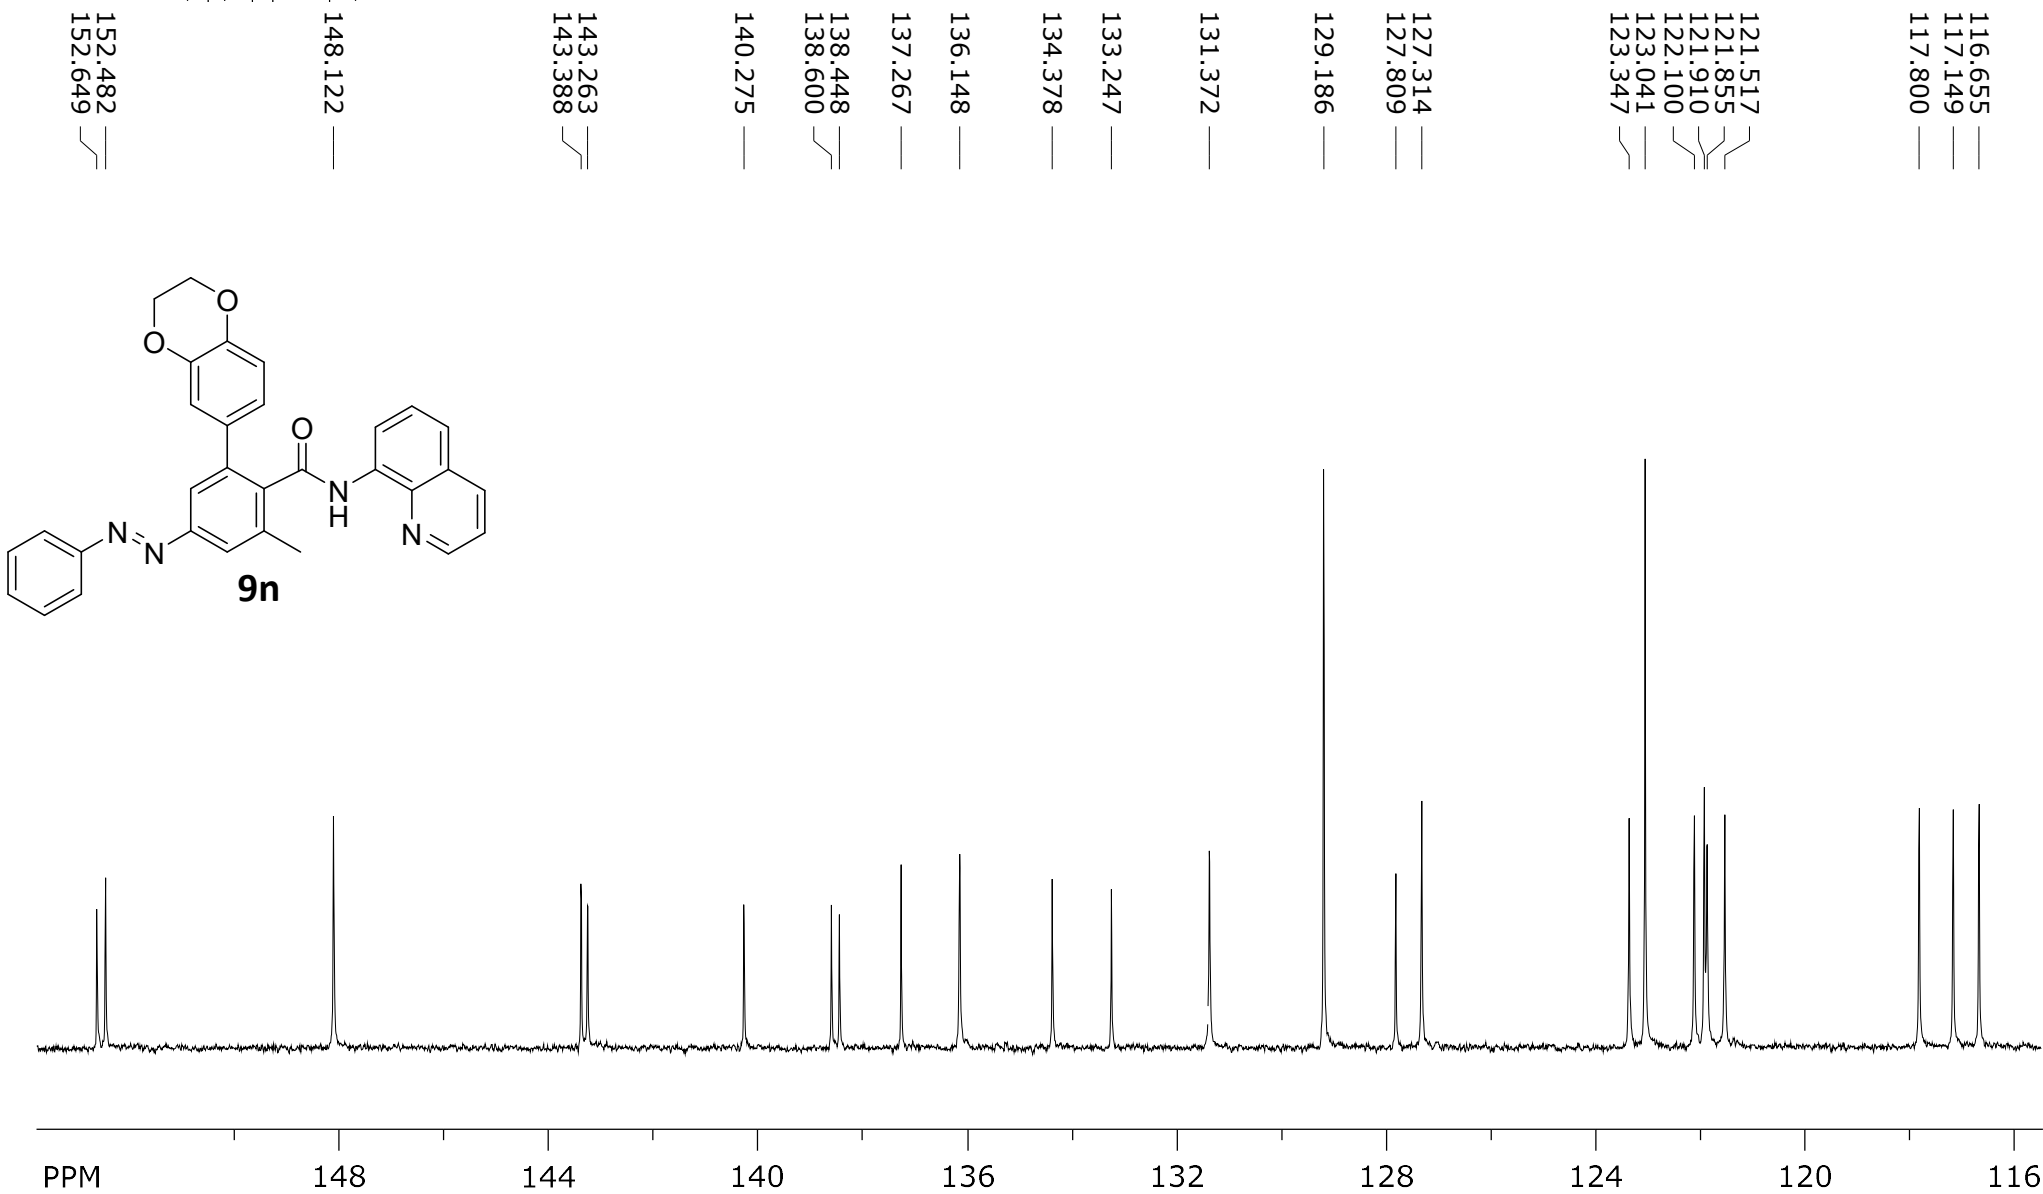



SpinWorks 4: RP 1205 B2  
C13CPD CDCl3 /opt/topspin3.5pl2/nmrdata nmrsu 1

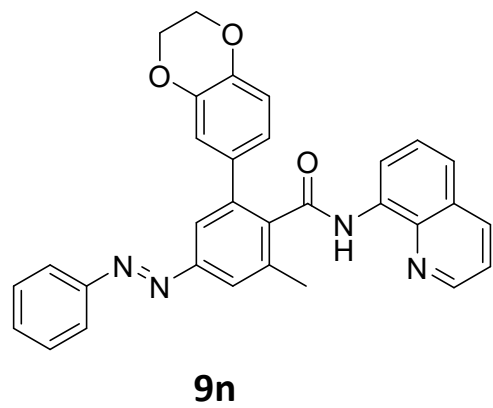

64.177  
64.256

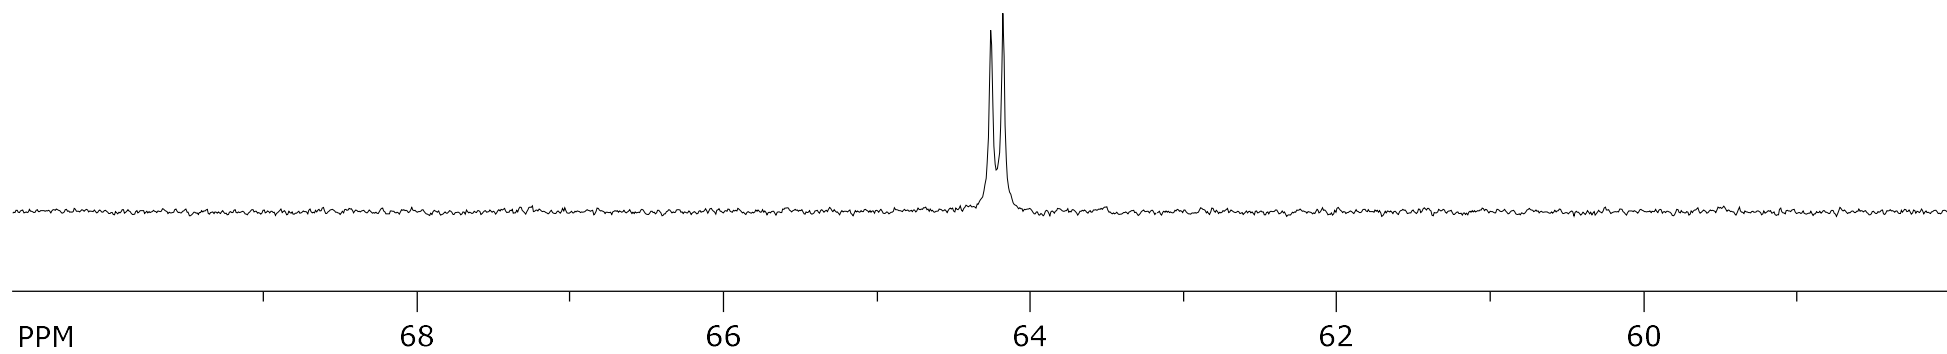

SpinWorks 4: RP 1254 R1  
PROTON CDCl3 /opt/topspin3.5pl2/nmrdata nmrsu 55

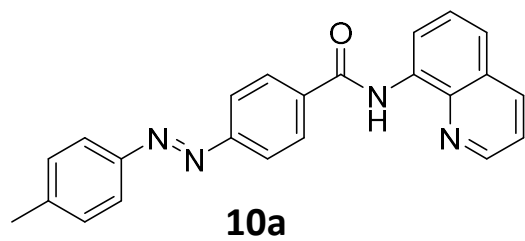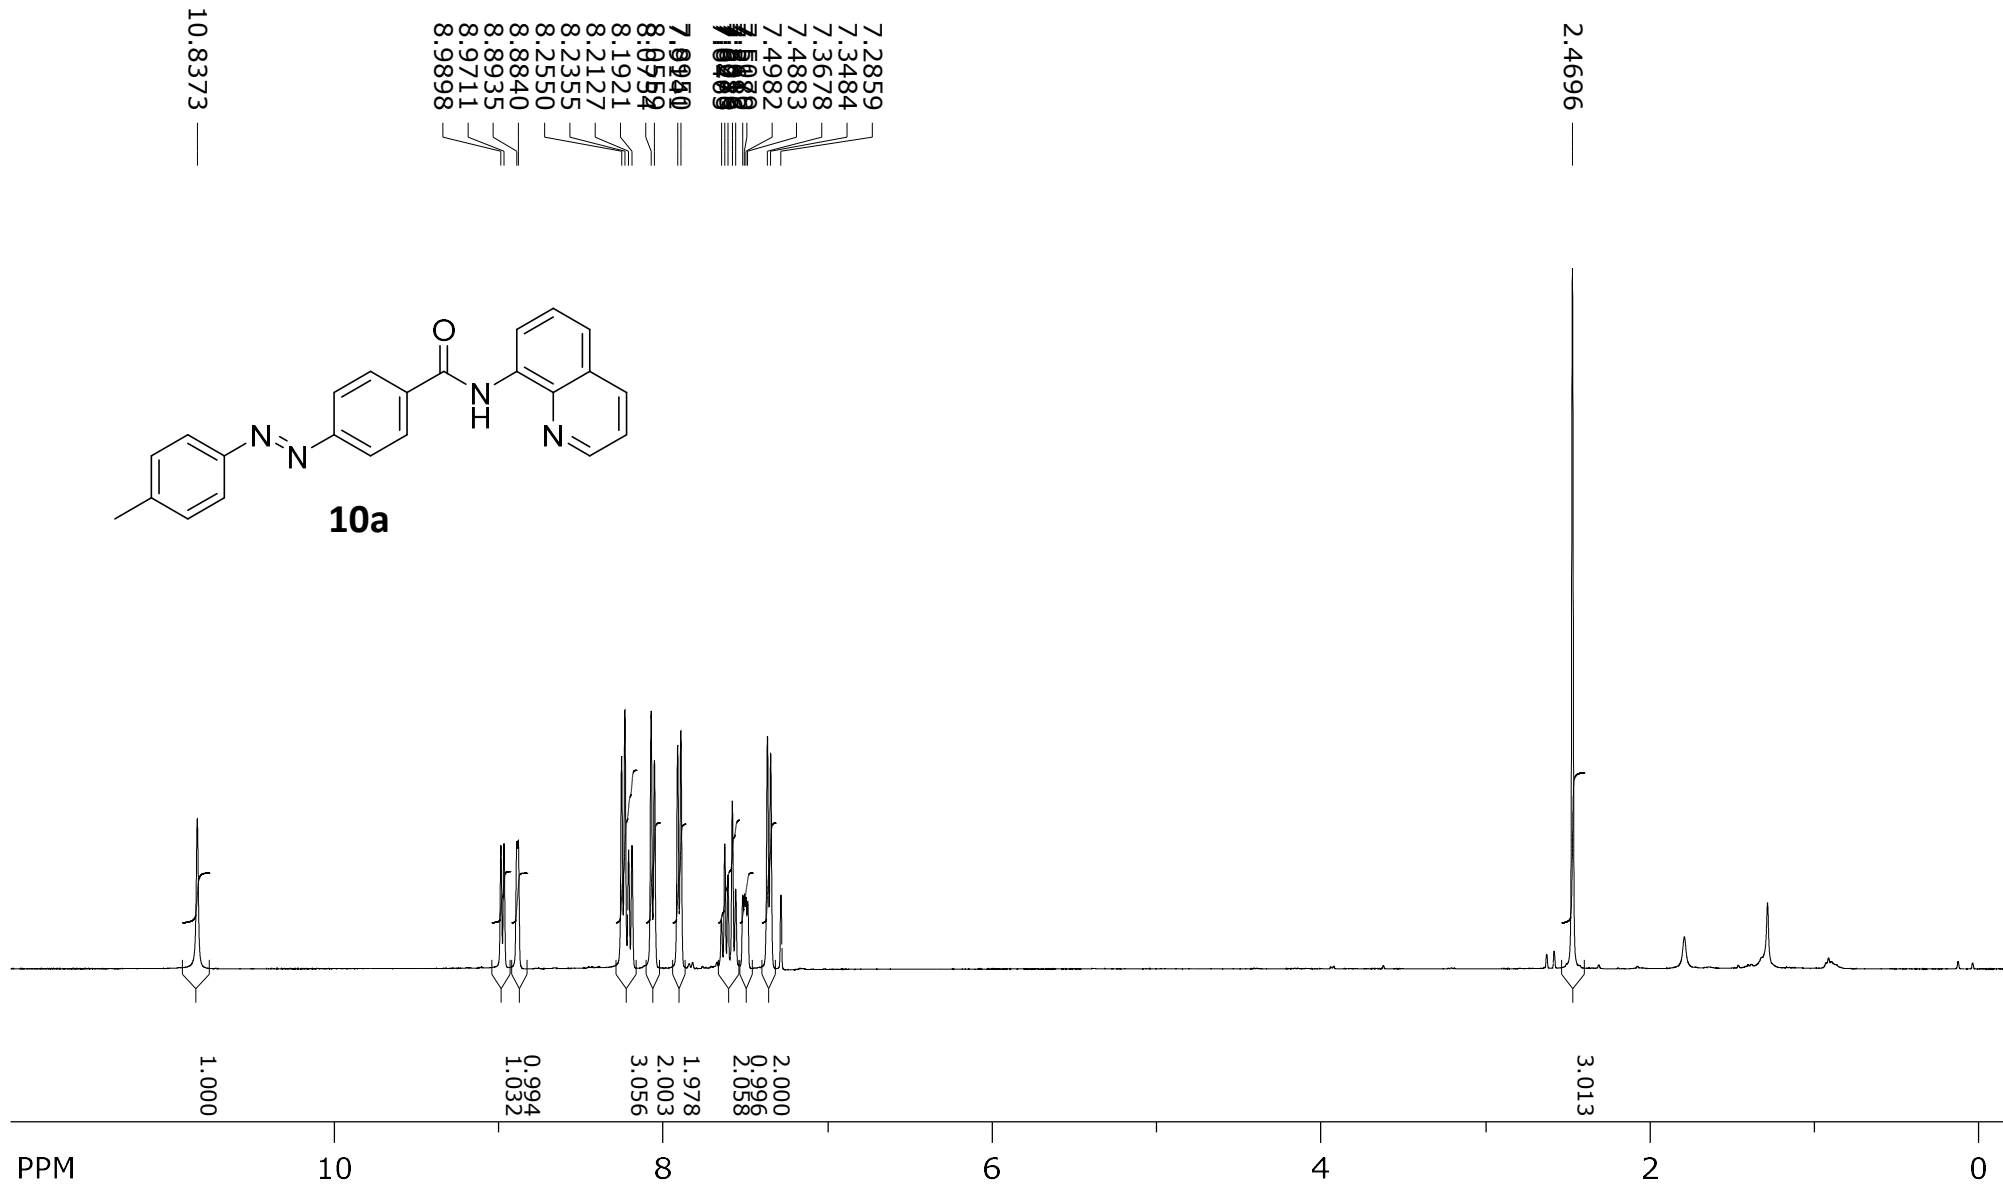

SpinWorks 4: RP 1254 R1  
PROTON CDCl3 /opt/topspin3.5pl2/nmrdata nmrsu 55

8.9711  
8.9898  
8.8840  
8.8935

8.1921  
8.2127  
8.2355  
8.2550

8.0559  
8.0754

7.8950  
7.9141

7.5612  
7.5816  
7.6083  
7.6276  
7.6463  
7.5180  
7.5079  
7.4982  
7.4883

7.3484  
7.3678  
7.2859

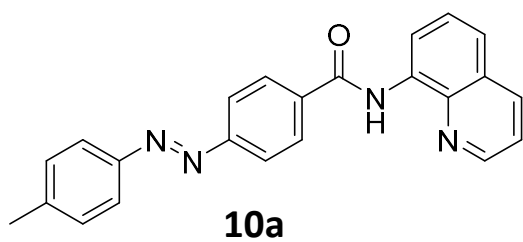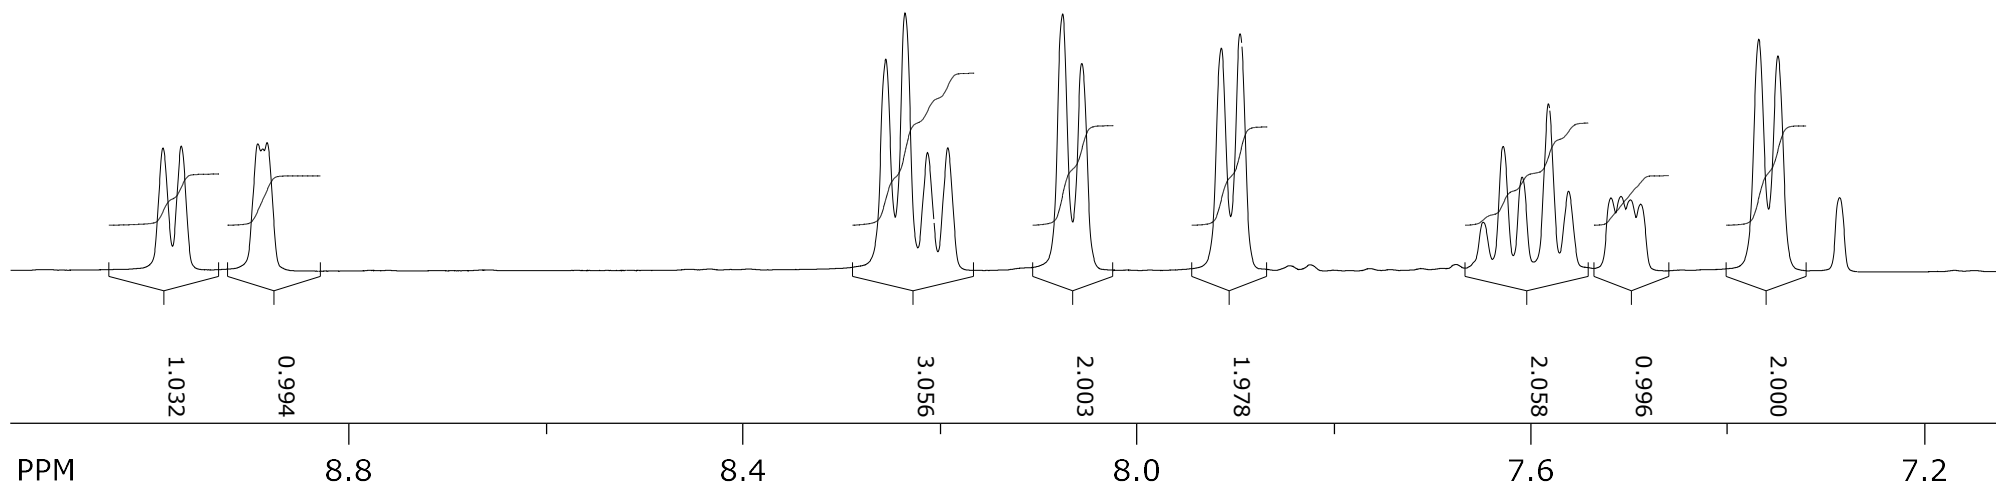

SpinWorks 4: RP 1254 R1  
C13CPD CDCl3 /opt/topspin3.5pl2/nmrdata nmrsu 55

164.711 —  
154.583 —  
148.392 —  
142.405 —  
138.768 —  
136.501 —  
136.456 —  
134.474 —  
129.881 —  
128.310 —  
127.488 —  
123.212 —  
123.056 —  
121.917 —  
121.791 —  
116.653 —

76.772 —  
77.090 —  
77.408 —

21.636 —

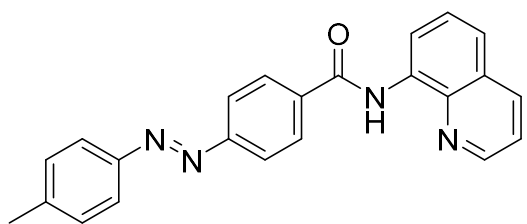

**10a**

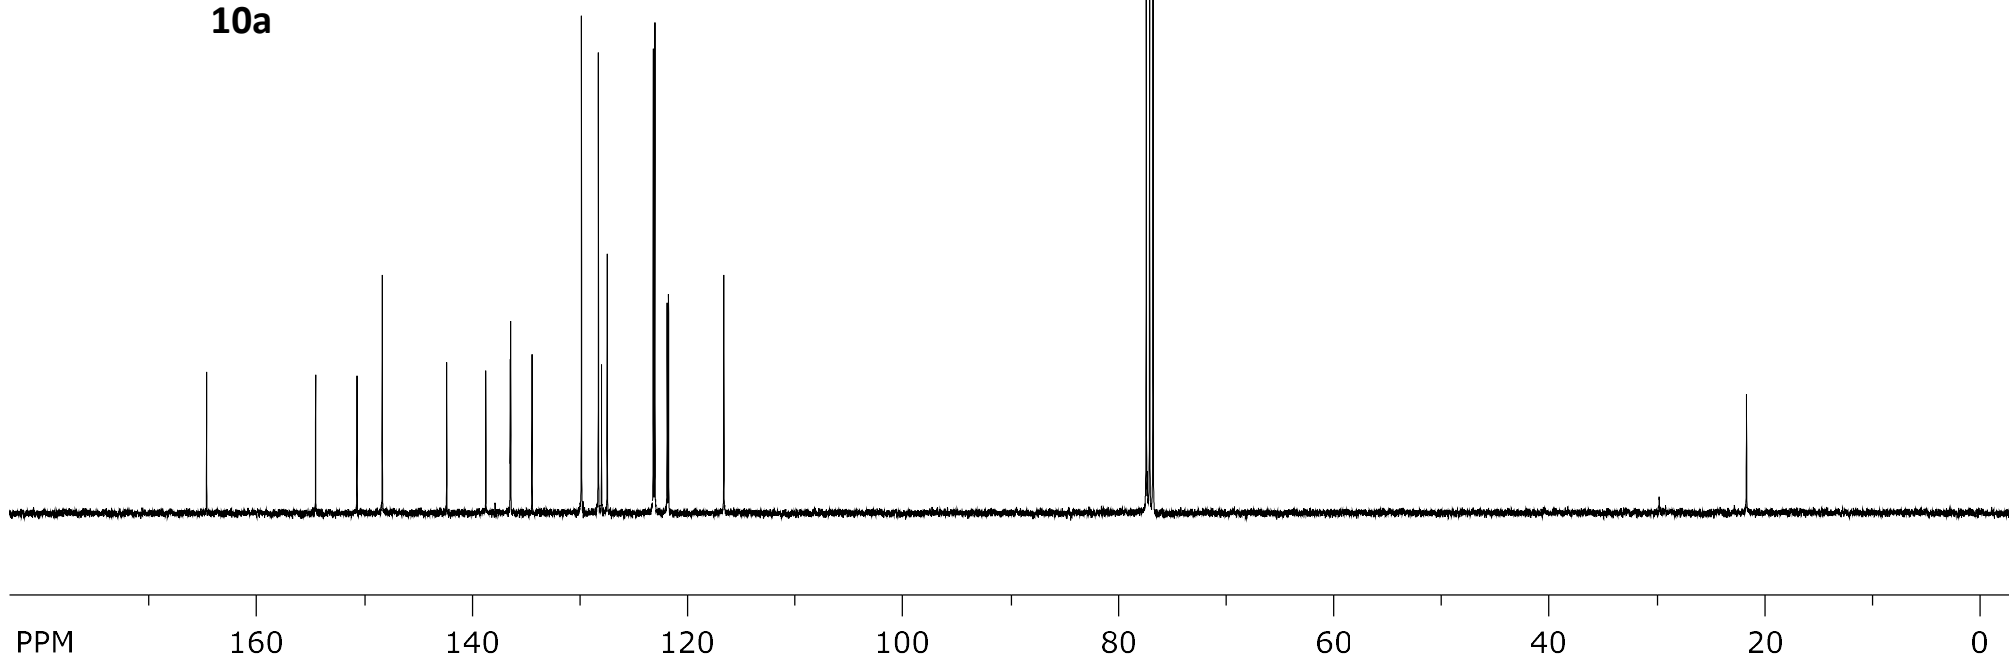

SpinWorks 4: rp 1256 b2  
PROTON CDCl3 /opt/topspin3.5pl2/nmrdata nmrsu 29

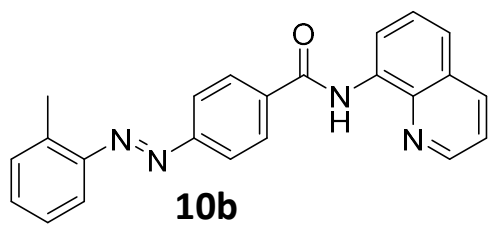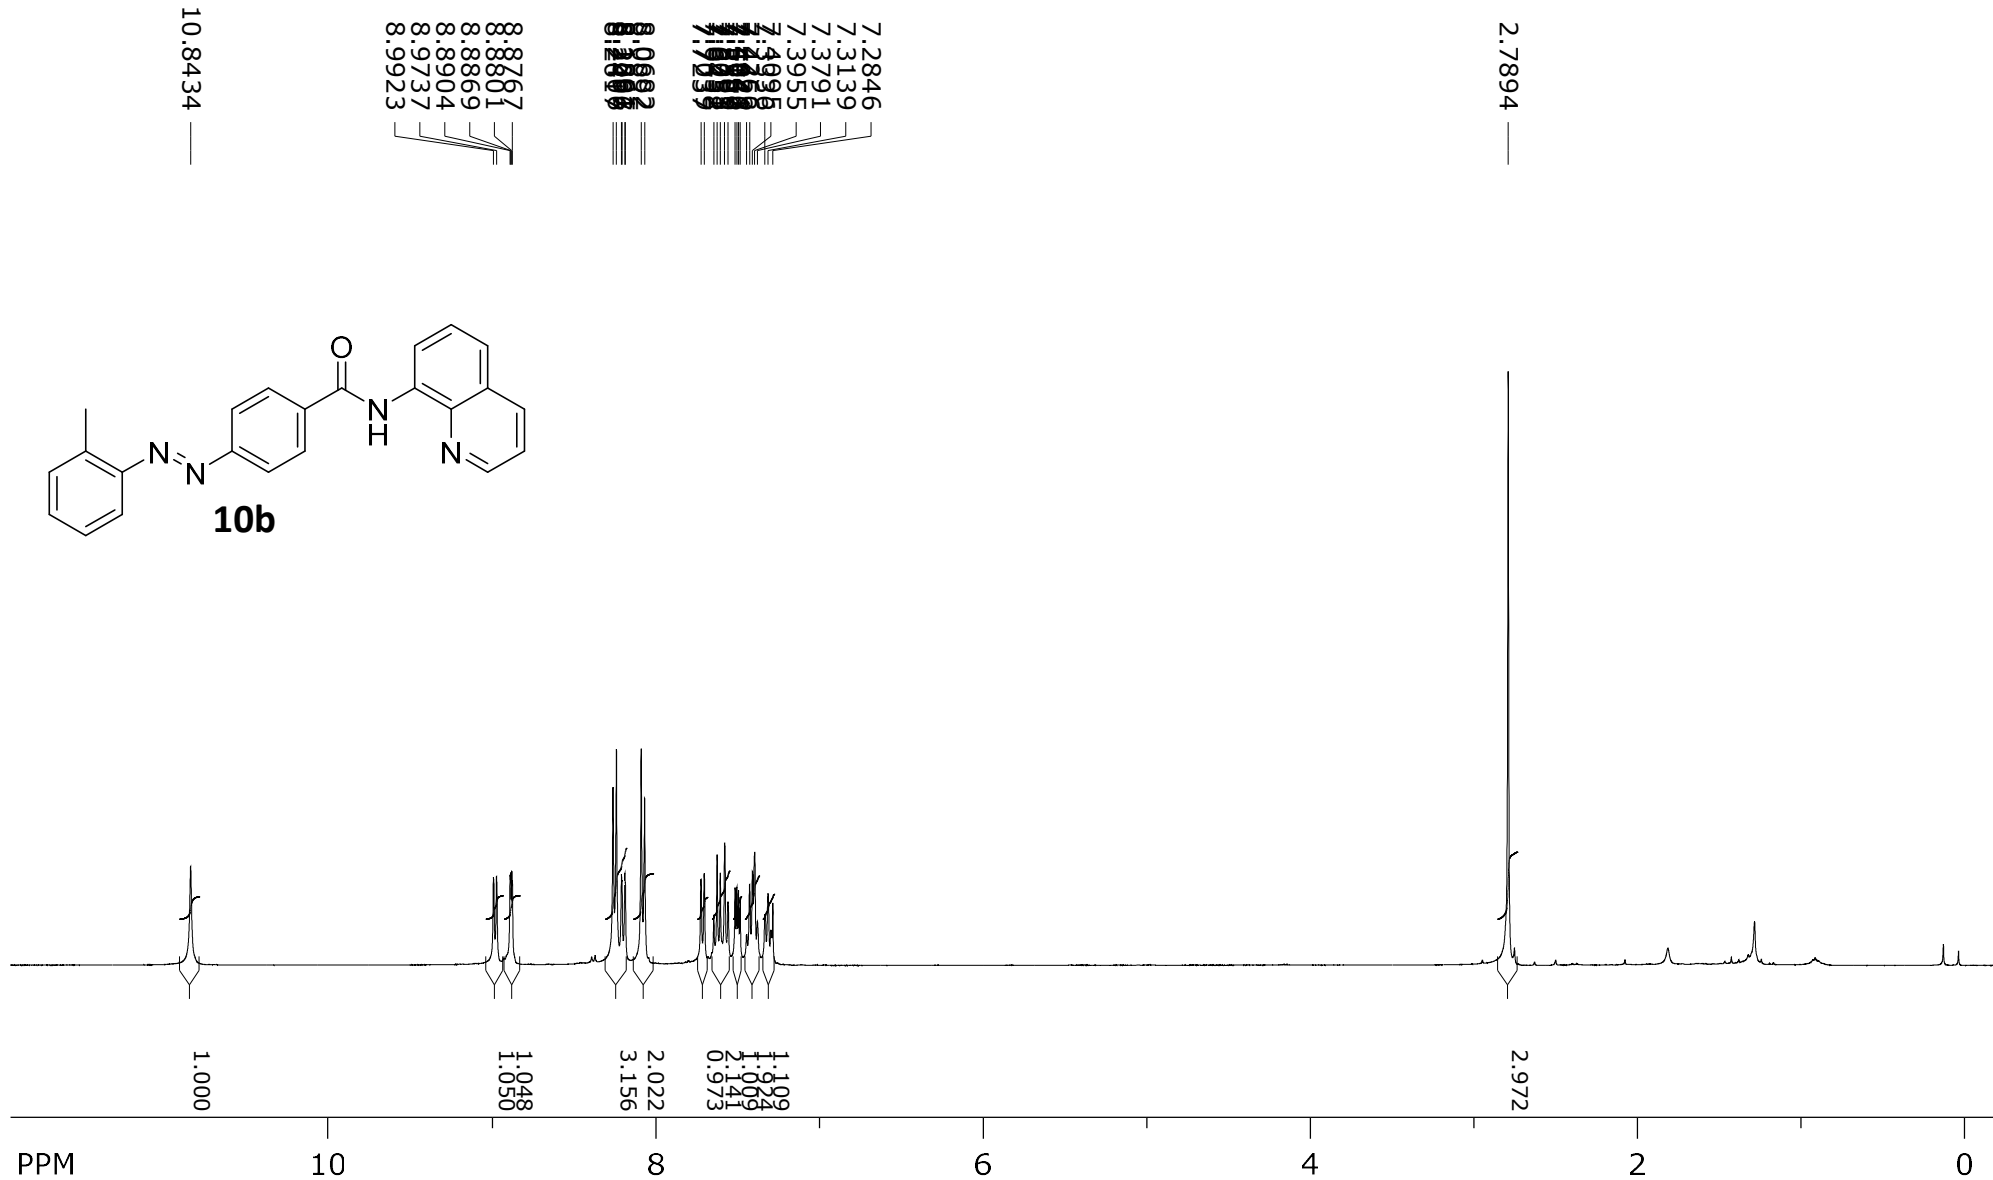

SpinWorks 4: rp 1256 b2  
PROTON CDCl3 /opt/topspin3.5pl2/nmrdata nmrsu 29

8.8767  
8.8801  
8.8869  
8.8904  
8.9737  
8.9923

8.1861  
8.1891  
8.2066  
8.2097  
8.2406  
8.2617

8.0682  
8.0892

7.7039  
7.7237

7.5589  
7.5793  
7.6058  
7.6251  
7.6452

7.5152  
7.5047  
7.4946  
7.4841  
7.4453  
7.4266  
7.4095  
7.3955  
7.3396  
7.3139  
7.2846

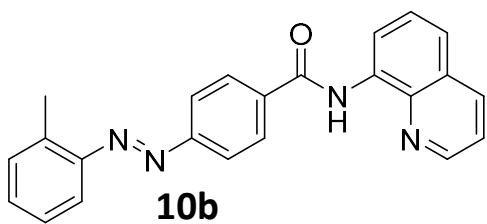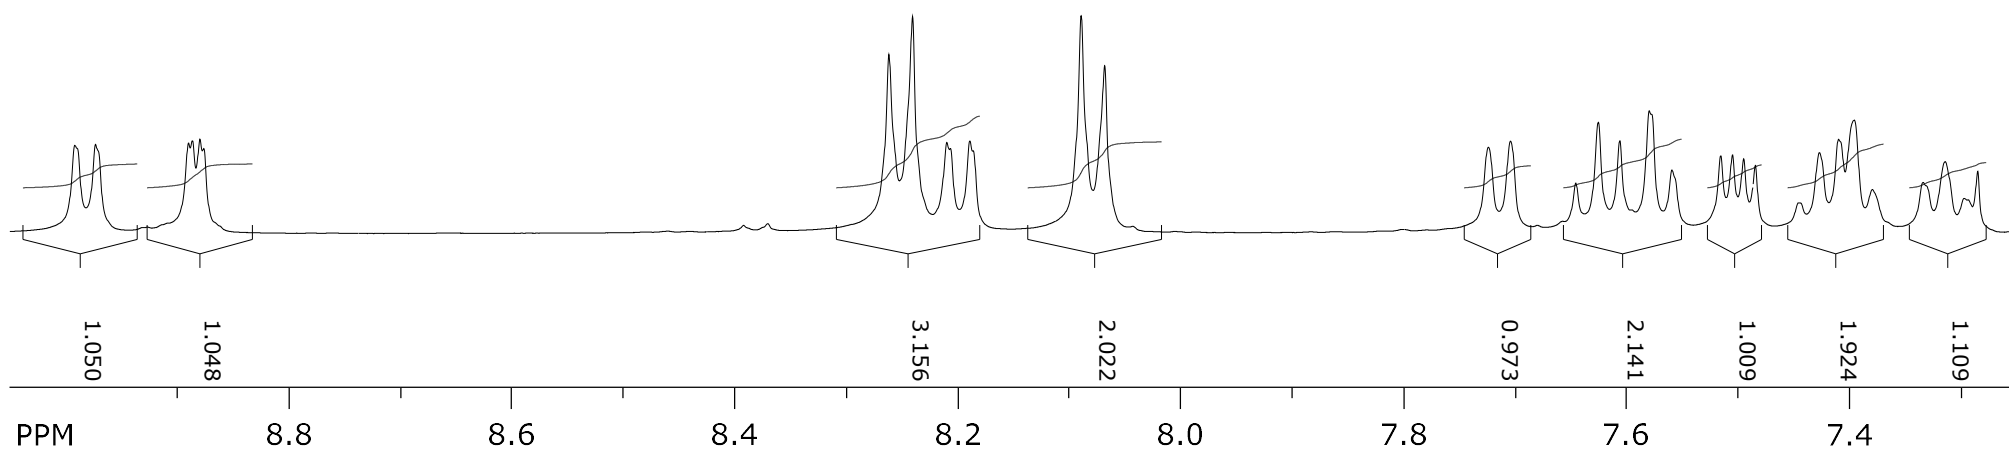

SpinWorks 4: rp 1256 b2  
C13CPD256 CDCl3 /opt/topspin3.5pl2/nmrdata nmrsu 29

164.662  
154.760  
150.619  
148.383  
138.922  
138.754  
136.454  
136.559  
134.450  
131.680  
131.445  
128.314  
128.008  
127.483  
126.508  
123.257  
121.933  
121.795  
116.641  
115.376

76.781  
77.099  
77.416

17.625

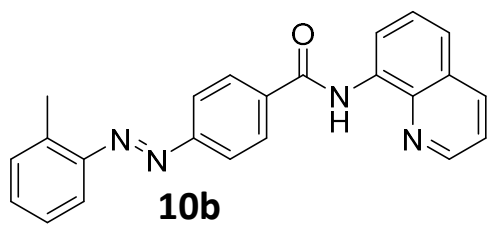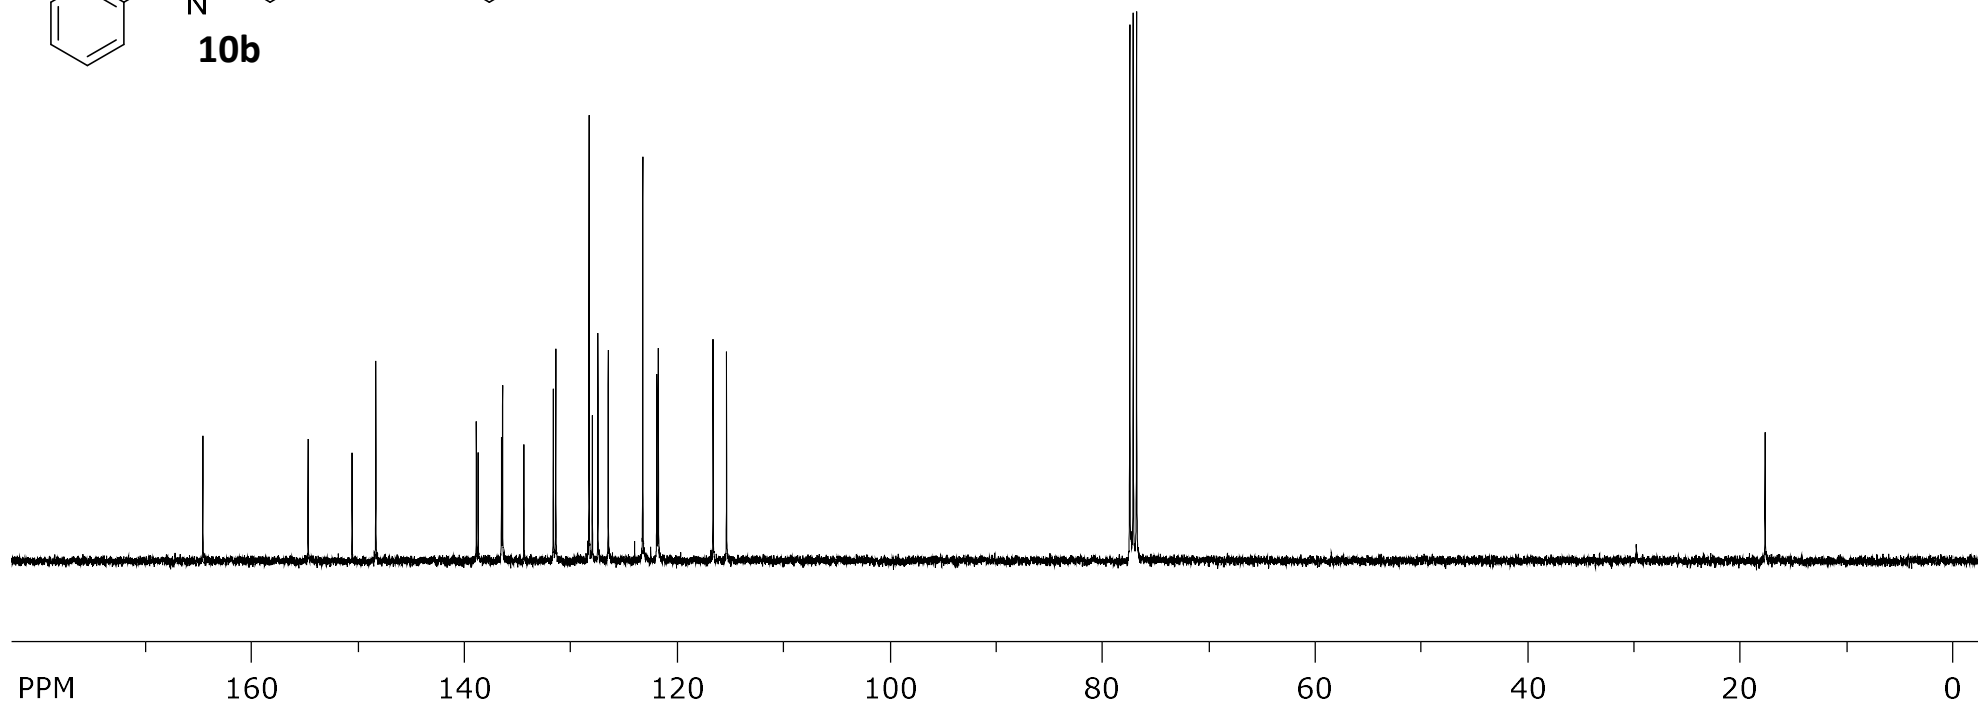

9.3331  
8.7033  
8.6851  
8.2018  
8.1811  
8.1013  
8.0807  
8.0074  
7.9885  
7.9990  
7.9990  
7.5939  
7.5792  
7.5613  
7.5466  
7.2851

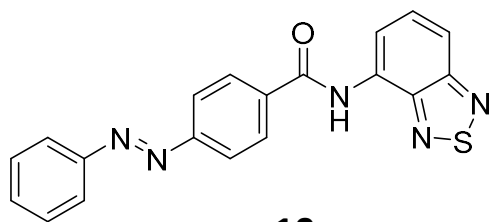

10c

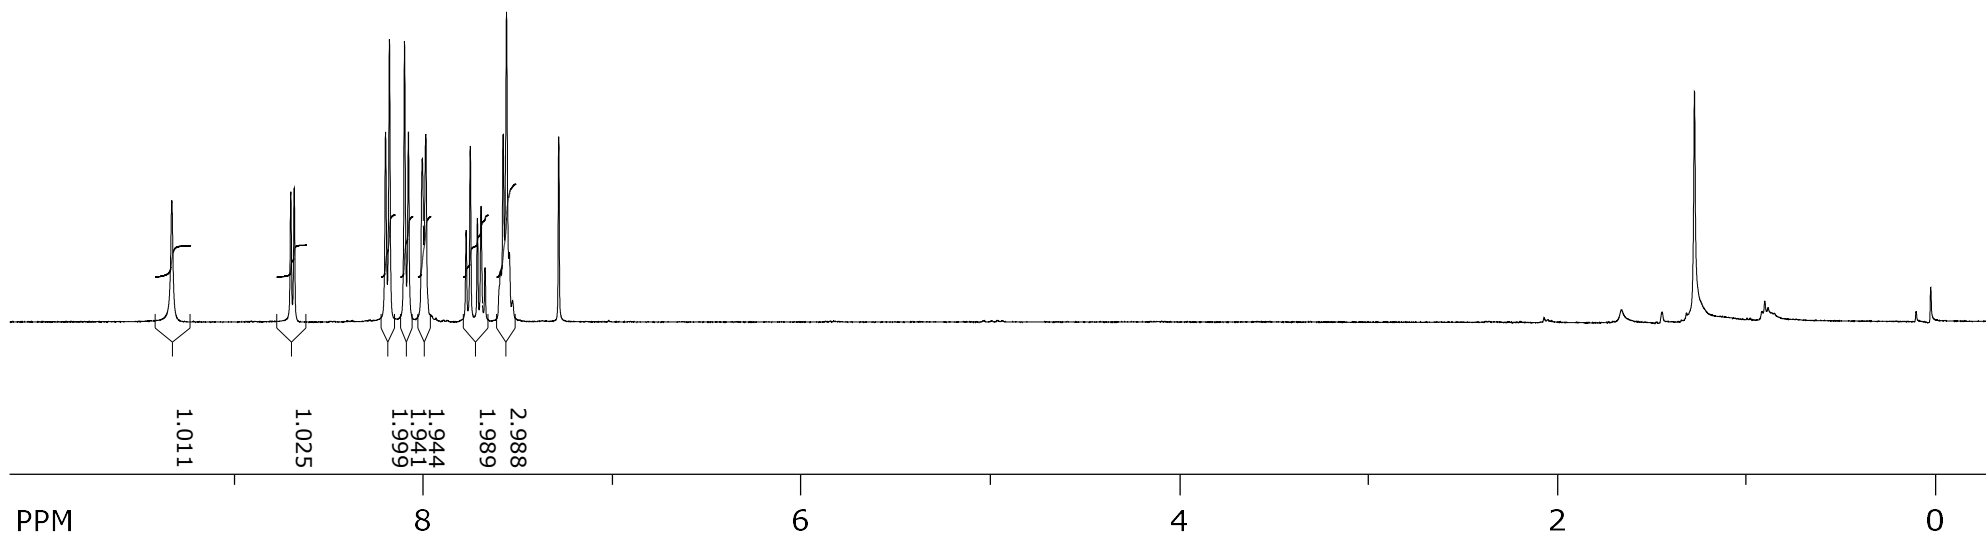



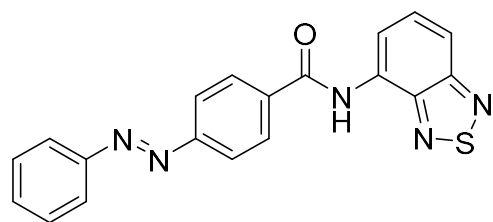

**10c**

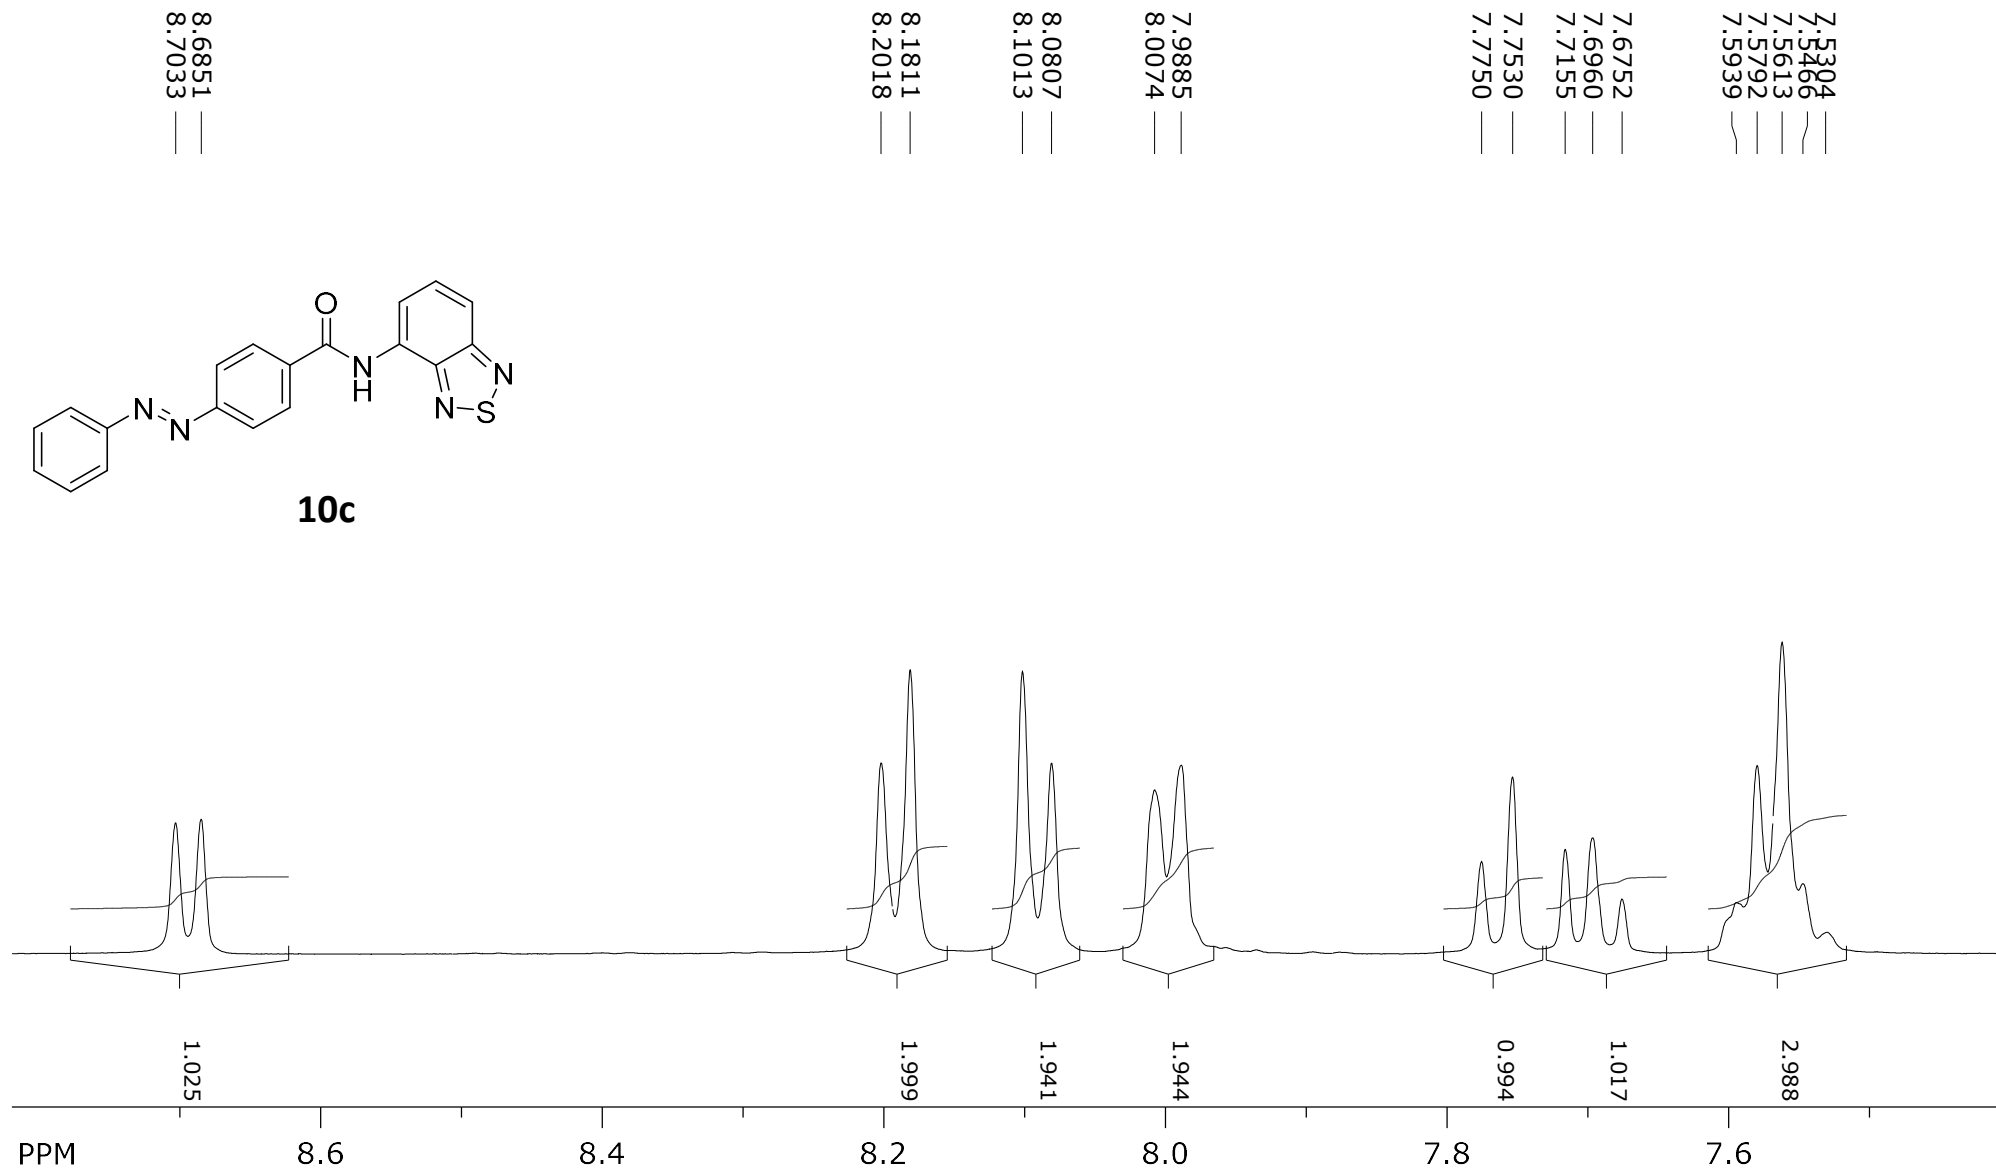



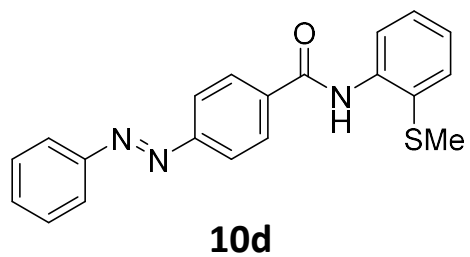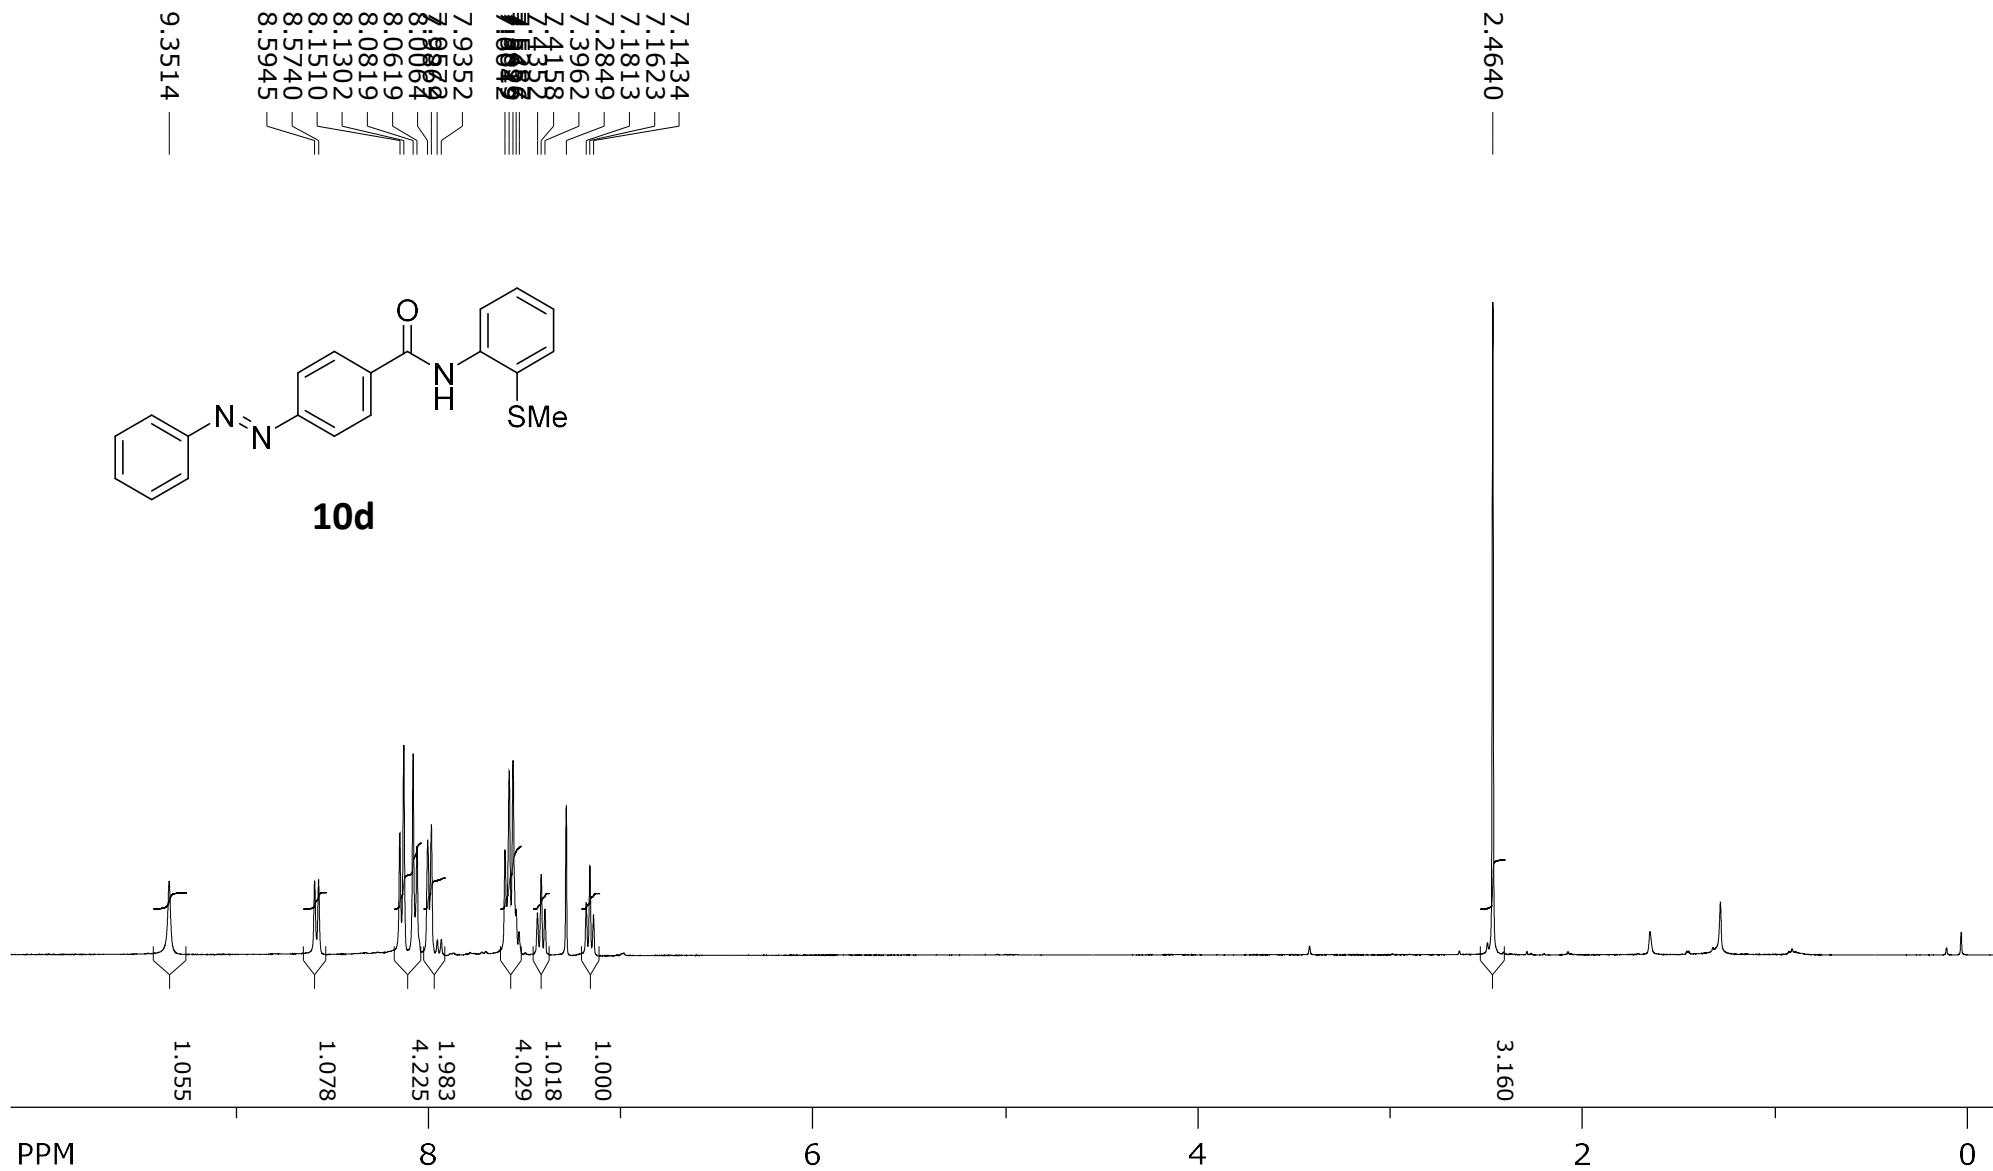

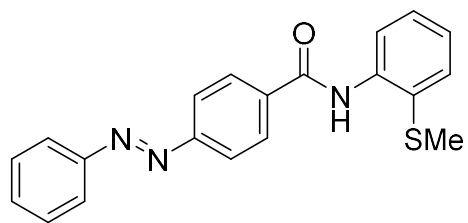

**10d**

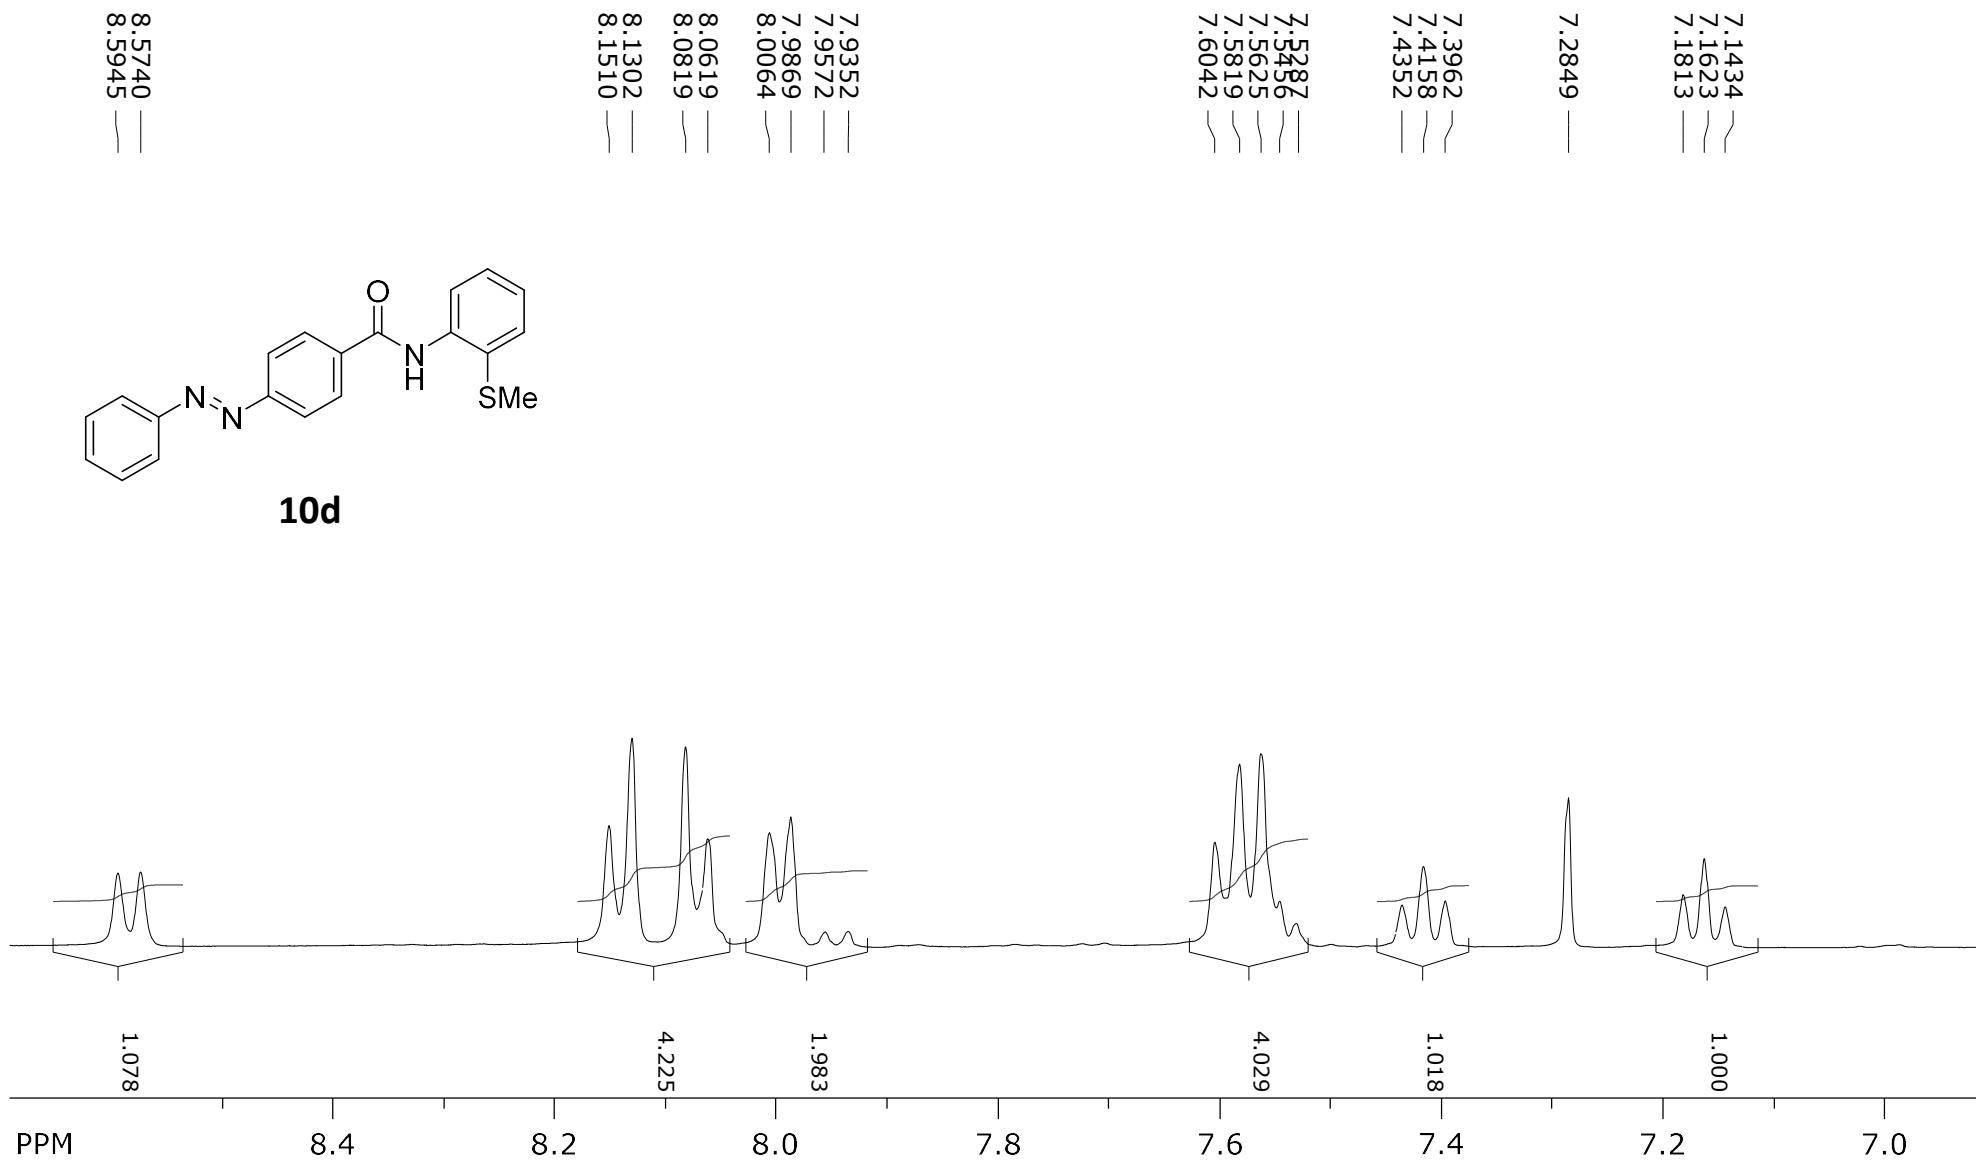

SpinWorks 4: RP 971 A2  
C13CPD256 CDCl3 /opt/topspin3.5pl2/nmrdata nmrsu 33

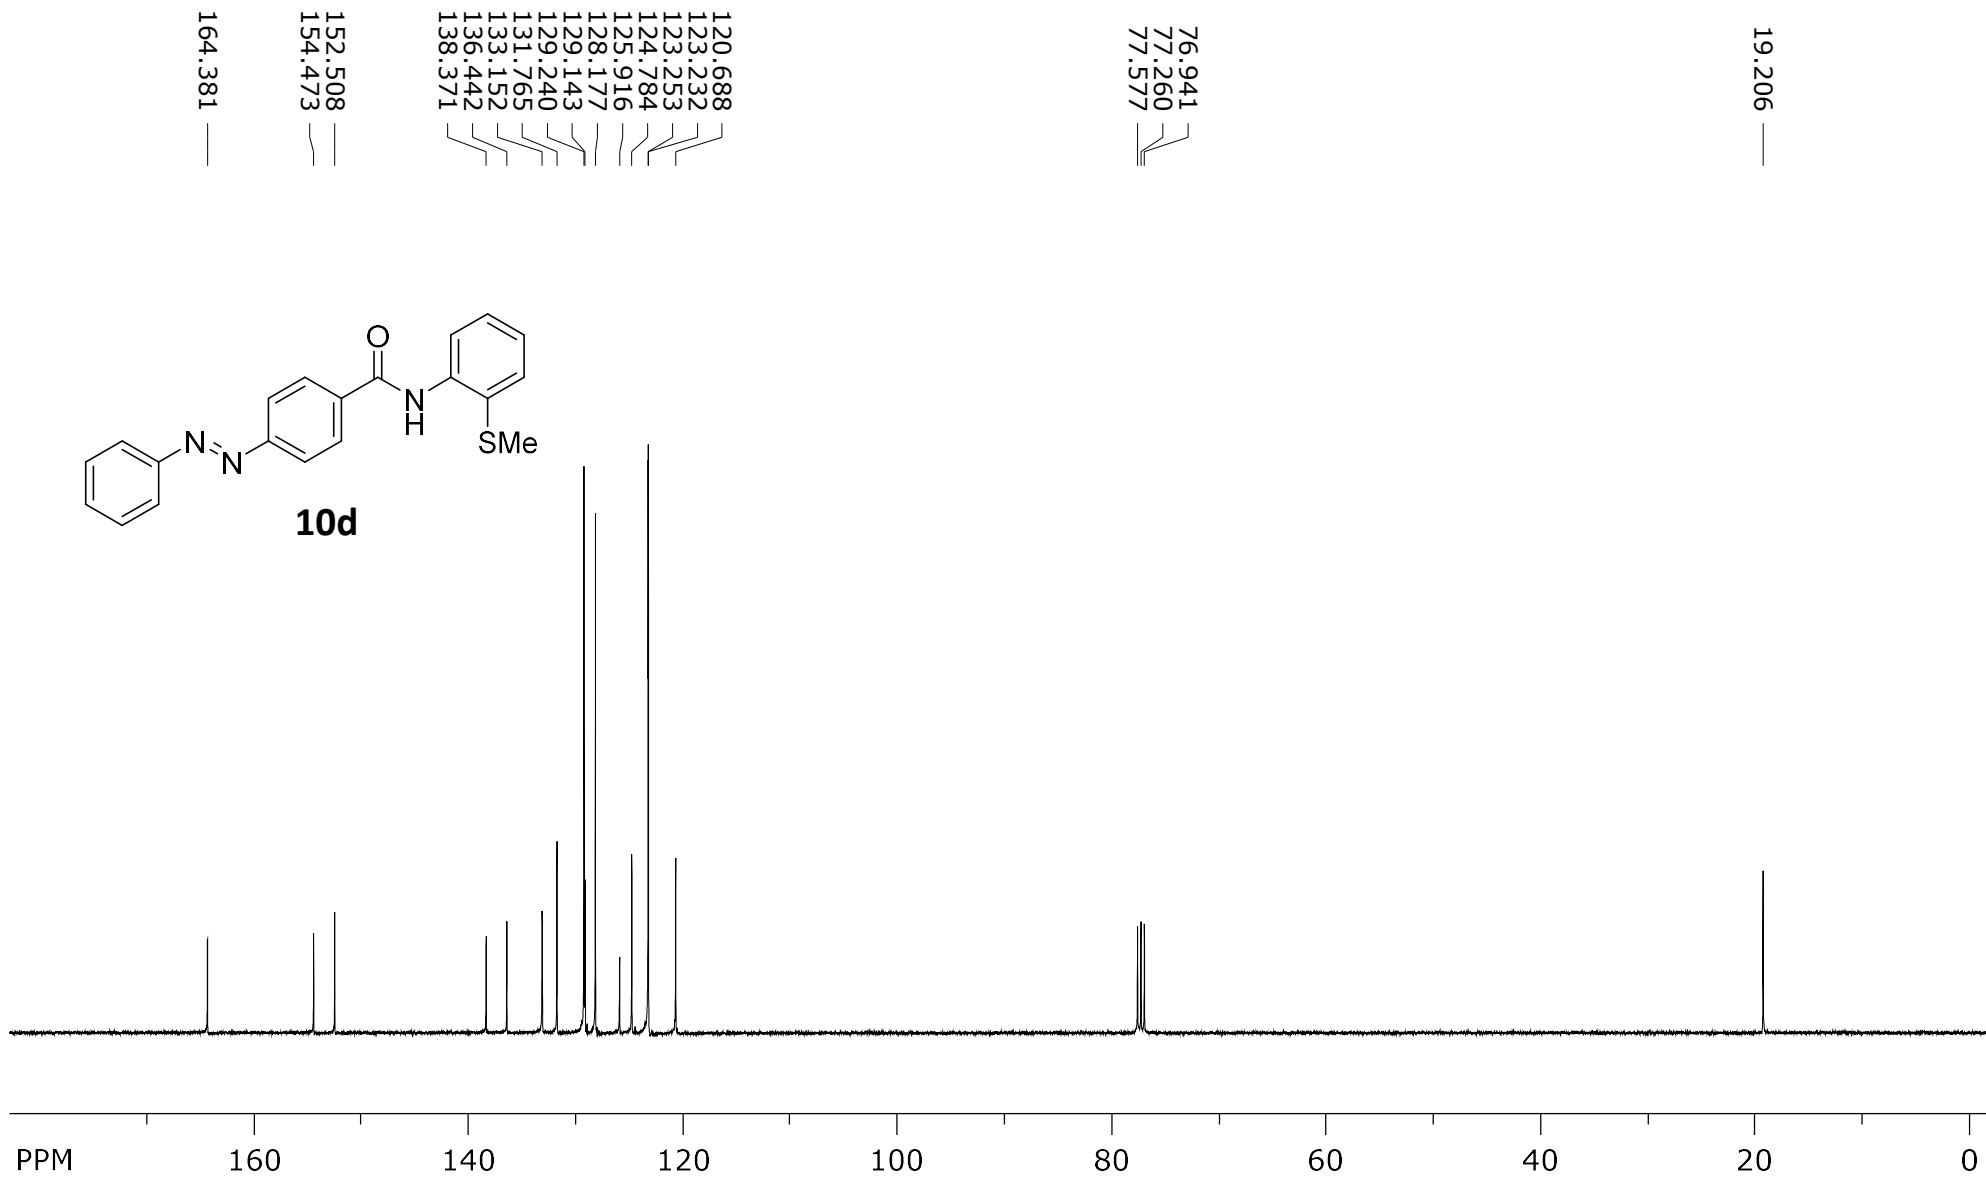



7.9716  
7.9749  
7.9914  
7.9957

7.8519  
7.8706

7.7392  
7.7603

7.5322  
7.5479  
7.5524  
7.5713  
7.5932

7.3820  
7.4016  
7.4203

7.2851

7.1513  
7.1545  
7.1704  
7.1735  
7.1893  
7.1925

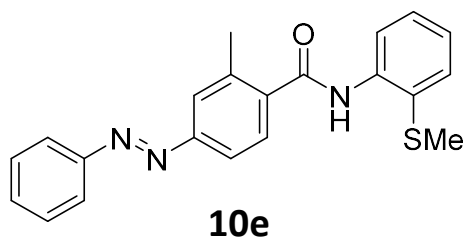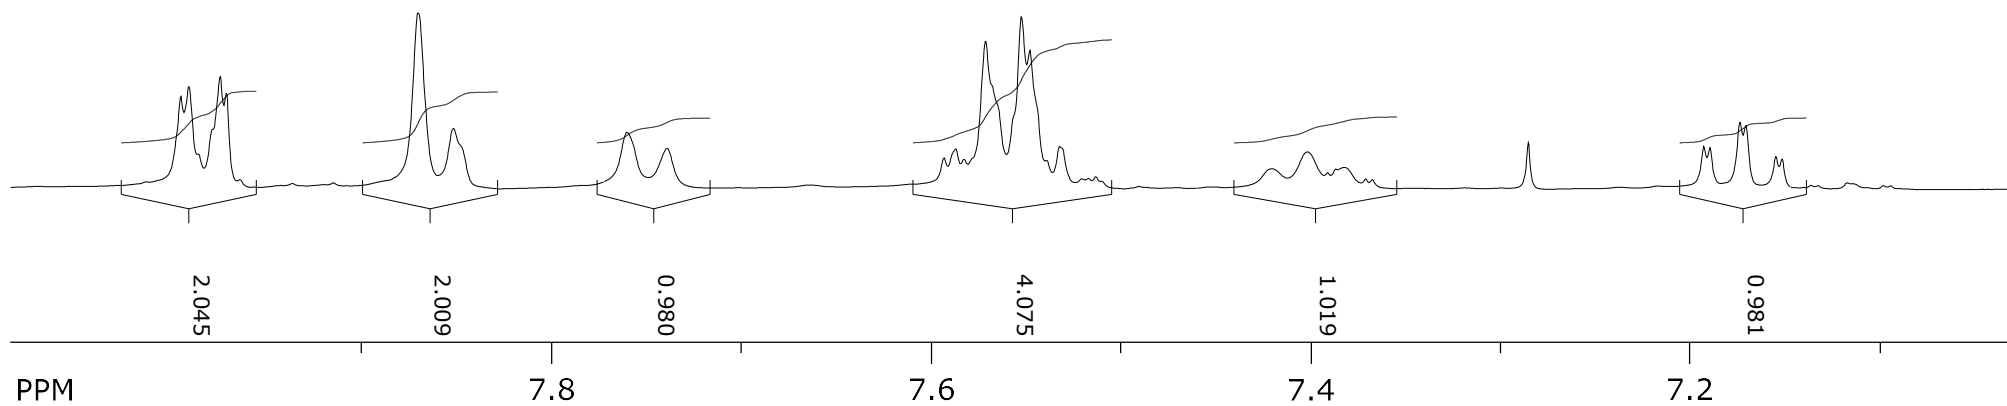

SpinWorks 4: SAB130302  
C13CPD CDCl3 {D:\Spectra} nmr 31

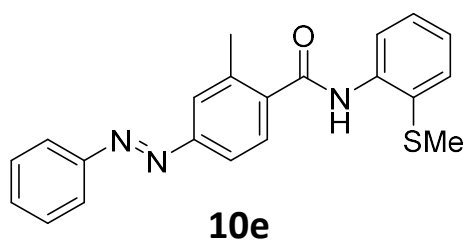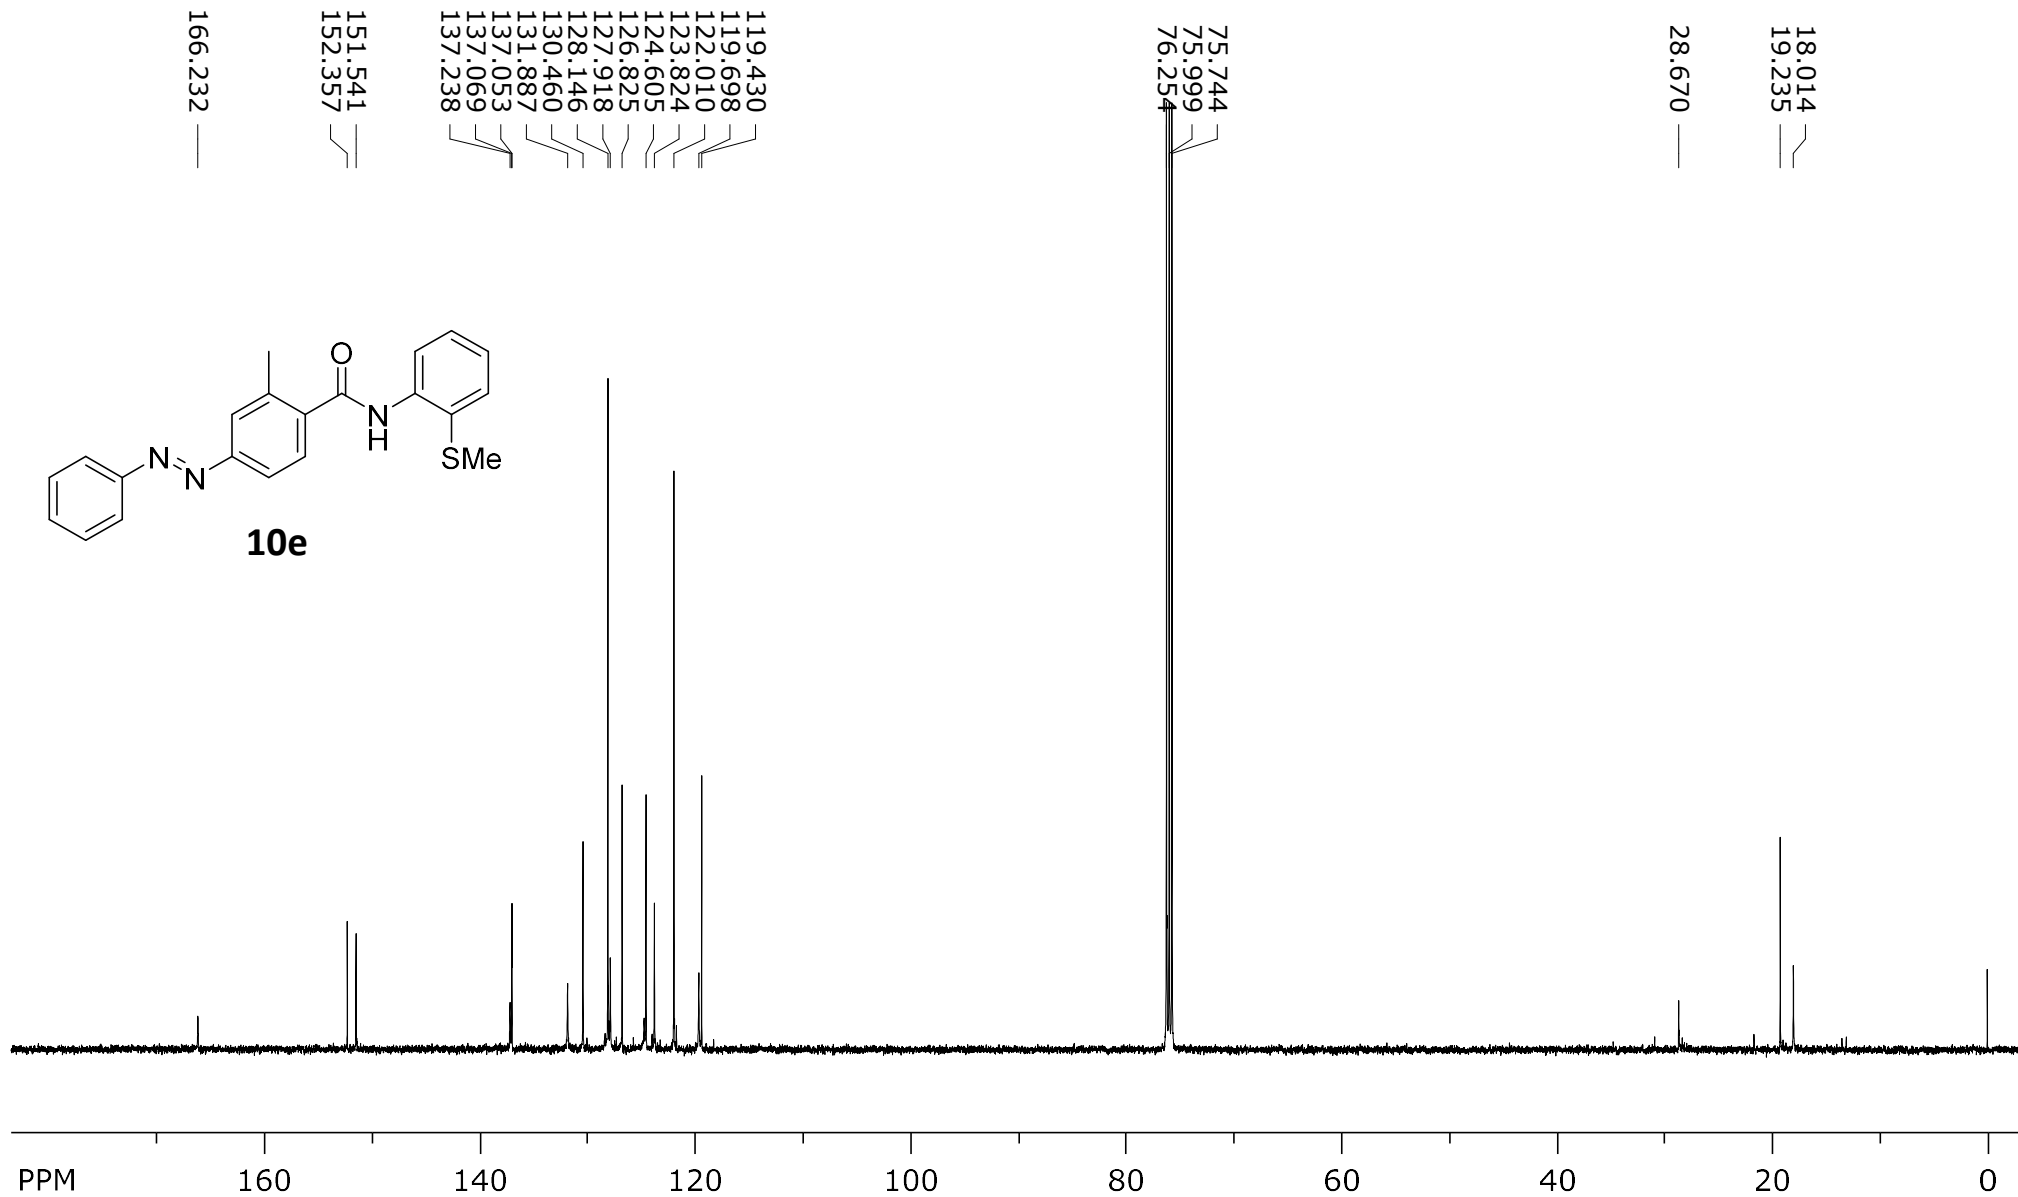



SpinWorks 4: SAB130302  
C13CPD CDCl3 {D:\Spectra} nmr 31

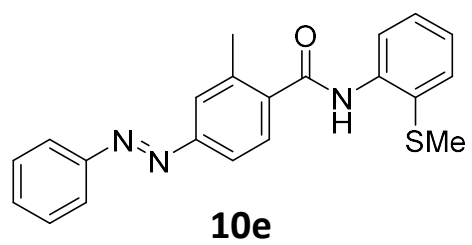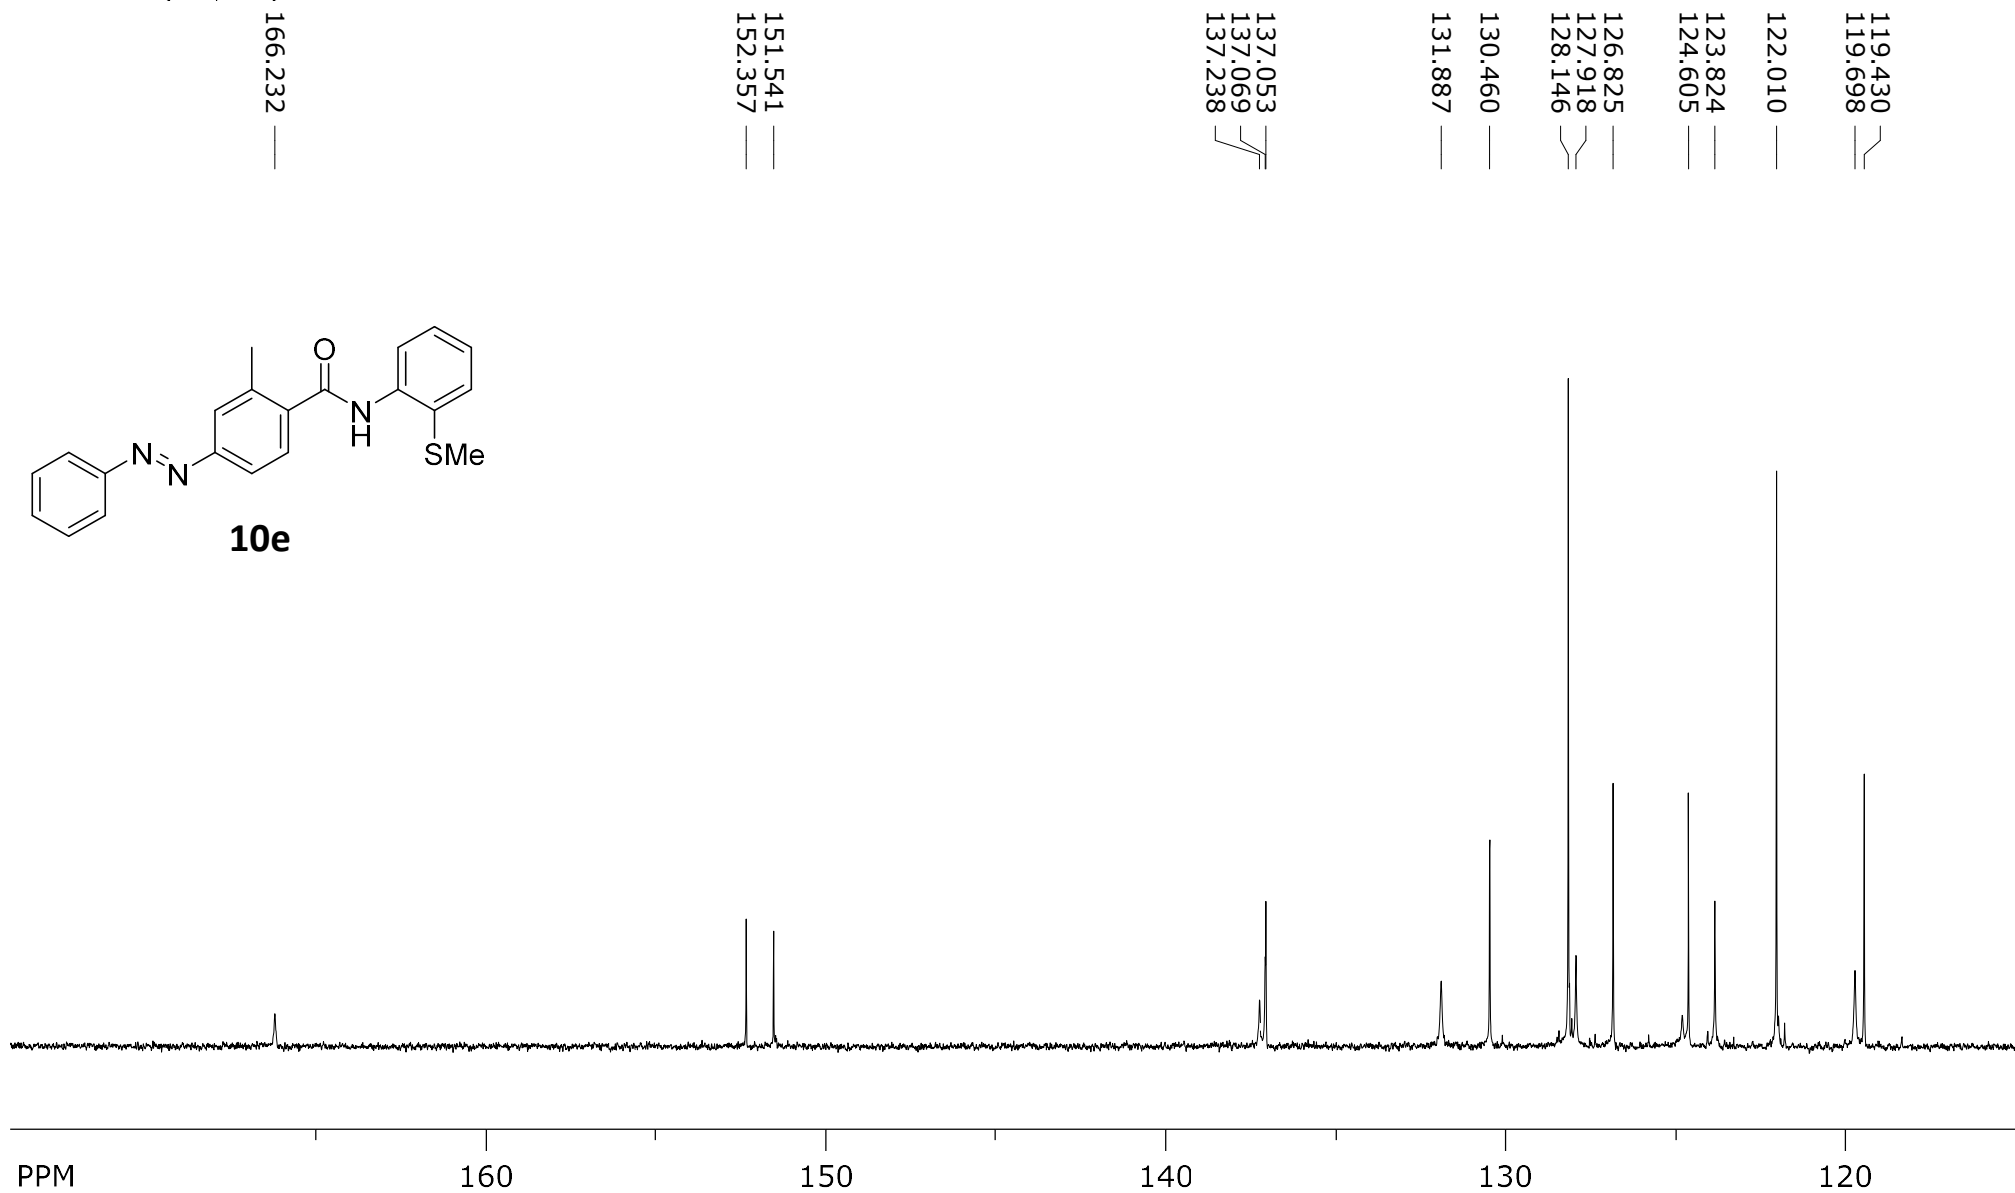

SpinWorks 4: RP 1313 A2  
PROTON CDCl3 /opt/topspin3.5pl2/nmrdata nmrsu 15

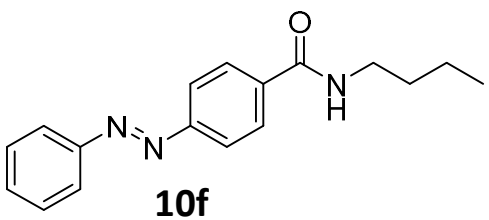

7.5398  
7.5376  
7.9154  
7.9399

6.5480

3.5080  
3.4688  
3.4948

0.9593  
0.9774  
0.9957  
1.6097  
1.6119  
1.6157  
1.6381

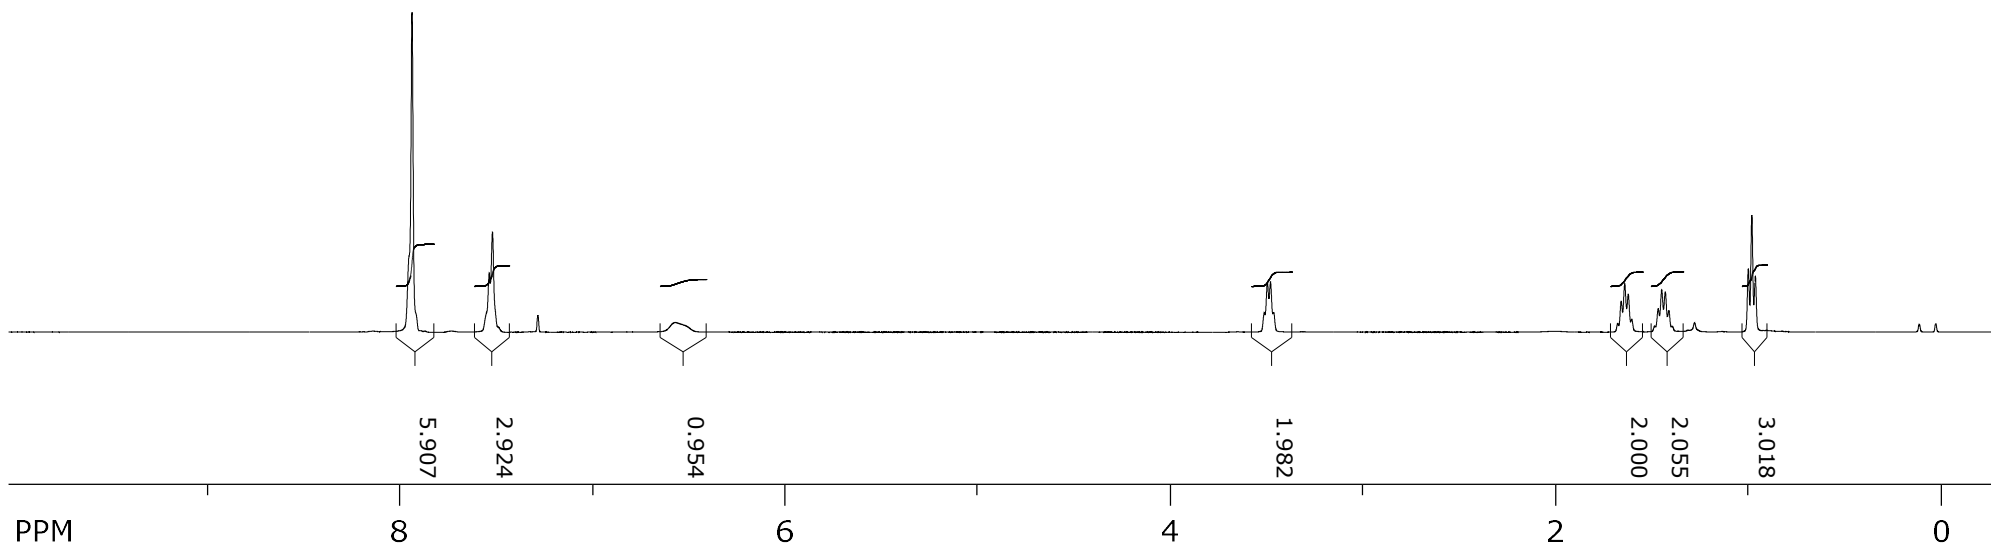

SpinWorks 4: RP 1313 A2  
PROTON CDCl3 /opt/topspin3.5pl2/nmrdata nmrsu 15

7.9154  
7.9389  
7.9578  
|  
|  
|

7.5208  
7.5379  
|  
|

6.5480  
—

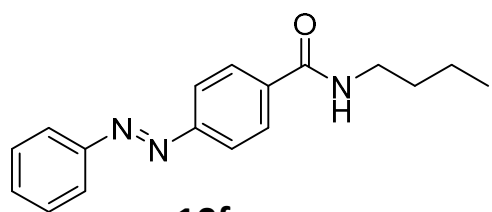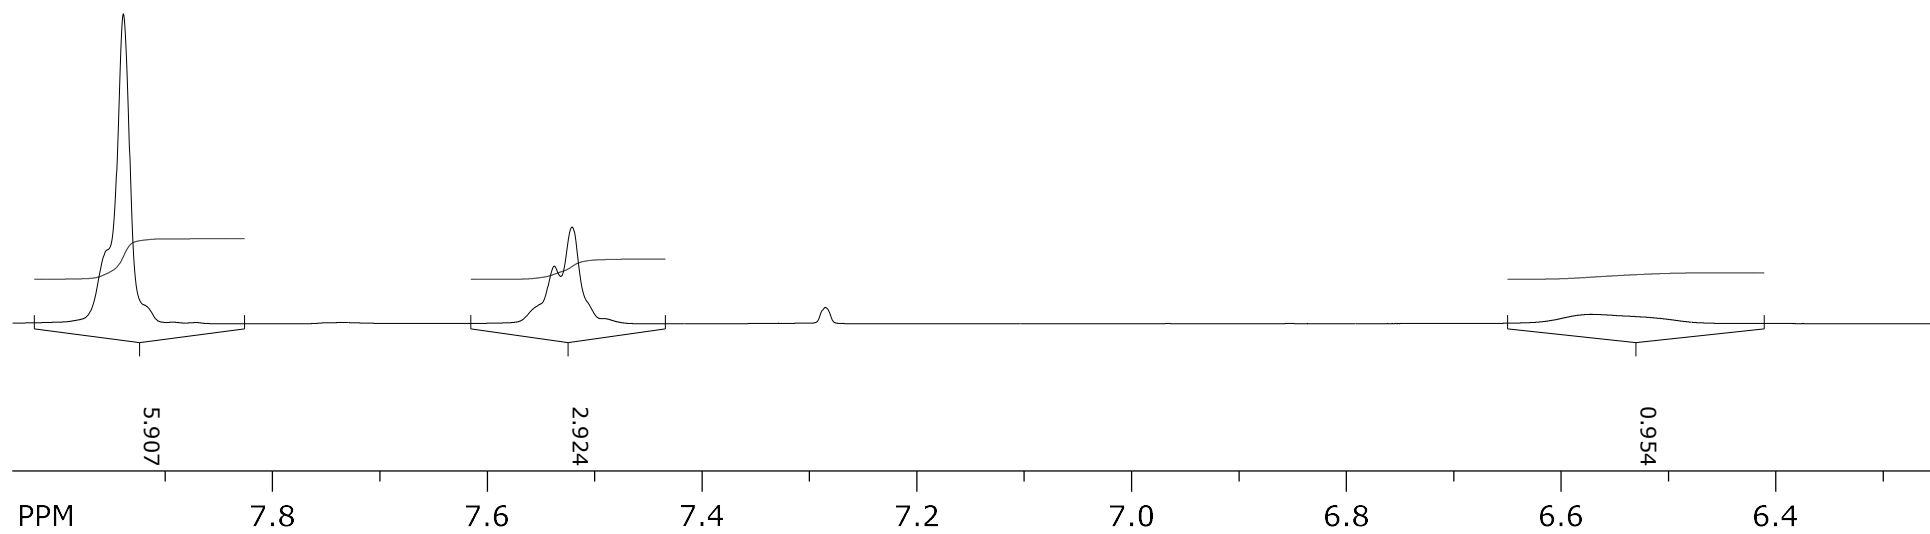

SpinWorks 4: RP 1313 A2  
PROTON CDCl3 /opt/topspin3.5pl2/nmrdata nmrsu 15

3.4622  
3.4785  
3.4948  
3.5080

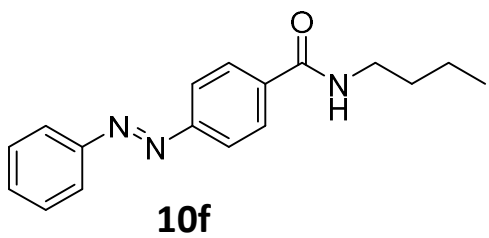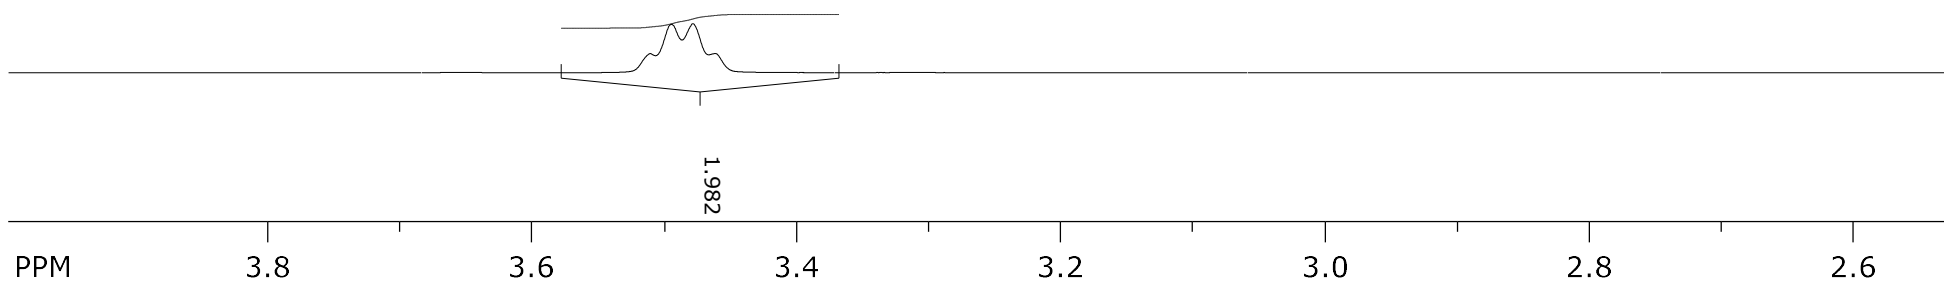

SpinWorks 4: RP 1313 A2  
PROTON CDCl3 /opt/topspin3.5pl2/nmrdata nmrsu 15

1.6010  
1.6197  
1.6381  
1.6551  
1.6750

1.4089  
1.4272  
1.4459  
1.4676

0.9593  
0.9774  
0.9957

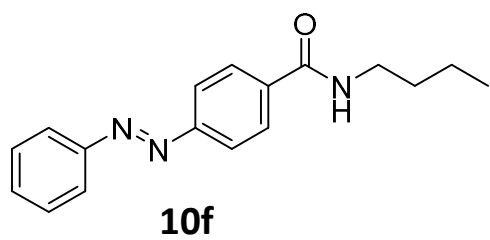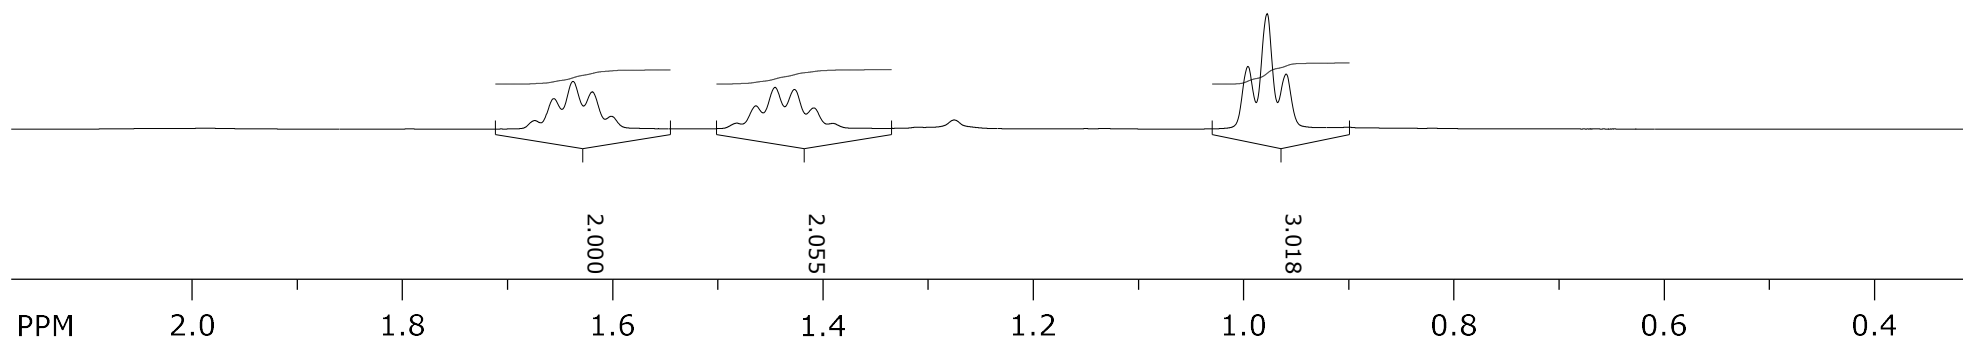

SpinWorks 4: RP 1313 A2  
PROTON CDCl3 /opt/topspin3.5pl2/nmrdata nmrsu 15

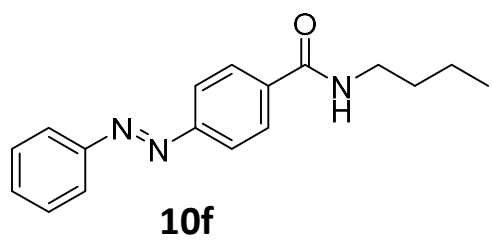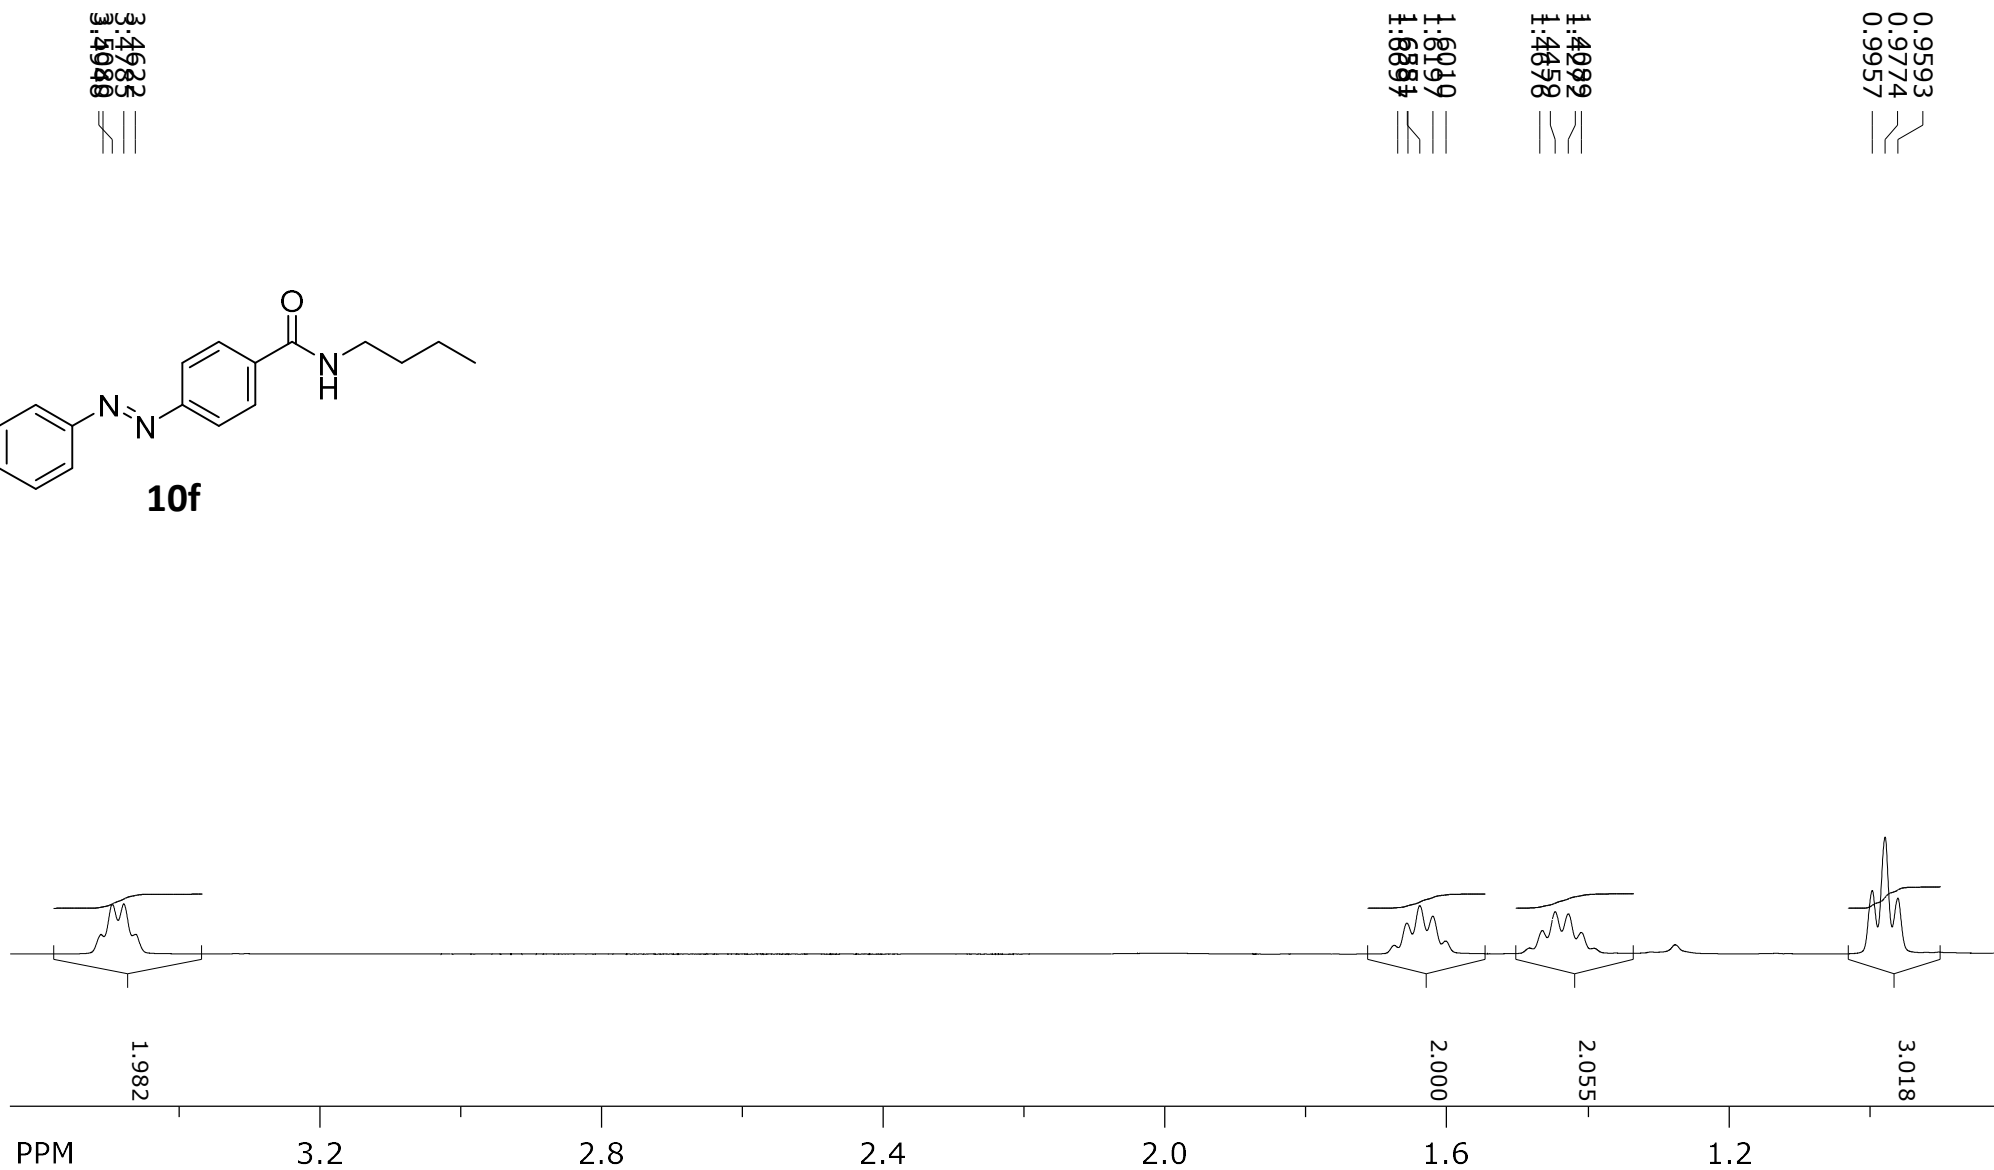

SpinWorks 4: RP 1313 A2  
C13CPD CDCl3 /opt/topspin3.5pl2/nmrdata nmrsu 15

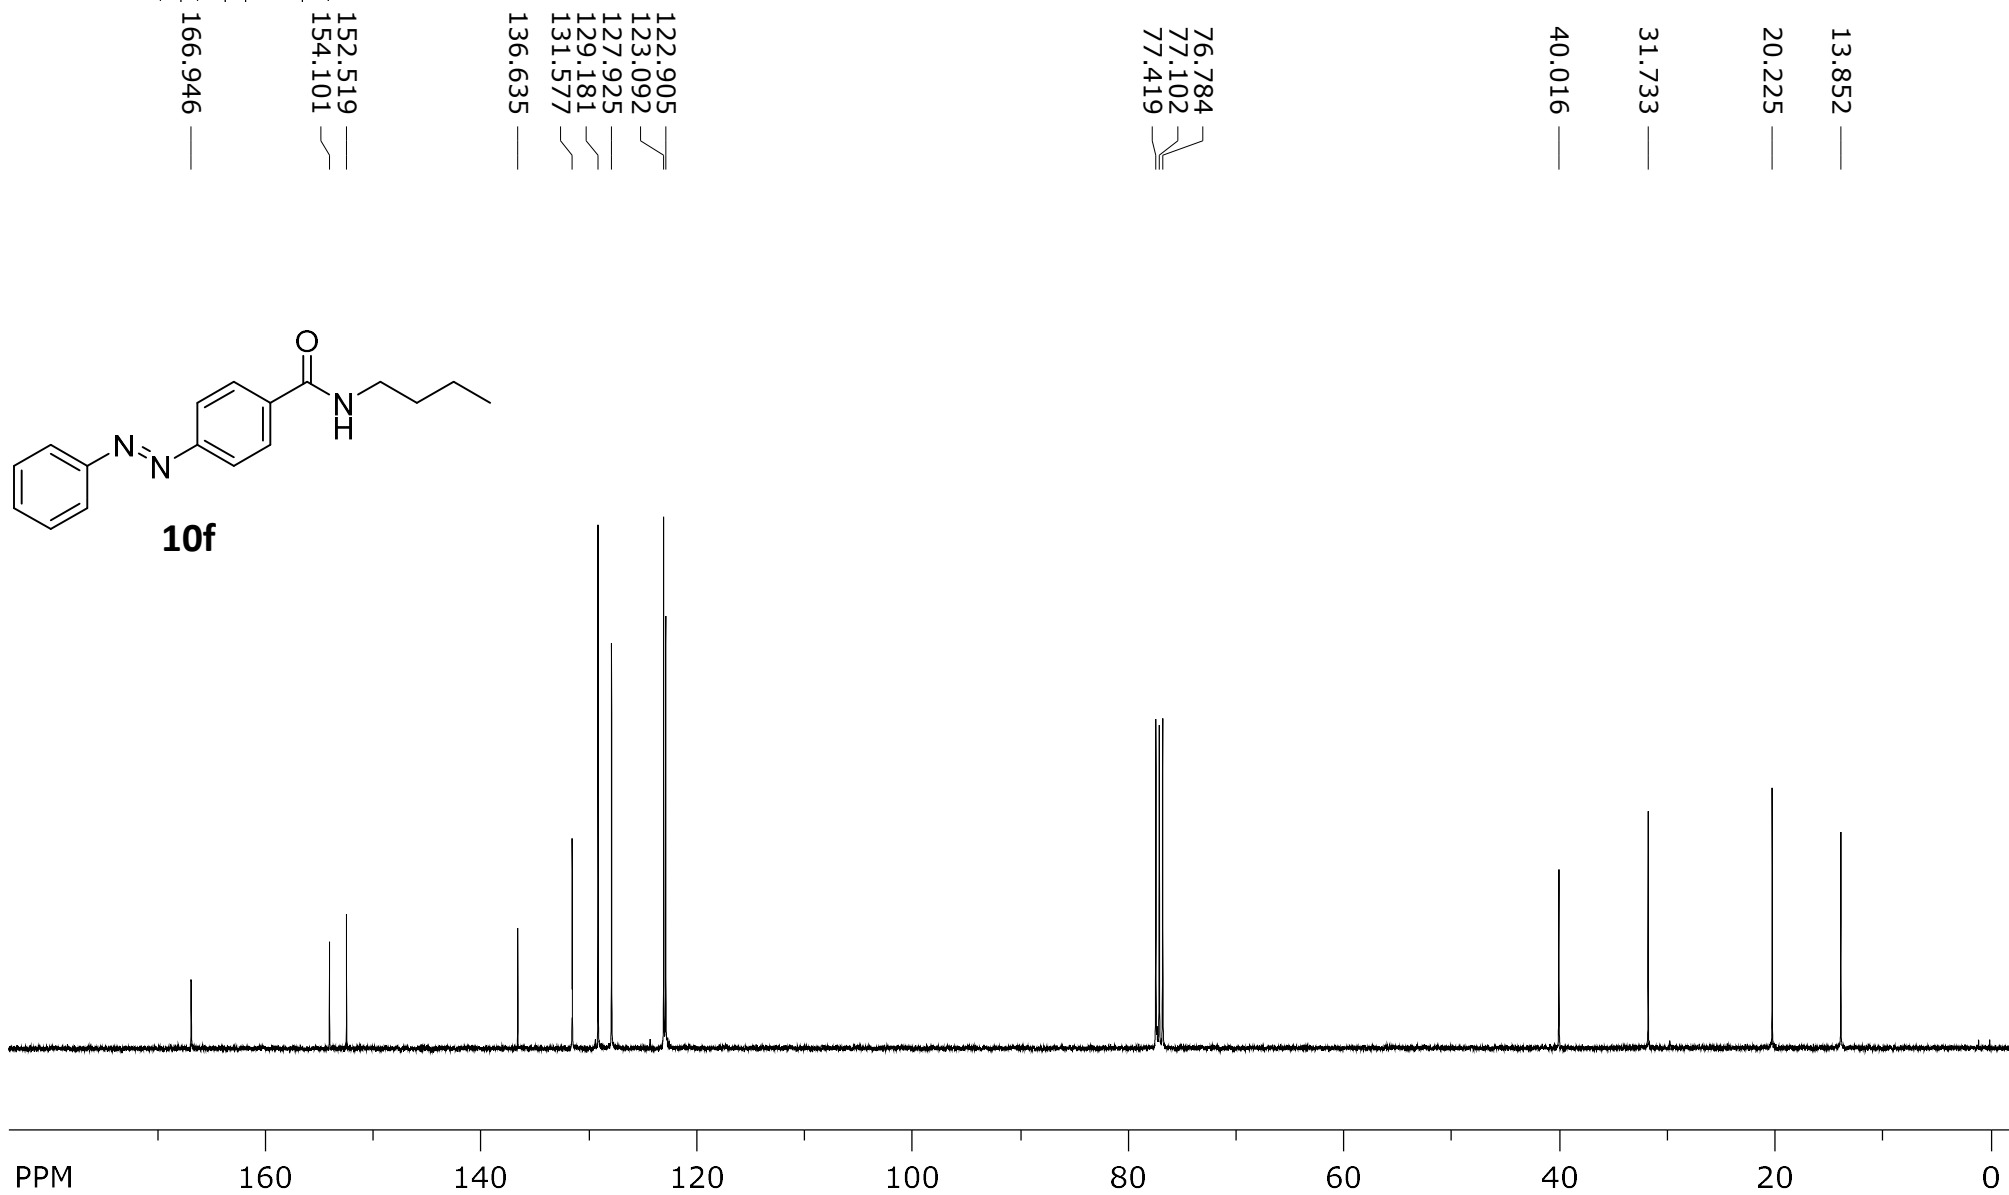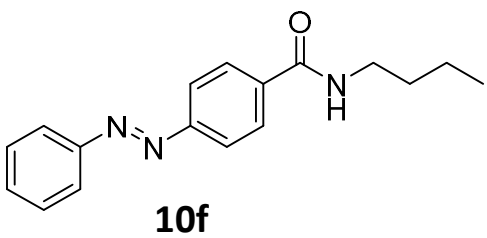

SpinWorks 4: SAB170701  
1H\_8scan DMSO {D:\Spectra} nmr 50

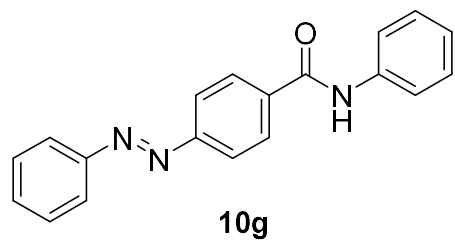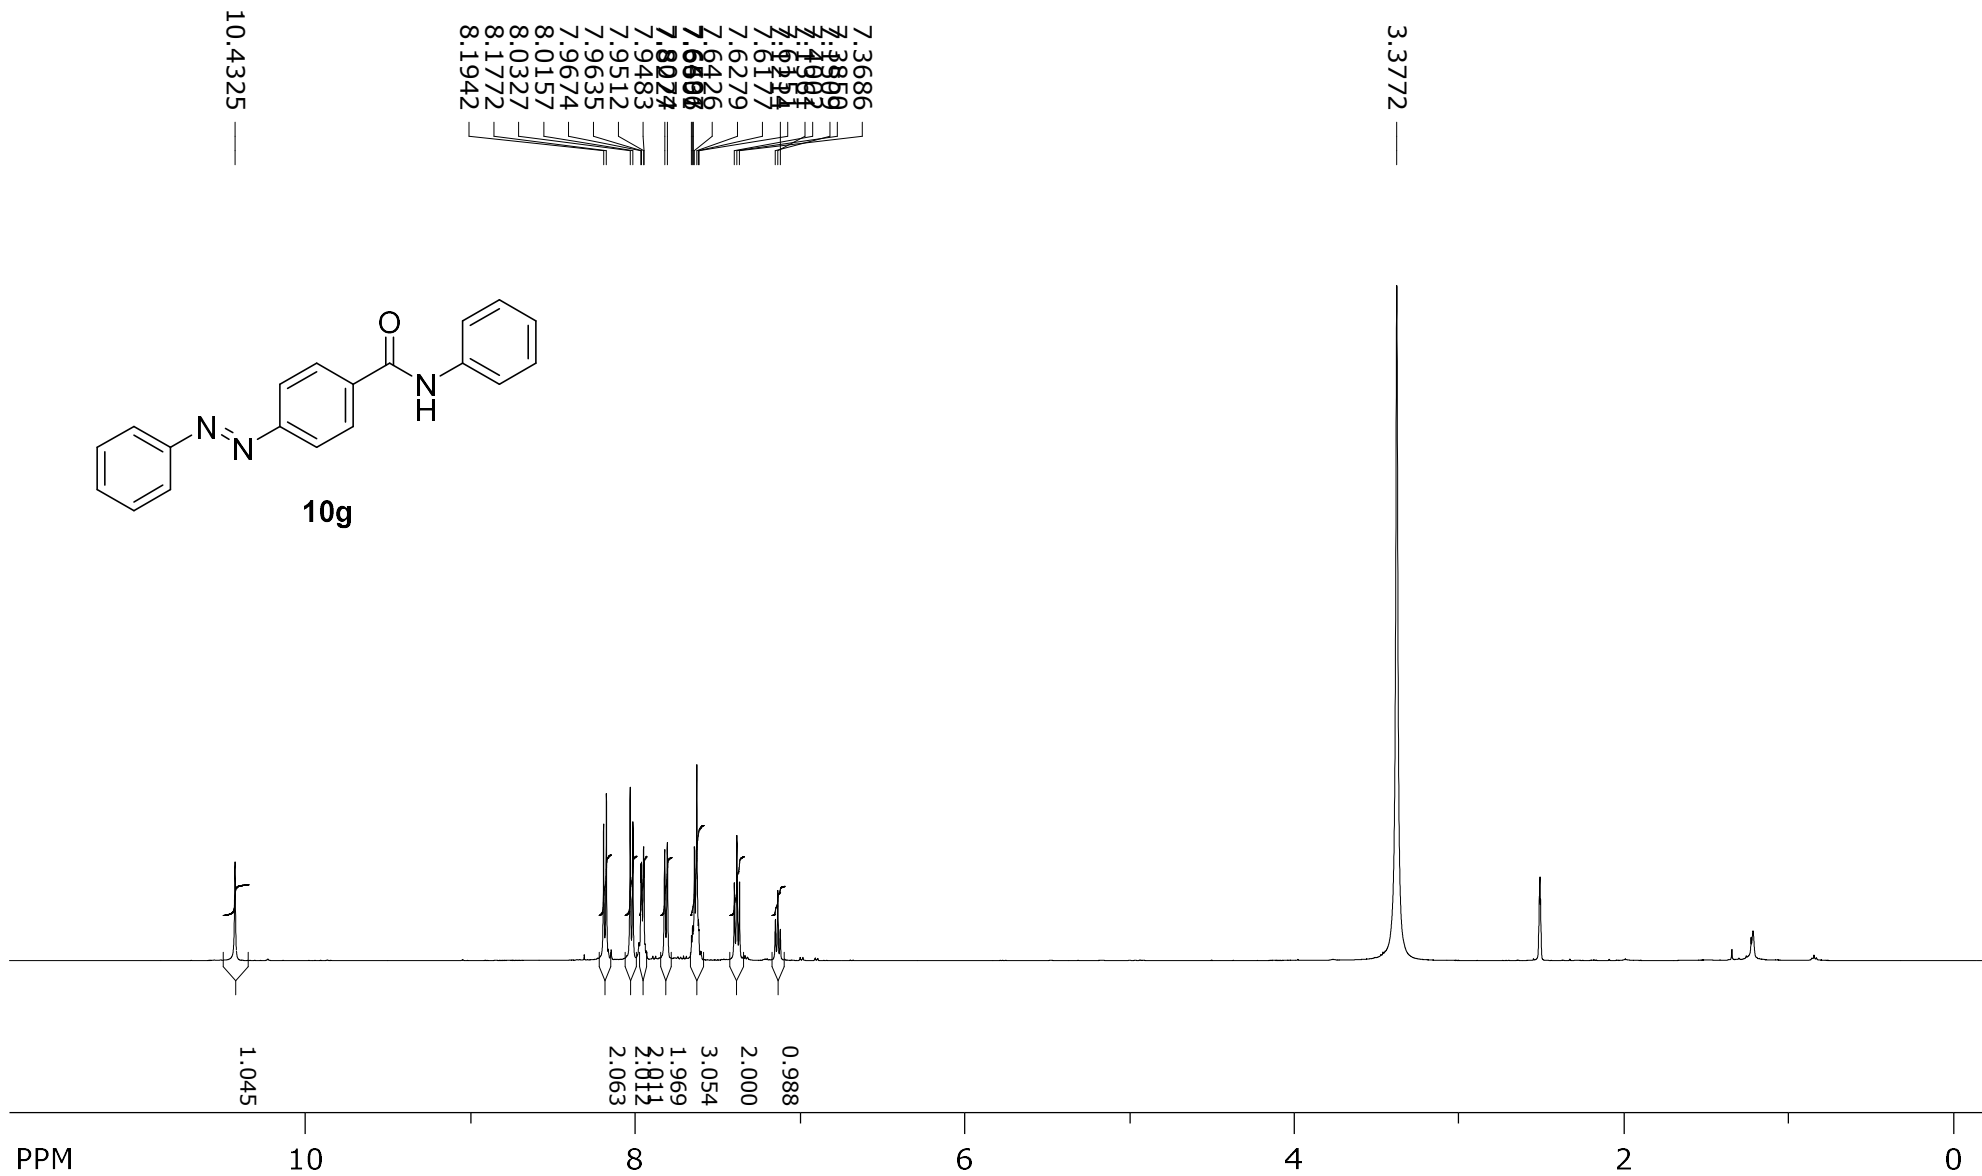



SpinWorks 4: SAB170701  
1H\_8scan DMSO {D:\Spectra} nmr 50

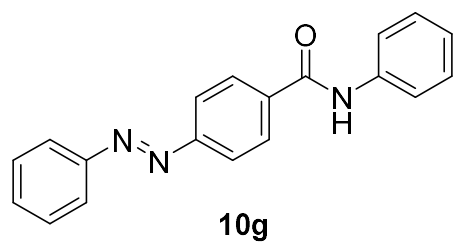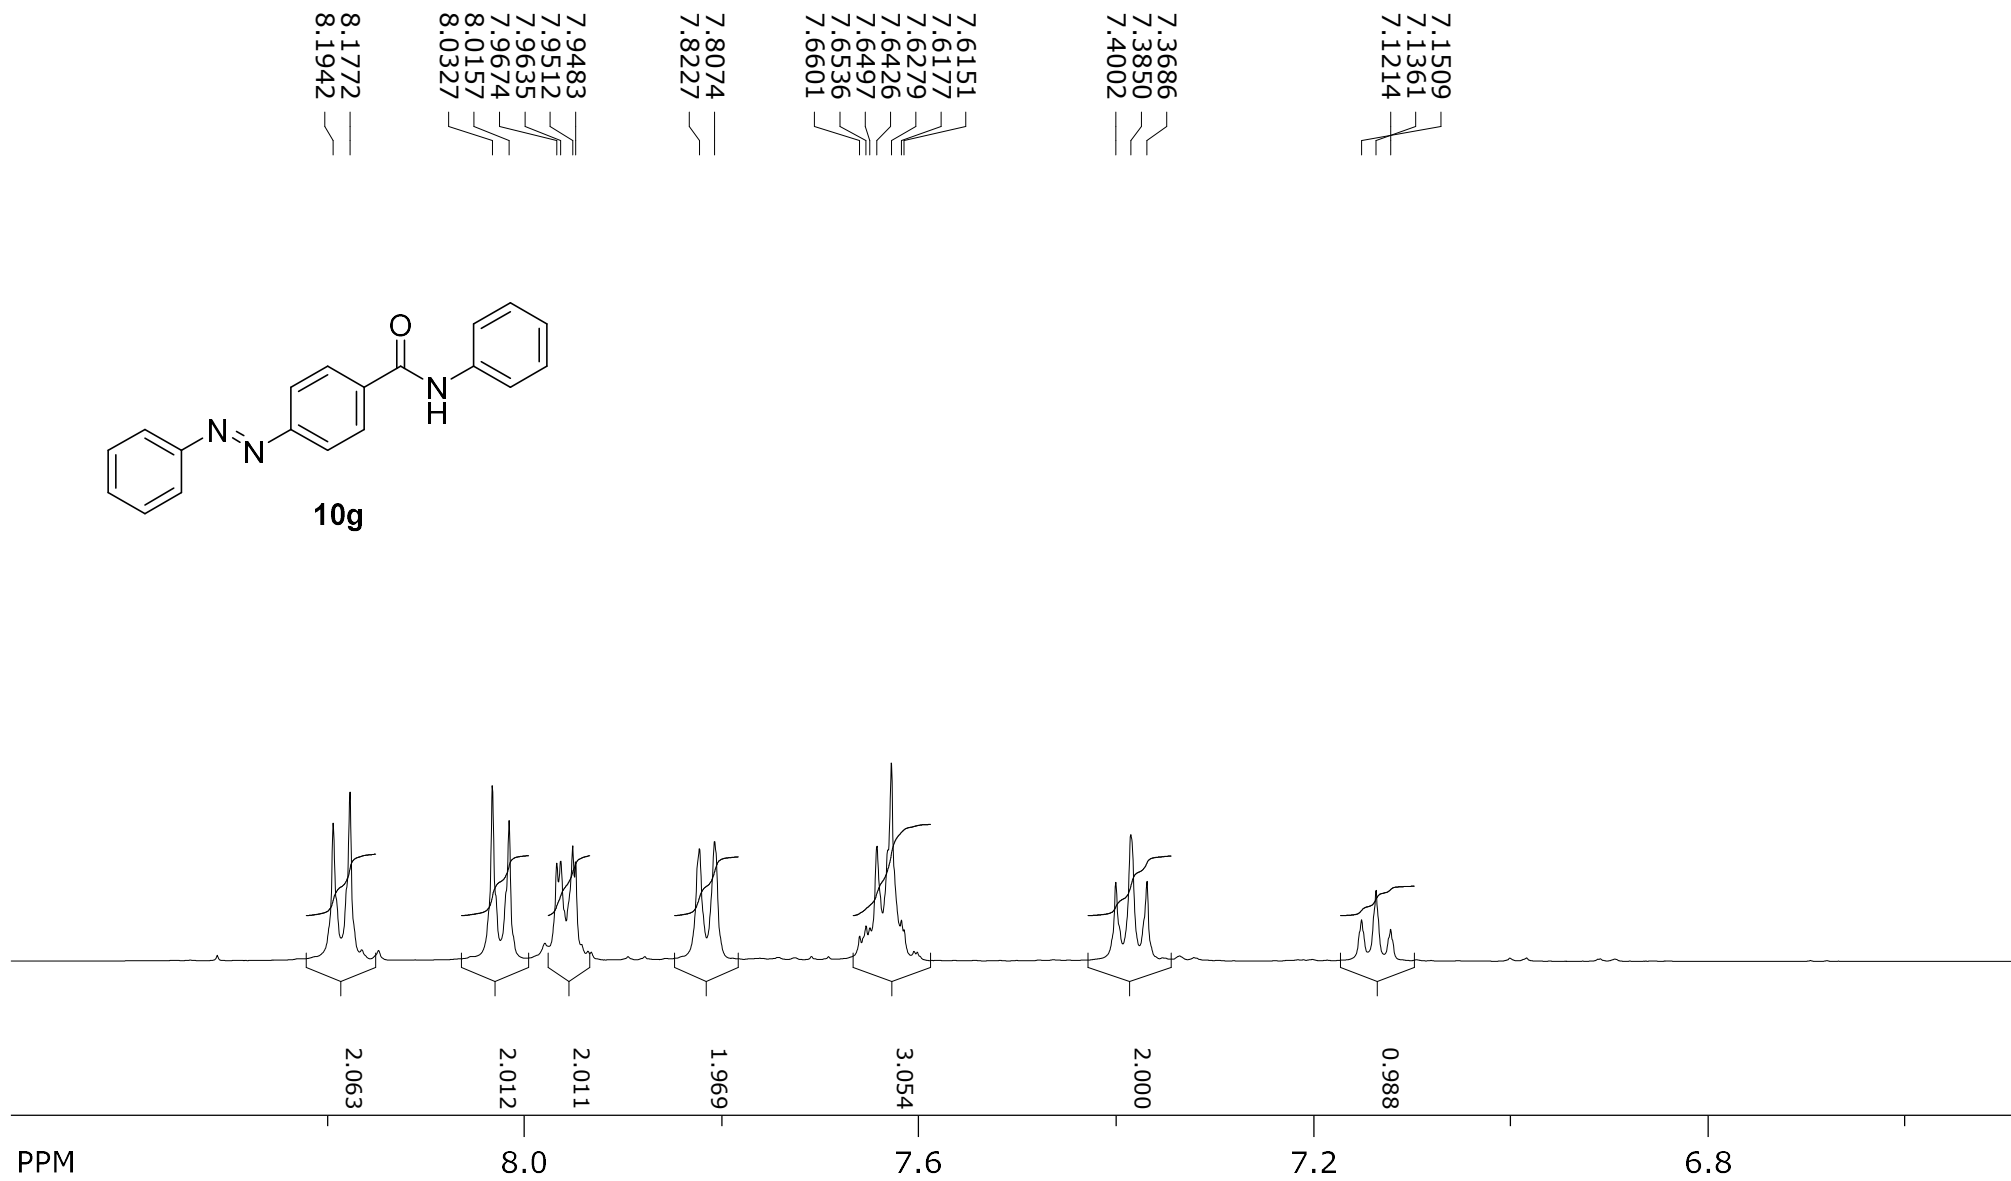

SpinWorks 4: SAB170701  
C13CPD DMSO {D:\Spectra} nmr 50

165.216

152.407  
153.947

120.958  
122.888  
123.267  
124.372  
129.136  
129.516  
130.050  
132.560  
137.559  
139.472

39.477  
39.644  
39.811  
39.978  
40.145  
40.312  
40.479

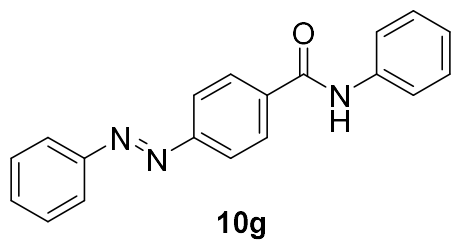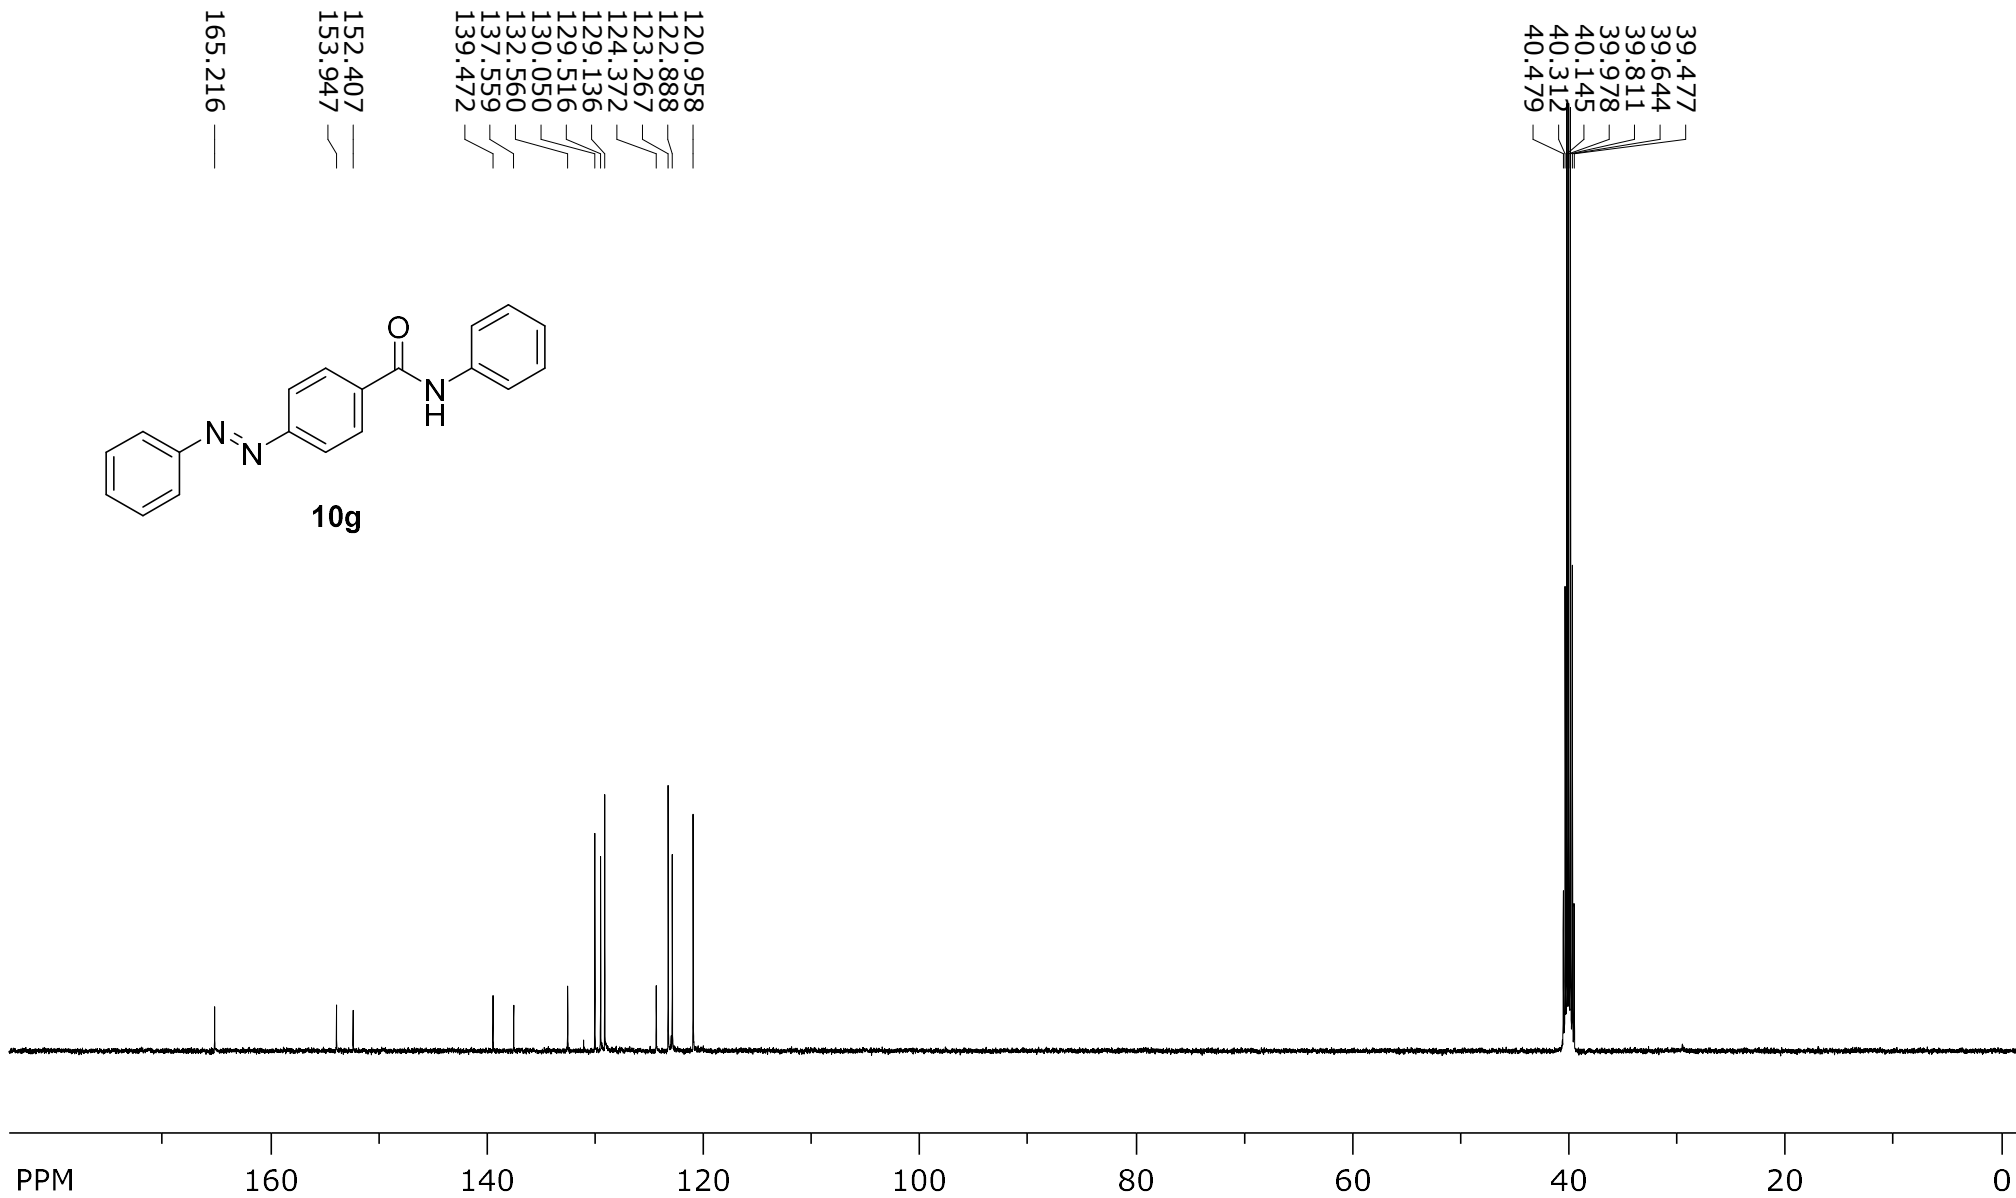

SpinWorks 4: RP 1265  
PROTON CDCl3 /opt/topspin3.5pl2/nmrdata nmrsu 56

9.9579  
8.6640  
8.6742  
8.7946  
8.8125  
8.1275  
8.0994  
7.9351  
7.9156  
7.5723  
7.5521  
7.5235  
7.3674  
7.3574  
7.3474  
7.2851  
7.2702  
7.2576  
7.2536  
6.9636  
6.9428  
6.9531

2.4874

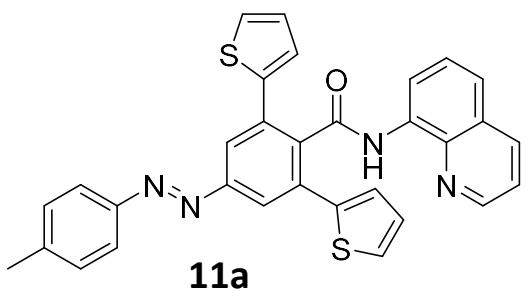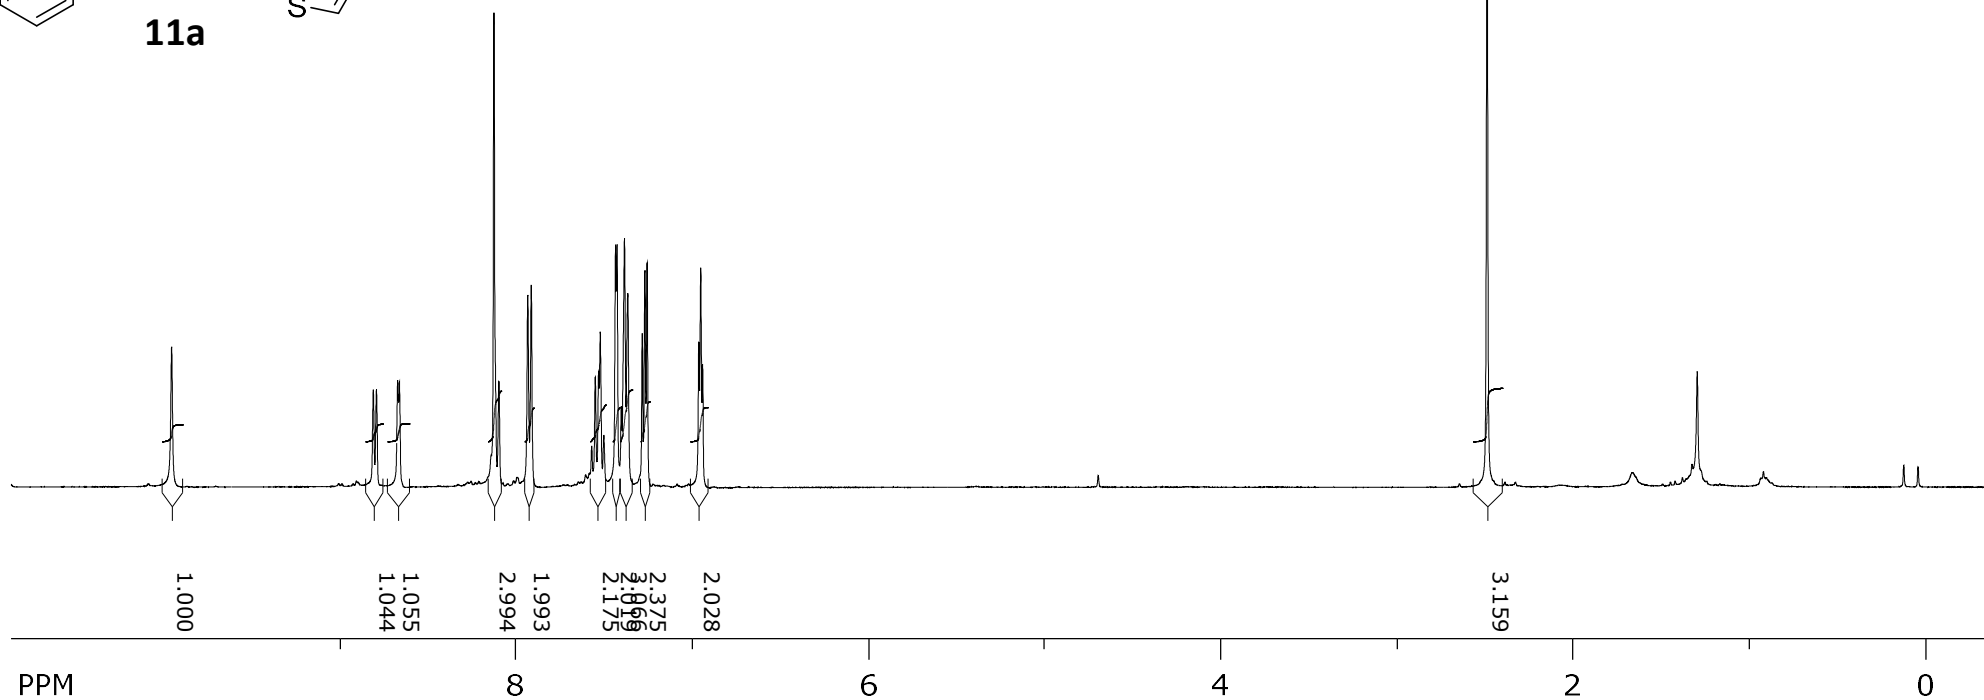

SpinWorks 4: RP 1265  
PROTON CDCl3 /opt/topspin3.5pl2/nmrdata nmrsu 56

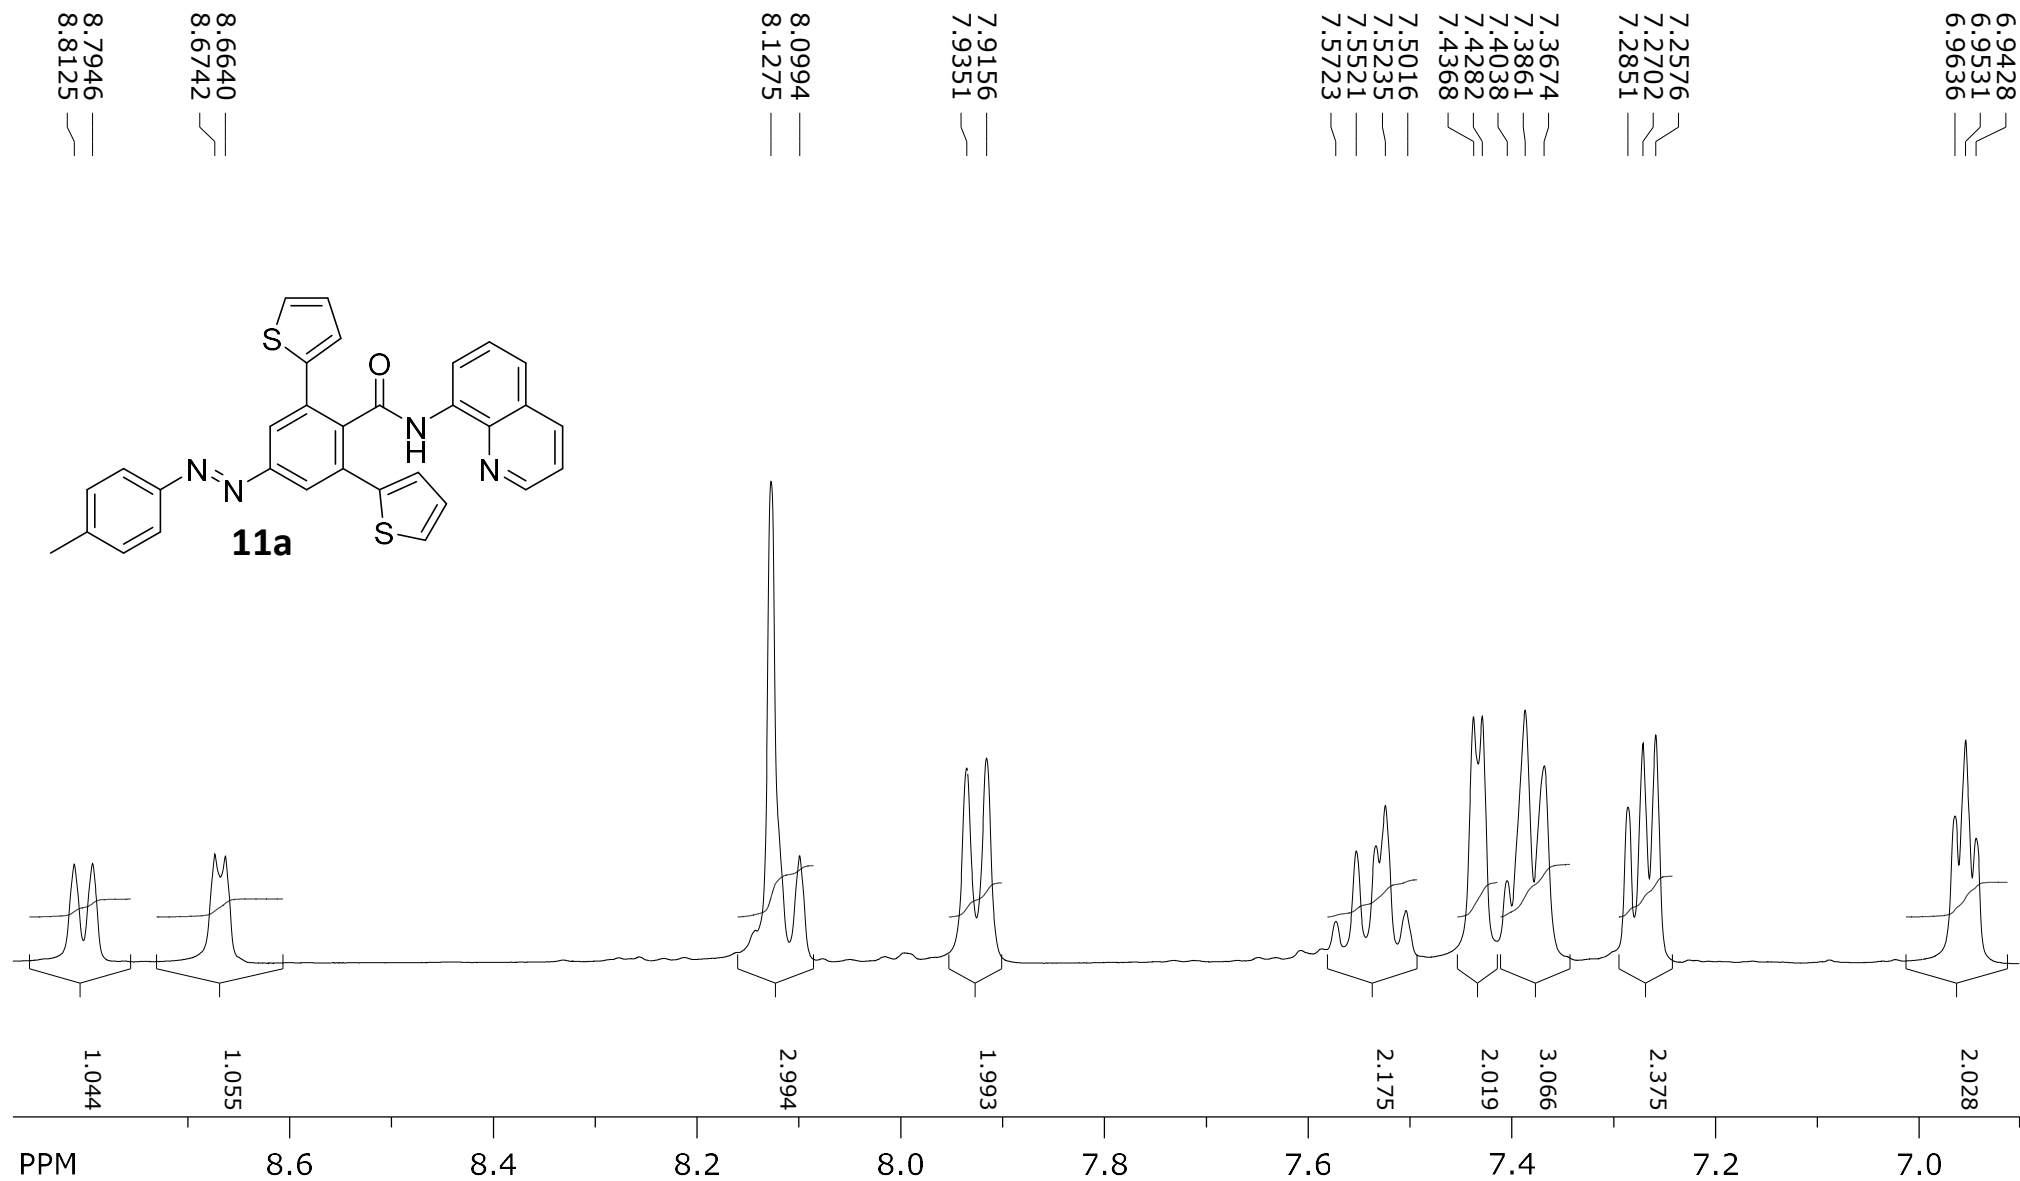

SpinWorks 4: RP 1265  
C13CPD256 CDCl3 /opt/topspin3.5pl2/nmrdata nmrsu 56

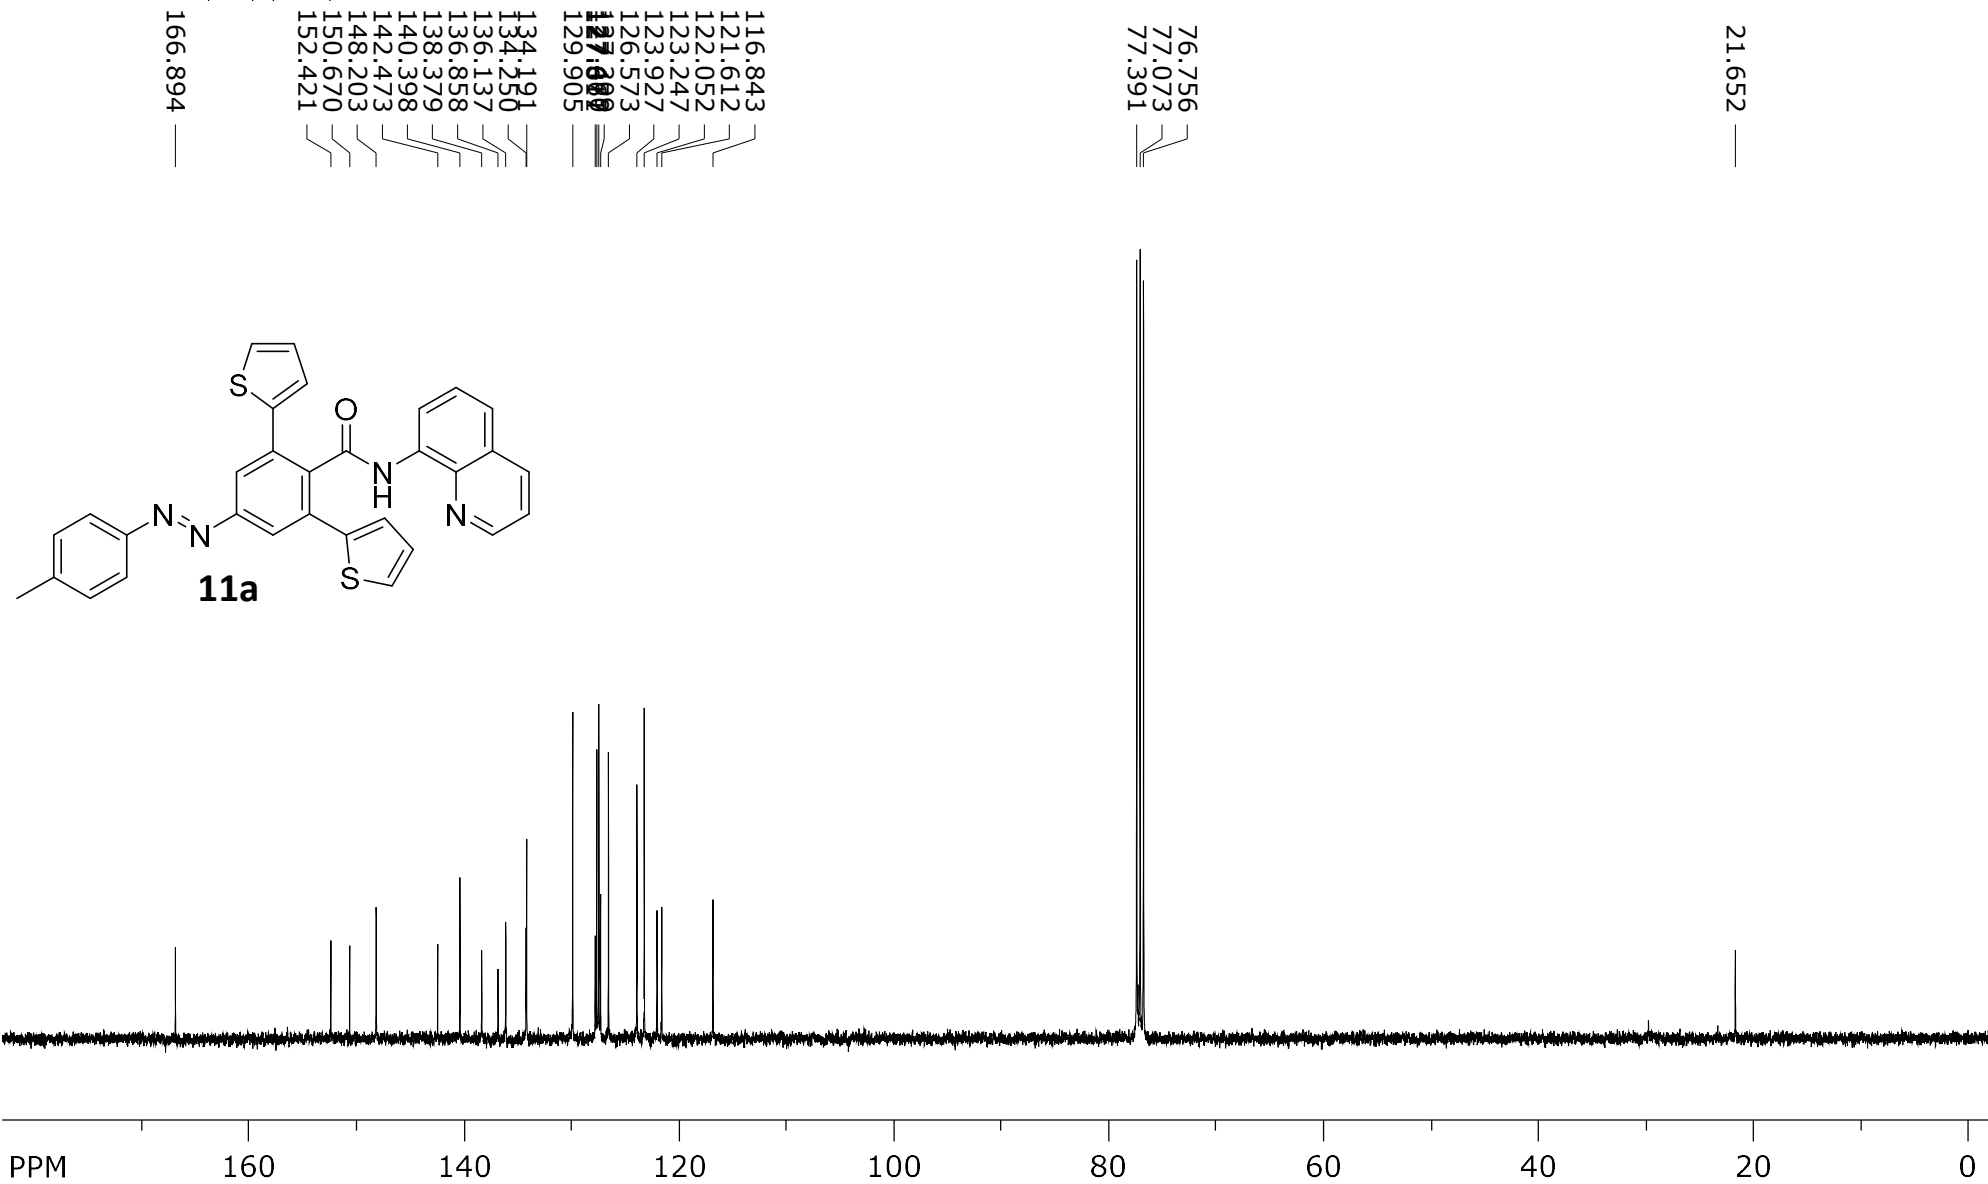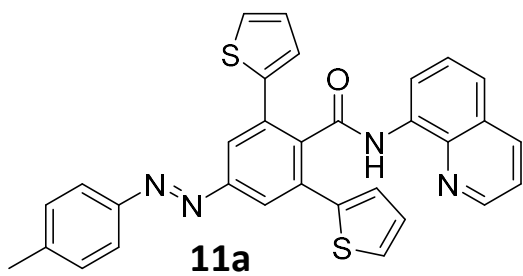

SpinWorks 4: RP 1265  
C13CPD256 CDCl3 /opt/topspin3.5pl2/nmrdata nmrsu 56

152.421 —  
150.670 —  
148.203 —  
142.473 —  
140.398 —  
138.379 —  
136.137 —  
136.858 —  
134.191 —  
134.250 —  
129.905 —  
127.811 —  
127.667 —  
127.470 —  
127.309 —  
126.573 —  
123.927 —  
123.247 —  
122.052 —  
121.612 —  
116.843 —

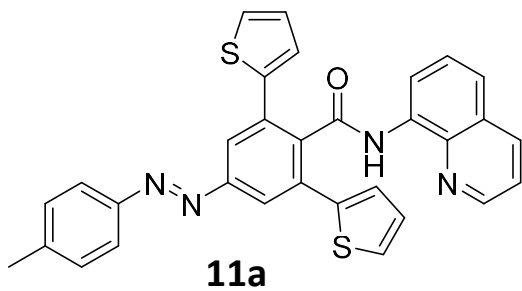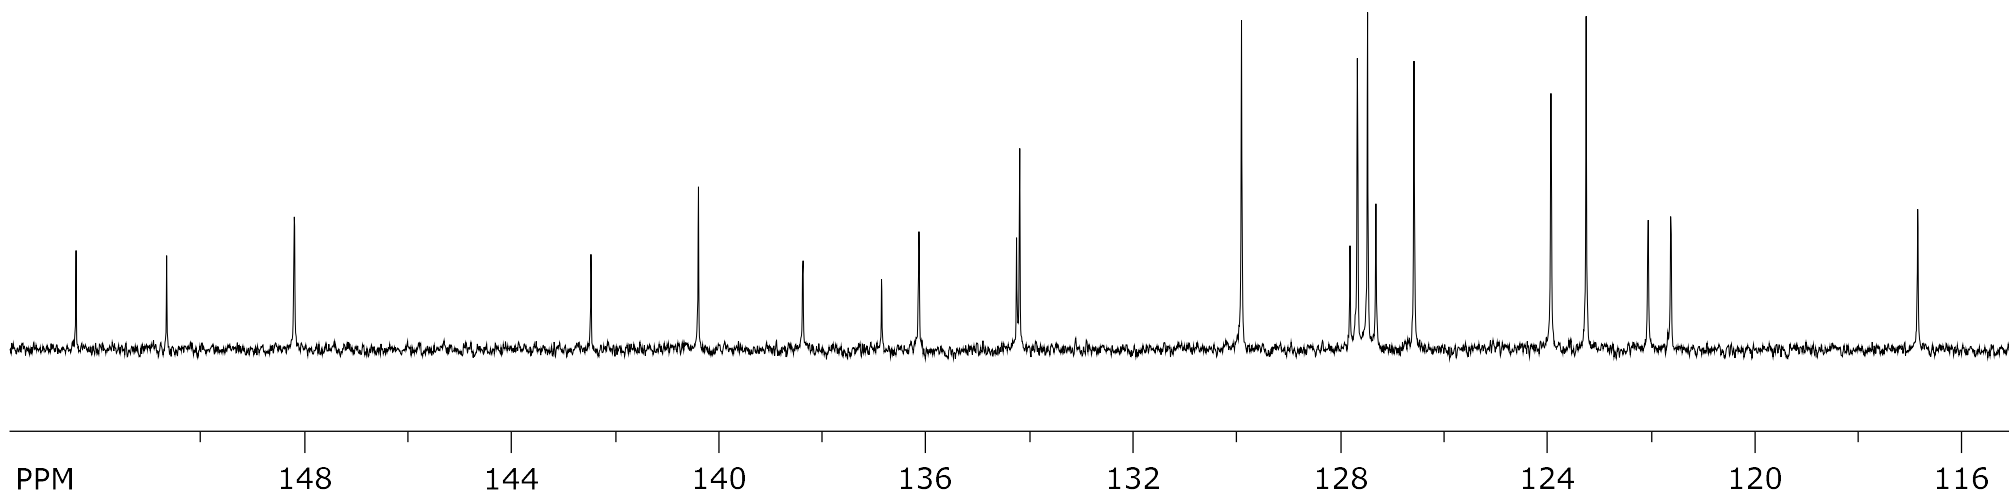



SpinWorks 4: RP 1275 B2  
PROTON\_32 CDCl3 /opt/topspin3.5pl2/nmrdata nmrsu 1

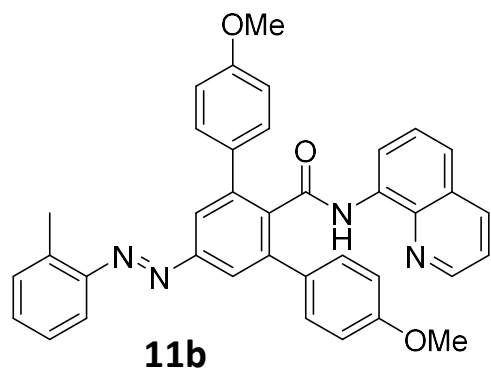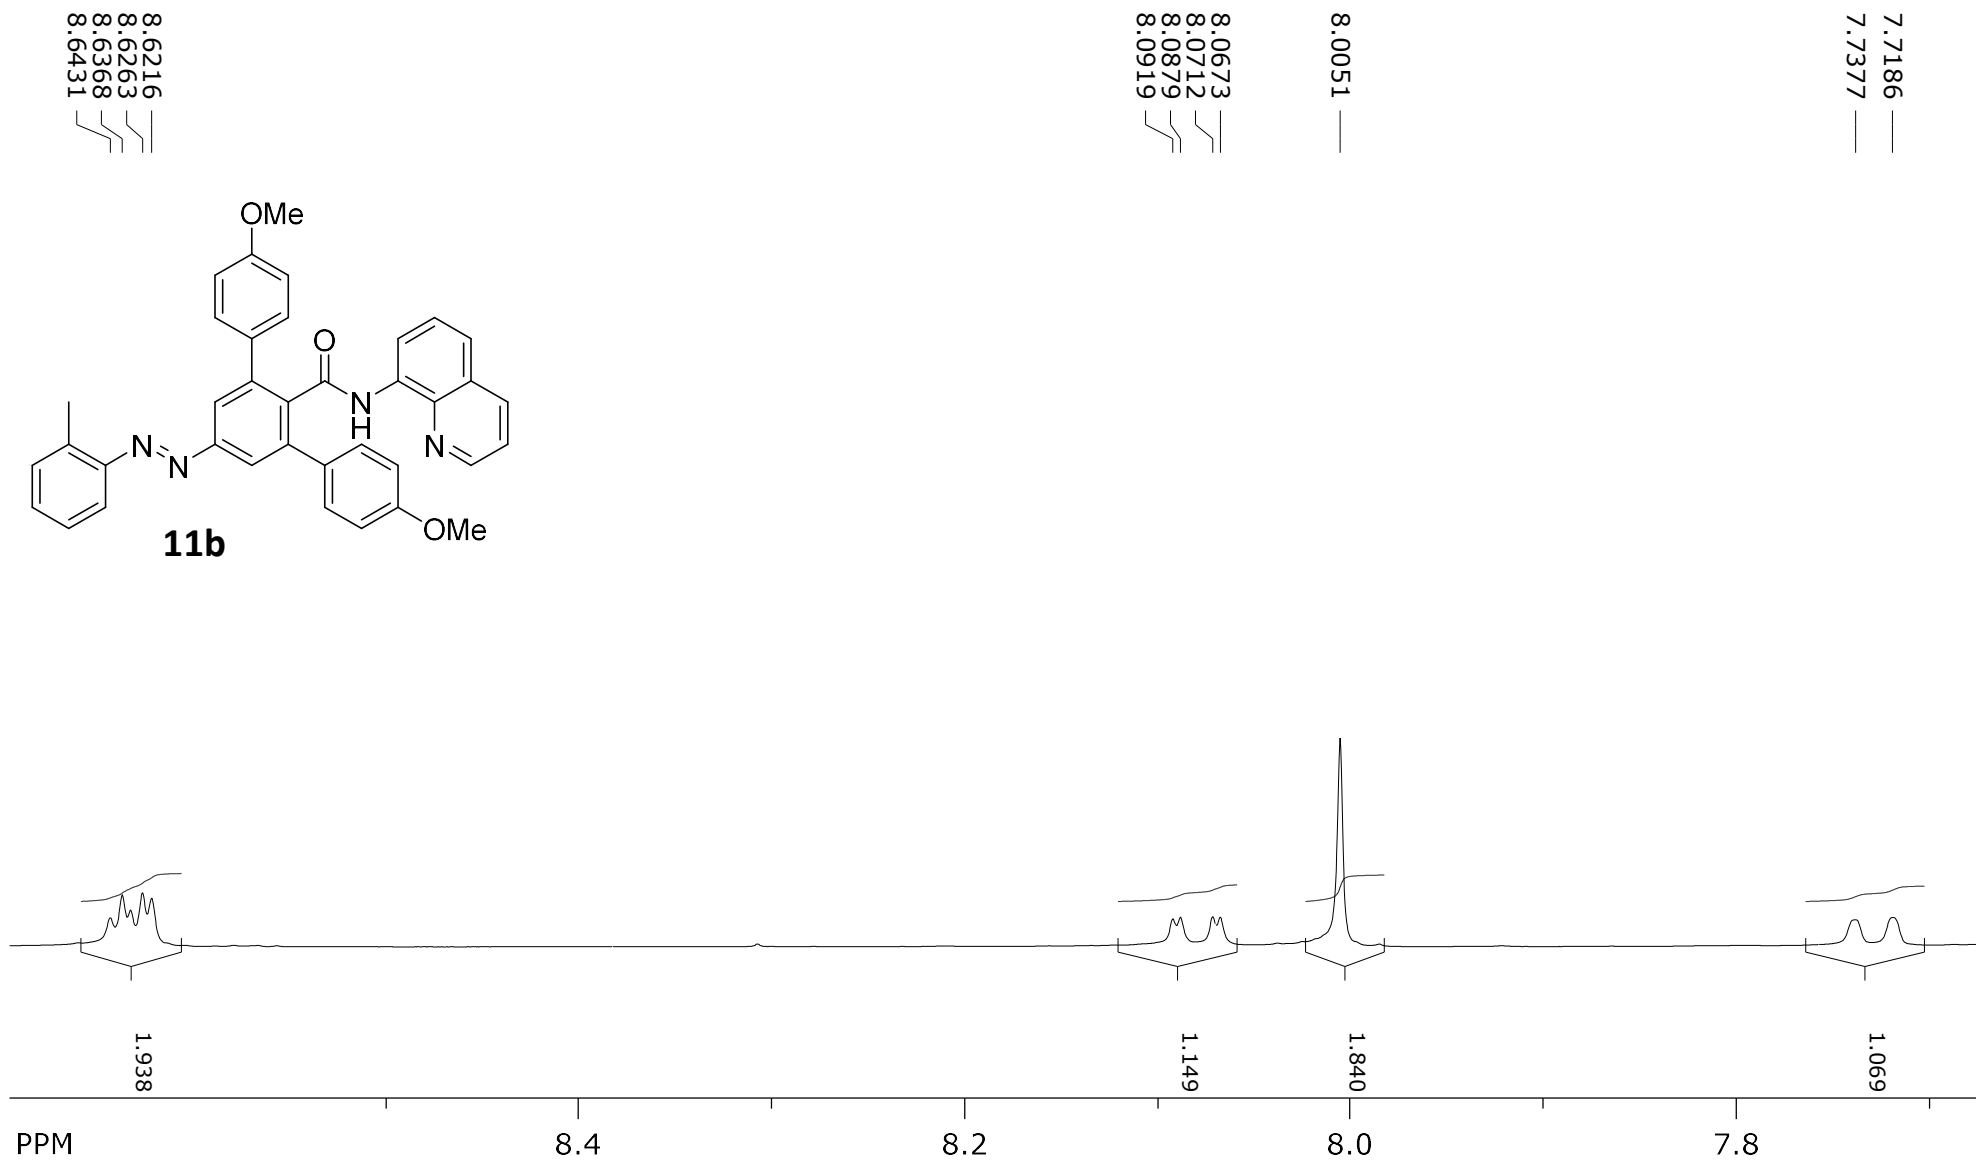



SpinWorks 4: RP 1275 B2  
PROTON\_32 CDCl3 /opt/topspin3.5pl2/nmrdata nmrsu 1

7.5887  
7.5962  
7.6011  
7.6131  
7.6180  
7.6251

7.4816  
7.4687  
7.4644  
7.4487  
7.4349  
7.4180  
7.4152  
7.4018  
7.3876  
7.3772  
7.3670  
7.3565  
7.3514  
7.3308  
7.3123  
7.2849

6.8449  
6.8521  
6.8569  
6.8692  
6.8740  
6.8812

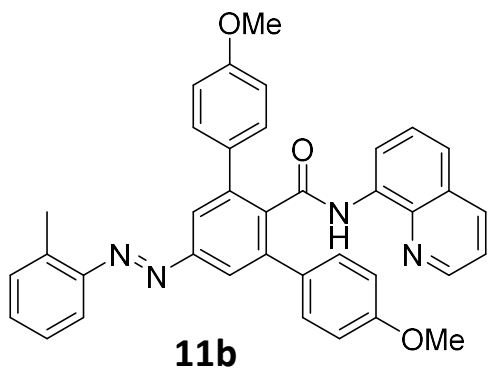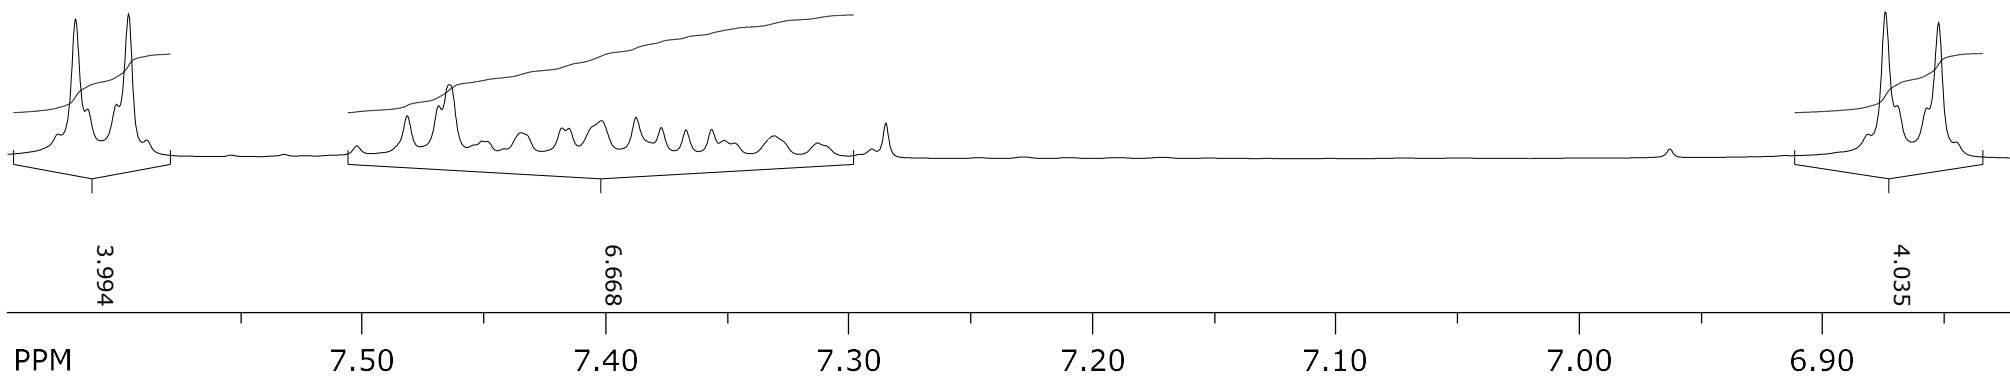

SpinWorks 4: RP 1275 B2  
C13CPD CDCl3 /opt/topspin3.5pl2/nmrdata nmrsu 1

167.458 —  
159.184 —  
152.767 —  
150.763 —  
147.983 —  
141.363 —  
138.694 —  
137.632 —  
136.071 —  
134.261 —  
132.369 —  
131.487 —  
129.907 —  
127.722 —  
127.222 —  
126.533 —  
123.356 —  
121.692 —  
121.478 —  
116.509 —  
115.495 —  
113.862 —

76.805 —  
77.122 —  
77.440 —

55.158 —

17.713 —

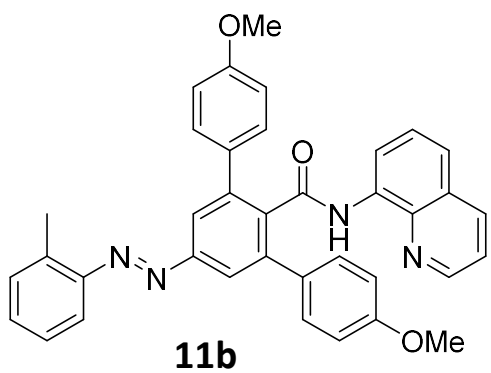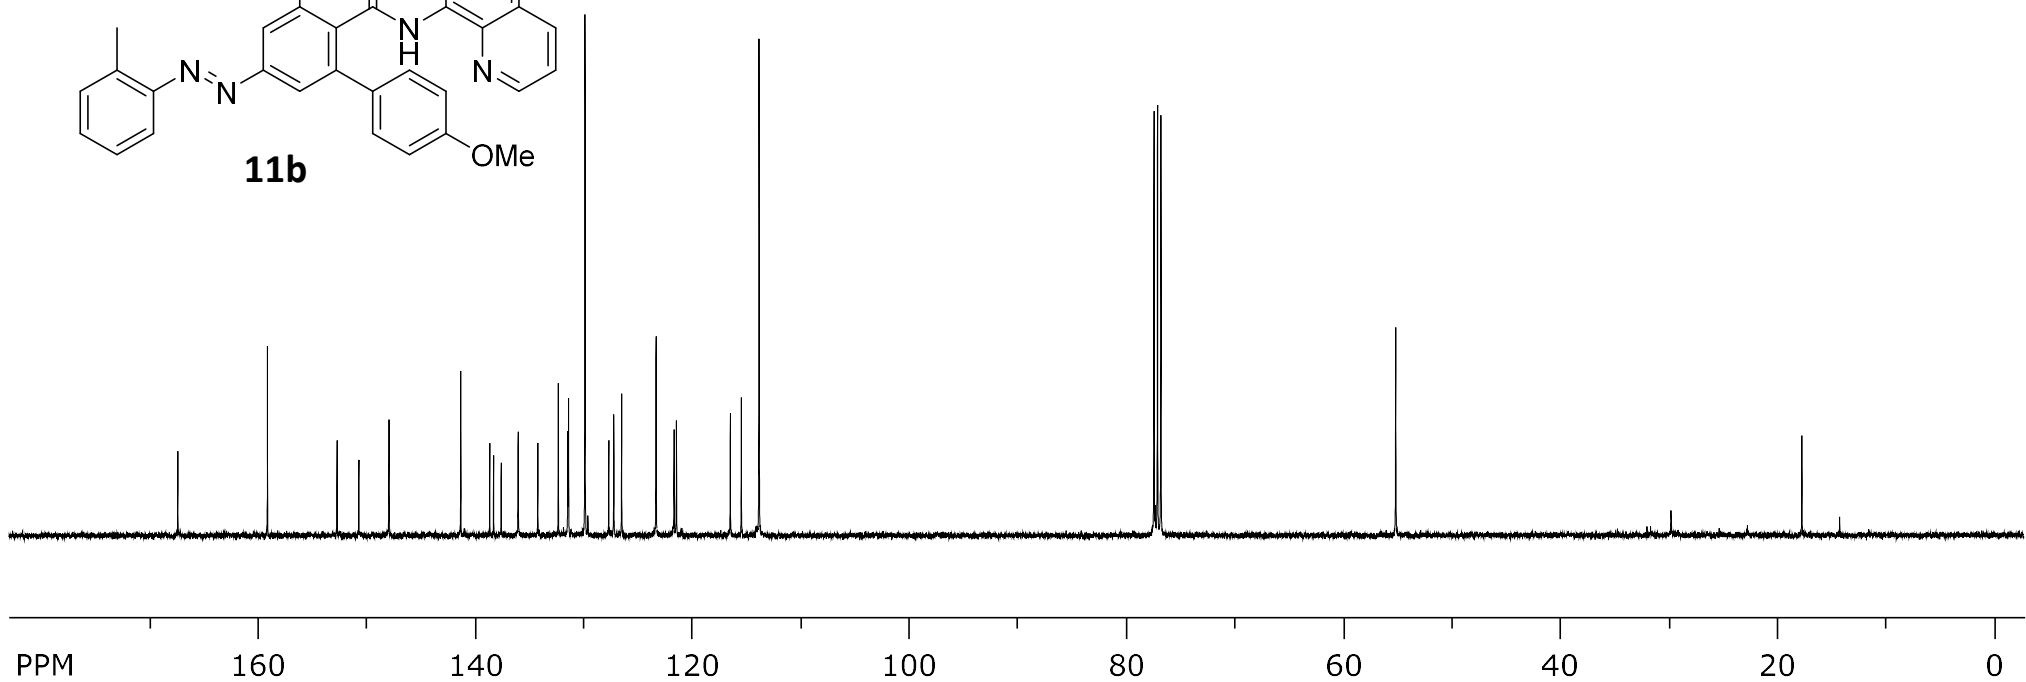

SpinWorks 4: RP 1275 B2  
C13CPD CDCl3 /opt/topspin3.5pl2/nmrdata nmrsu 1

167.458 —  
159.184 —  
152.767 —  
150.763 —  
147.983 —  
141.363 —  
138.344 —  
137.632 —  
138.694 —  
136.071 —  
134.261 —  
132.369 —  
131.493 —  
131.427 —  
129.907 —  
127.722 —  
127.255 —  
126.533 —  
123.356 —  
121.692 —  
121.478 —  
116.509 —  
115.495 —  
113.862 —

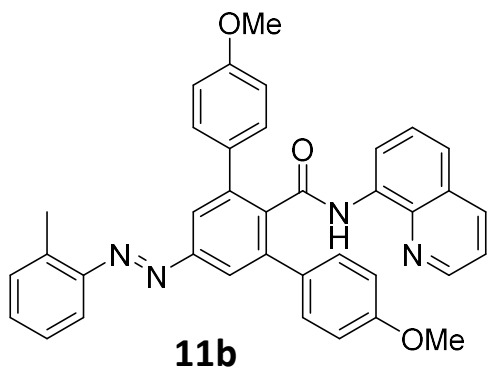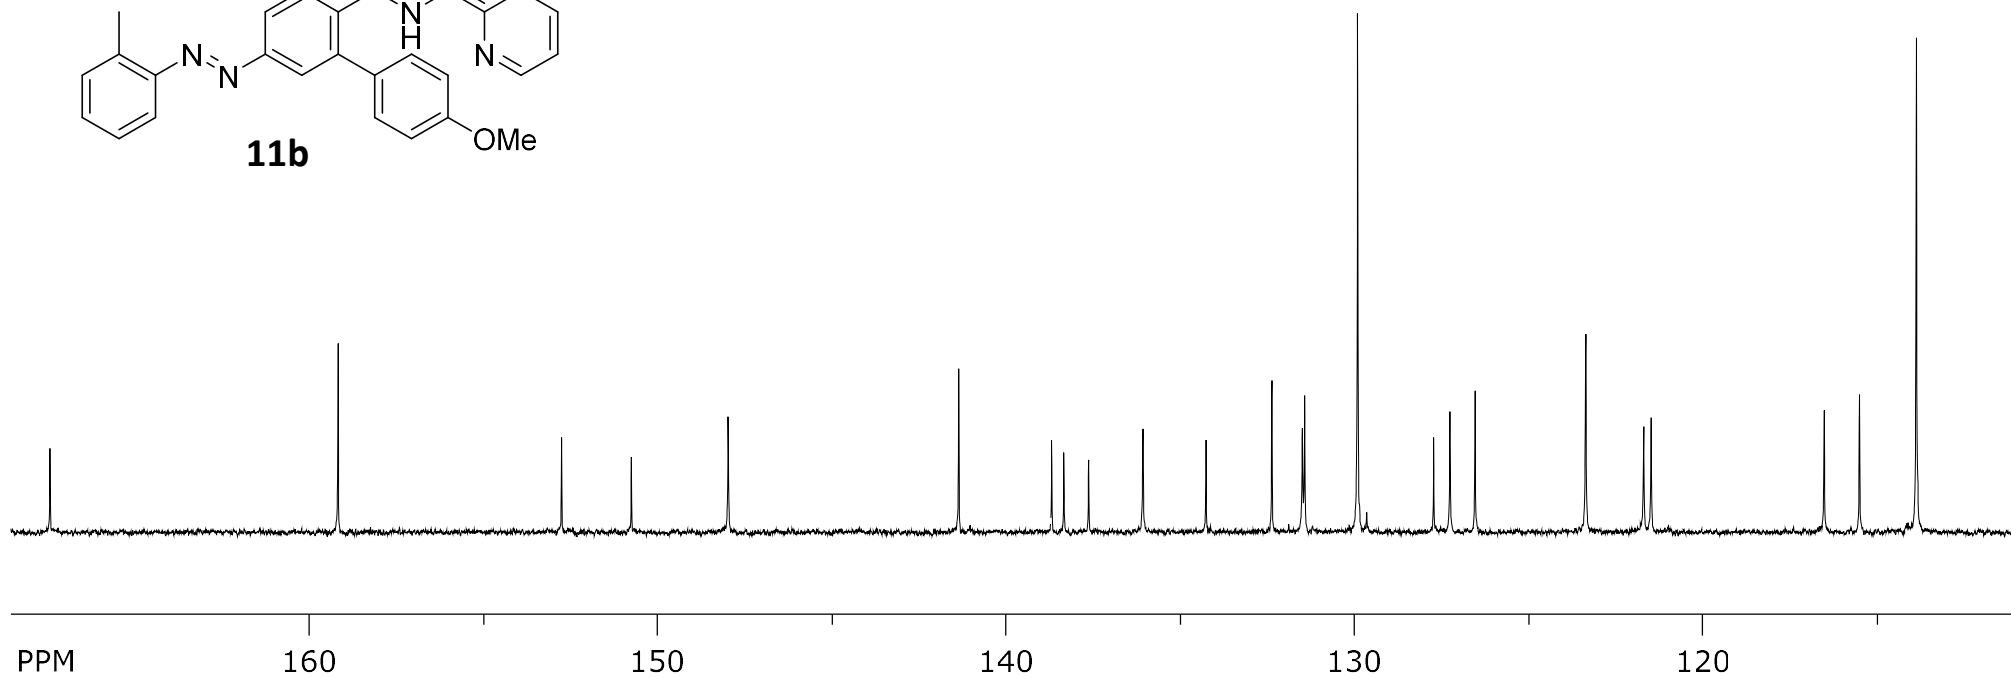

SpinWorks 4: RP 1266 REP  
PROTON CDCl3 /opt/topspin3.5pl2/nmrdata nmrsu 60

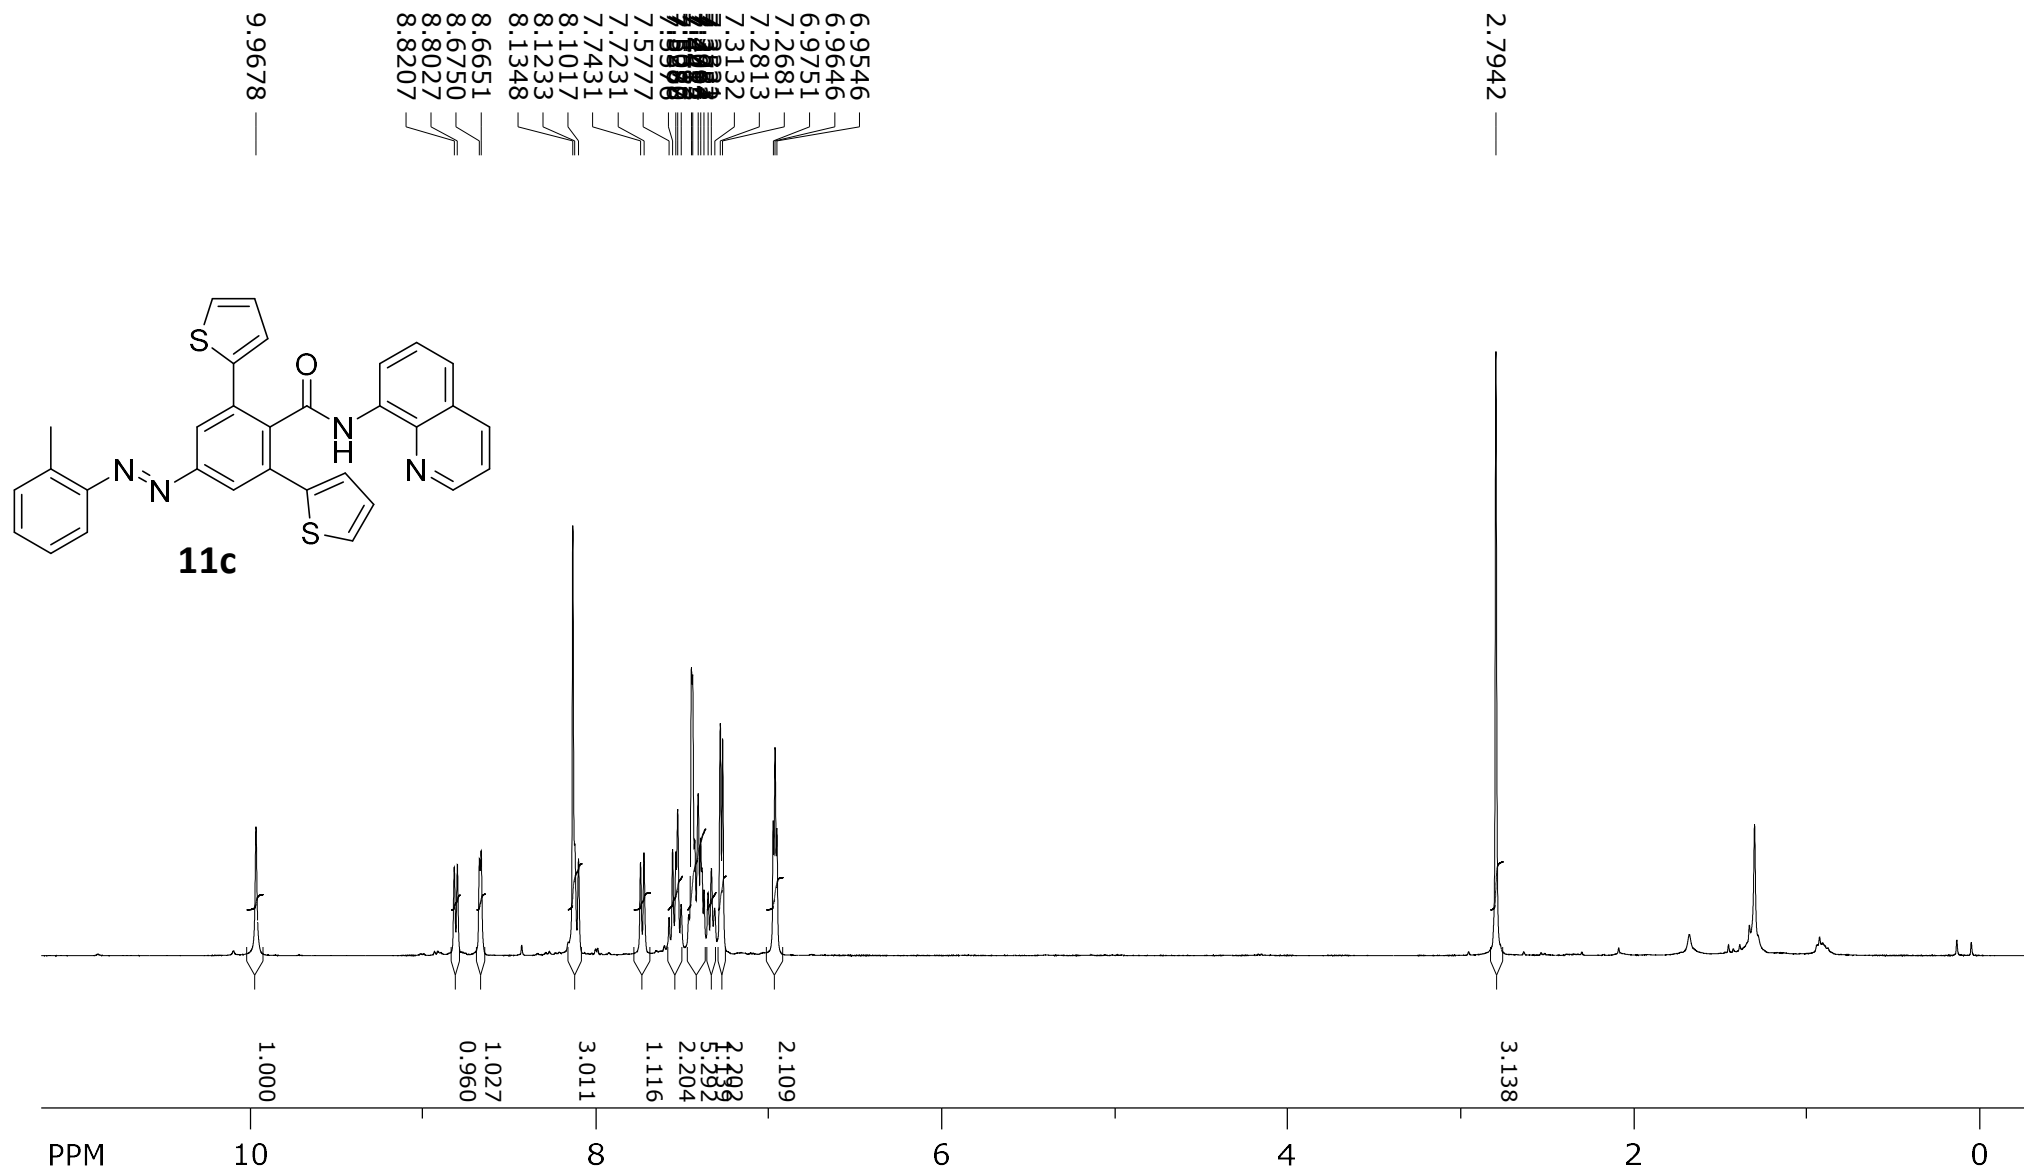

SpinWorks 4: RP 1266 REP  
PROTON CDCl3 /opt/topspin3.5pl2/nmrdata nmrsu 60

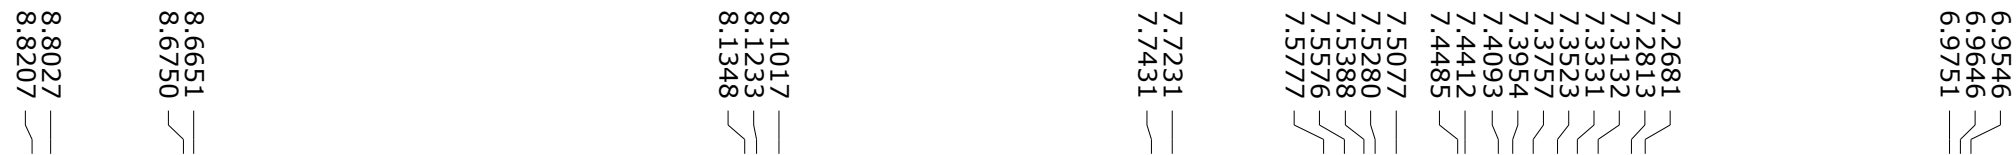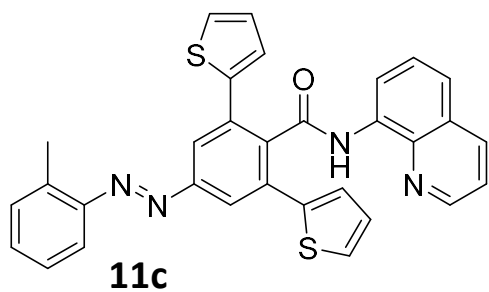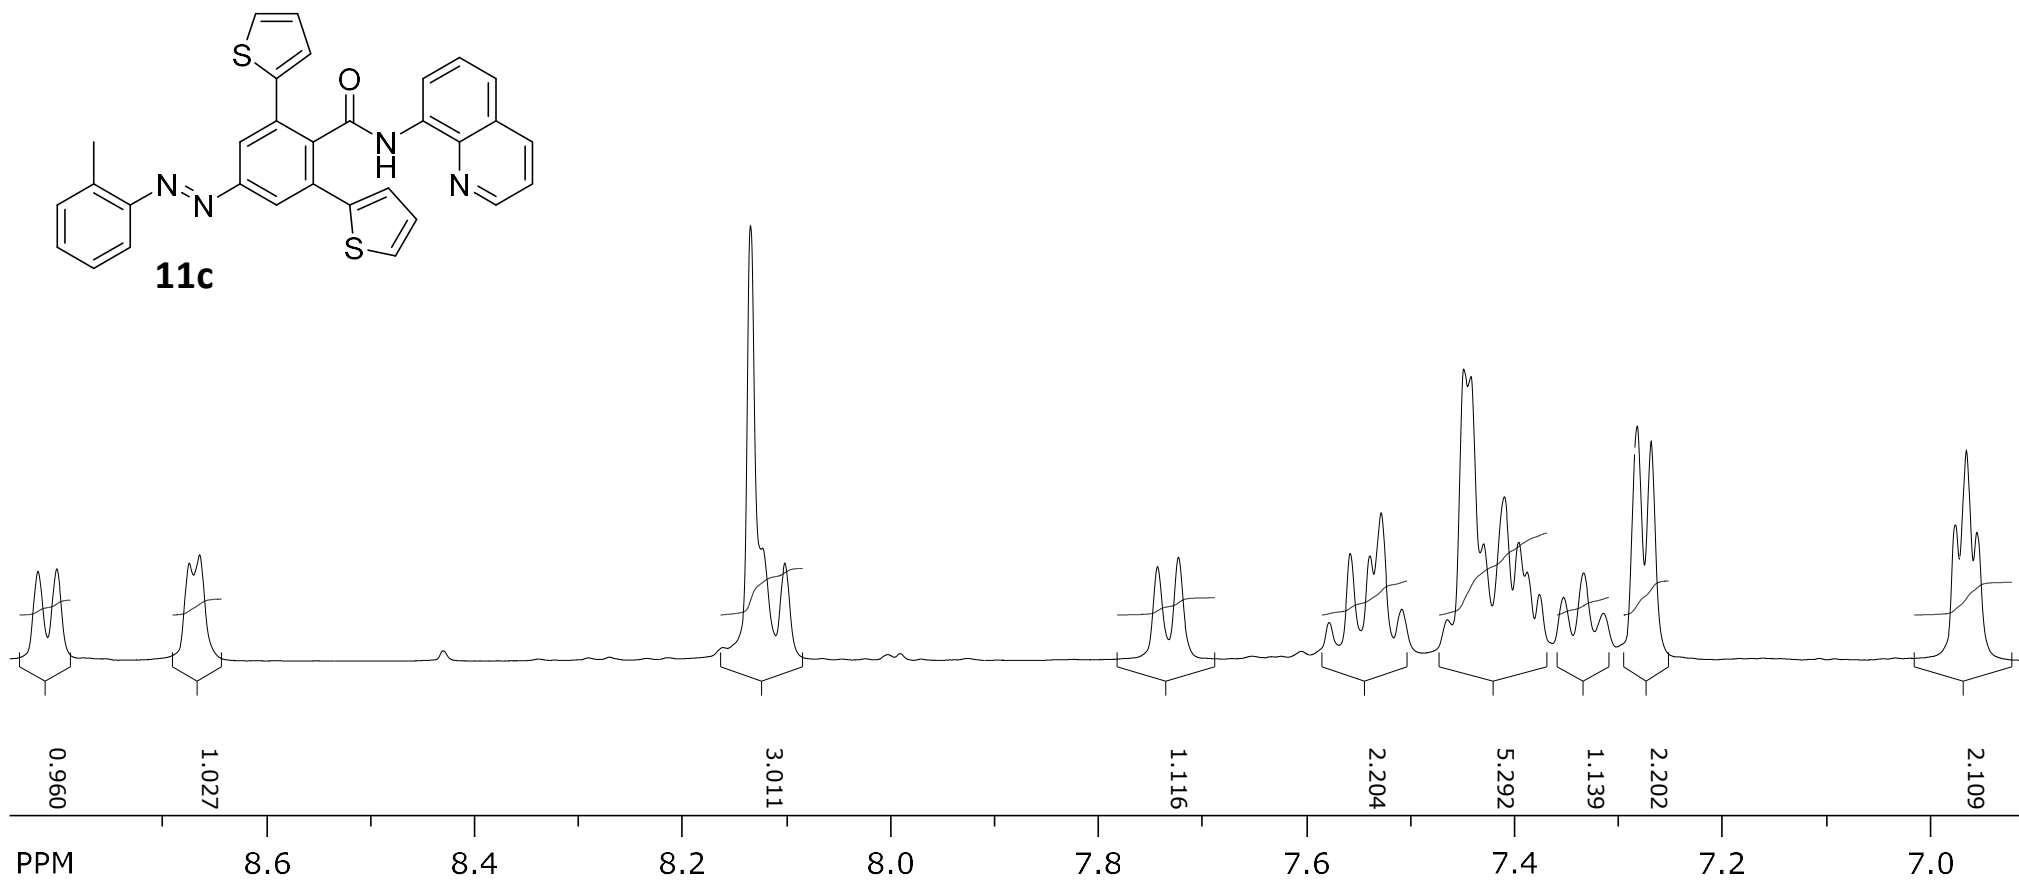

SpinWorks 4: RP 1266 REP  
C13CPD CDCl3 /opt/topspin3.5pl2/nmrdata nmrsu 60

166.862 —  
152.694 —  
150.624 —  
148.217 —  
140.407 —  
138.937 —  
136.931 —  
134.198 —  
131.745 —  
129.829 —  
127.829 —  
126.547 —  
124.070 —  
122.085 —  
121.632 —  
116.846 —  
115.501 —

76.771 —  
77.089 —  
77.406 —

17.678 —

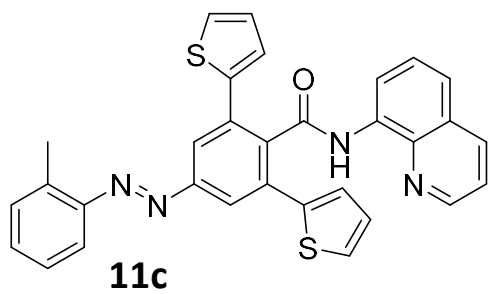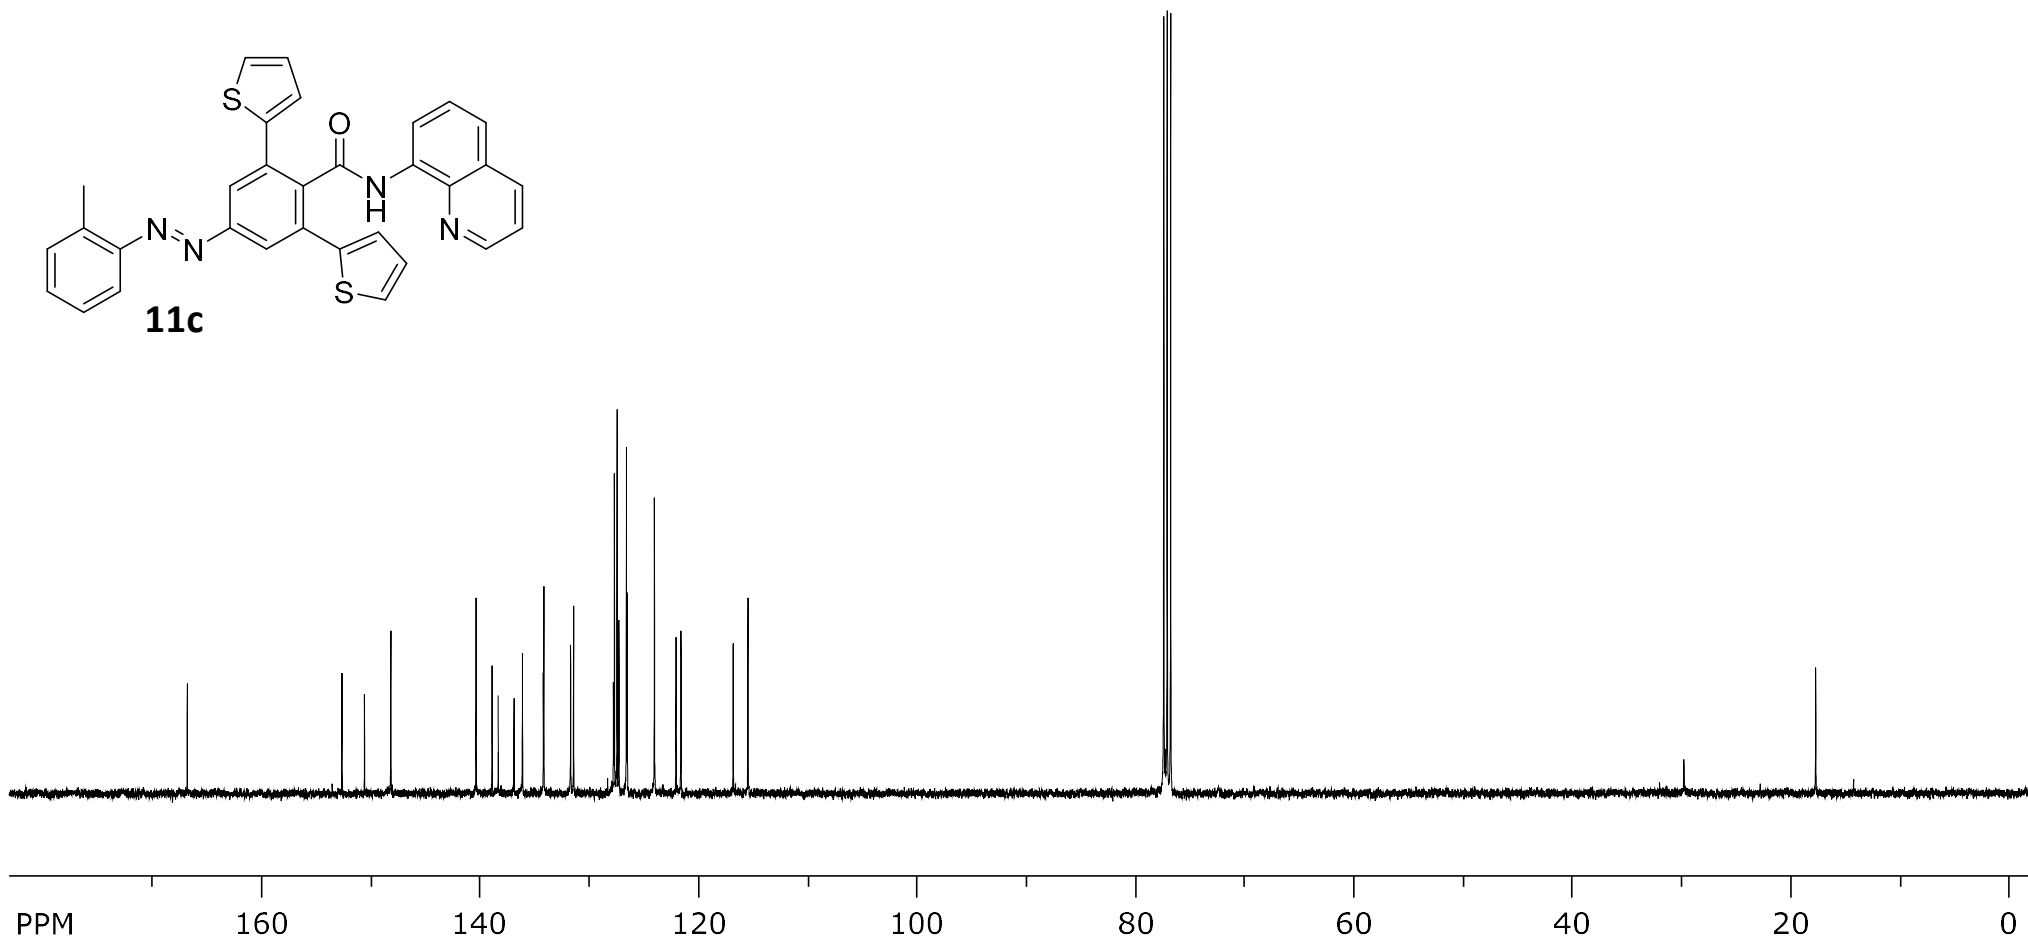

SpinWorks 4: RP 1266 REP  
C13CPD CDCl3 /opt/topspin3.5pl2/nmrdata nmrsu 60

152.694 —  
150.624 —  
148.217 —  
140.407 —  
138.380 —  
138.937 —  
136.153 —  
136.931 —  
134.198 —  
134.245 —  
131.471 —  
131.745 —  
127.820 —  
127.733 —  
127.486 —  
127.320 —  
126.629 —  
126.547 —  
124.070 —  
122.085 —  
121.632 —  
116.846 —  
115.501 —

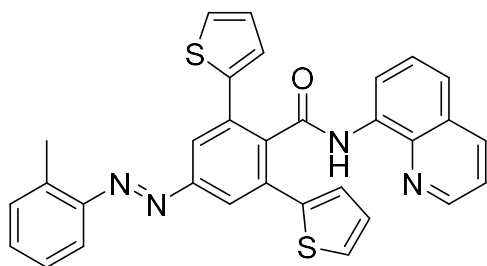

**11c**

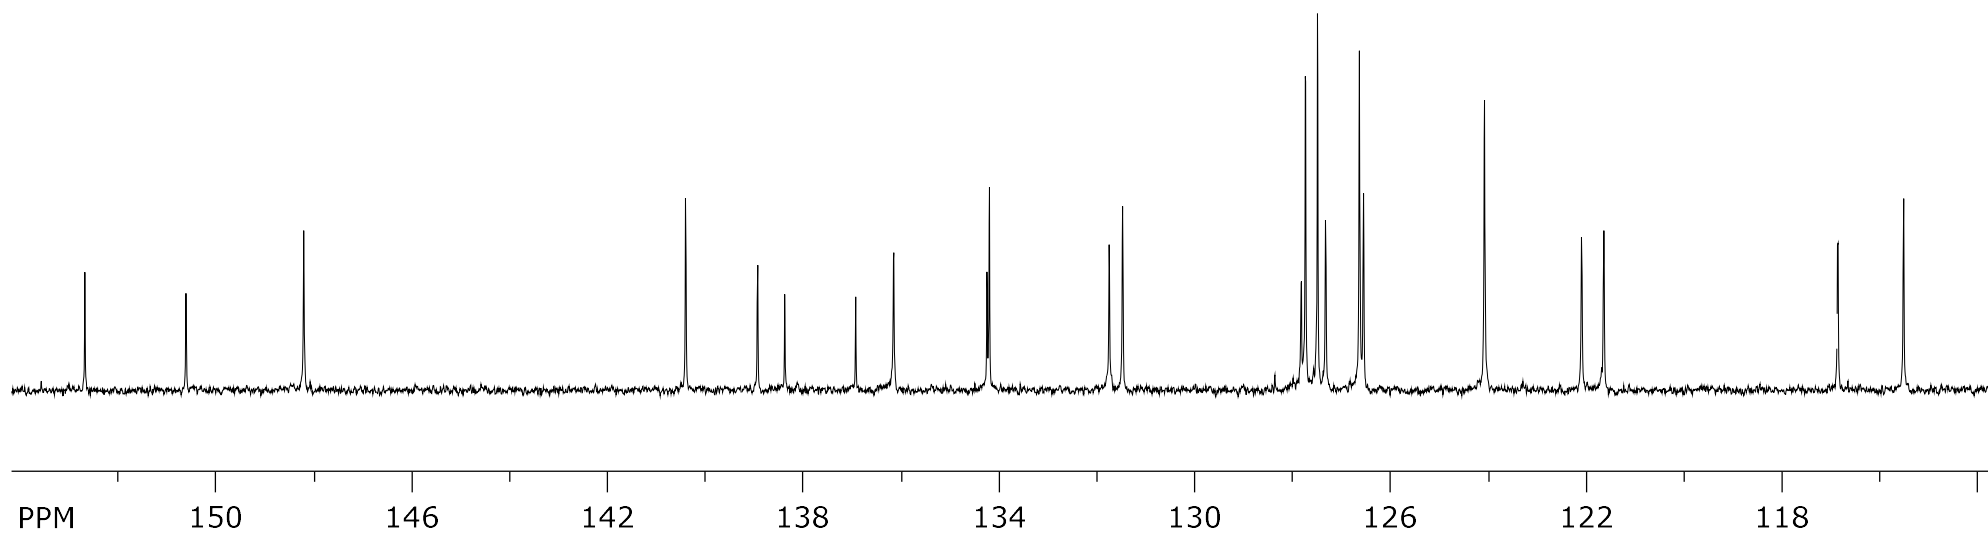

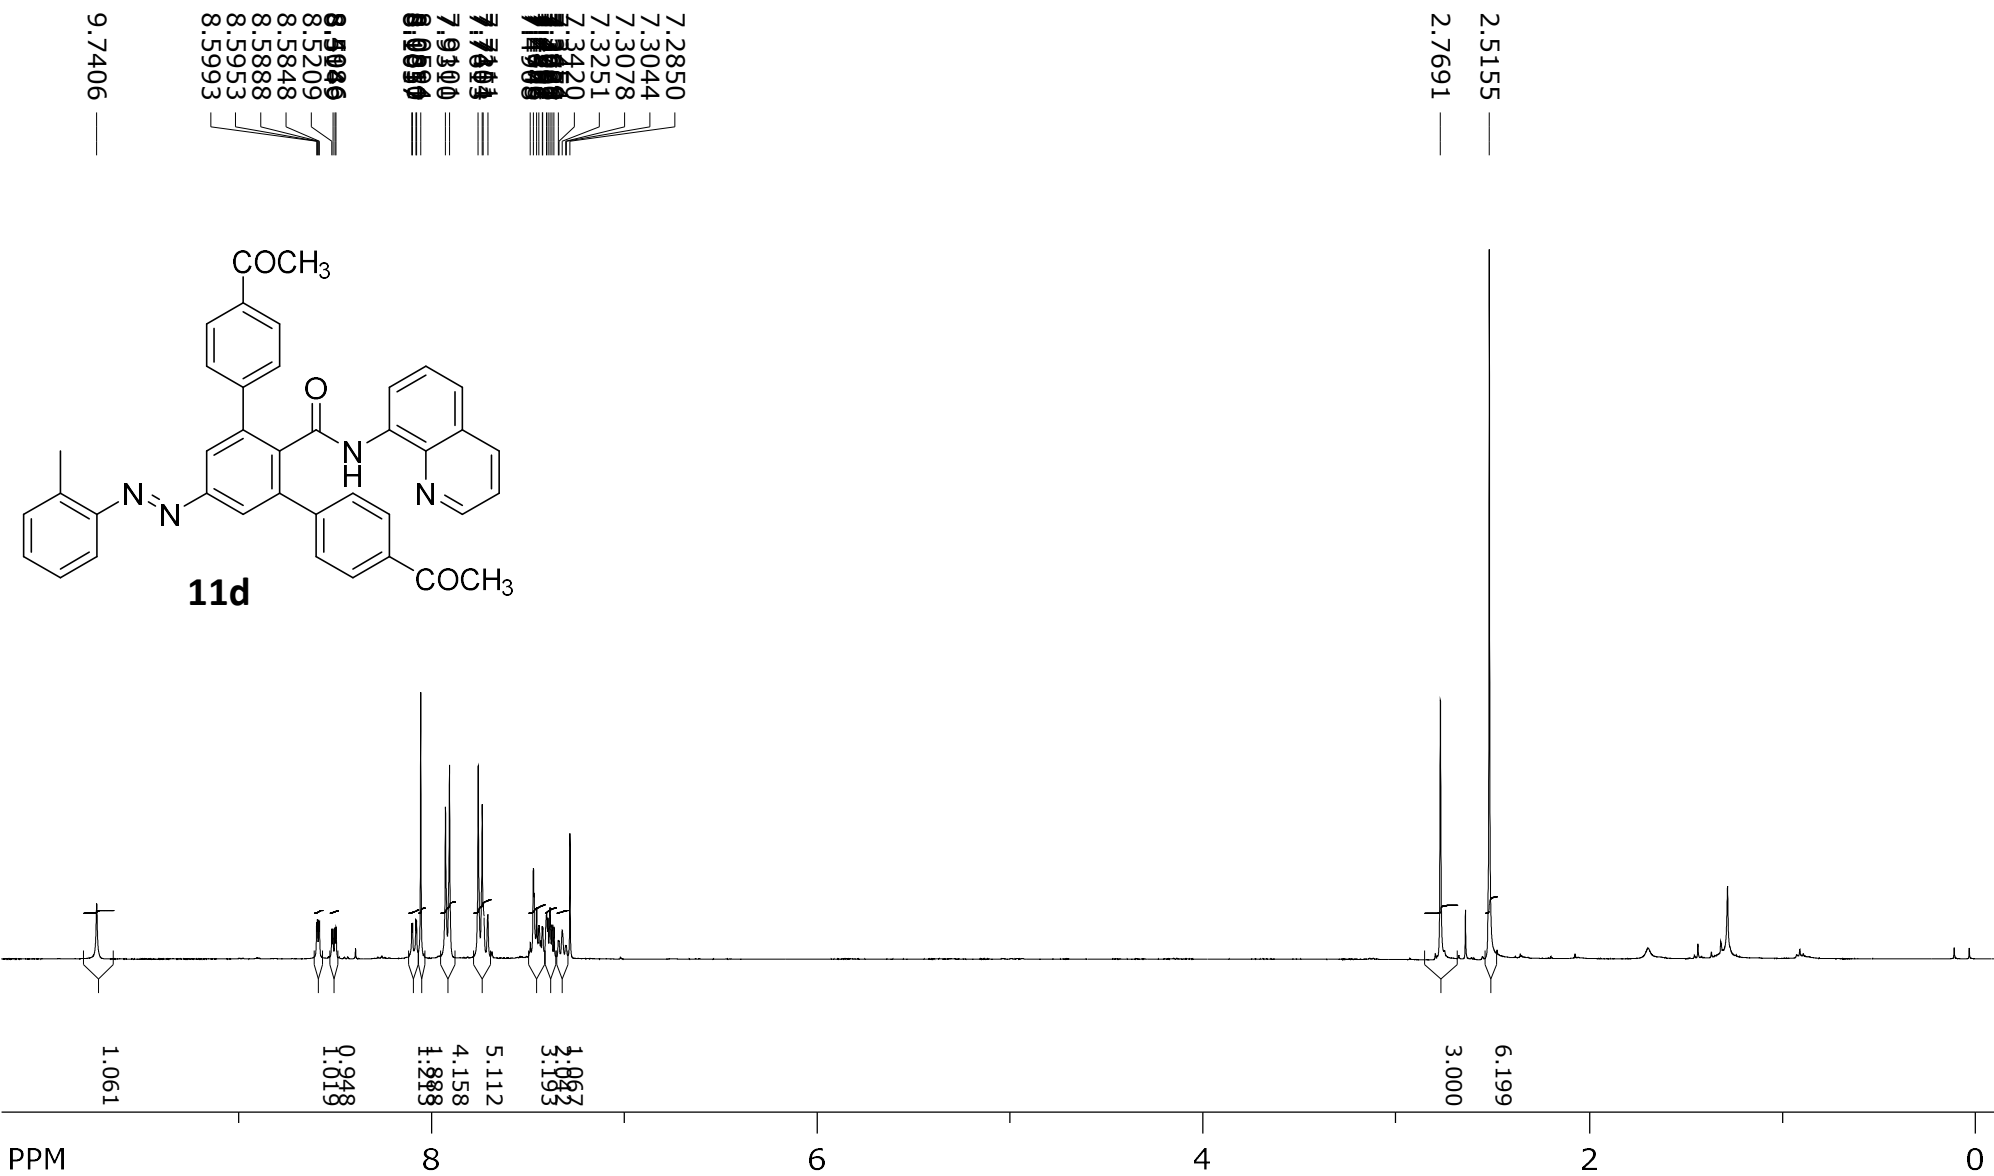



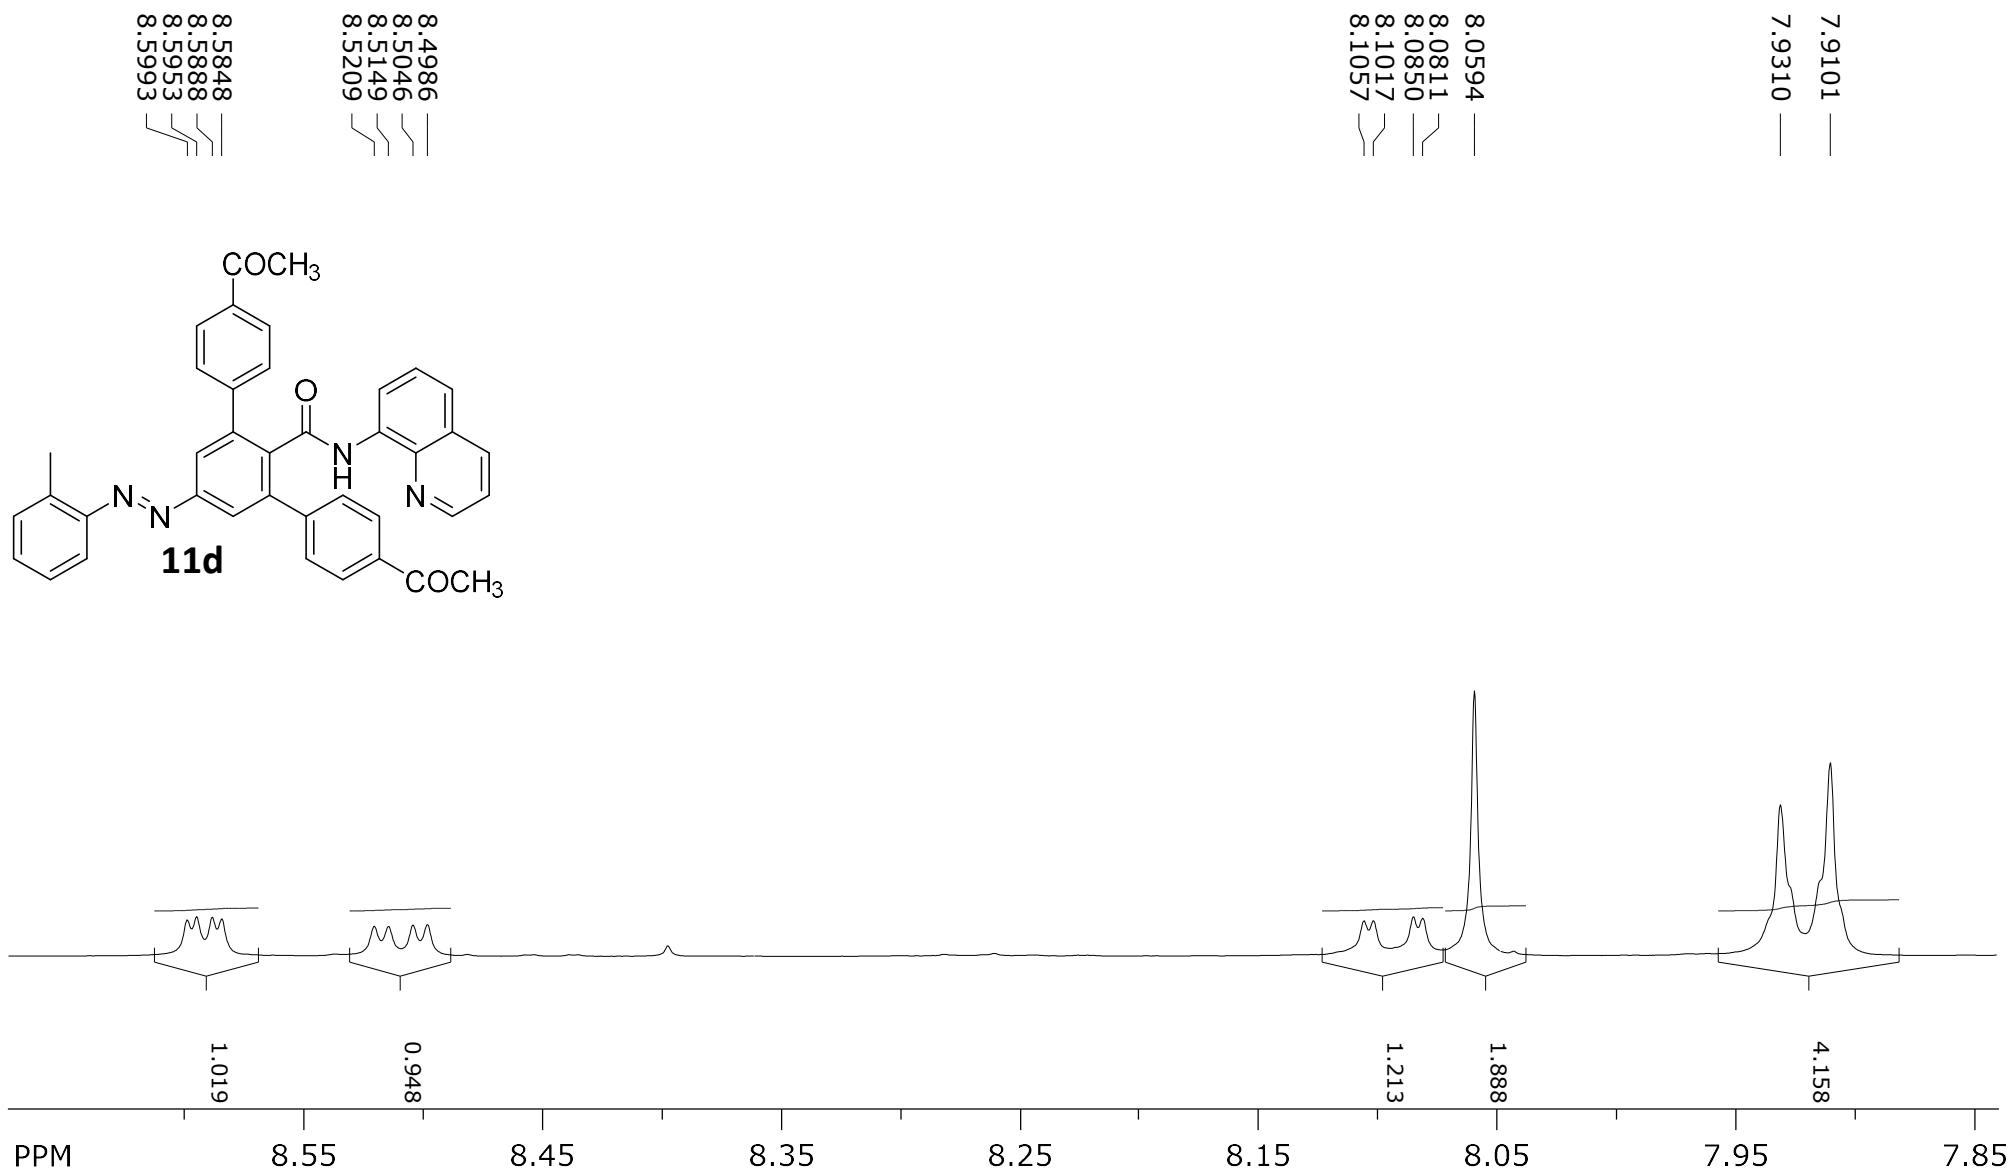

7.7613  
7.7351  
7.7404  
7.7111

7.2850  
7.3044  
7.3078  
7.3251  
7.3420  
7.3454  
7.3679  
7.3785  
7.3886  
7.3992  
7.4061  
7.4262  
7.4291  
7.4462  
7.4576  
7.4745  
7.4908

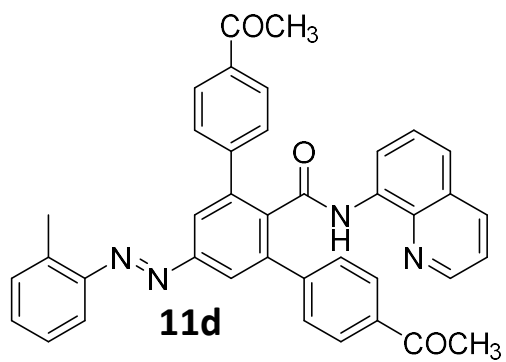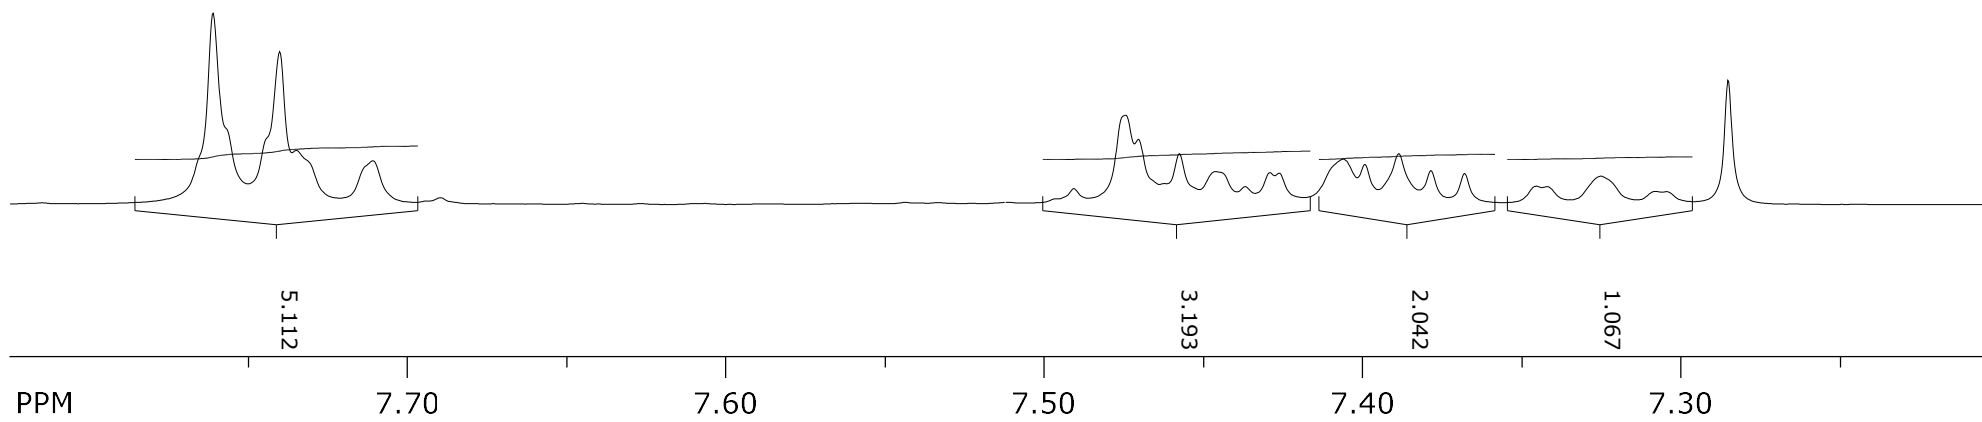

SpinWorks 4: RP 1274 REP  
C13CPD CDCl3 /opt/topspin3.5pl2/nmrdata nmrsu 57

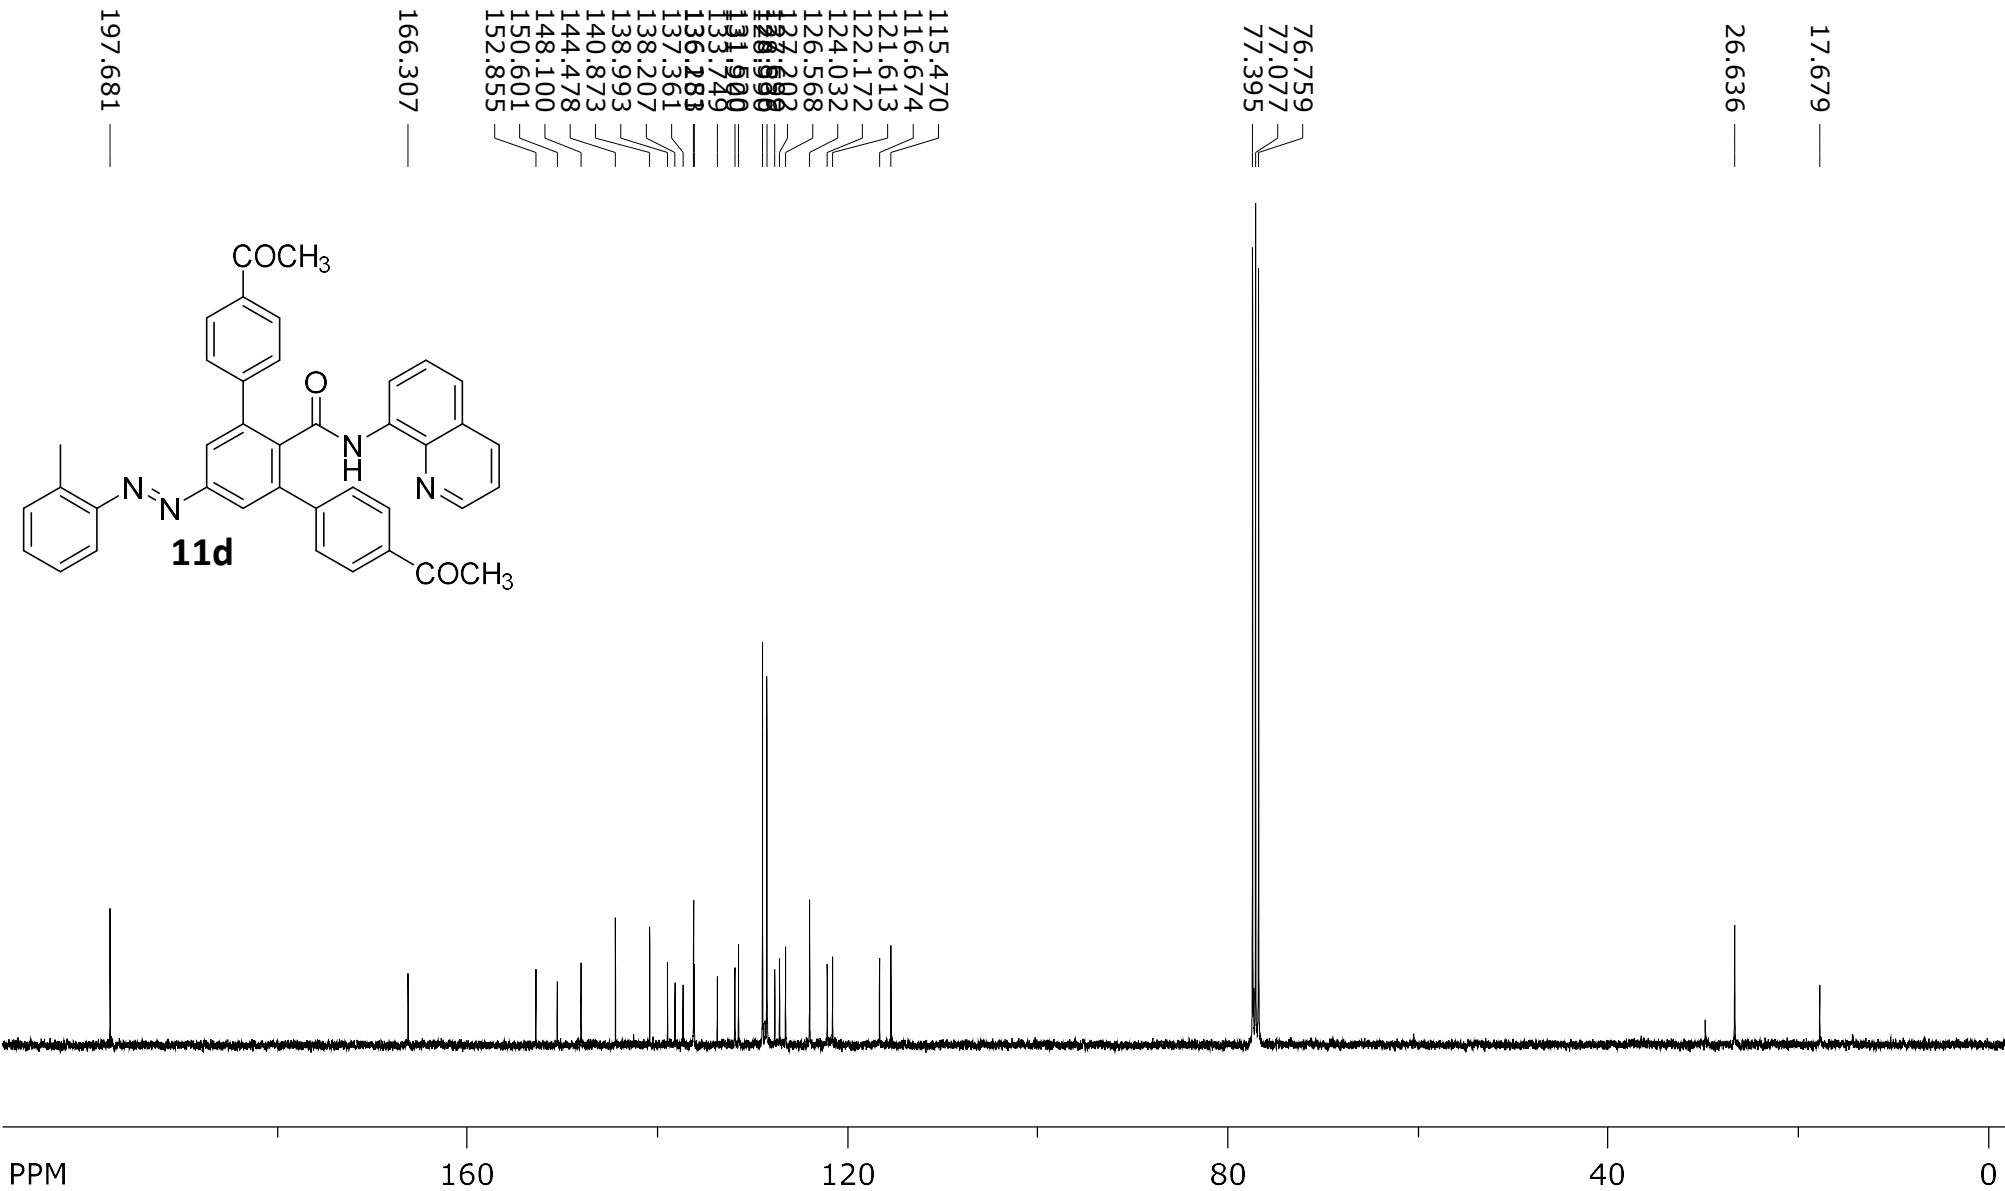

SpinWorks 4: RP 1274 REP  
C13CPD CDCl3 /opt/topspin3.5pl2/nmrdata nmrsu 57

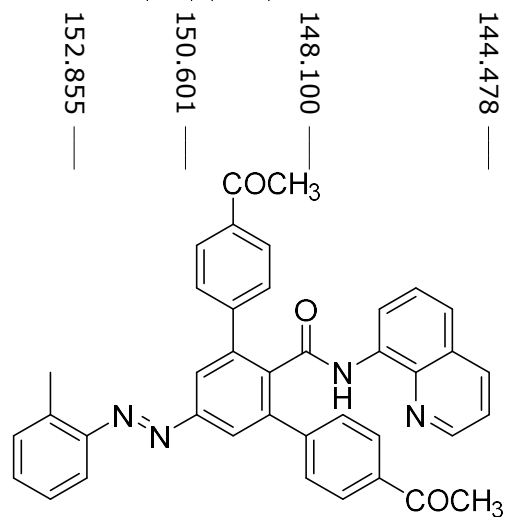

11d

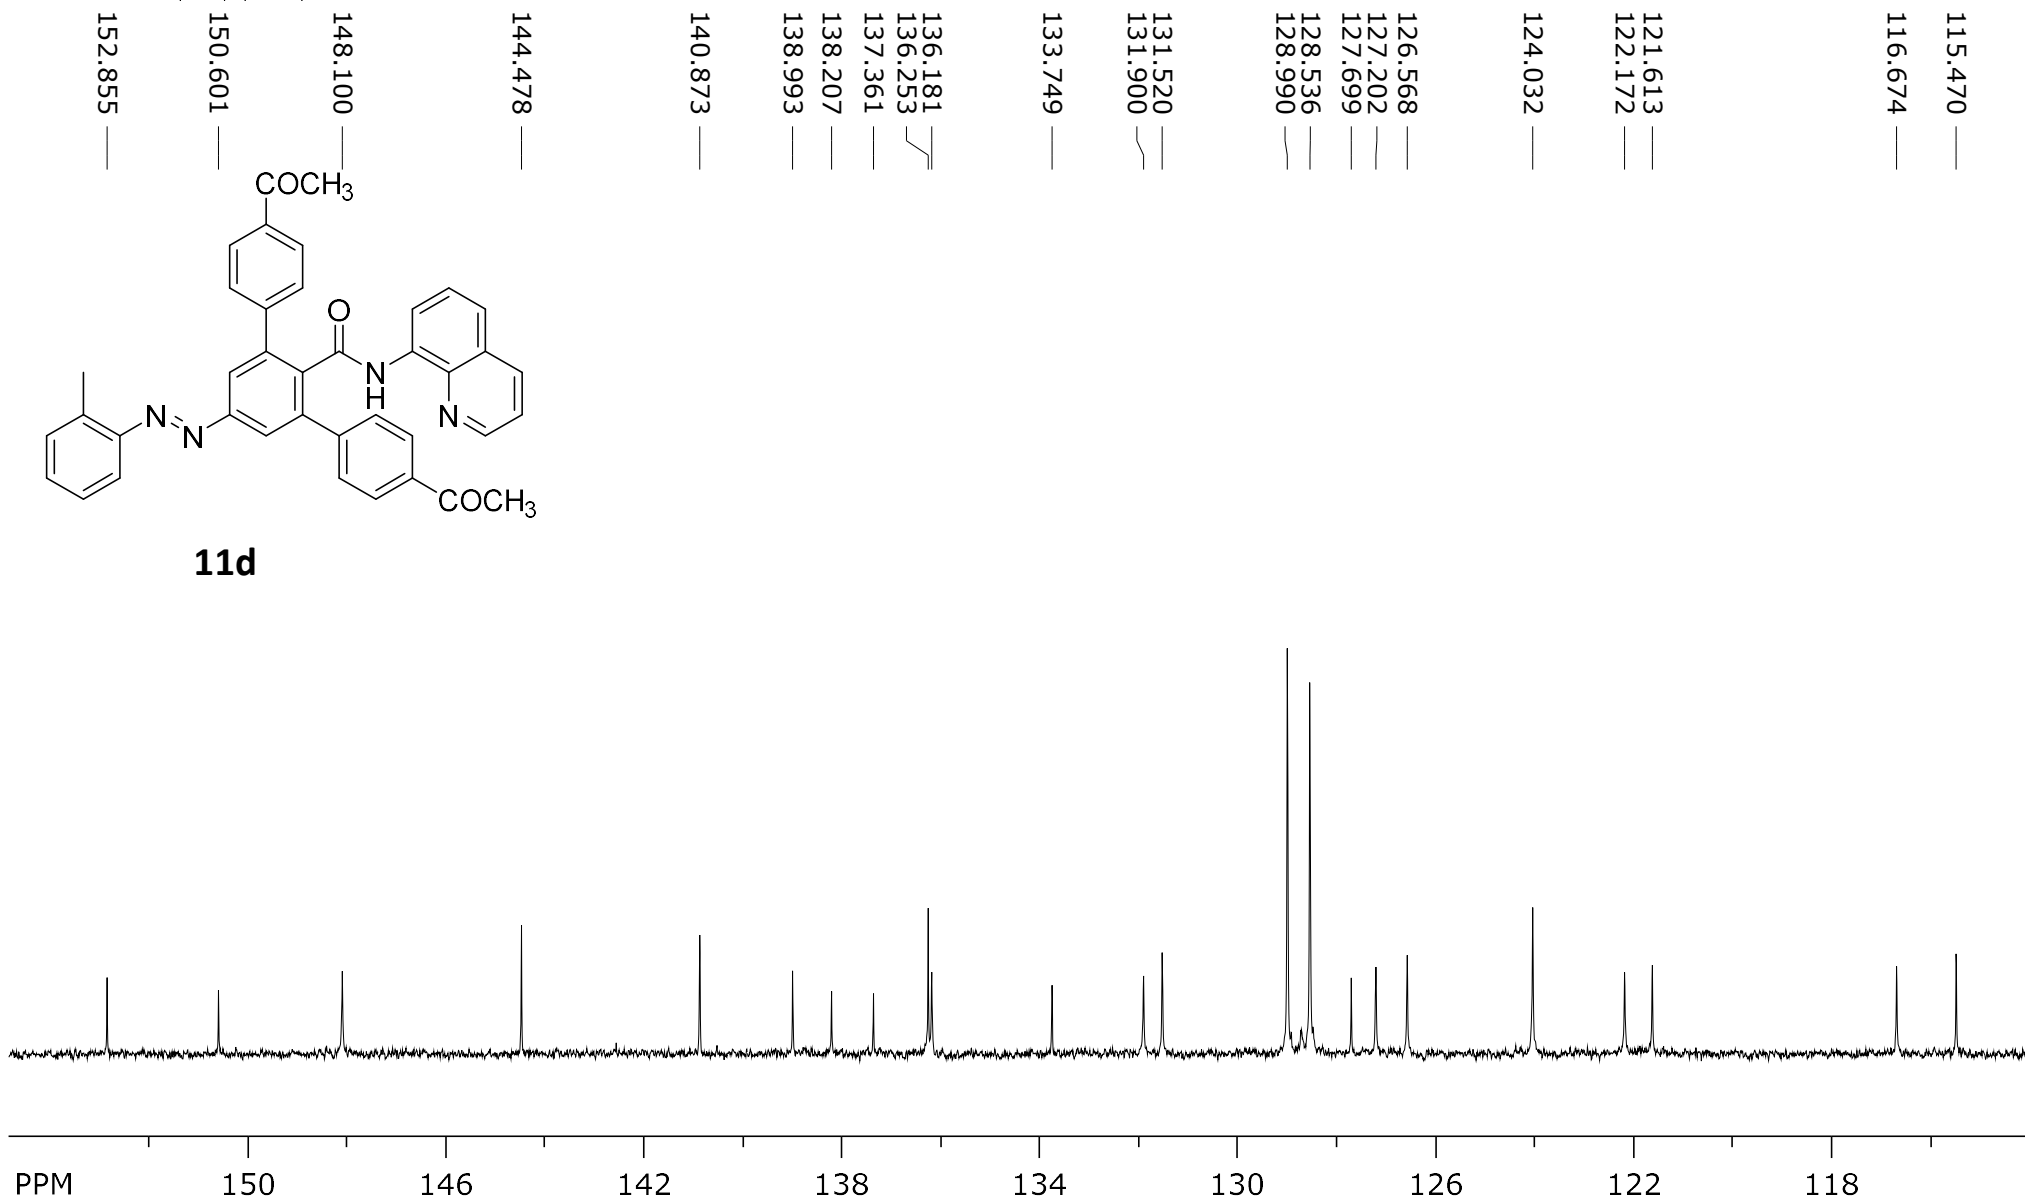

SpinWorks 4: RP 978 A2  
PROTON CDCl3 /opt/topspin3.5pl2/nmrdata nmrsu 2

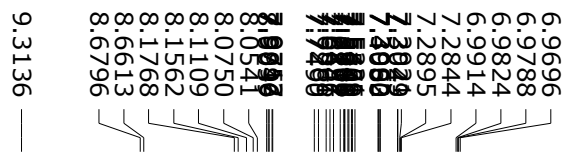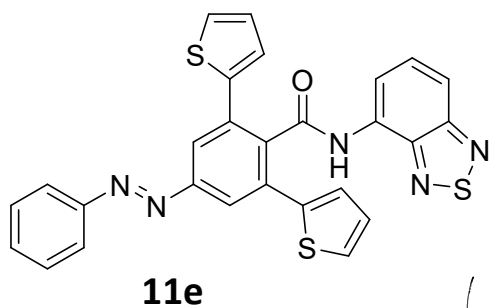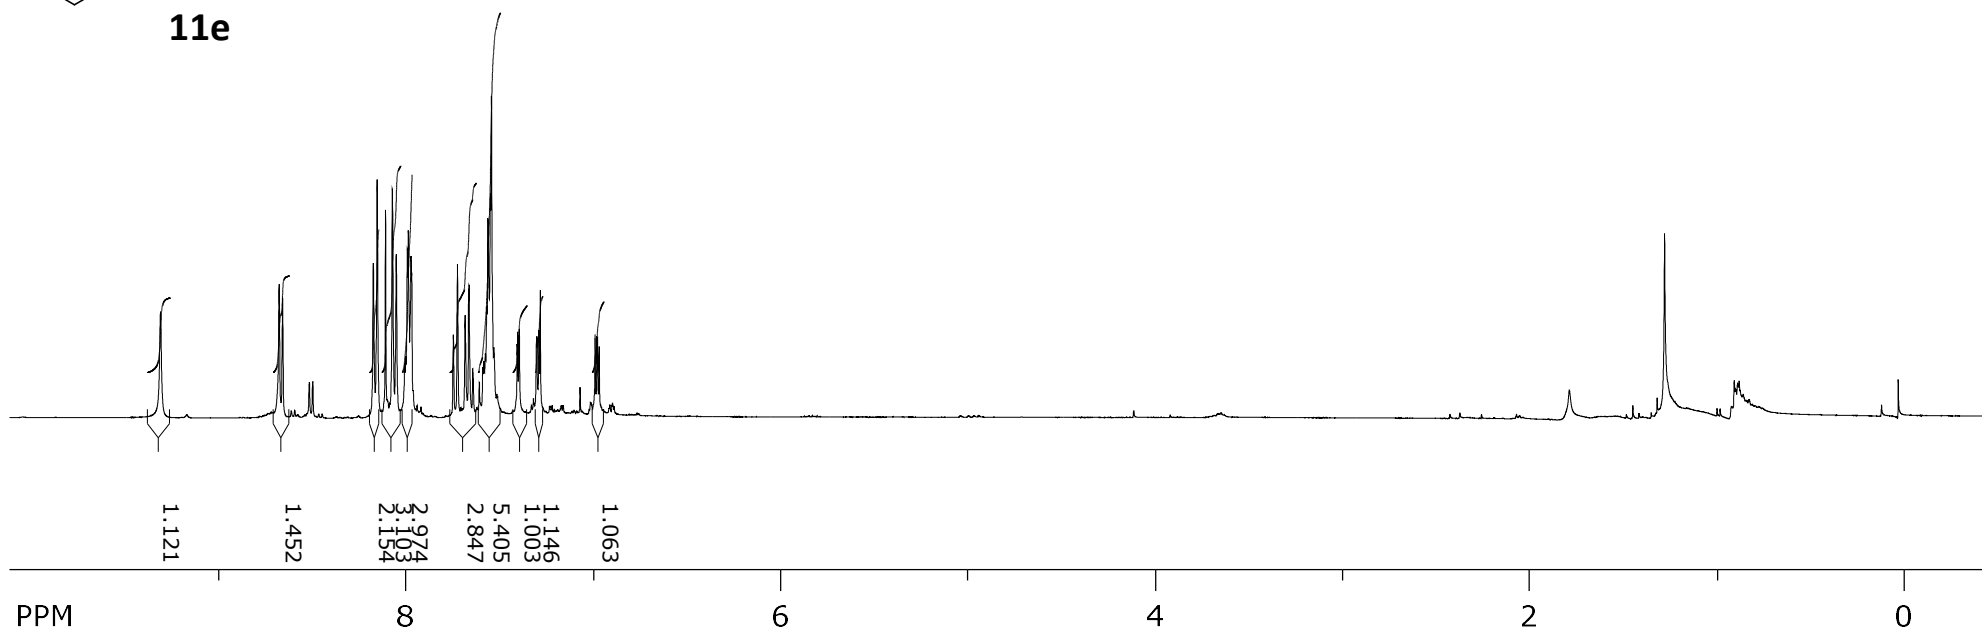

SpinWorks 4: RP 978 A2  
PROTON CDCl3 /opt/topspin3.5pl2/nmrdata nmrsu 2

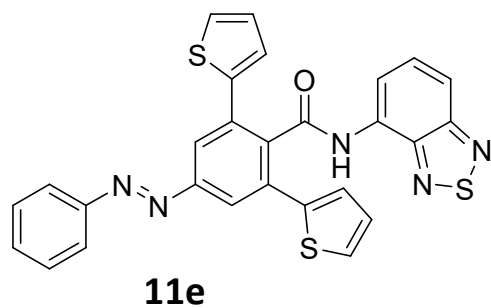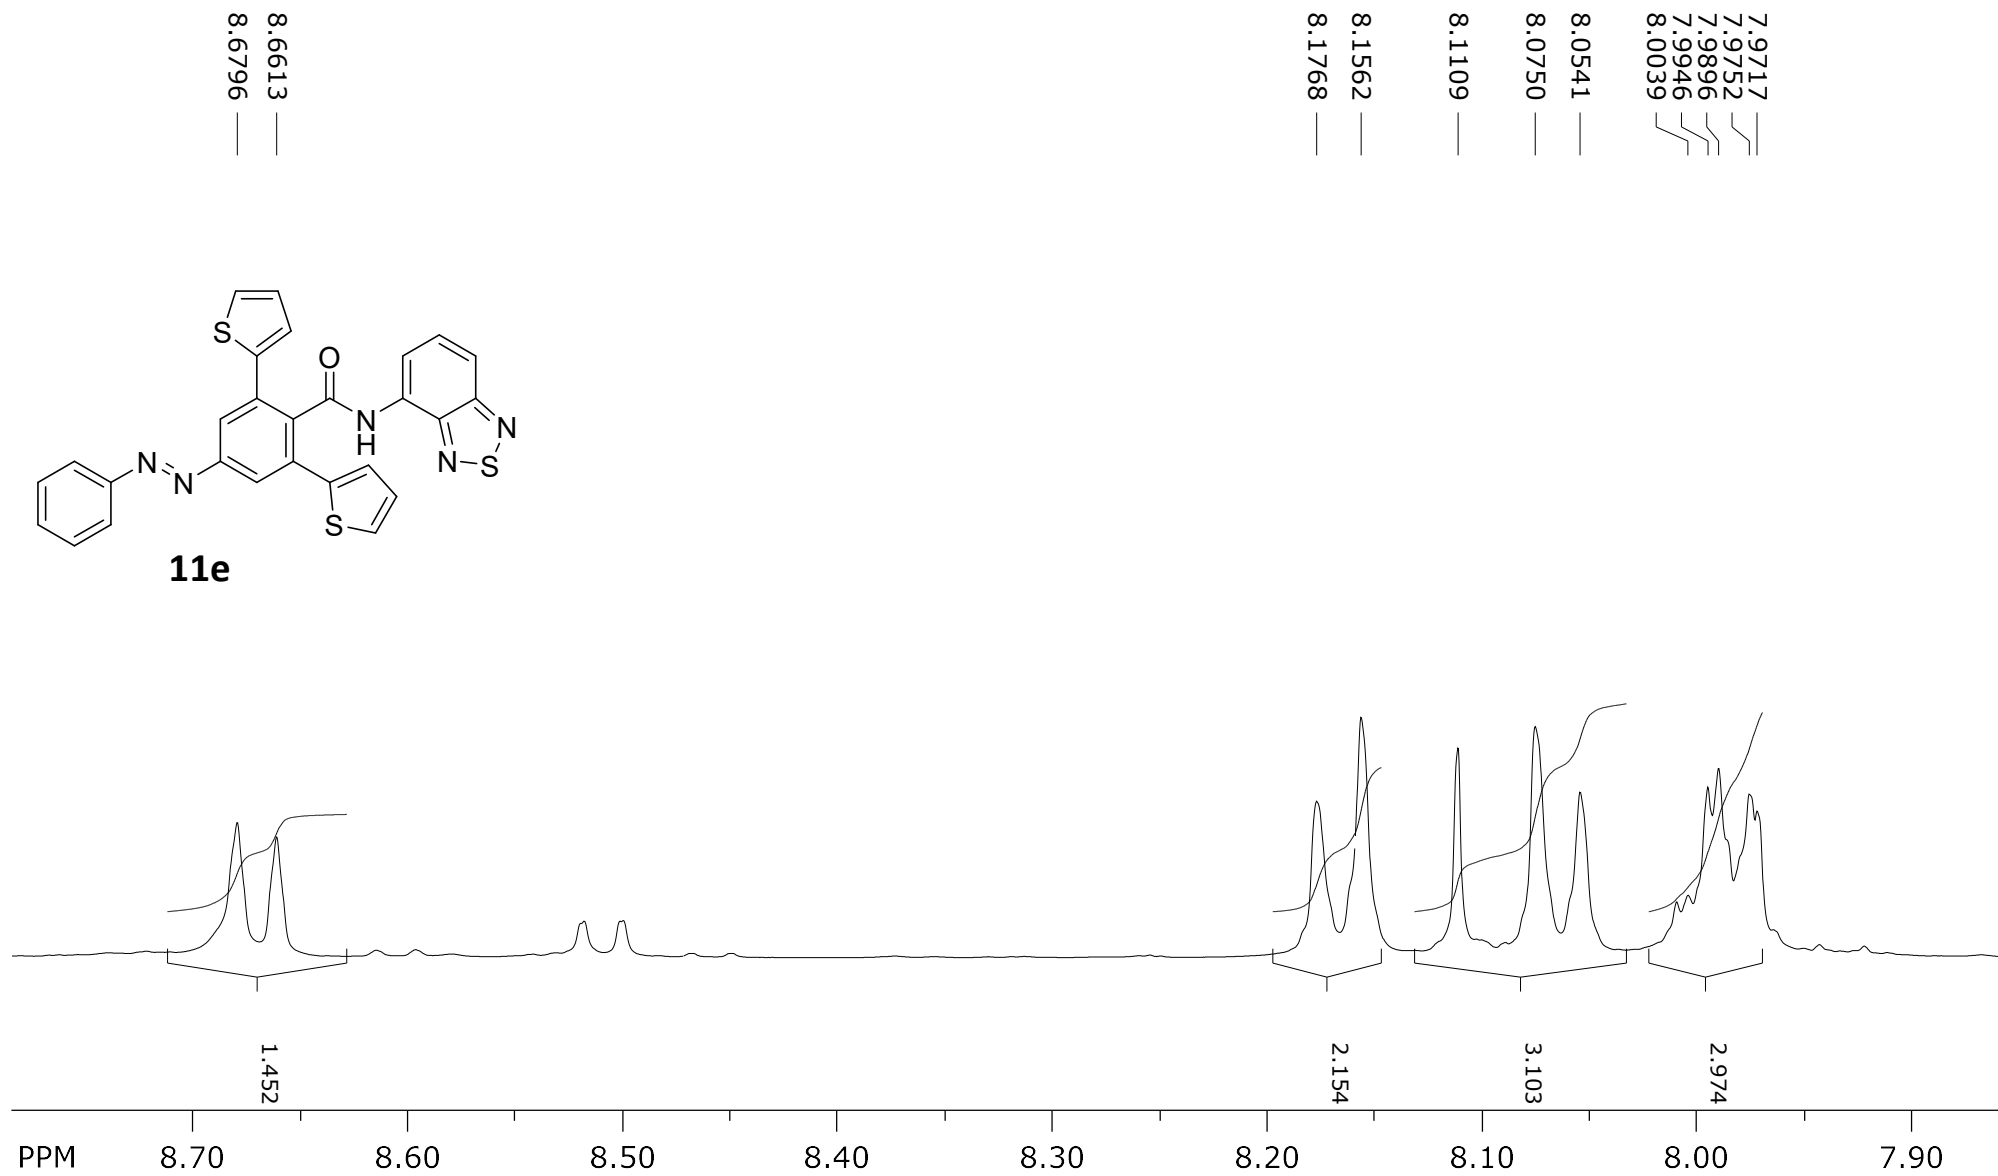

SpinWorks 4: RP 978 A2  
PROTON CDCl3 /opt/topspin3.5pl2/nmrdata nmrsu 2

7.5321  
7.5455  
7.5509  
7.5640  
7.5701  
7.5866  
7.5918  
7.6102  
7.6457  
7.6646  
7.6861  
7.7269  
7.7490

7.3962  
7.3990  
7.4053  
7.4080

7.2844  
7.2895  
7.2921  
7.3023  
7.3049

6.9696  
6.9788  
6.9824  
6.9914

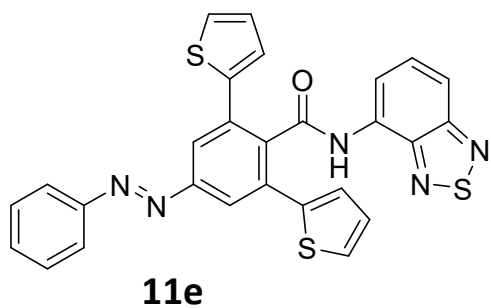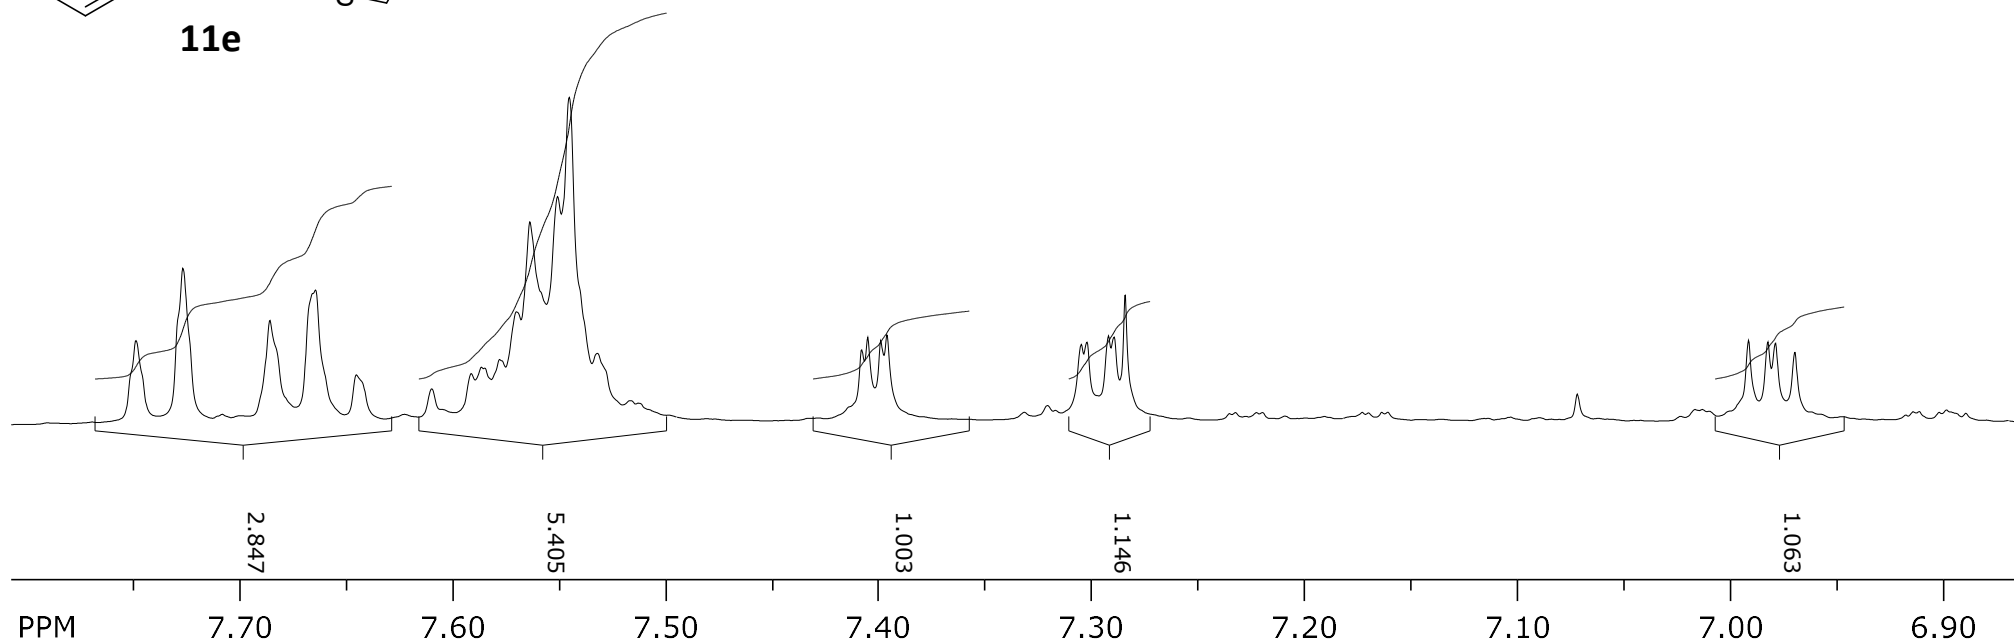

SpinWorks 4: RP 978 A2  
C13CPD256 CDCl3 /opt/topspin3.5pl2/nmrdata nmrsu 2

164.792  
154.759  
152.493  
154.681  
147.981  
139.980  
135.682  
134.300  
131.832  
131.159  
129.891  
129.229  
128.993  
127.643  
126.924  
124.034  
123.288  
123.225  
116.178  
115.250

76.778  
77.096  
77.414

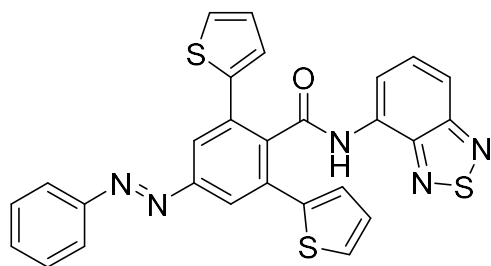

**11e**

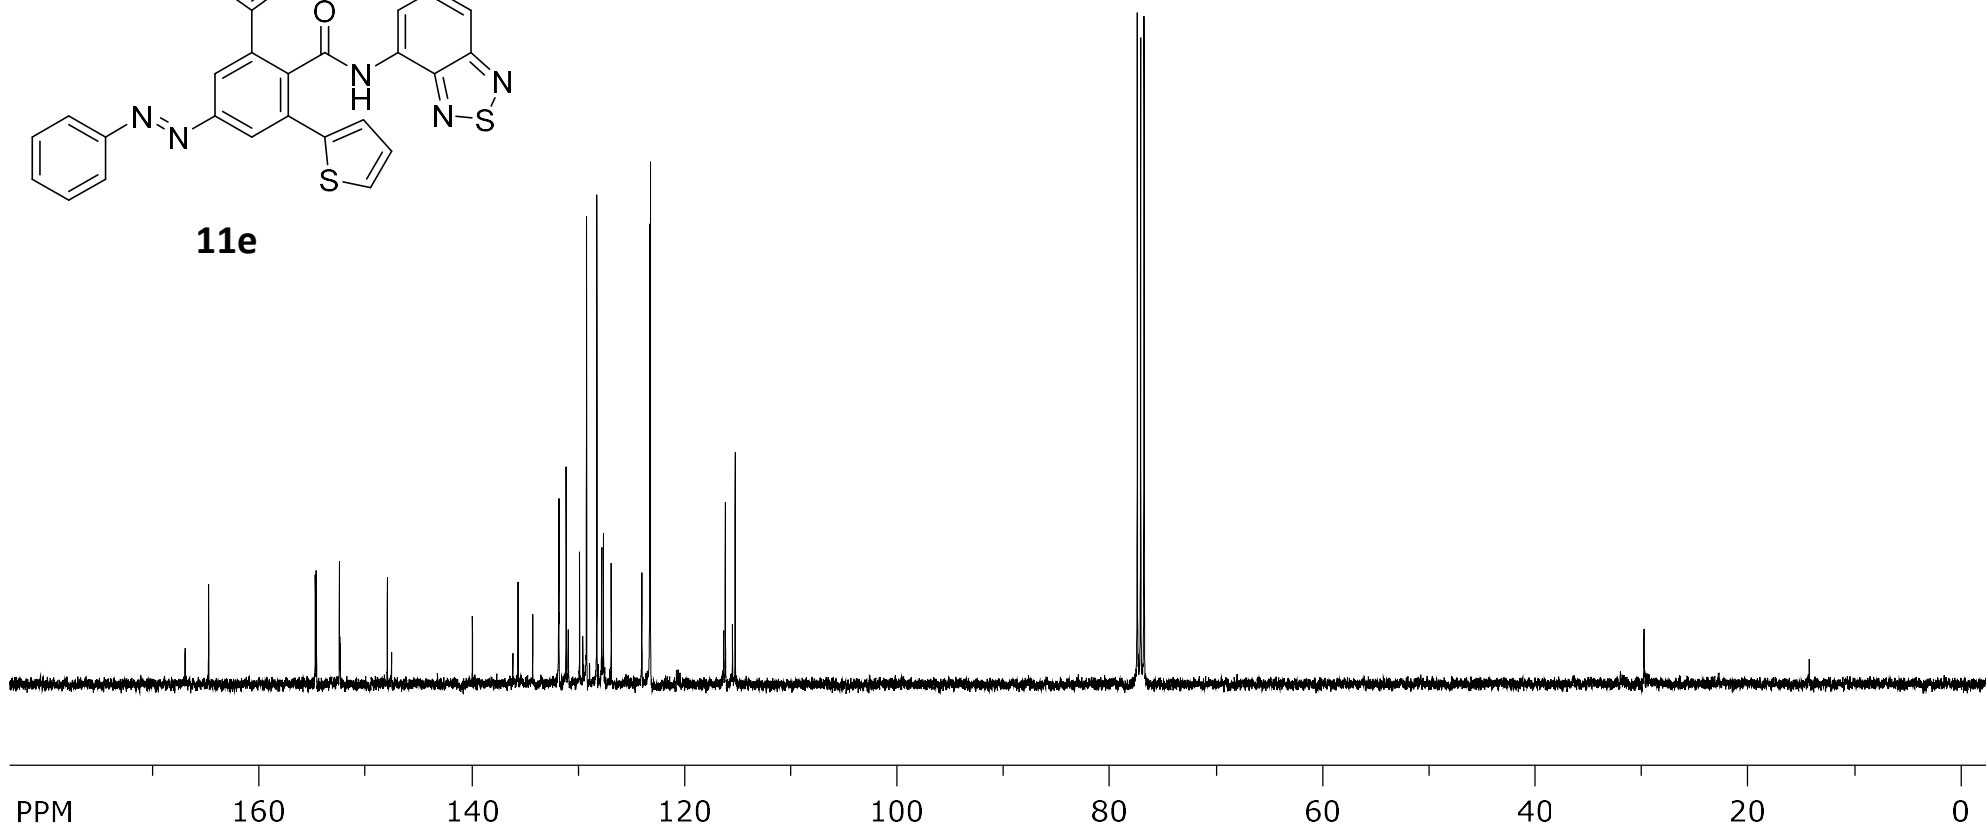







SpinWorks 4: SAB300605  
1H\_8scan CDCl3 {D:\Spectra} nmr 30

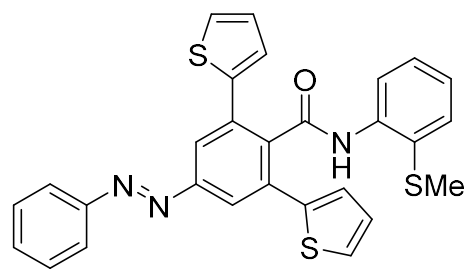

**11f**

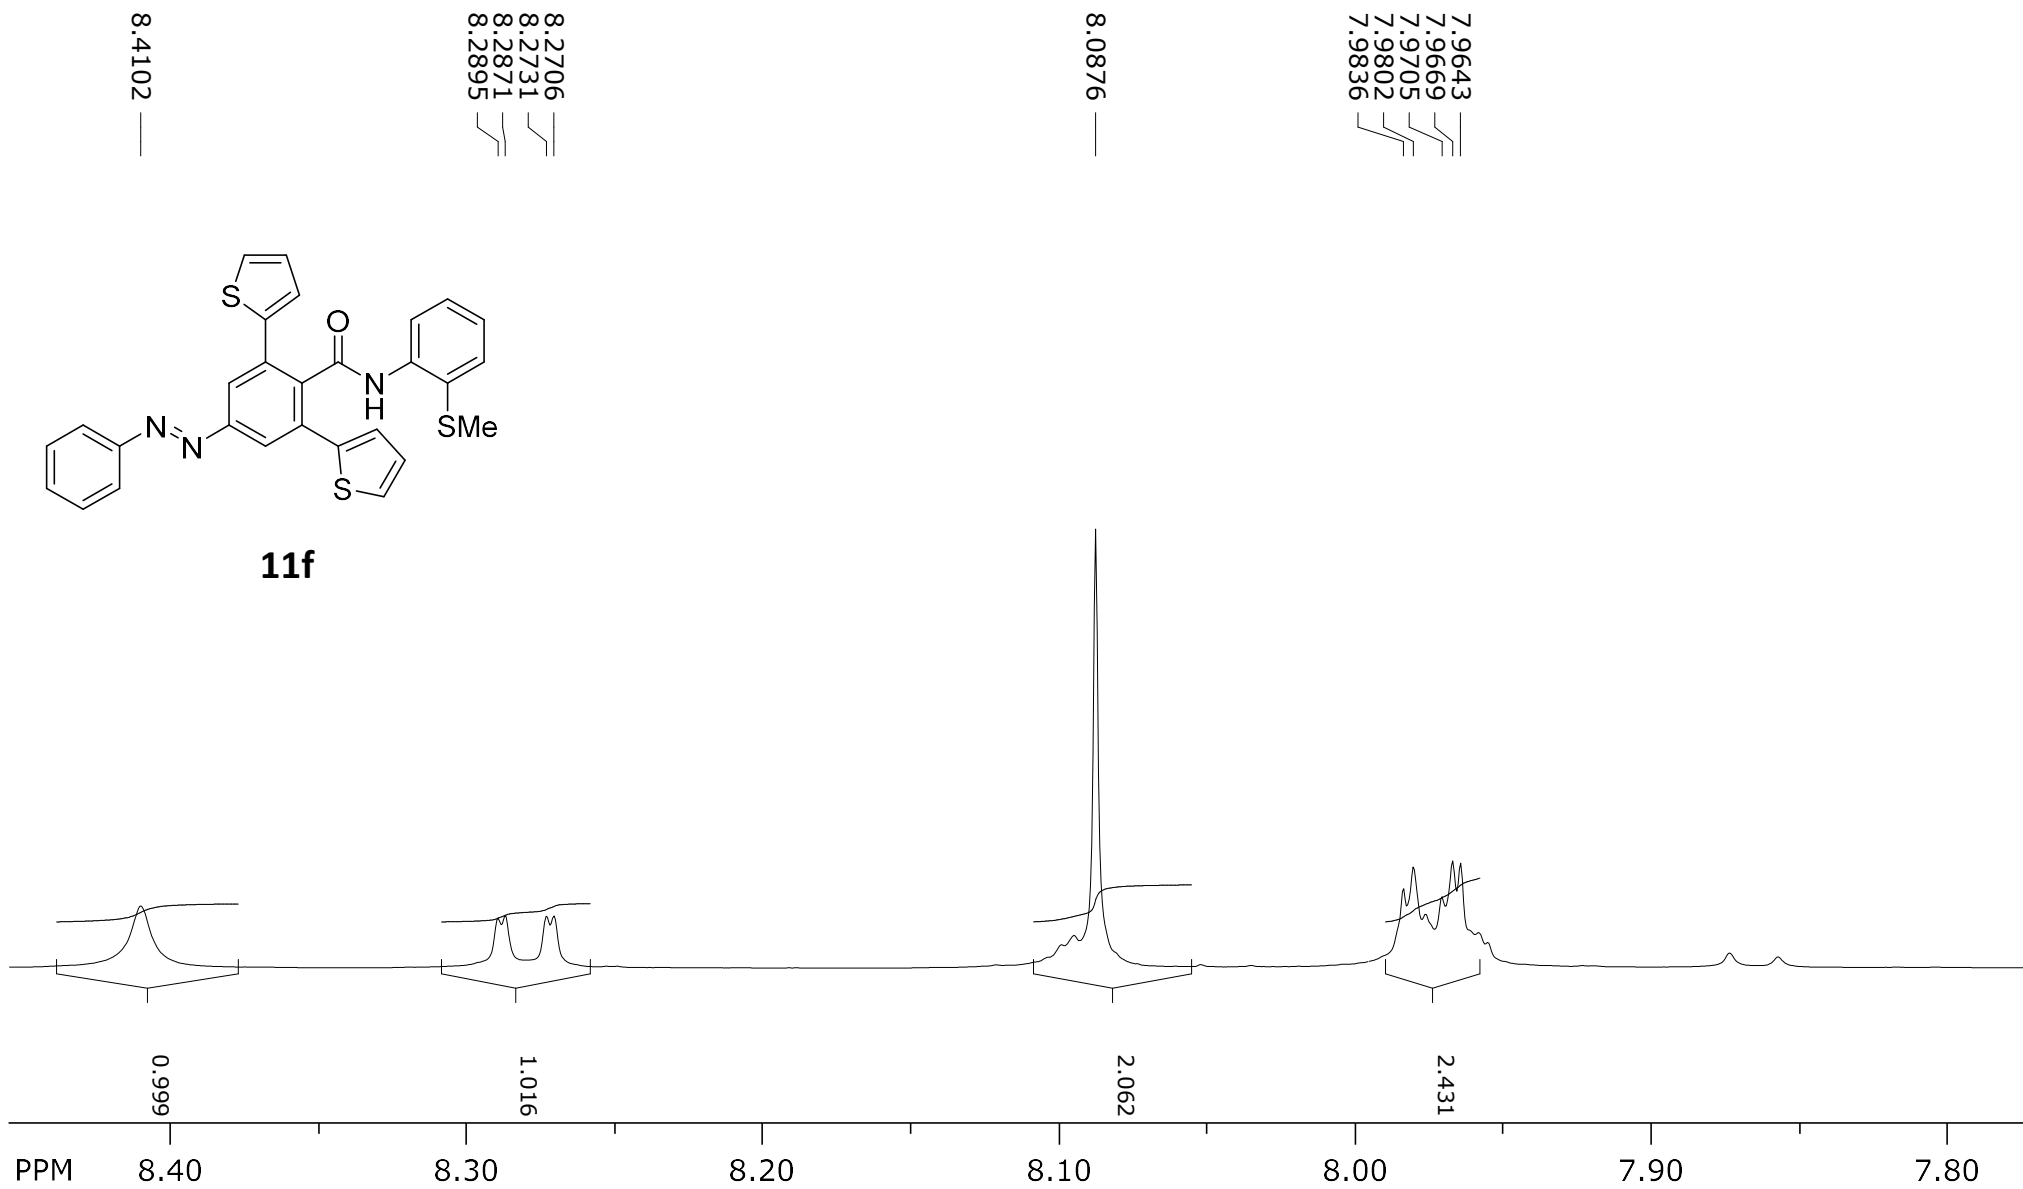

SpinWorks 4: SAB300605  
1H\_8scan CDCl3 {D:\Spectra} nmr 30

7.5186  
7.5239  
7.5278  
7.5312  
7.5354  
7.5477  
7.5506  
7.5563  
7.5642  
7.5680

7.3994  
7.4024  
7.4128  
7.4150  
7.4199  
7.4222

7.2826  
7.2855  
7.2996  
7.3010  
7.3141  
7.3168  
7.3318  
7.3341  
7.3420  
7.3443  
7.3495  
7.3516

7.0243  
7.0315  
7.0346  
7.0418  
7.0499  
7.0528  
7.0653  
7.0680

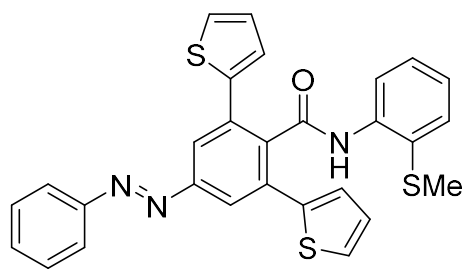

**11f**

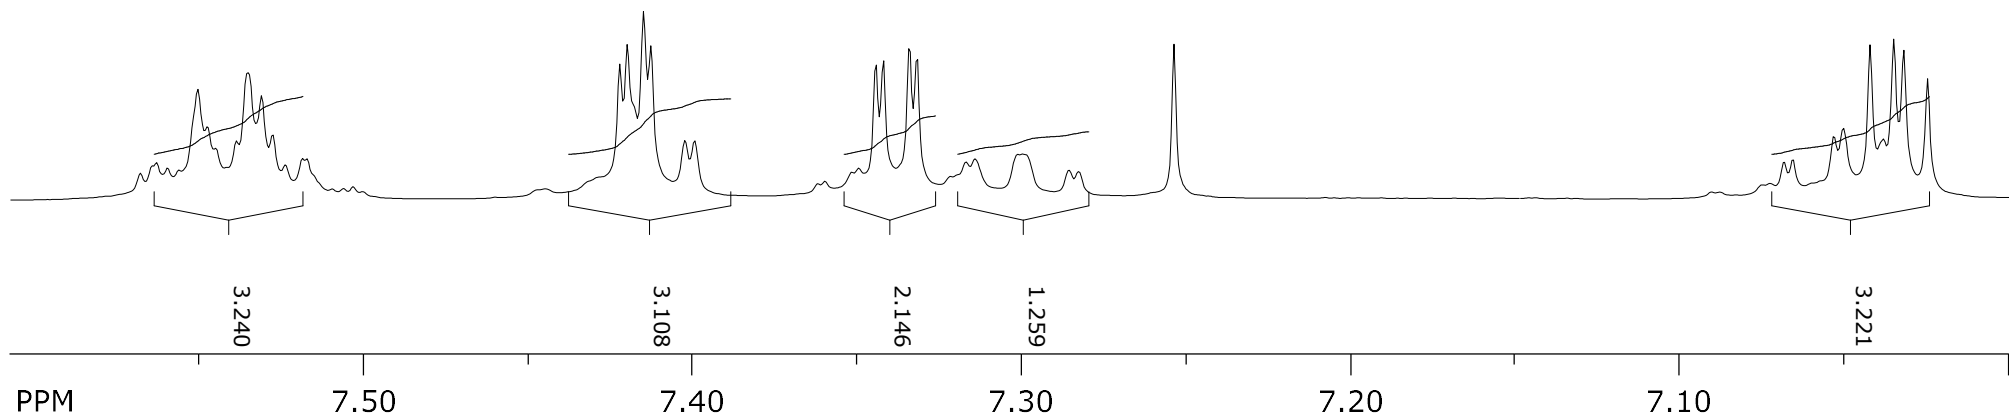

SpinWorks 4: SAB140305  
C13CPD CDCl3 {D:\Spectra} nmr 30

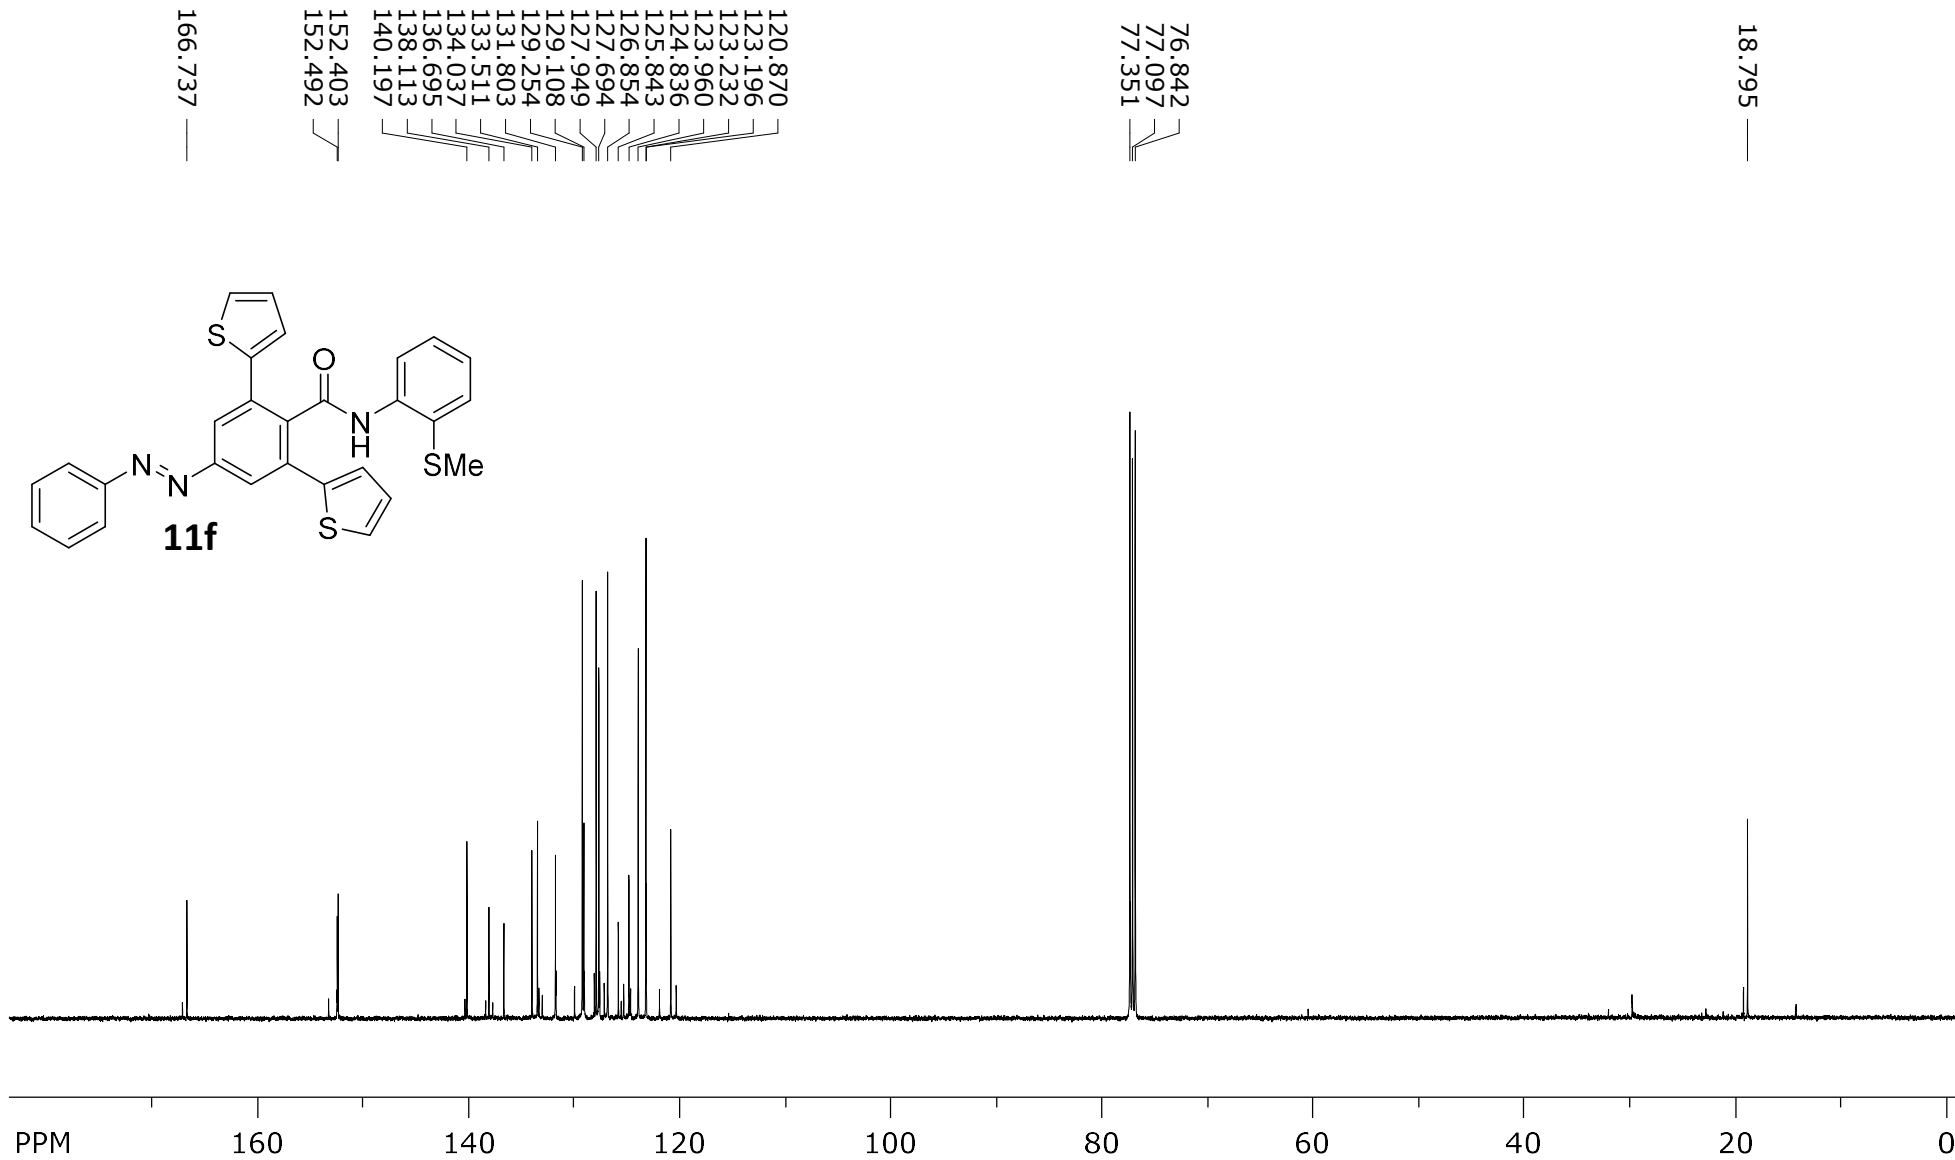

SpinWorks 4: RP 1233 B2  
PROTON CDCl3 /opt/topspin3.5pl2/nmrdata nmrsu 2

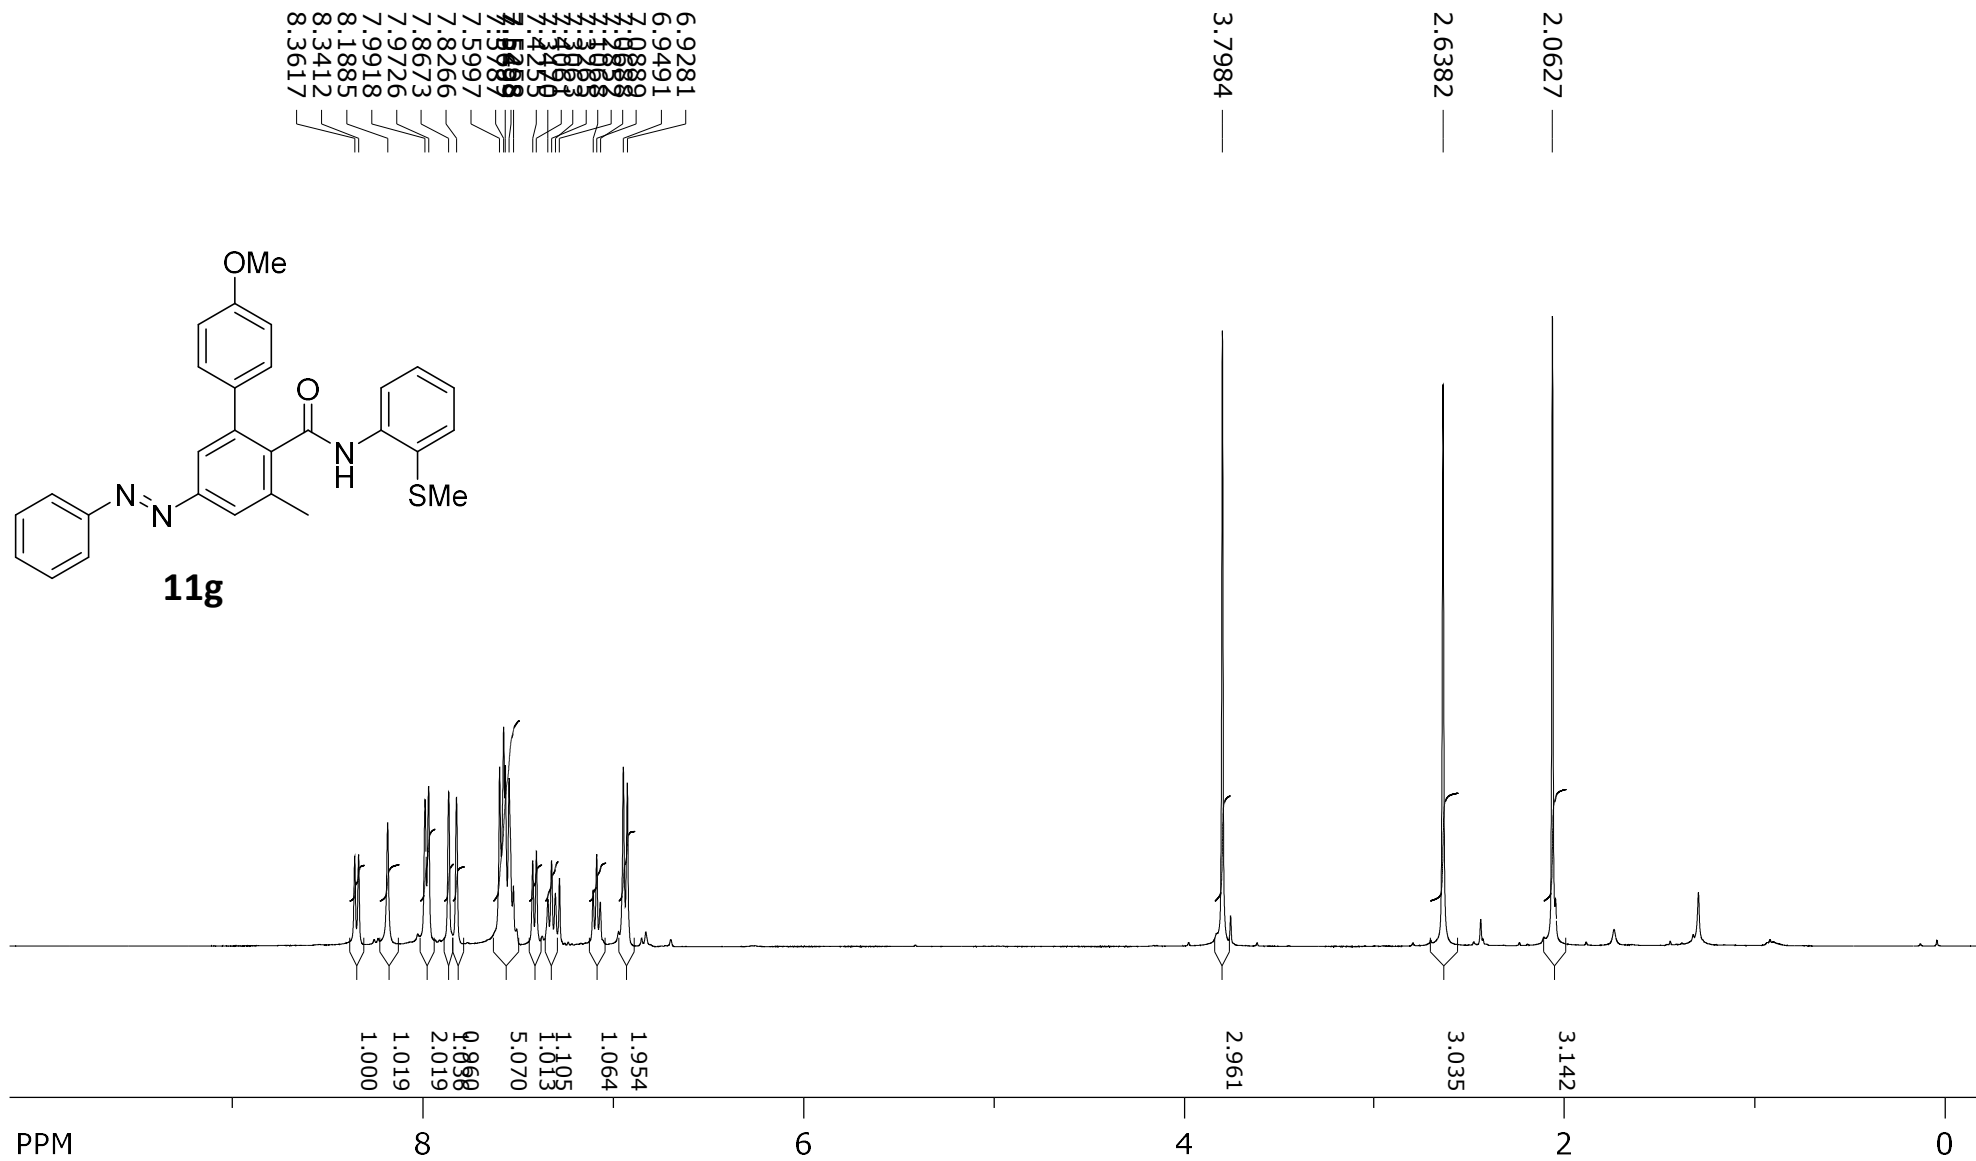

SpinWorks 4: RP 1233 B2  
PROTON CDCl3 /opt/topspin3.5pl2/nmrdata nmrsu 2

8.3412 —  
8.3617 —  
8.1885 —  
7.9726 —  
7.9918 —  
7.8266 —  
7.8673 —  
7.5458 —  
7.5699 —  
7.5787 —  
7.5997 —  
7.4061 —  
7.4255 —  
7.2852 —  
7.3063 —  
7.3265 —  
7.3470 —  
7.0688 —  
7.0889 —  
7.1068 —  
6.9281 —  
6.9491 —

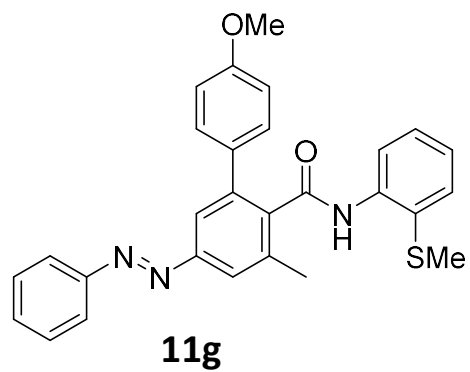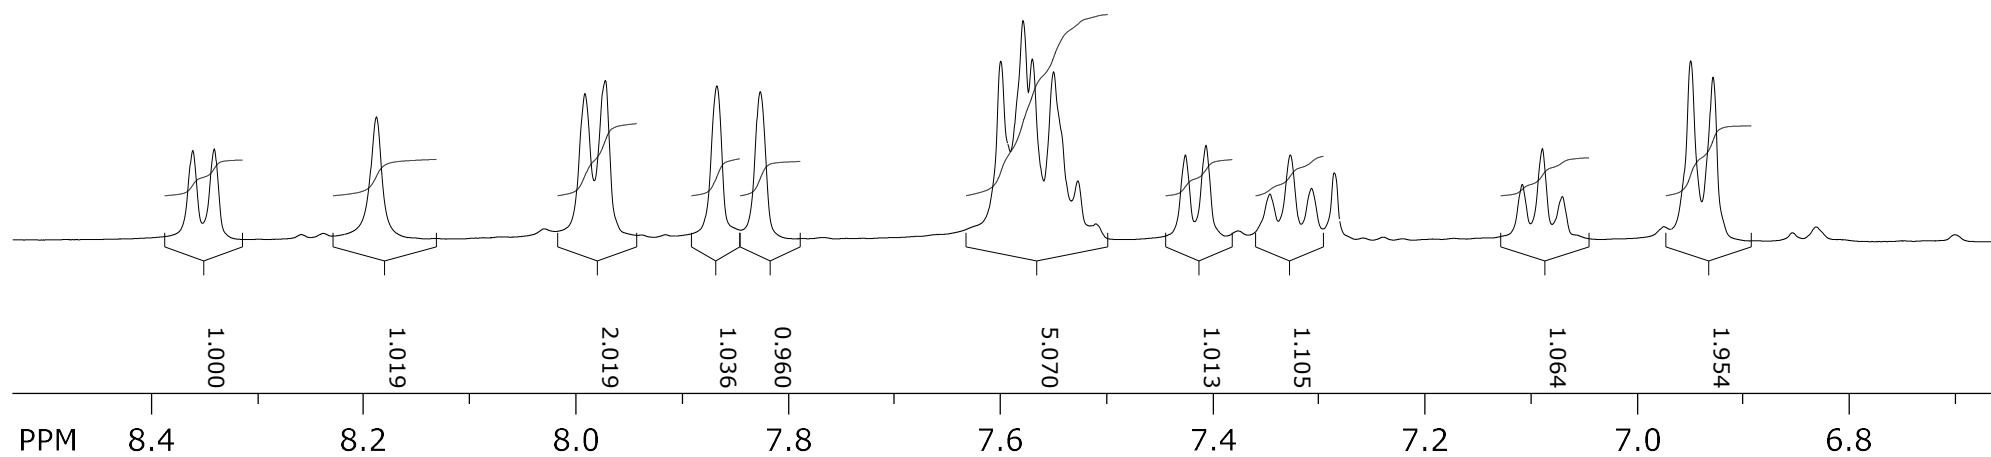

SpinWorks 4: RP 1233 B2  
C13CPD256 CDCl3 /opt/topspin3.5pl2/nmrdata nmrsu 2

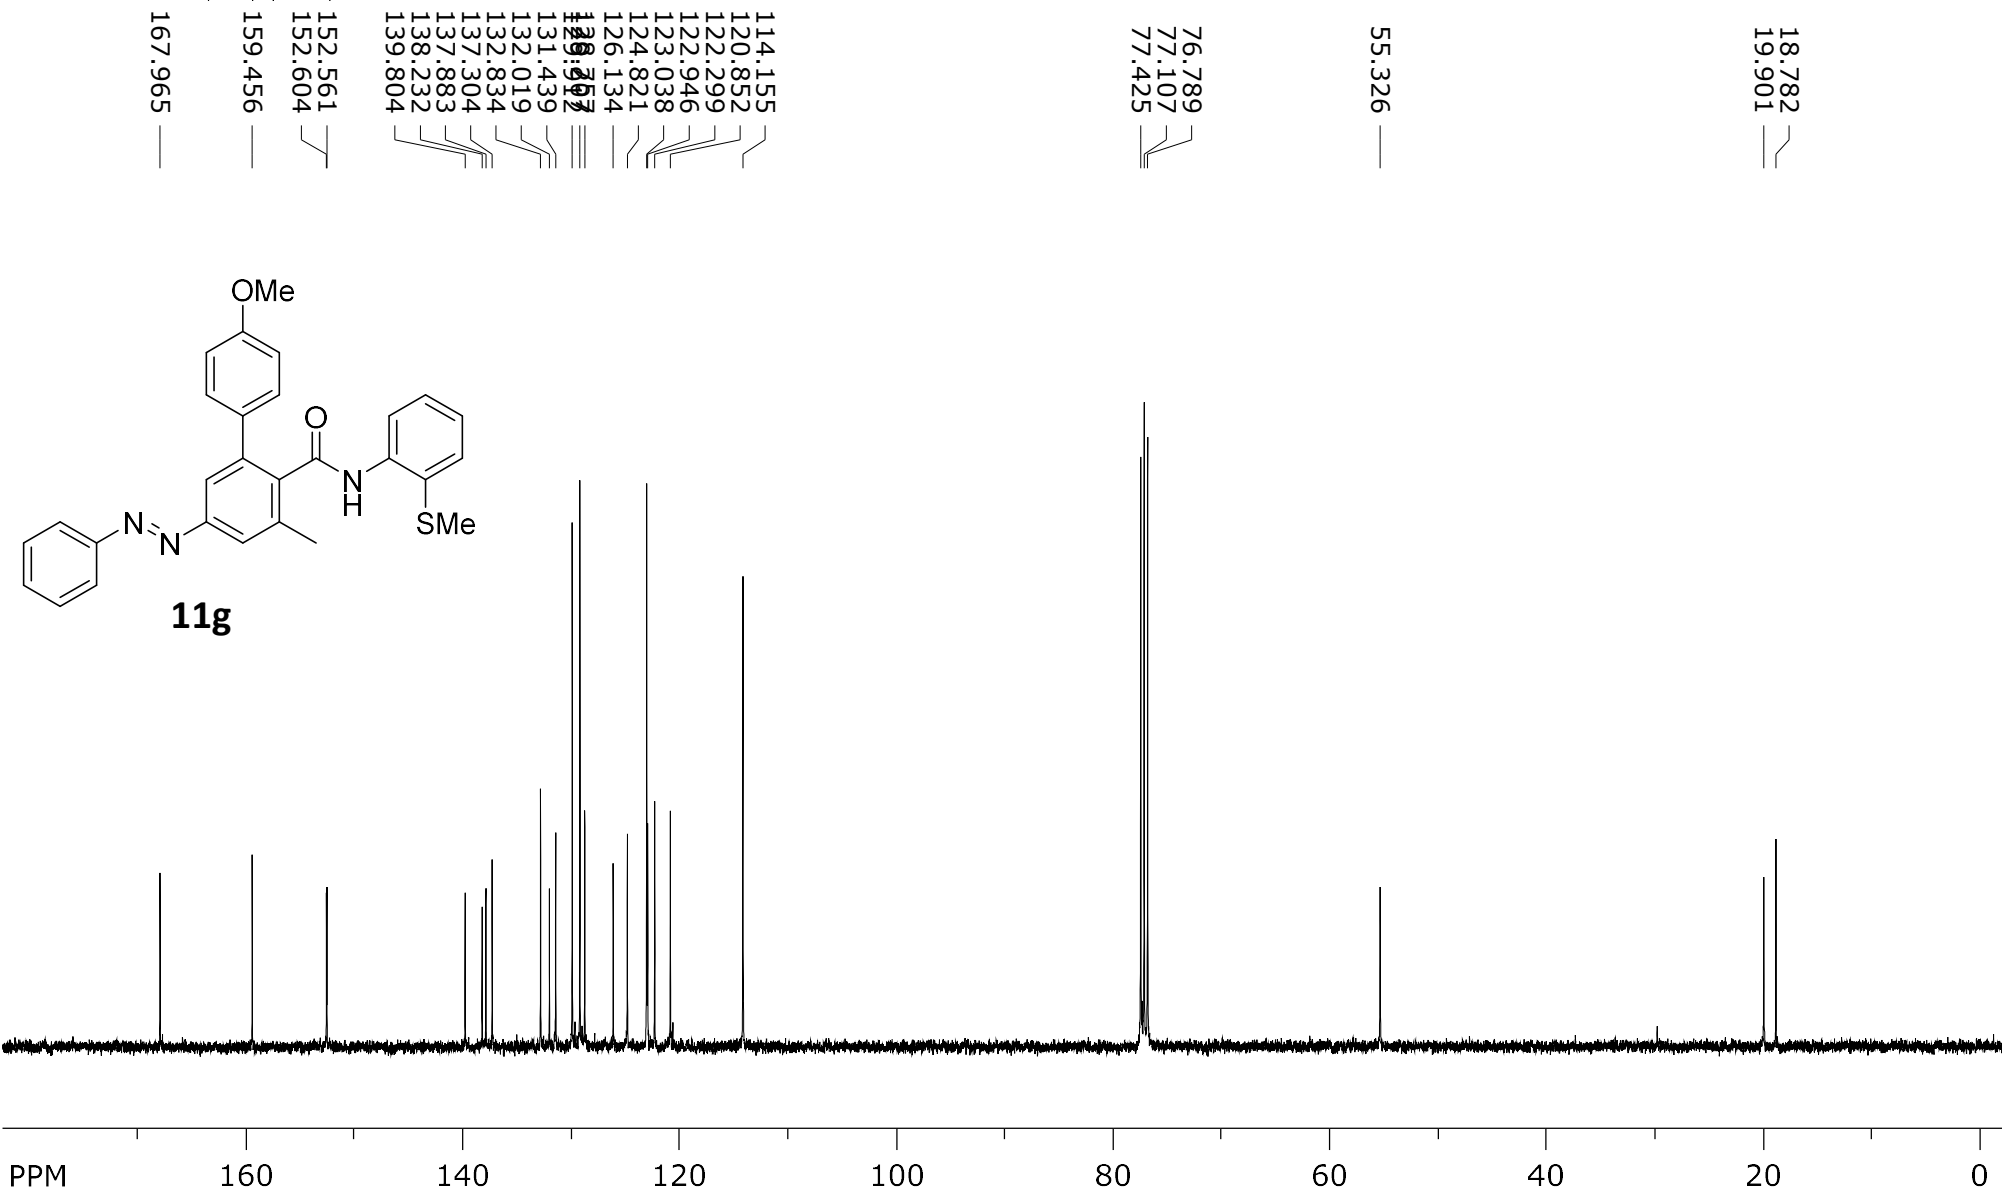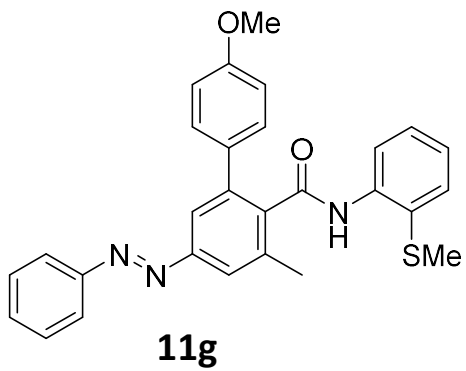



SpinWorks 4: RP 1233 B2  
C13CPD256 CDCl3 /opt/topspin3.5pl2/nmrdata nmrsu 2

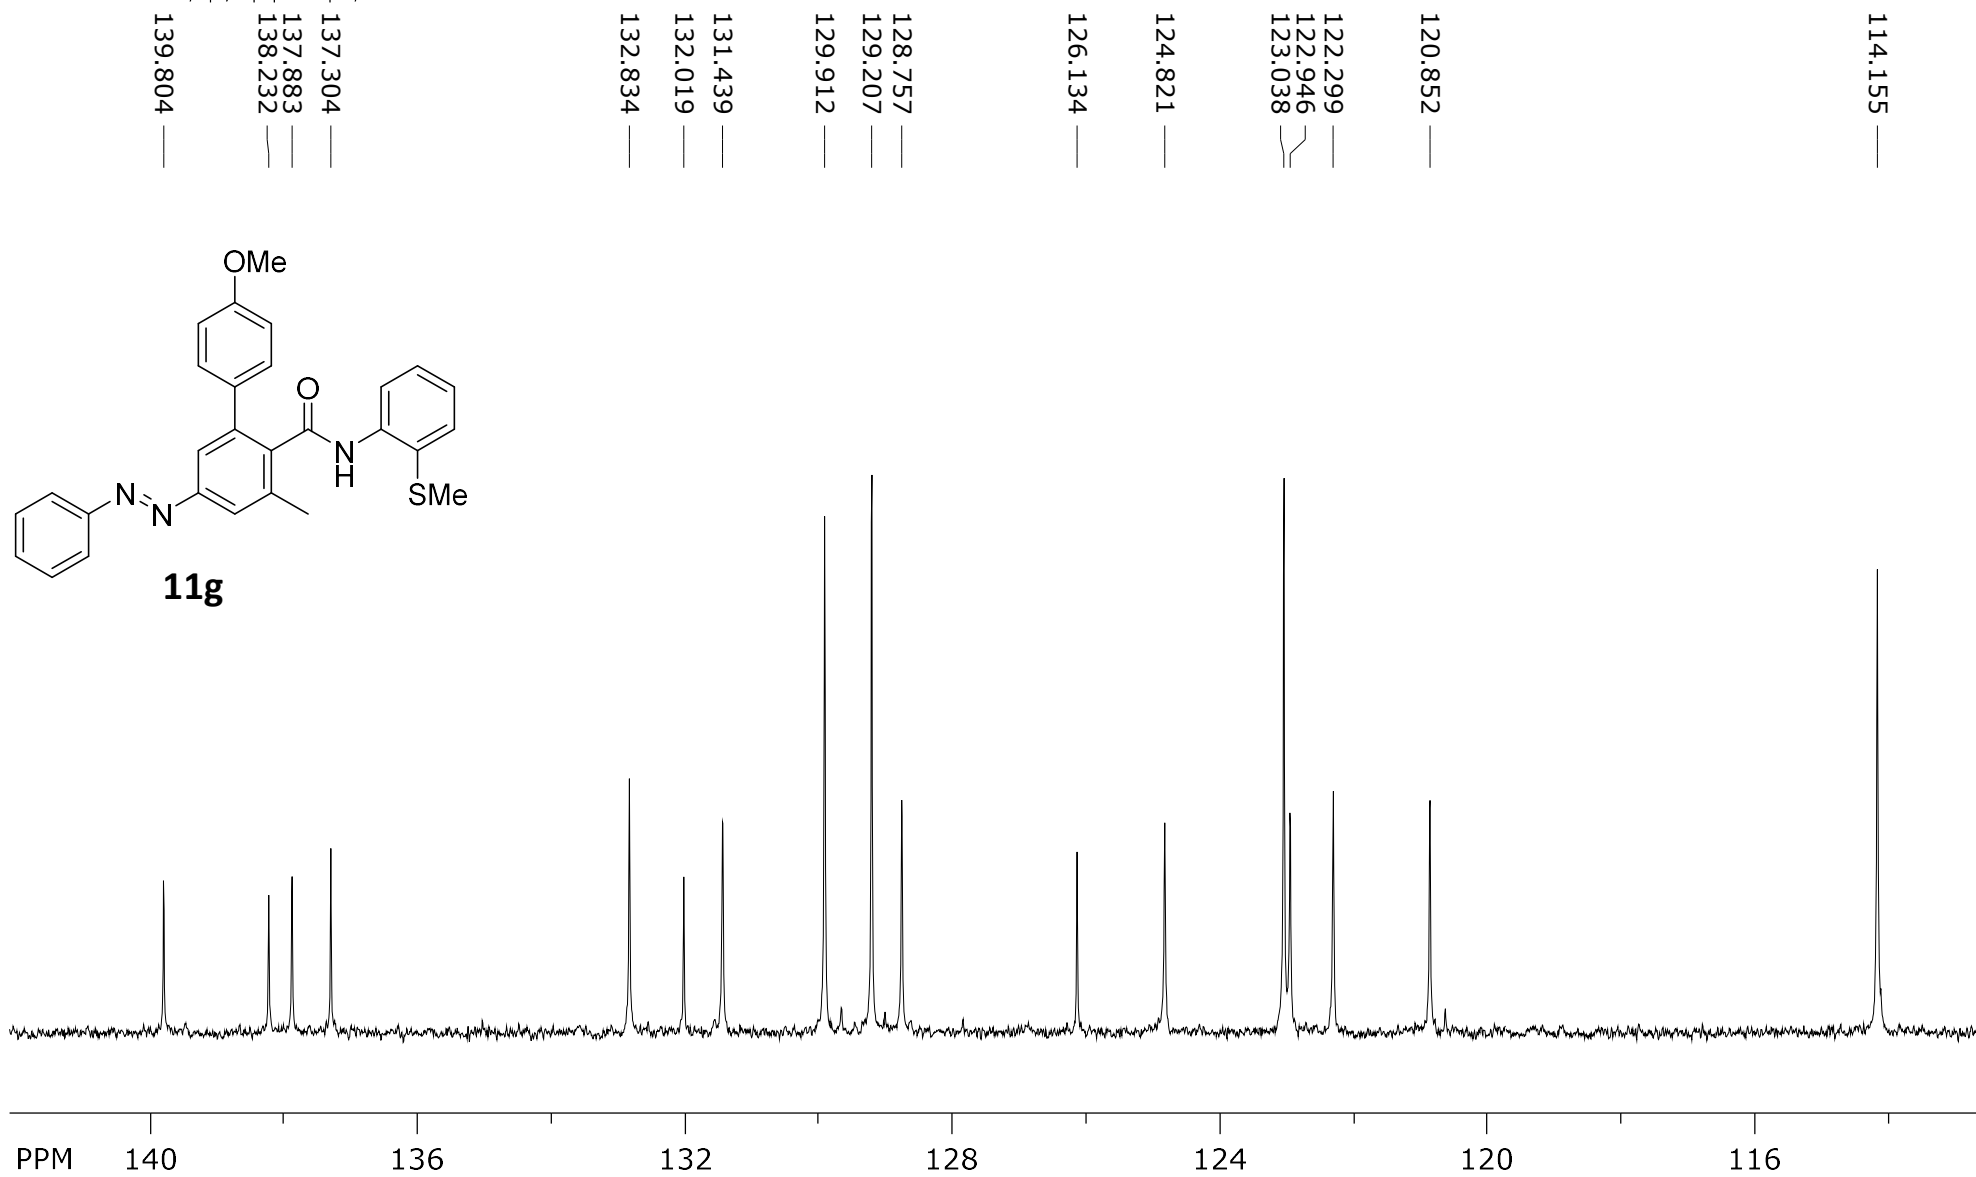

SpinWorks 4: RP 1399 A2  
PROTON CDCl3 /opt/topspin3.5pl2/nmrdata nmrsu 58

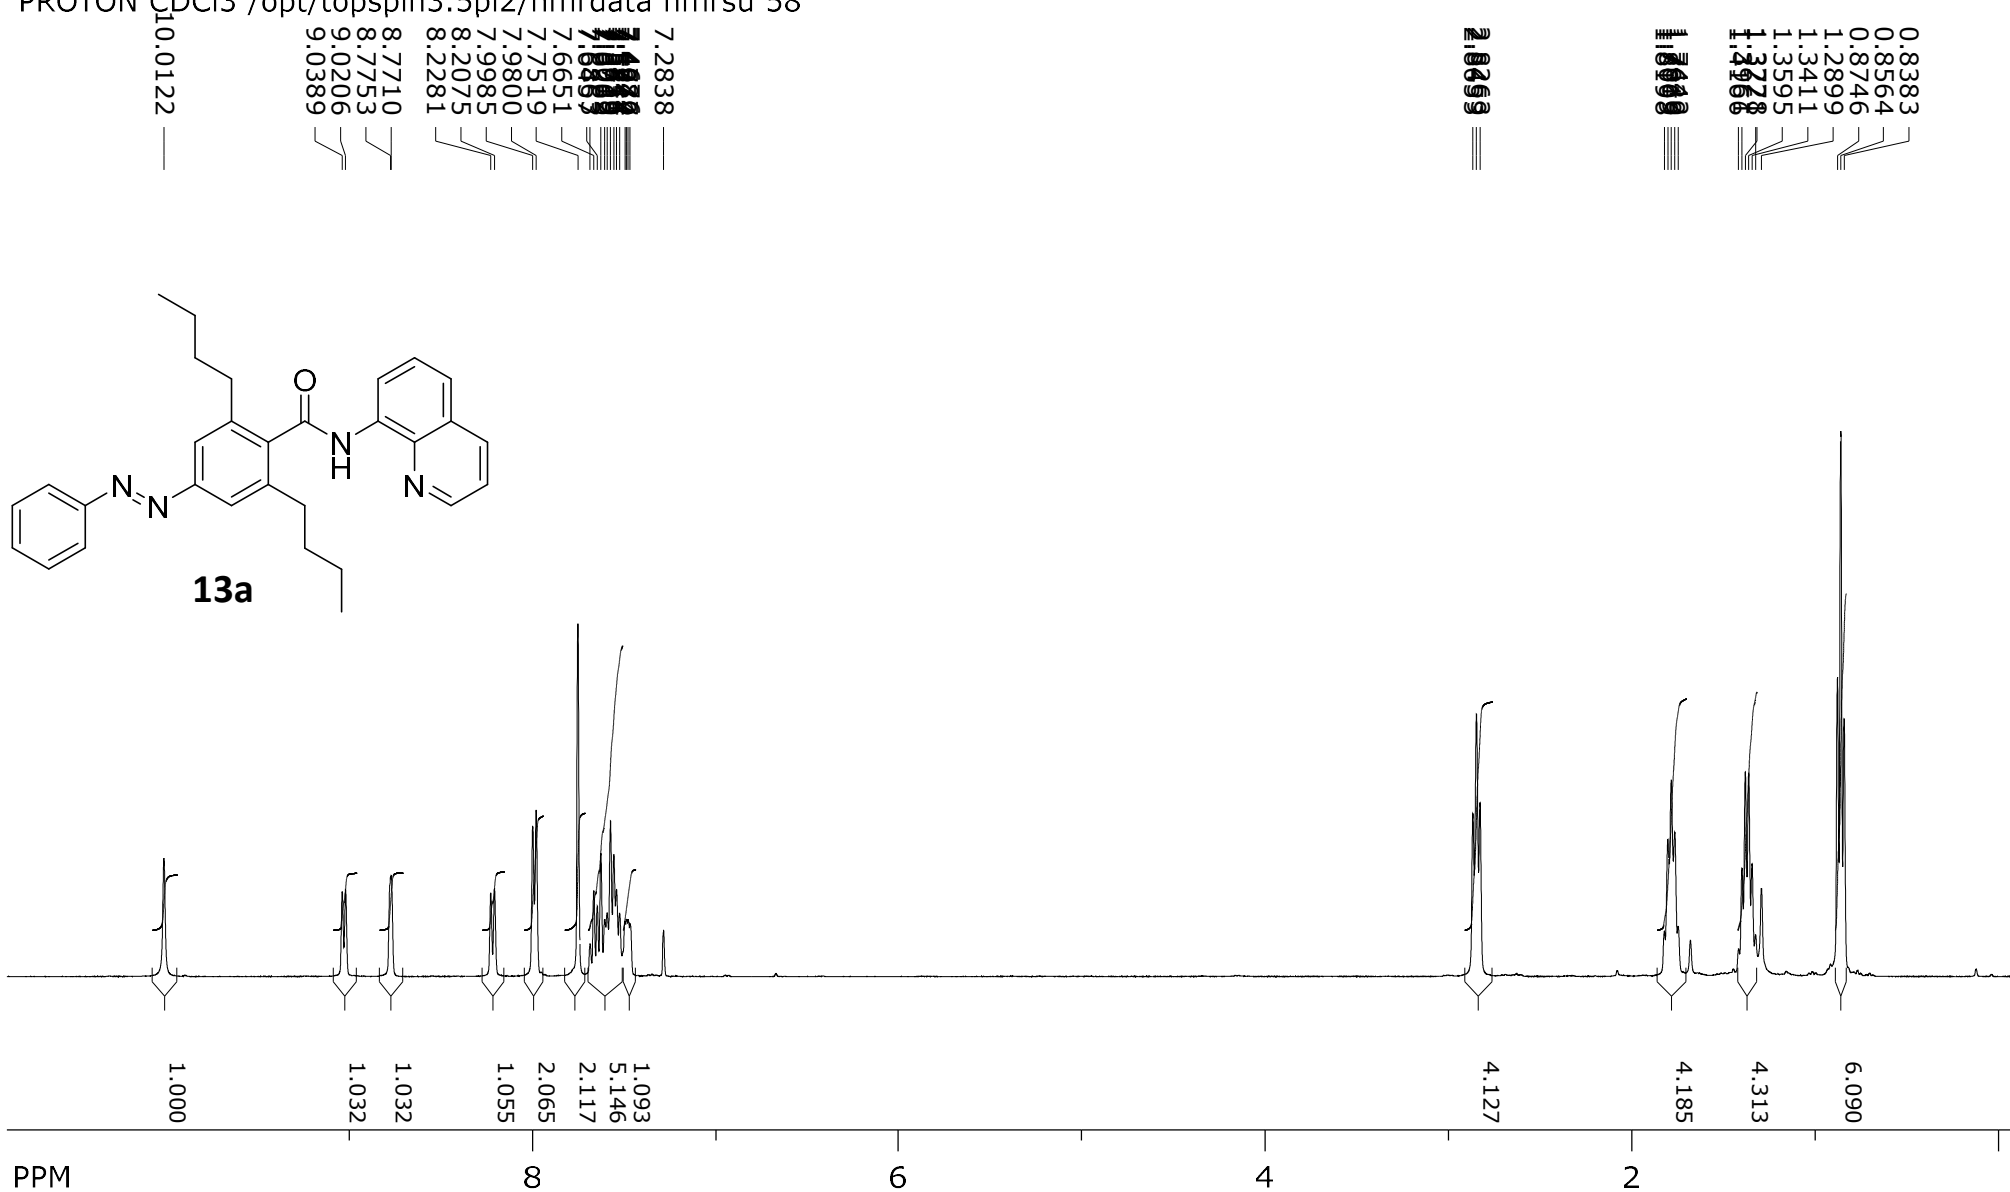

SpinWorks 4: RP 1399 A2  
PROTON CDCl3 /opt/topspin3.5pl2/nmrdata nmrsu 58

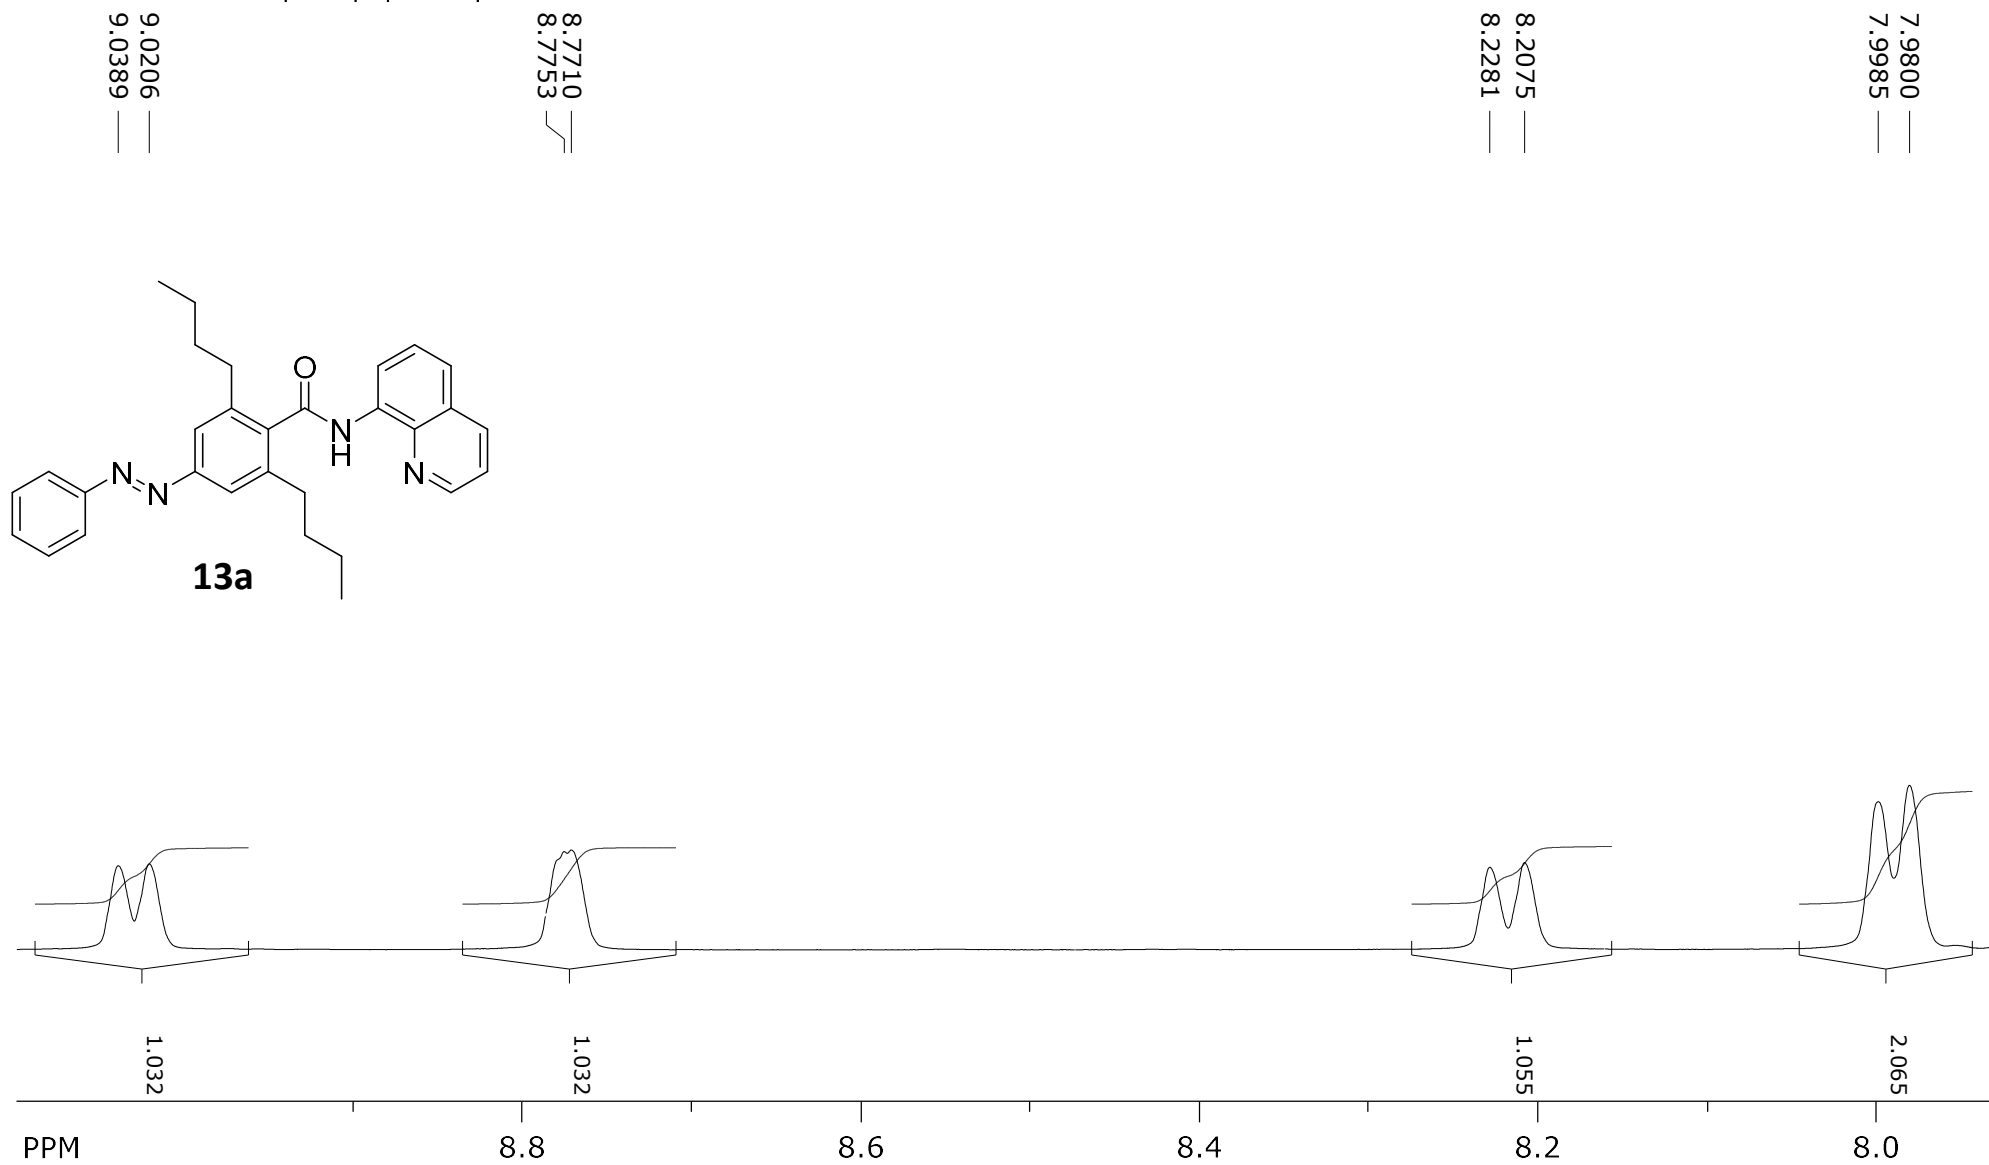

SpinWorks 4: RP 1399 A2

PROTON CDCl3 /opt/topspin3.5pl2/nmrdata nmrsu 58

7.7519 —  
7.6863 —  
7.6651 —  
7.6457 —  
7.6269 —  
7.6062 —  
7.5919 —  
7.5739 —  
7.5555 —  
7.5411 —  
7.5244 —  
7.4944 —  
7.4879 —  
7.4787 —  
7.4676 —  
7.2838 —

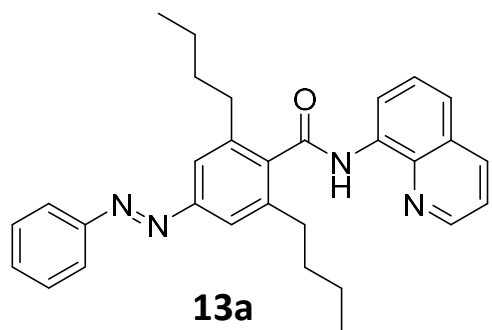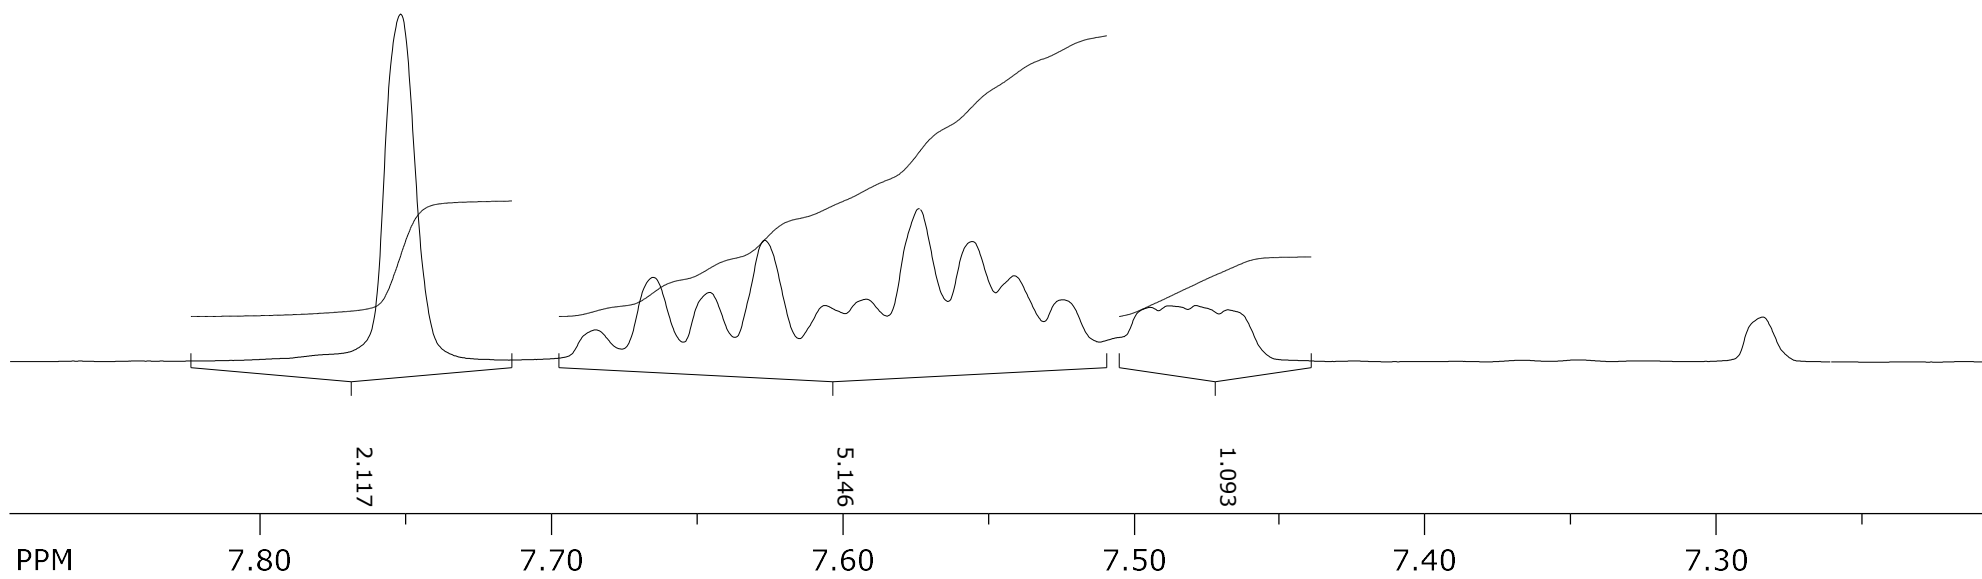

SpinWorks 4: RP 1399 A2  
PROTON CDCl3 /opt/topspin3.5pl2/nmrdata nmrsu 58

2.8263  
2.8459  
2.8653

1.7442  
1.7629  
1.7819  
1.8009  
1.8198

1.2899  
1.3441  
1.3595  
1.3778  
1.3961  
1.4166

0.8383  
0.8564  
0.8746

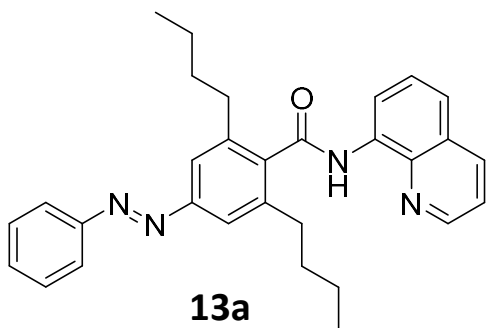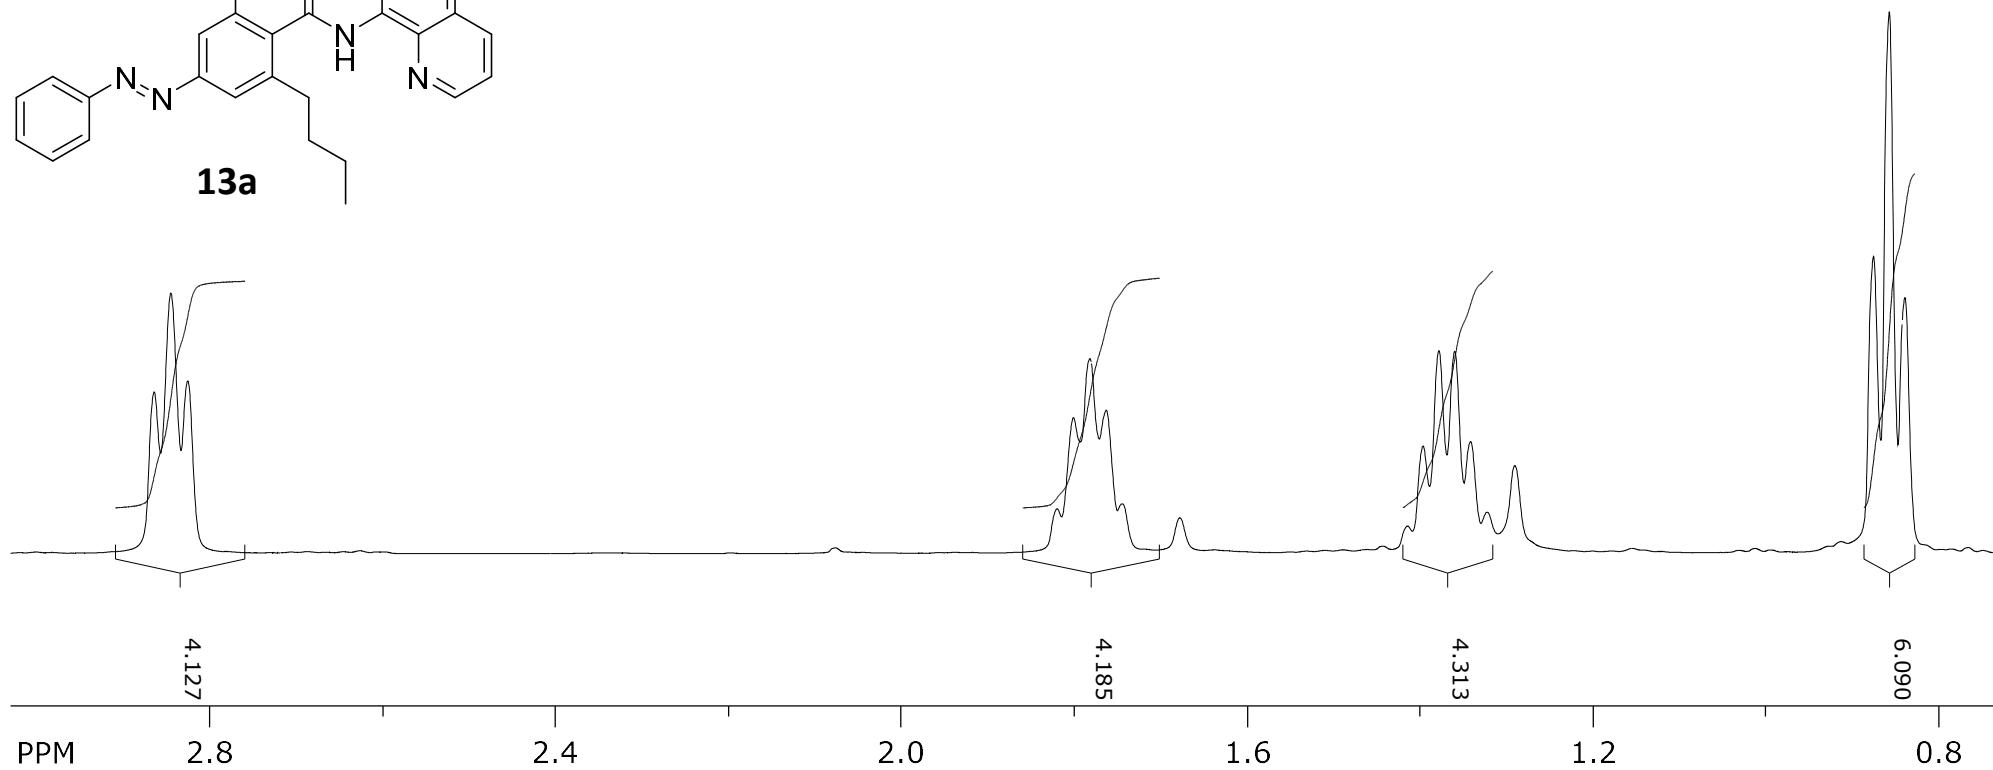

SpinWorks 4: RP 1399 A2  
PROTON CDCl3 /opt/topspin3.5pl2/nmrdata nmrsu 58

2.8263  
2.8459  
2.8653

1.7442  
1.7629  
1.7819  
1.8009  
1.8198

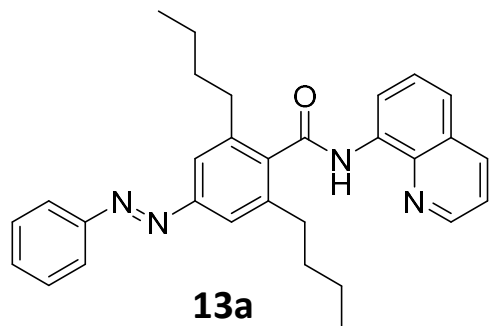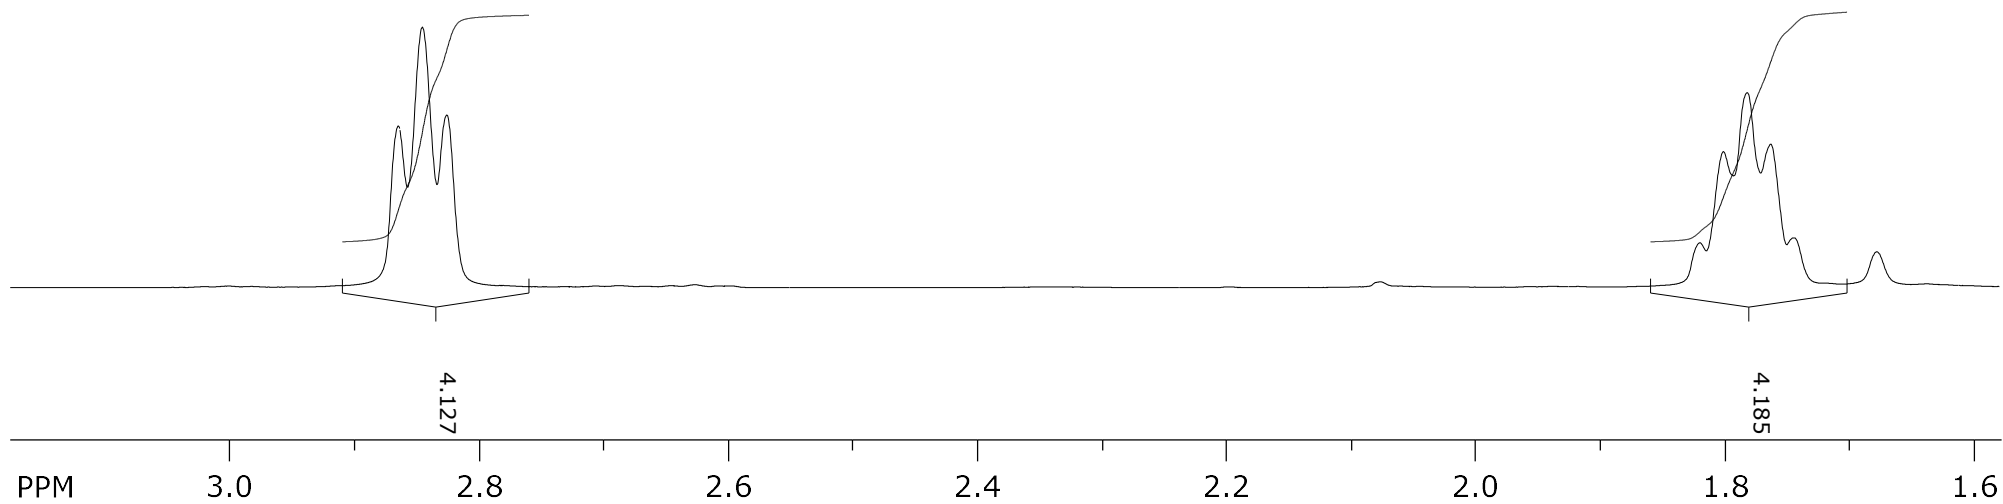

SpinWorks 4: RP 1399 A2  
PROTON CDCl3 /opt/topspin3.5pl2/nmrdata nmrsu 58

1.4166  
1.3961  
1.3778  
1.3595  
1.3411  
1.3221  
1.2899

0.8383  
0.8564  
0.8746

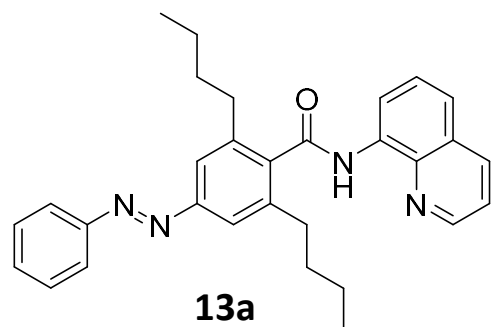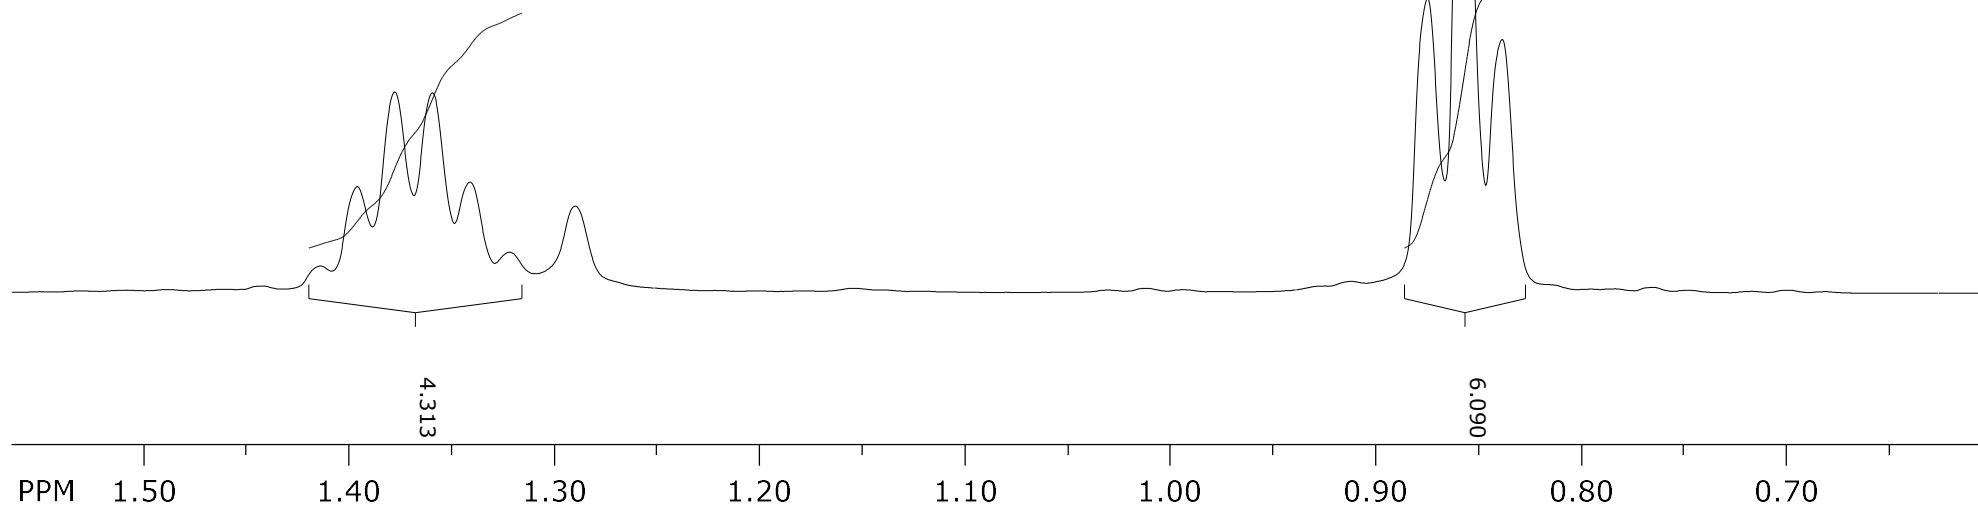

SpinWorks 4: RP 1399 A2  
C13CPD CDCl3 /opt/topspin3.5pl2/nmrdata nmrsu 58

168.274 —  
152.758 —  
148.354 —  
140.860 —  
139.612 —  
138.507 —  
136.373 —  
134.298 —  
131.157 —  
129.157 —  
128.048 —  
127.475 —  
122.938 —  
122.094 —  
121.769 —  
121.223 —  
116.849 —  
76.751 —  
77.069 —  
77.386 —  
33.284 —  
33.666 —  
22.708 —  
13.911 —

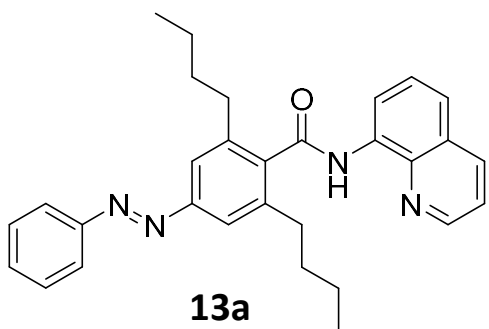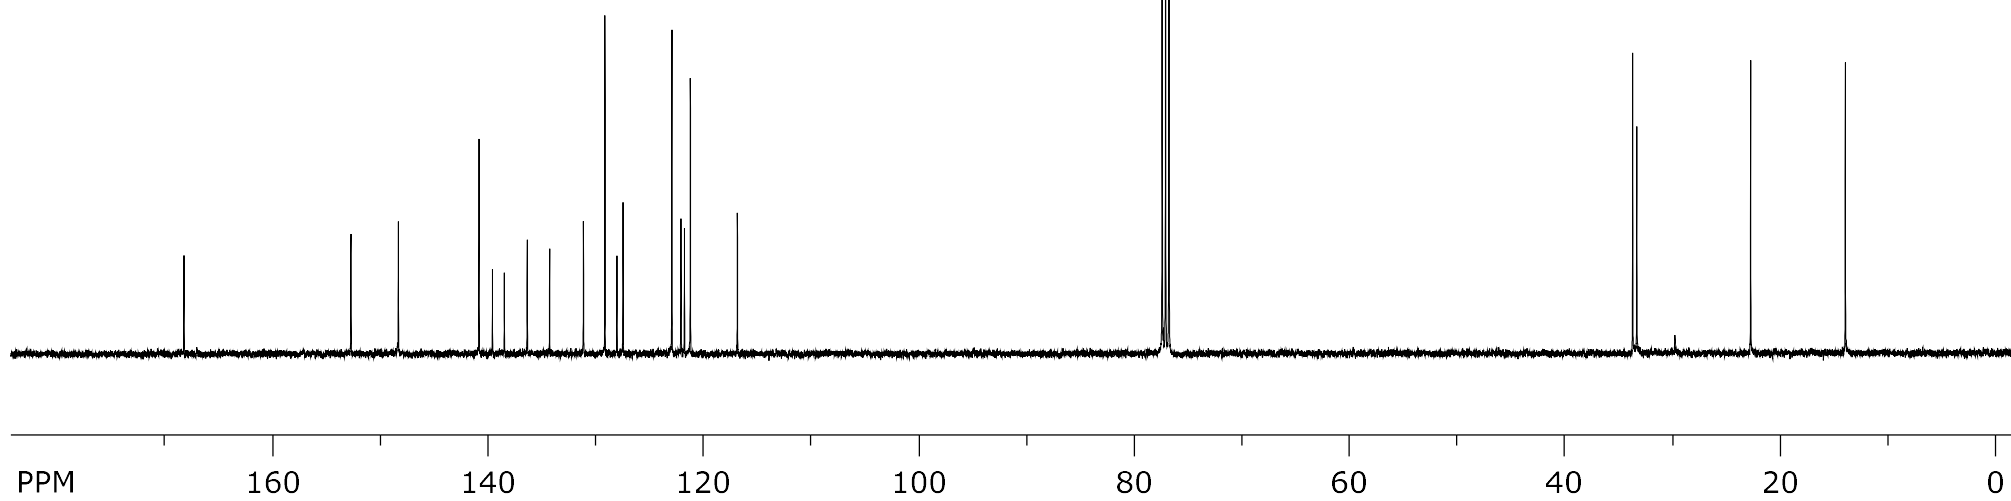



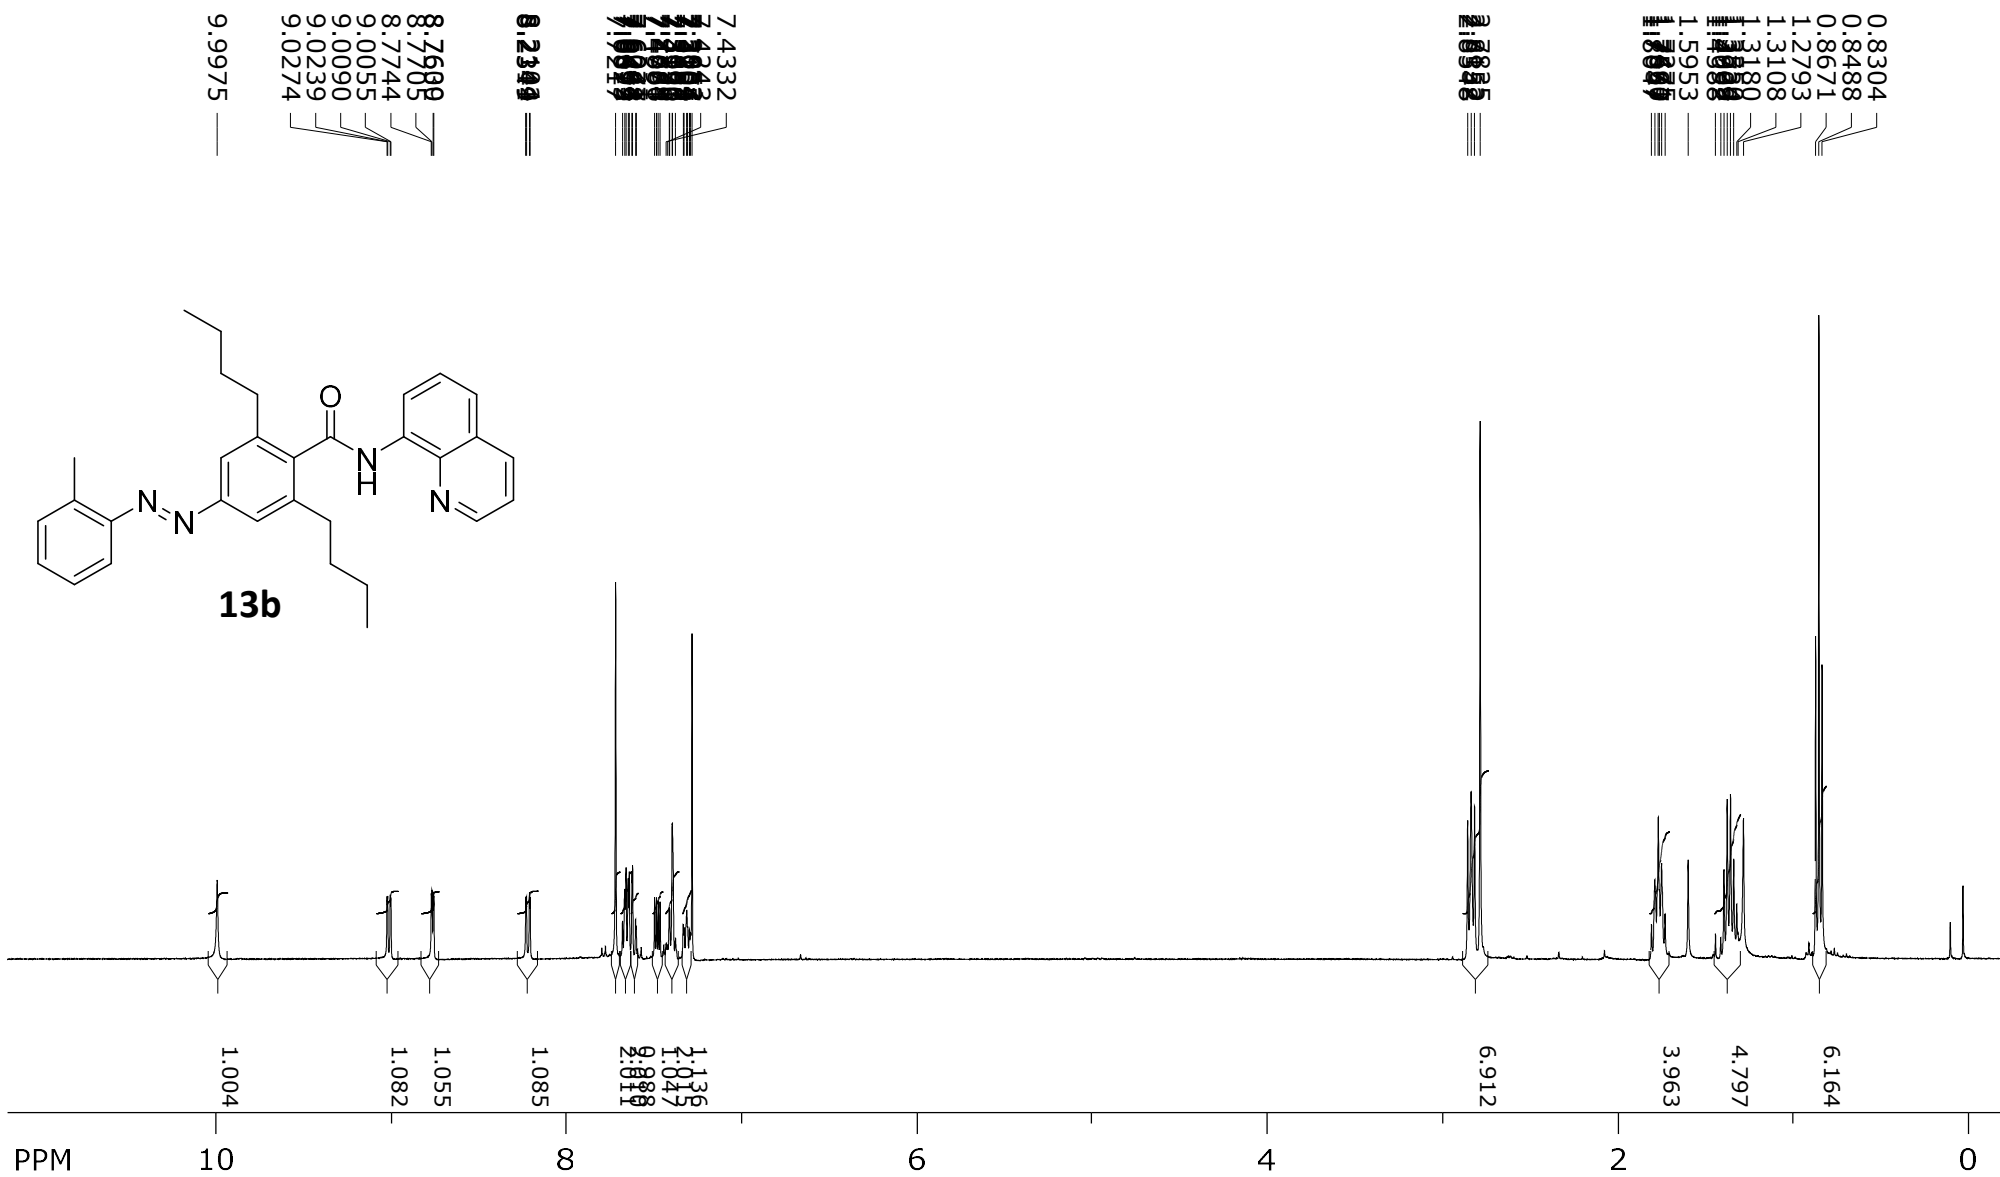

9.0055  
9.0090  
9.0239  
9.0274

8.7600  
8.7639  
8.7705  
8.7744

8.2104  
8.2142  
8.2311  
8.2349

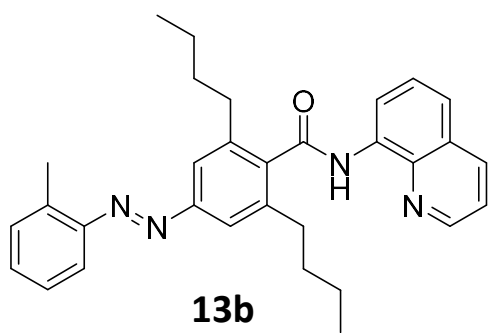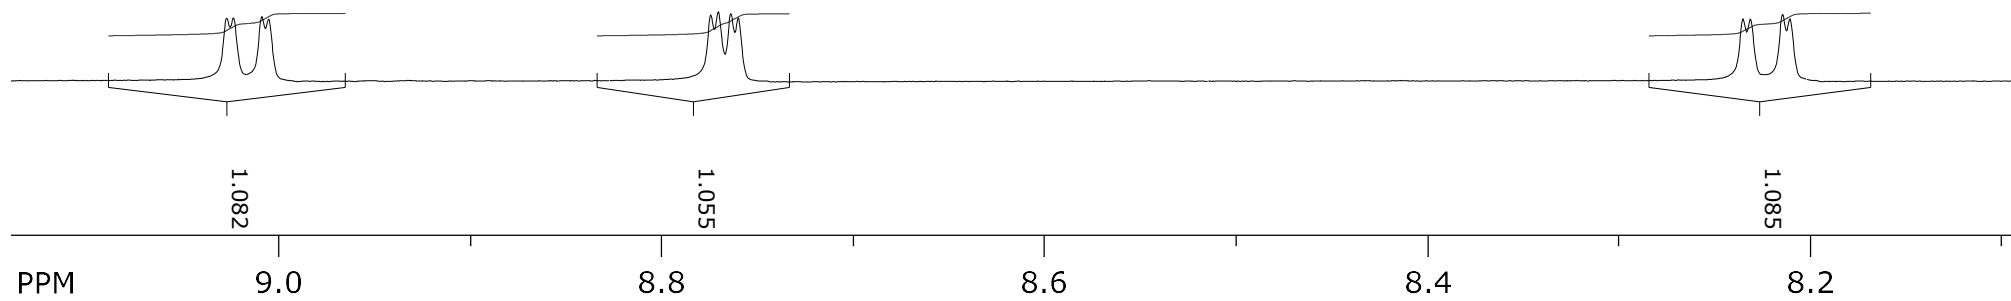

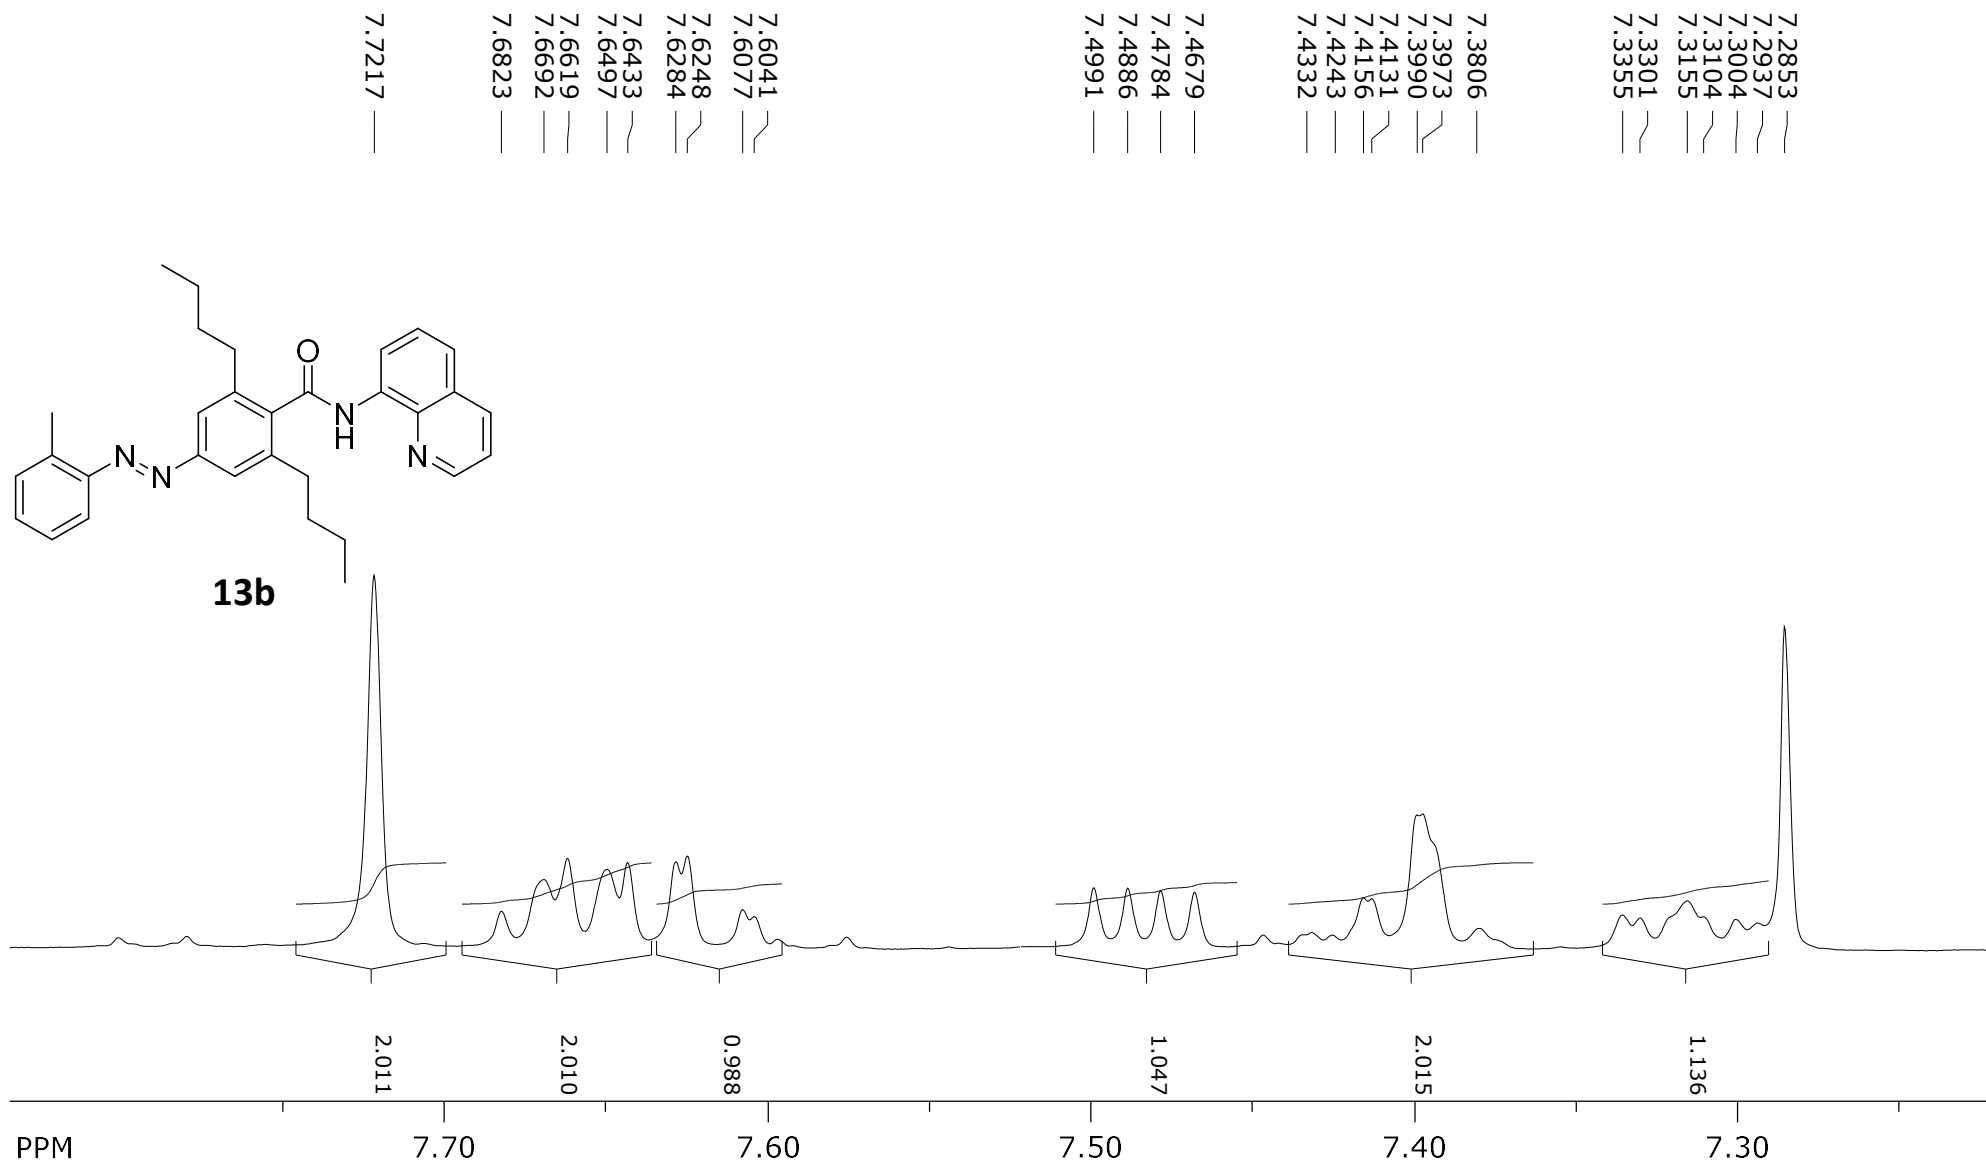

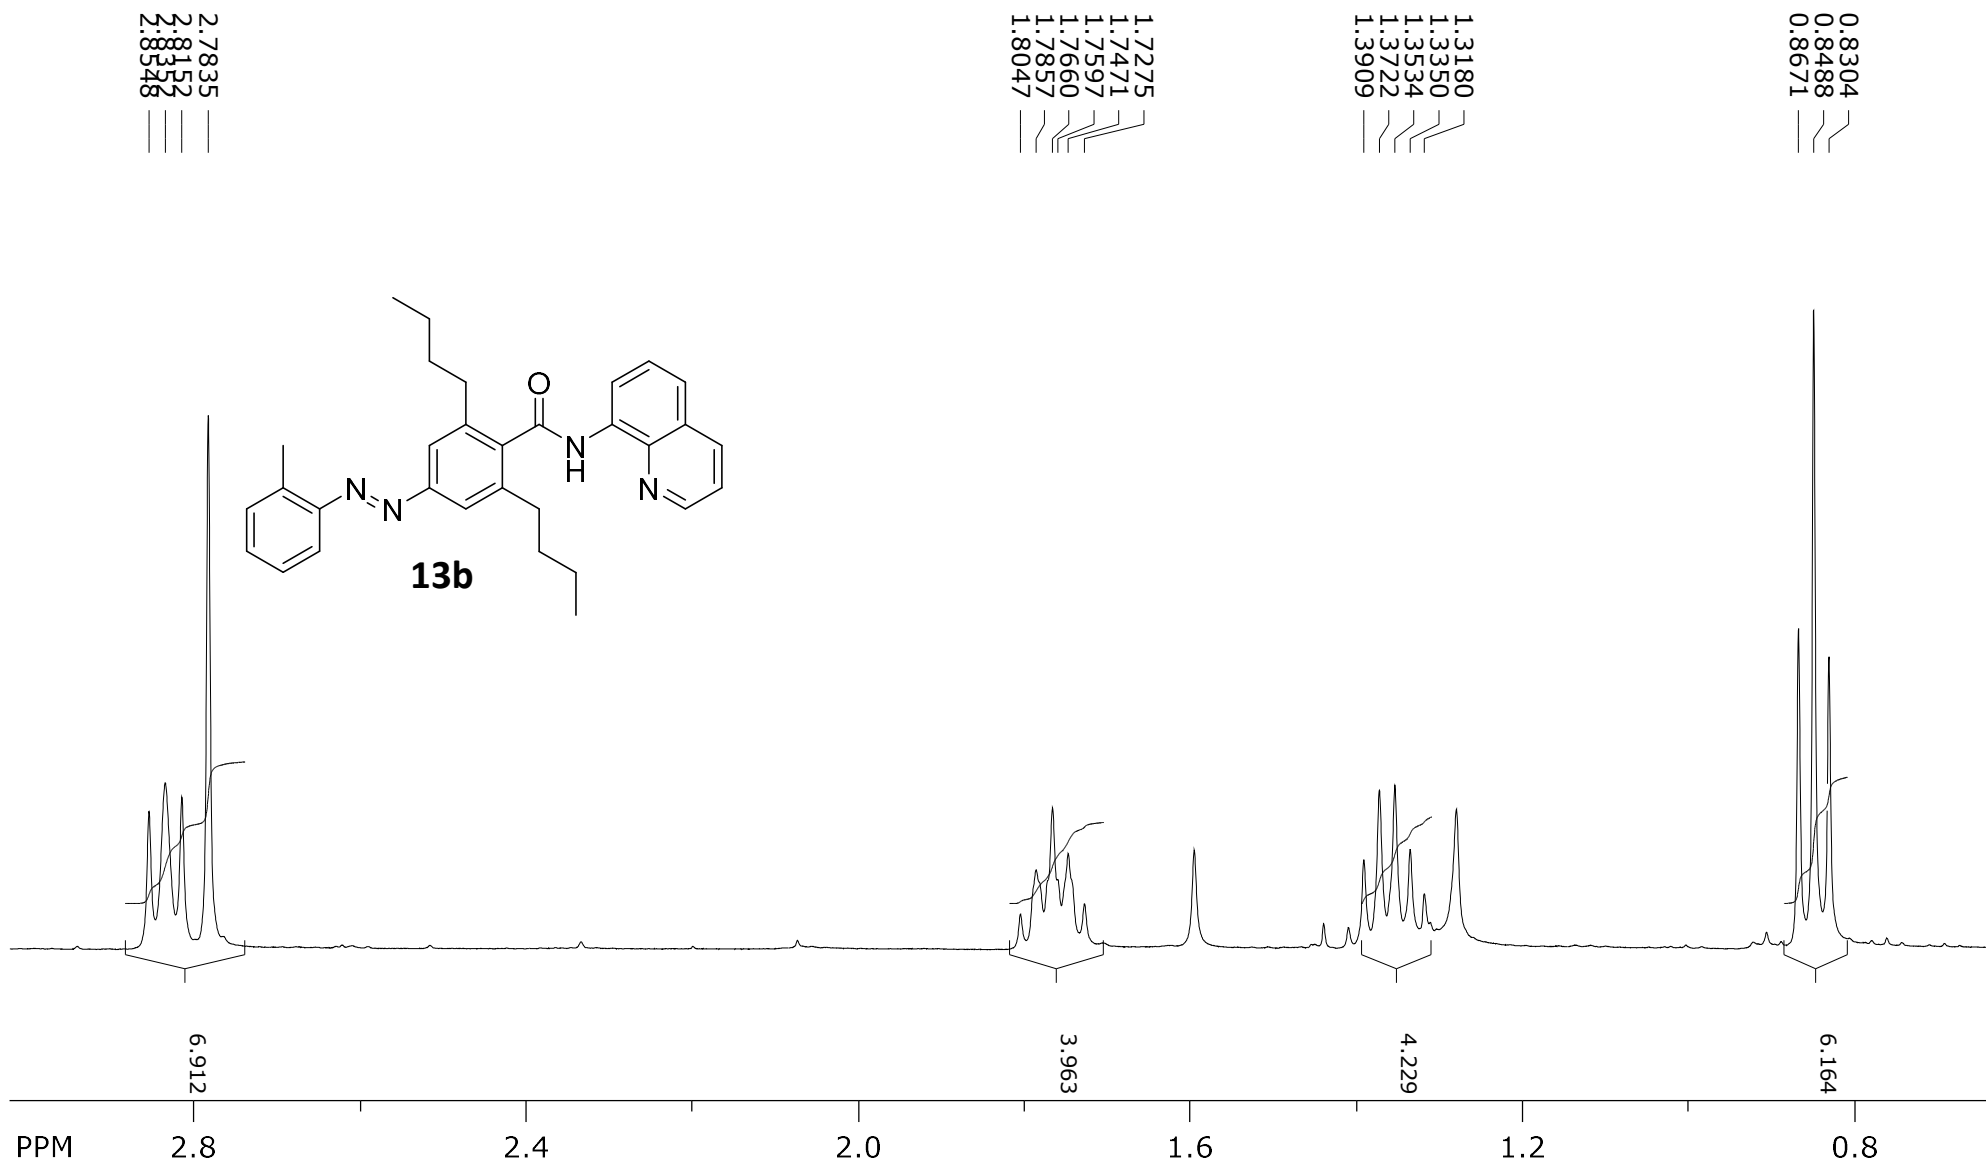

SpinWorks 4: rp-1415a2  
C13CPD256 CDCl3 /opt/topspin3.5pl2/nmrdata nmrsu 43

|         |         |         |         |         |         |         |         |         |         |         |         |         |         |         |         |         |         |         |         |        |        |        |        |        |        |        |        |
|---------|---------|---------|---------|---------|---------|---------|---------|---------|---------|---------|---------|---------|---------|---------|---------|---------|---------|---------|---------|--------|--------|--------|--------|--------|--------|--------|--------|
| 168.296 | 153.125 | 150.882 | 148.338 | 140.792 | 139.444 | 138.502 | 138.221 | 136.366 | 134.309 | 131.313 | 131.087 | 128.043 | 127.474 | 126.487 | 122.074 | 121.760 | 121.272 | 116.831 | 115.502 | 77.382 | 77.064 | 76.747 | 33.630 | 33.261 | 22.659 | 17.617 | 13.900 |
|---------|---------|---------|---------|---------|---------|---------|---------|---------|---------|---------|---------|---------|---------|---------|---------|---------|---------|---------|---------|--------|--------|--------|--------|--------|--------|--------|--------|

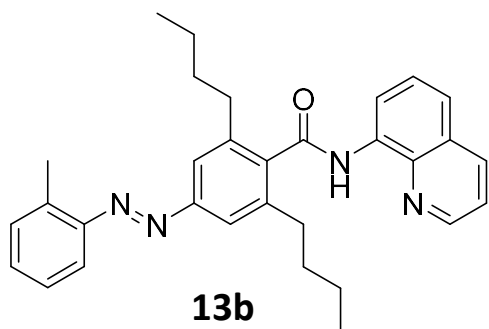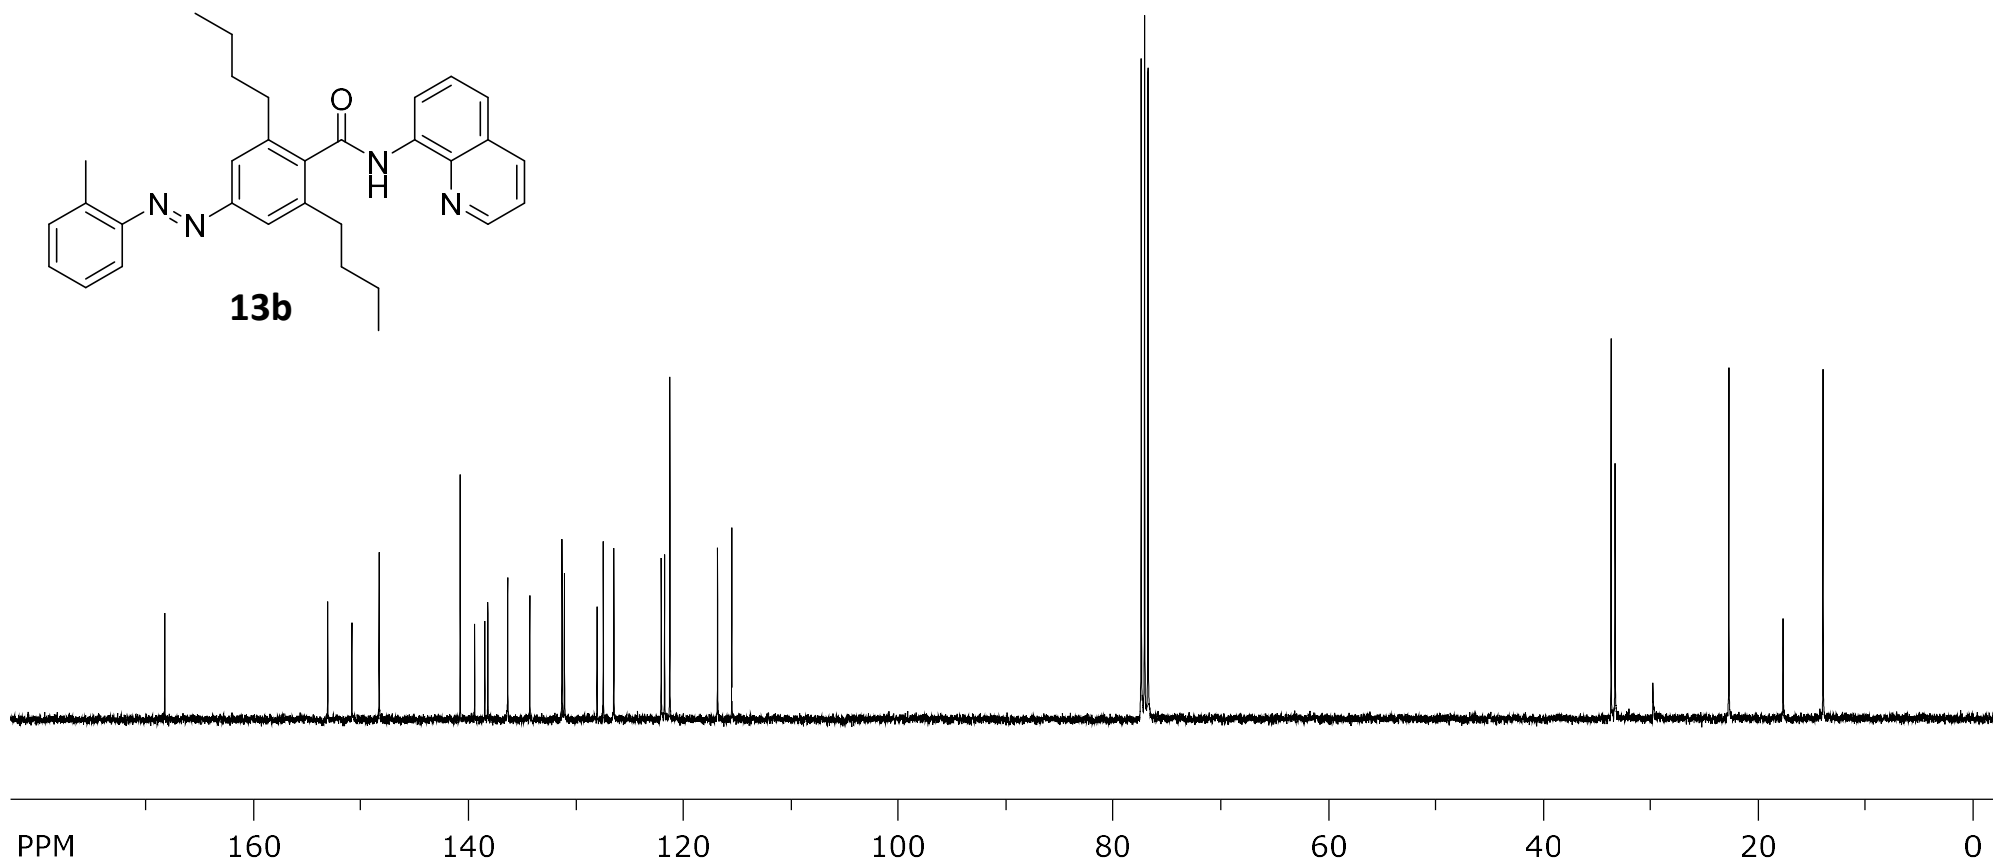

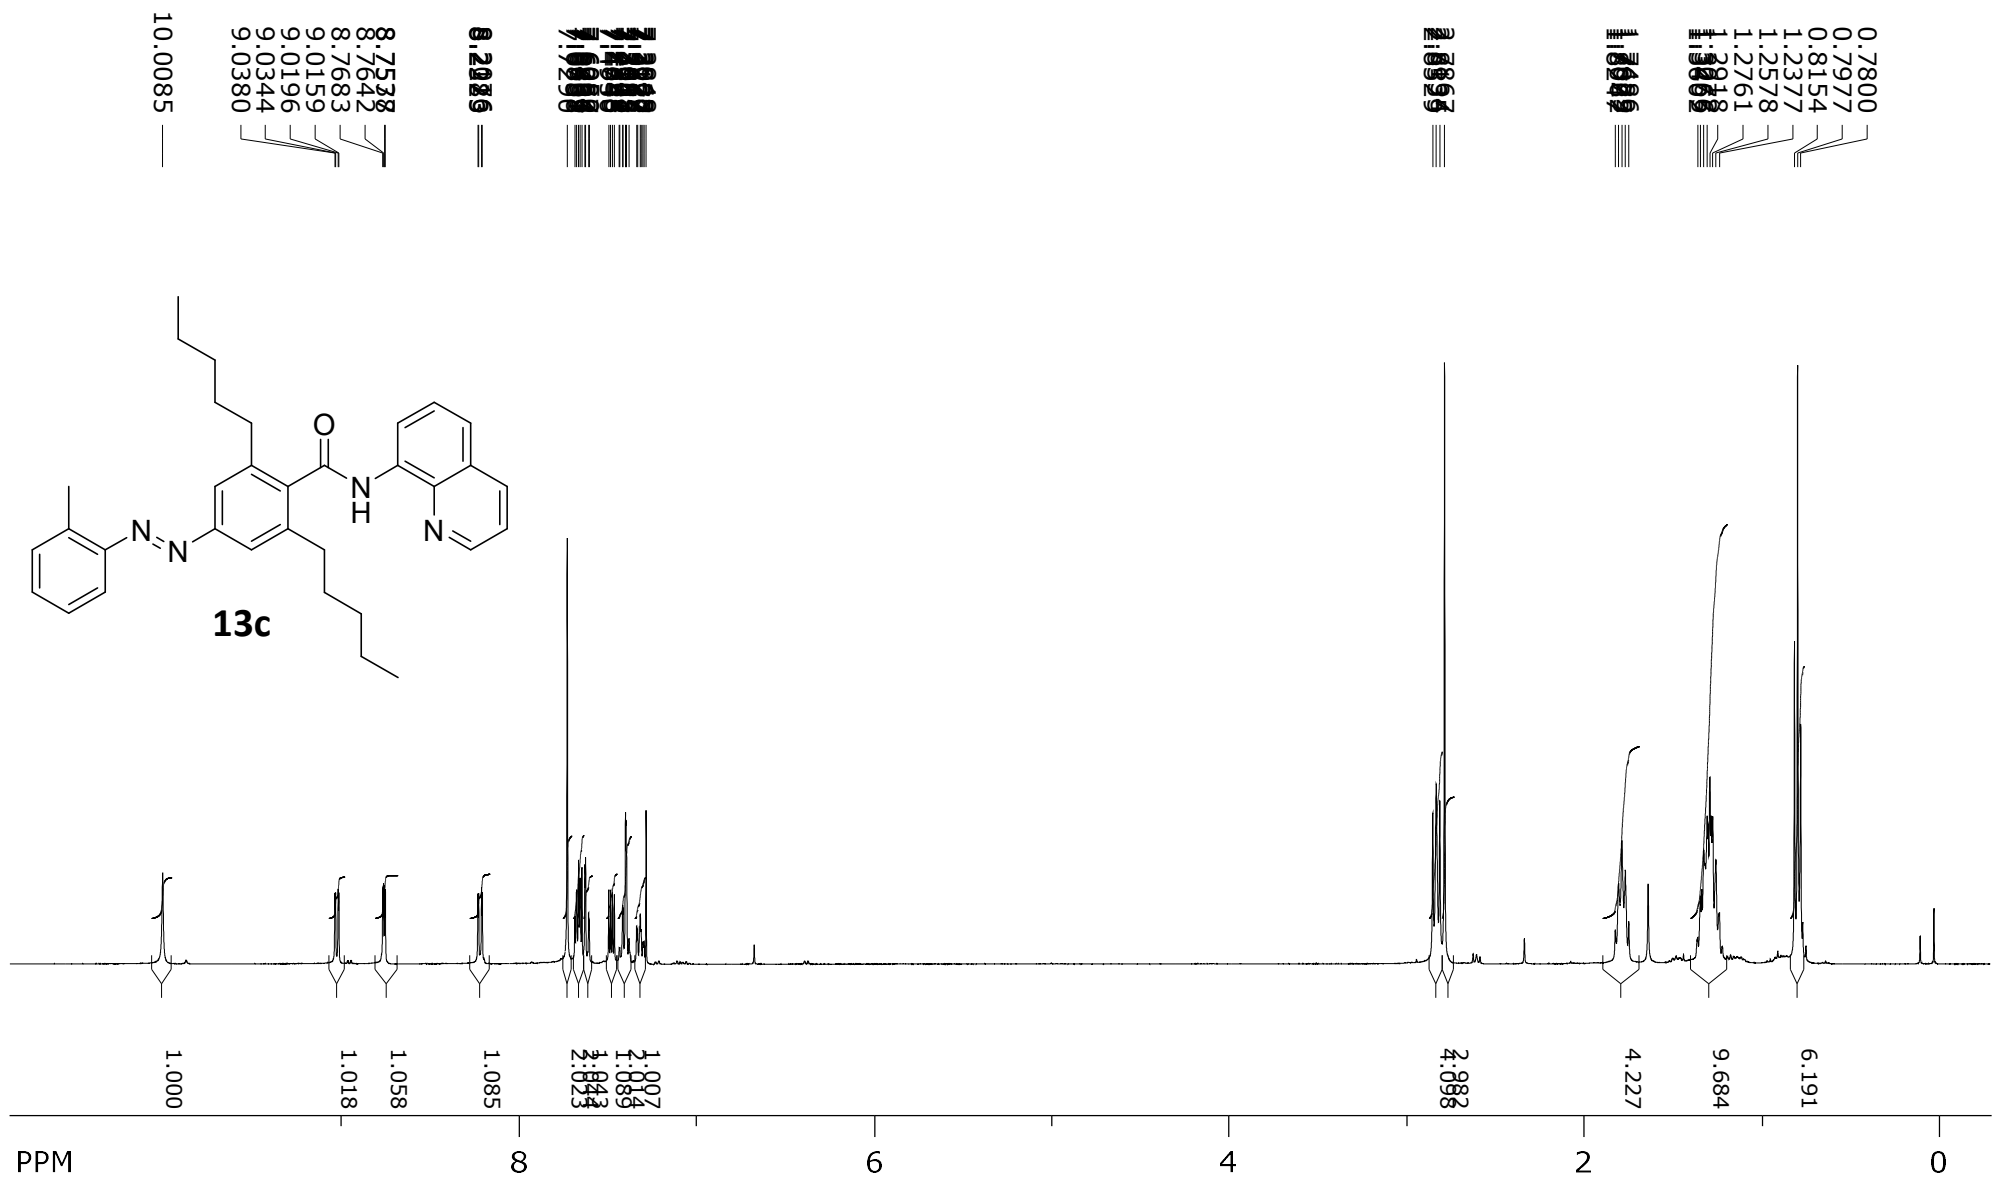

SpinWorks 4: rp-1438a2

9.0159  
9.0196  
9.0344  
9.0380

8.7537  
8.7578  
8.7642  
8.7683

8.2076  
8.2116  
8.2283  
8.2323

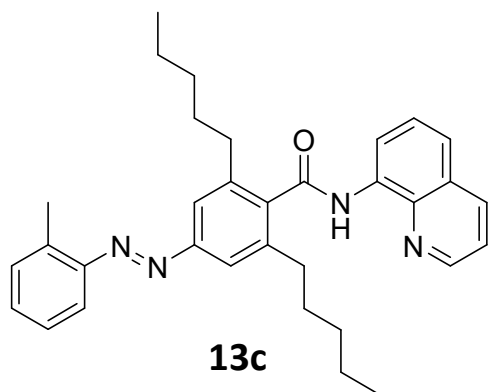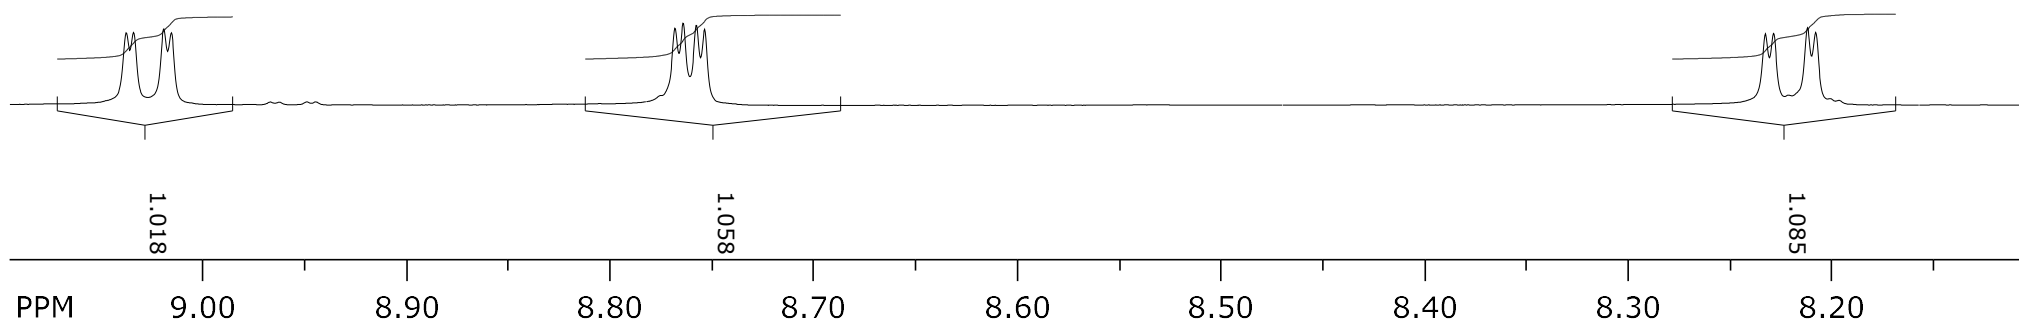

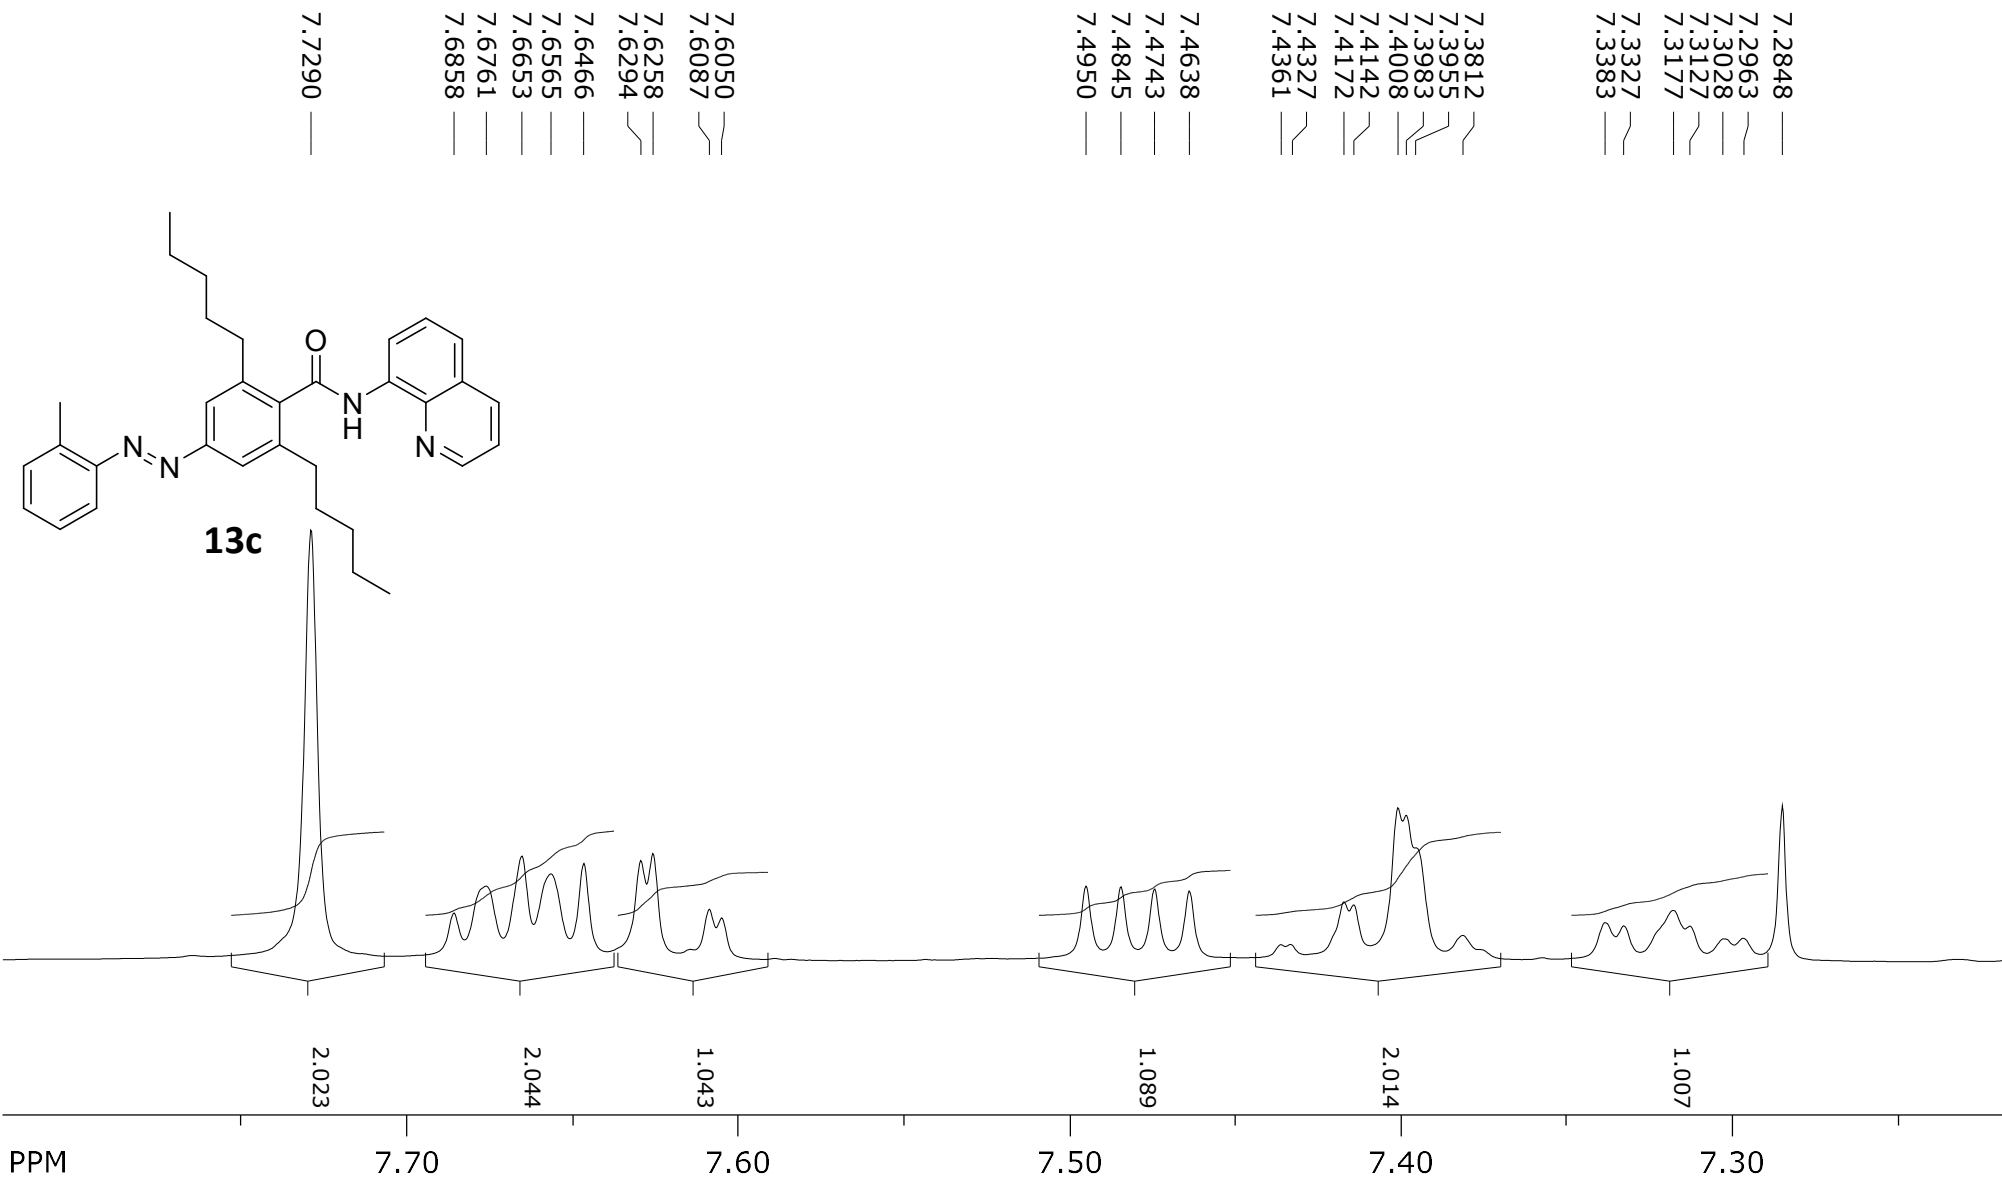



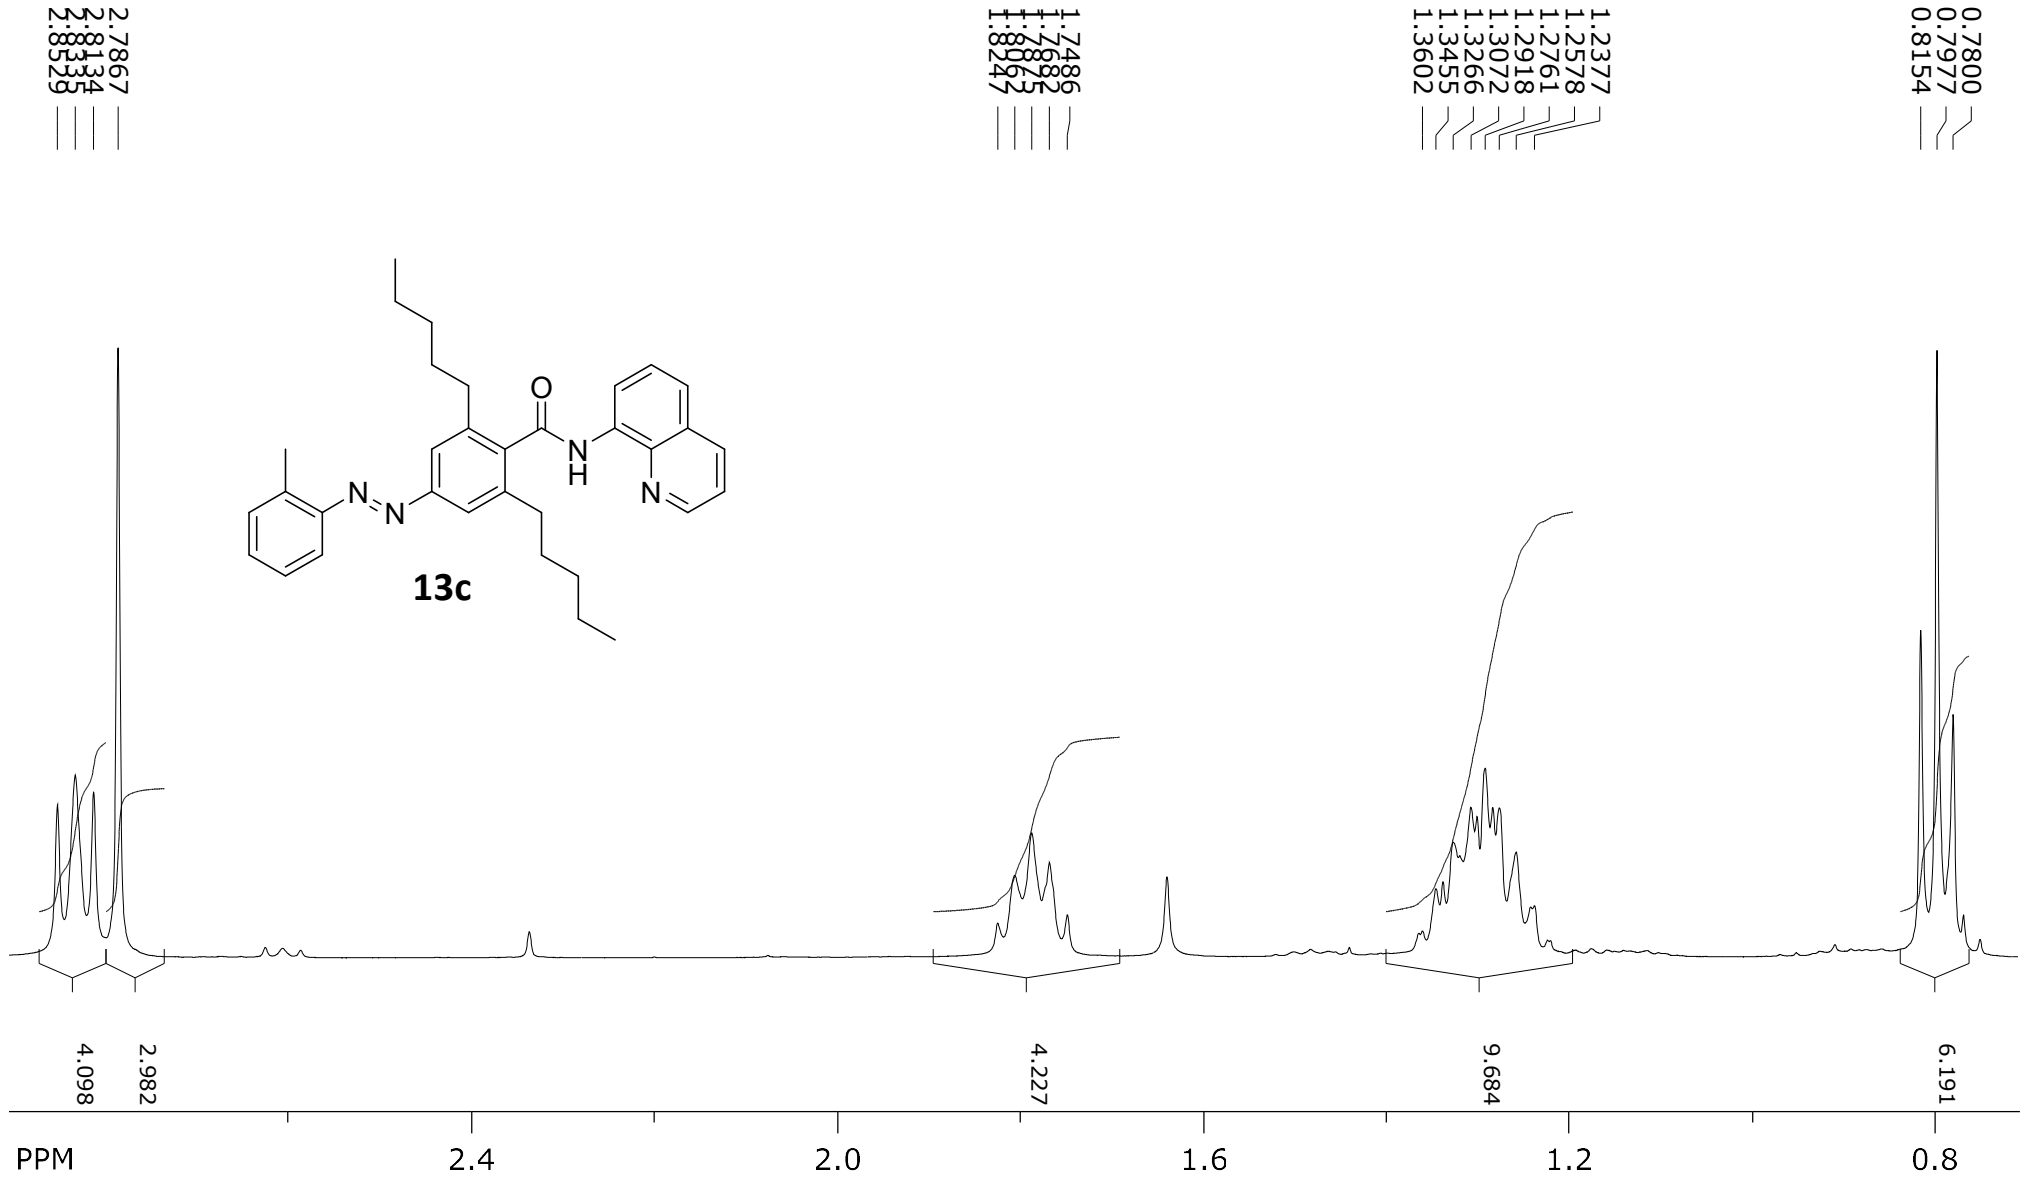

SpinWorks 4: RP 1438 R1  
C13CPD256 CDCl3 /opt/topspin3.5pl2/nmrdata nmrsu 51

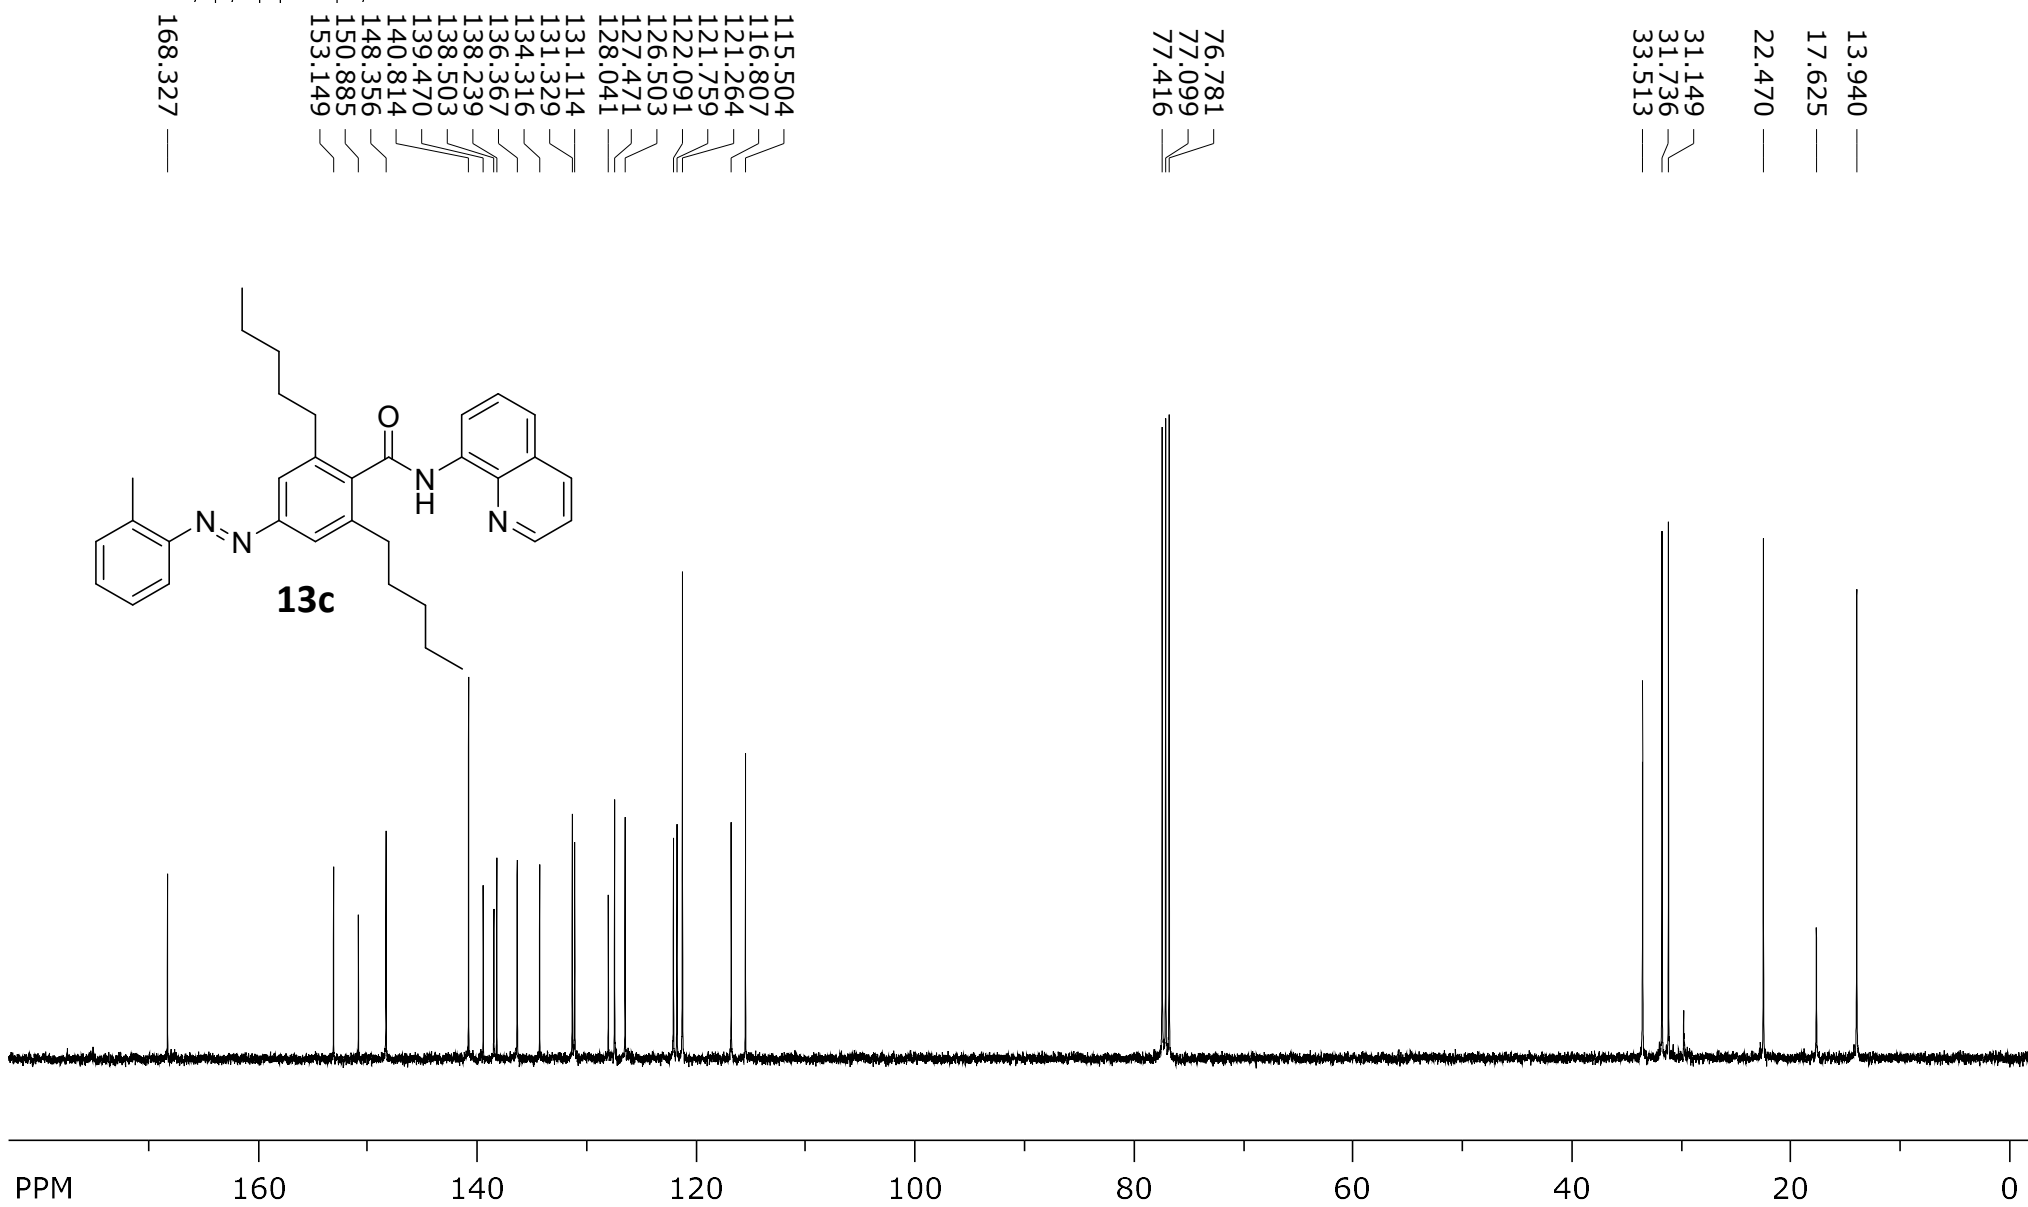

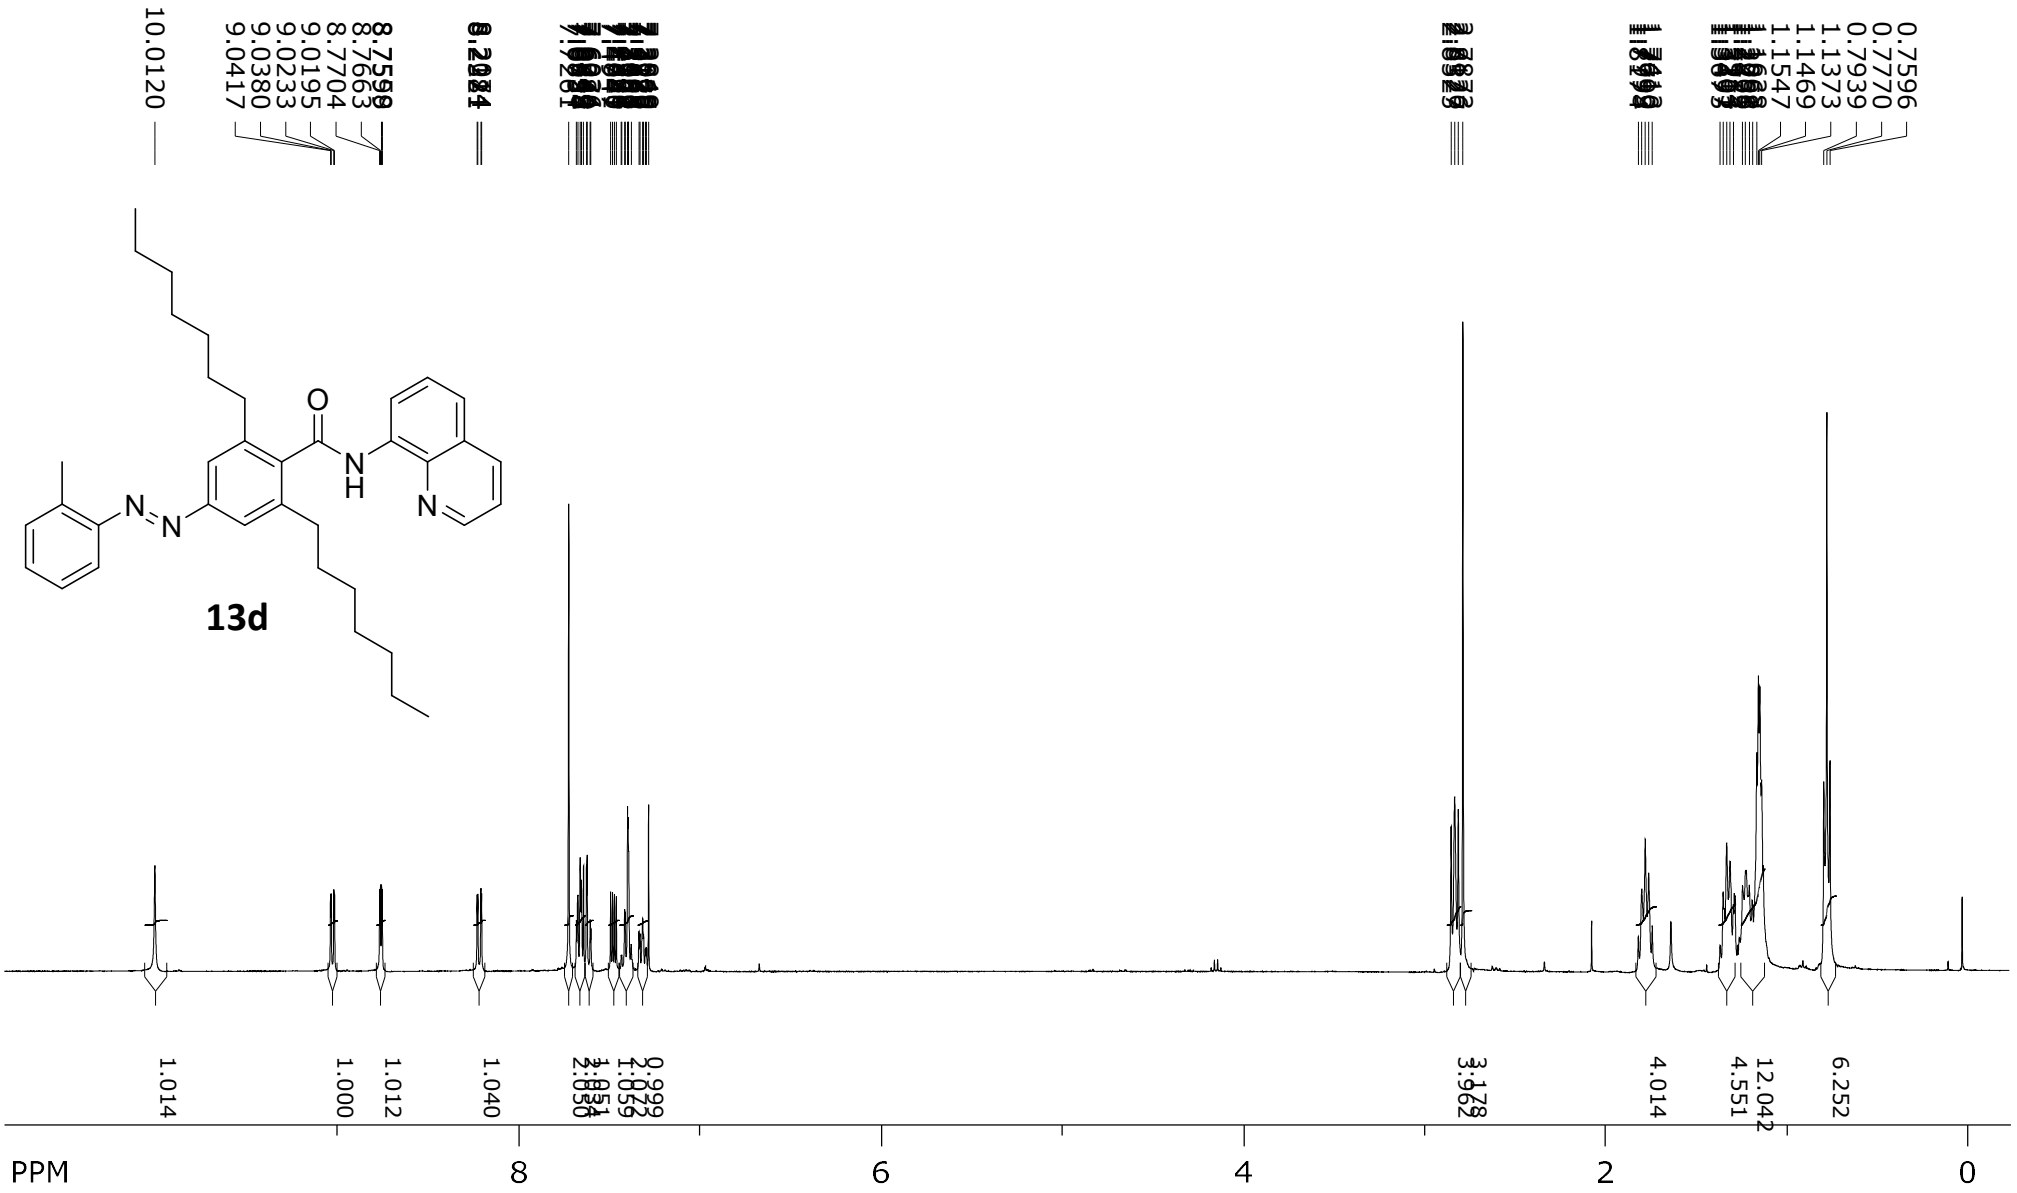

9.0195  
9.0233  
9.0380  
9.0417

8.7558  
8.7599  
8.7663  
8.7704

8.2074  
8.2114  
8.2281  
8.2321

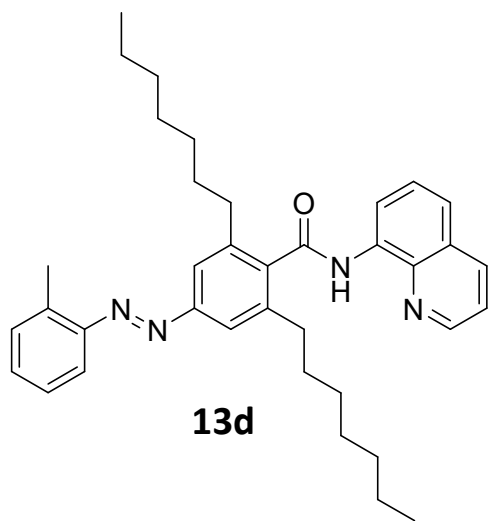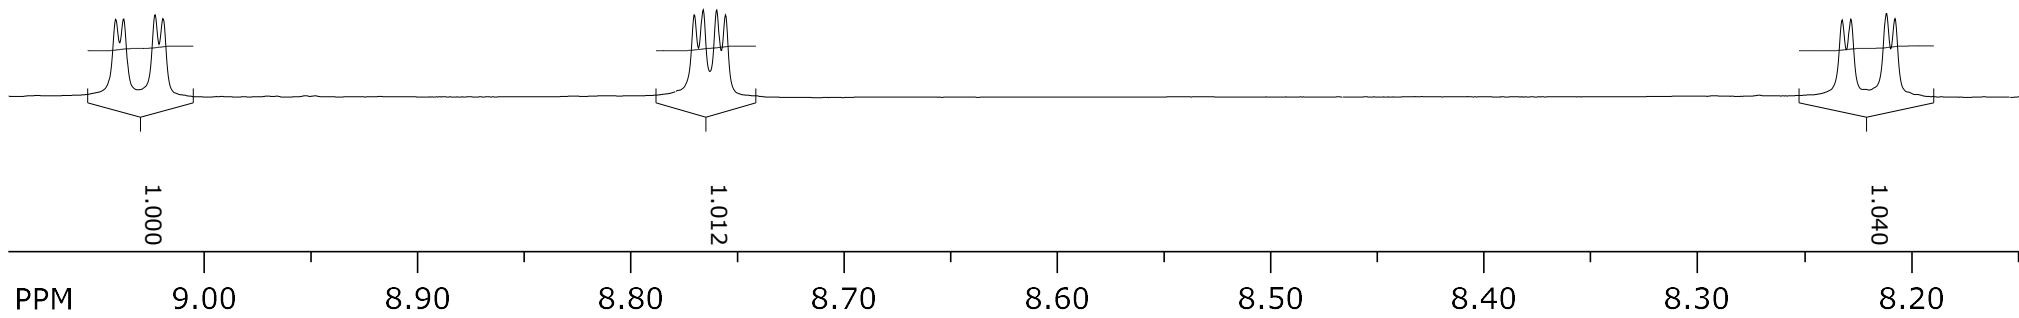

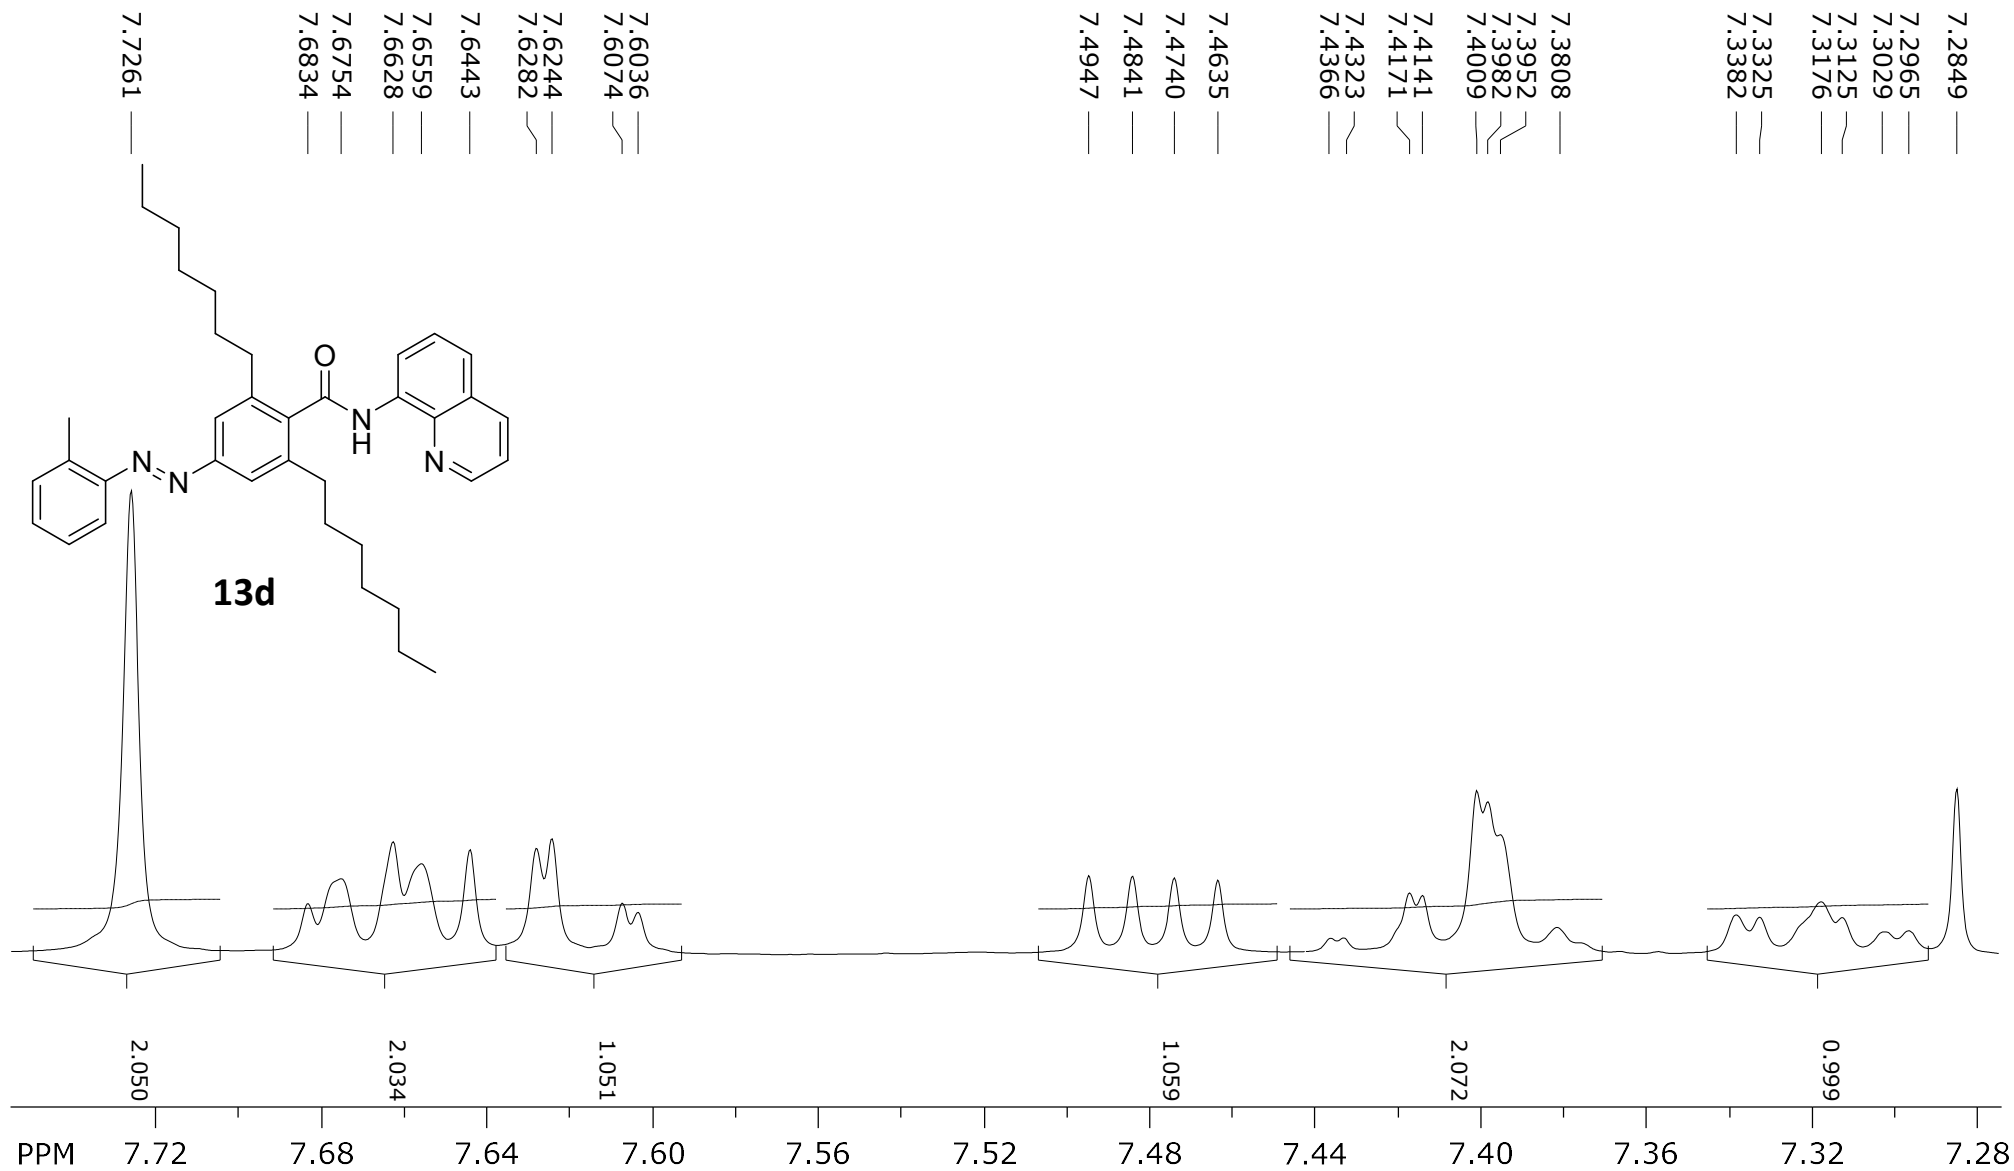

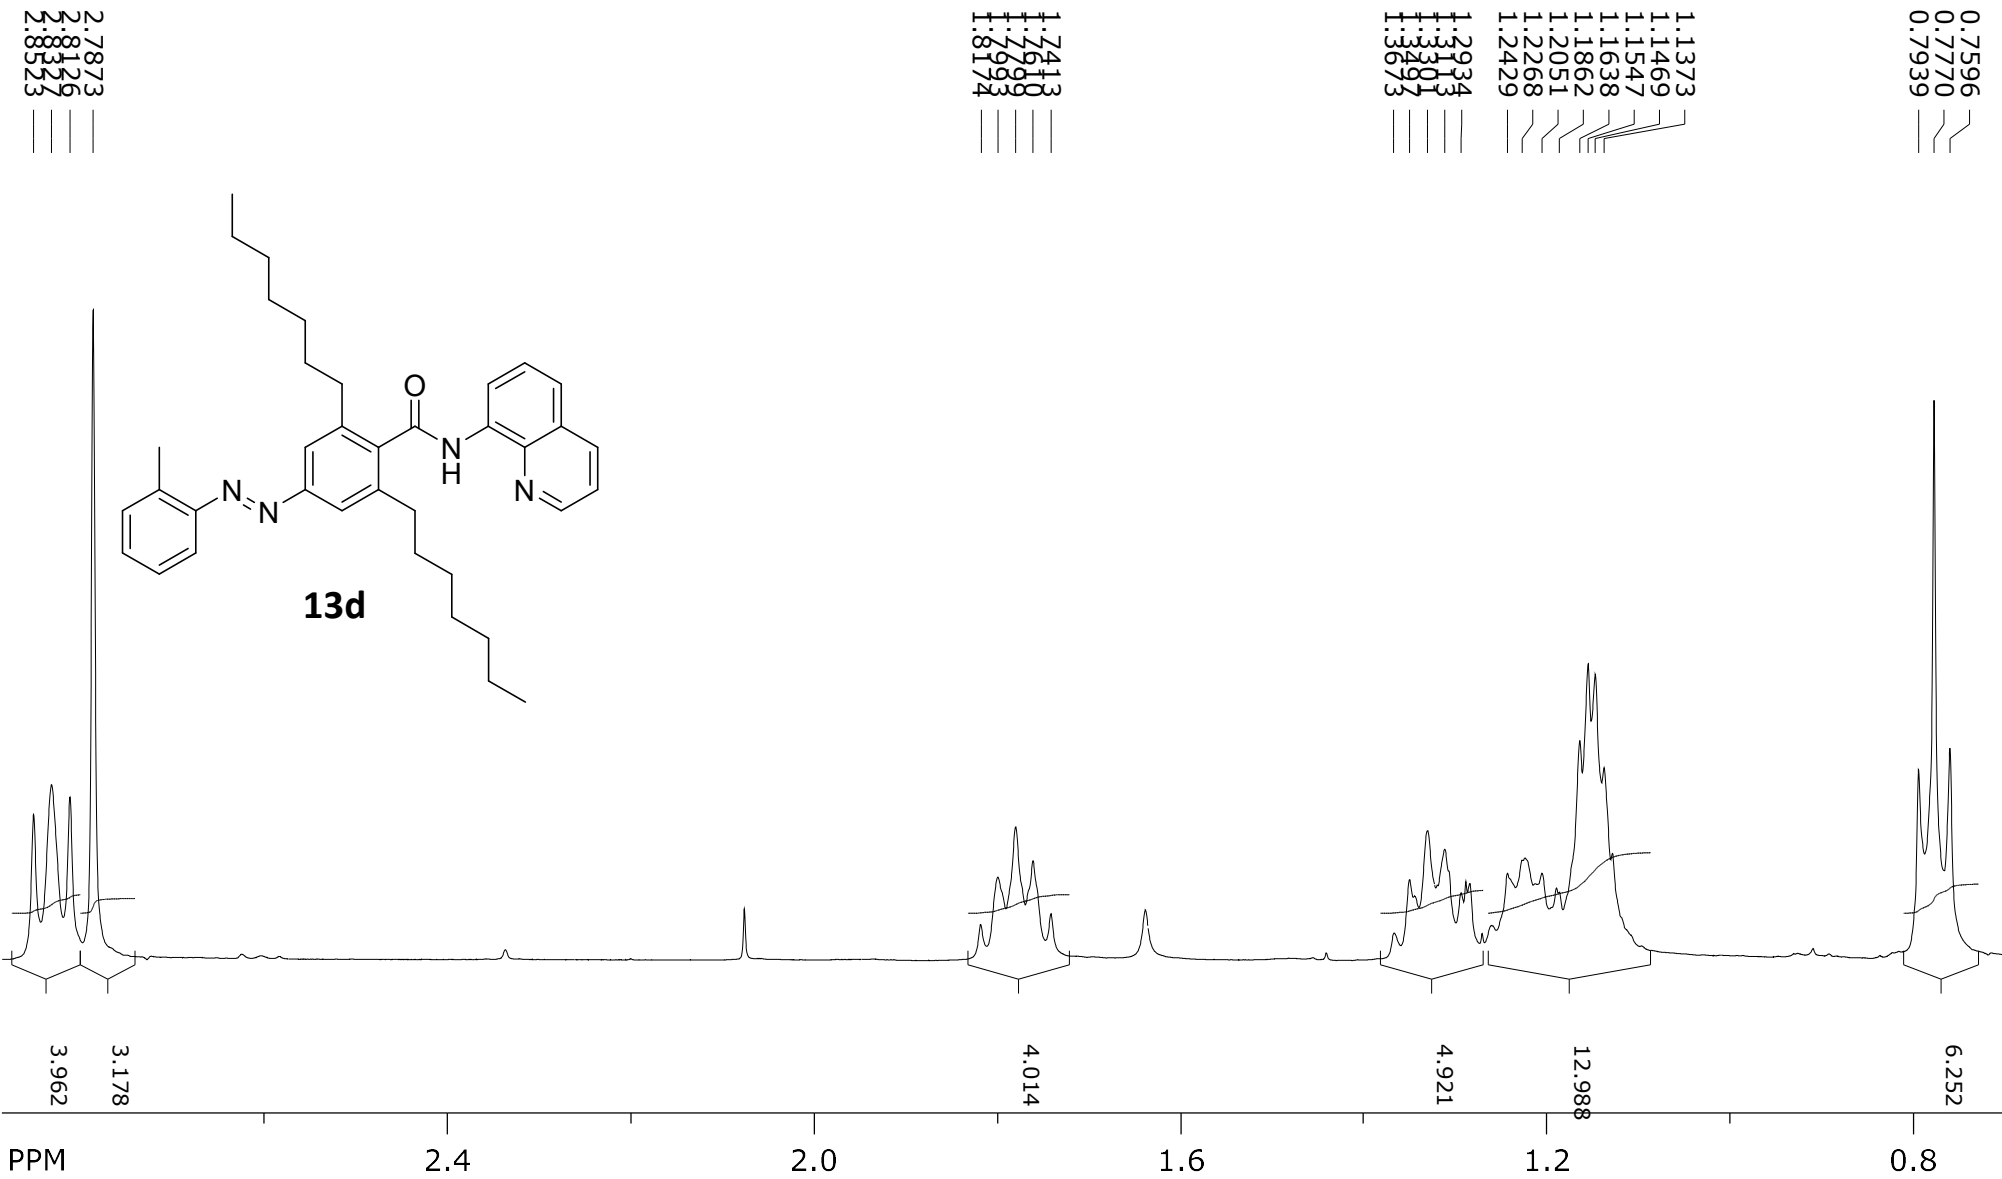

SpinWorks 4: RP 1440 CR  
C13CPD CDCl3 /opt/topspin3.5pl2/nmrdata nmrsu 51

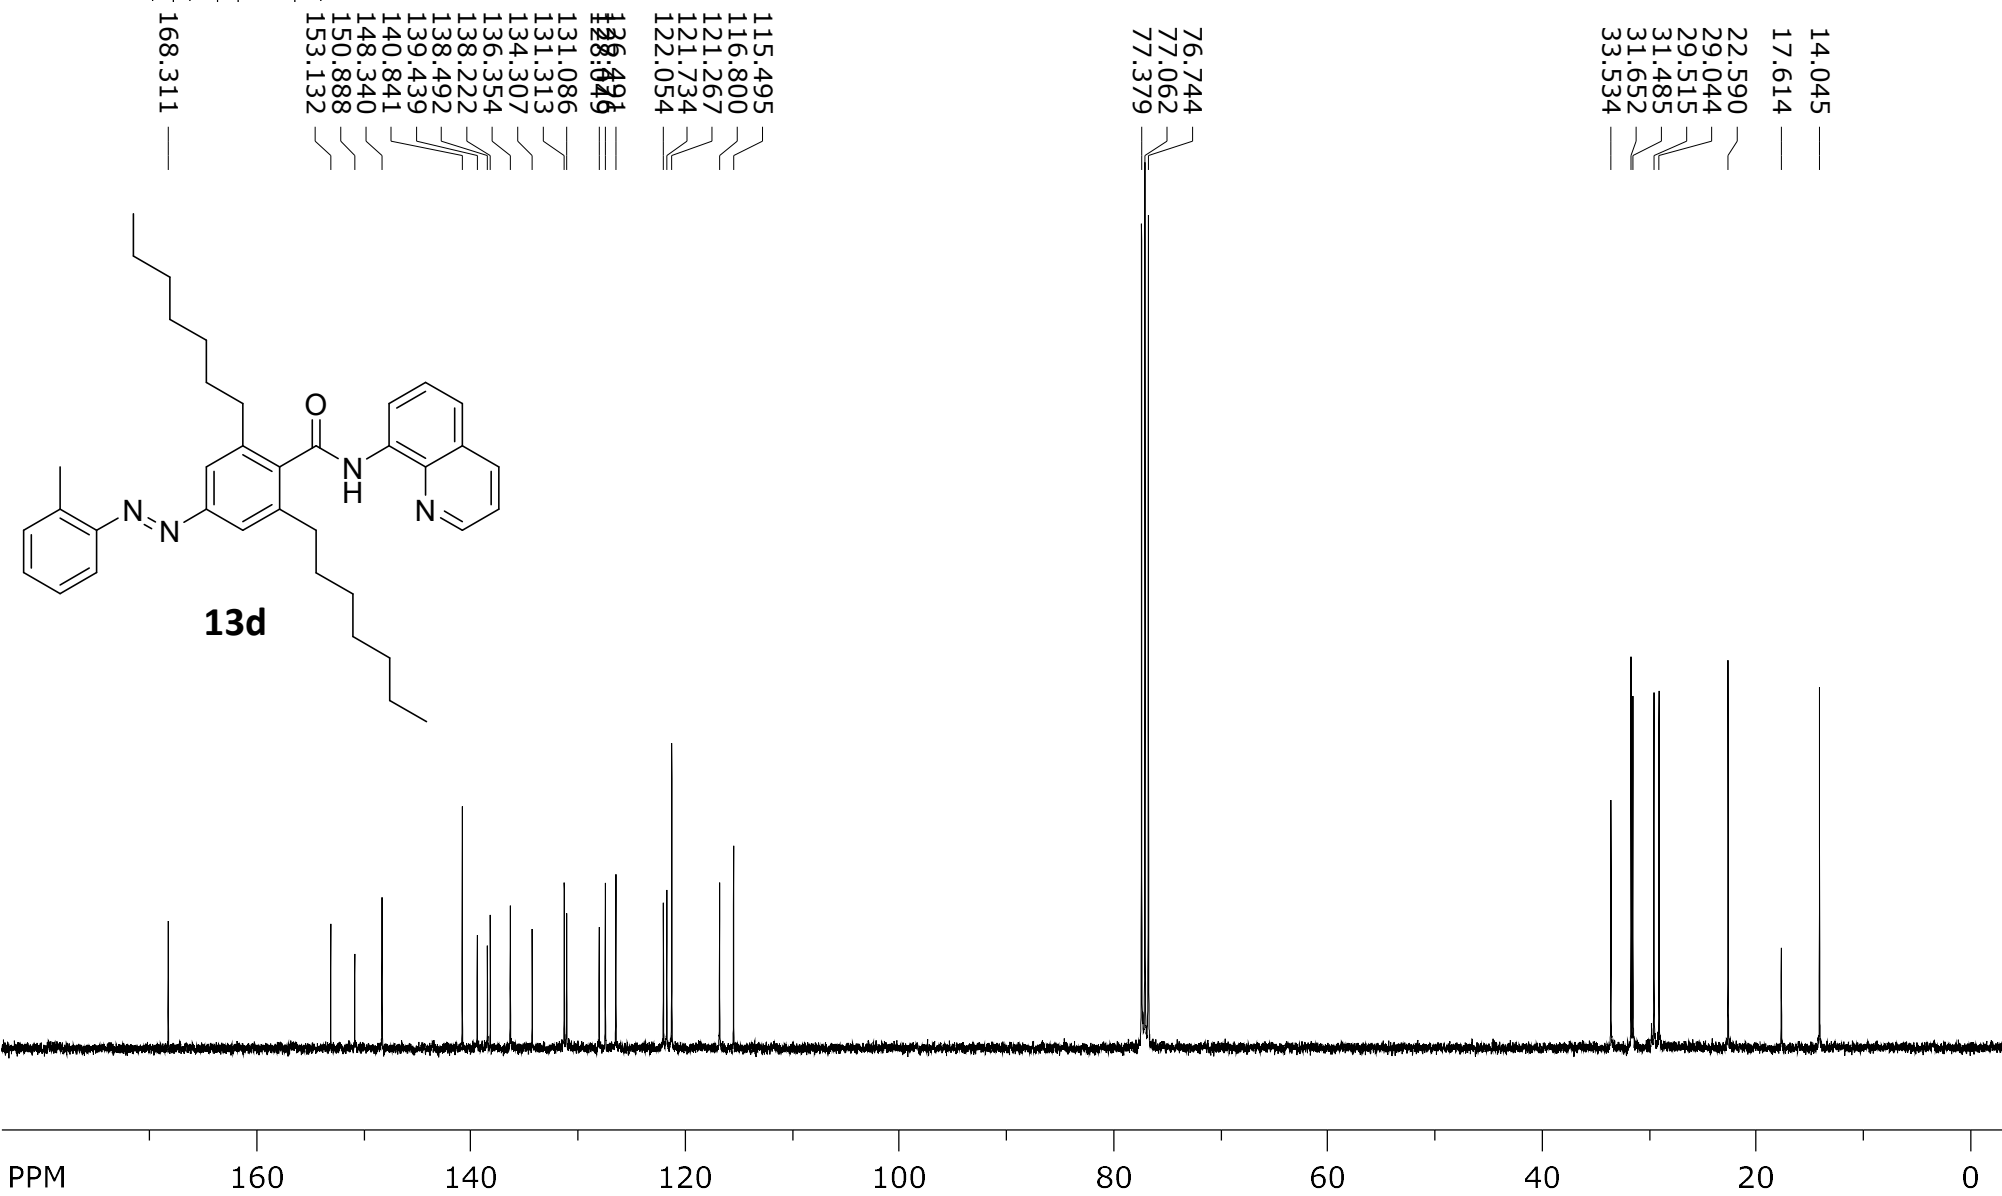

SpinWorks 4: RP 1440 CR  
C13CPD CDCl3 /opt/topspin3.5pl2/nmrdata nmrsu 51

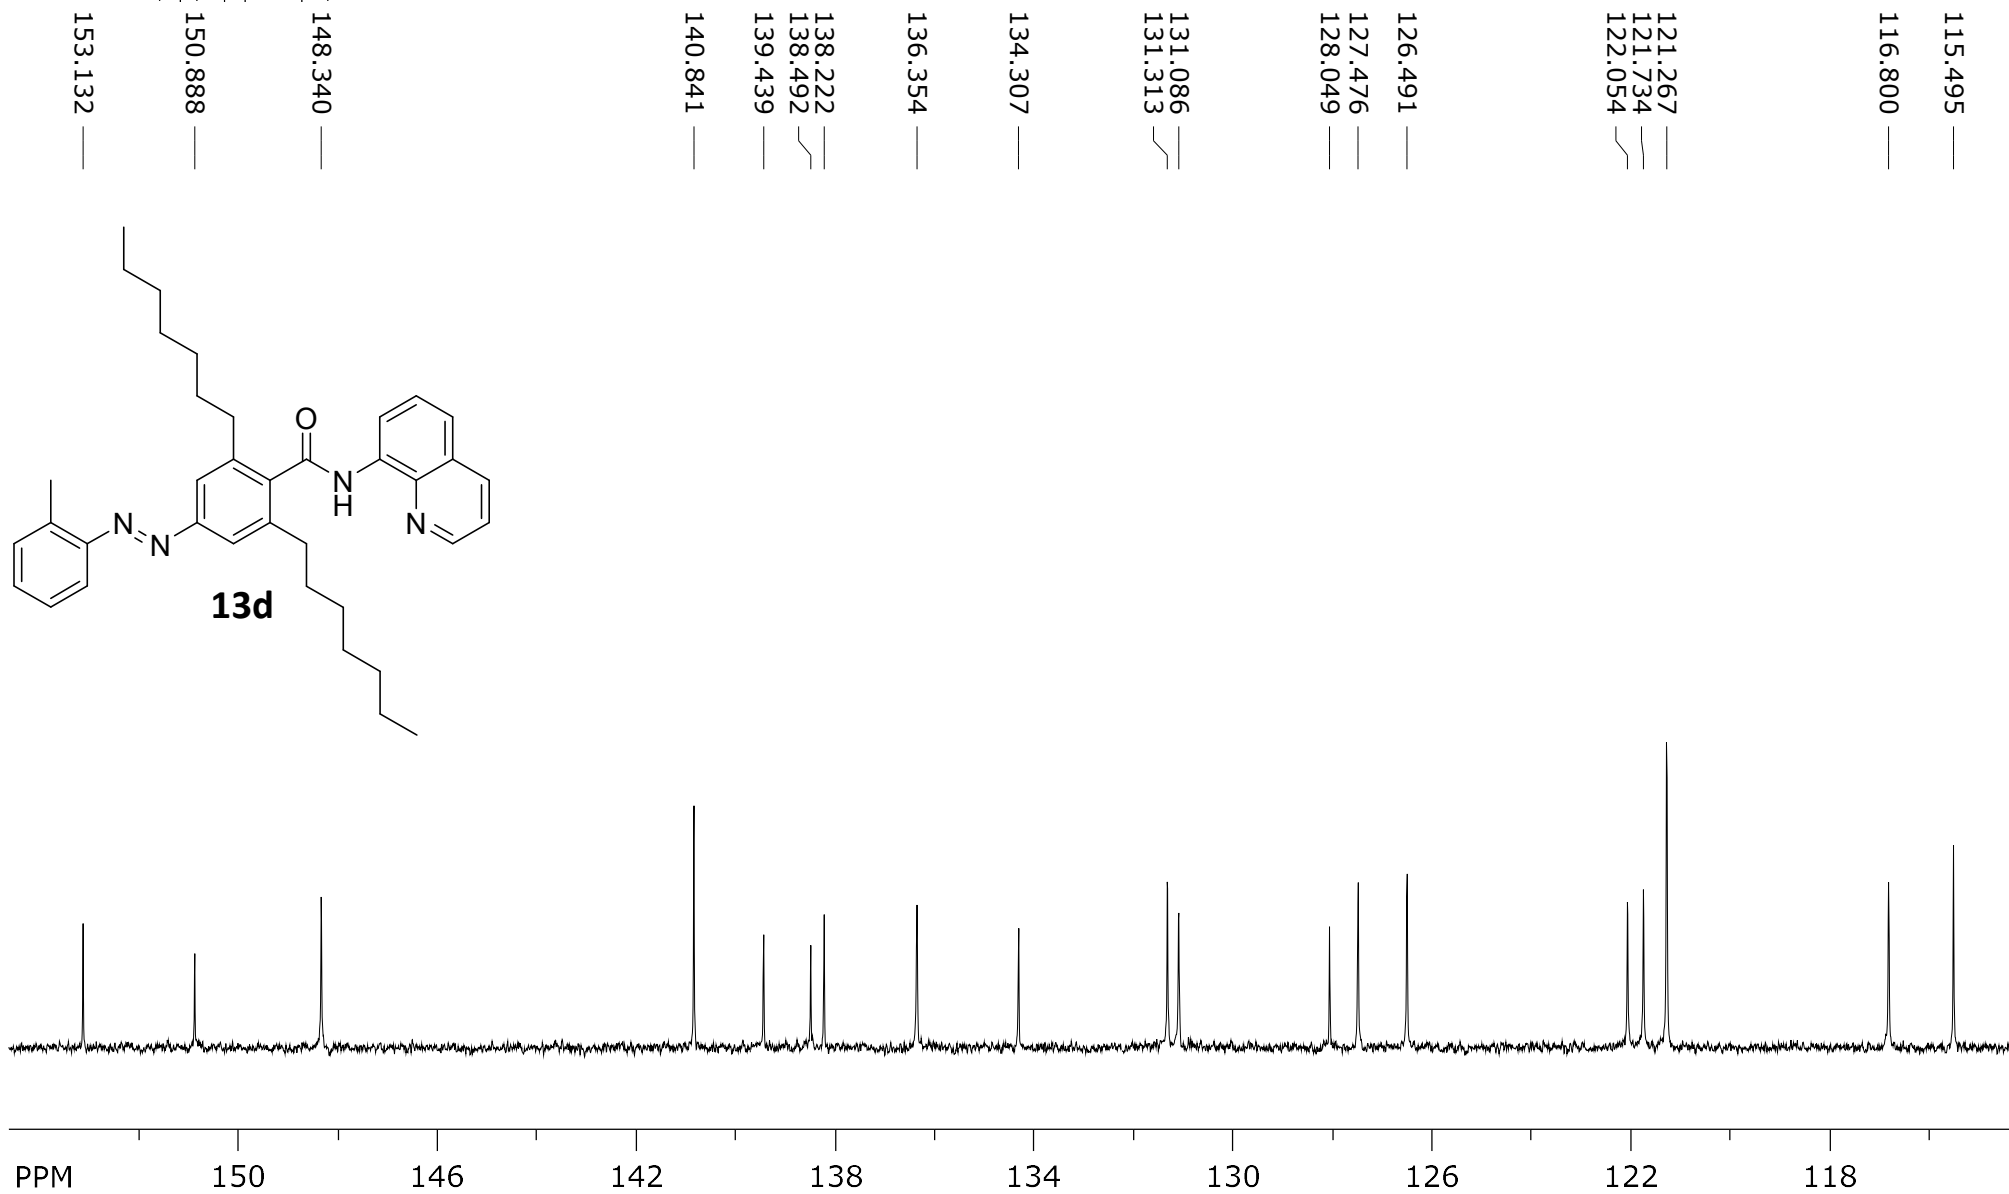



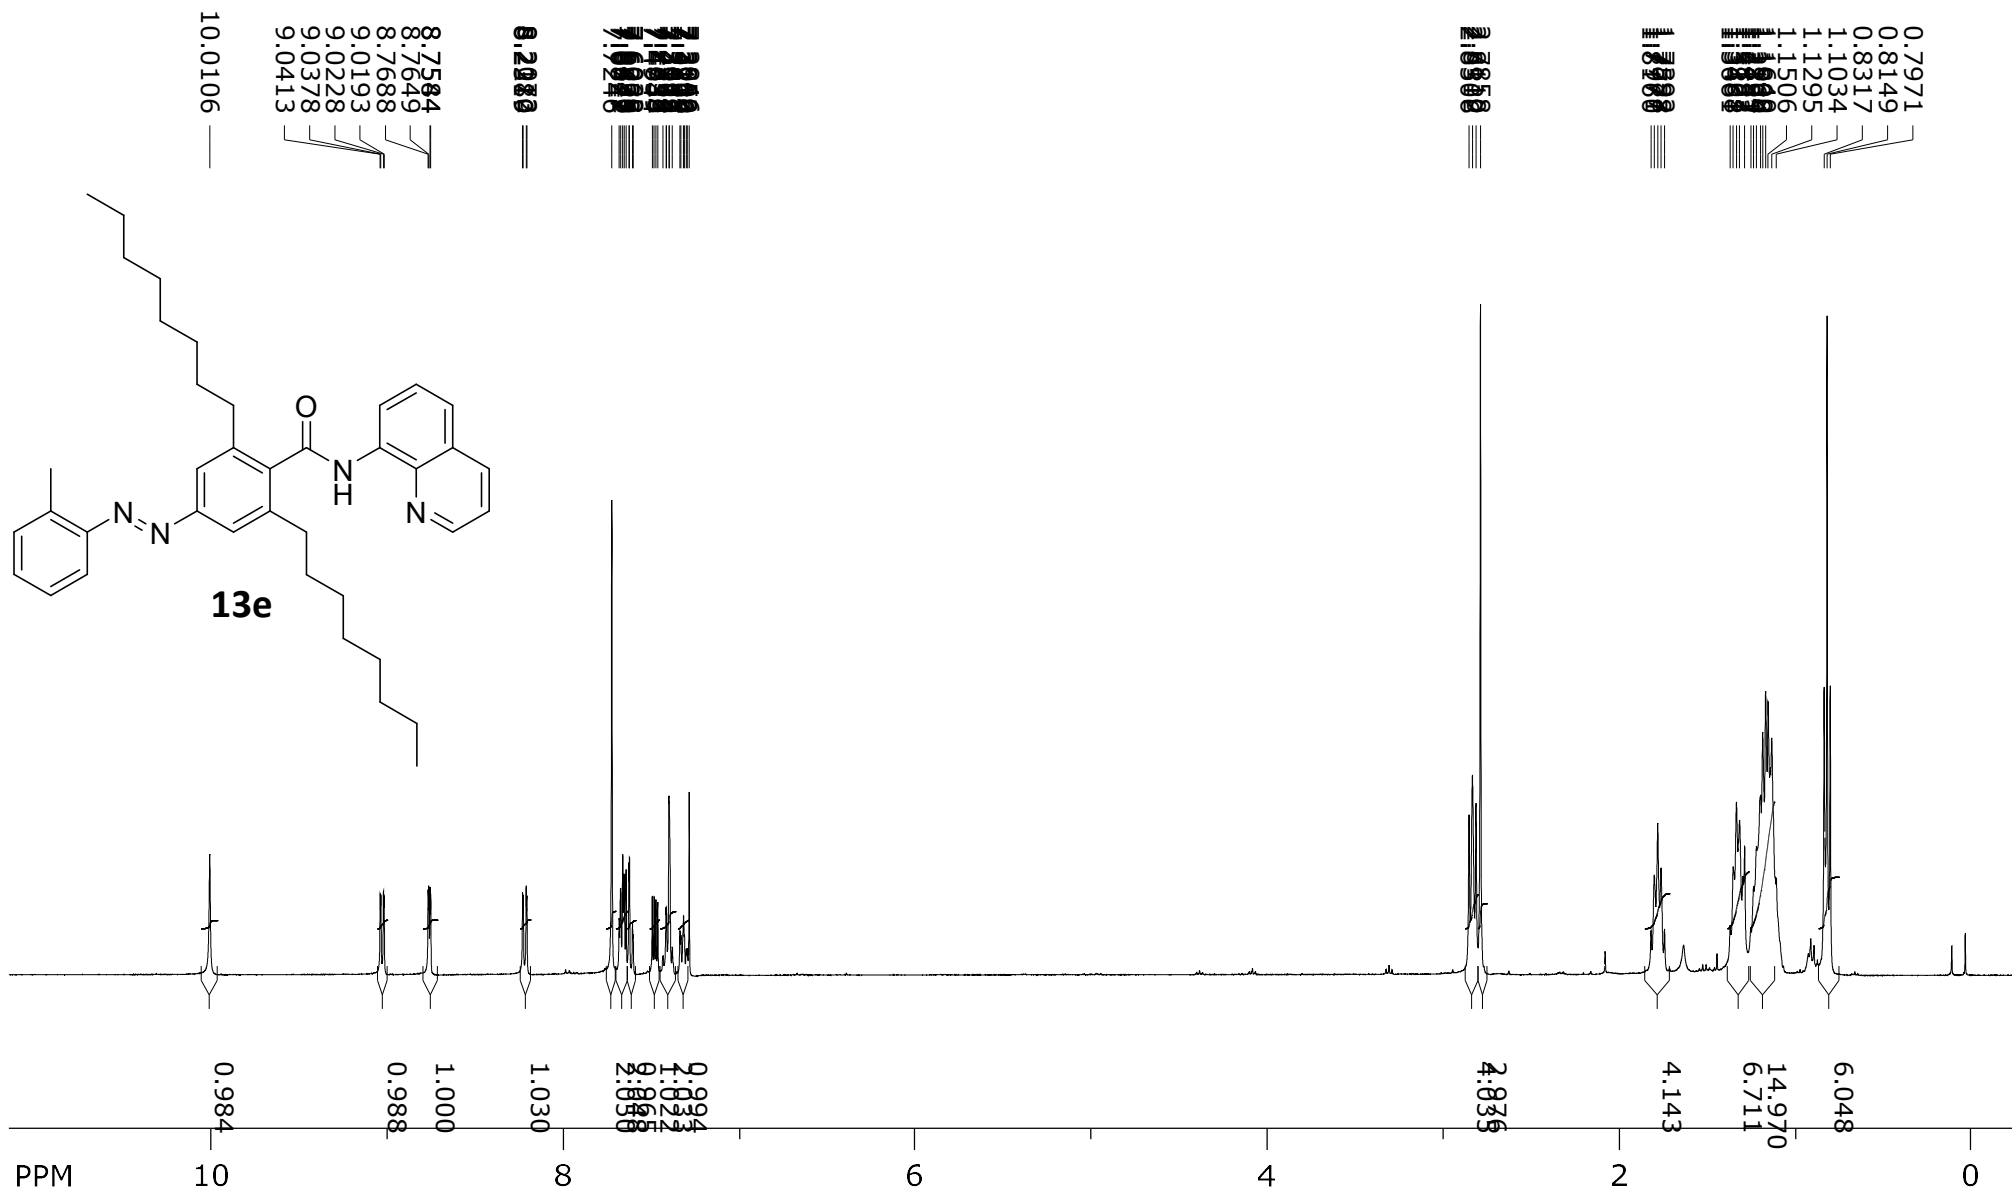

SpinWorks 4: rp-1416a2

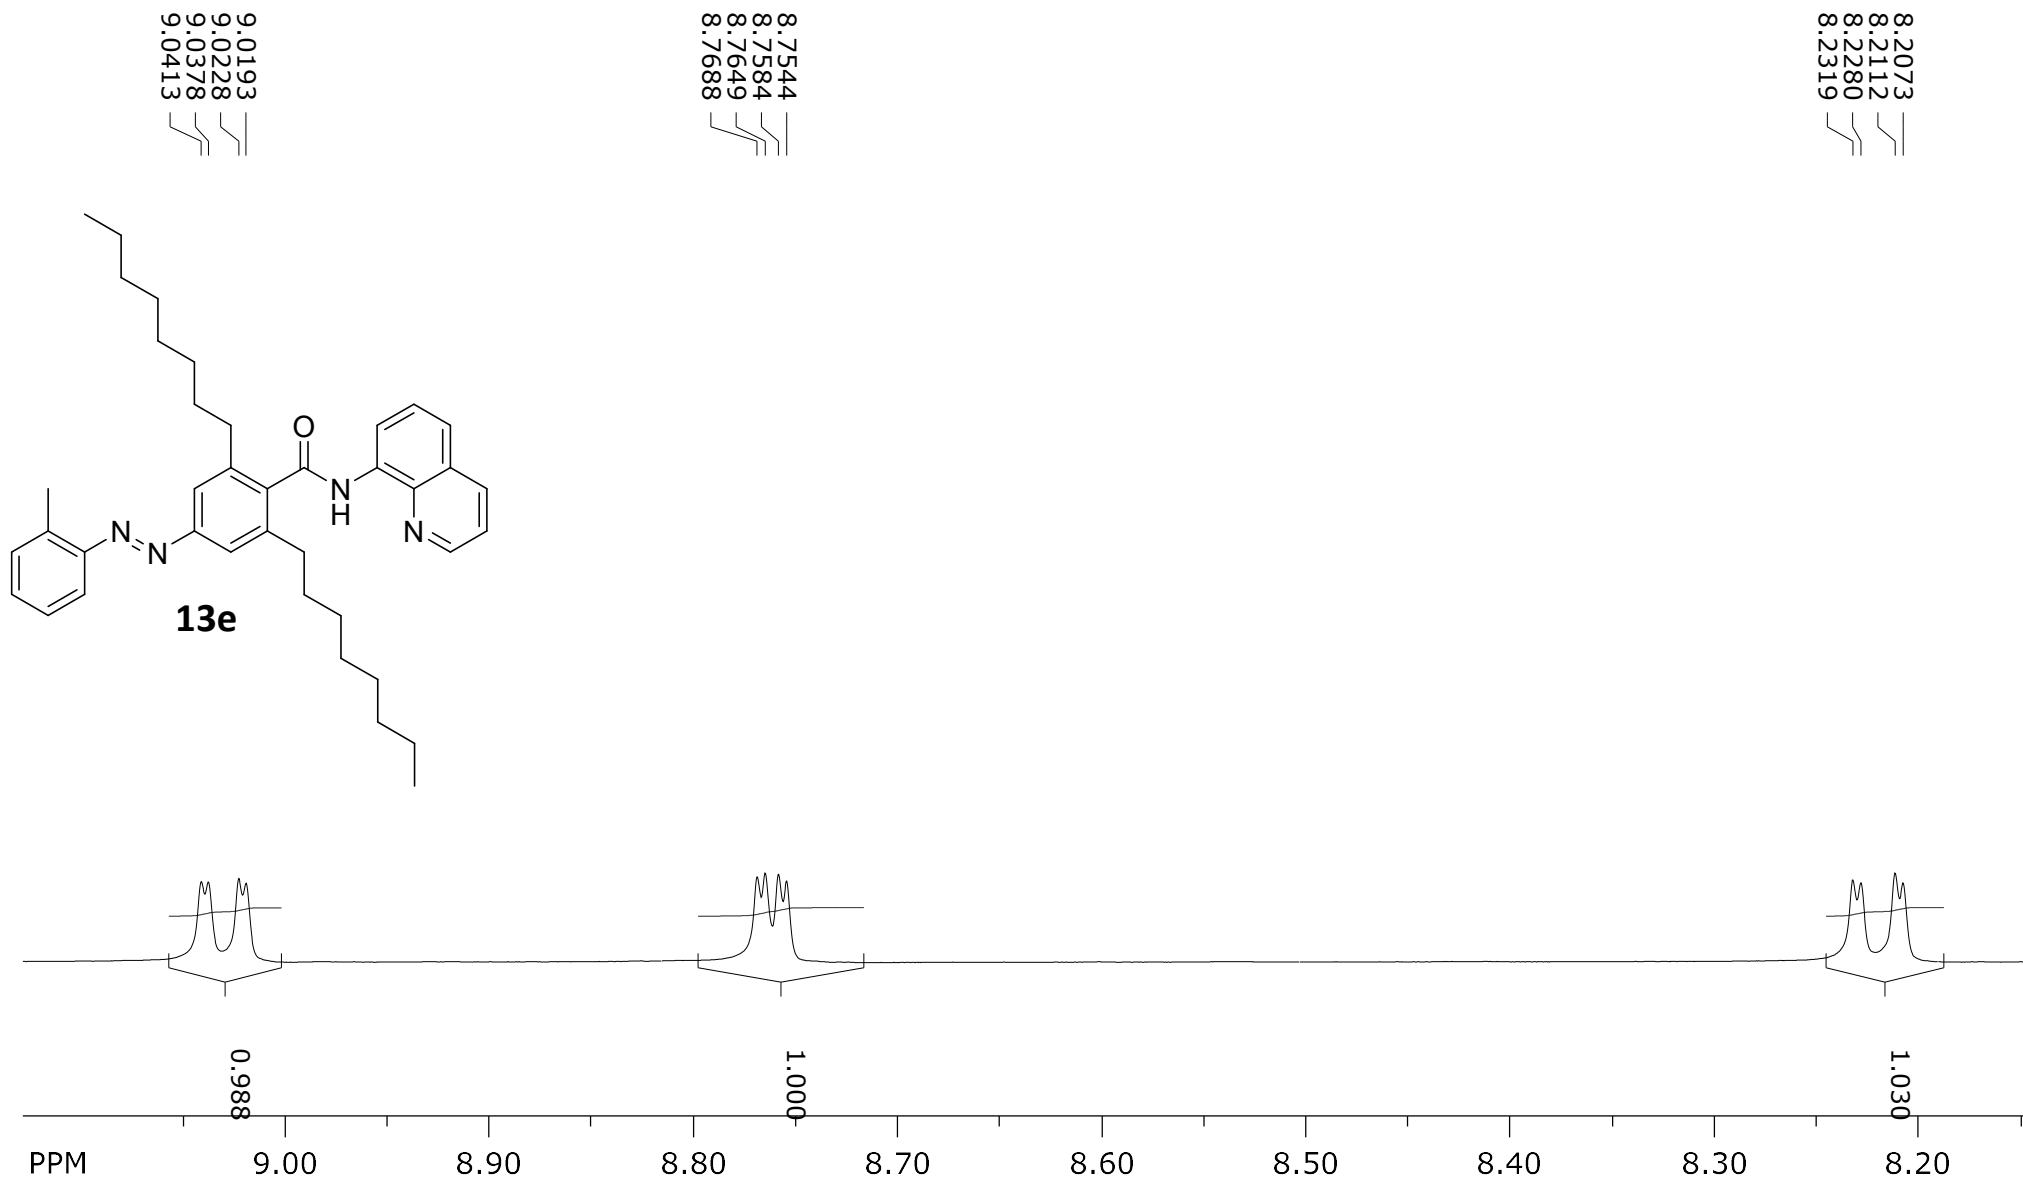

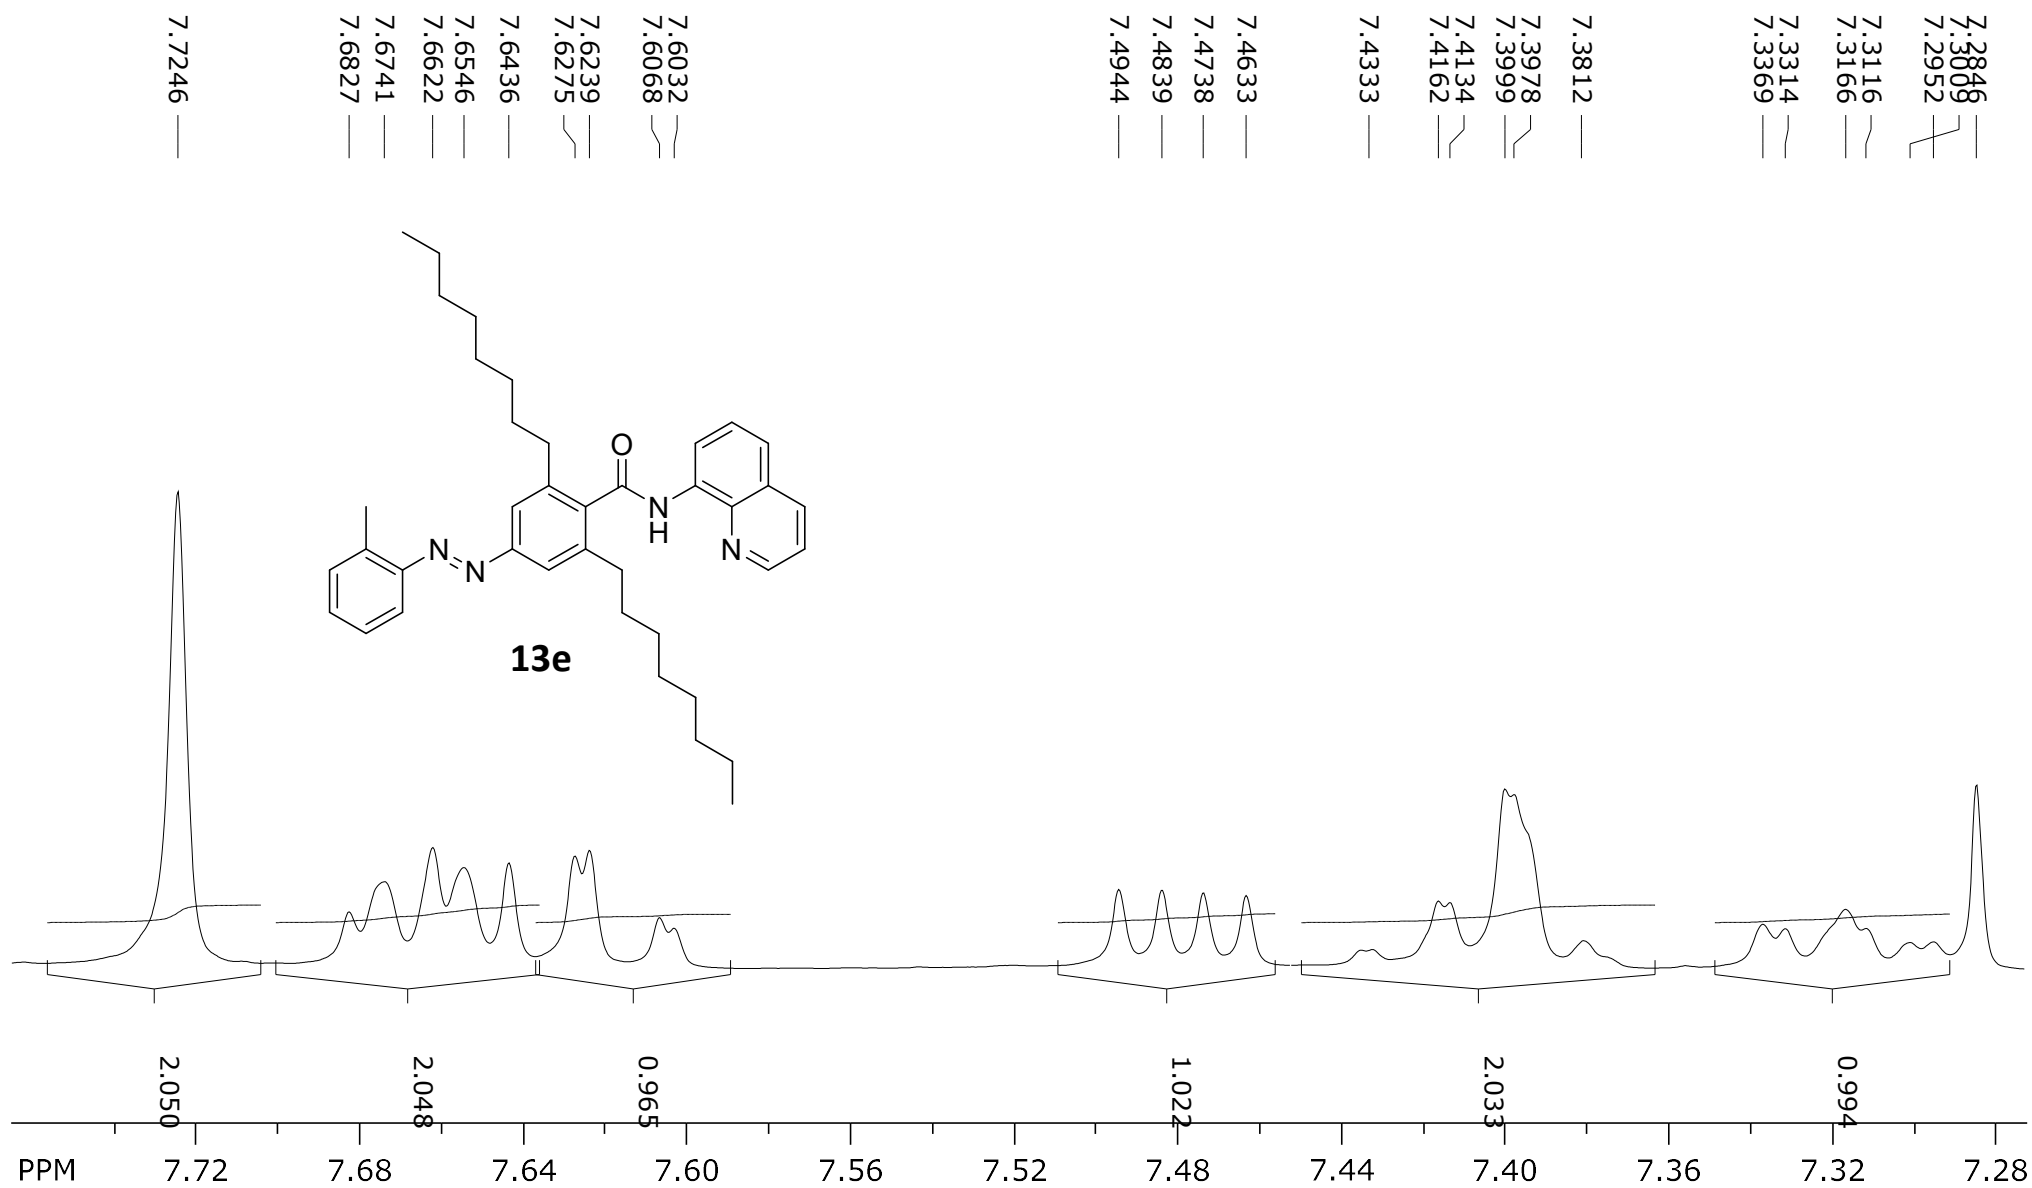

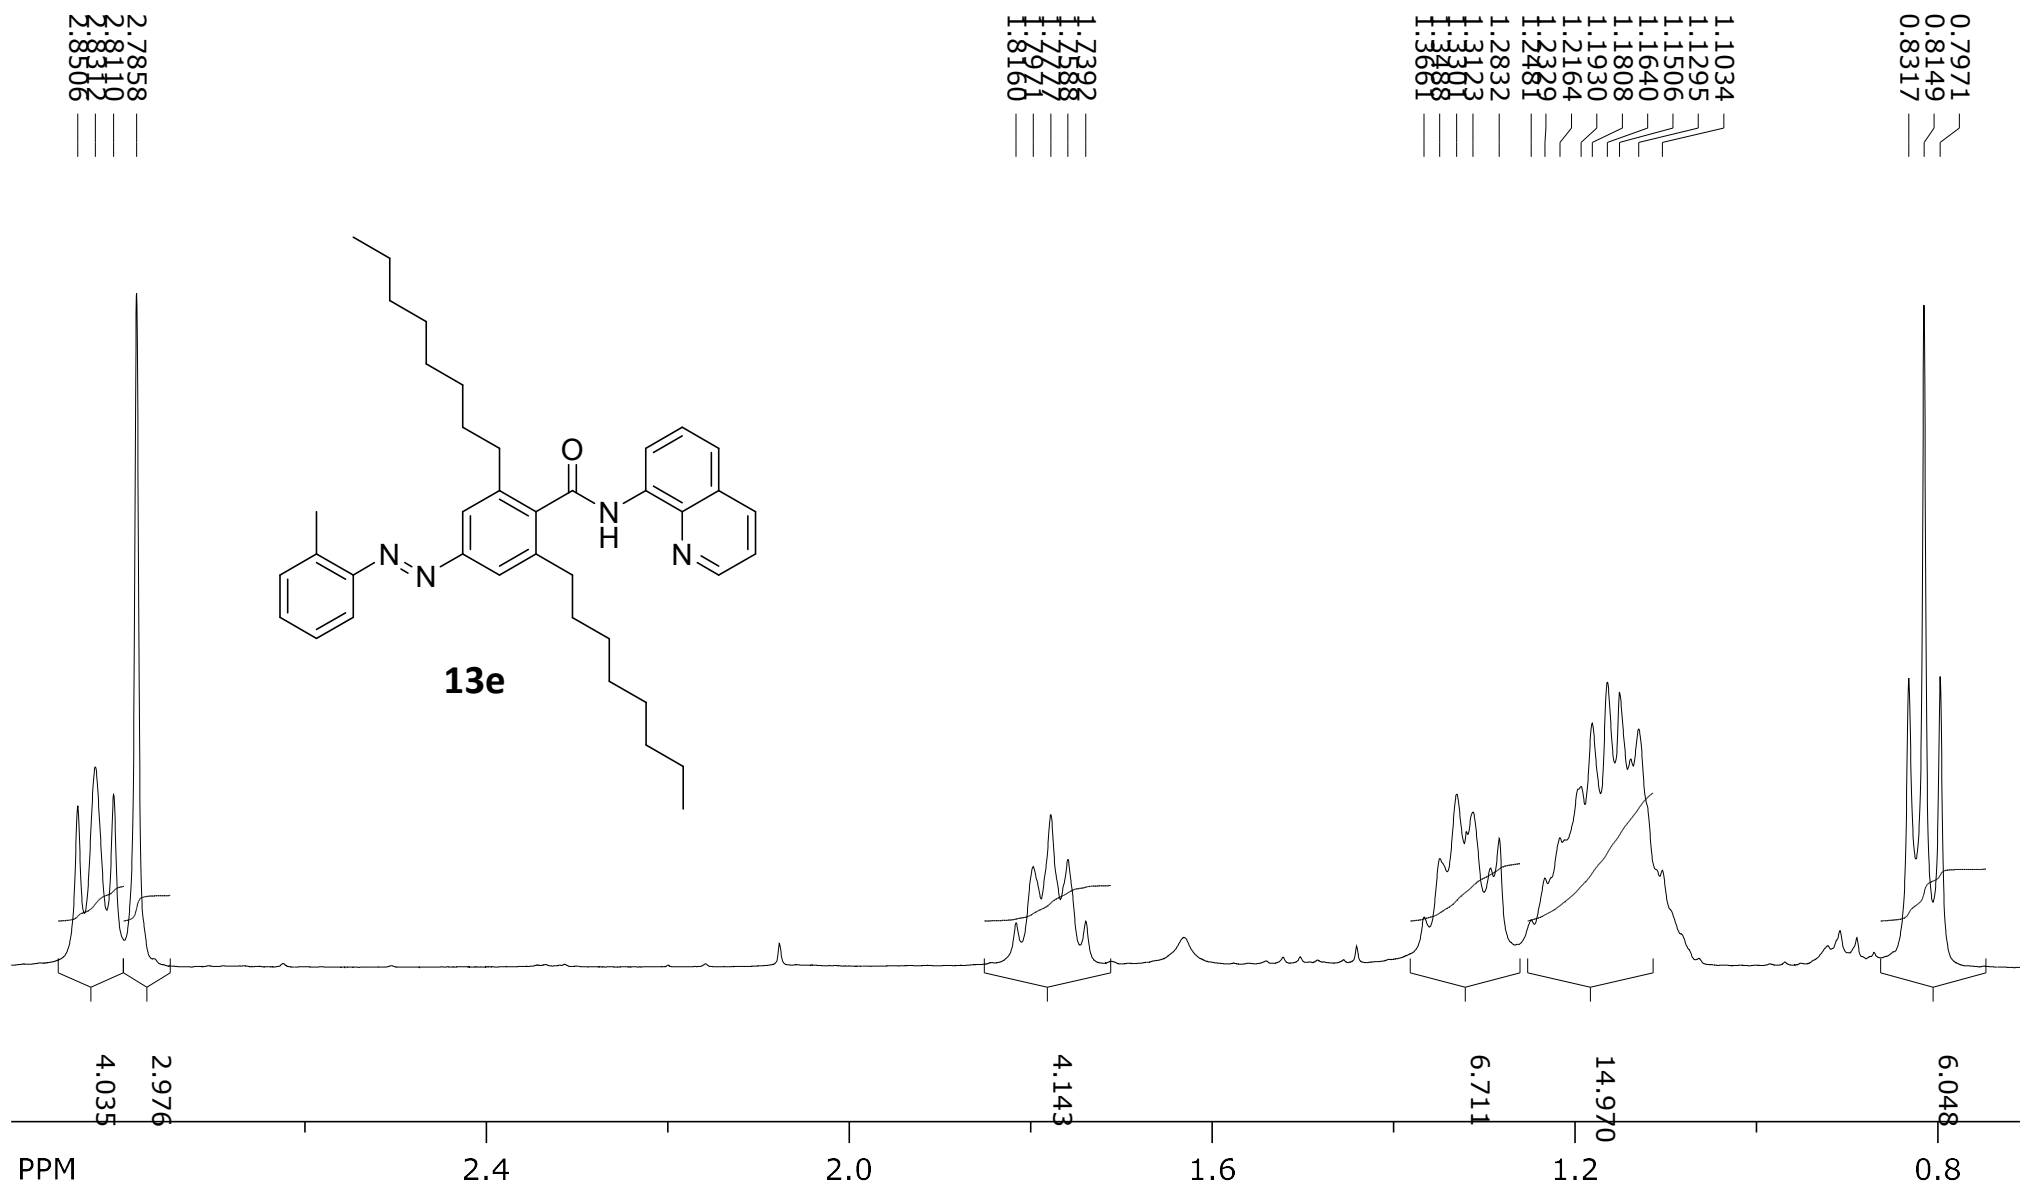

SpinWorks 4: RP 1416 A2  
C13CPD256 CDCl3 /opt/topspin3.5pl2/nmrdata nmrsu 1

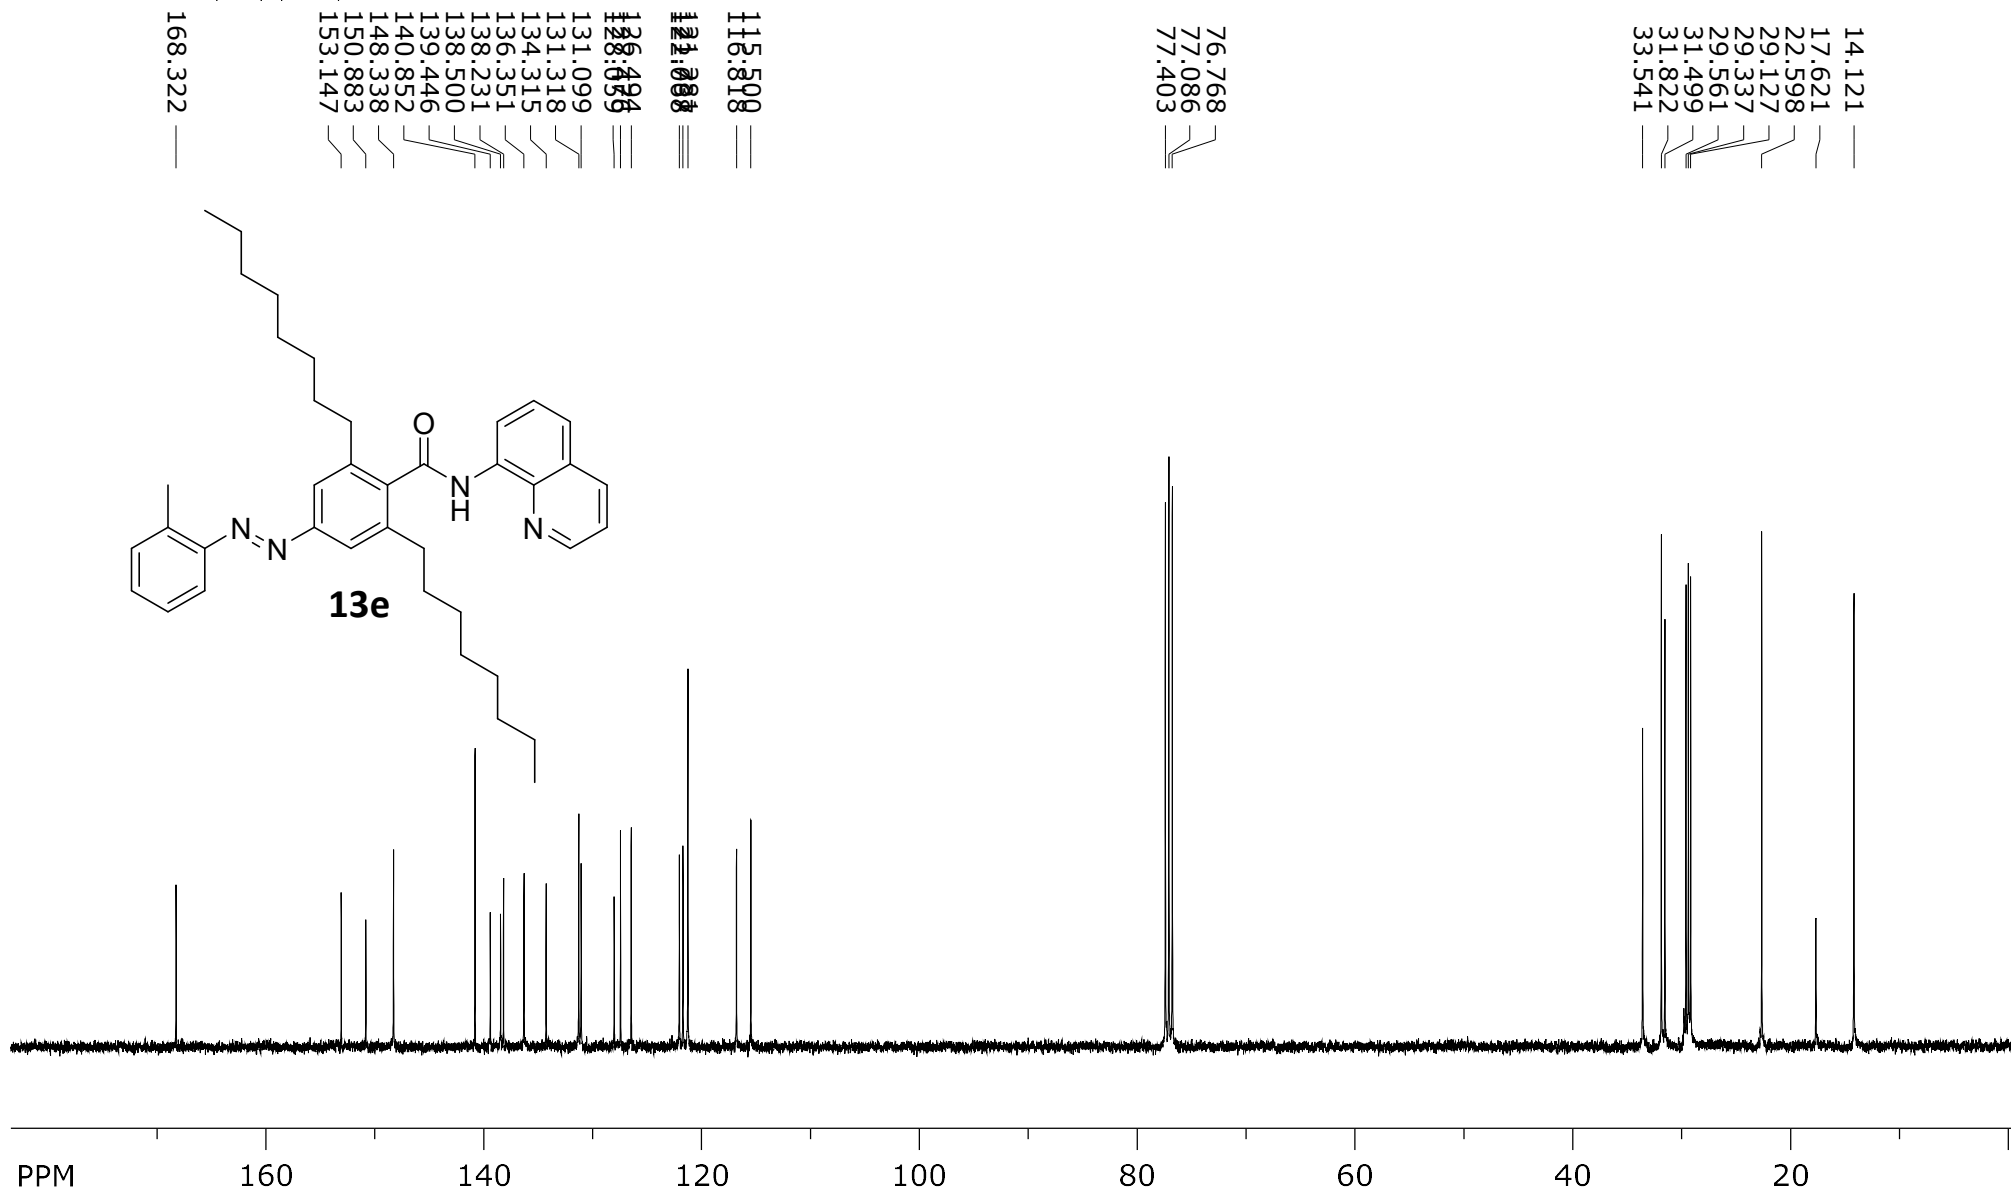

SpinWorks 4: RP 1416 A2  
C13CPD256 CDCl3 /opt/topspin3.5pl2/nmrdata nmrsu 1

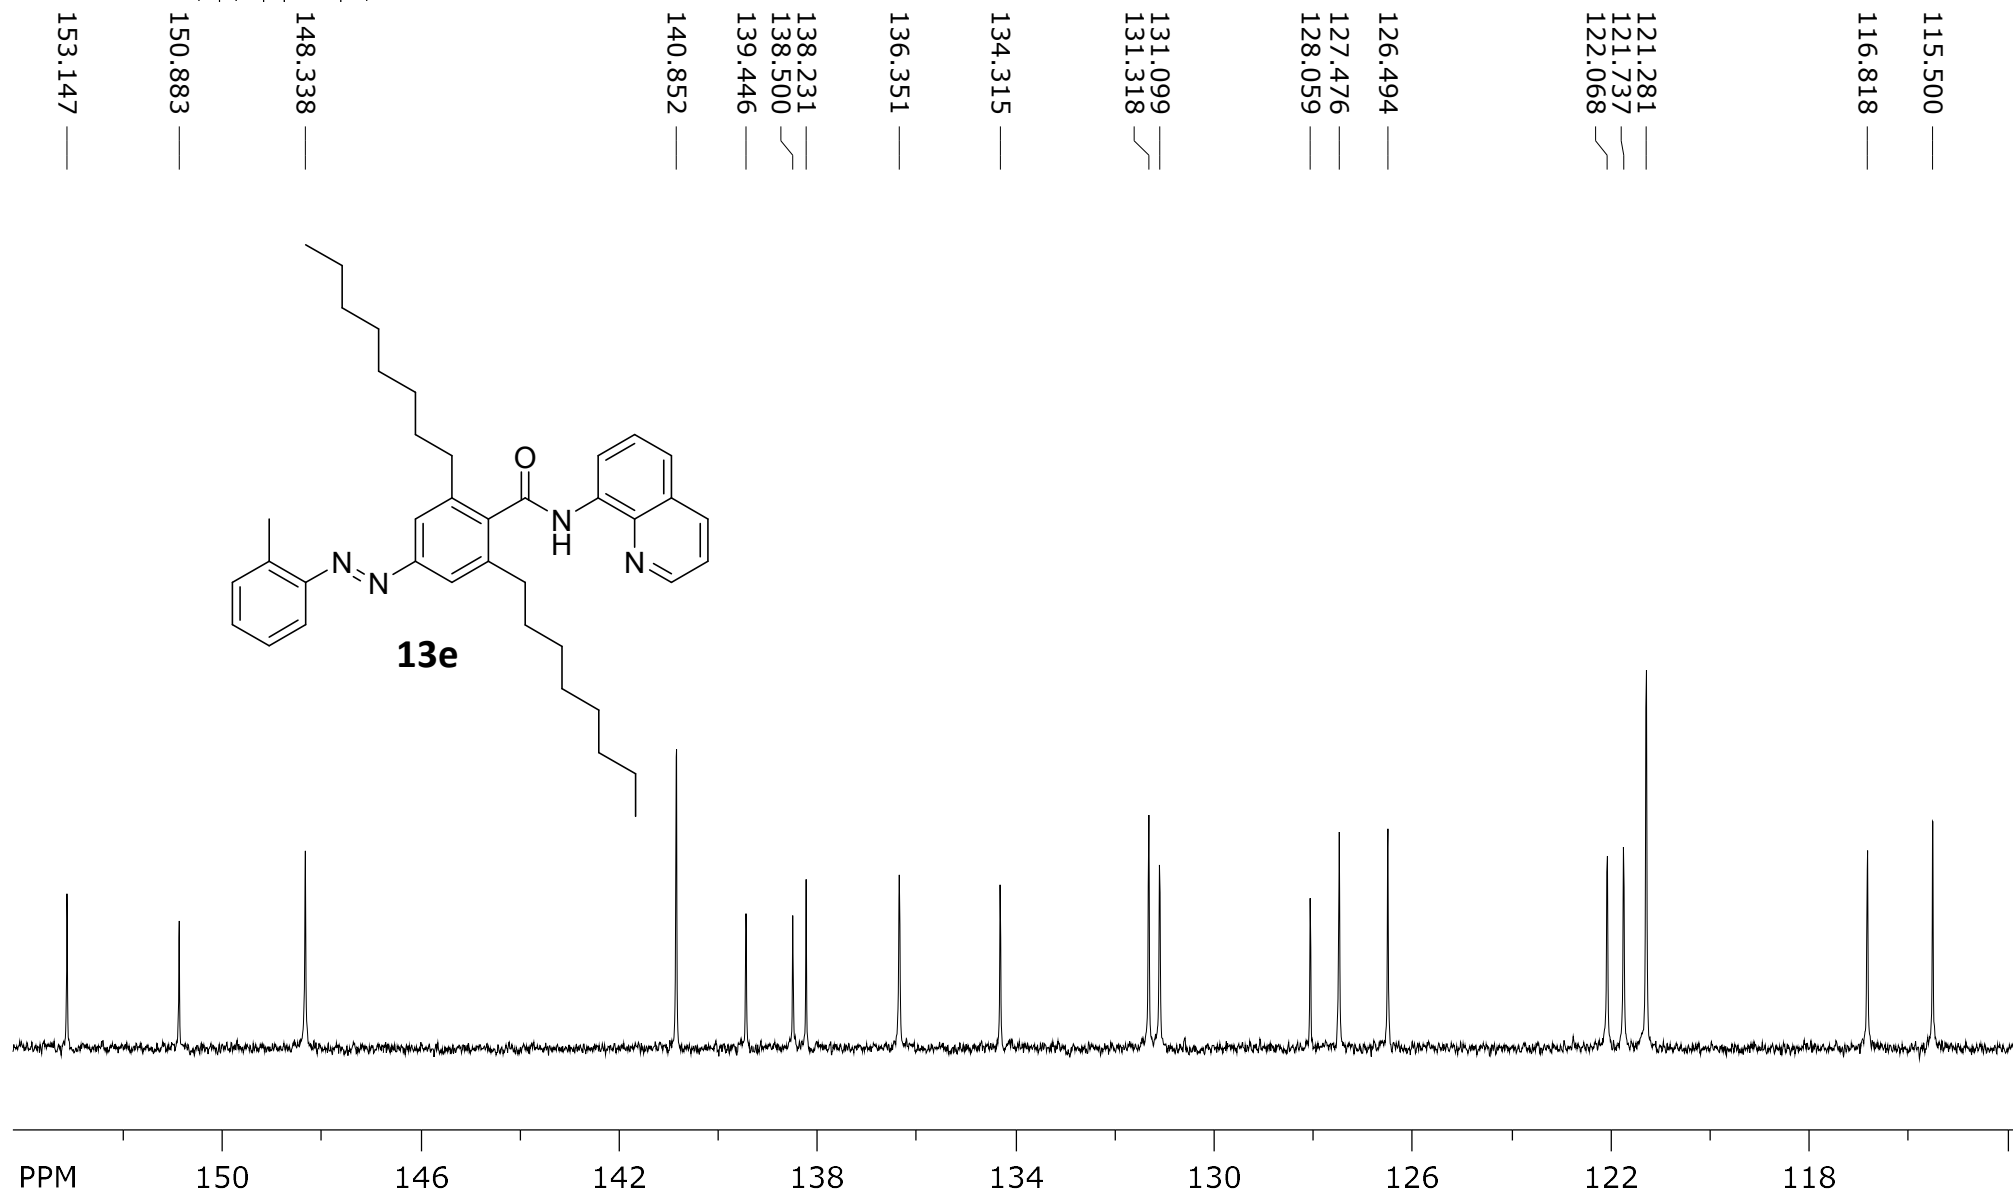



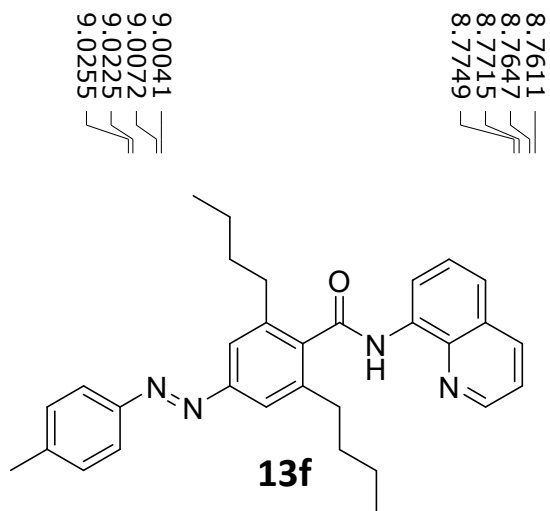

9.0041  
9.0072  
9.0225  
9.0255

8.7611  
8.7647  
8.7715  
8.7749

8.2070  
8.2105  
8.2277  
8.2312

7.8782  
7.8988

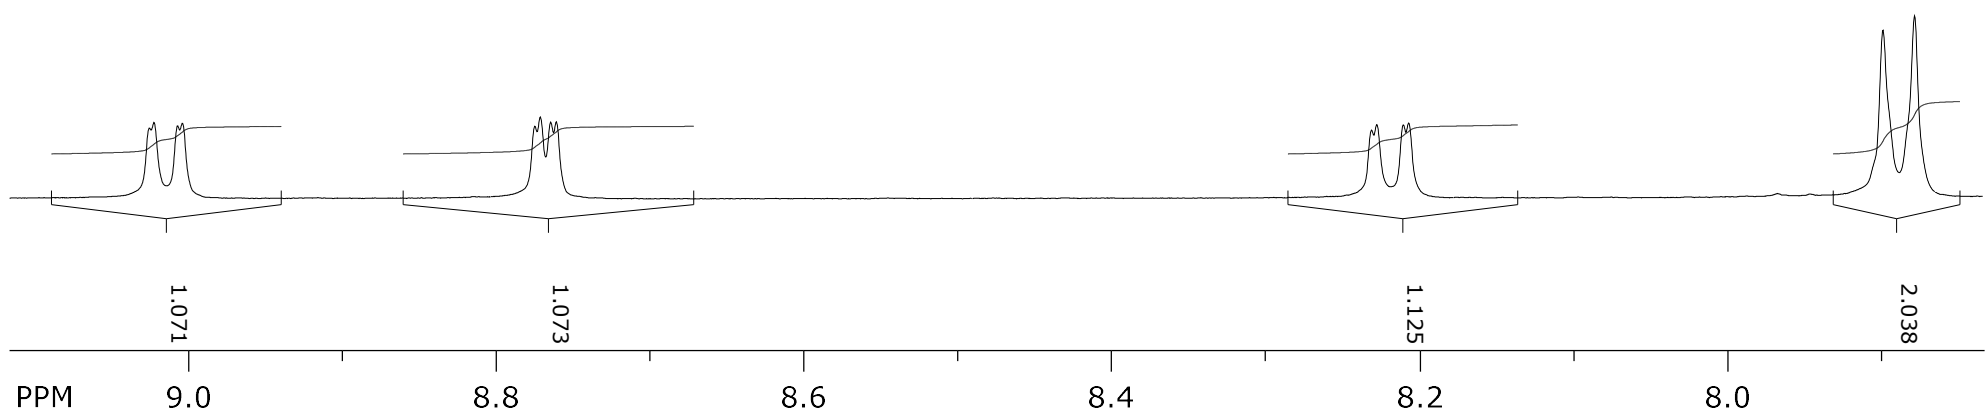



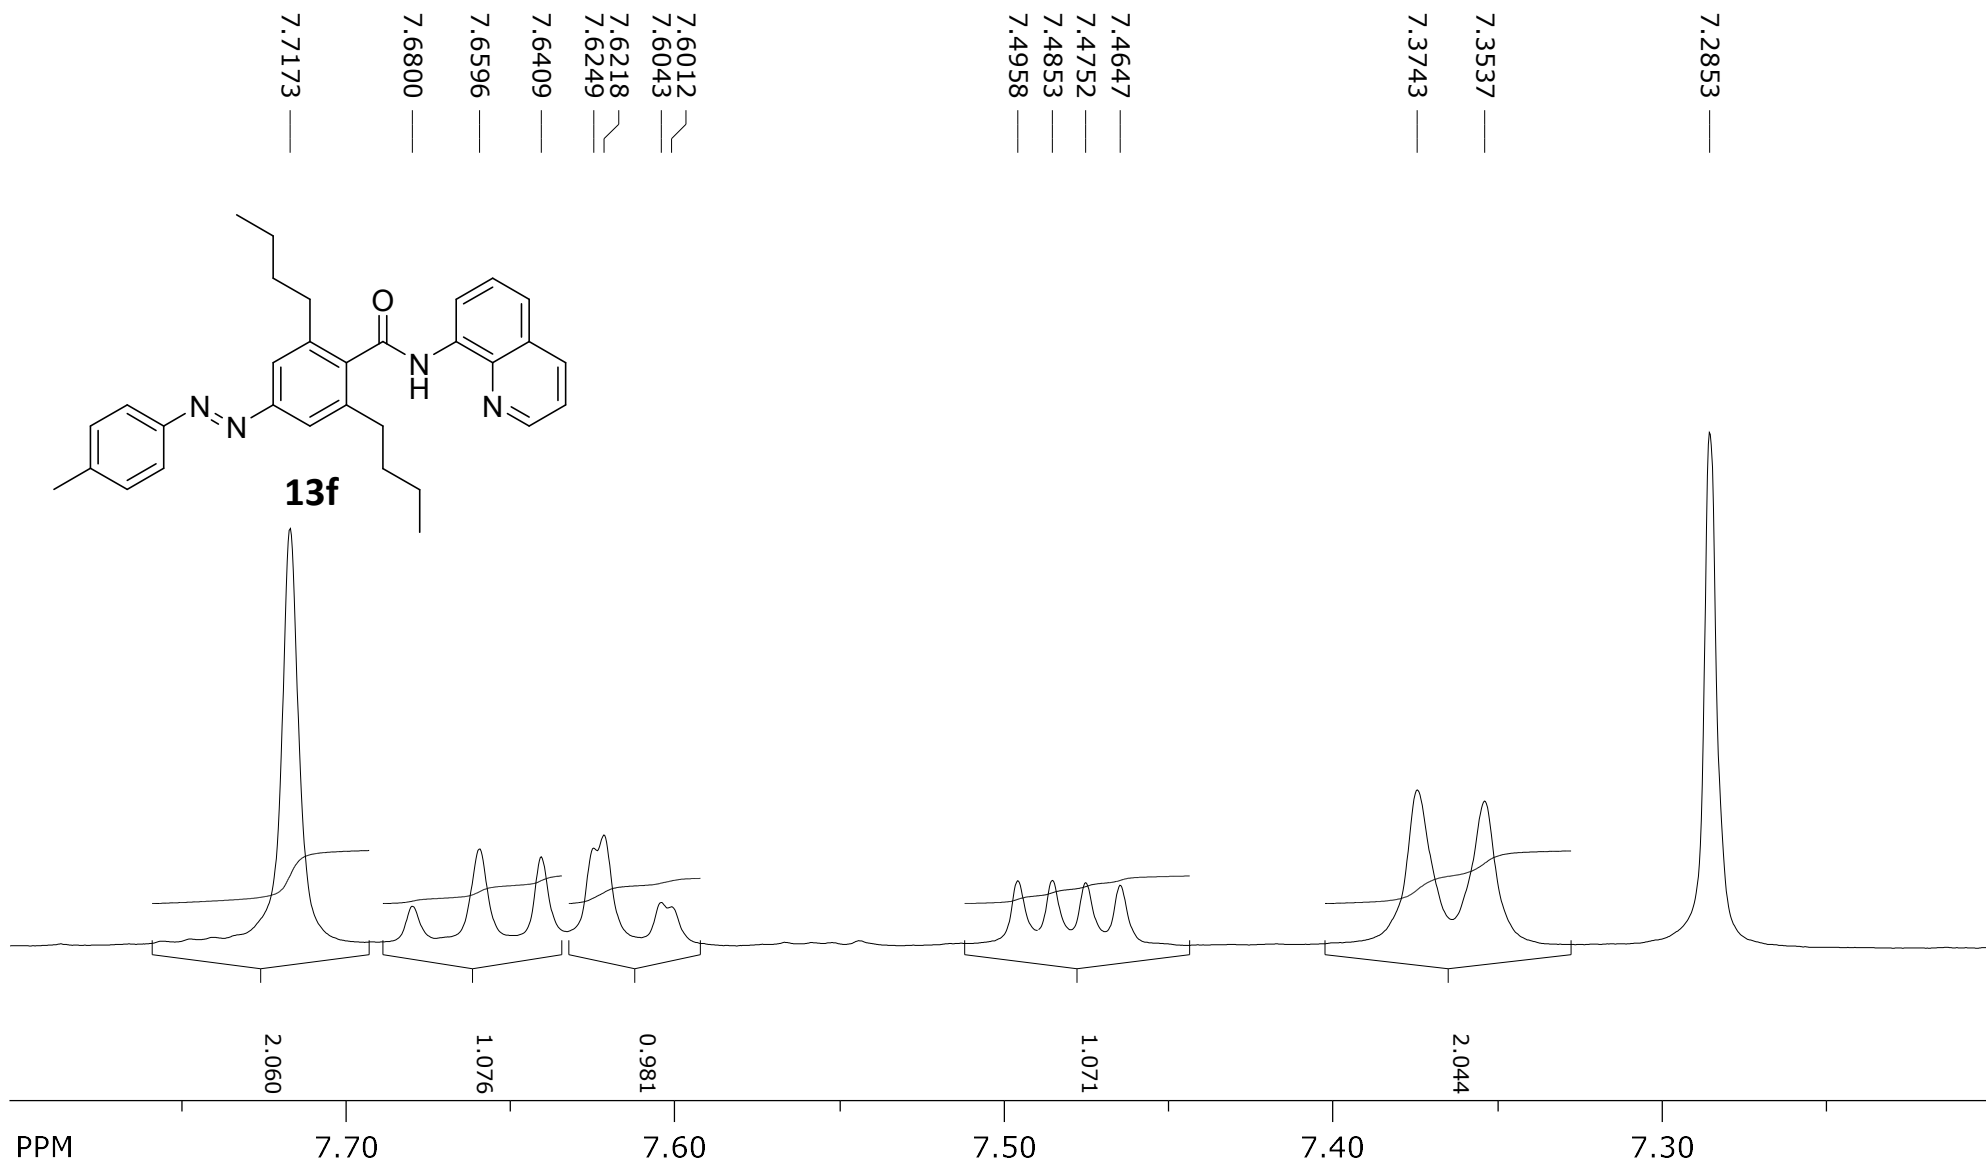

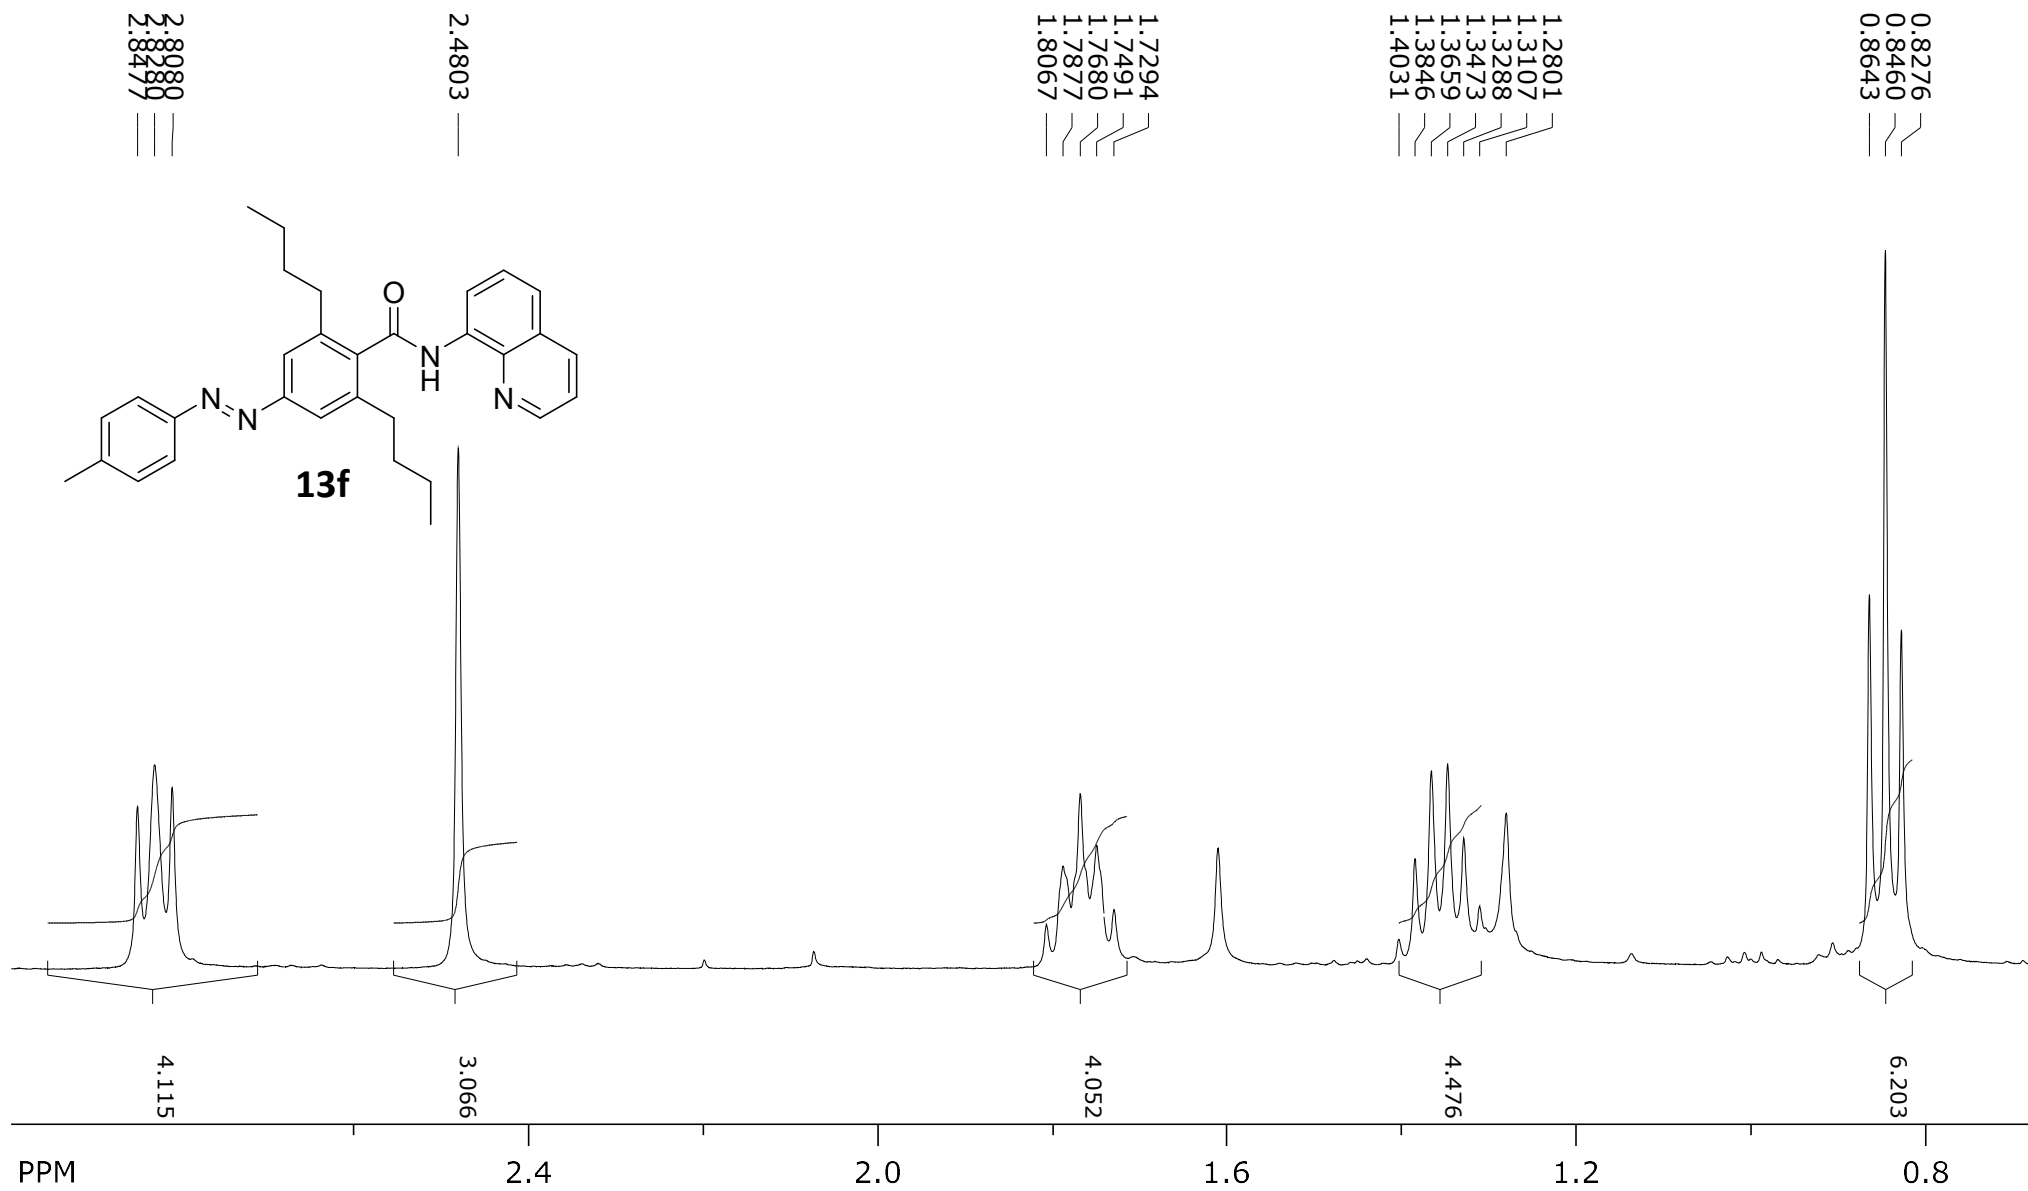

SpinWorks 4: RP 1402 A2  
C13CPD CDCl3 /opt/topspin3.5pl2/nmrdata nmrsu 1

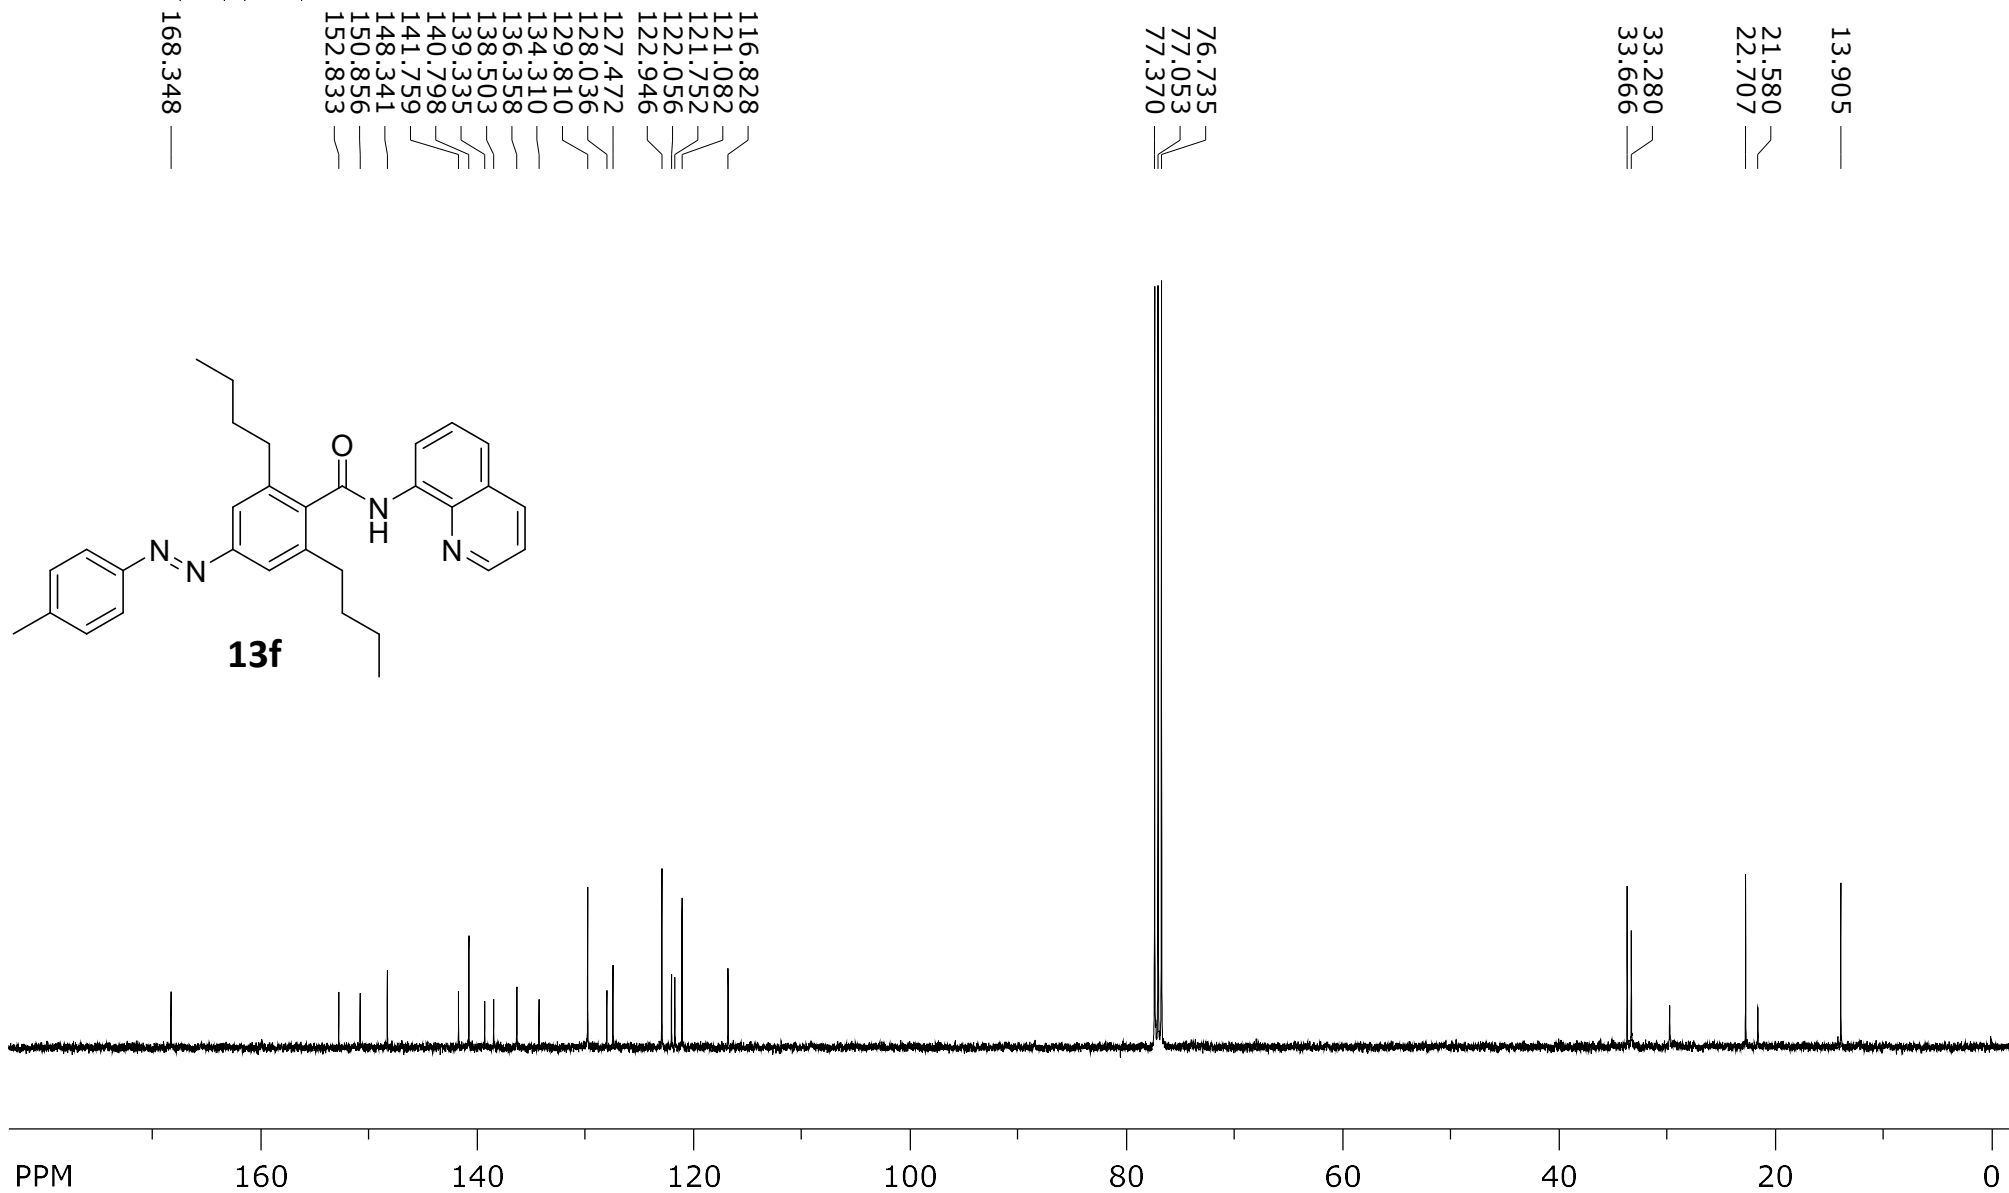

SpinWorks 4: RP-1420A2

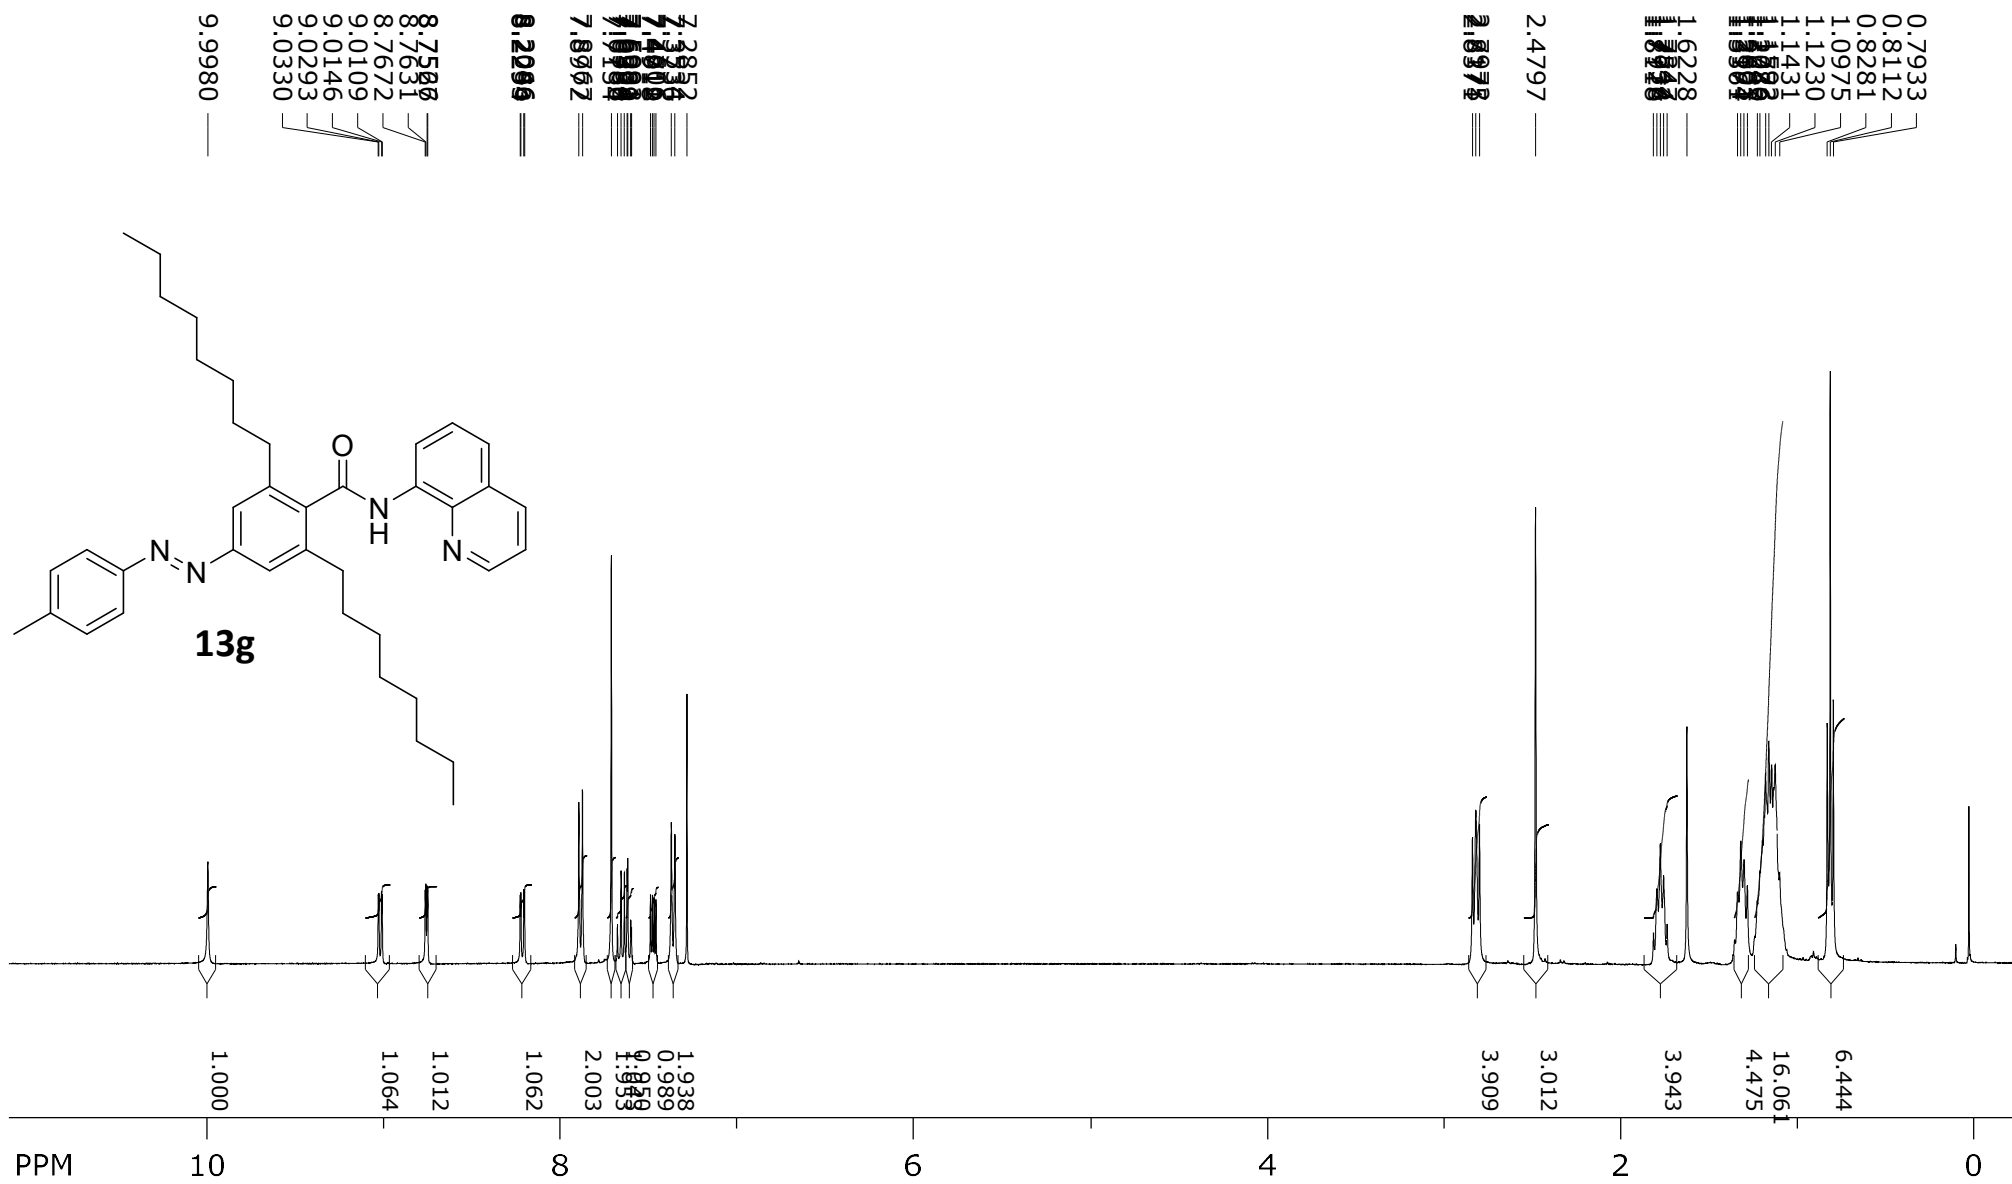

SpinWorks 4: RP-1420A2

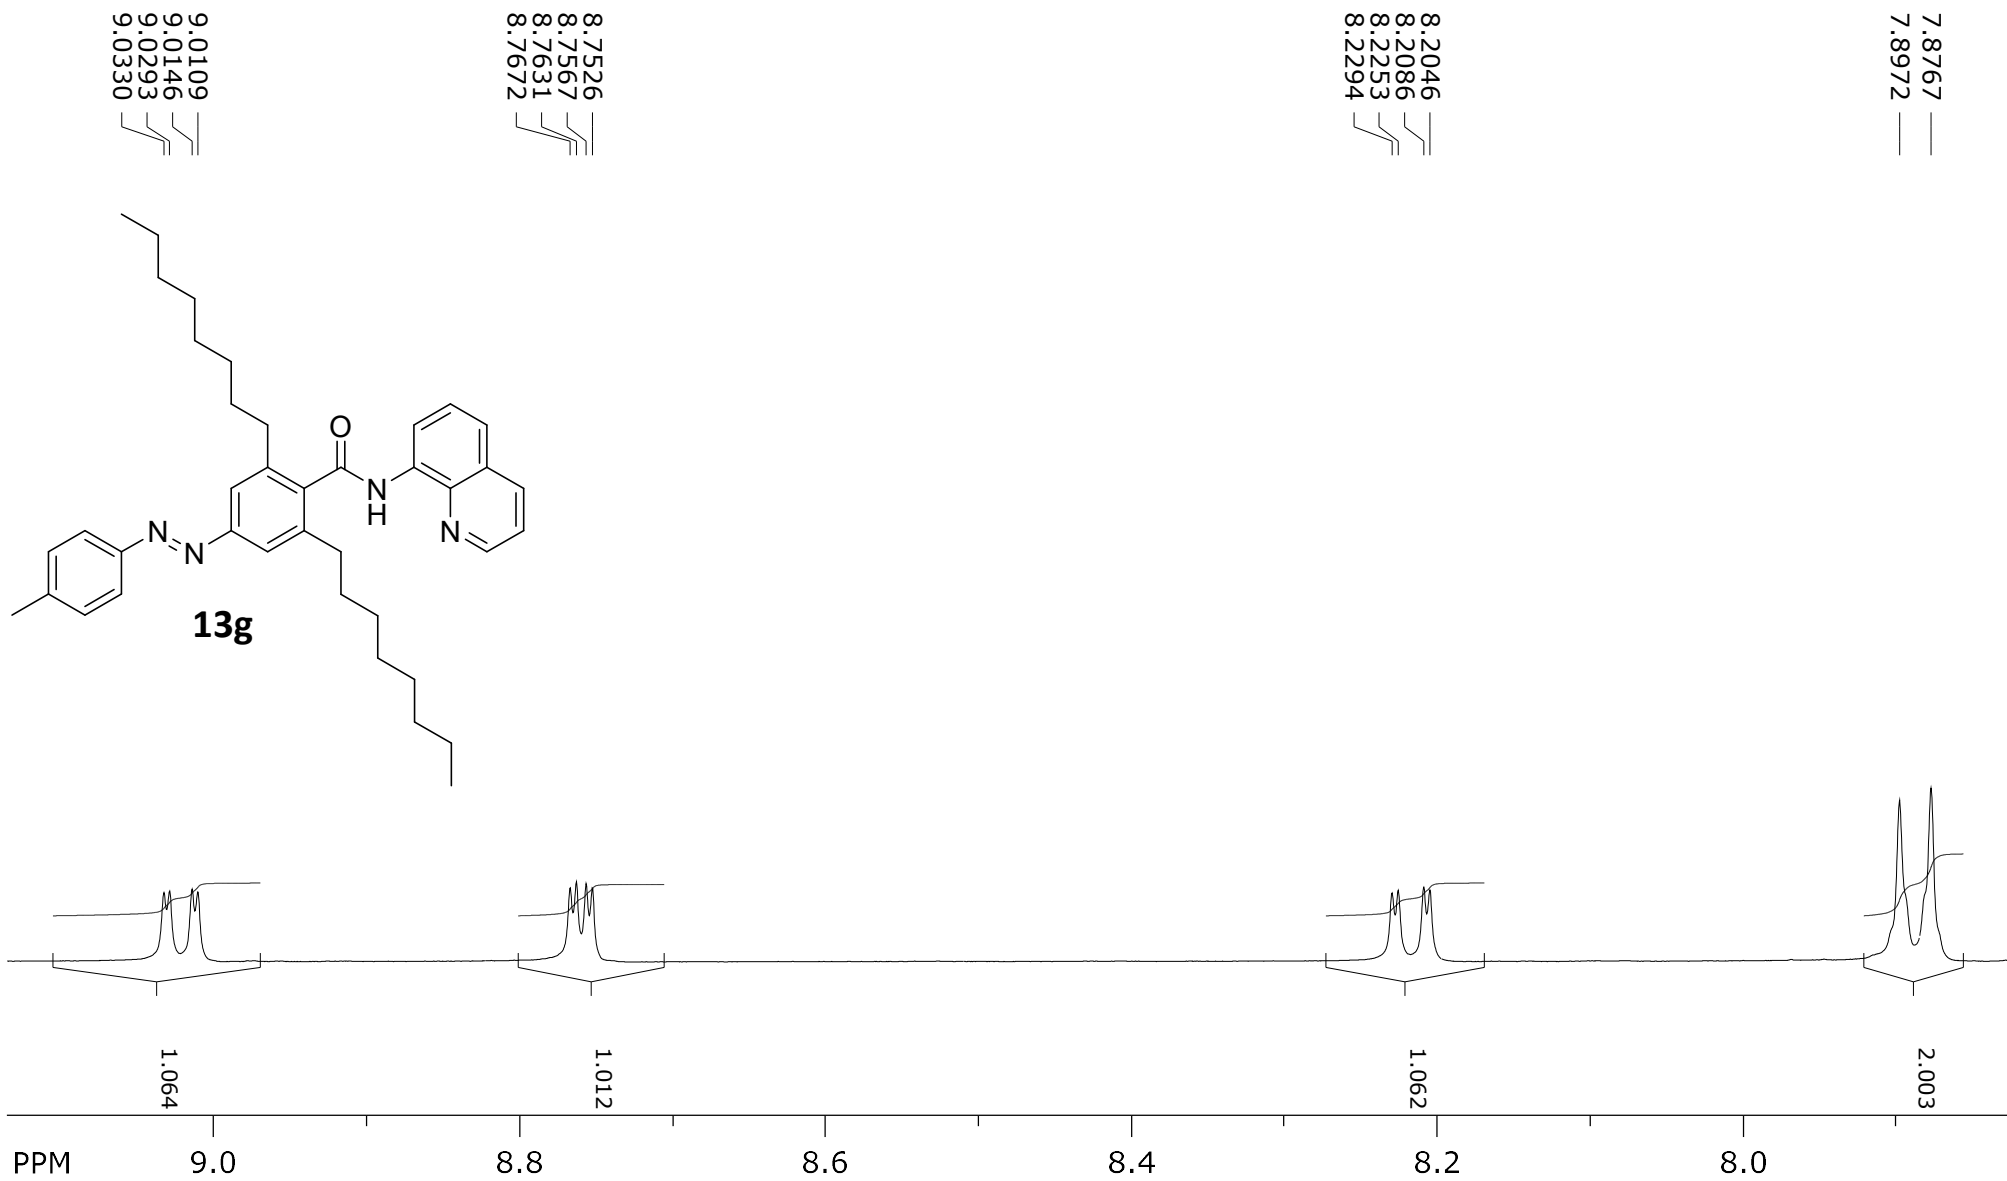

SpinWorks 4: RP-1420A2

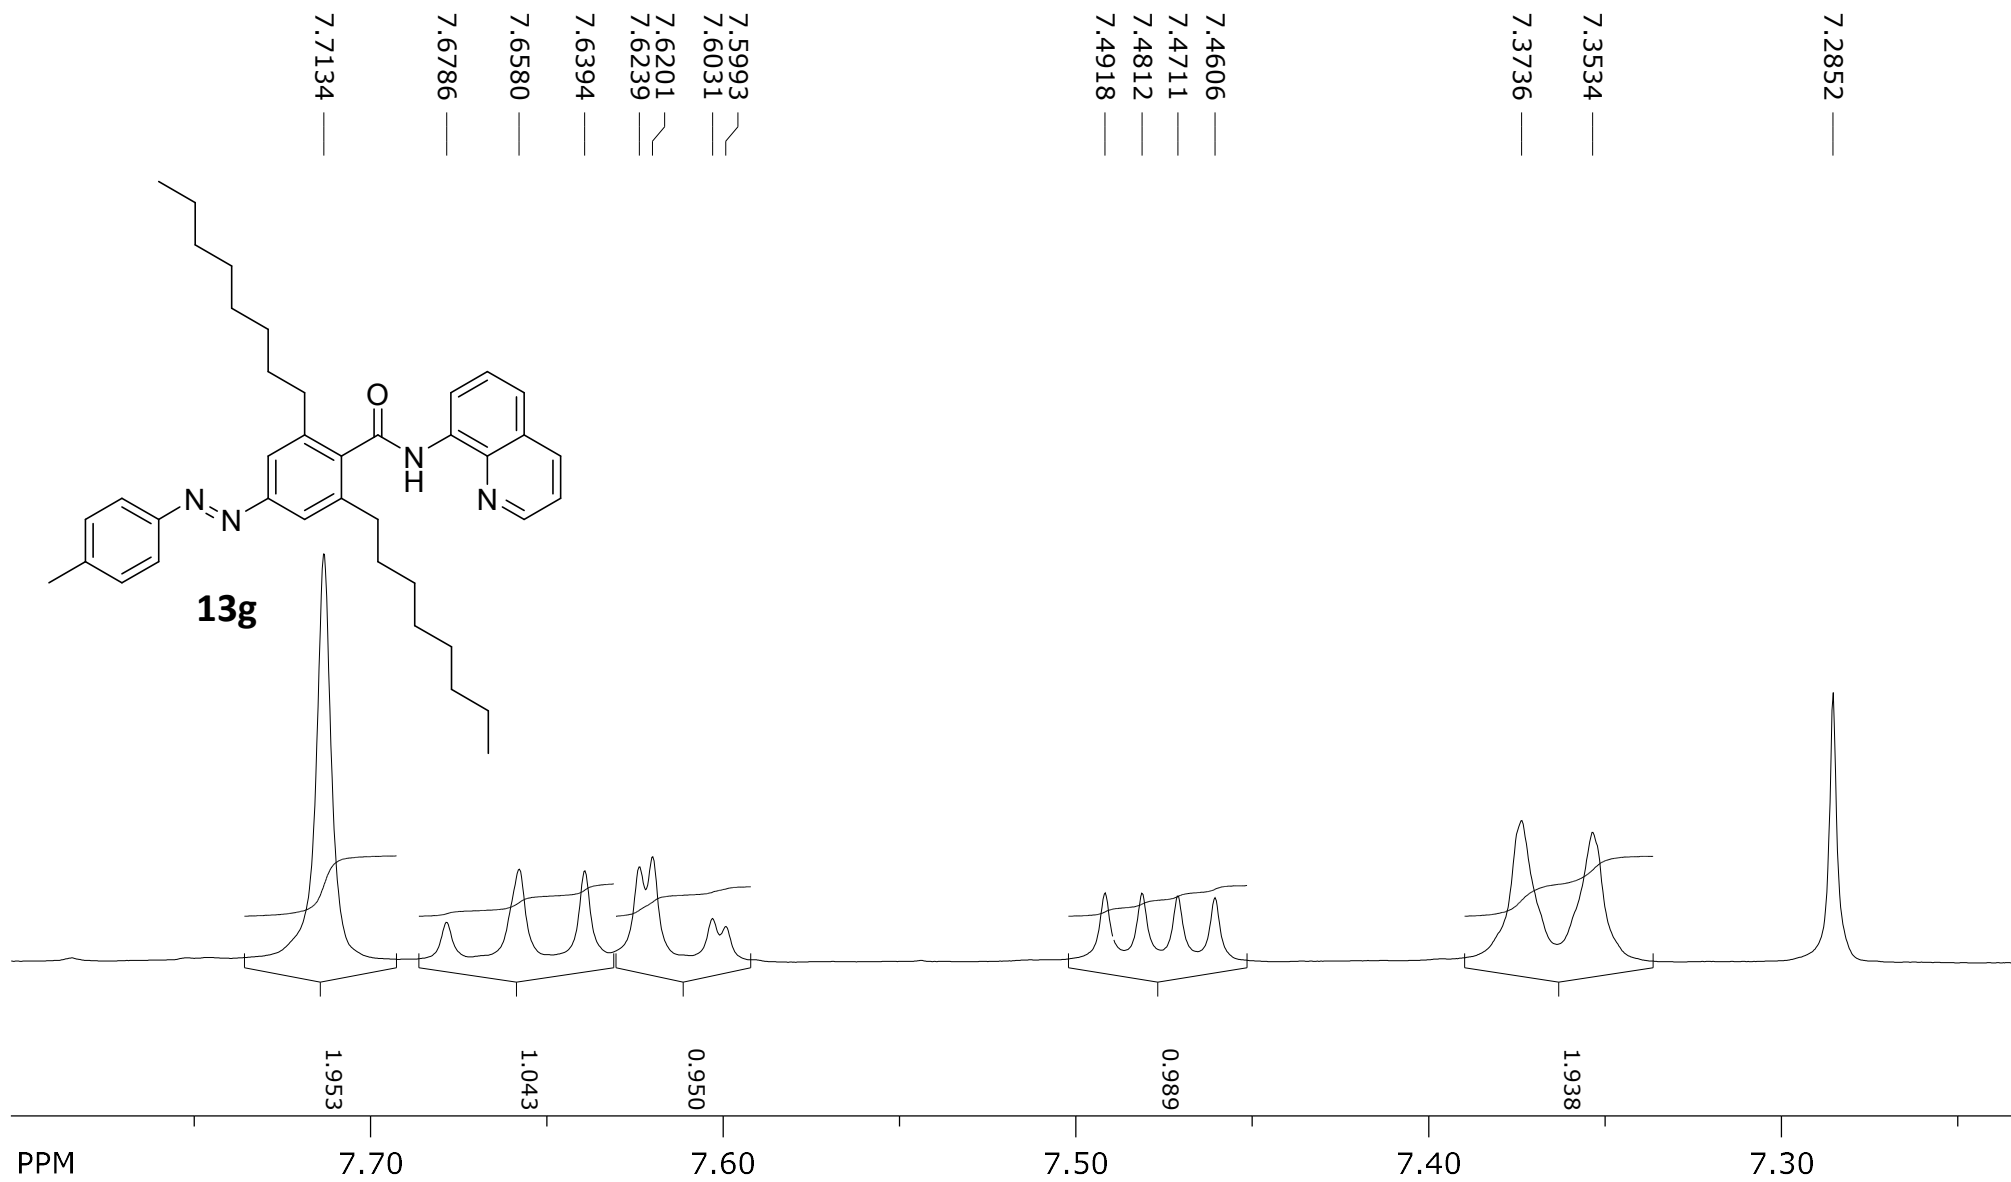

SpinWorks 4: RP-1420A2

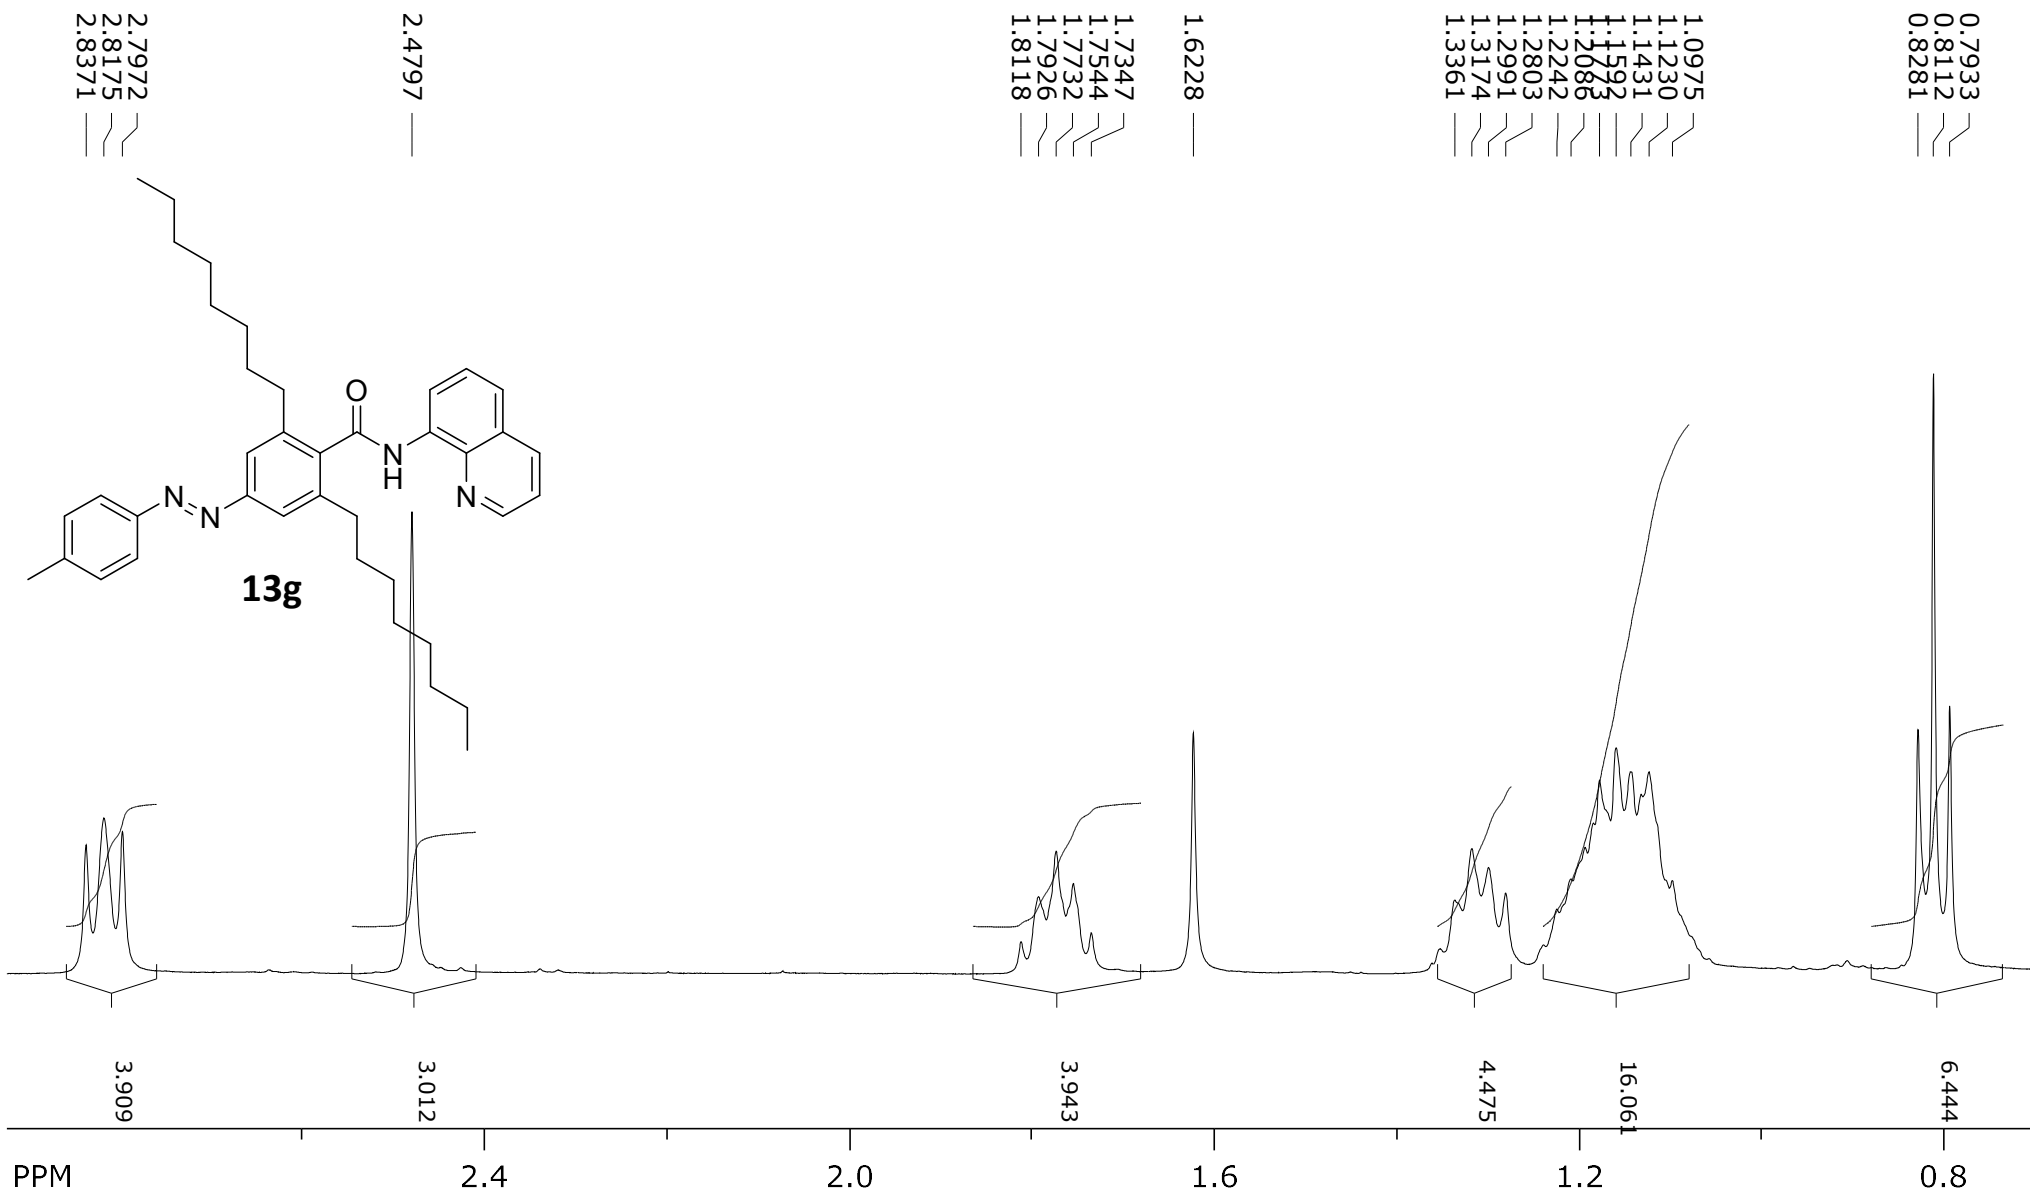

SpinWorks 4: RP 1420 A2  
C13CPD CDCl3 /opt/topspin3.5pl2/nmrdata nmrsu 48

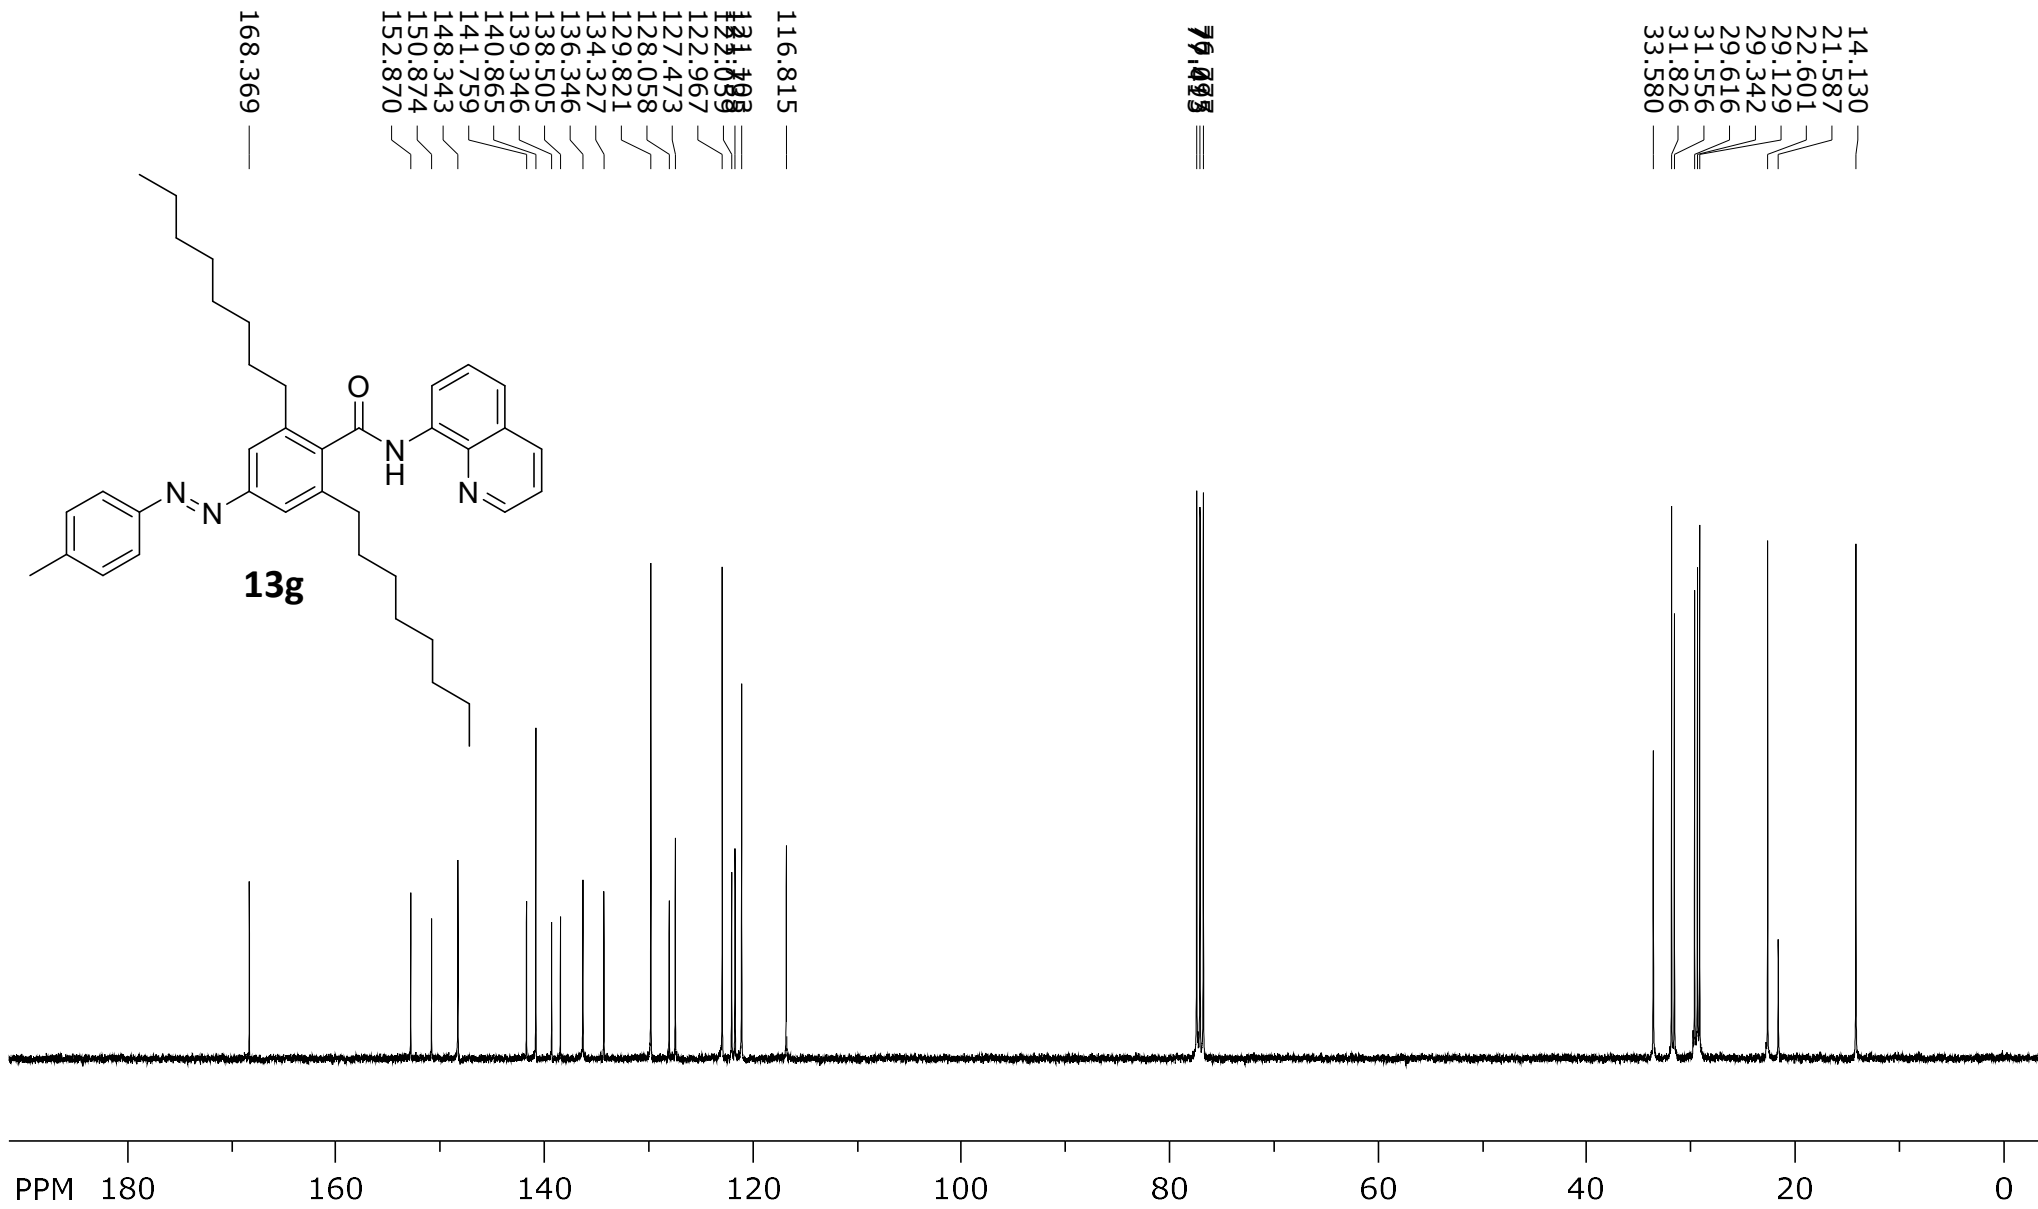



SpinWorks 4: RP 1420 A2  
C13CPD CDCl3 /opt/topspin3.5pl2/nmrdata nmrsu 48

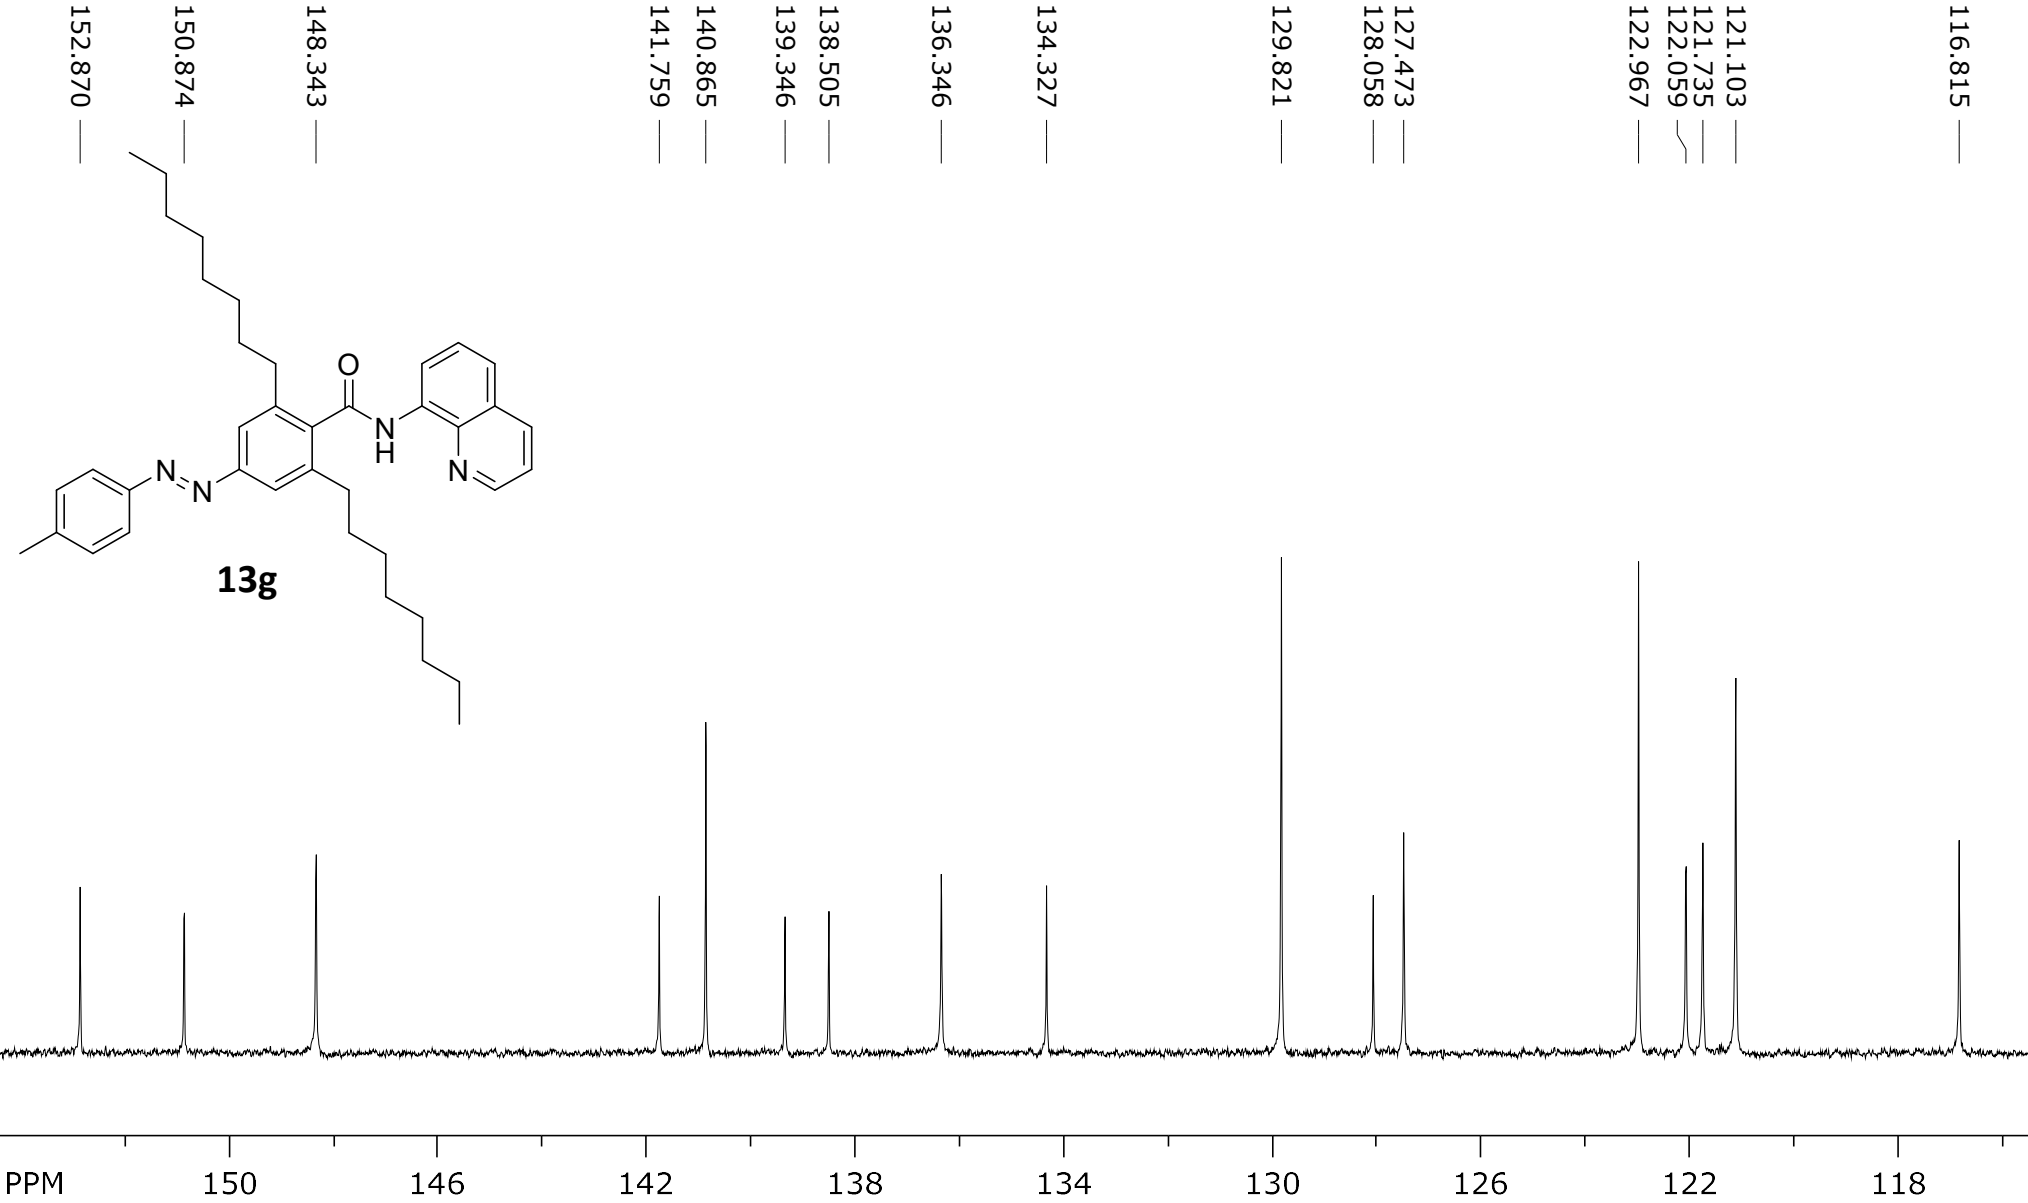

SpinWorks 4: RP 1420 A2  
C13CPD CDCl3 /opt/topspin3.5pl2/nmrdata nmrsu 48

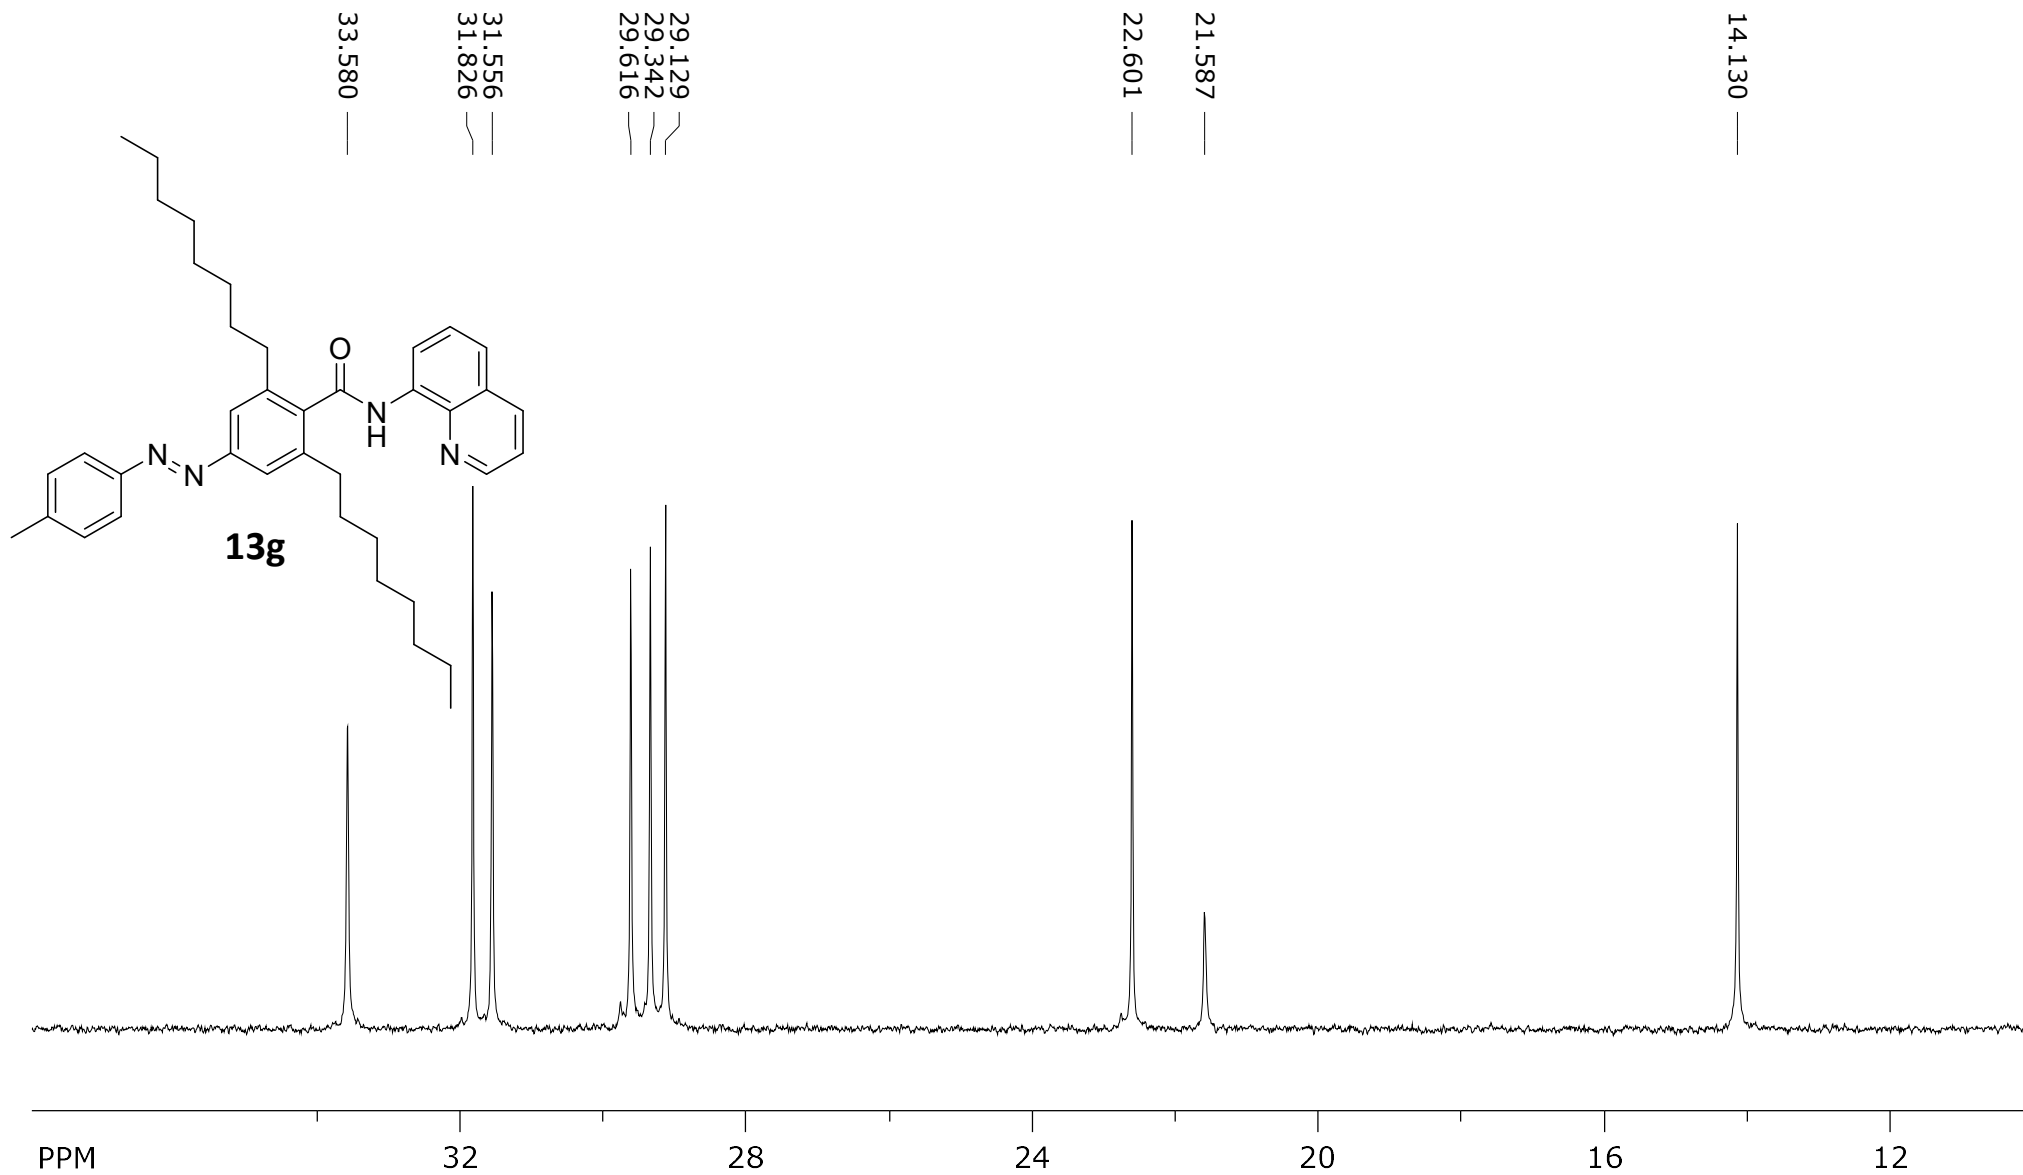



SpinWorks 4: RP 1407 A2  
PROTON CDCl3 /opt/topspin3.5pl2/nmrdata nmrsu 1

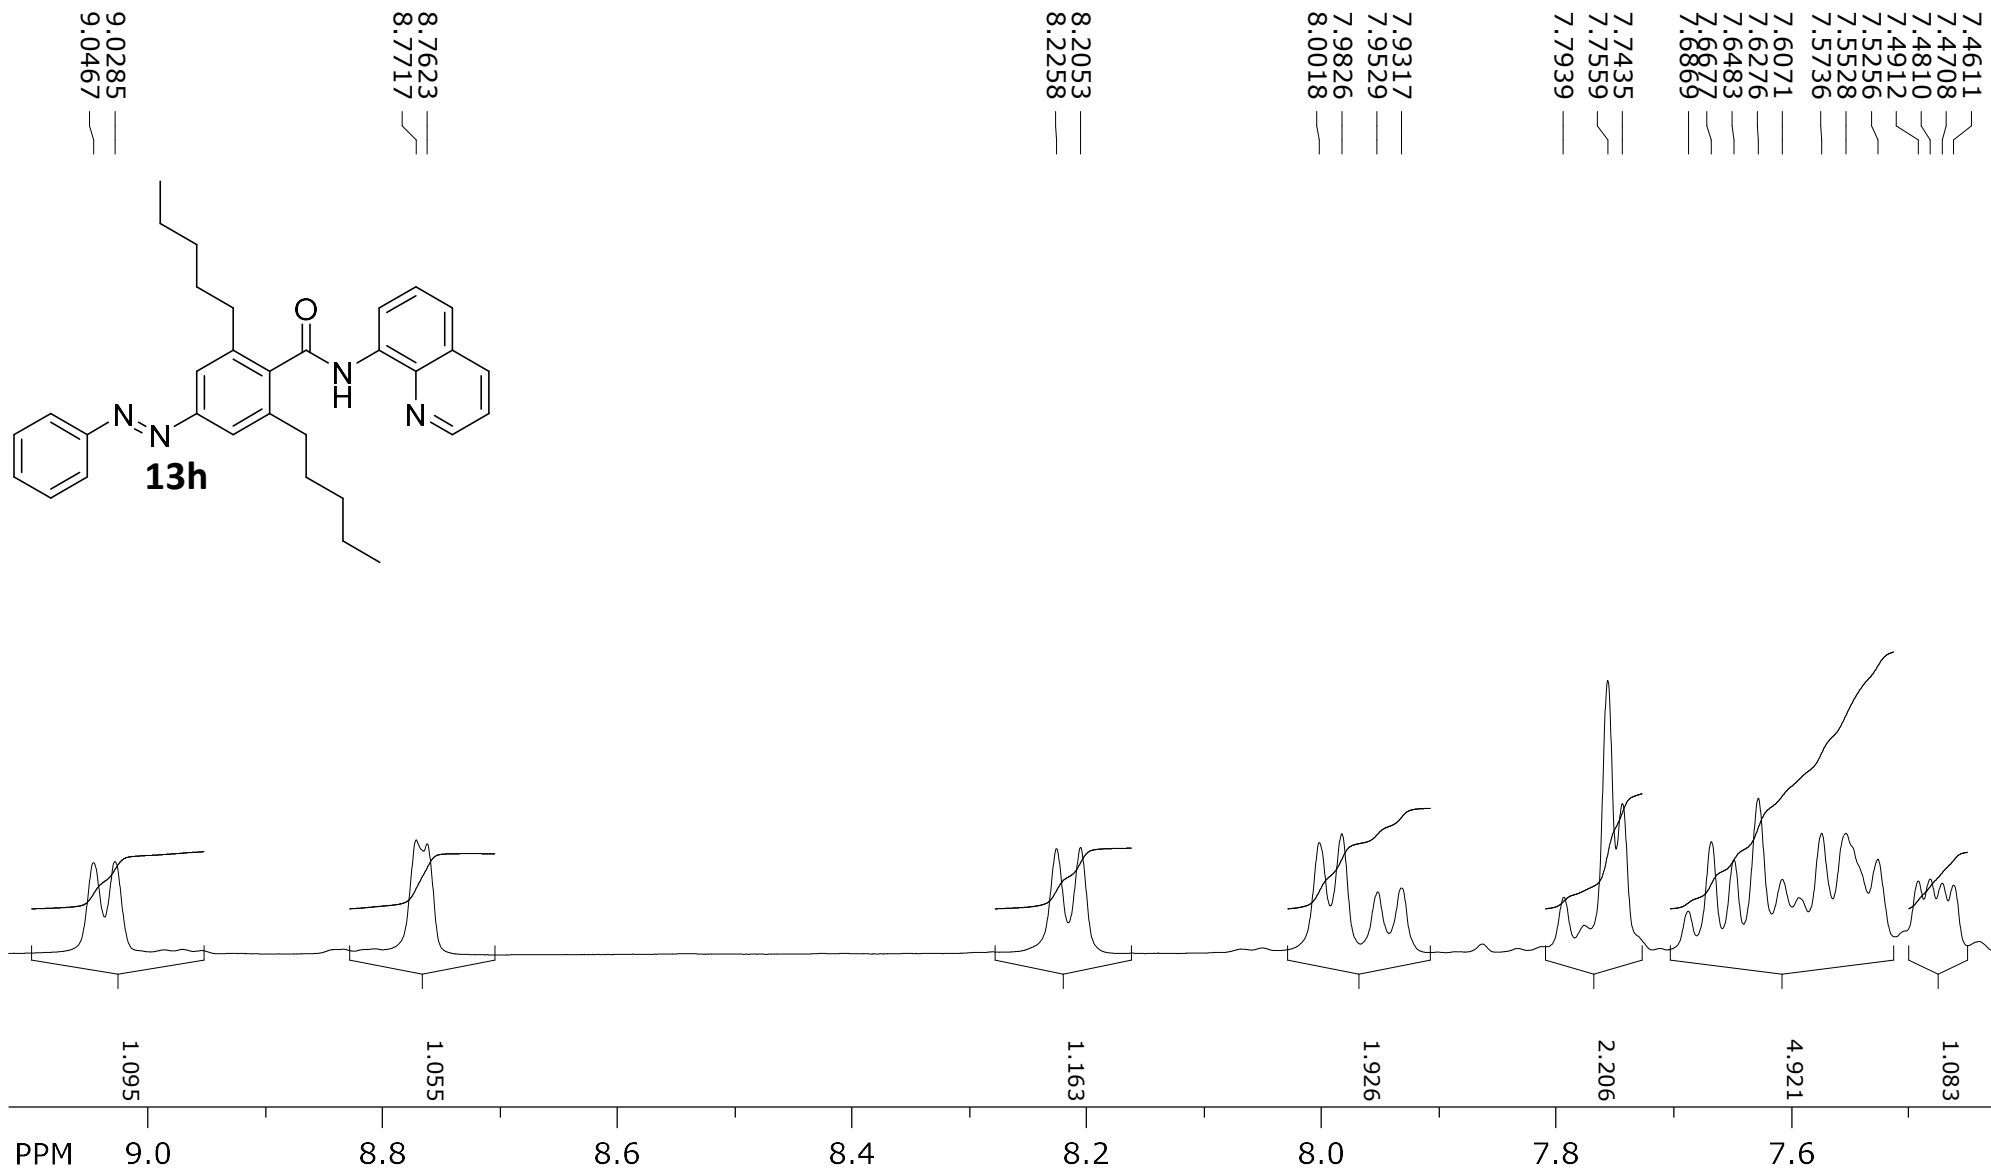

SpinWorks 4: RP 1407 A2  
PROTON CDCl3 /opt/topspin3.5pl2/nmrdata nmrsu 1

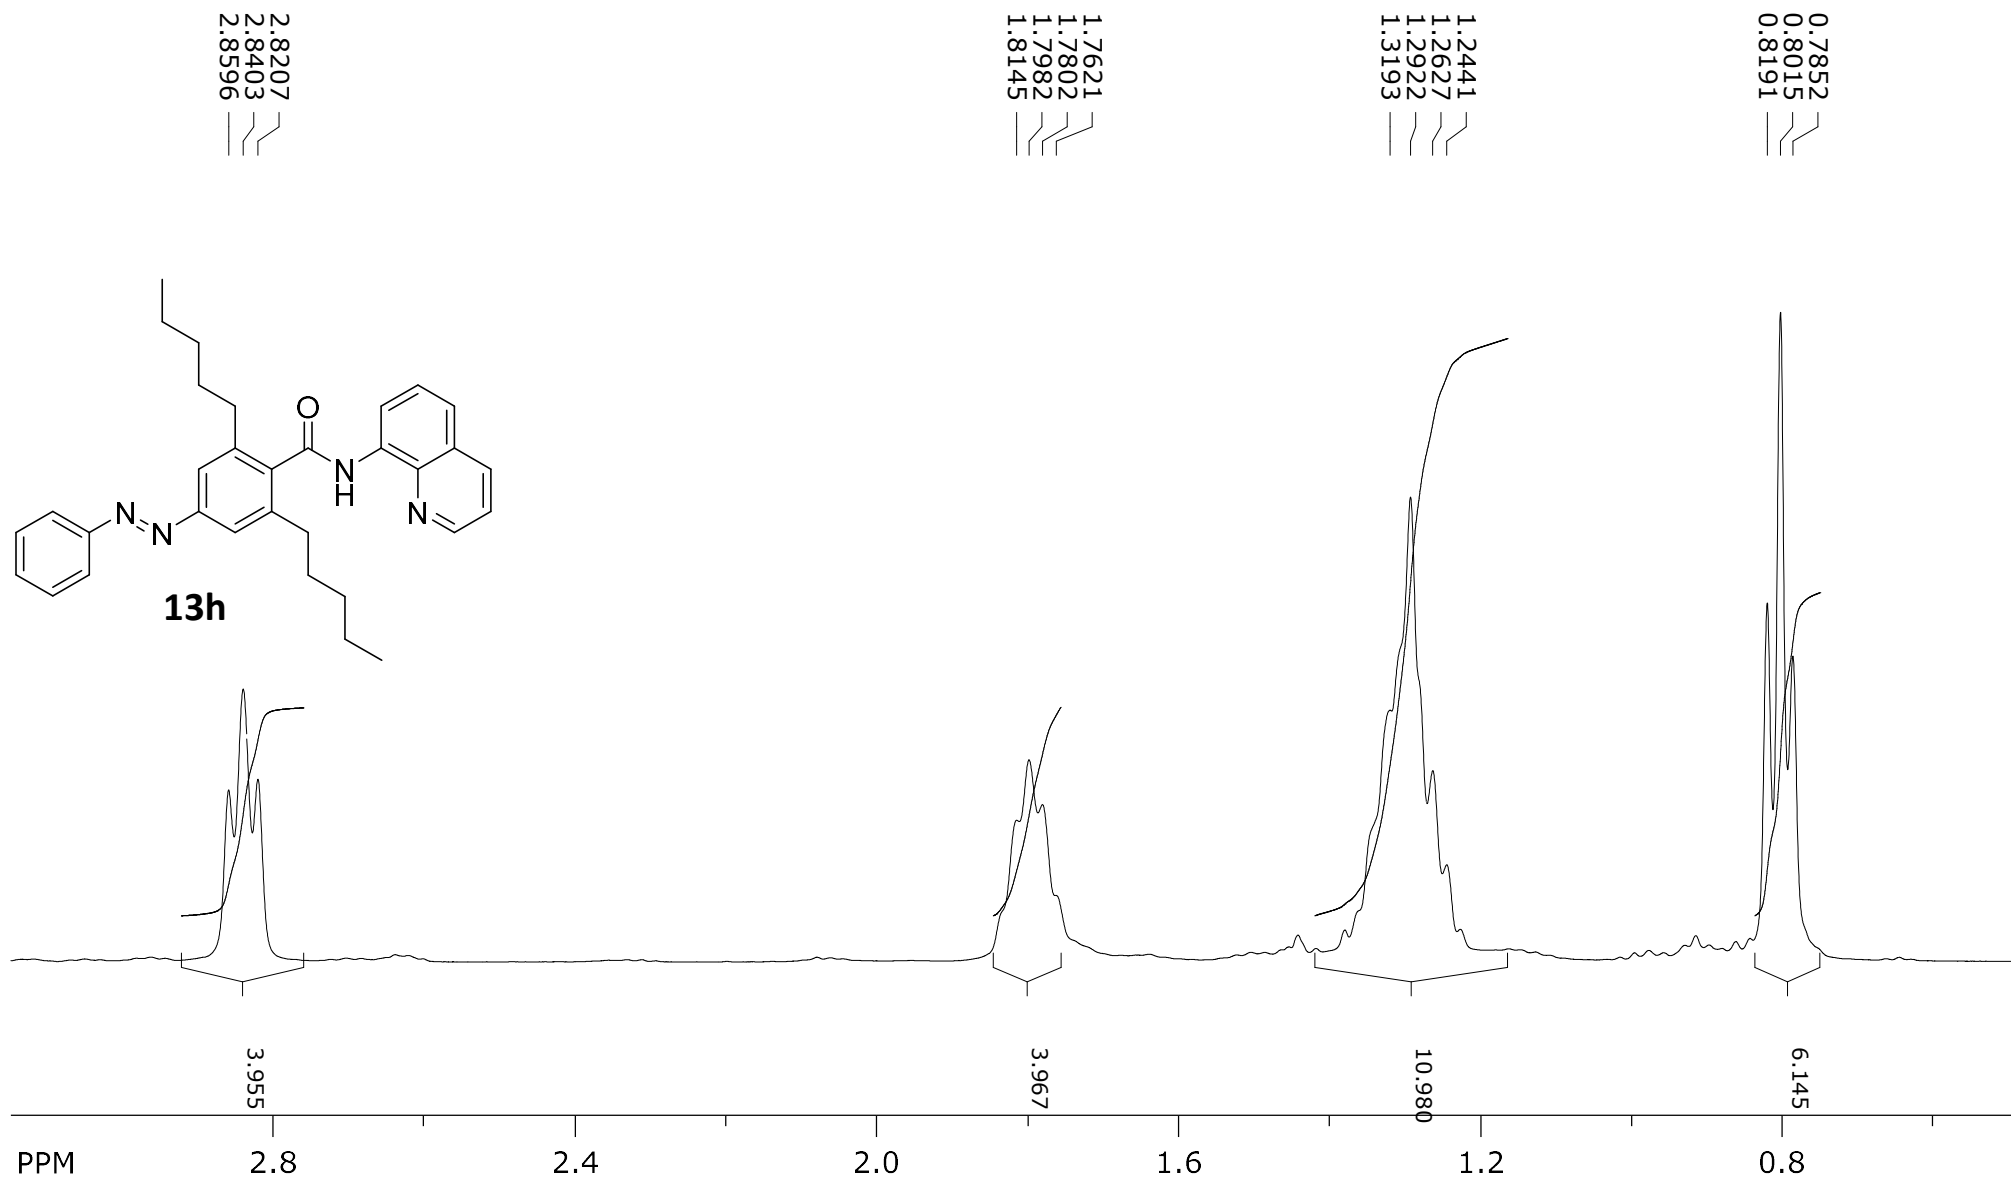

SpinWorks 4: SAB170303  
C13CPD CDCl3 {D:\Spectra} nmr 8

168.265  
152.772  
152.790  
148.342  
140.874  
139.621  
138.515  
136.341  
134.313  
131.128  
129.136  
128.039  
127.463  
122.926  
122.054  
121.732  
121.182  
116.815

76.796  
77.050  
77.305

31.154  
31.760  
33.521

22.436

13.903

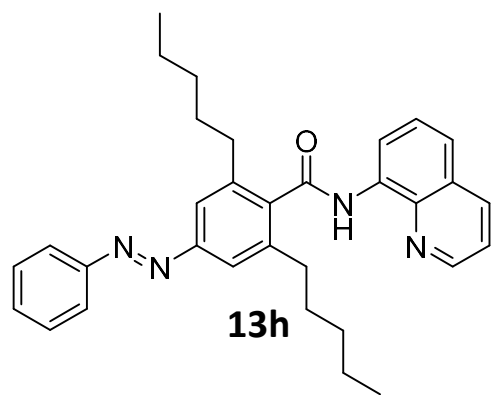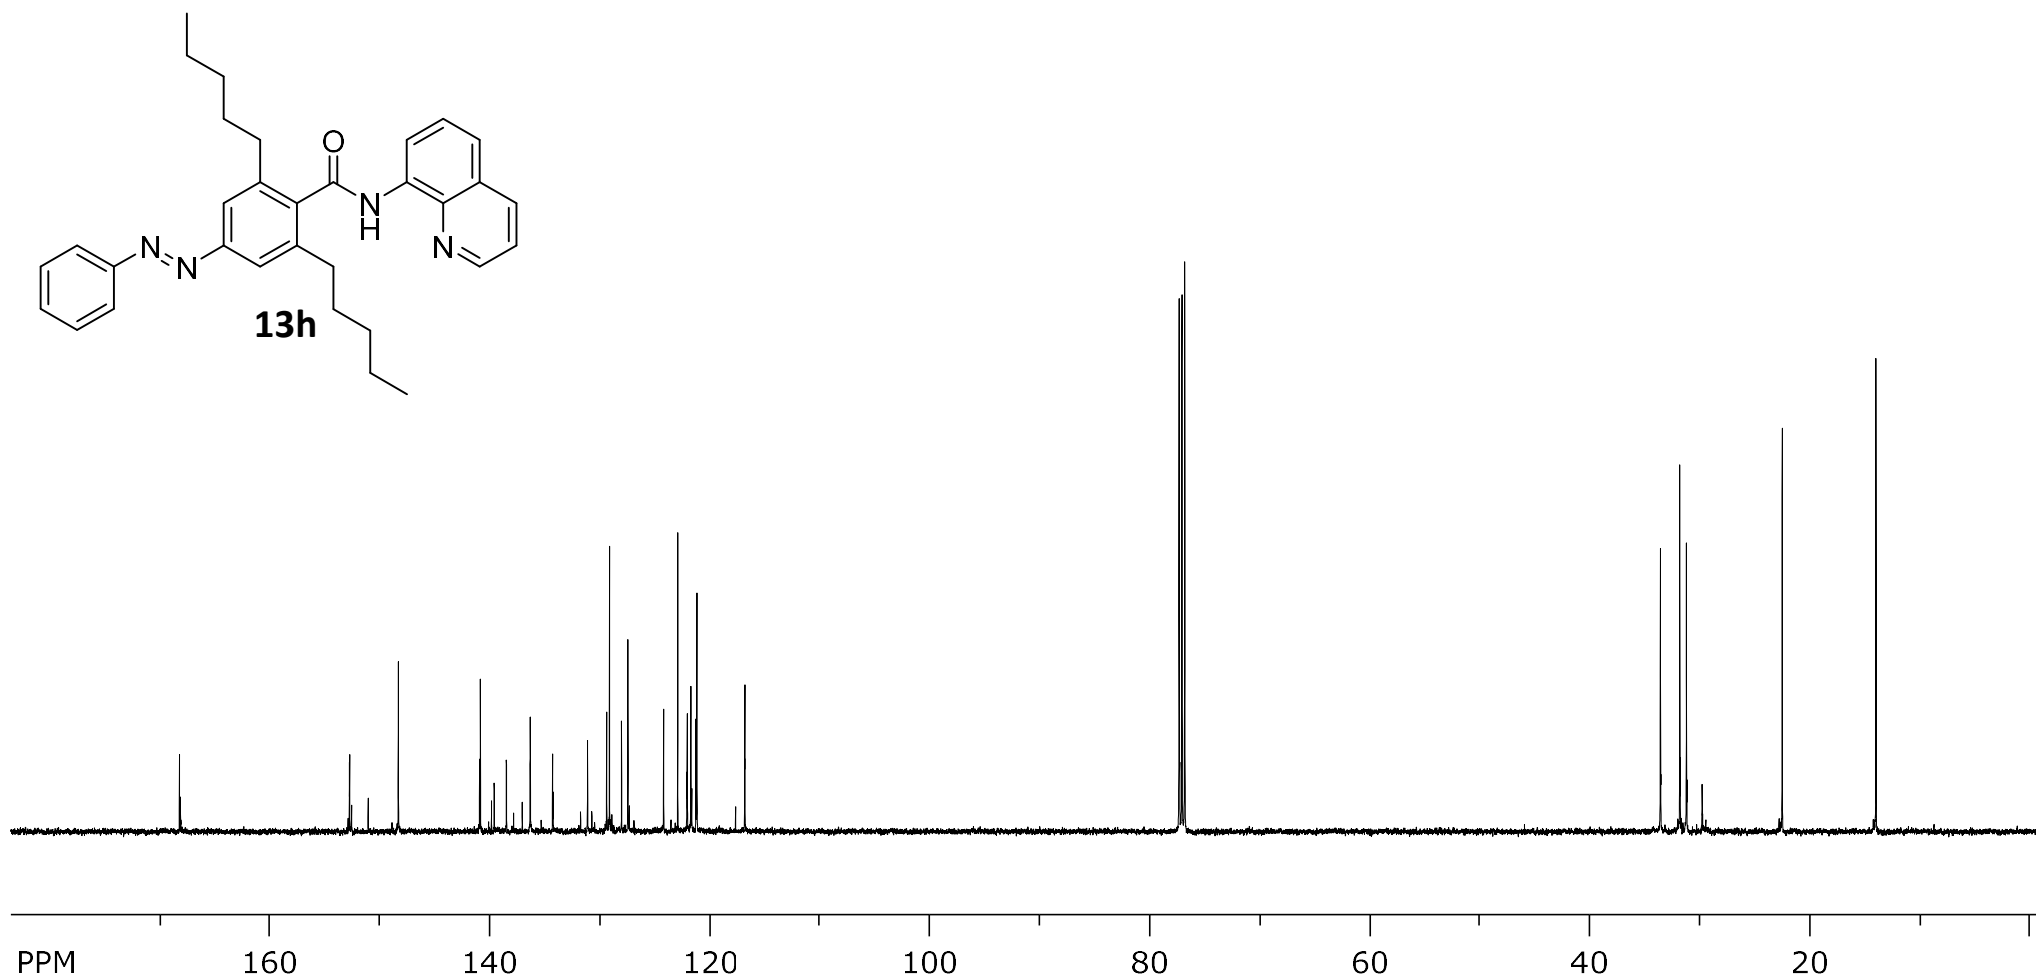

SpinWorks 4: SAB170303  
C13CPD CDCl3 {D:\Spectra} nmr 8

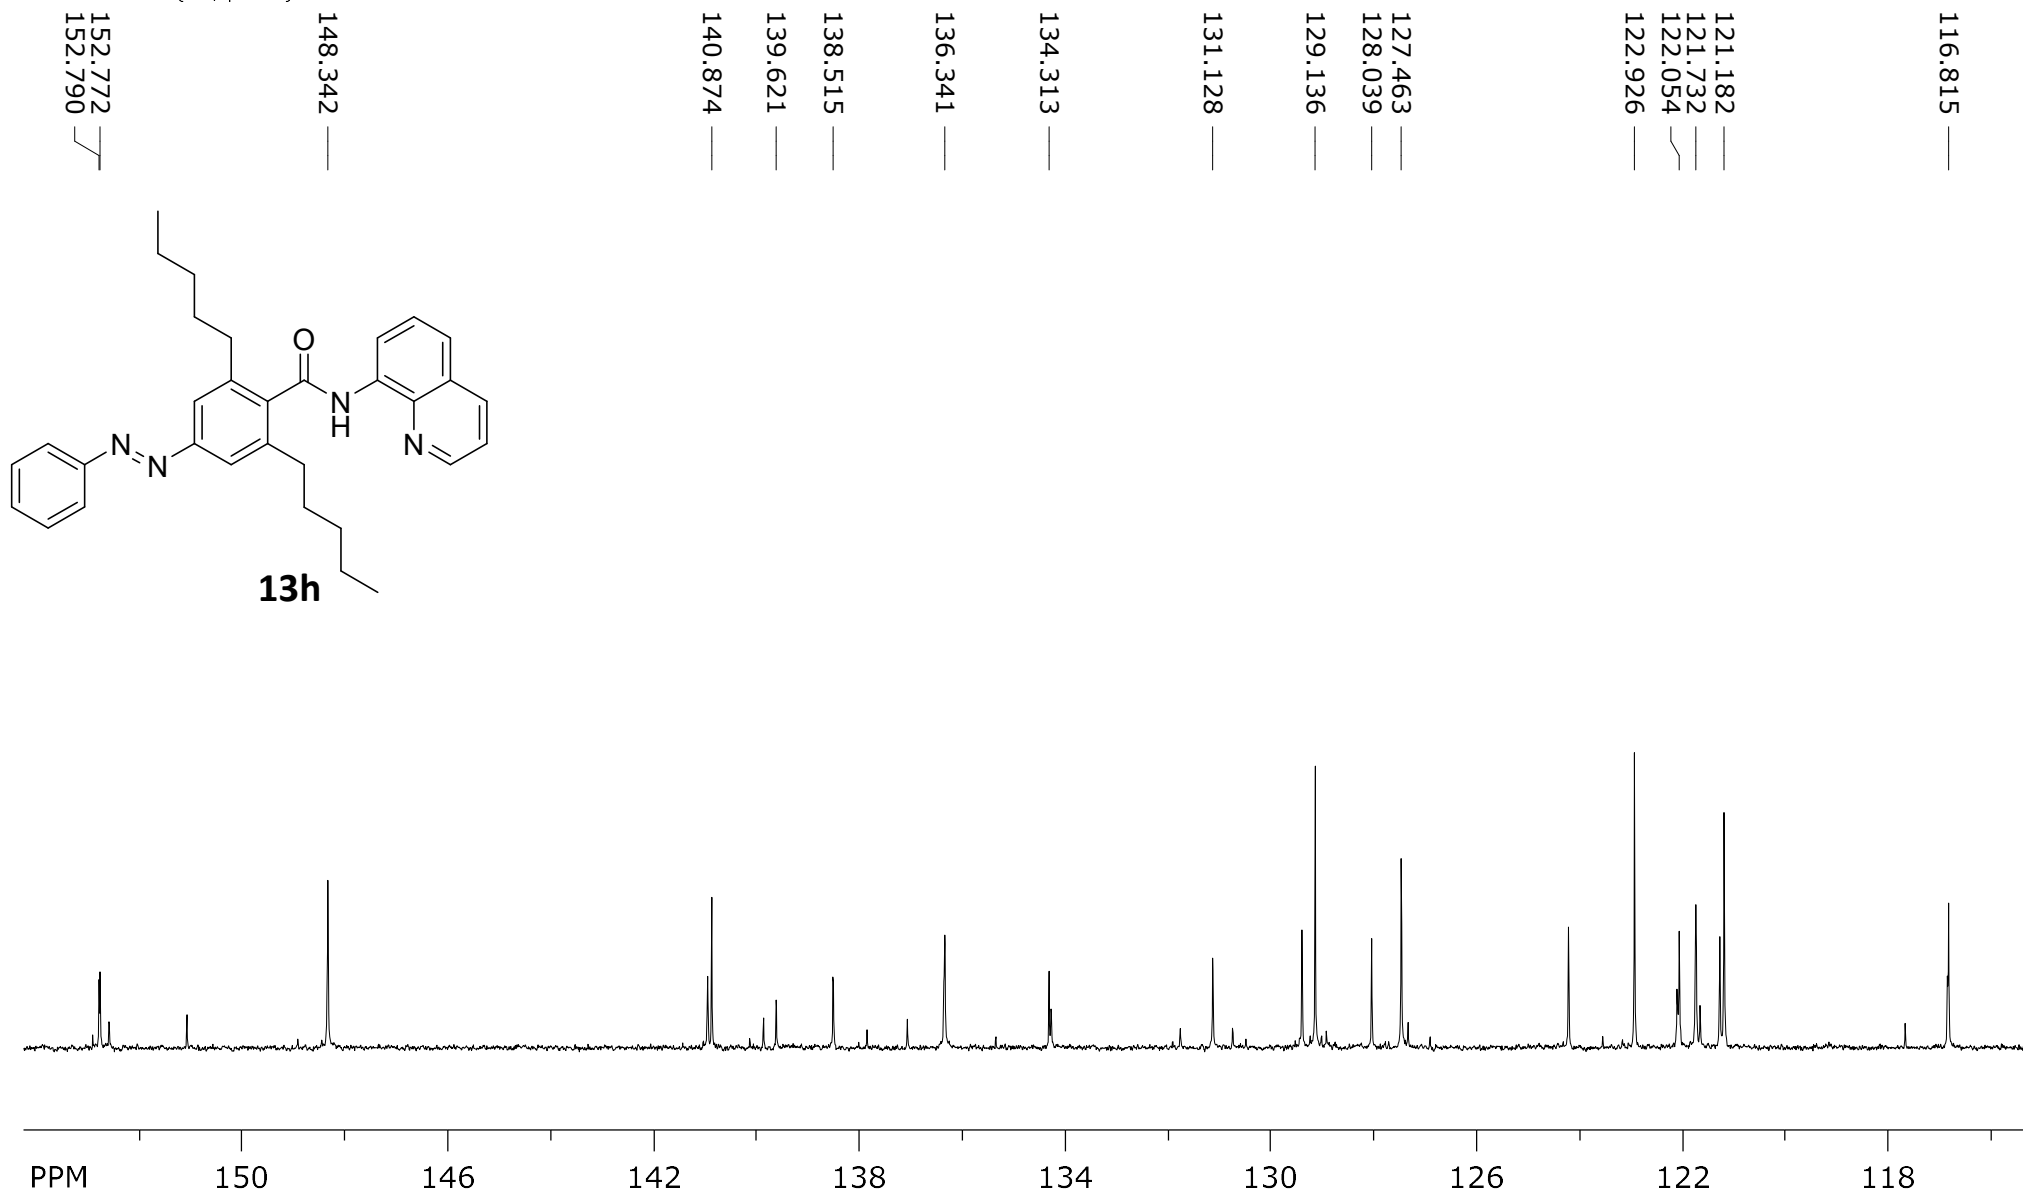

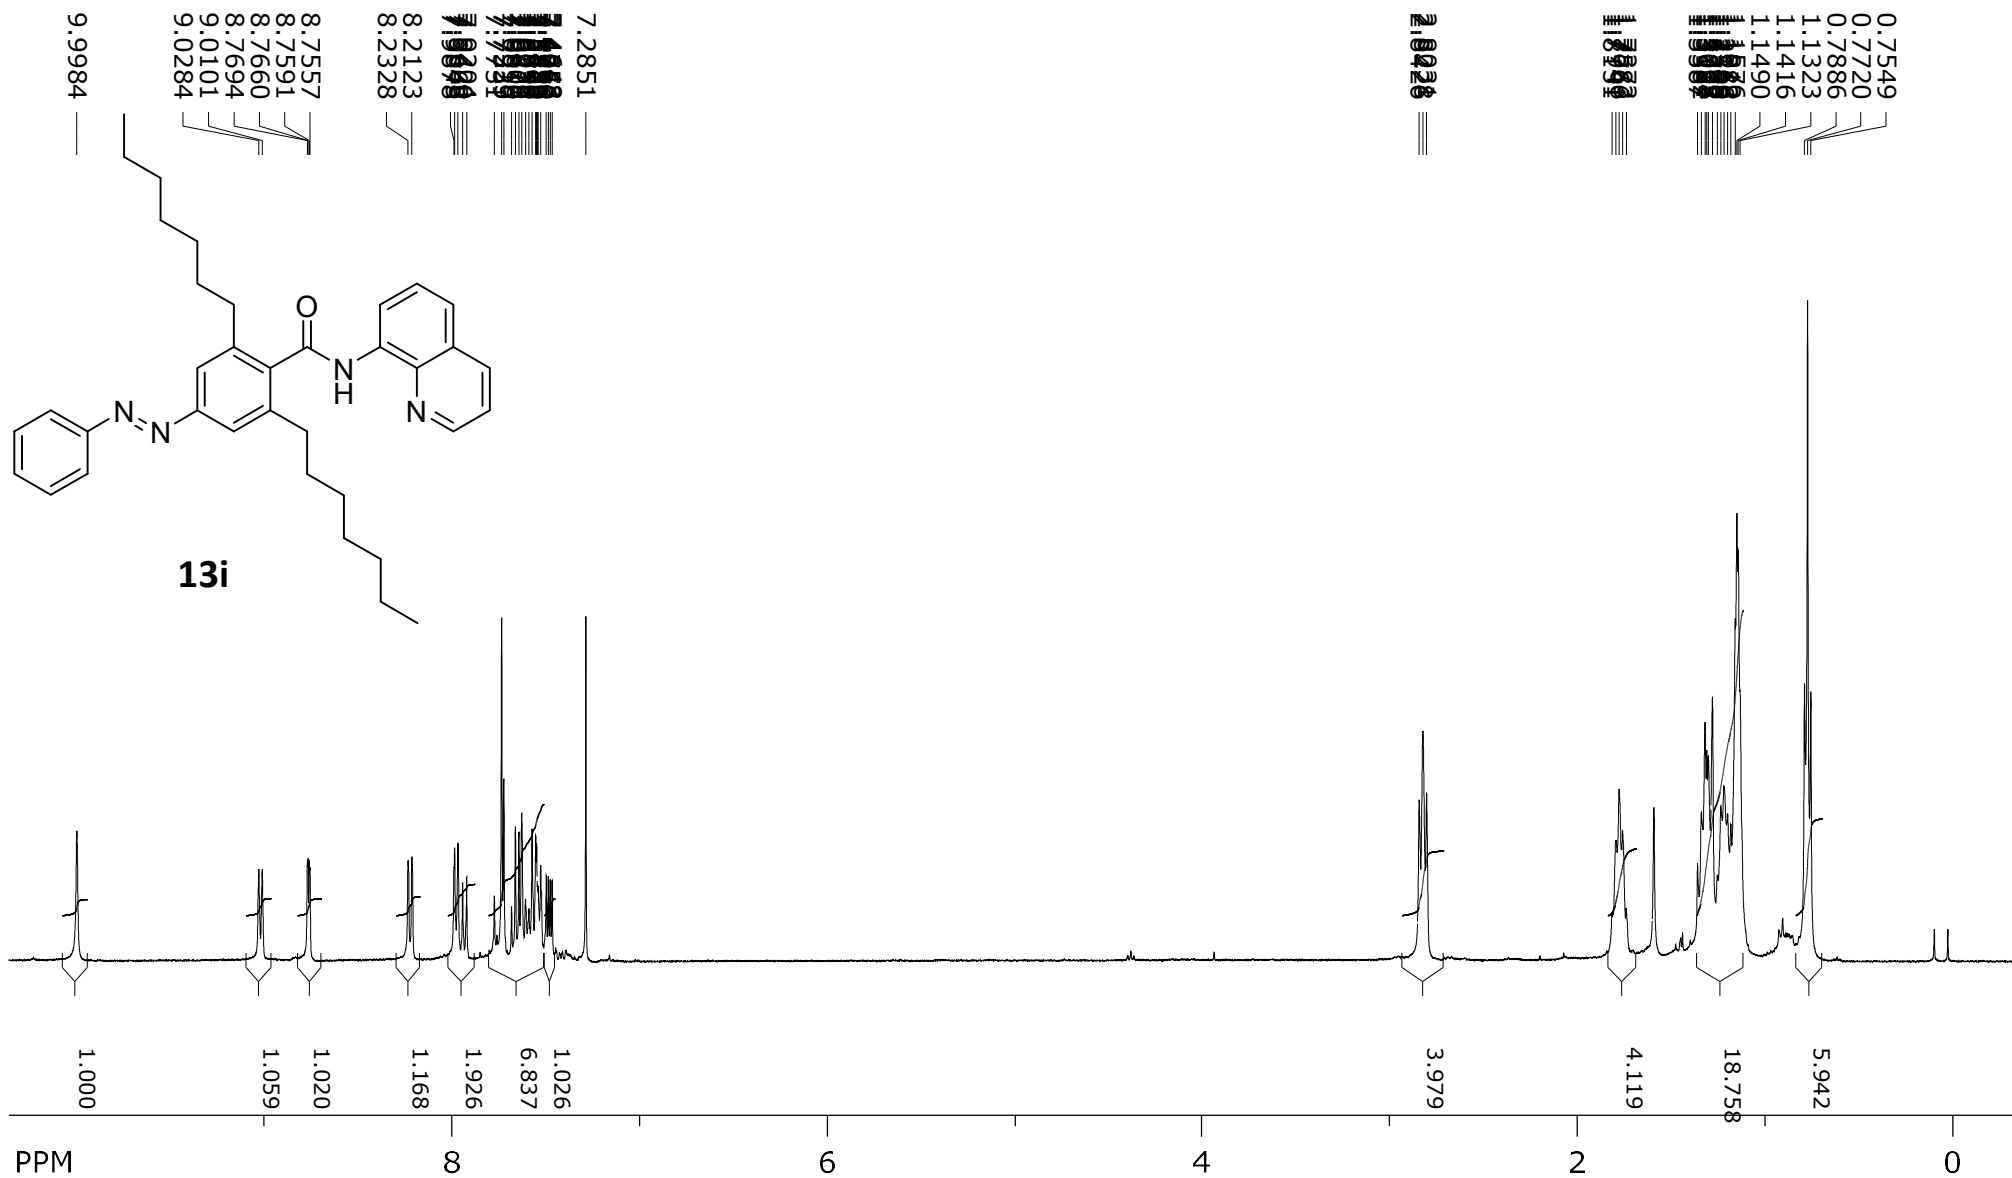



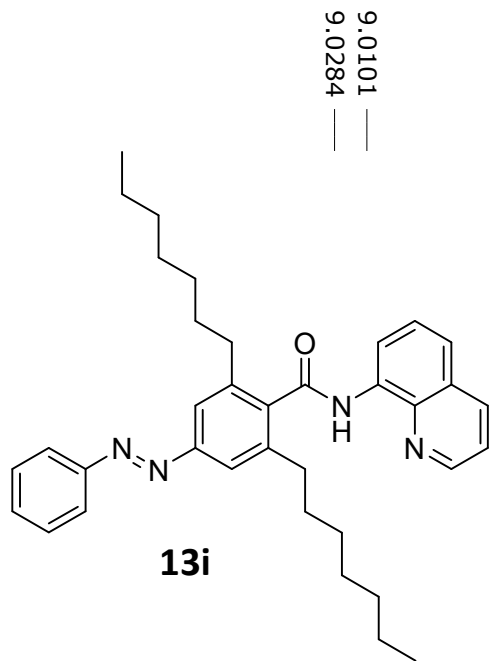

9.0101  
9.0284

8.7557  
8.7591  
8.7660  
8.7694

8.2123  
8.2328

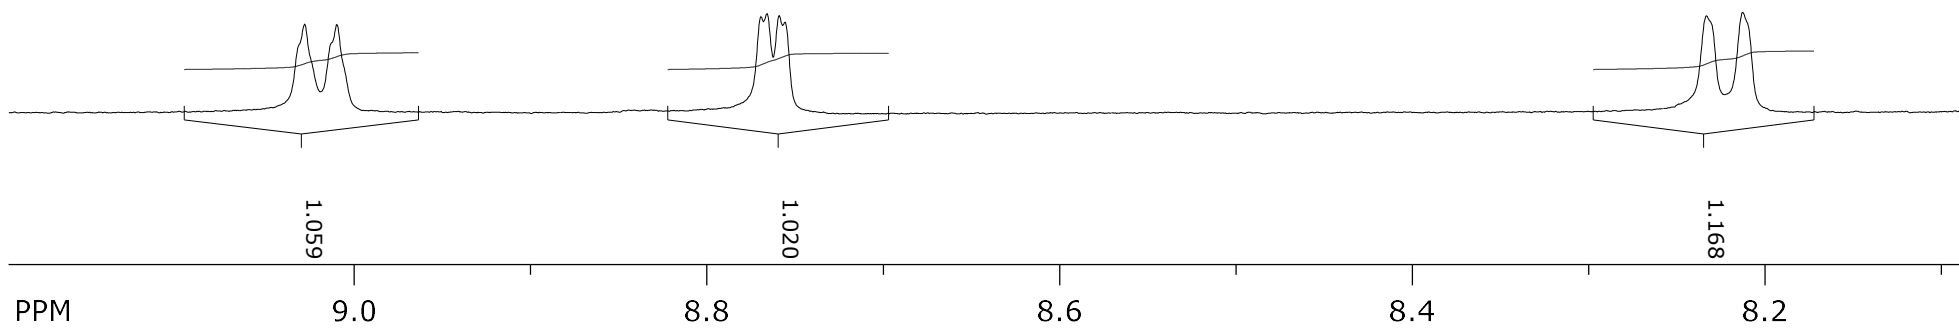

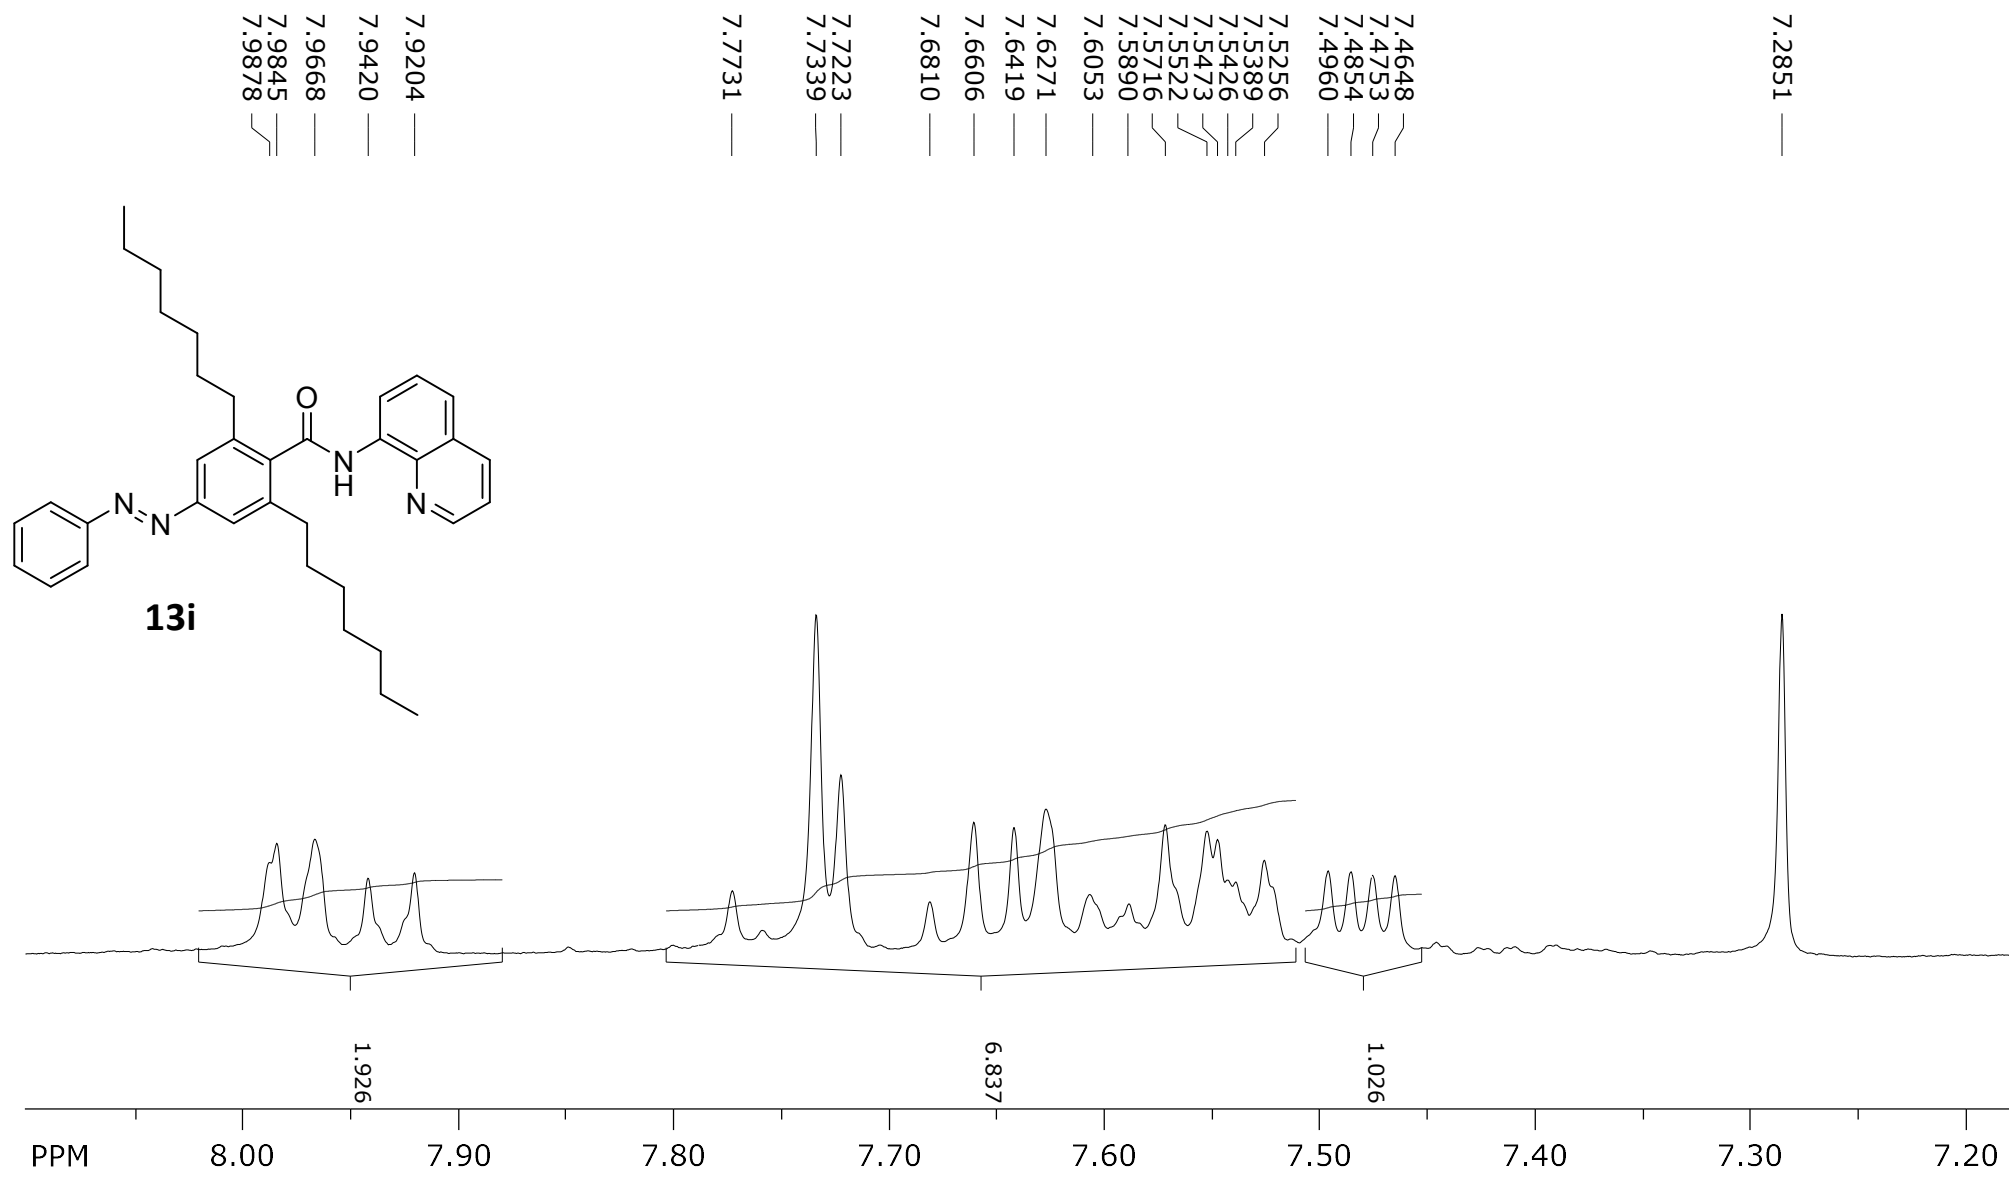

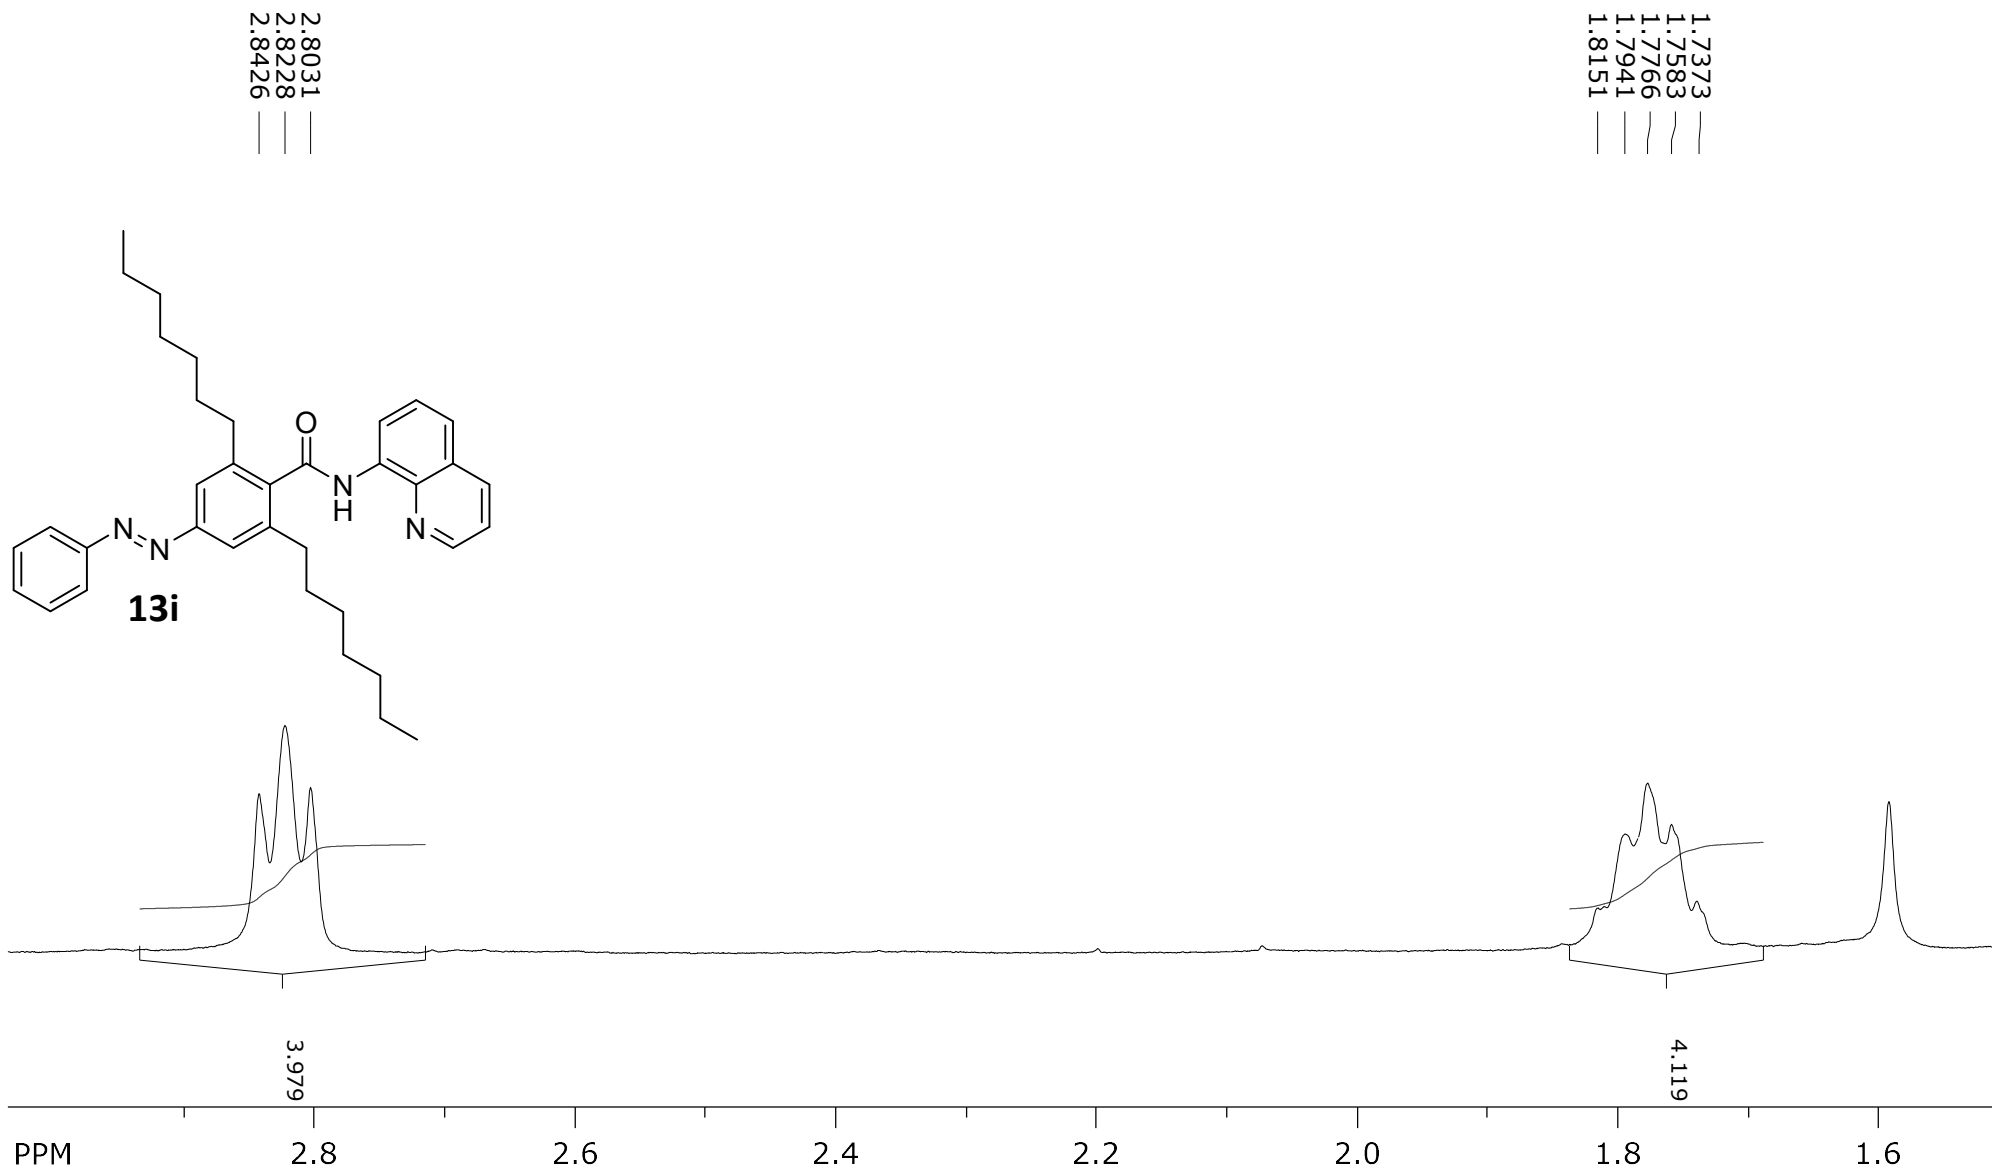

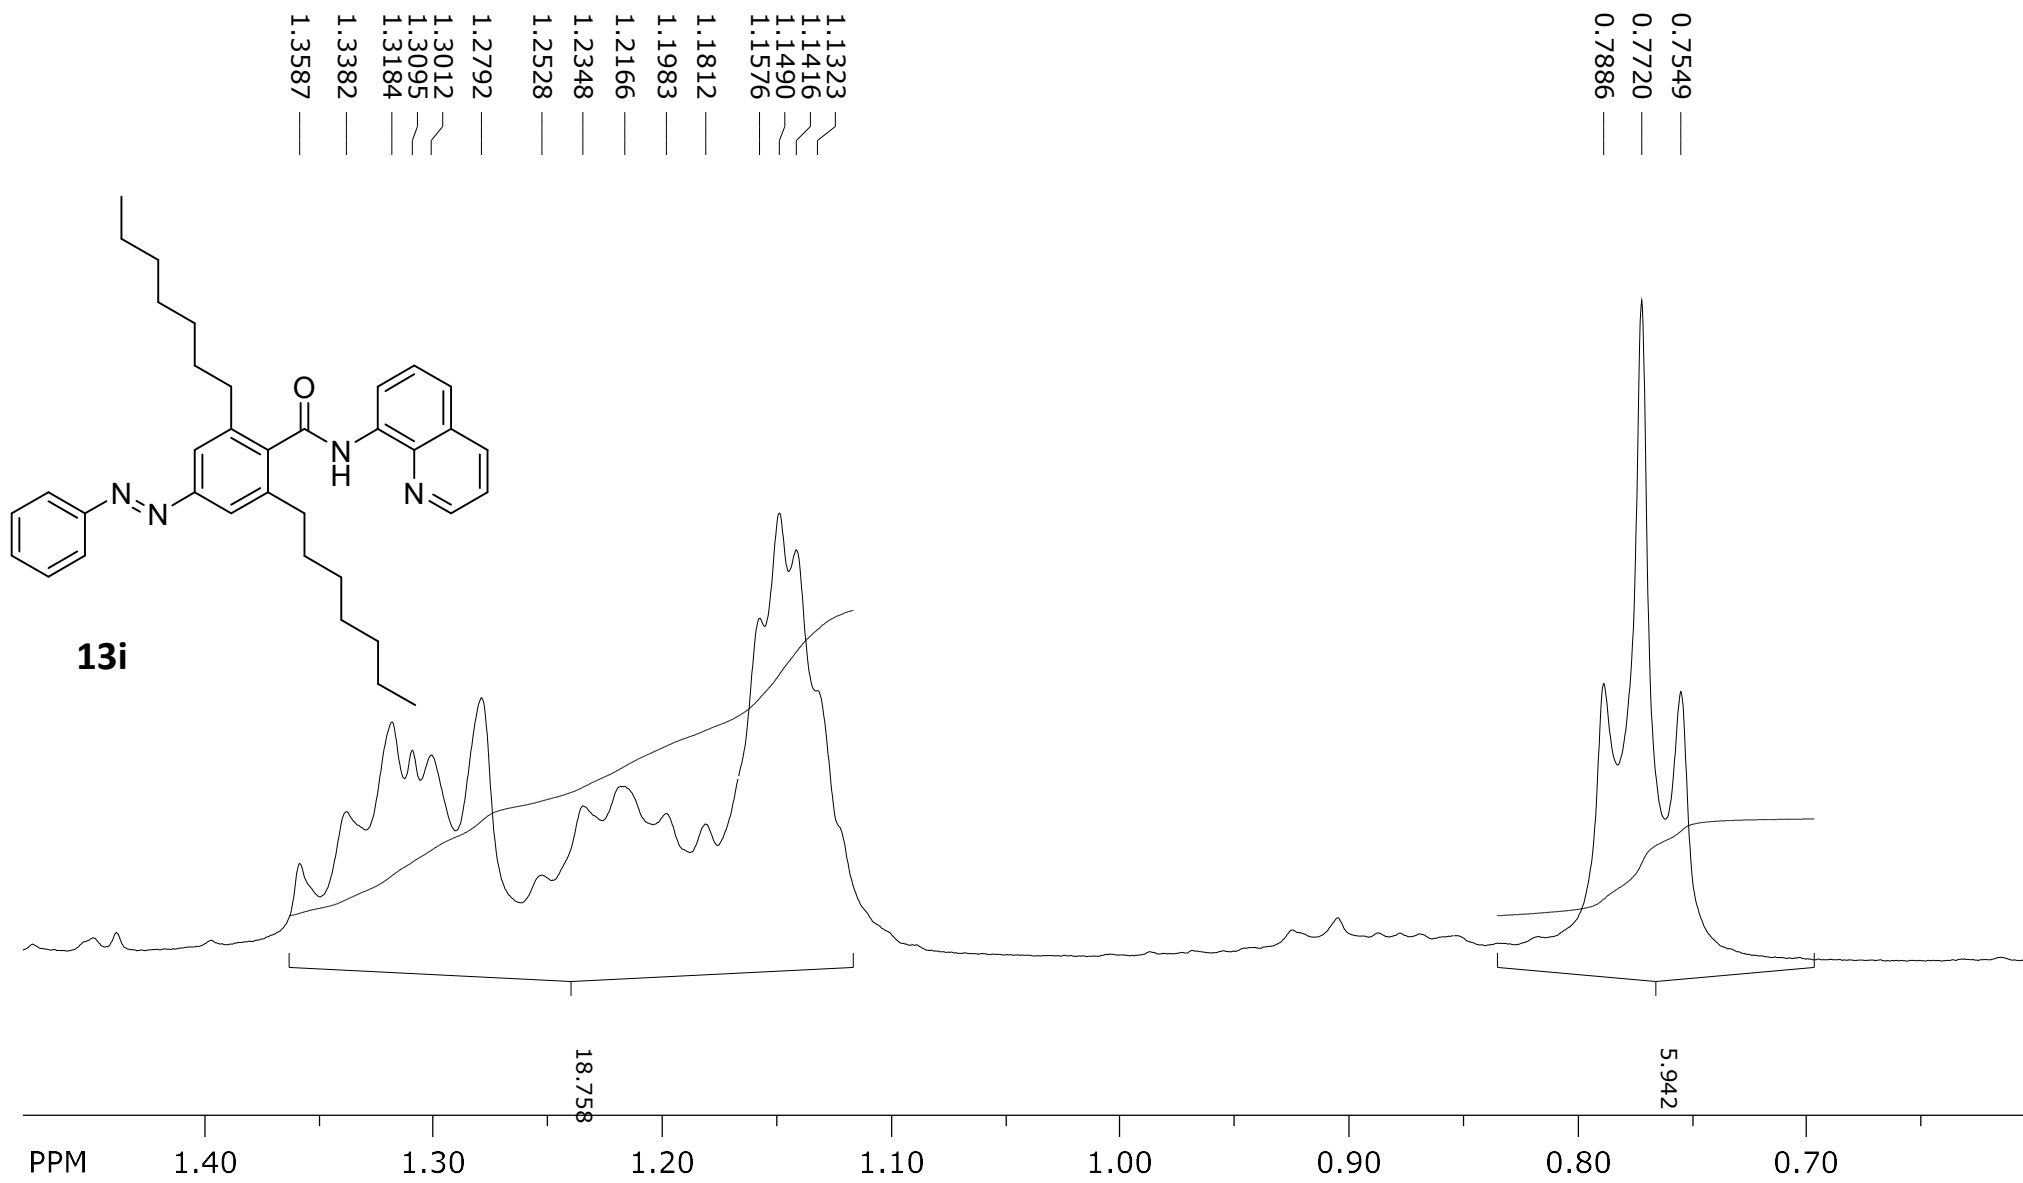

SpinWorks 4: SAB160305  
C13CPD CDCl3 {D:\Spectra} nmr 5

168.258  
152.773  
152.788  
148.333  
140.902  
139.596  
138.507  
136.334  
134.304  
131.114  
129.133  
128.051  
127.465  
122.917  
122.036  
121.714  
121.193  
116.817

76.784  
77.038  
77.291

33.549  
31.627  
31.501  
29.540  
29.020  
22.565  
14.010

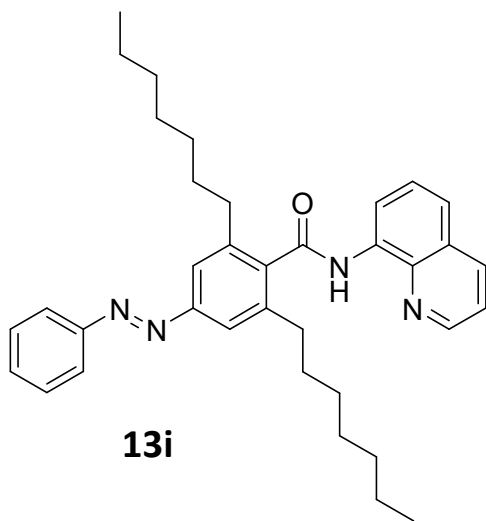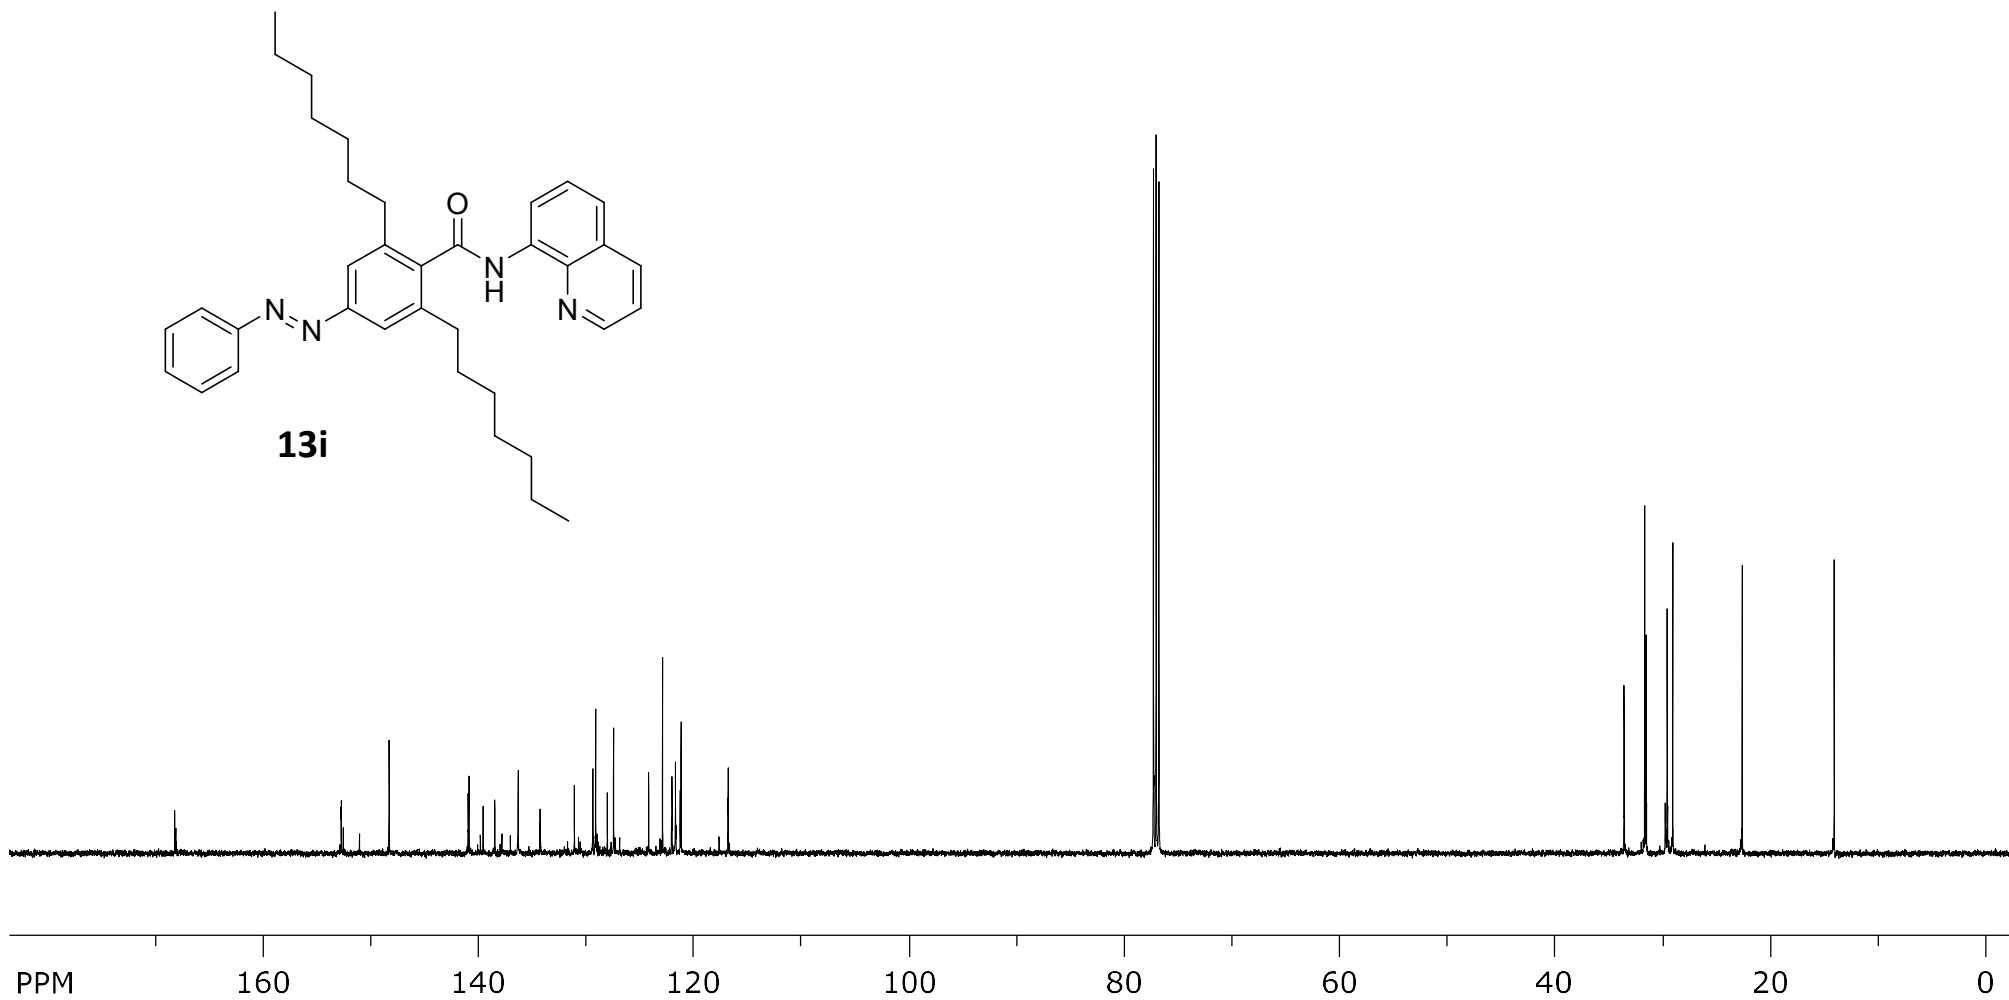

SpinWorks 4: SAB160305  
C13CPD CDCl3 {D:\Spectra} nmr 5

152.773  
152.788  
148.333  
140.902  
139.596  
138.507  
136.334  
134.304  
131.114  
129.133  
128.051  
127.465  
122.917  
122.036  
121.714  
121.193  
116.817

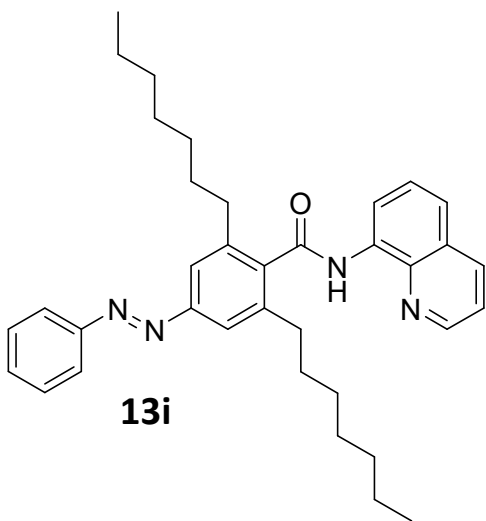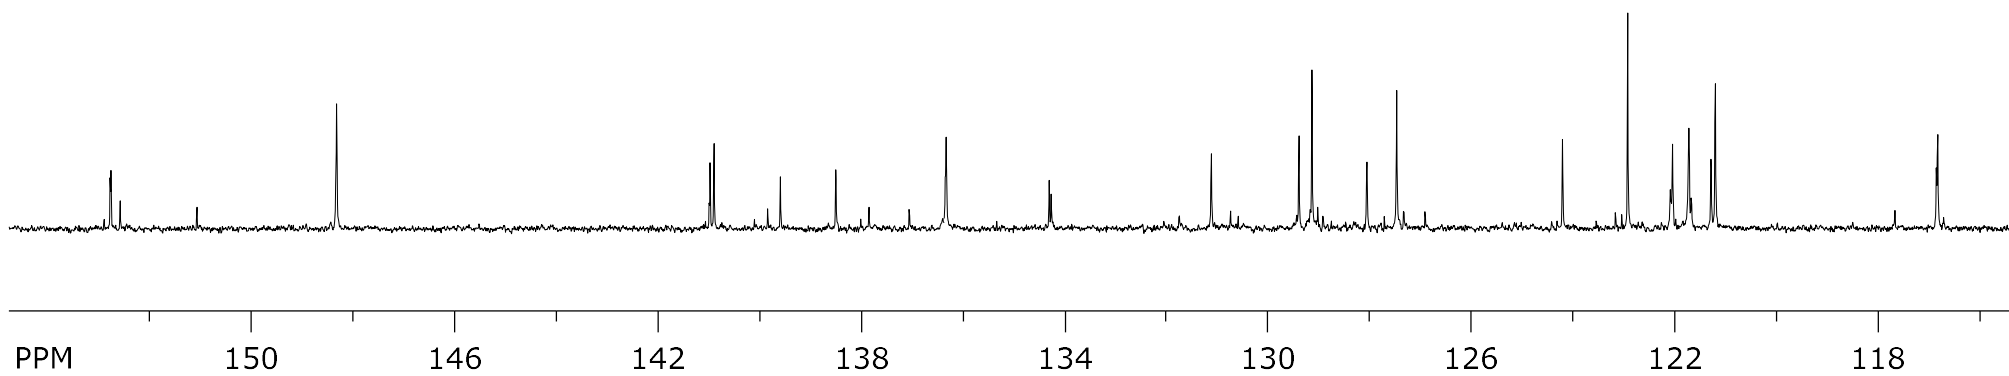

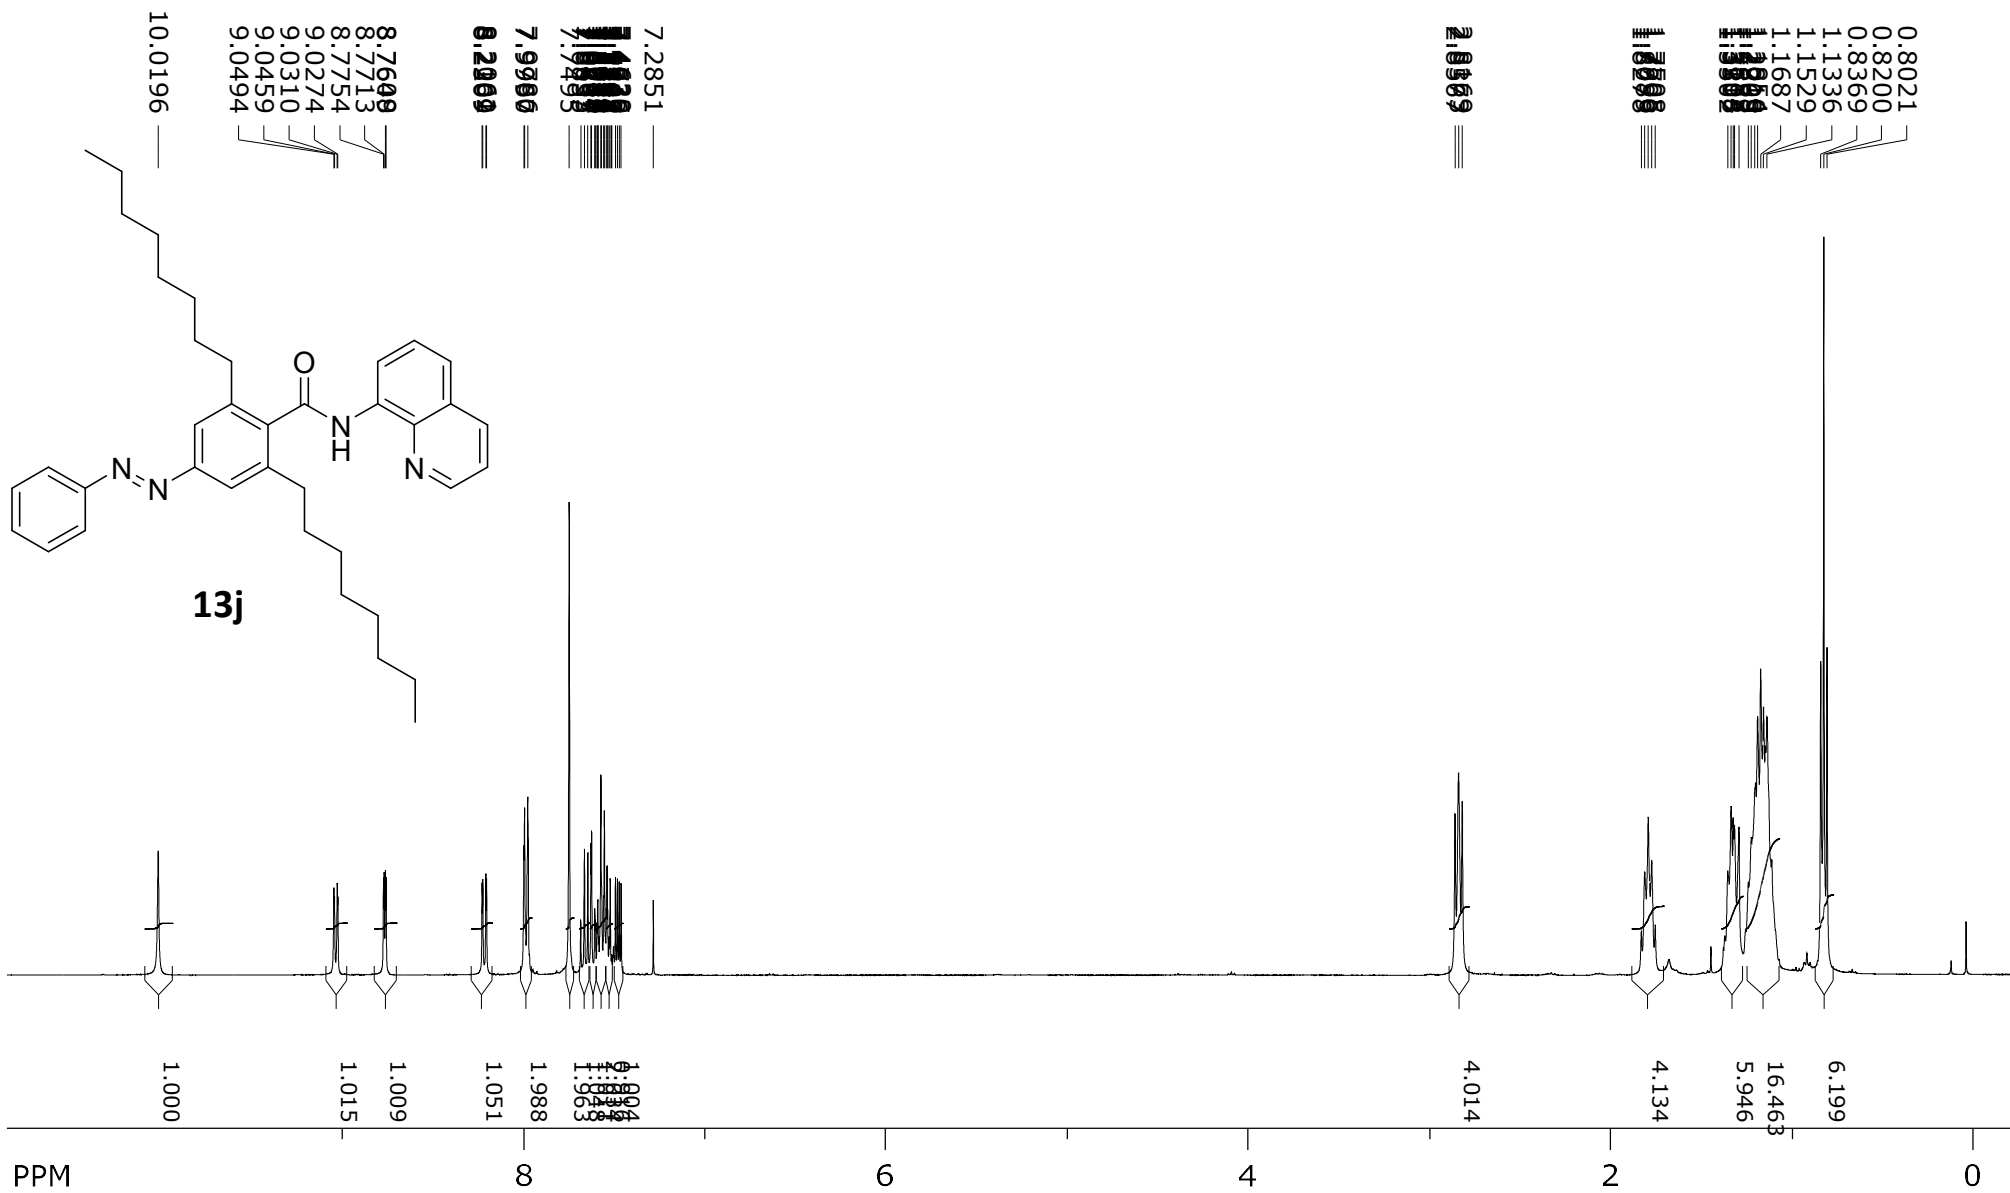

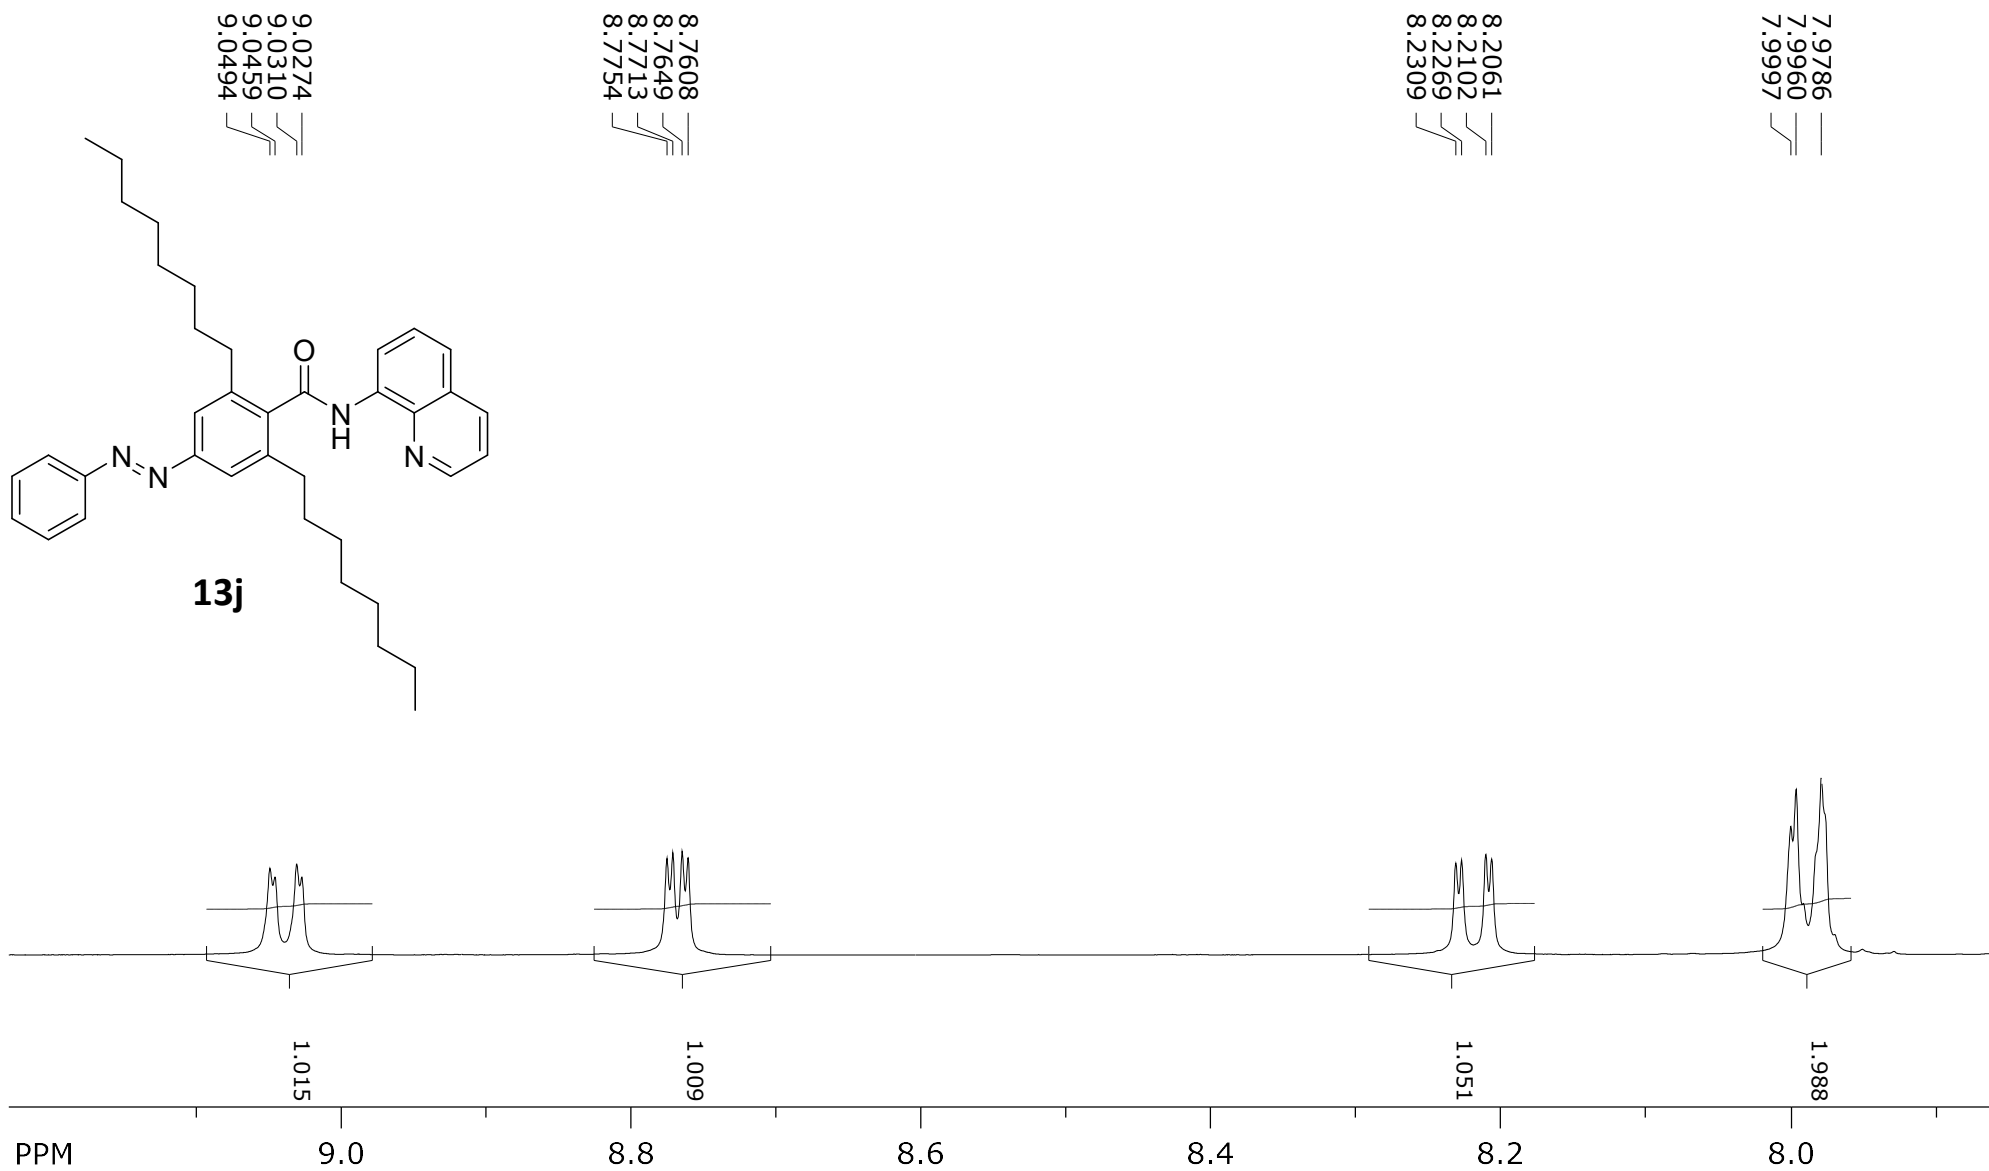



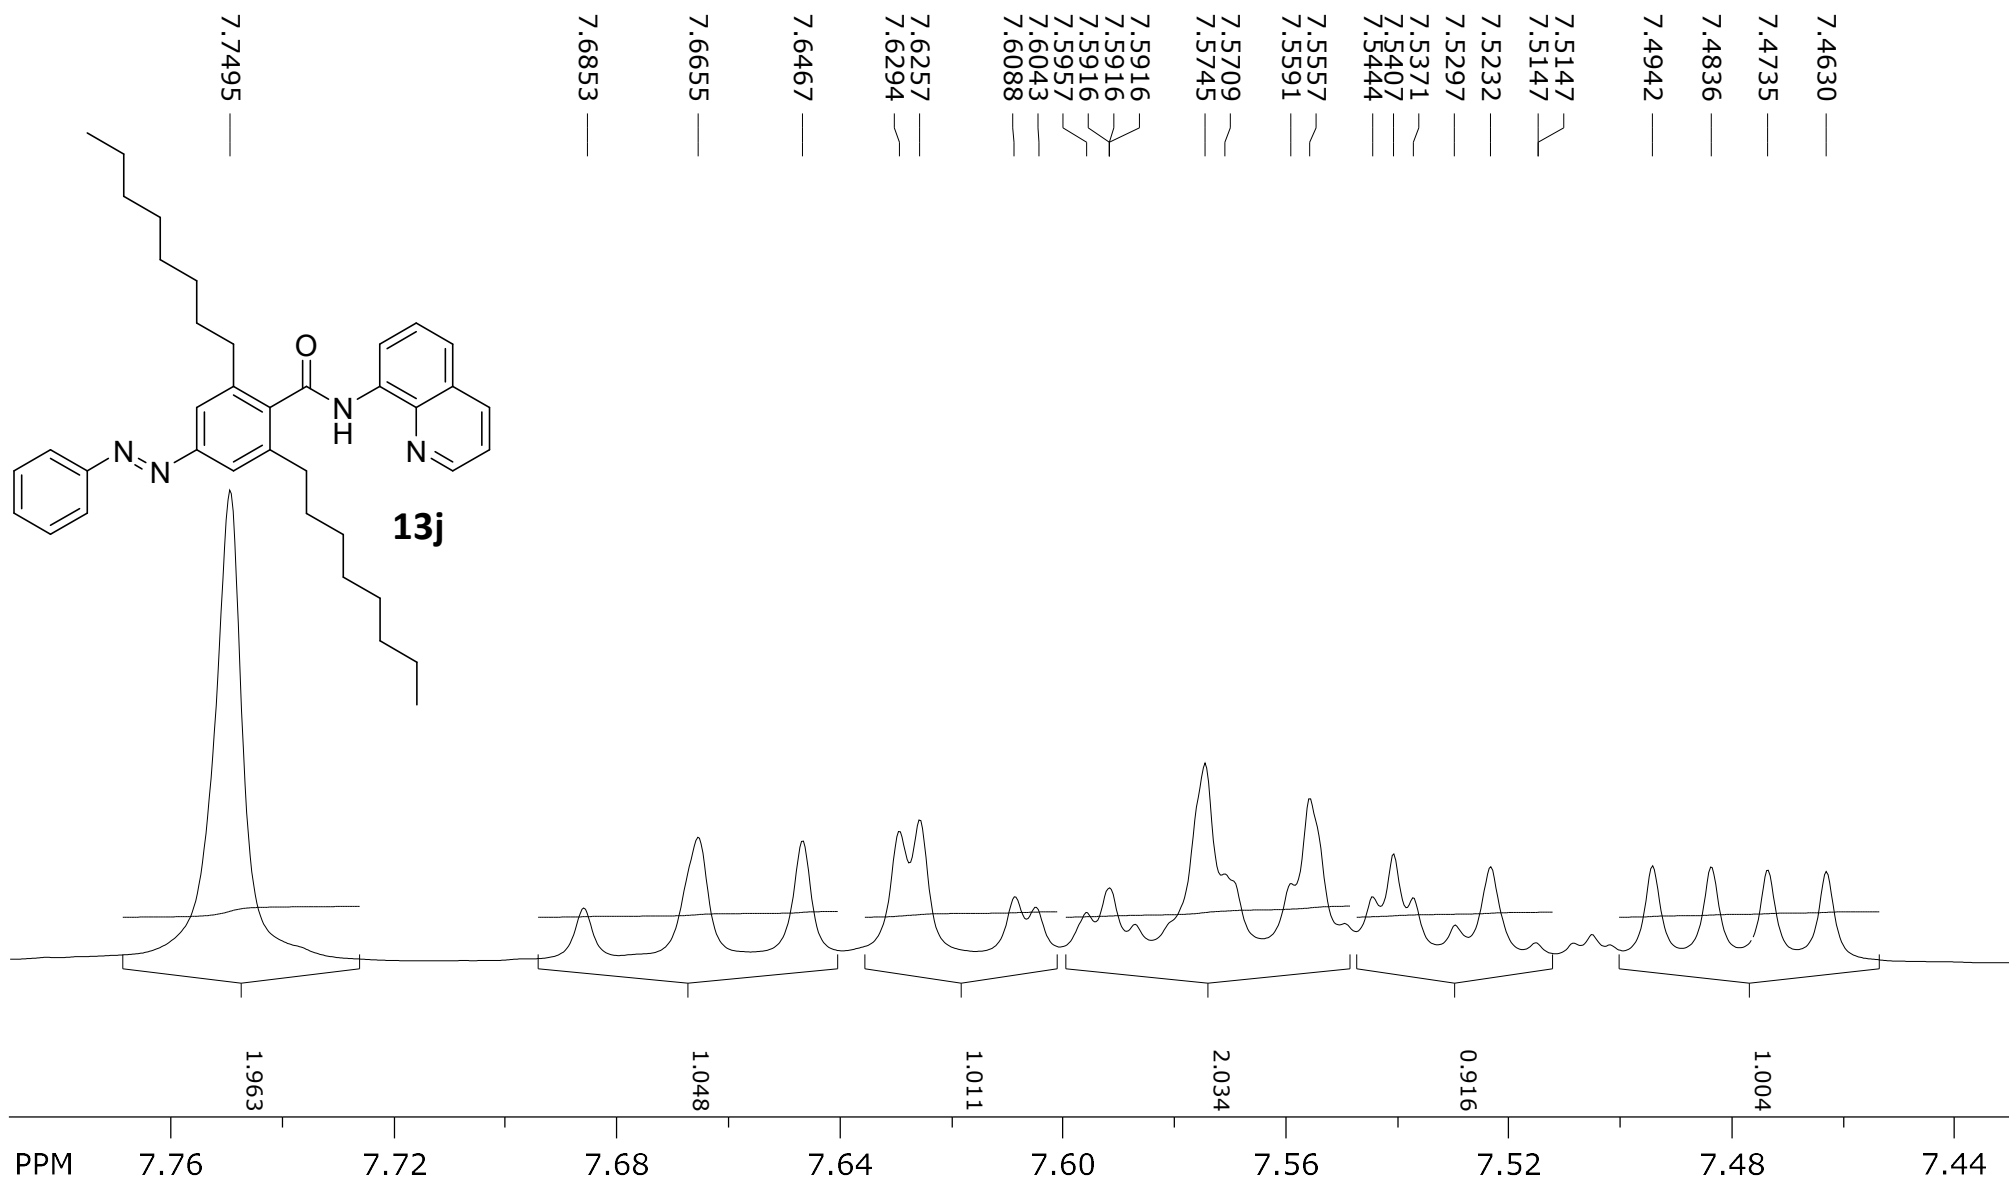

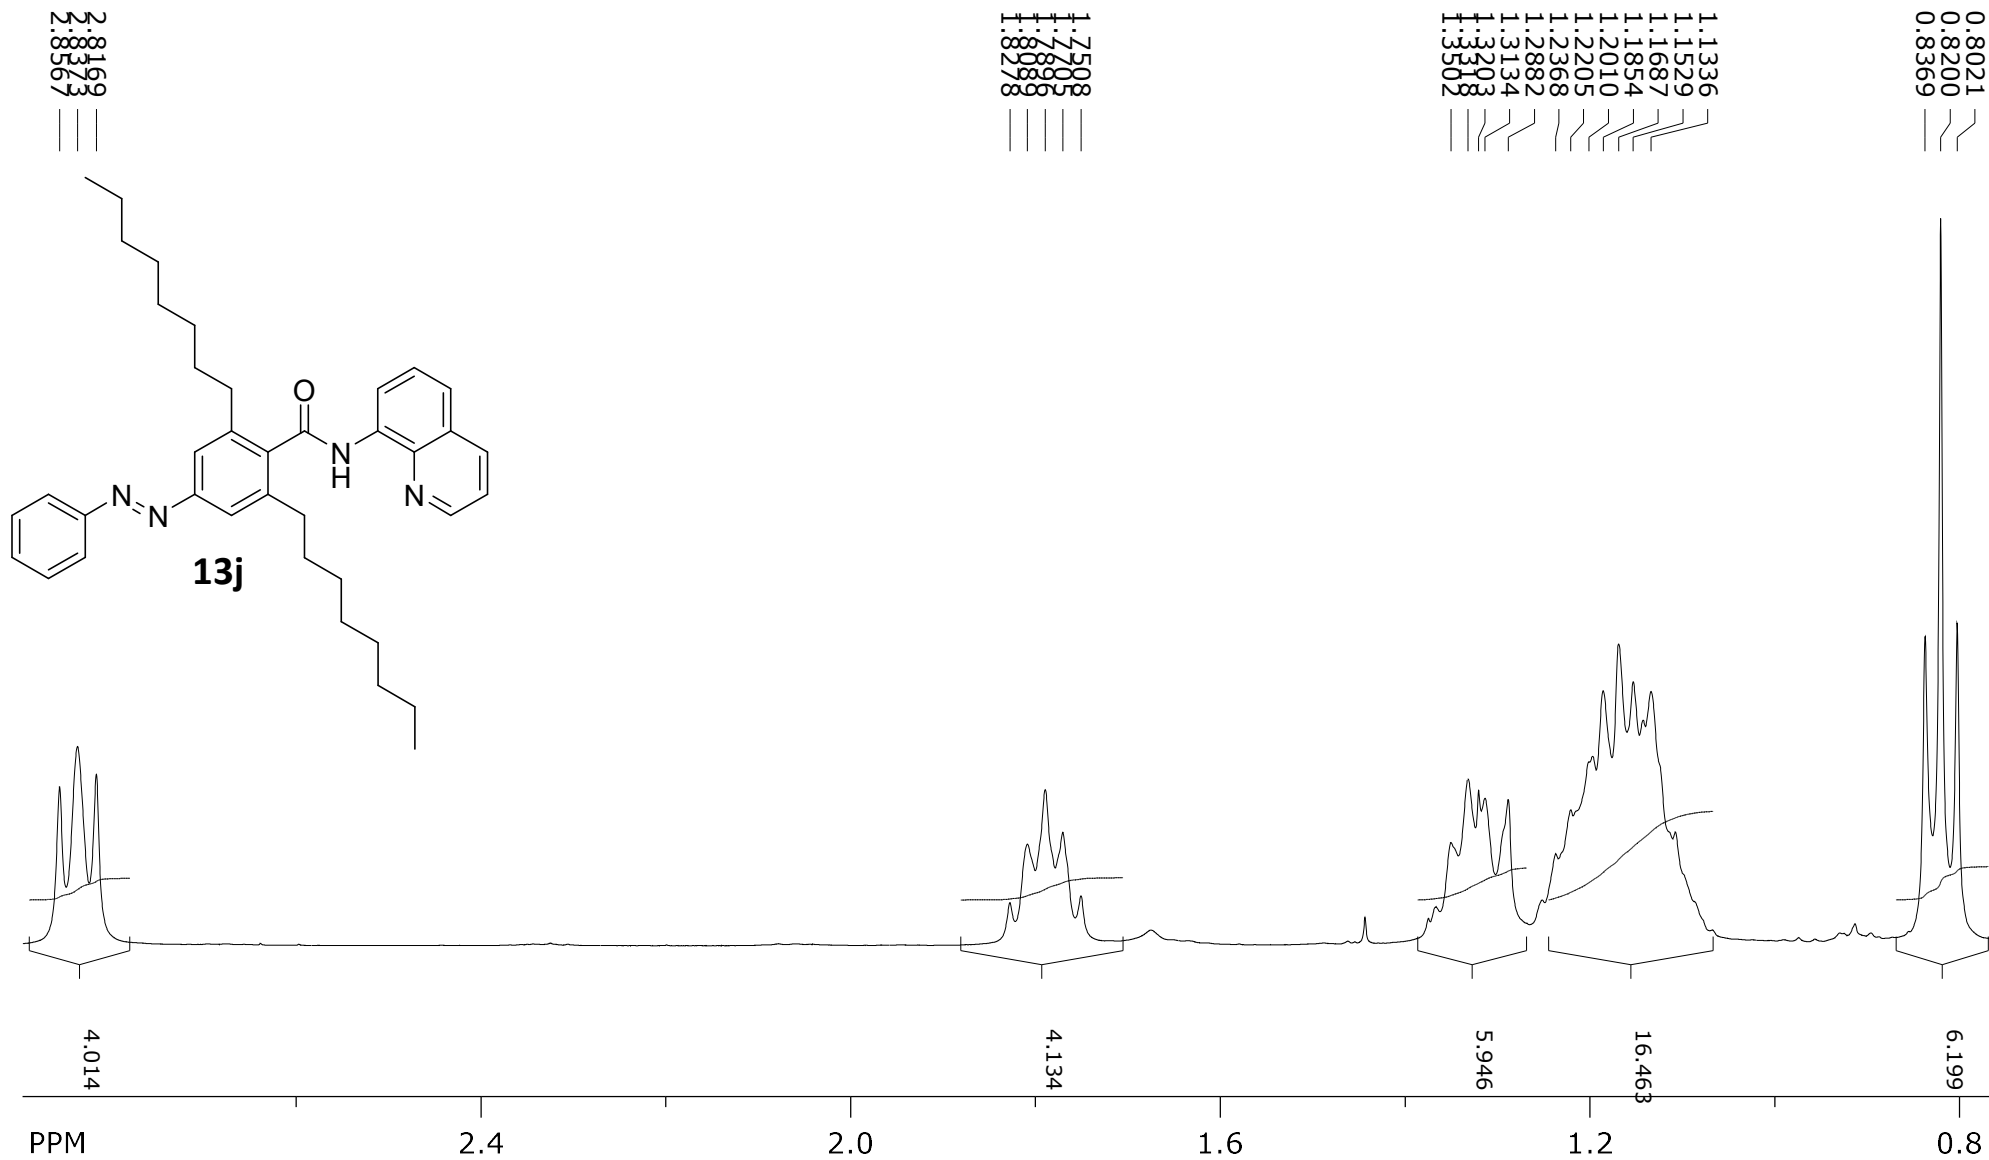

SpinWorks 4: rp 1401 a2  
C13CPD CDCl3 /opt/topspin3.5pl2/nmrdata nmrsu 55

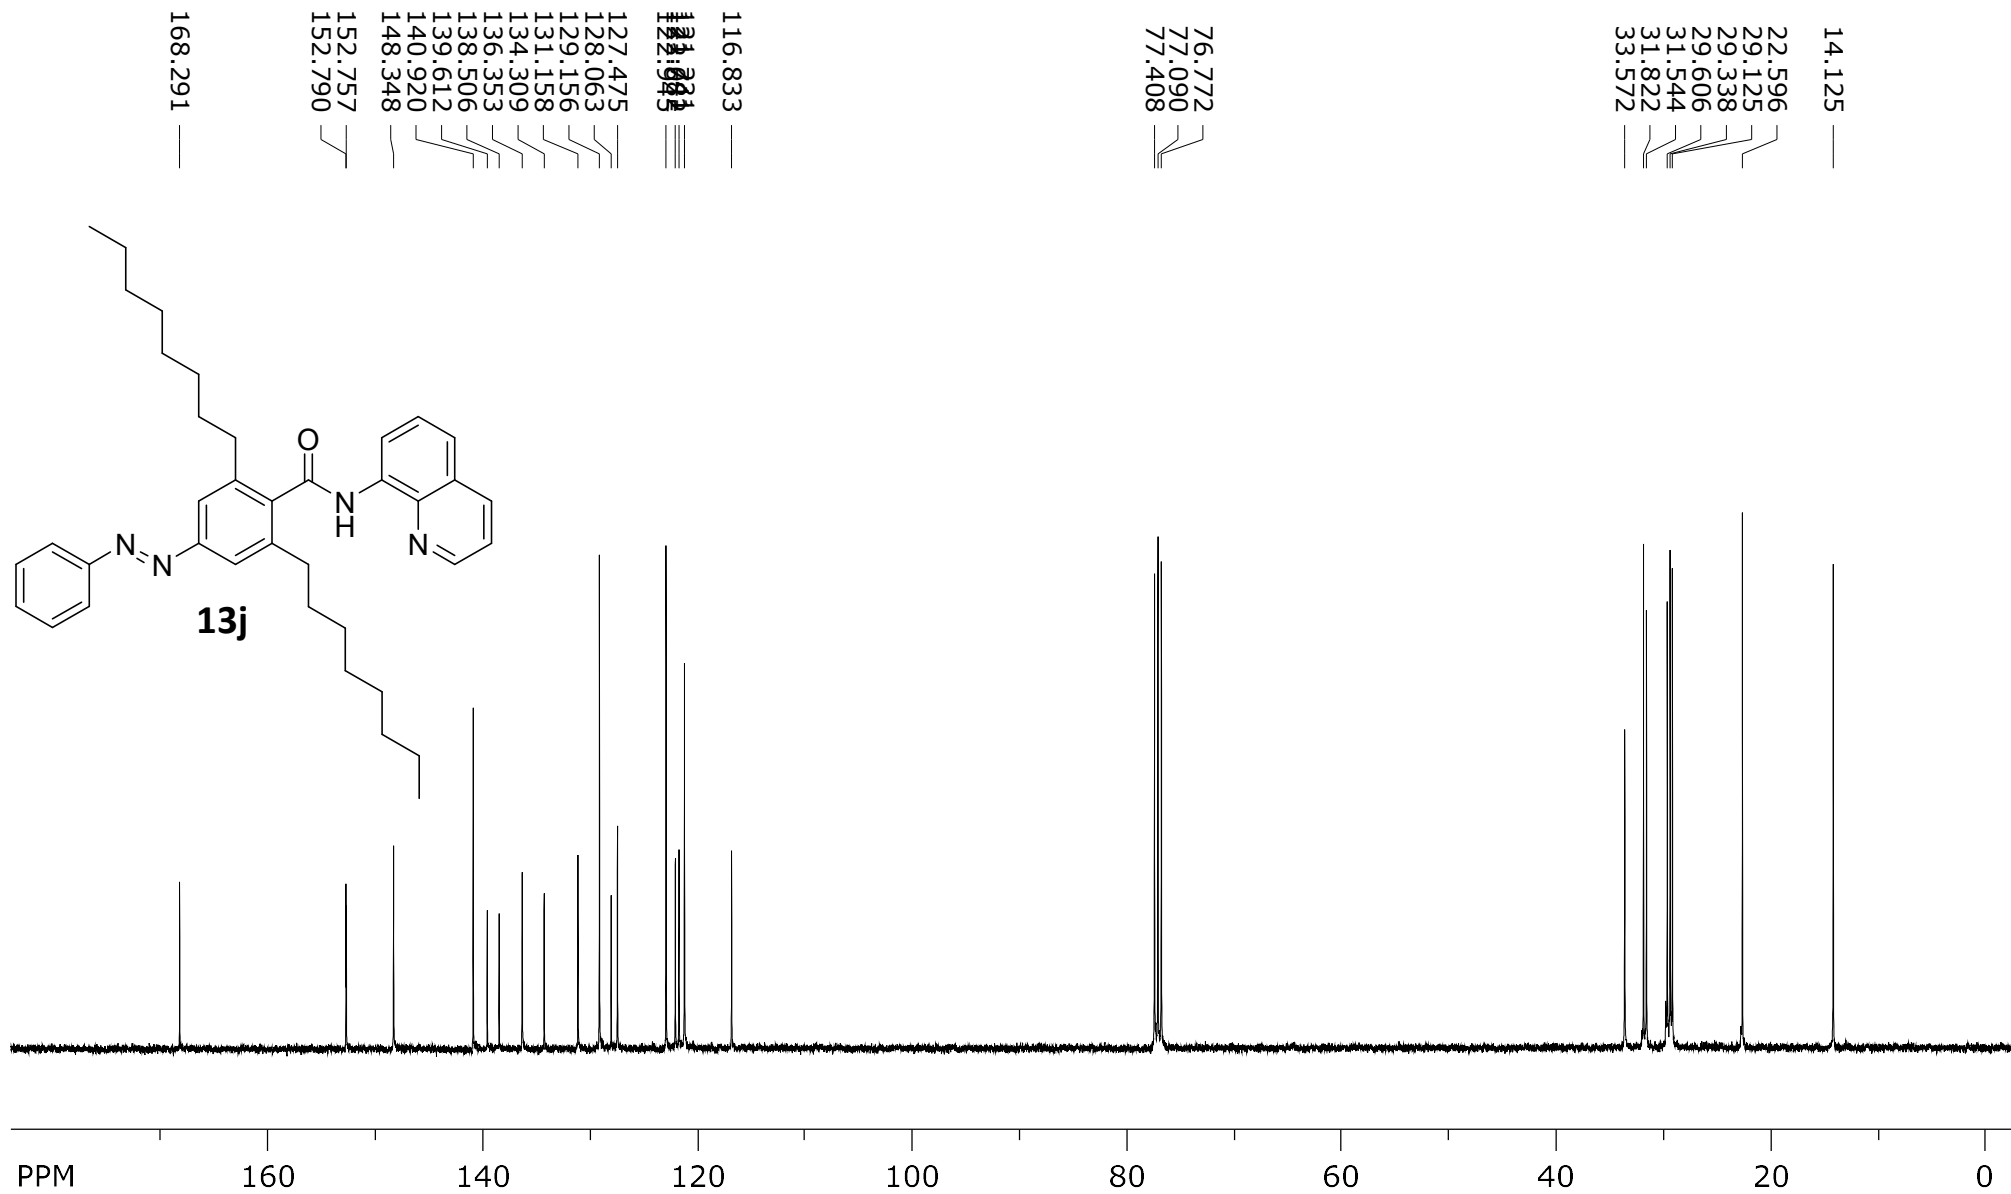

SpinWorks 4: rp 1401 a2  
C13CPD CDCl3 /opt/topspin3.5pl2/nmrdata nmrsu 55

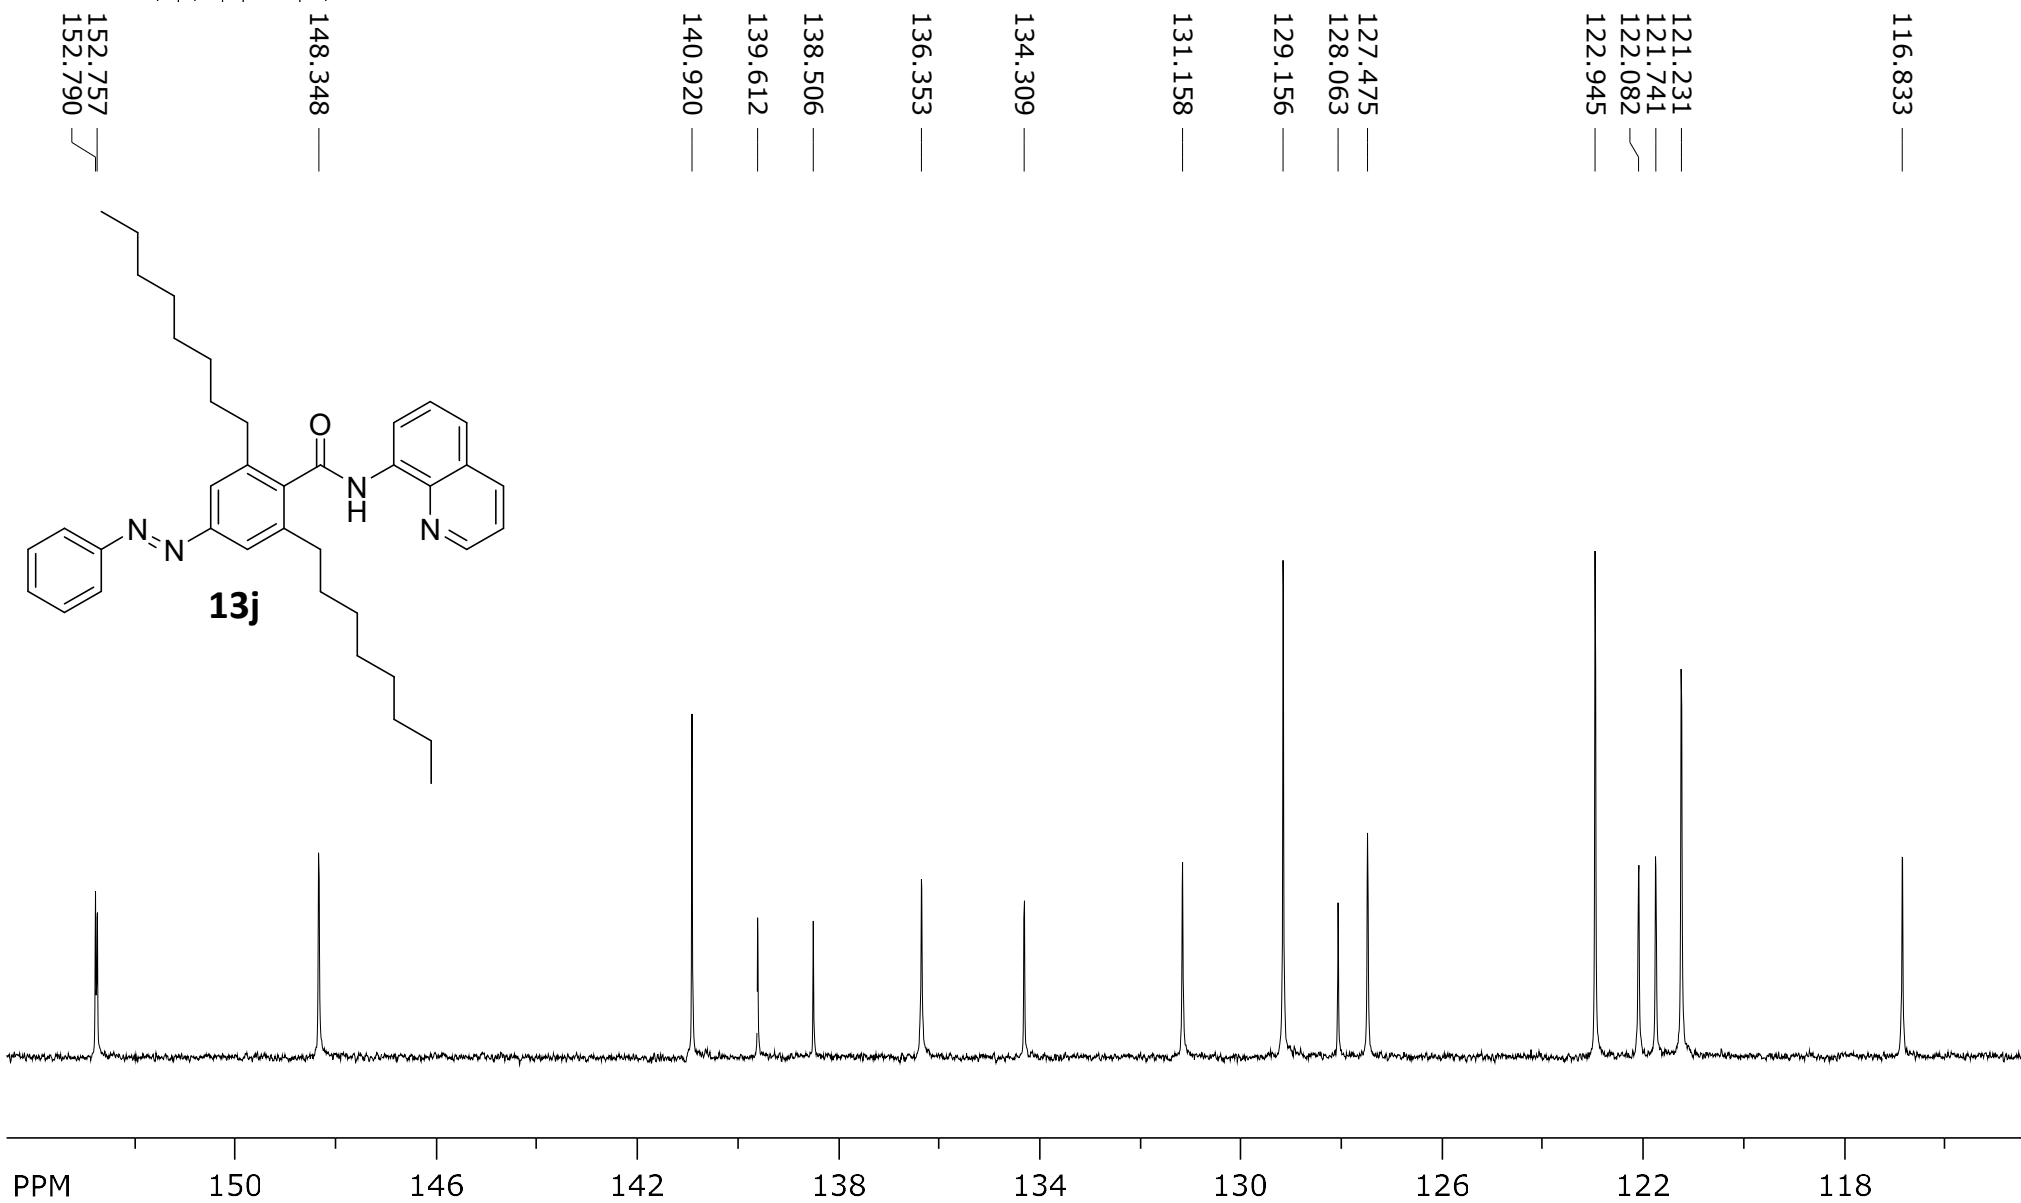

SpinWorks 4: rp 1401 a2  
C13CPD CDCl3 /opt/topspin3.5pl2/nmrdata nmrsu 55

33.572

31.544  
31.822

29.125  
29.338  
29.606

22.596

14.125

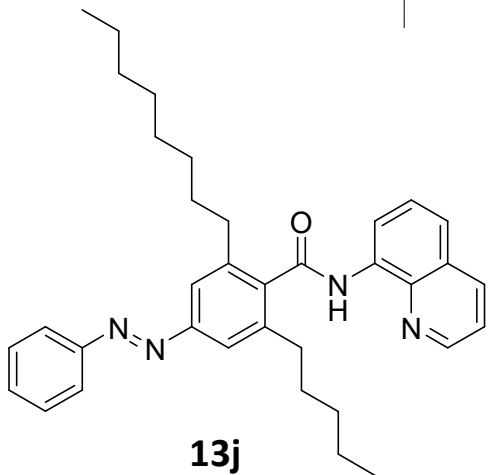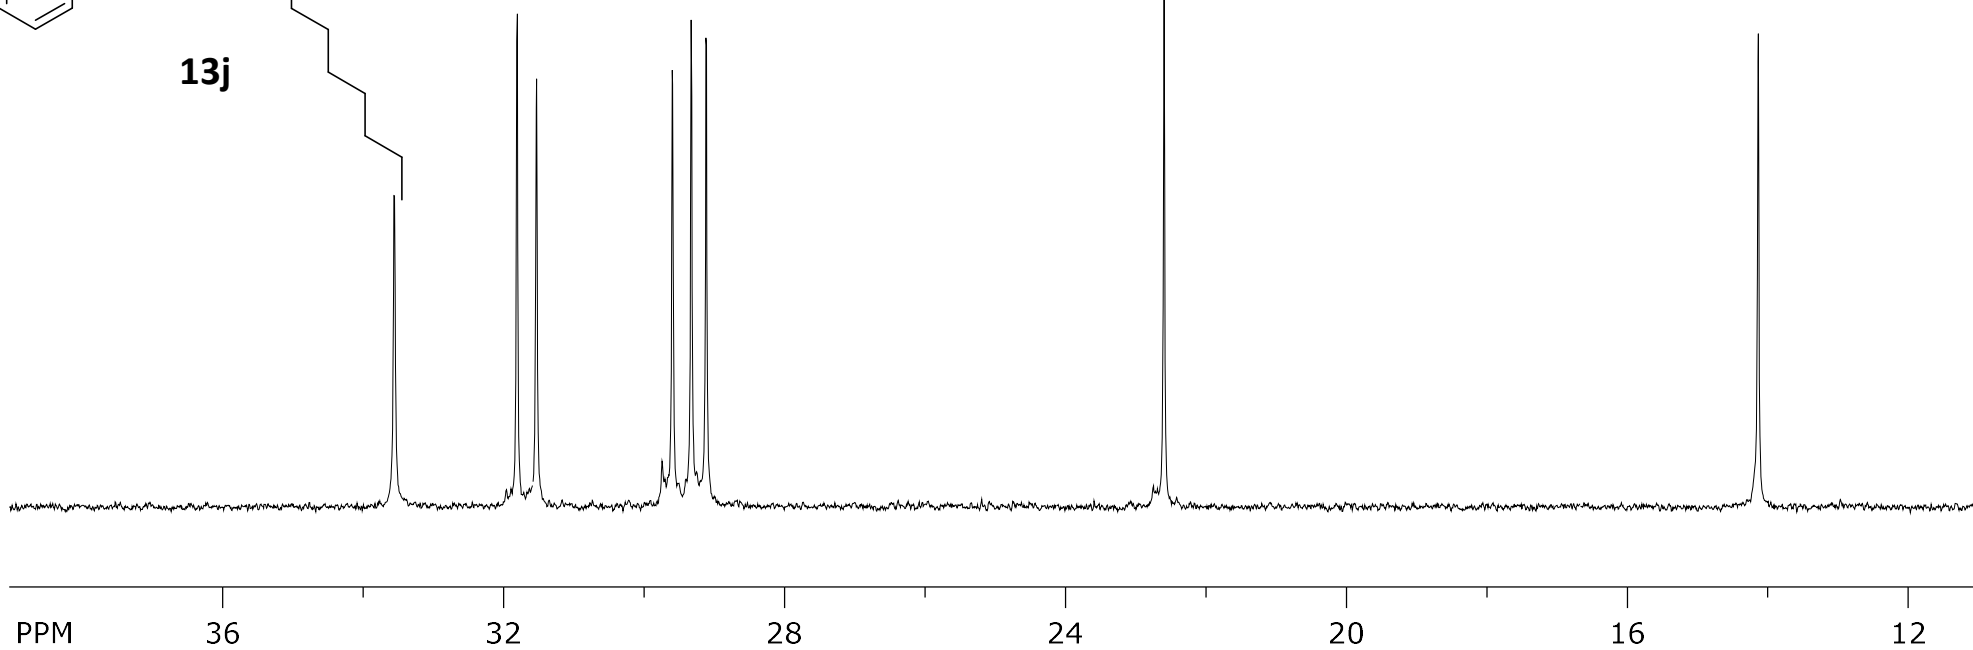

SpinWorks 4: SAB030703  
1H\_8scan CDCl3 {D:\Spectra} nmr 33

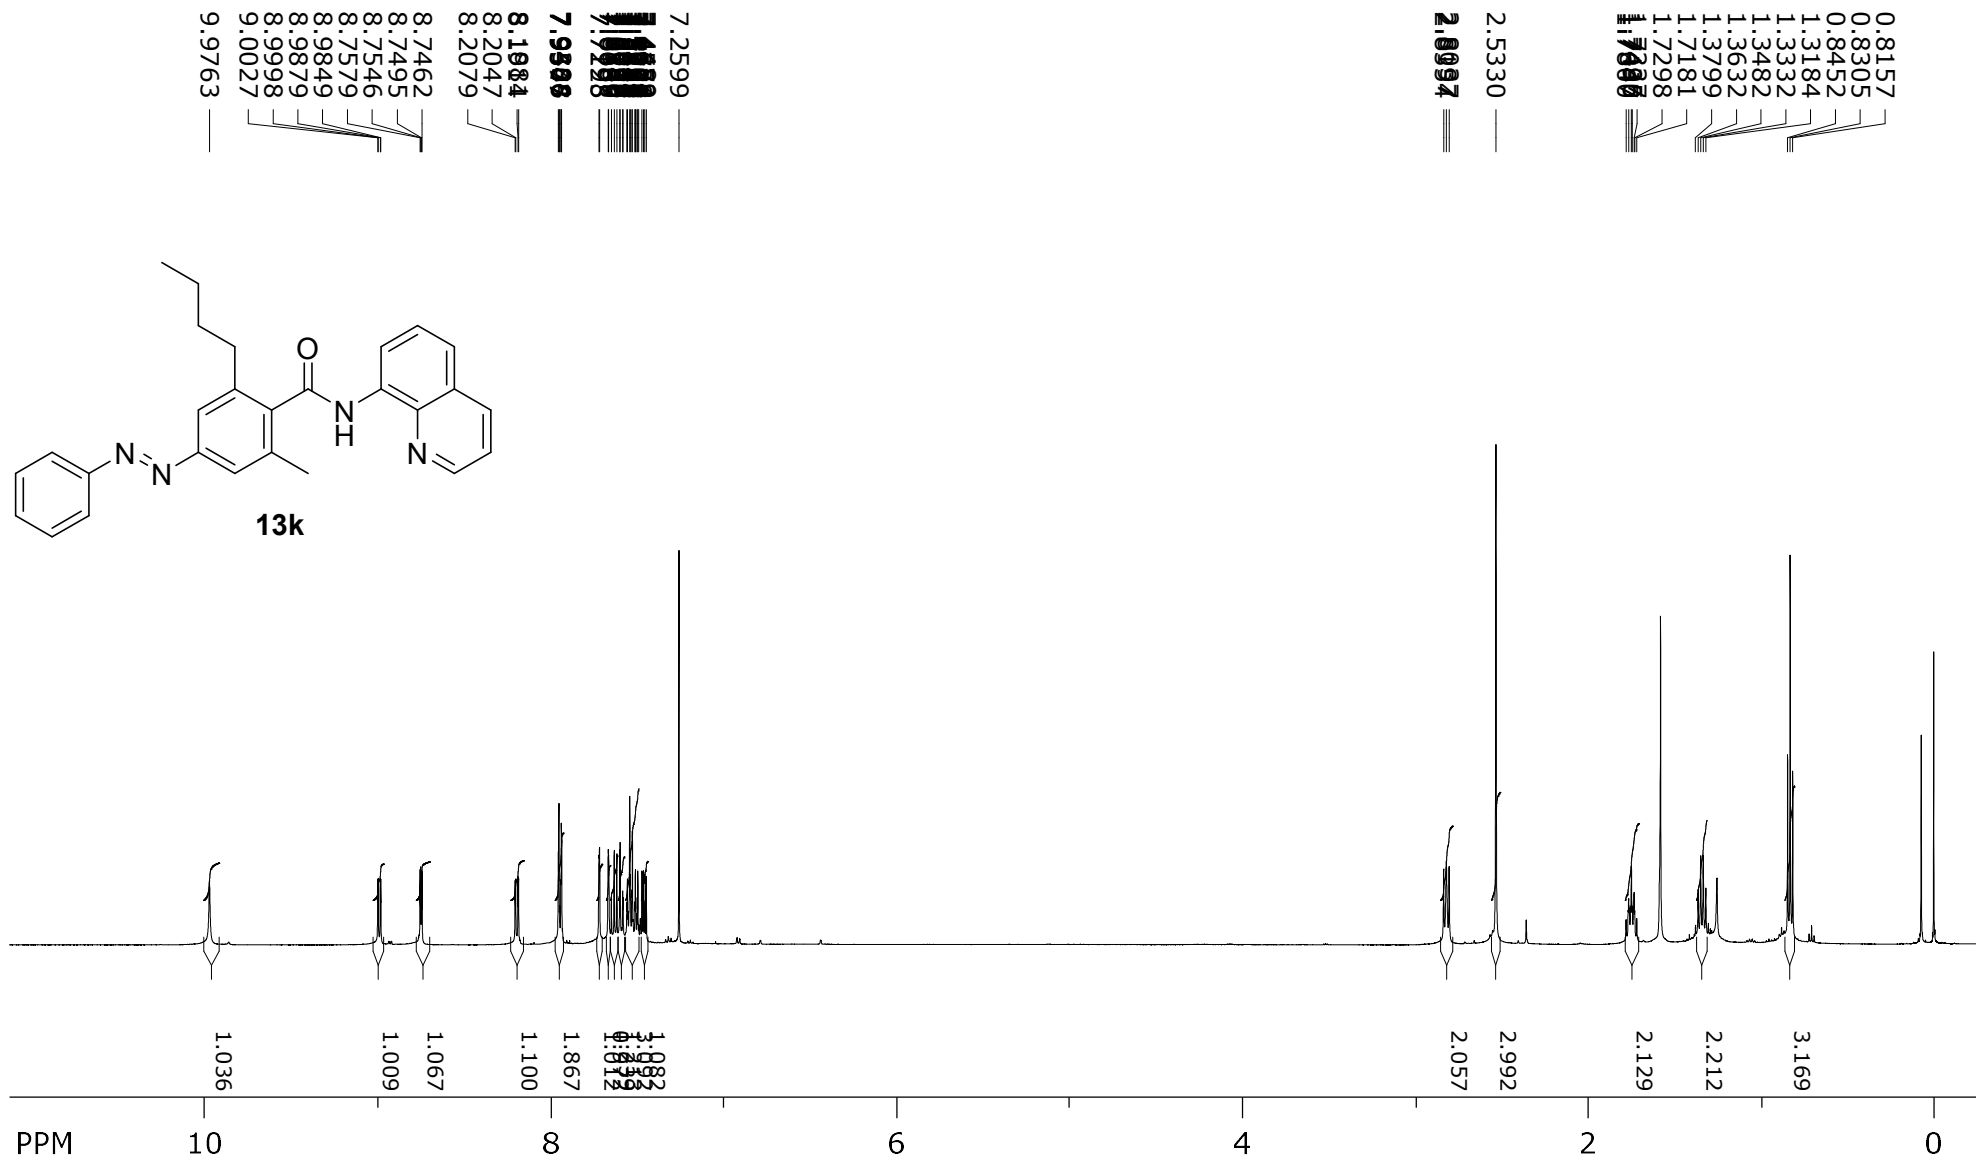

SpinWorks 4: SAB030703  
1H\_8scan CDCl3 {D:\Spectra} nmr 33

8.9849  
8.9879  
8.9998  
9.0027

8.7462  
8.7495  
8.7546  
8.7579

8.1881  
8.1914  
8.2047  
8.2079

7.9384  
7.9408  
7.9438  
7.9506  
7.9547  
7.9577

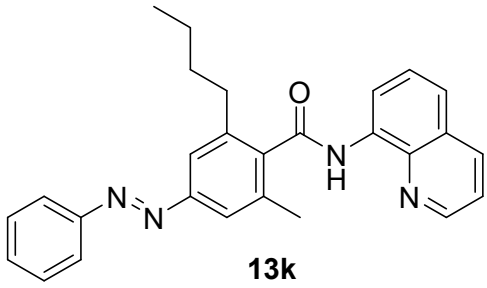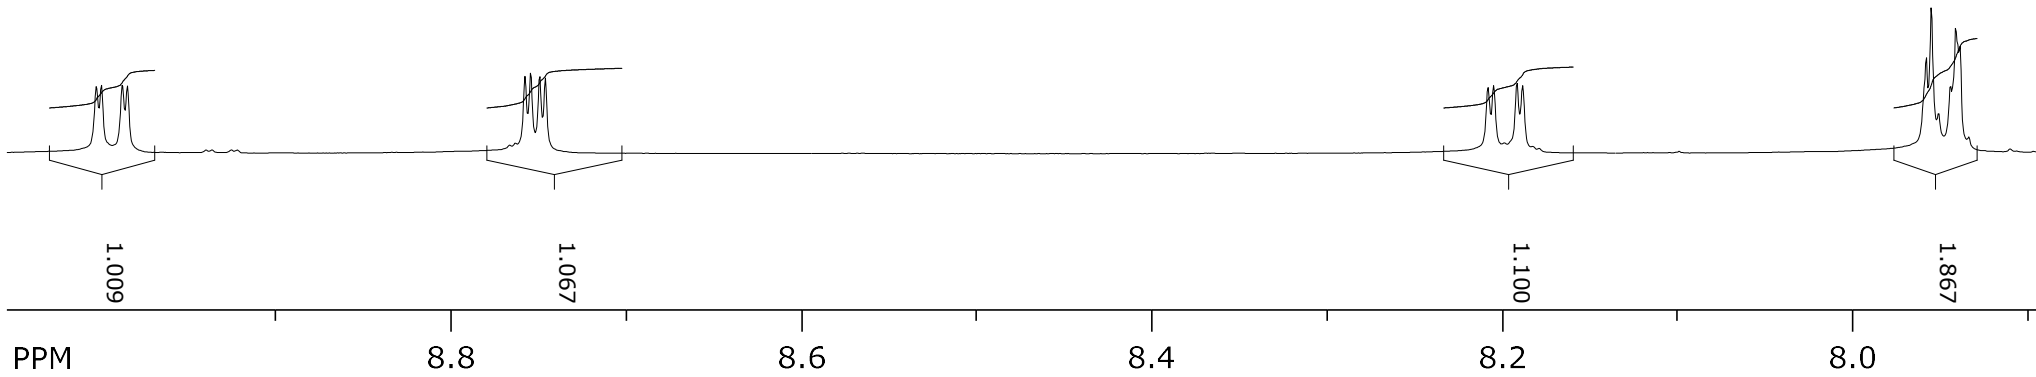

SpinWorks 4: SAB030703  
1H\_8scan CDCl3 {D:\Spectra} nmr 33

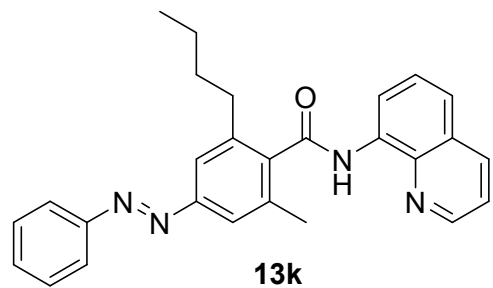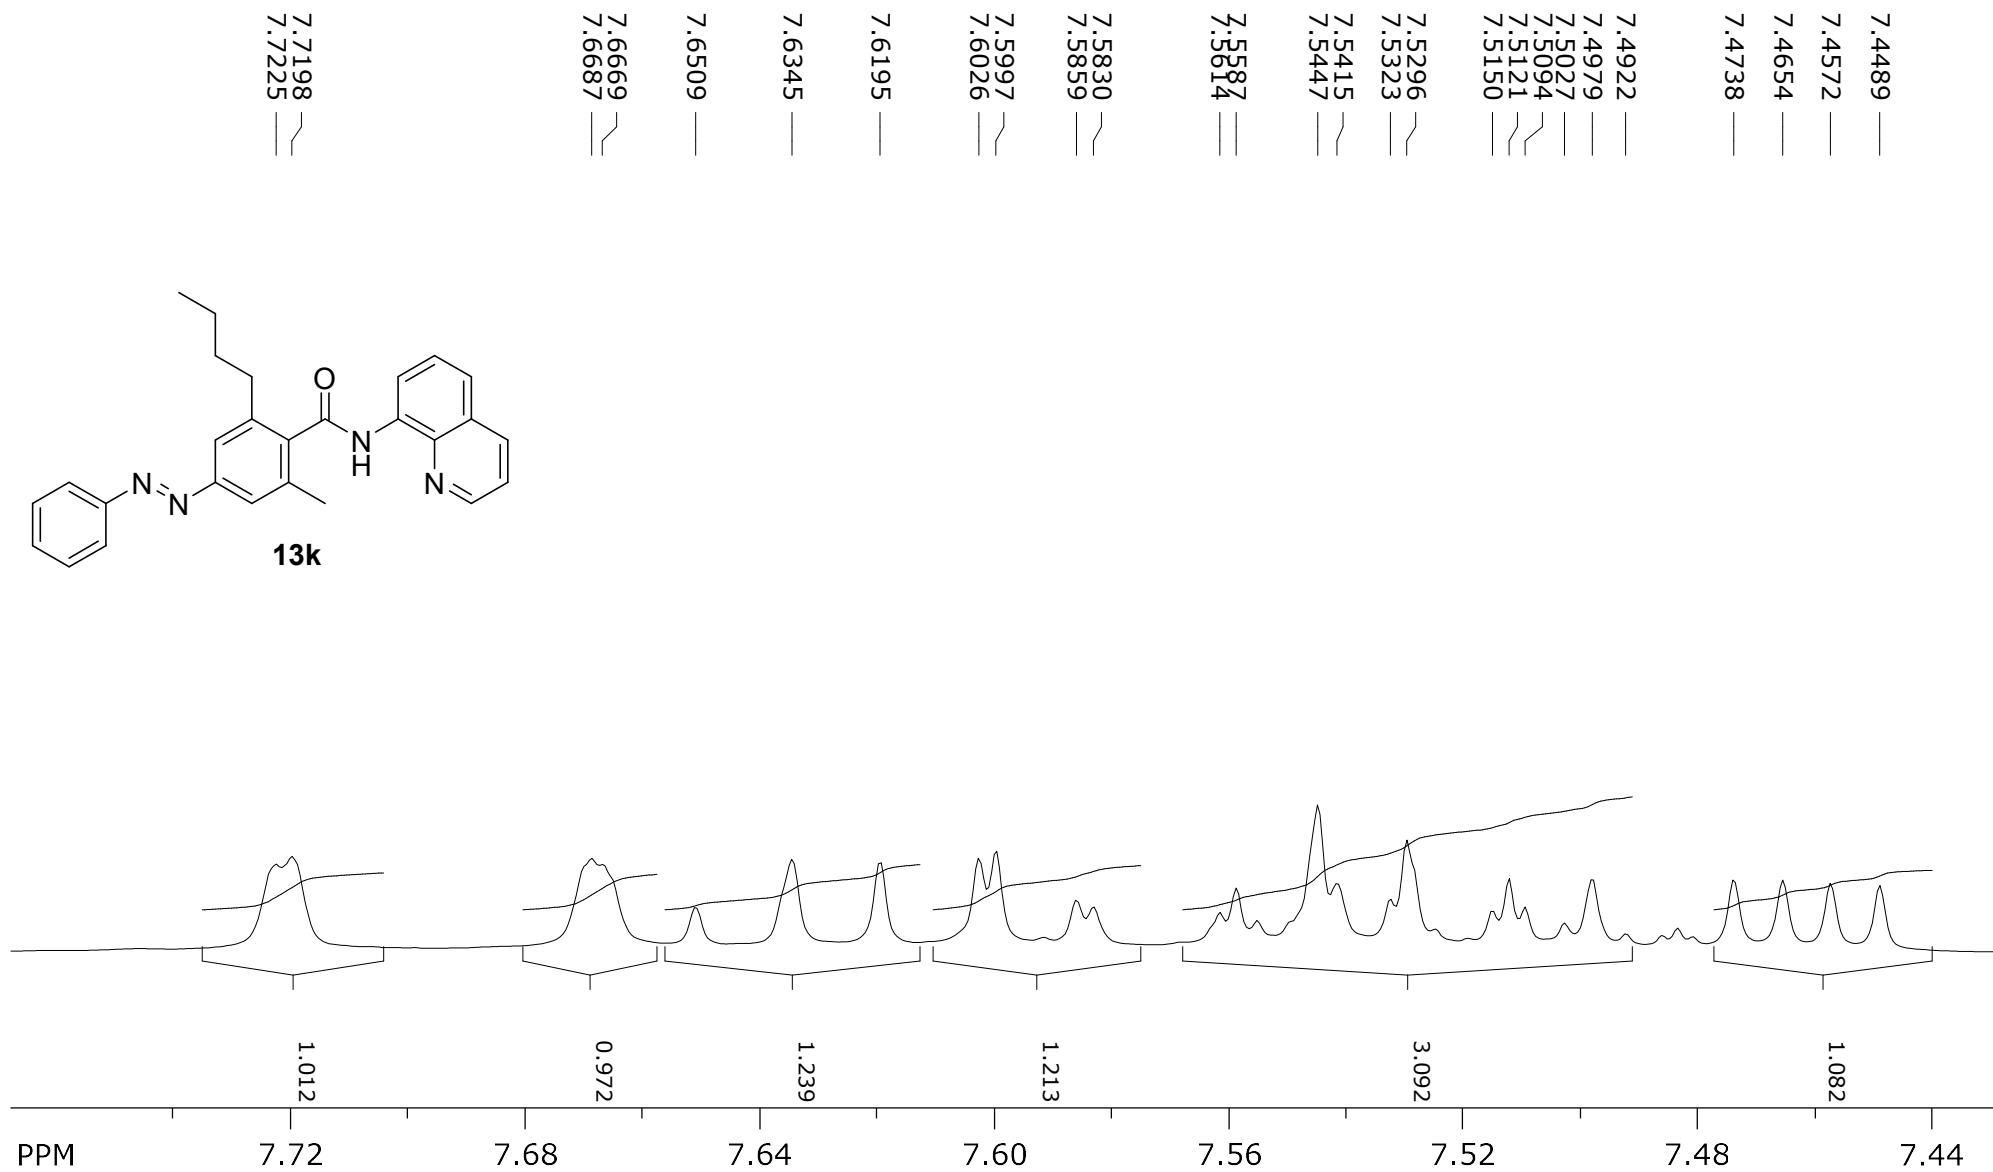



SpinWorks 4: SAB030703  
1H\_8scan CDCl3 {D:\Spectra} nmr 33

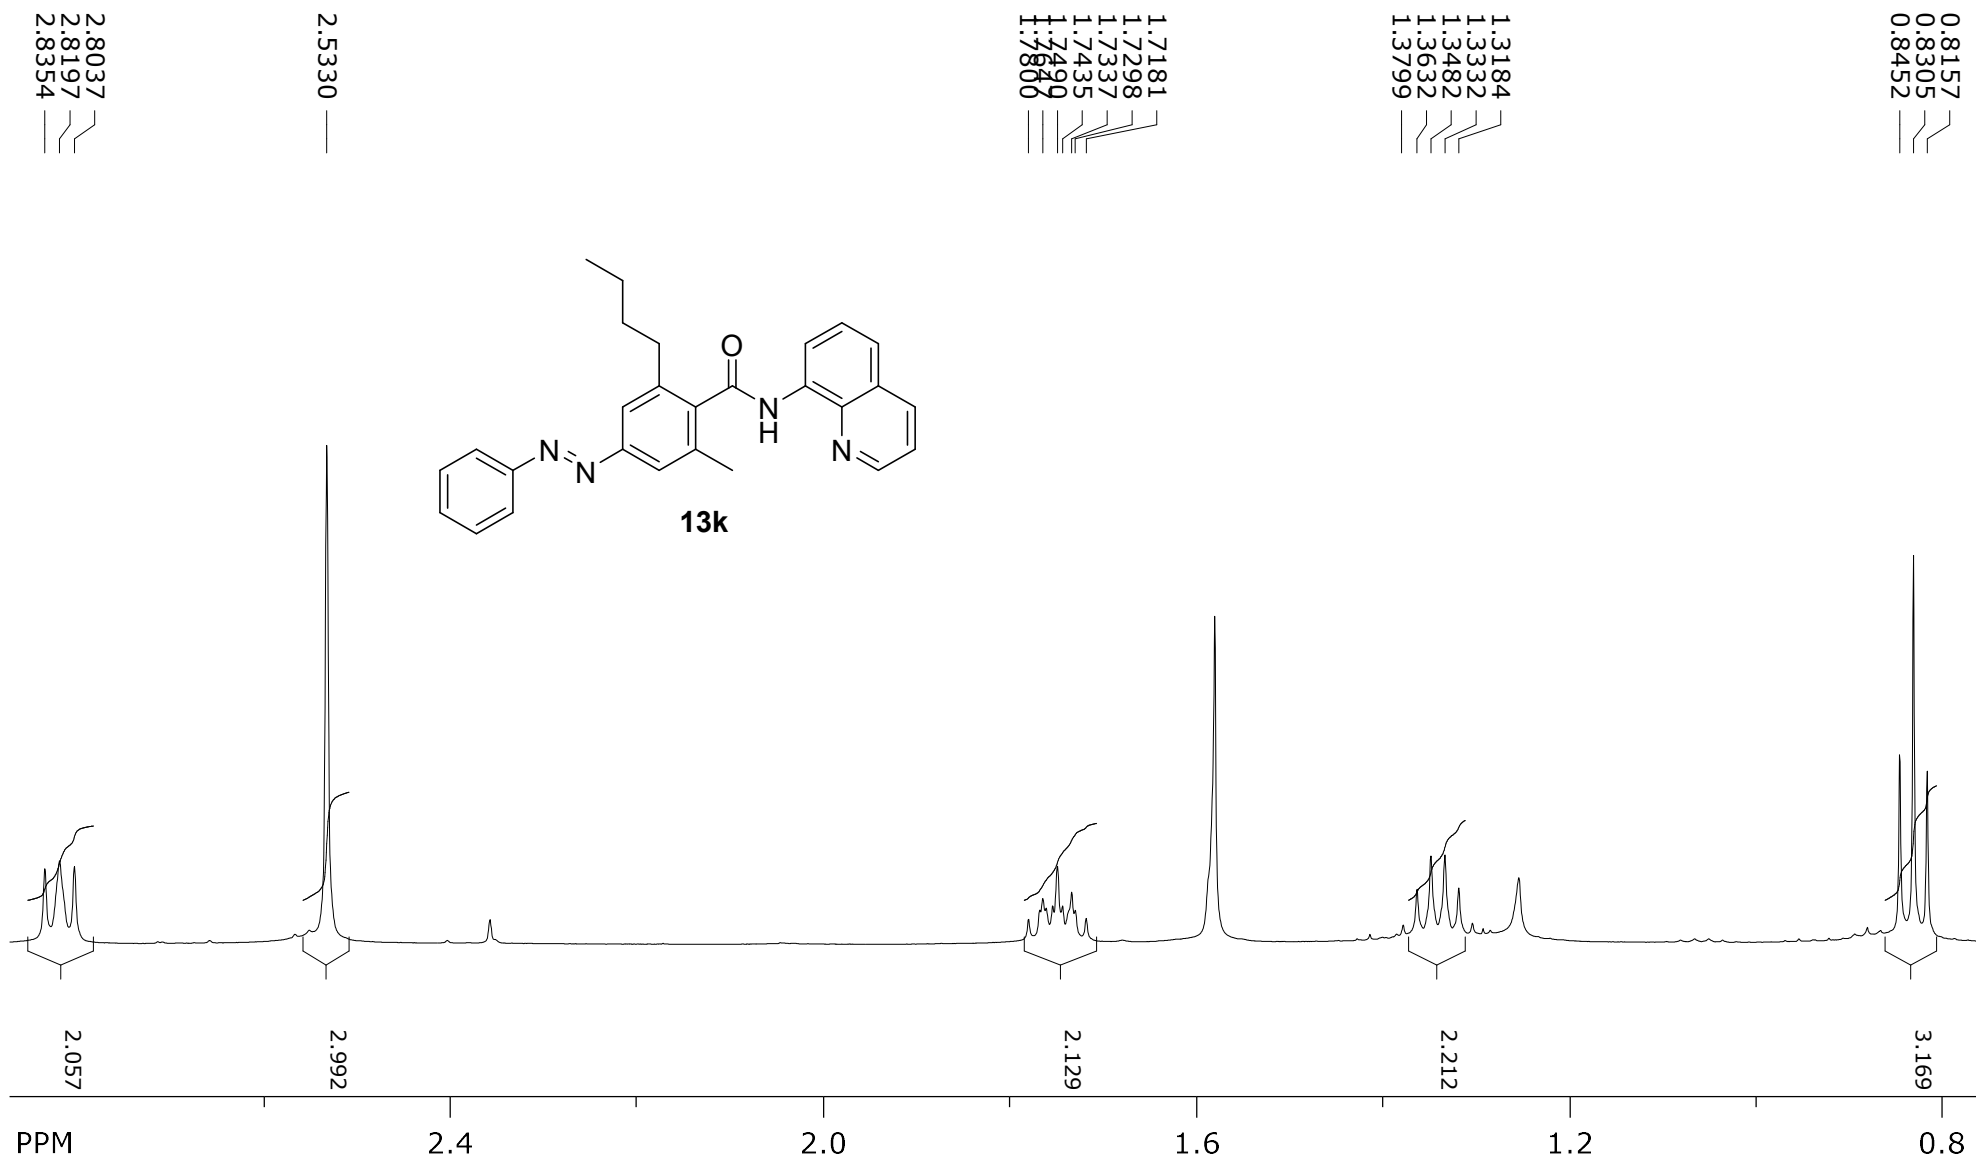

SpinWorks 4: rp 1525  
C13CPD CDCl3 /opt/topspin3.5pl2/nmrdata nmrsu 47

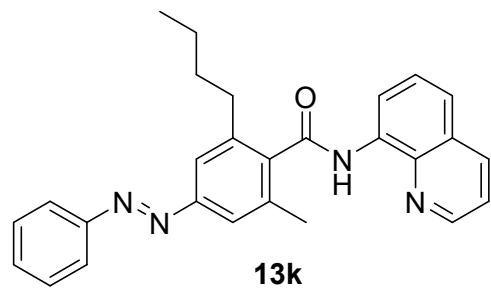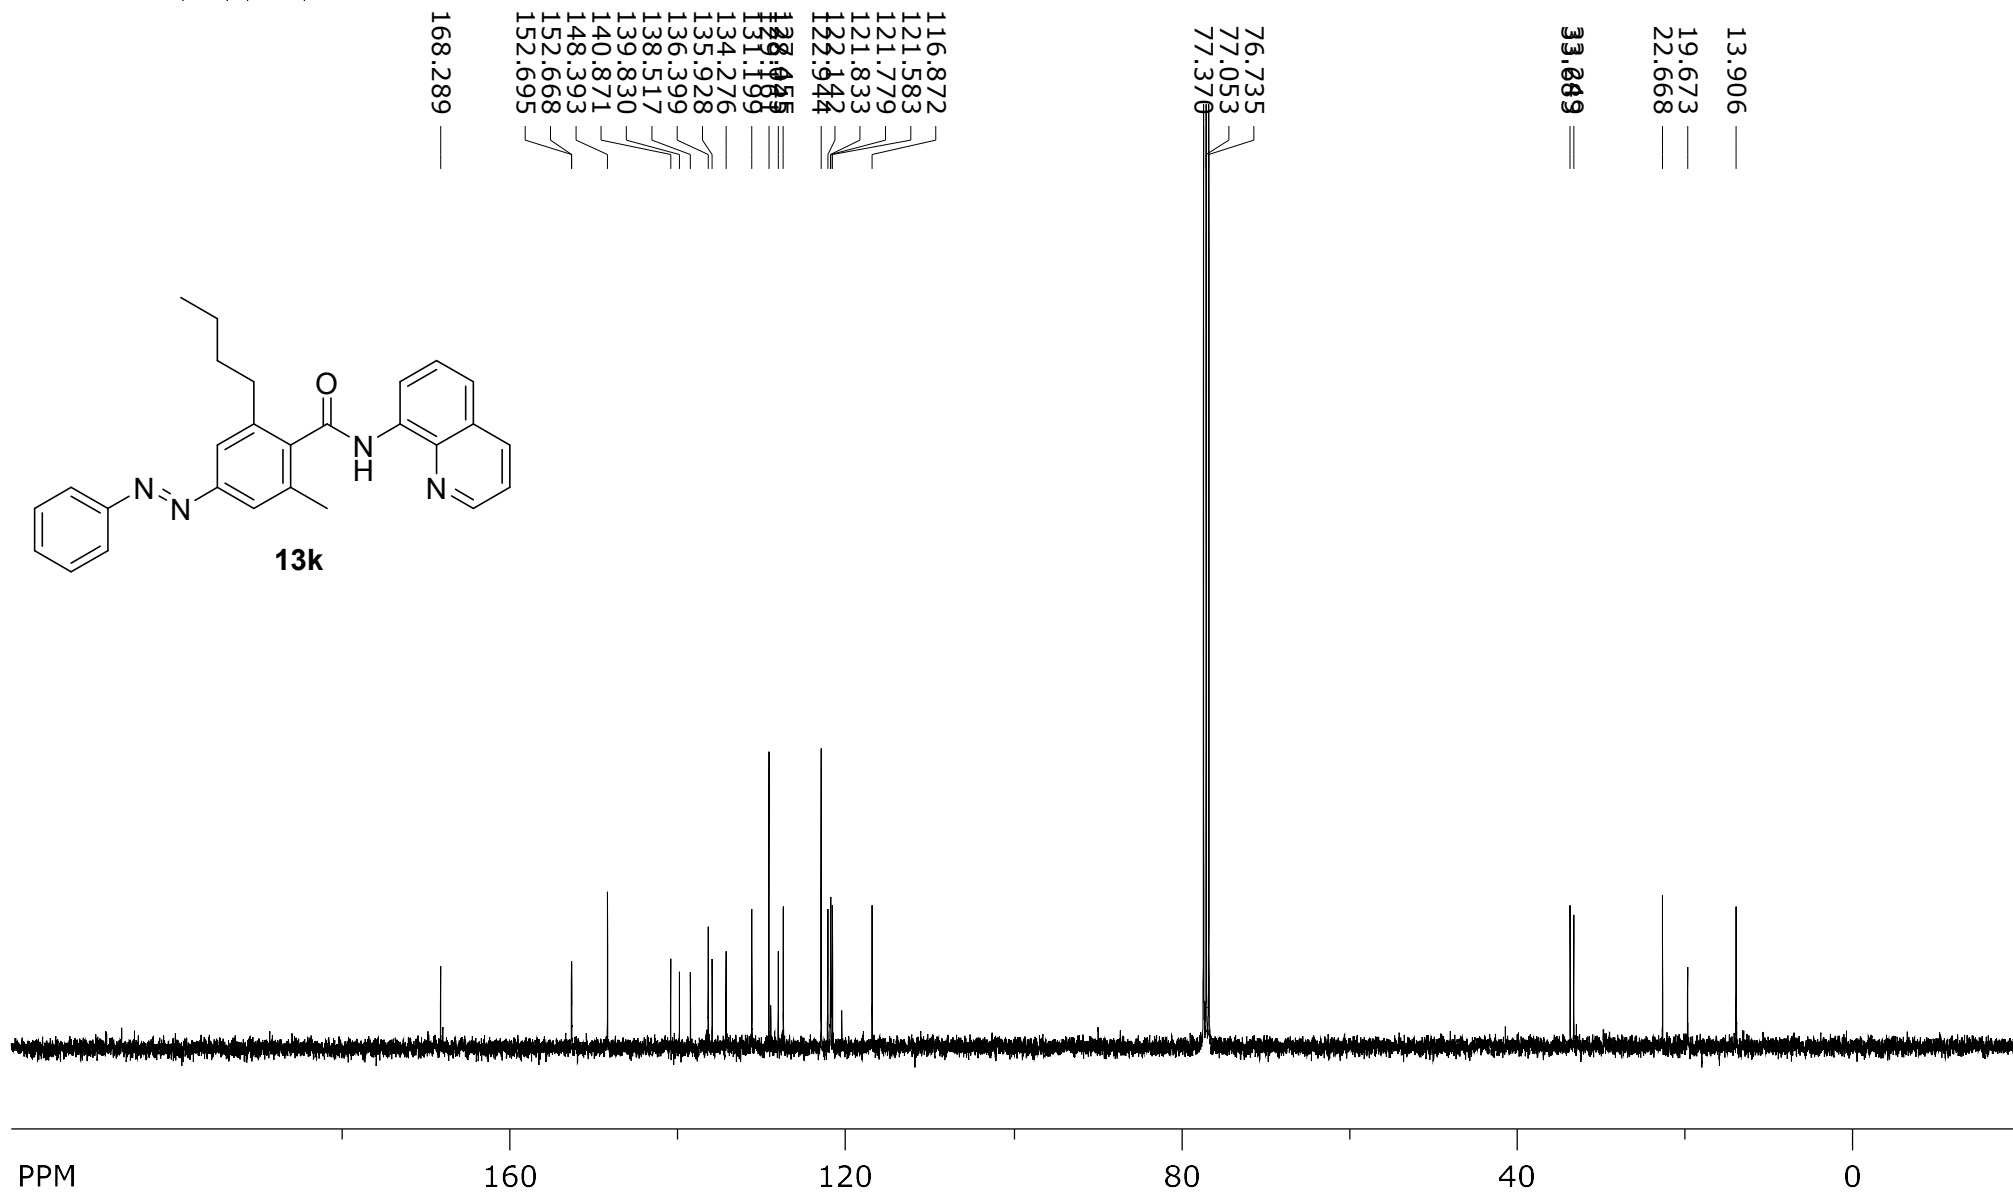

SpinWorks 4: rp 1525  
C13CPD CDCl3 /opt/topspin3.5pl2/nmrdata nmrsu 47

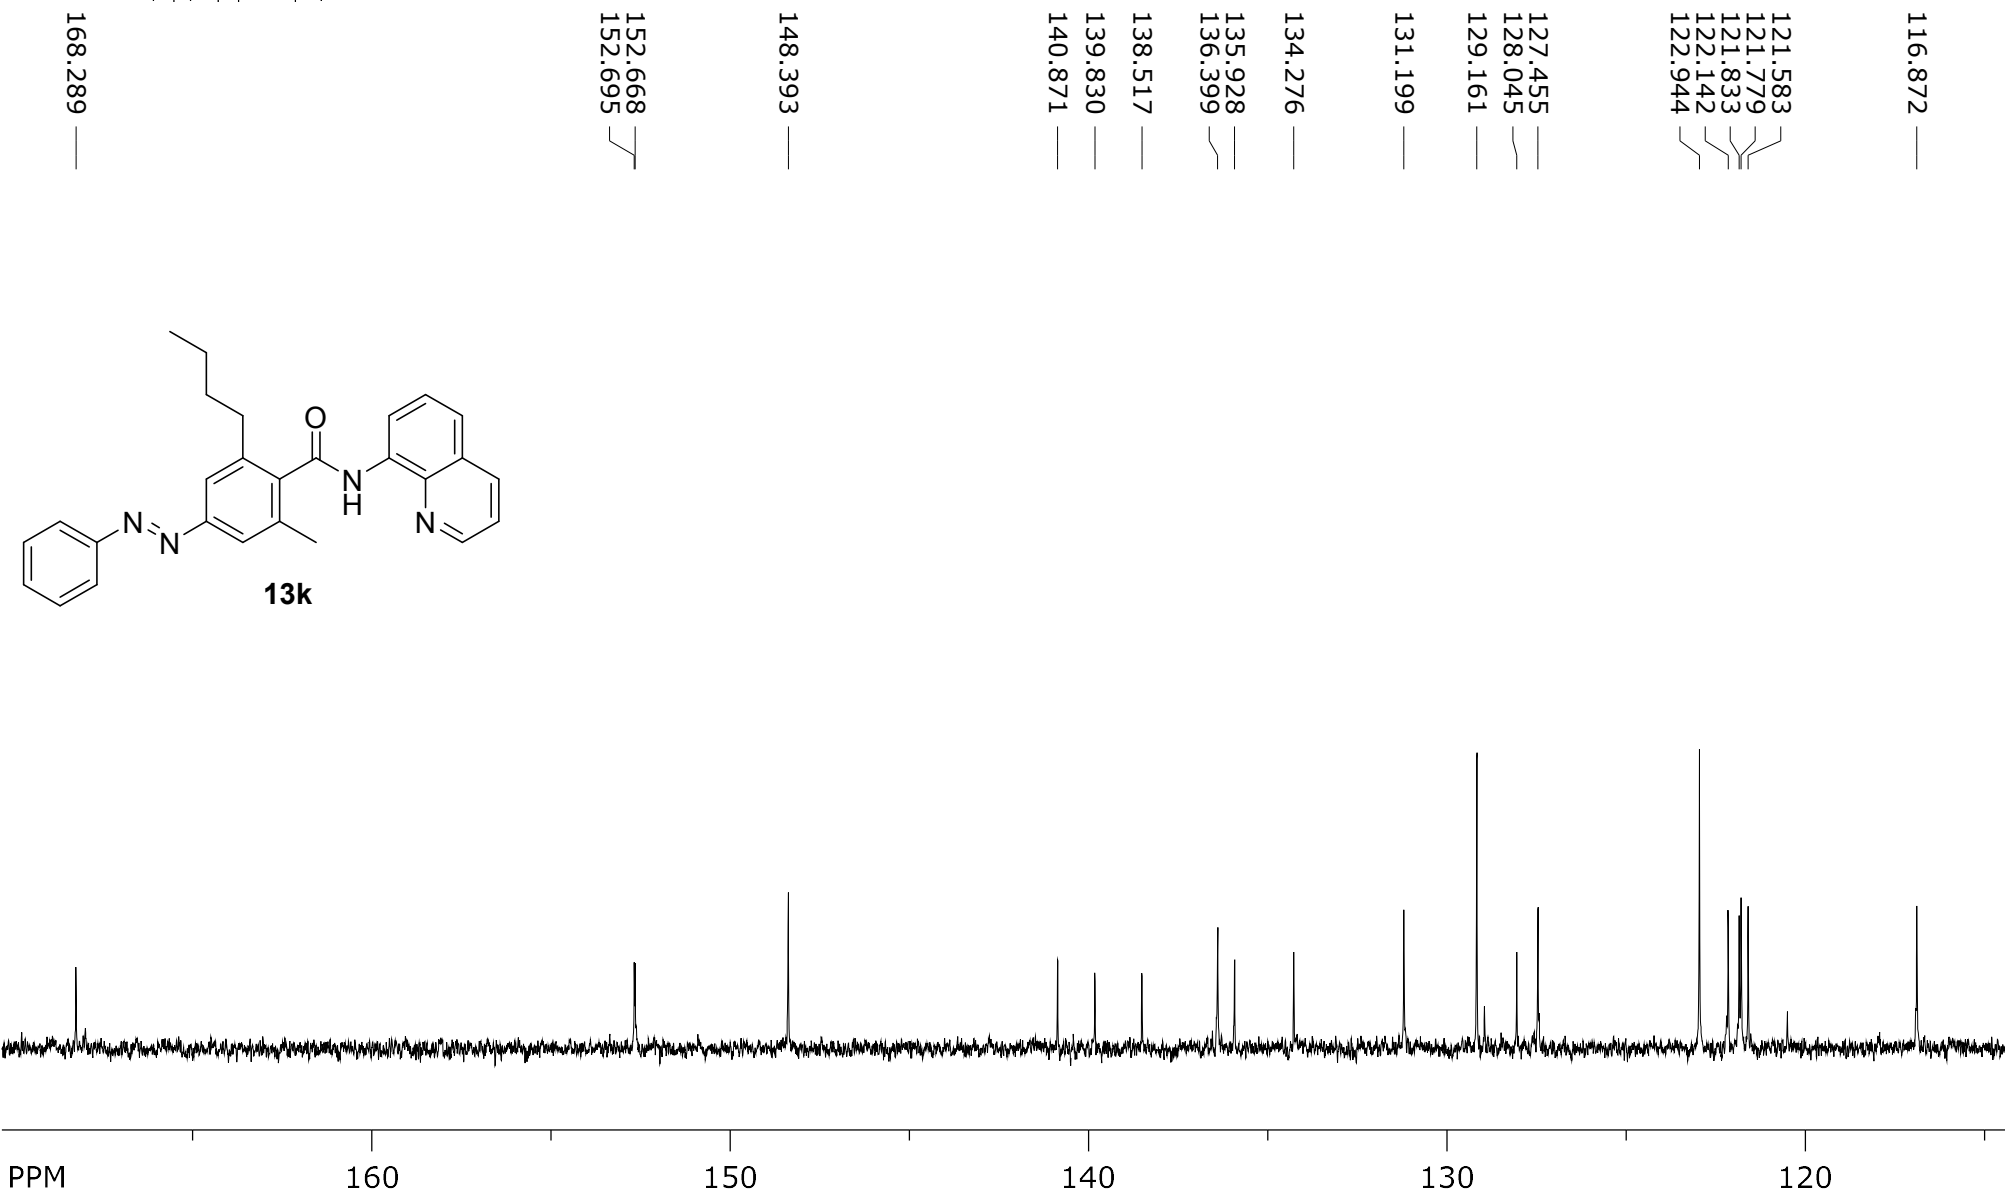

SpinWorks 4: rp 1525  
C13CPD CDCl3 /opt/topspin3.5pl2/nmrdata nmrsu 47

33.249  
33.683

22.668

19.673

13.906

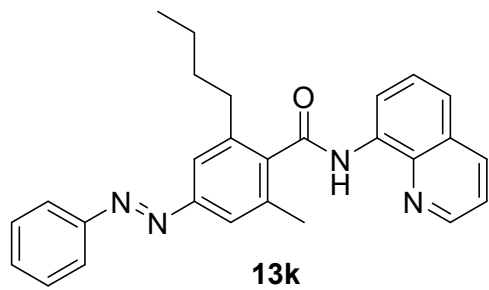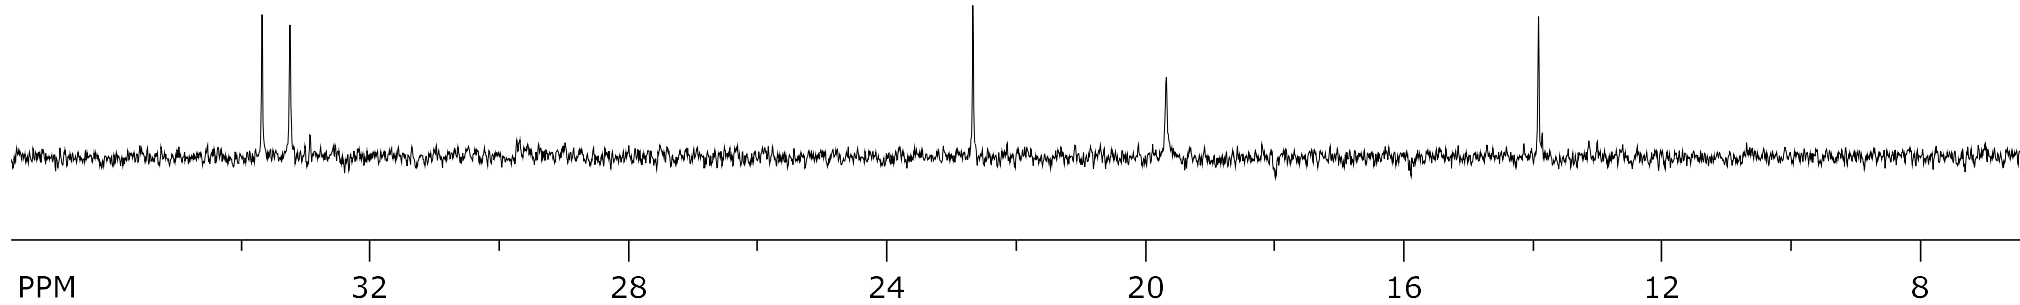

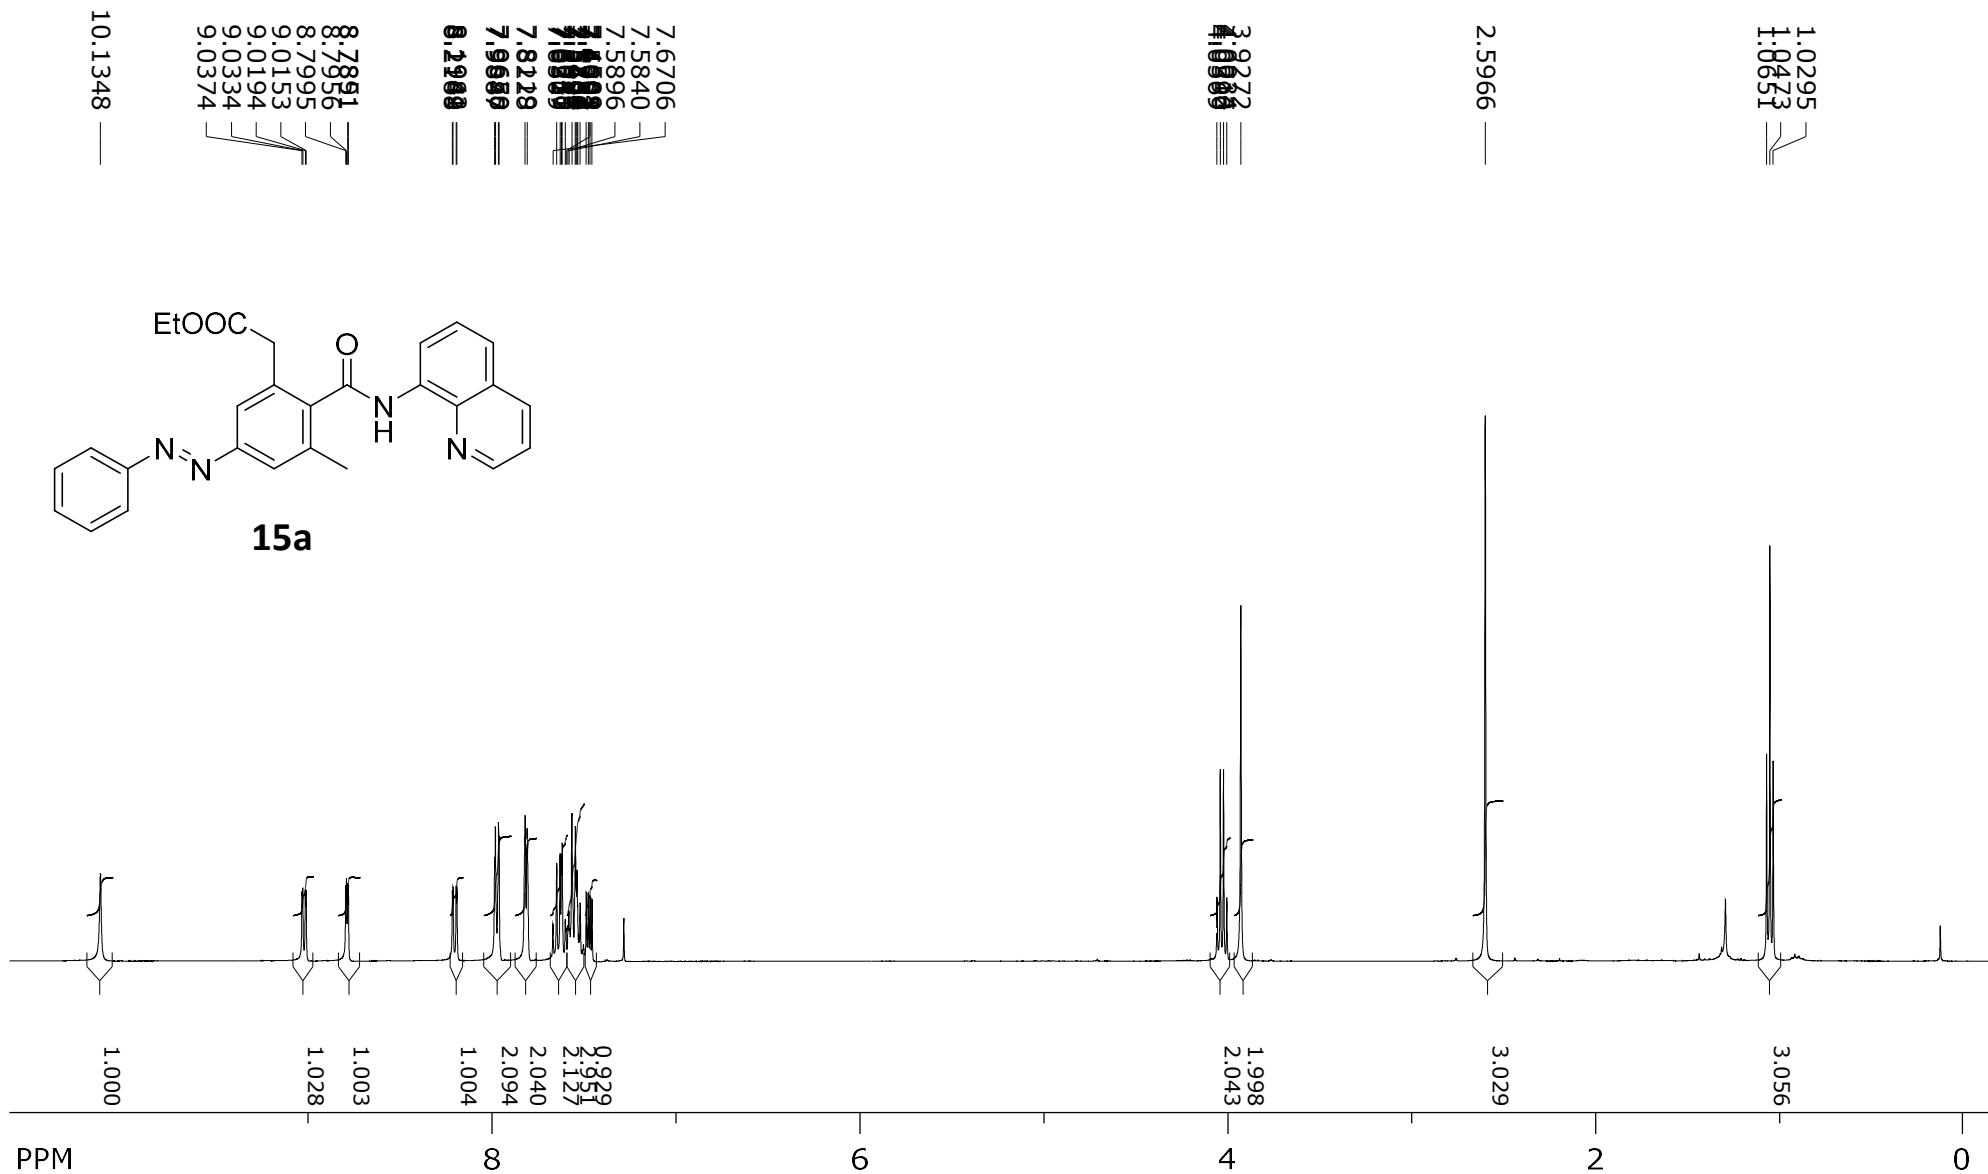

9.0153  
9.0194  
9.0334  
9.0374

8.7851  
8.7891  
8.7956  
8.7995

8.1942  
8.1981  
8.2149  
8.2188

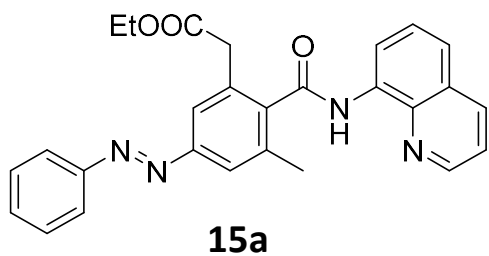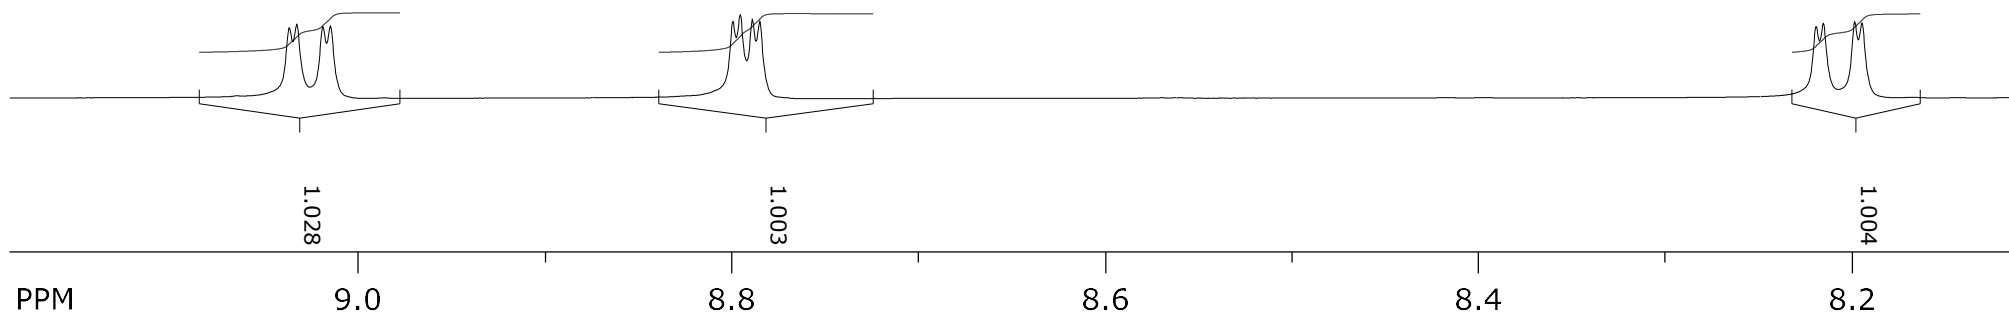

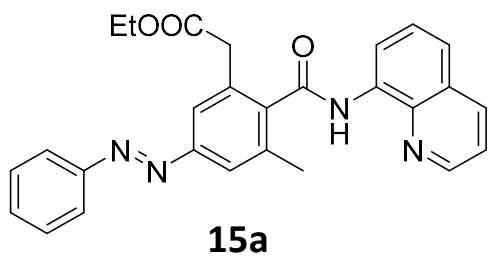

7.9650  
7.9678  
7.9847  
7.9887

7.8119  
7.8228

7.4589  
7.4694  
7.4795  
7.4901  
7.5234  
7.5369  
7.5404  
7.5449  
7.5494  
7.5682  
7.5840  
7.5896  
7.5993  
7.6049  
7.6210  
7.6251  
7.6327  
7.6509  
7.6706

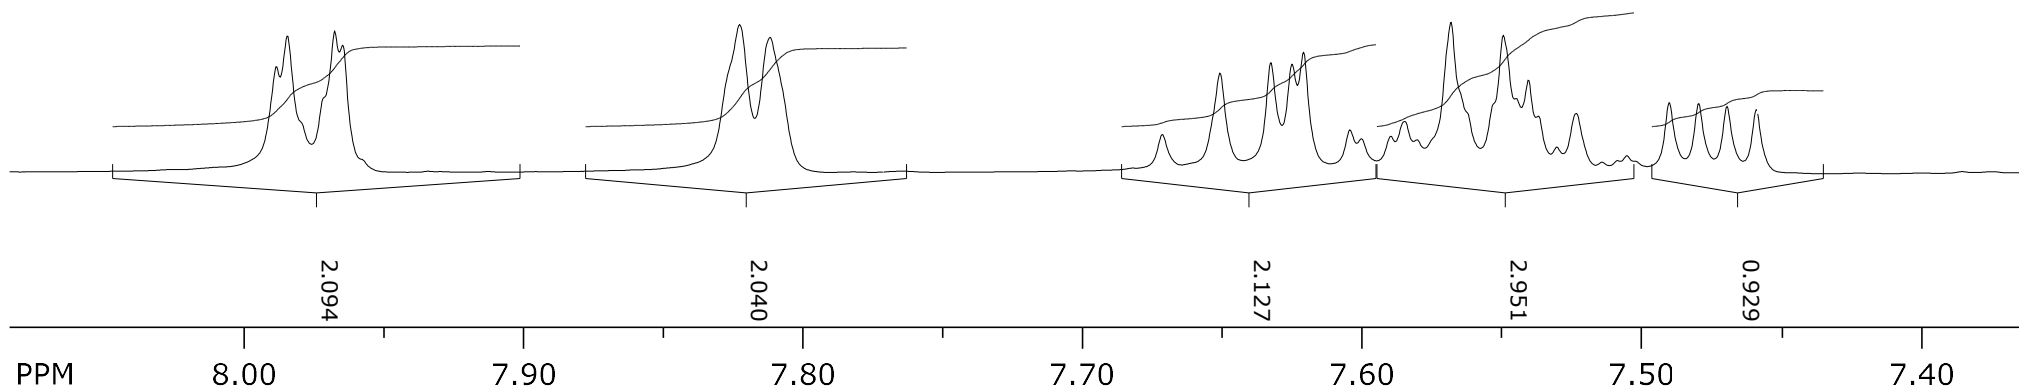

3.9272  
4.0034  
4.0212  
4.0390  
4.0569

2.5966

1.0295  
1.0473  
1.0651

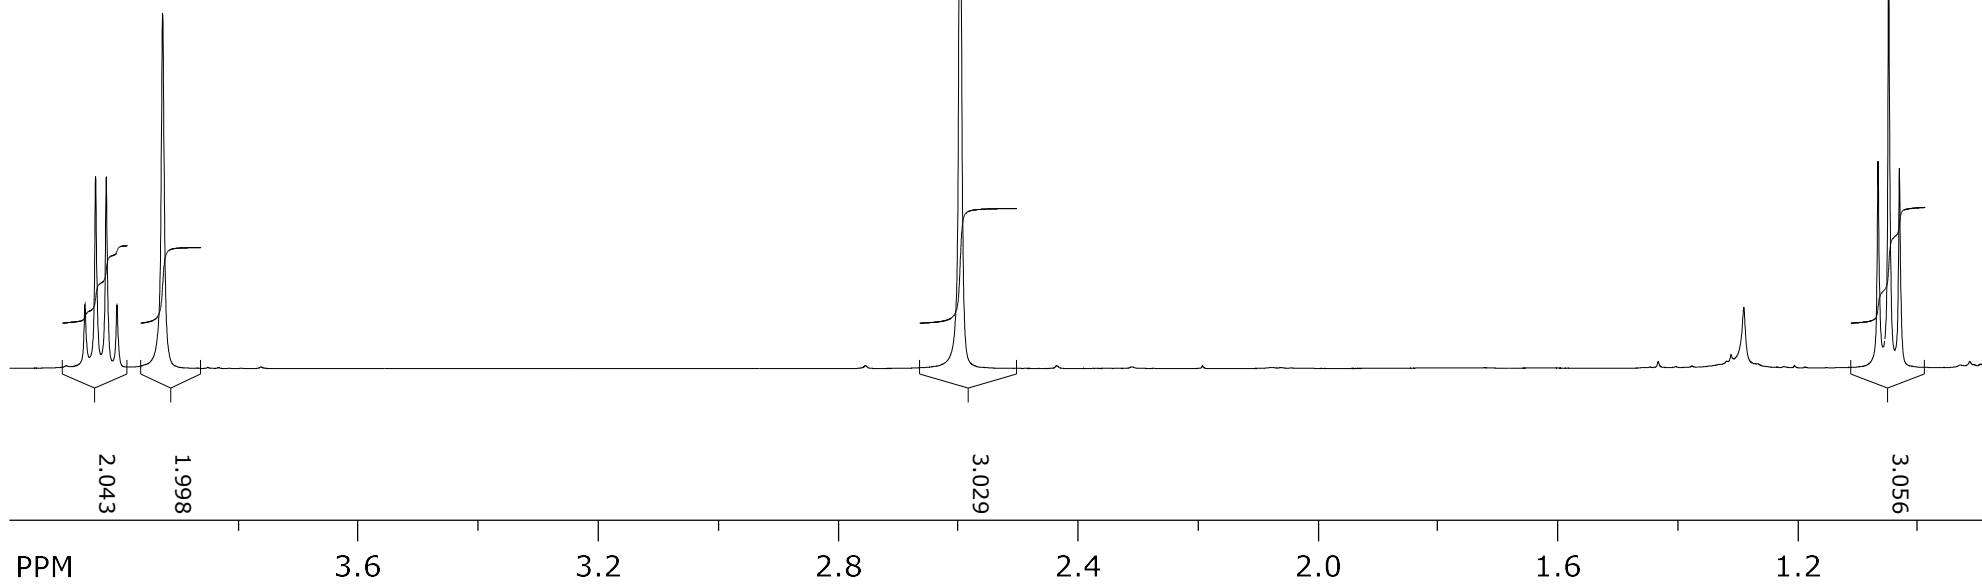



SpinWorks 4: rp-1219b2  
C13CPD256 CDCl3 /opt/topspin3.5pl2/nmrdata nmrsu 33

171.028  
167.530  
152.588  
152.623  
148.403  
140.072  
138.582  
136.390  
136.321  
134.195  
132.550  
131.338  
129.160  
128.084  
128.084  
123.577  
123.007  
122.753  
121.768  
117.014

76.729  
77.046  
77.364

61.097

39.104

19.858

13.896

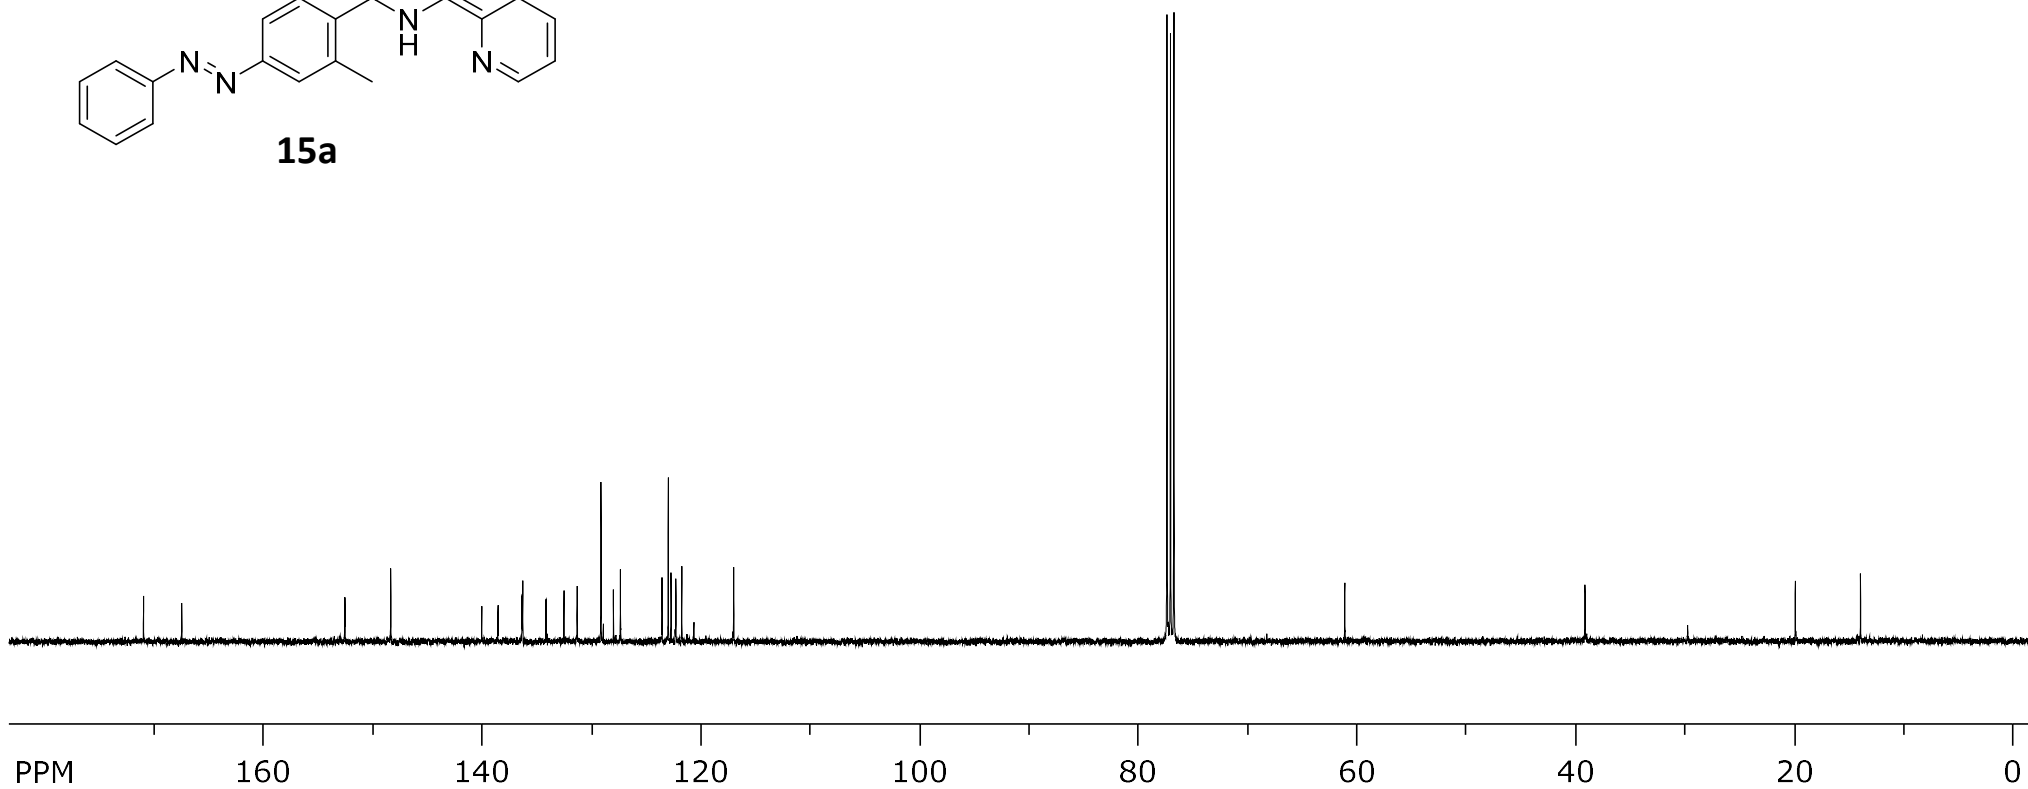

SpinWorks 4: rp-1219b2  
C13CPD256 CDCl3 /opt/topspin3.5pl2/nmrdata nmrsu 33

140.072 —  
138.582 —  
136.321 —  
136.390 —  
134.195 —  
132.550 —  
131.338 —  
129.160 —  
128.022 —  
127.384 —  
123.577 —  
122.768 —  
122.307 —  
122.753 —  
123.007 —  
117.014 —

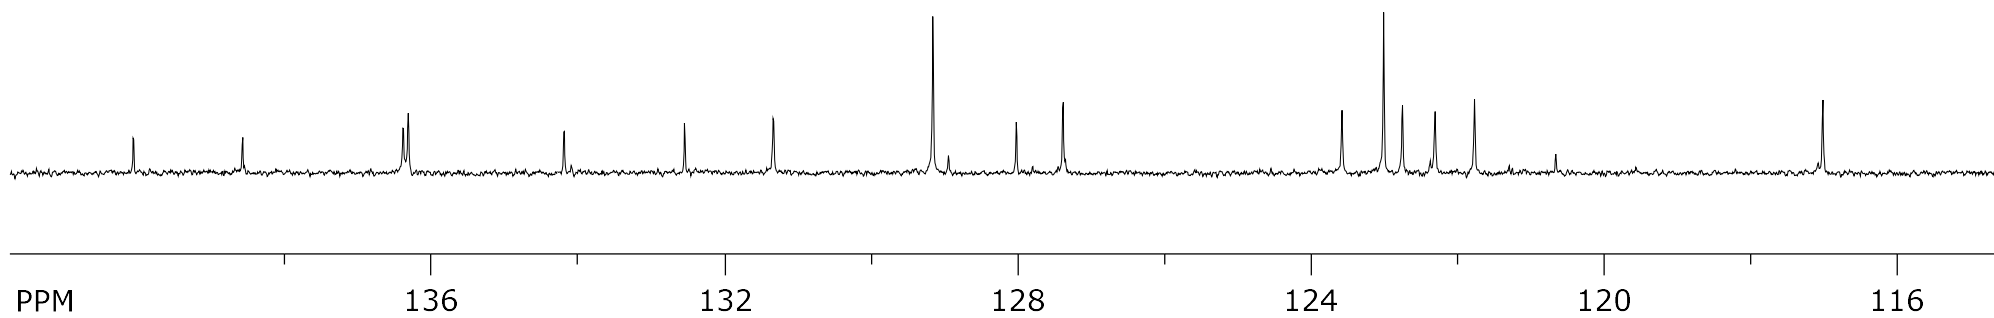

SpinWorks 4: RP 1398 B2 REP  
PROTON CDCl3 /opt/topspin3.5pl2/nmrdata nmrsu 1

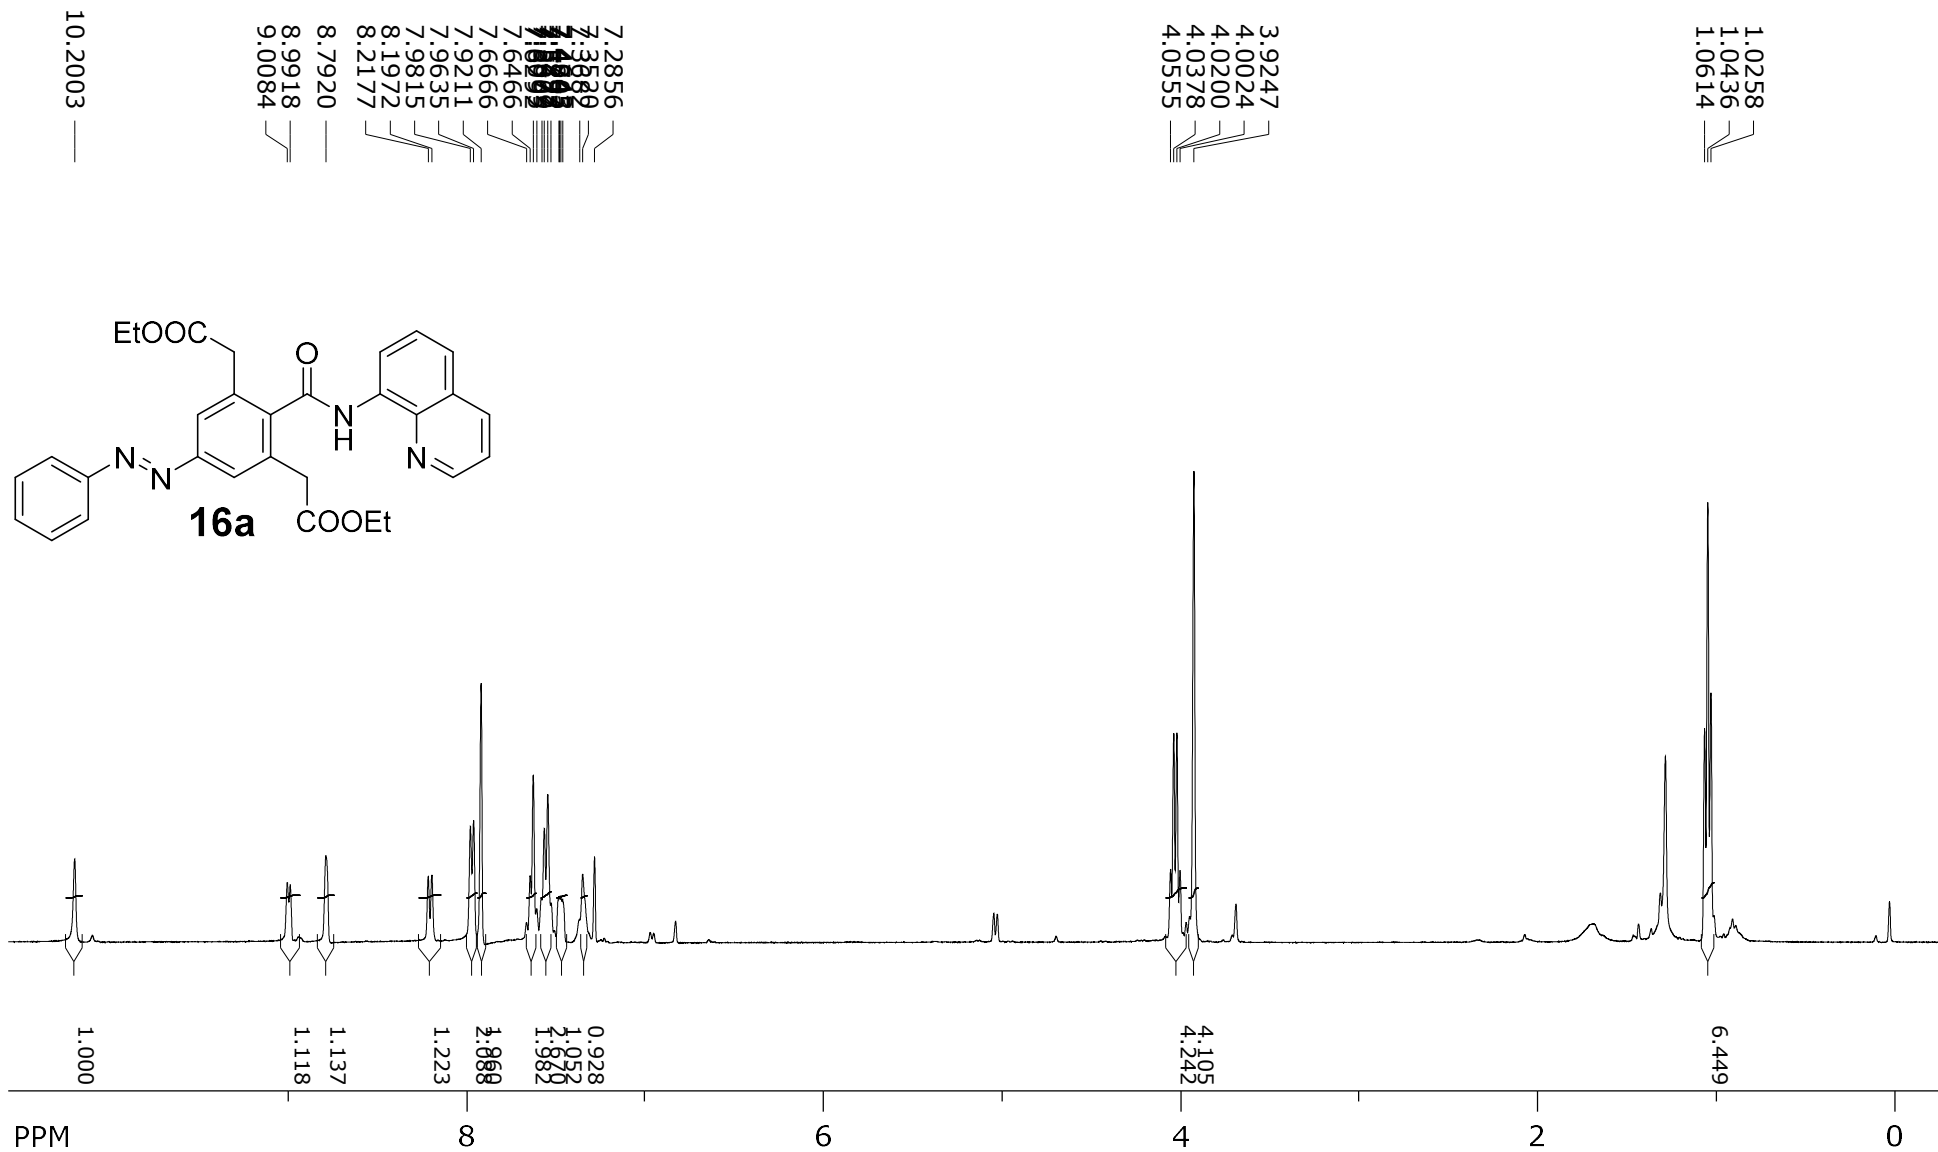

SpinWorks 4: RP 1398 B2 REP  
PROTON CDCl3 /opt/topspin3.5pl2/nmrdata nmrsu 1

8.9918  
9.0084  
8.7920  
8.1972  
8.2177  
7.9211  
7.9635  
7.9815  
7.5292  
7.5477  
7.5672  
7.5809  
7.6095  
7.6292  
7.6466  
7.6666  
7.4847  
7.4745  
7.4805  
7.4643  
7.3682  
7.3520  
7.2856

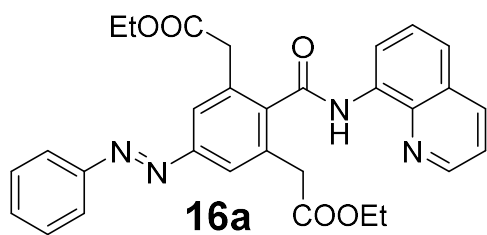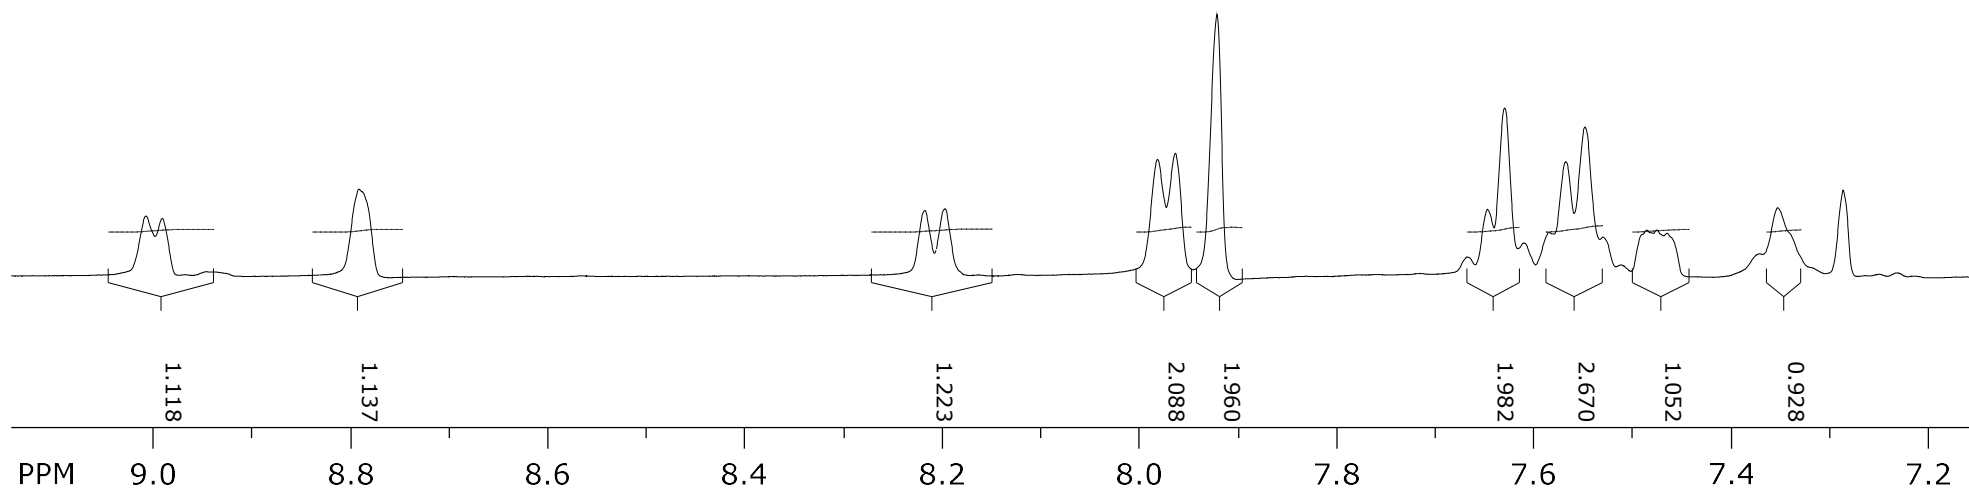

SpinWorks 4: RP 1398 B2 REP  
PROTON CDCl3 /opt/topspin3.5pl2/nmrdata nmrsu 1

3.9247  
4.0024  
4.0200  
4.0378  
4.0555

1.0258  
1.0436  
1.0614

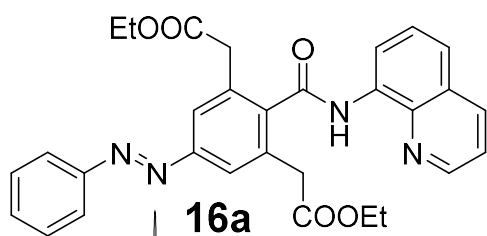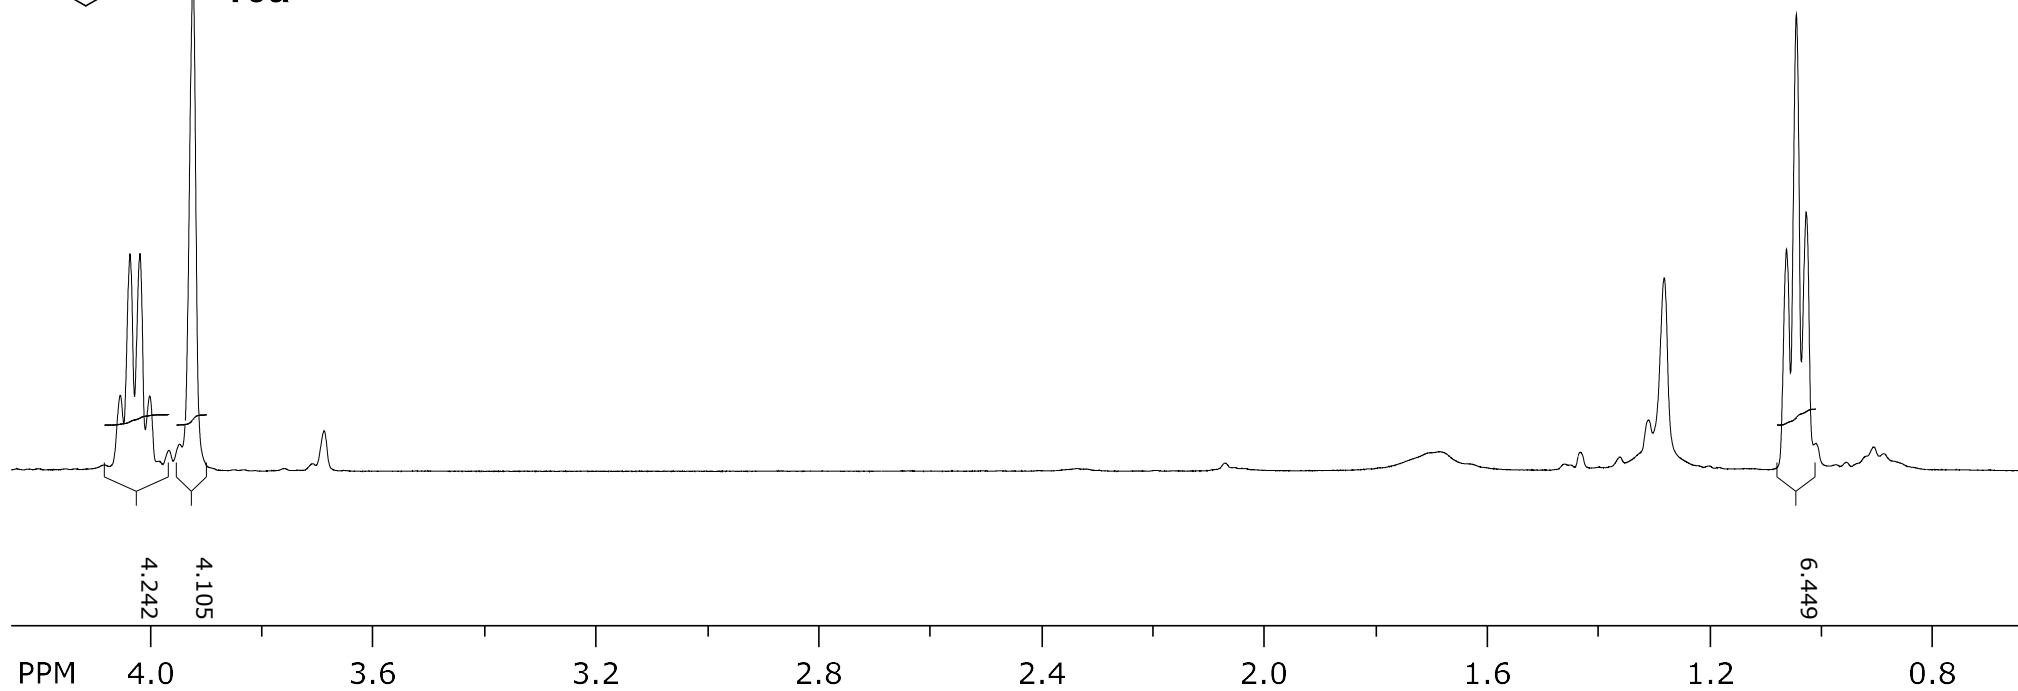

SpinWorks 4: RP 1398 B2  
C13CPD CDCl3 /opt/topspin3.5pl2/nmrdata nmrsu 1

170.816  
166.869  
152.543  
152.577  
148.365  
140.107  
138.613  
136.280  
134.114  
132.950  
131.495  
129.186  
127.990  
127.351  
124.118  
123.085  
122.518  
121.791  
117.256

76.754  
77.071  
77.389

61.189

39.226

13.888

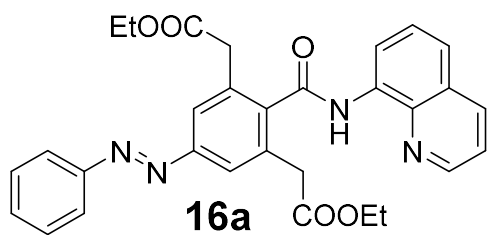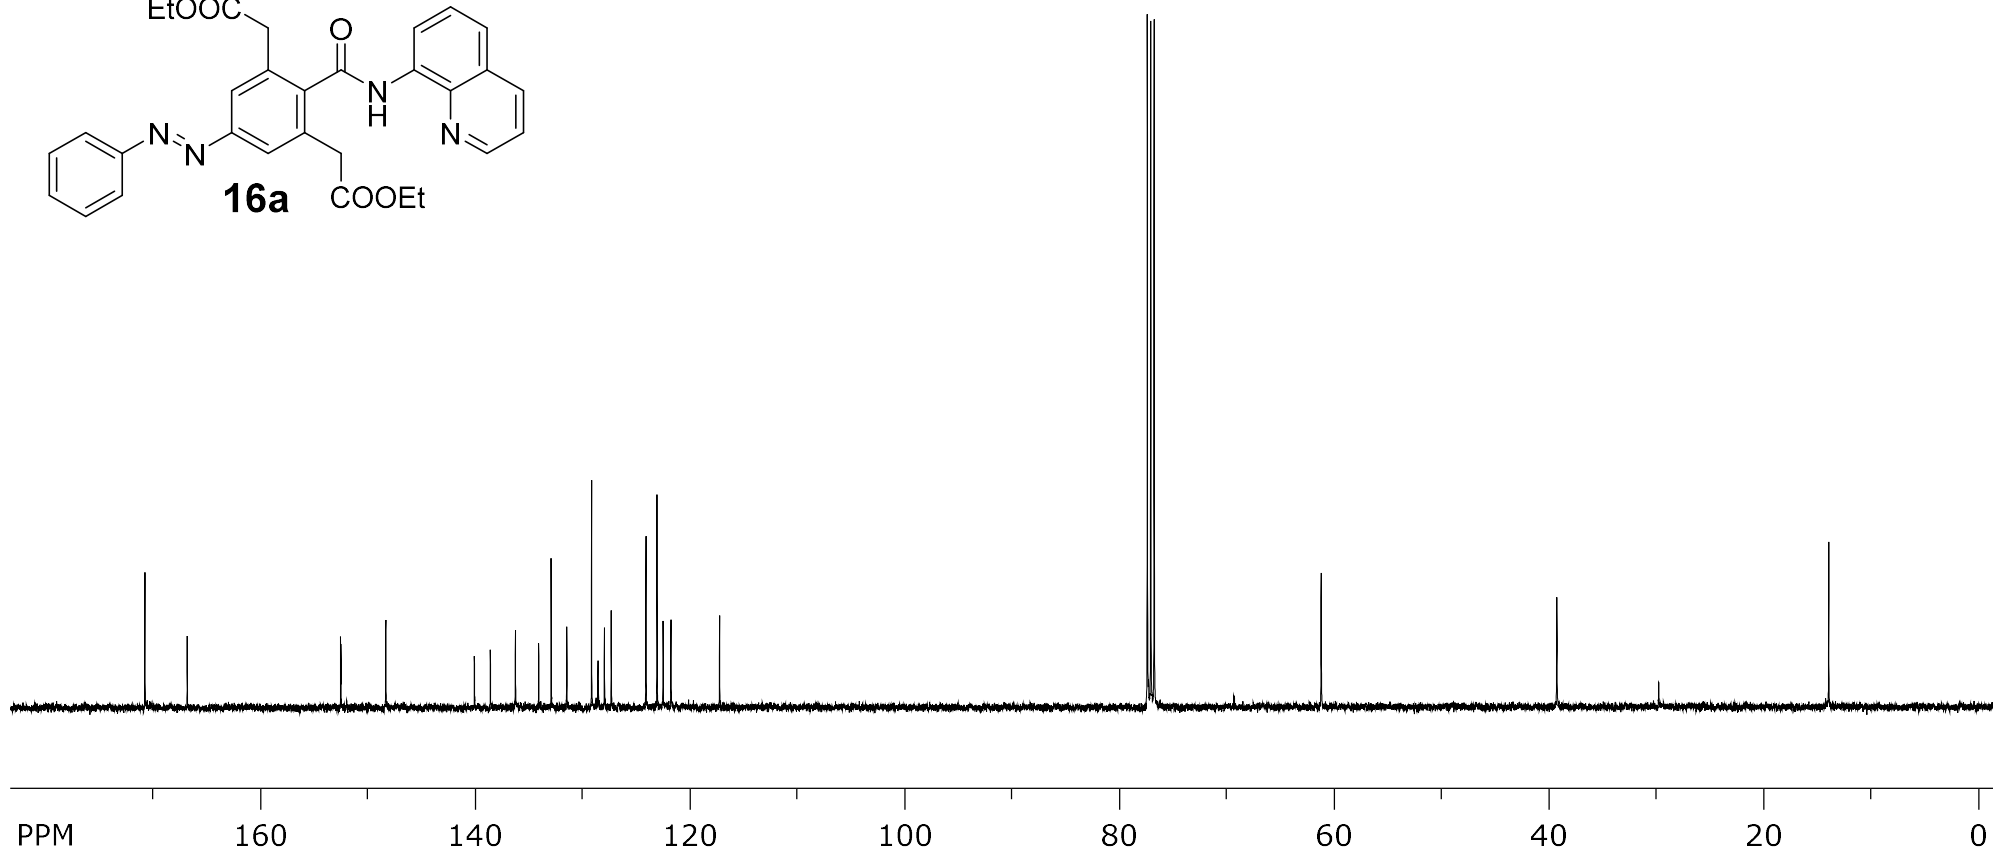

SpinWorks 4: RP 1282  
PROTON CDCl3 /opt/topspin3.5pl2/nmrdata nmrsu 1

7.2850  
7.3324  
7.3533  
7.3827  
7.4029  
7.4219  
7.4411  
7.8114  
7.8214  
7.8314  
7.8414  
7.8514  
7.8614  
7.8714  
7.8814  
7.8914  
7.9014  
7.9114  
7.9214  
7.9314  
7.9414  
7.9558  
8.1501  
8.1707  
8.4617  
8.4719  
8.8021  
8.8085  
8.8173  
8.8234  
9.4308

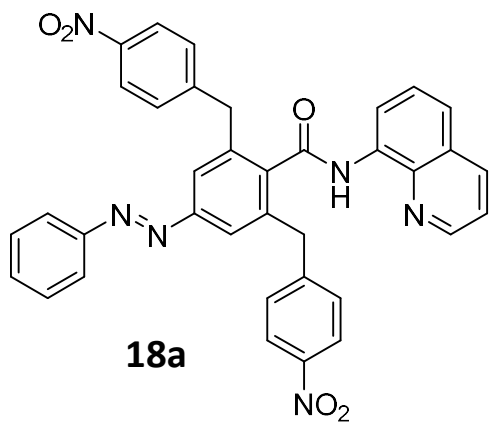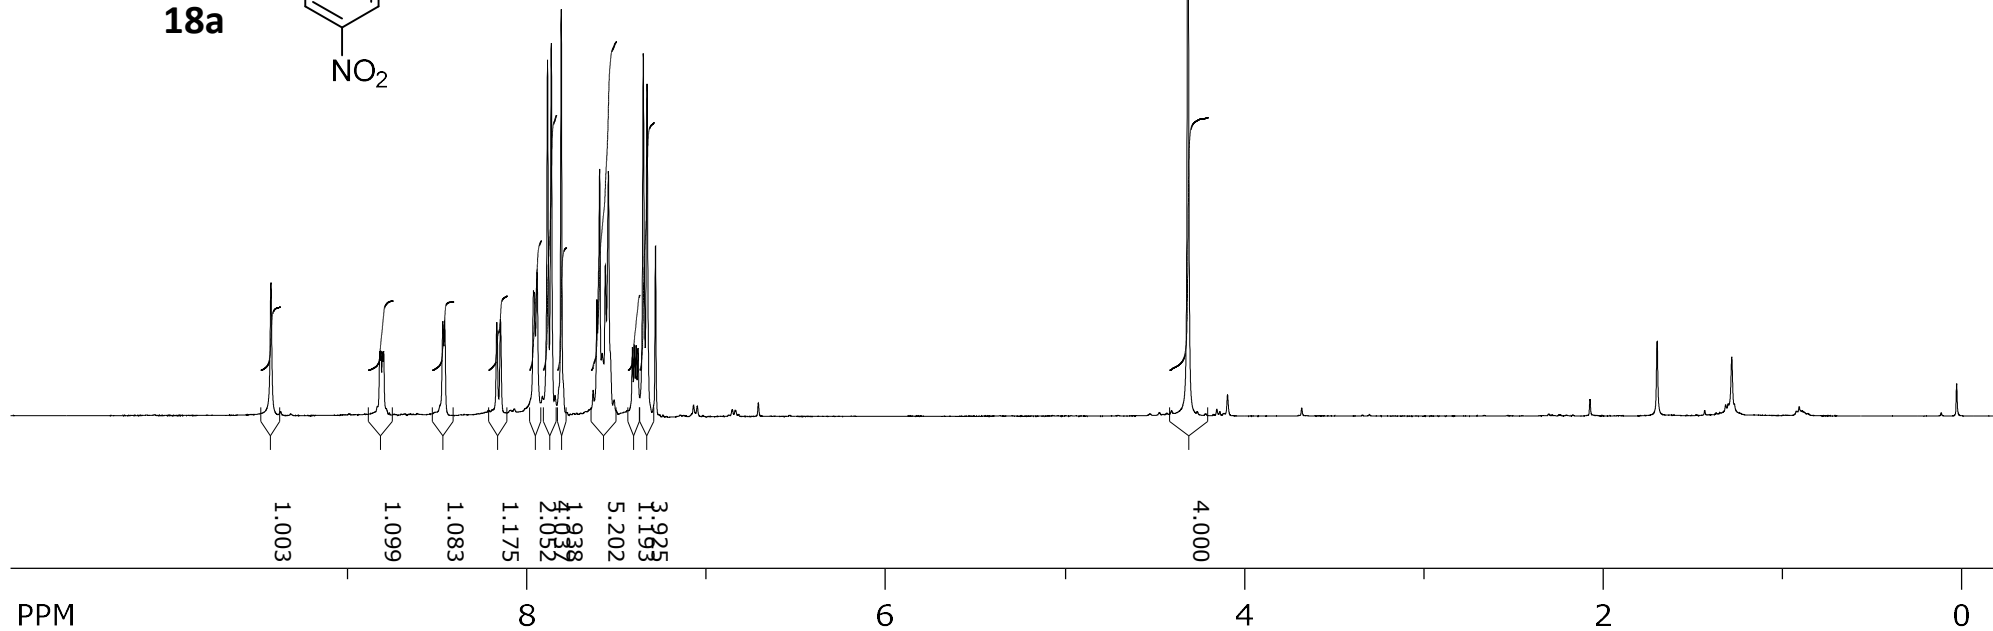

SpinWorks 4: RP 1282  
PROTON CDCl3 /opt/topspin3.5pl2/nmrdata nmrsu 1

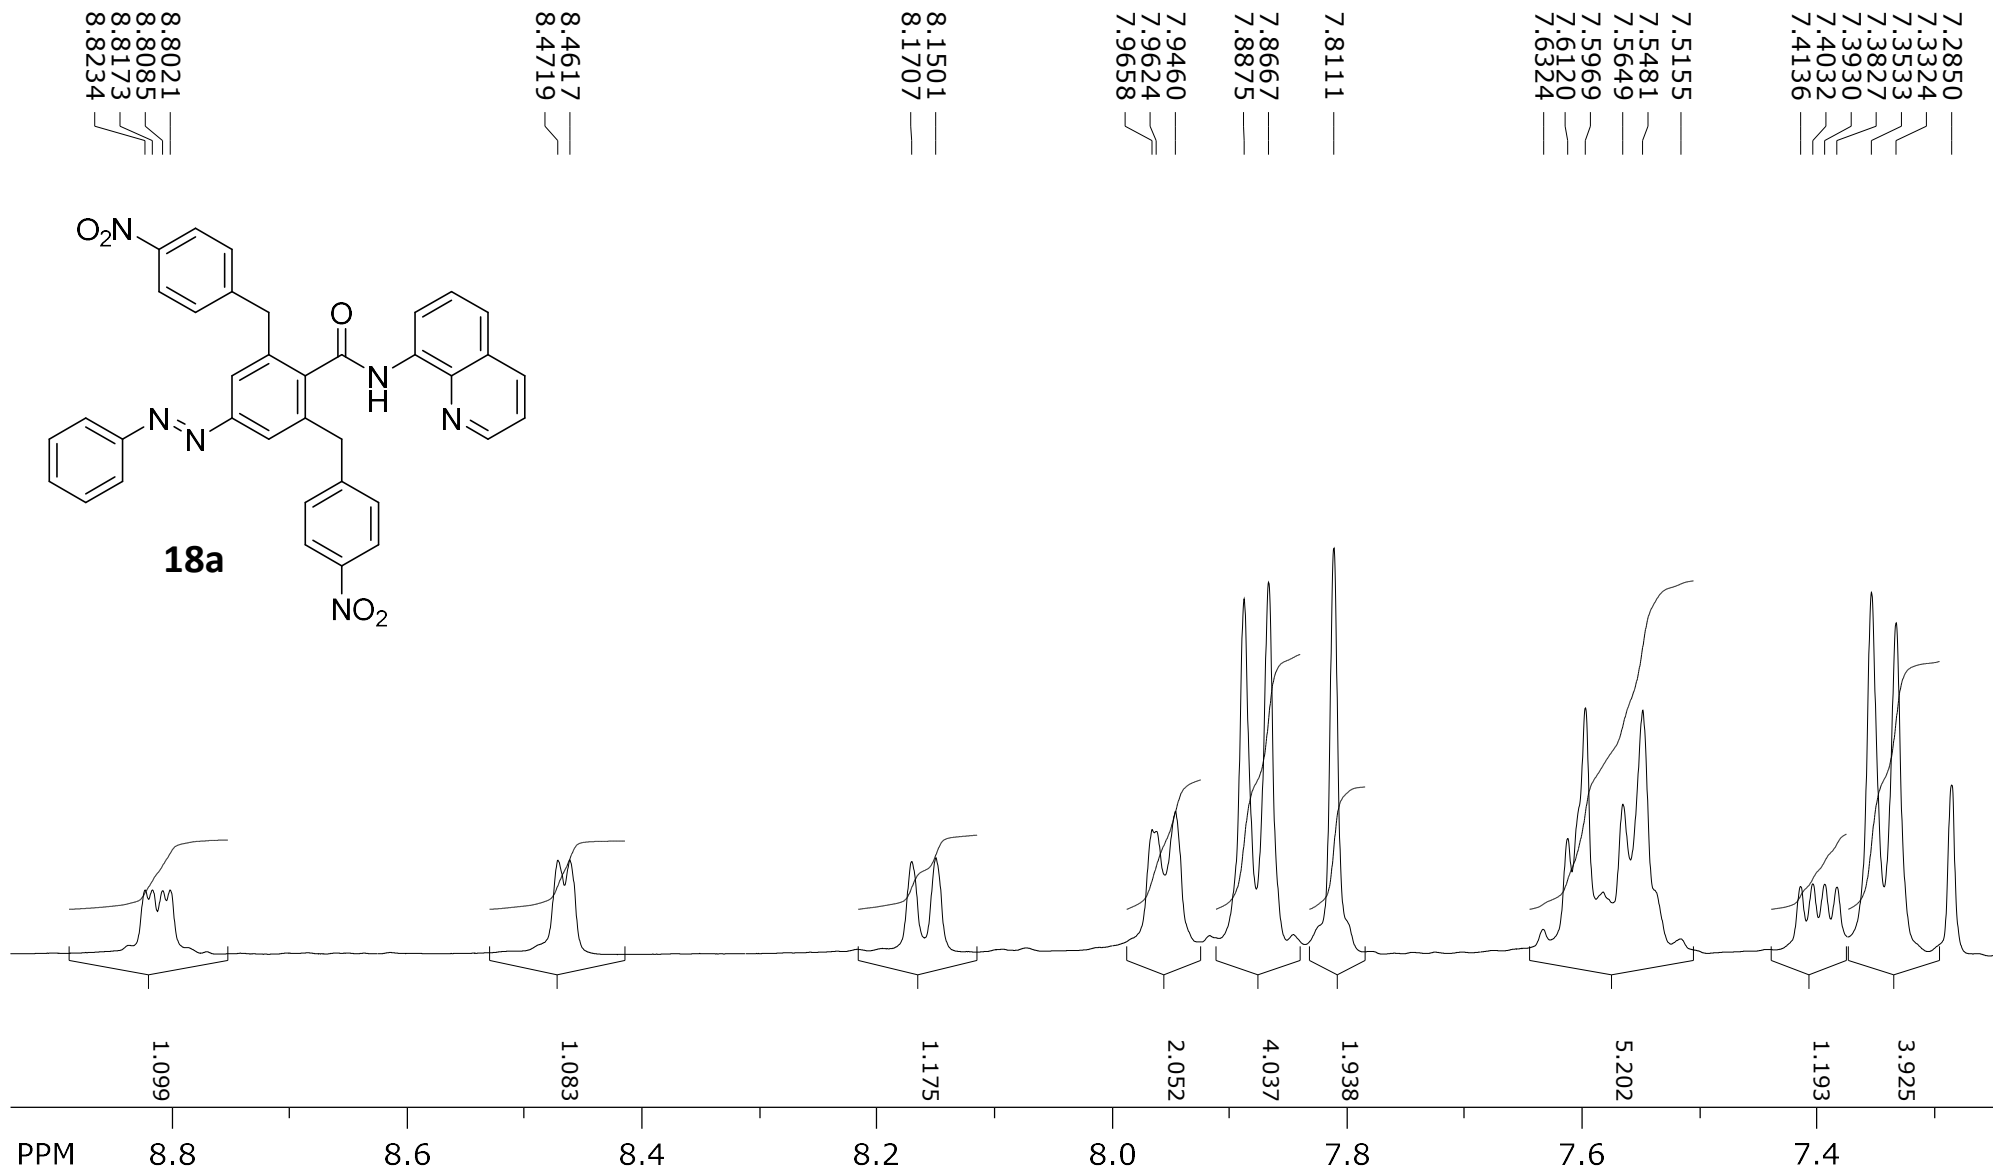



SpinWorks 4: RP 1282  
C13CPD CDCl3 /opt/topspin3.5pl2/nmrdata nmrsu 1

166.860  
152.920  
148.162  
147.249  
146.359  
139.941  
138.116  
137.791  
136.405  
133.359  
131.820  
129.749  
127.209  
123.691  
123.120  
122.745  
121.943  
116.571

77.411  
77.093  
76.776

39.440

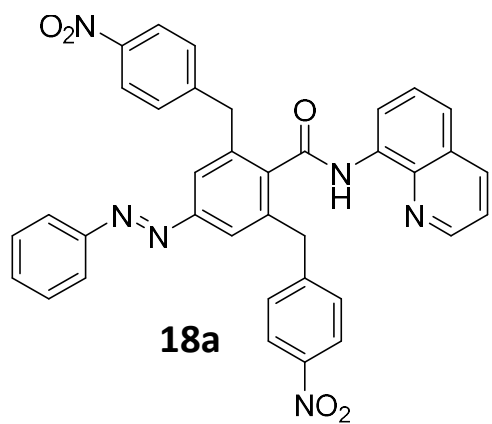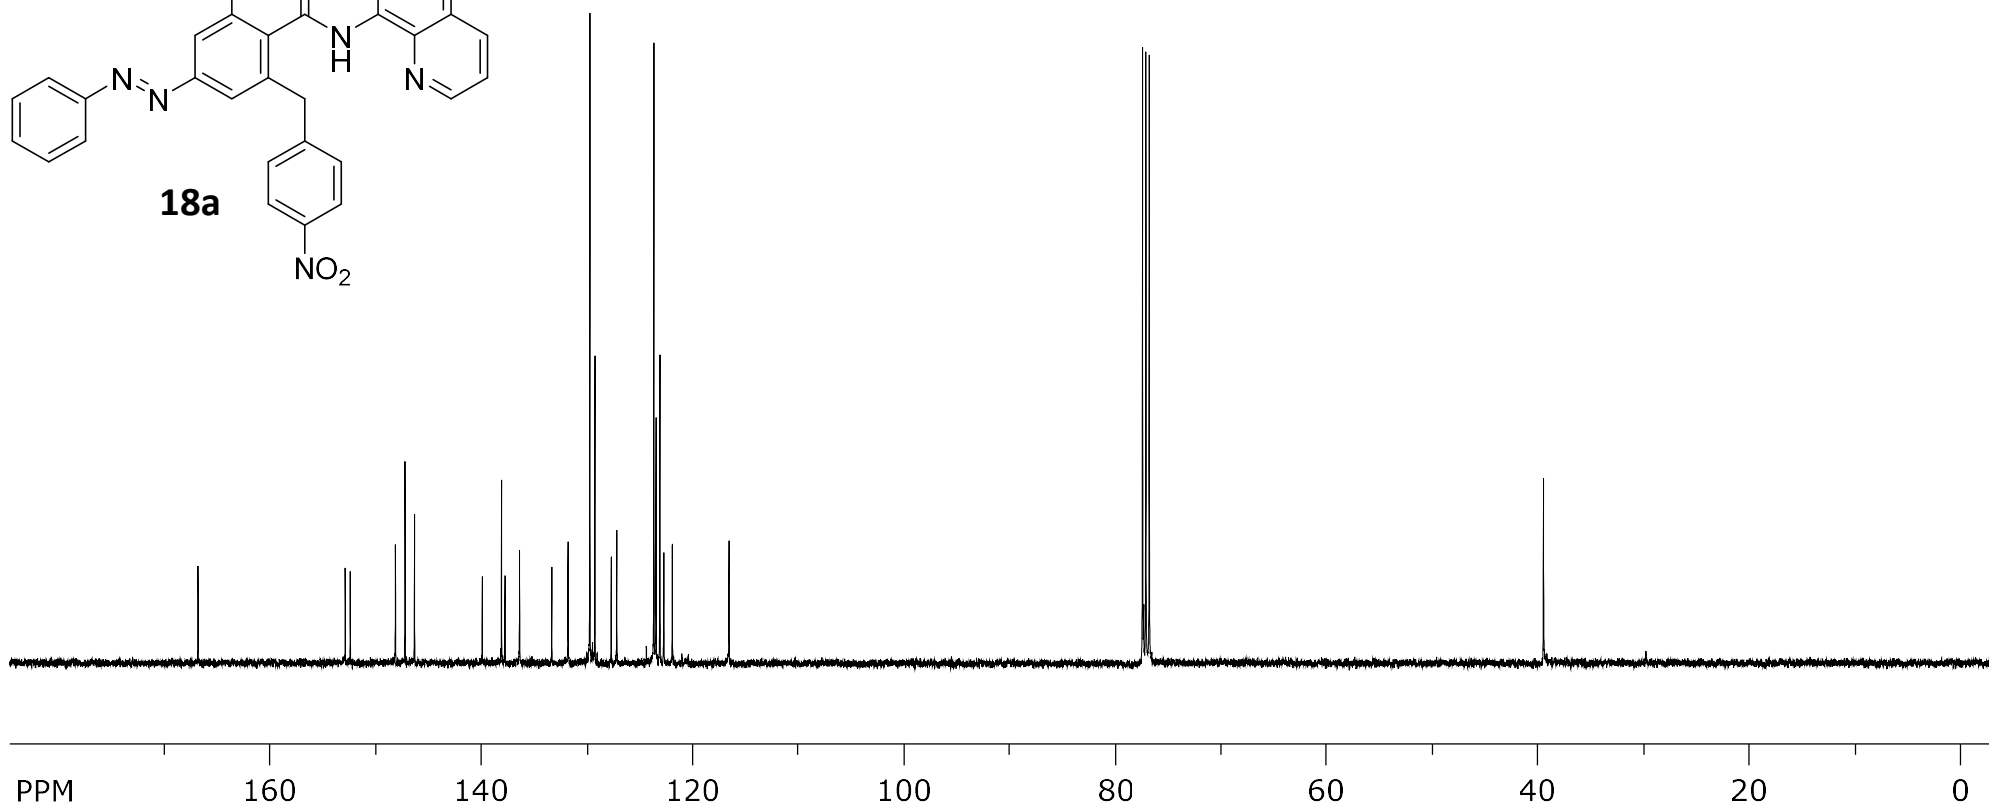

SpinWorks 4: RP 1282  
C13CPD CDCl3 /opt/topspin3.5pl2/nmrdata nmrsu 1

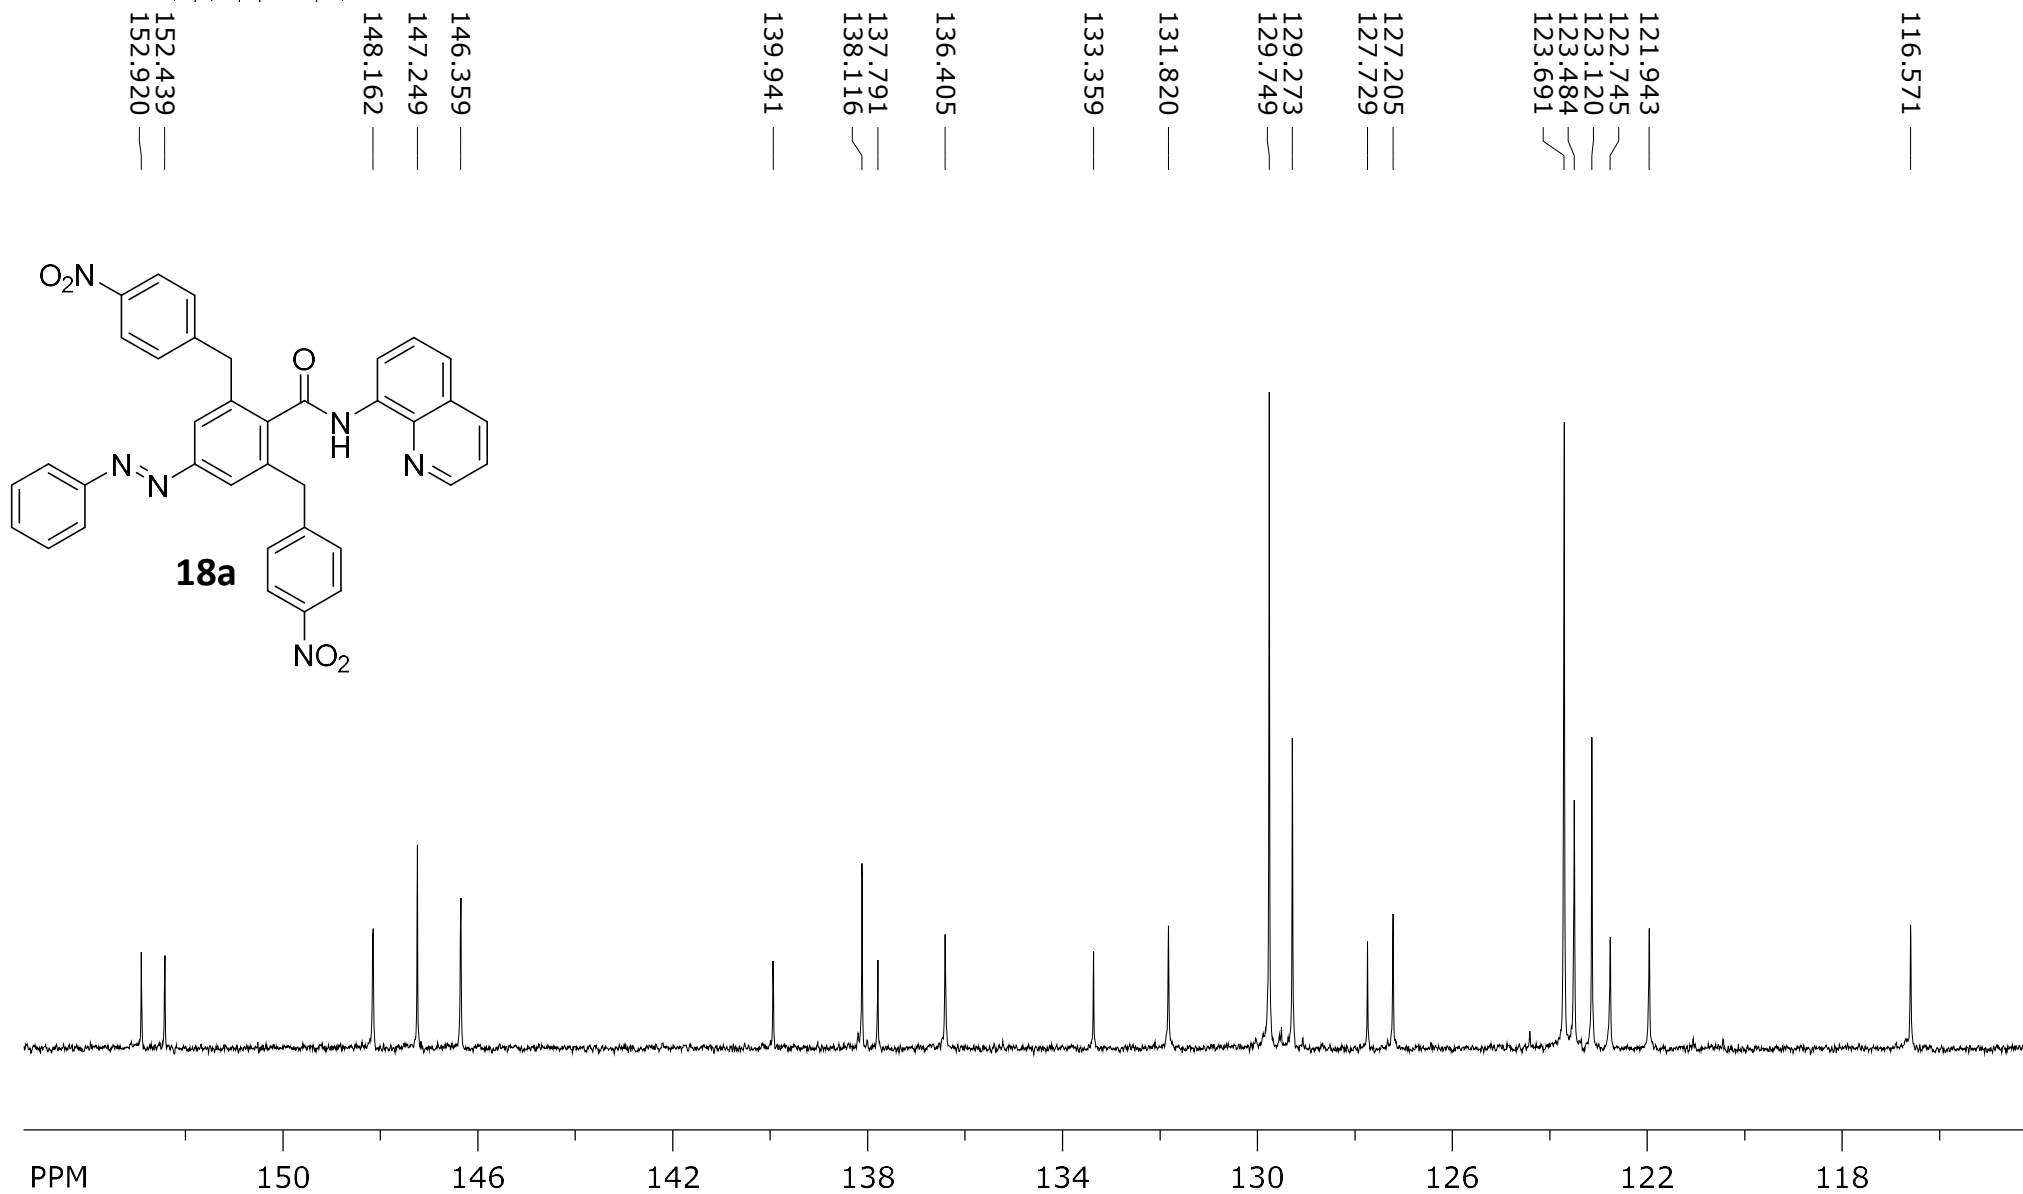

SpinWorks 4: RP-1281 B2  
PROTON CDCl3 /opt/topspin3.5pl2/nmrdata nmrsu 51

9.4136  
8.8152  
8.8103  
8.8000  
8.7949  
8.4658  
8.4557  
8.1679  
8.1473  
8.1473  
7.8843  
7.8640  
7.8298  
7.7998  
7.7998  
7.7998  
7.7998  
7.7998  
7.7998  
7.3797  
7.3797  
7.3797  
7.3666  
7.3484  
7.3282  
7.2837  
4.3057  
2.4756

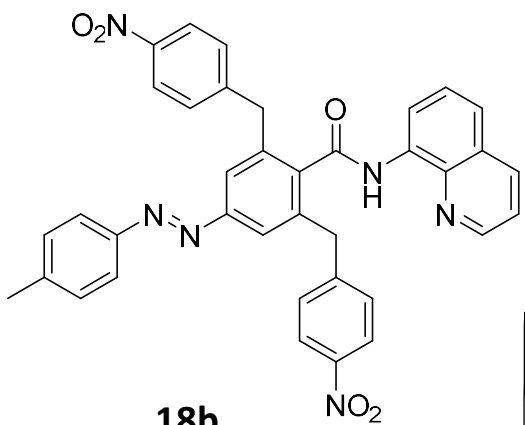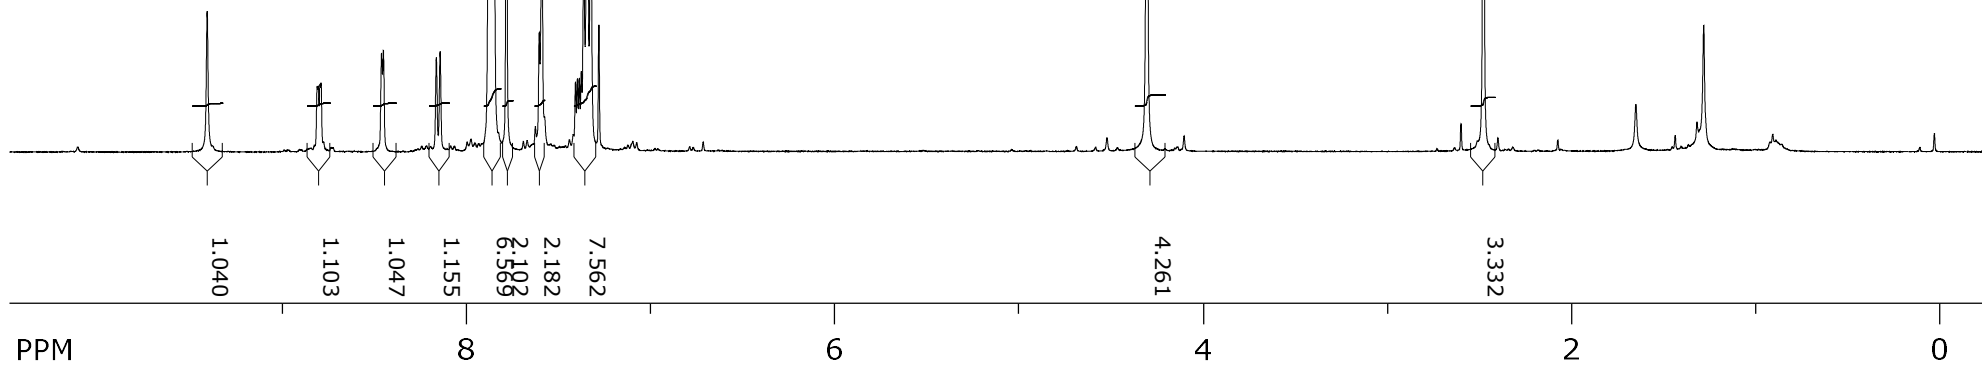

SpinWorks 4: RP-1281 B2  
PROTON CDCl3 /opt/topspin3.5pl2/nmrdata nmrsu 51

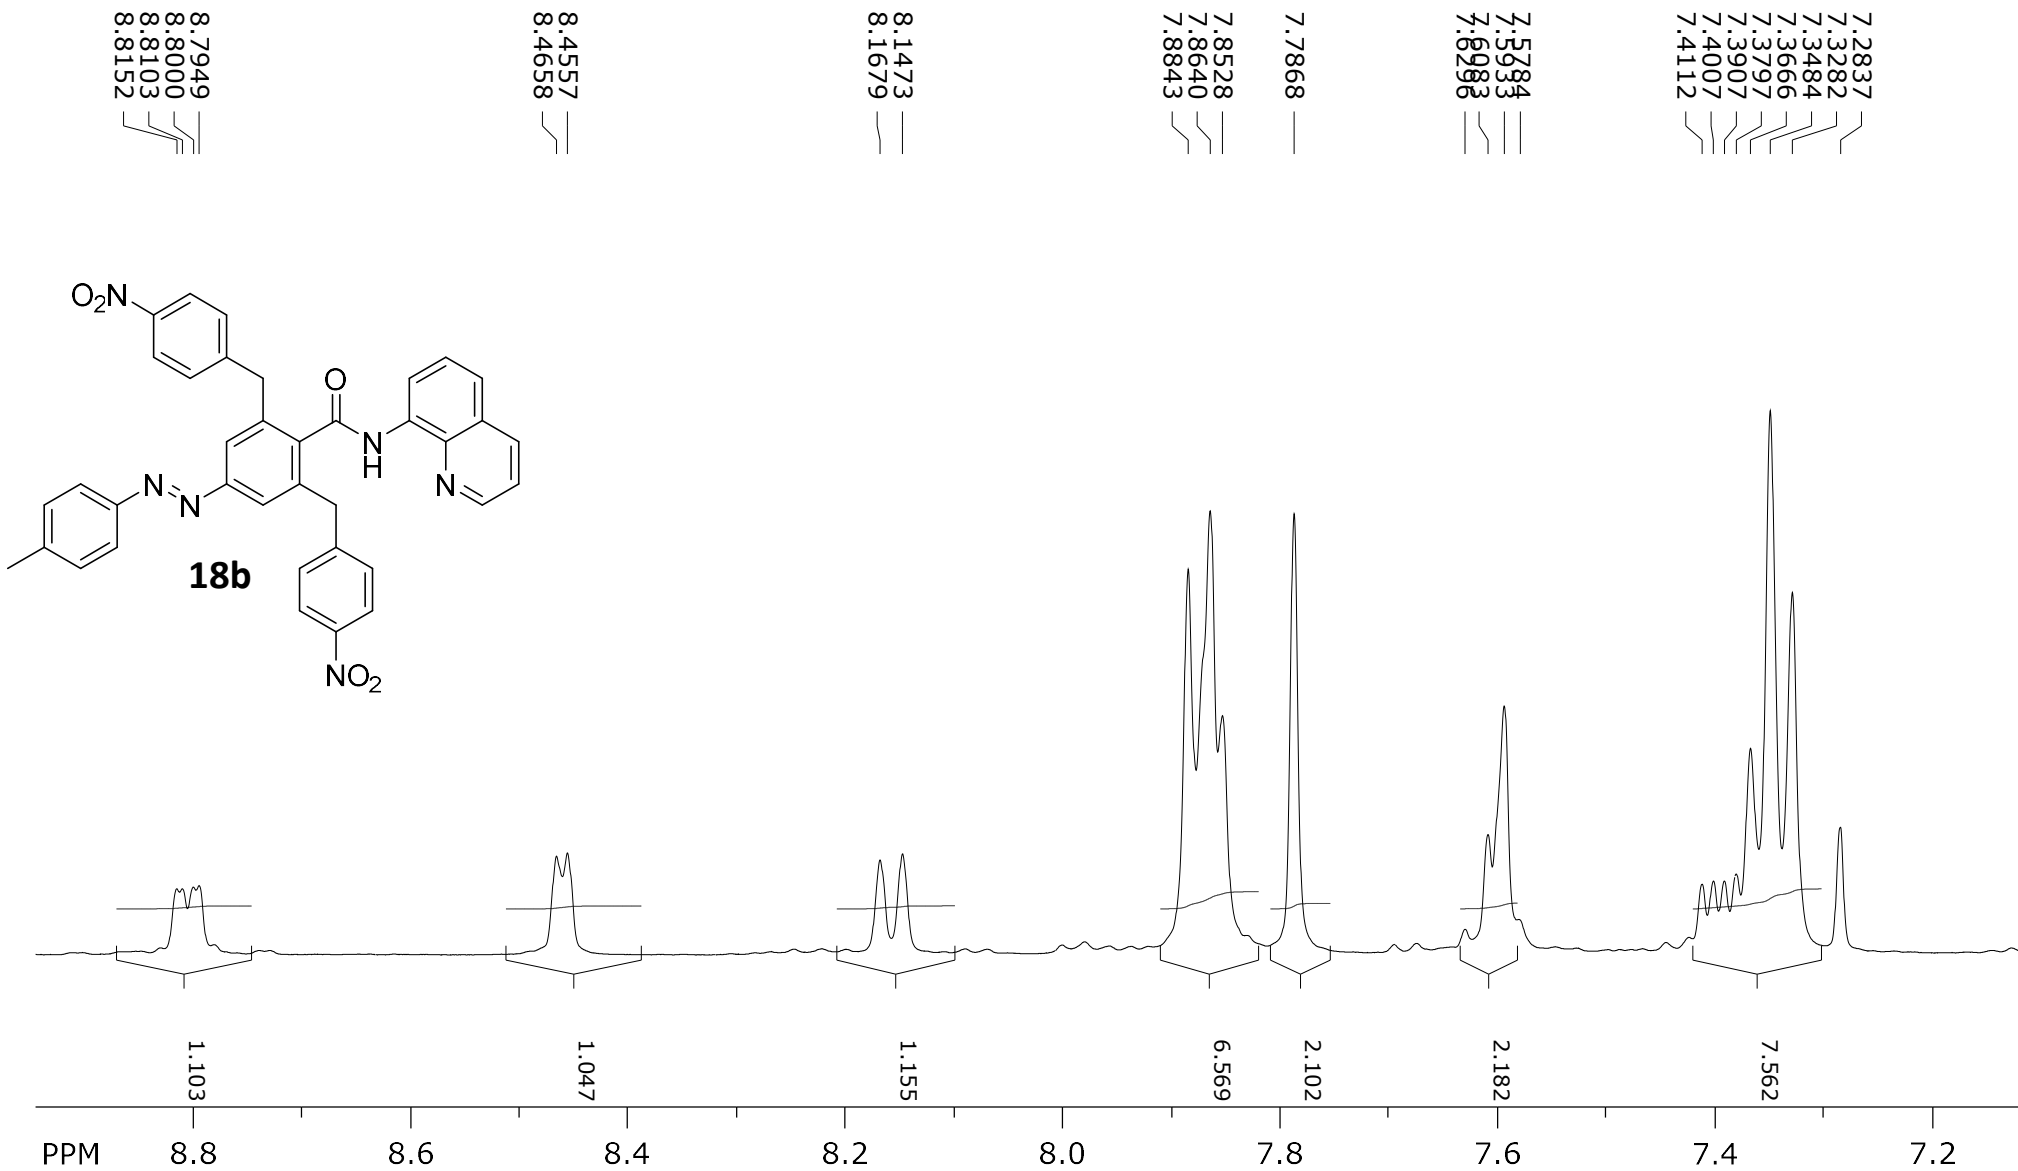

SpinWorks 4: RP-1281 B2  
C13CPD256 CDCl3 /opt/topspin3.5pl2/nmrdata nmrsu 51

166.920  
153.026  
150.593  
148.140  
147.294  
146.342  
142.604  
139.666  
138.035  
137.785  
136.384  
133.368  
129.925  
127.496  
123.872  
123.364  
123.143  
122.701  
121.921  
116.545

76.748  
77.065  
77.384

39.448

21.639

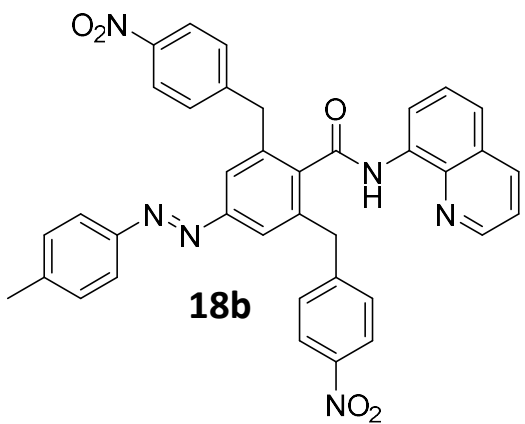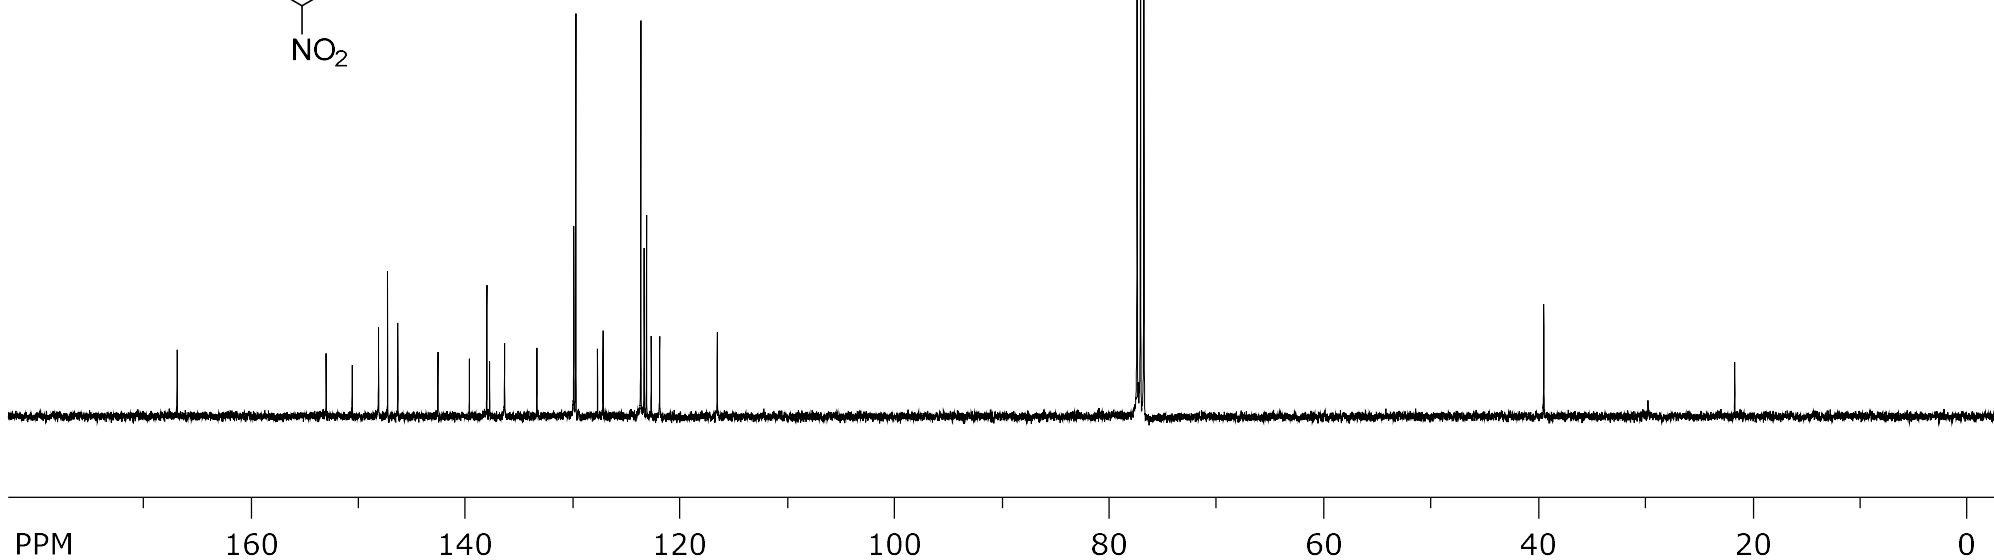

SpinWorks 4: RP-1281 B2  
C13CPD256 CDCl3 /opt/topspin3.5pl2/nmrdata nmrsu 51

153.026 —  
150.593 —  
148.140 —  
147.294 —  
146.342 —  
142.604 —  
139.666 —  
138.035 —  
137.785 —  
136.384 —  
133.368 —  
129.735 —  
129.927 —  
127.197 —  
127.716 —  
121.921 —  
122.701 —  
123.143 —  
123.364 —  
123.672 —  
116.545 —

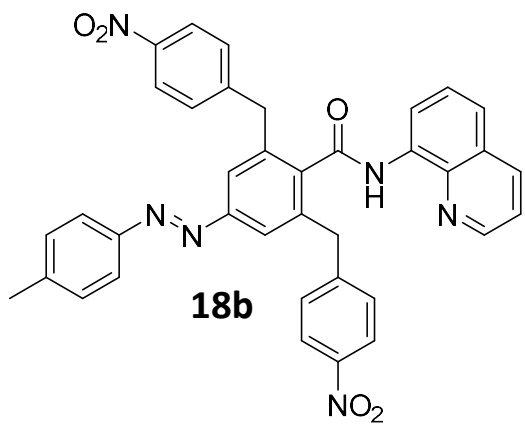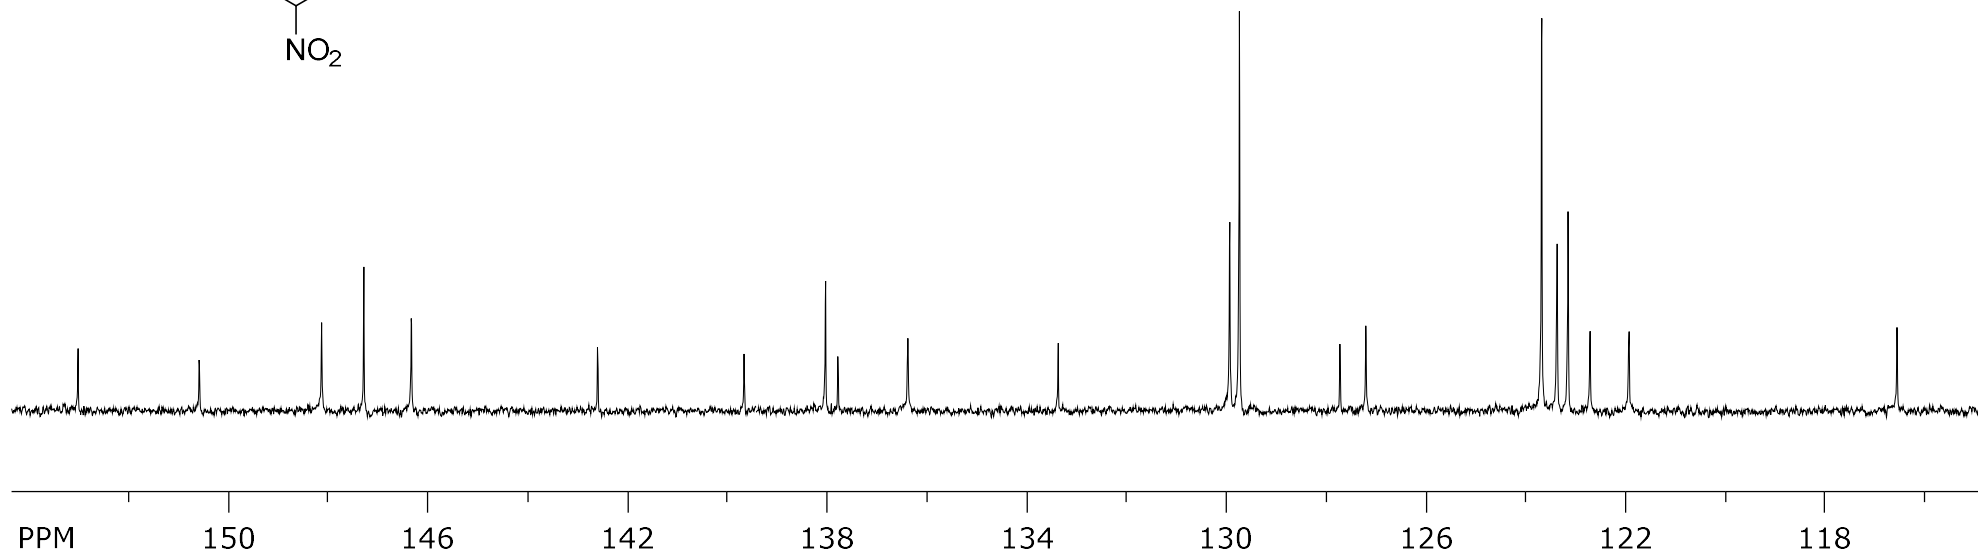

SpinWorks 4: DB 668 A  
PROTON CDCl3 /opt/topspin3.5pl2/nmrdata nmrsu 58

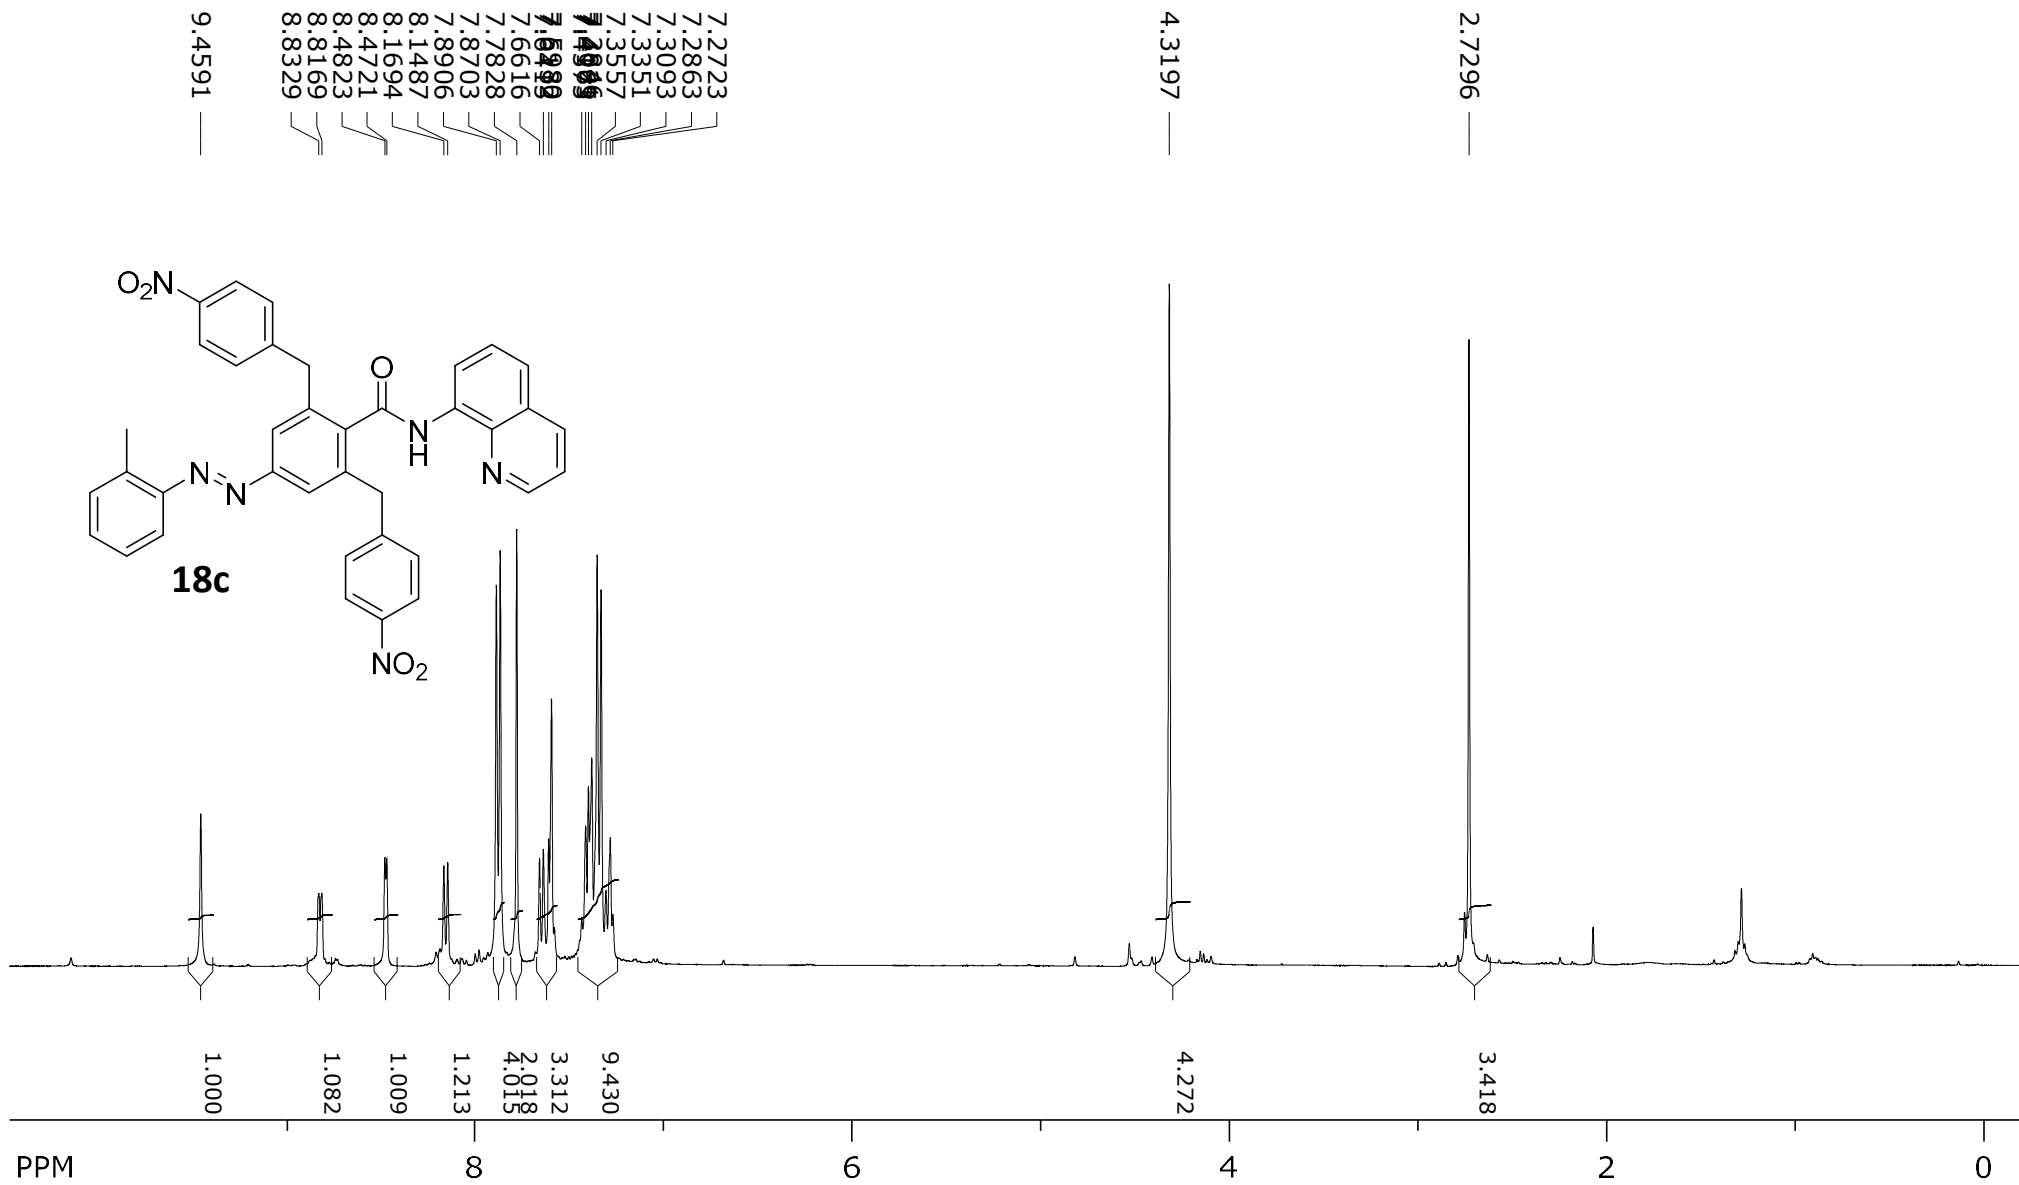

SpinWorks 4: DB 668 A  
PROTON CDCl3 /opt/topspin3.5pl2/nmrdata nmrsu 58

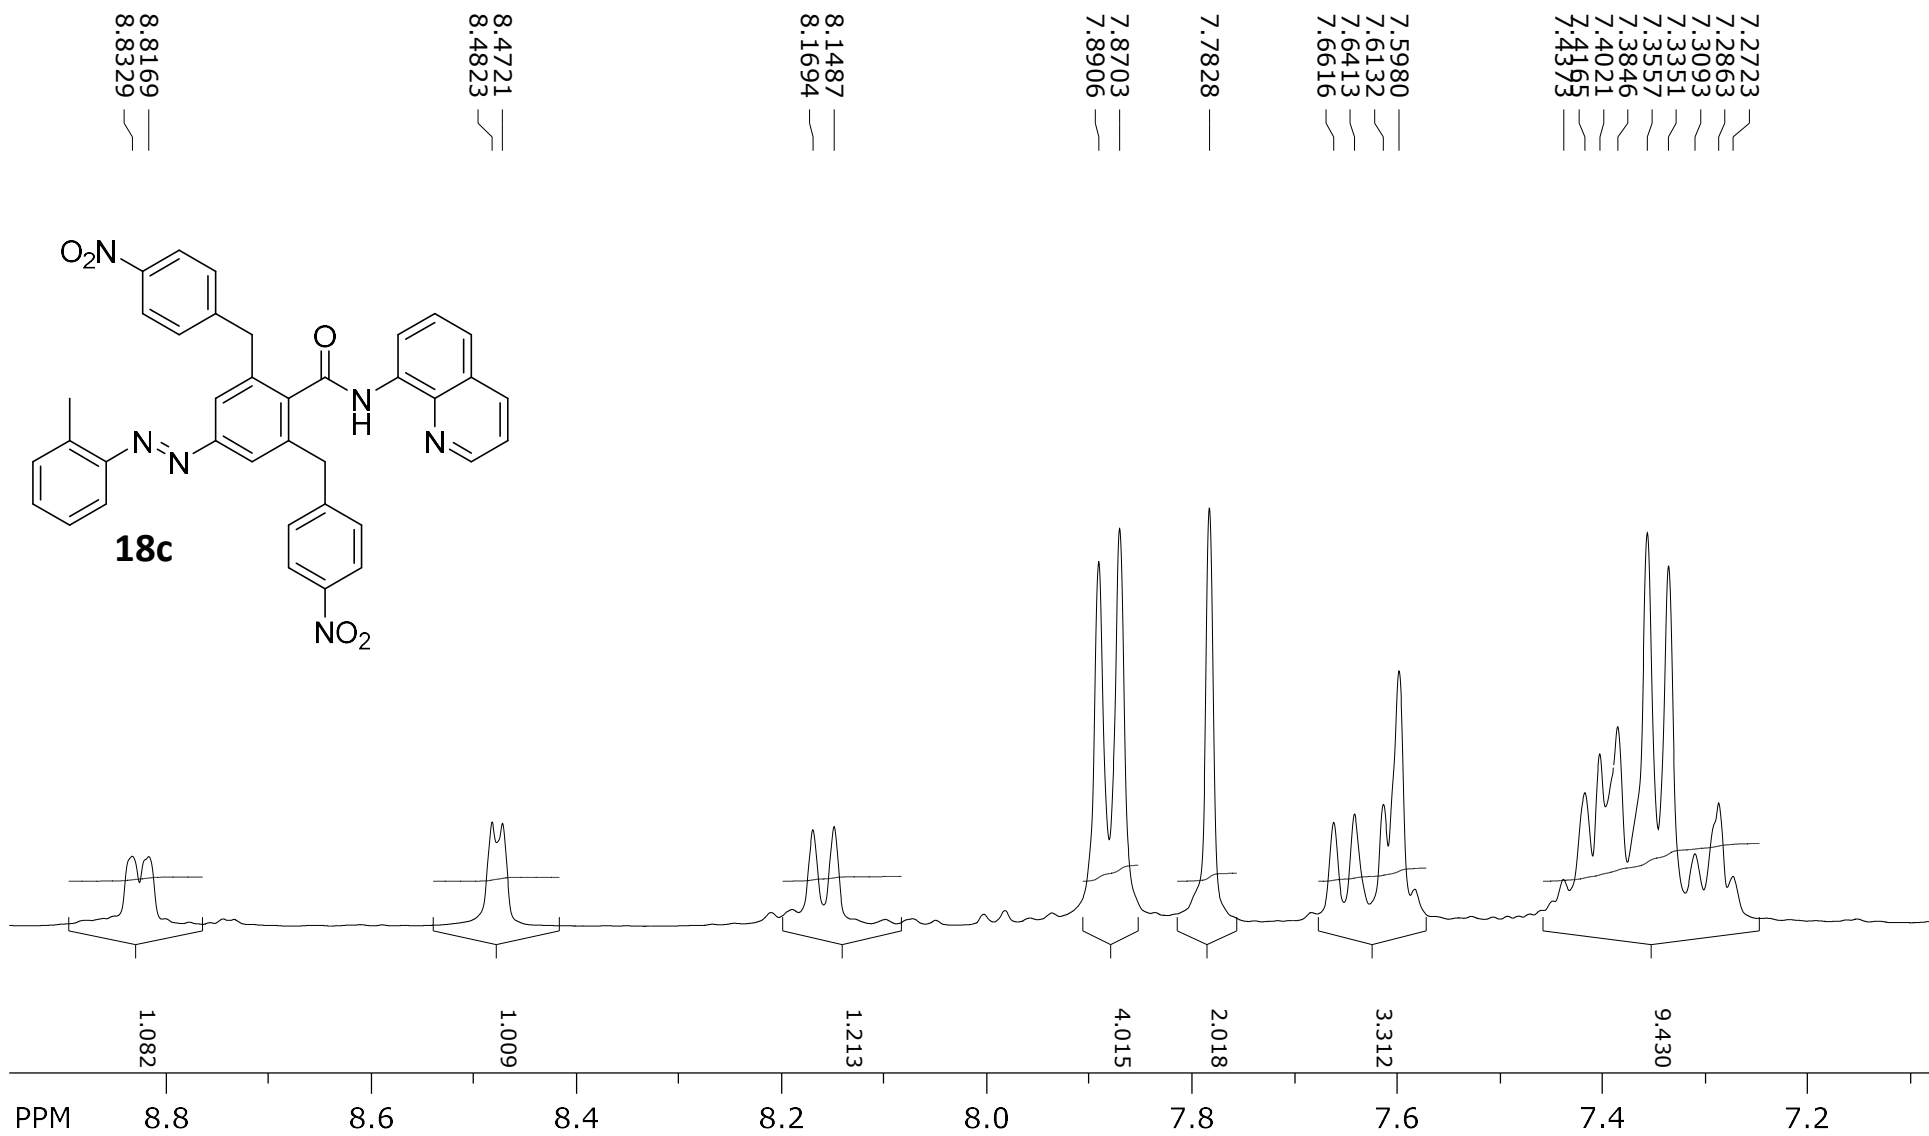



SpinWorks 4: DB 668 A  
C13CPD256 CDCl3 /opt/topspin3.5pl2/nmrdata nmrsu 58

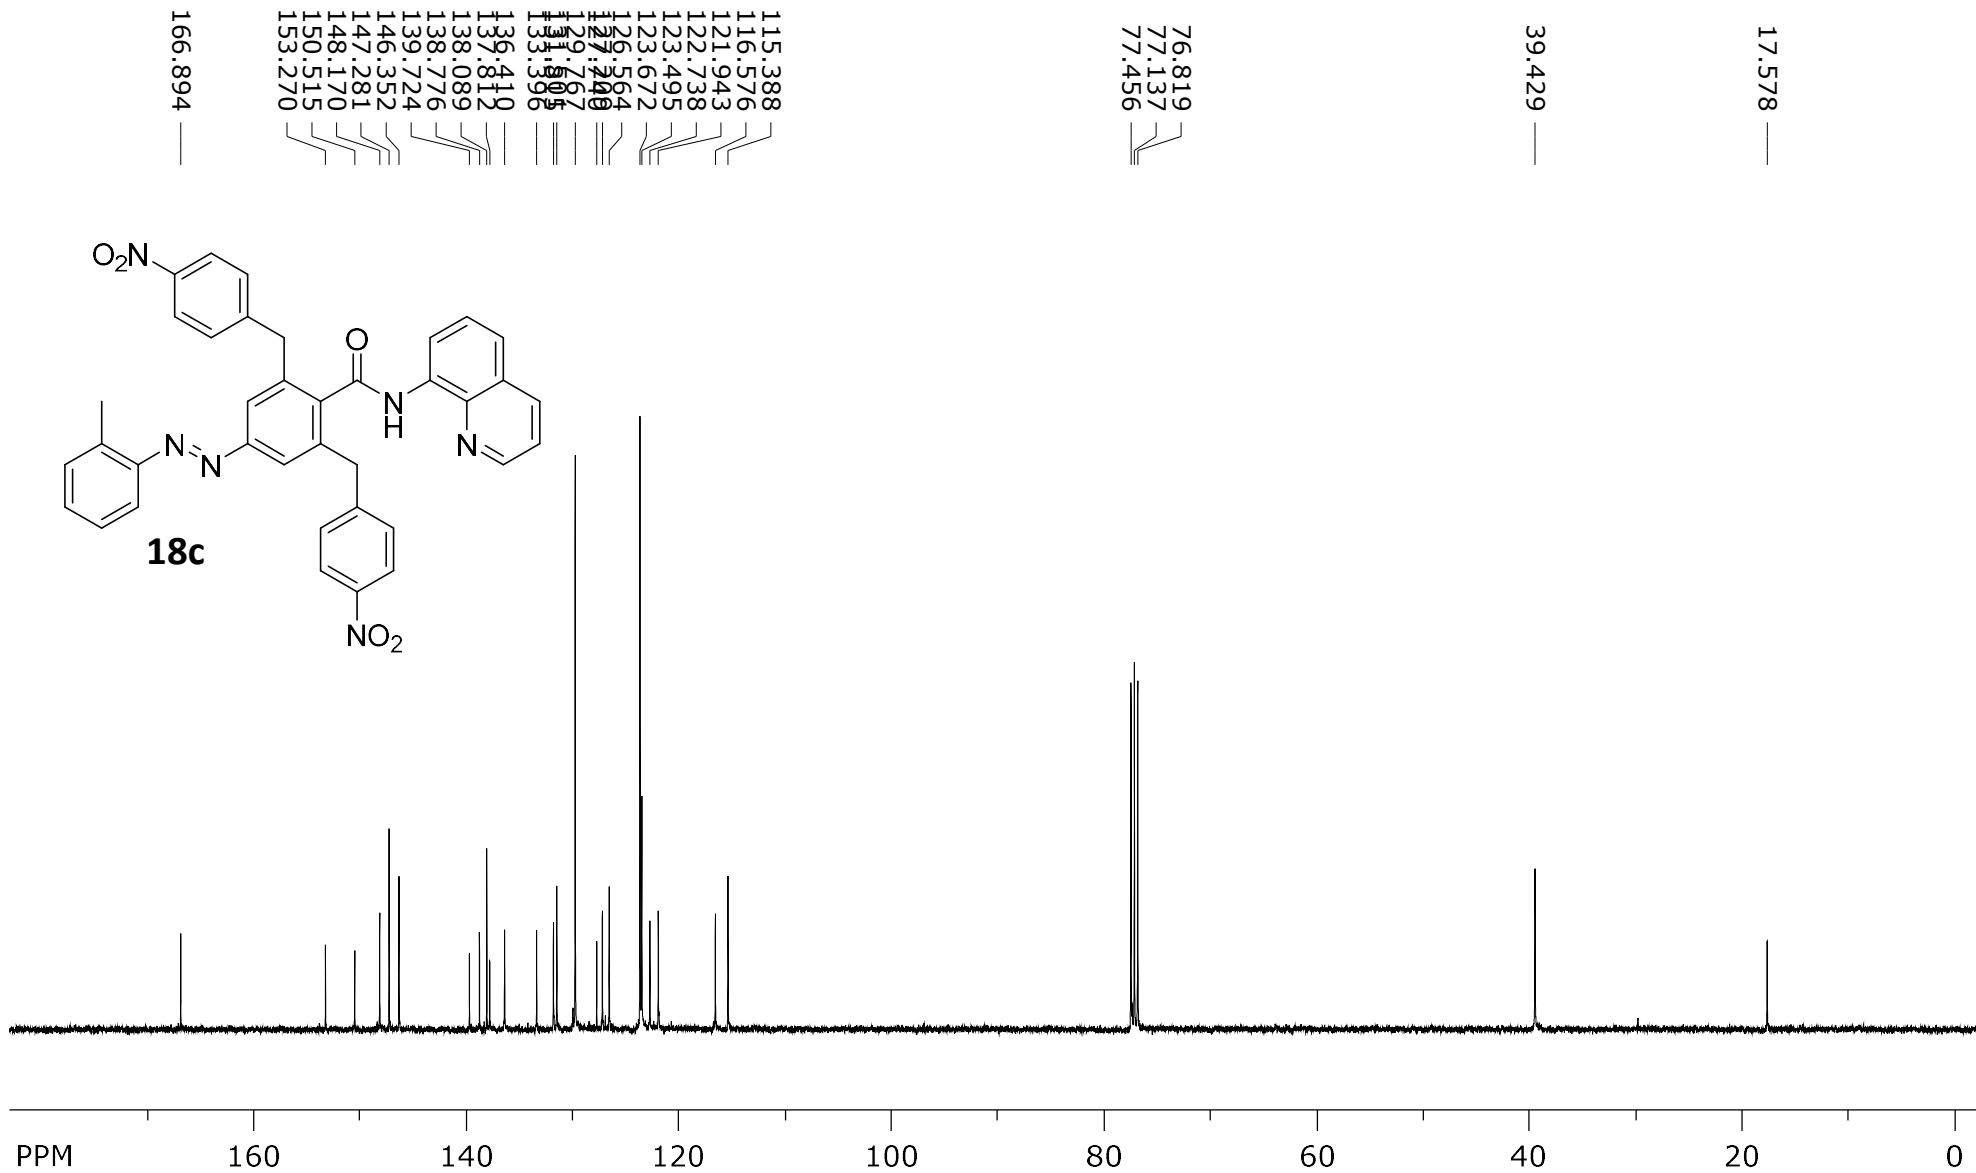

SpinWorks 4: DB 668 A  
C13CPD256 CDCl3 /opt/topspin3.5pl2/nmrdata nmrsu 58

153.270 —  
150.515 —  
148.170 —  
147.281 —  
146.352 —  
139.724 —  
138.776 —  
138.089 —  
137.812 —  
136.410 —  
133.396 —  
131.815 —  
131.501 —  
129.767 —  
127.740 —  
127.209 —  
126.564 —  
123.672 —  
123.495 —  
122.738 —  
121.943 —  
116.576 —  
115.388 —

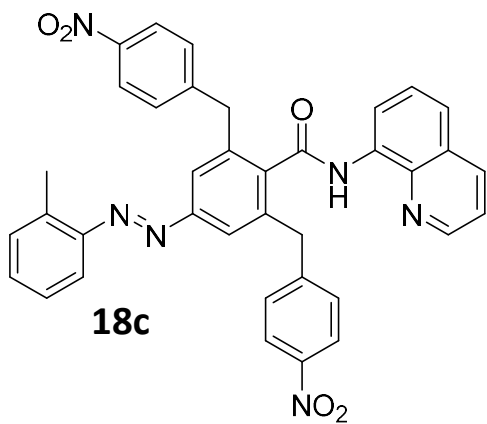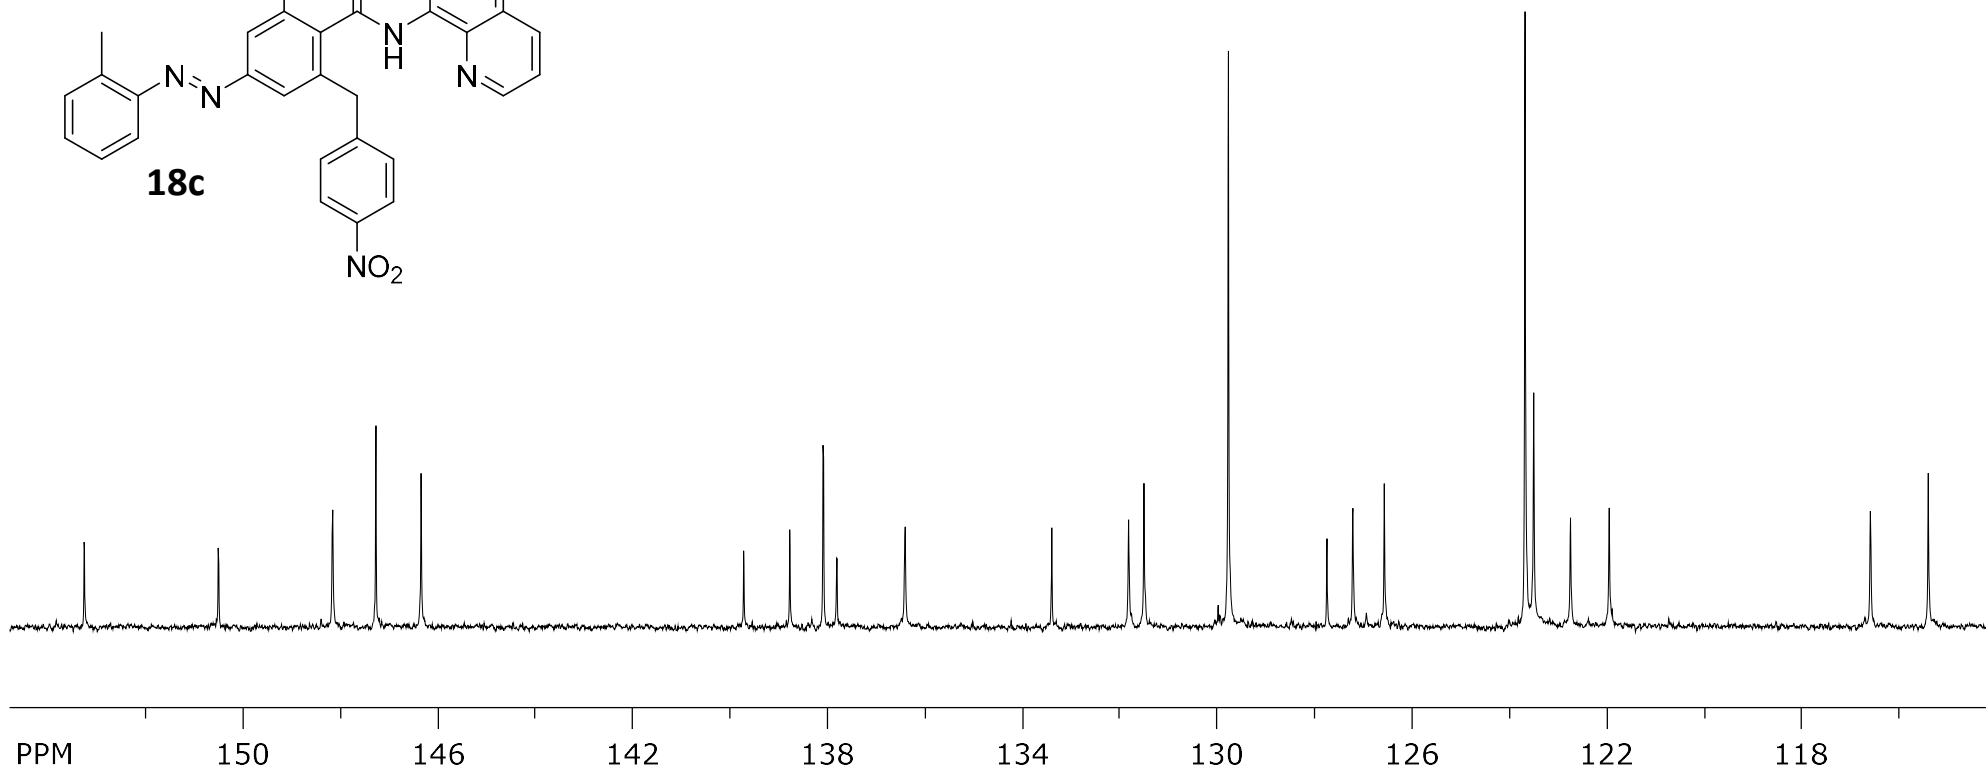

SpinWorks 4: RP 1526  
PROTON CDCl3 /opt/topspin3.5pl2/nmrdata nmrsu 51

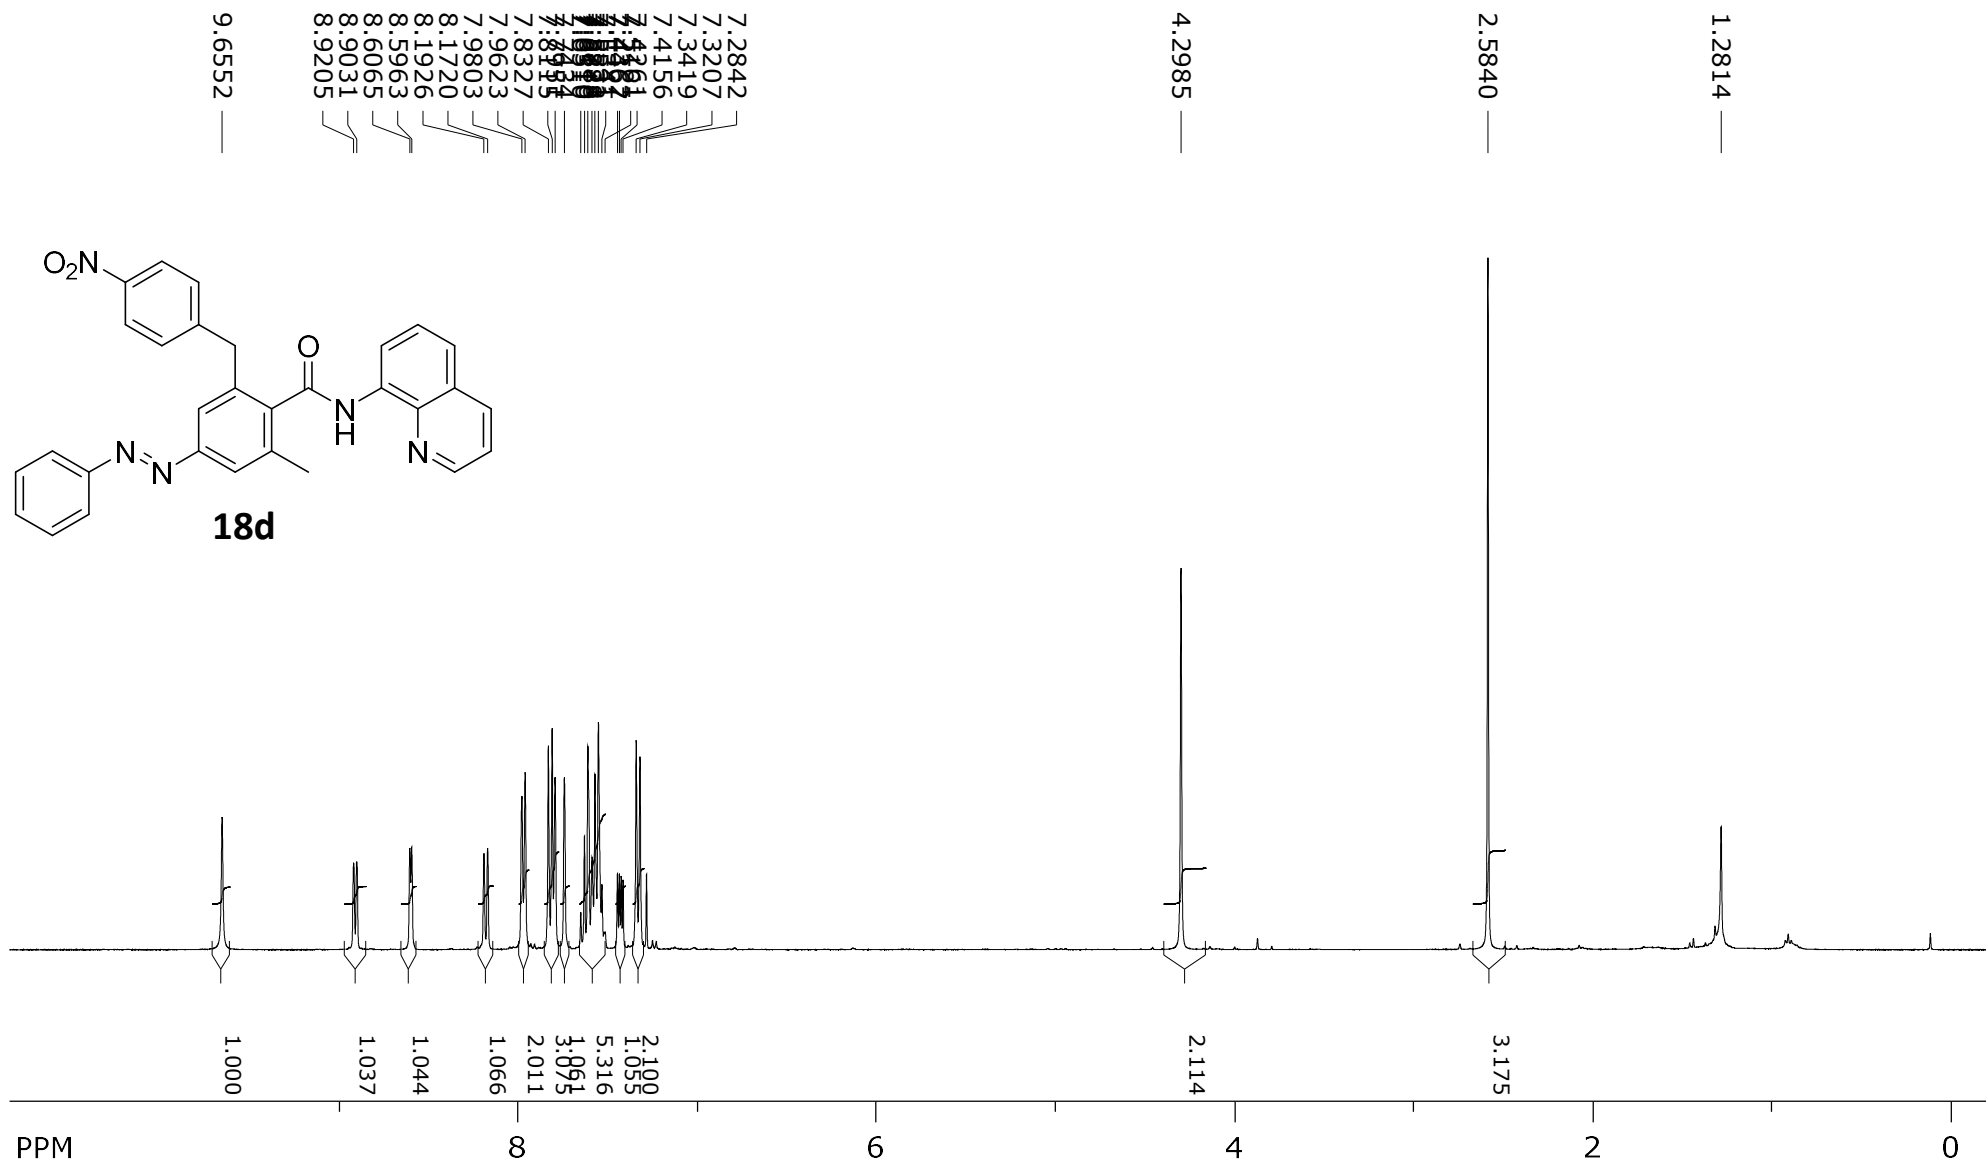

SpinWorks 4: RP 1526  
PROTON CDCl3 /opt/topspin3.5pl2/nmrdata nmrsu 51

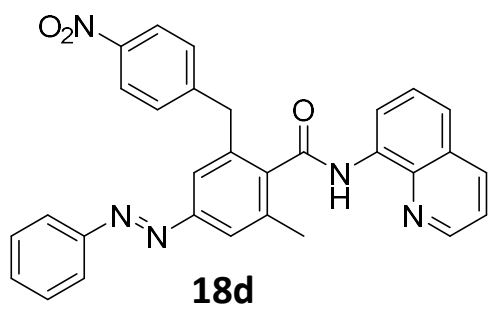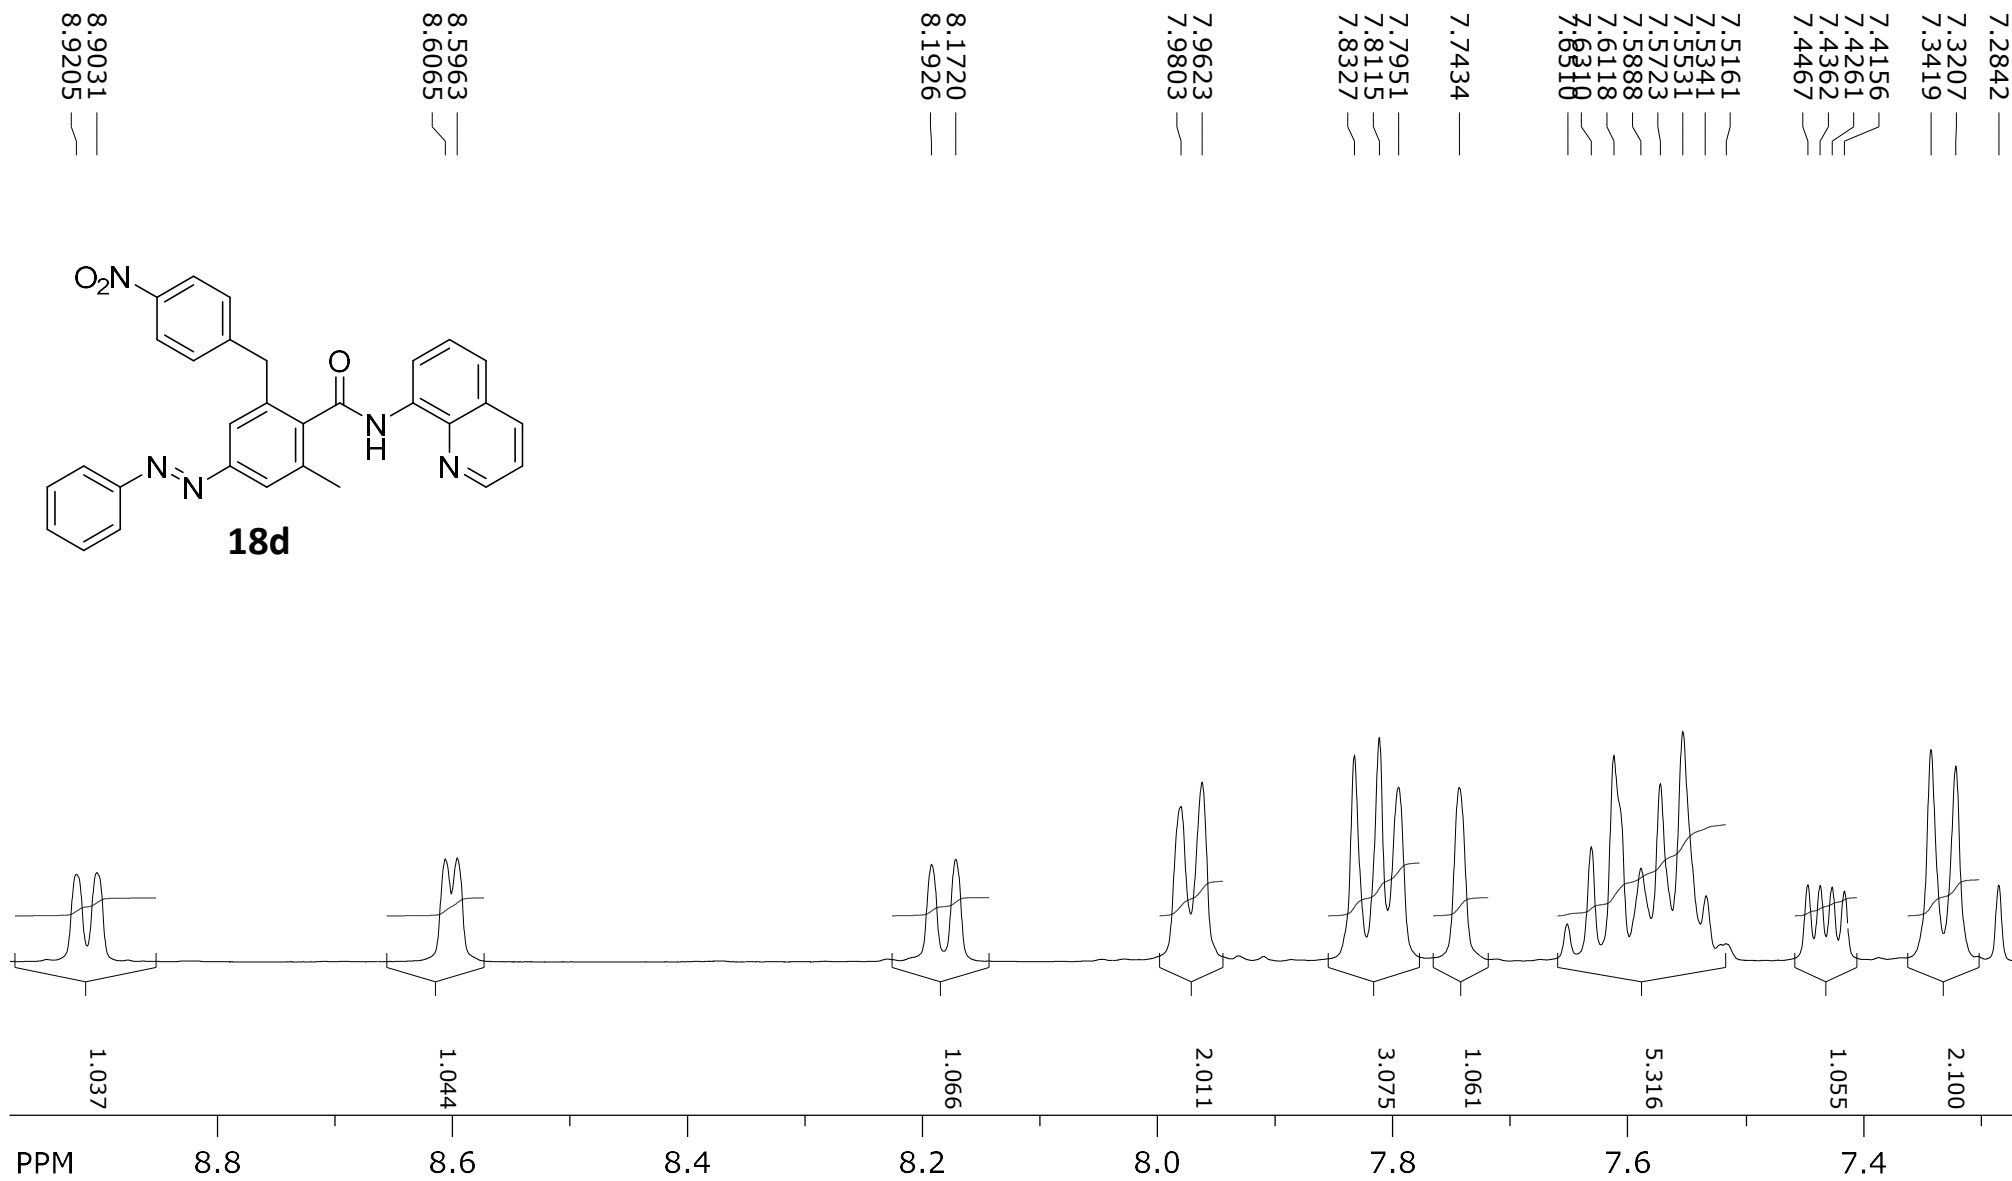

SpinWorks 4: RP 1526  
C13CPD CDCl3 /opt/topspin3.5pl2/nmrdata nmrsu 51

167.590  
152.723  
152.549  
148.260  
147.704  
146.198  
140.017  
138.118  
137.488  
136.611  
136.404  
133.792  
131.541  
129.710  
129.594  
123.045  
122.703  
122.465  
121.853  
116.729

76.763  
77.081  
77.398

39.469

19.707

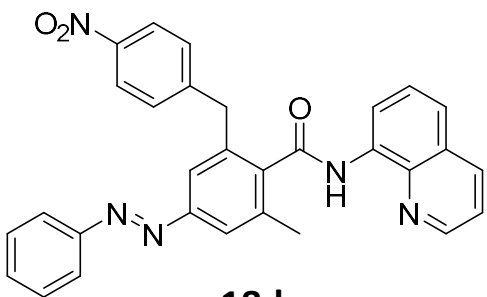

**18d**

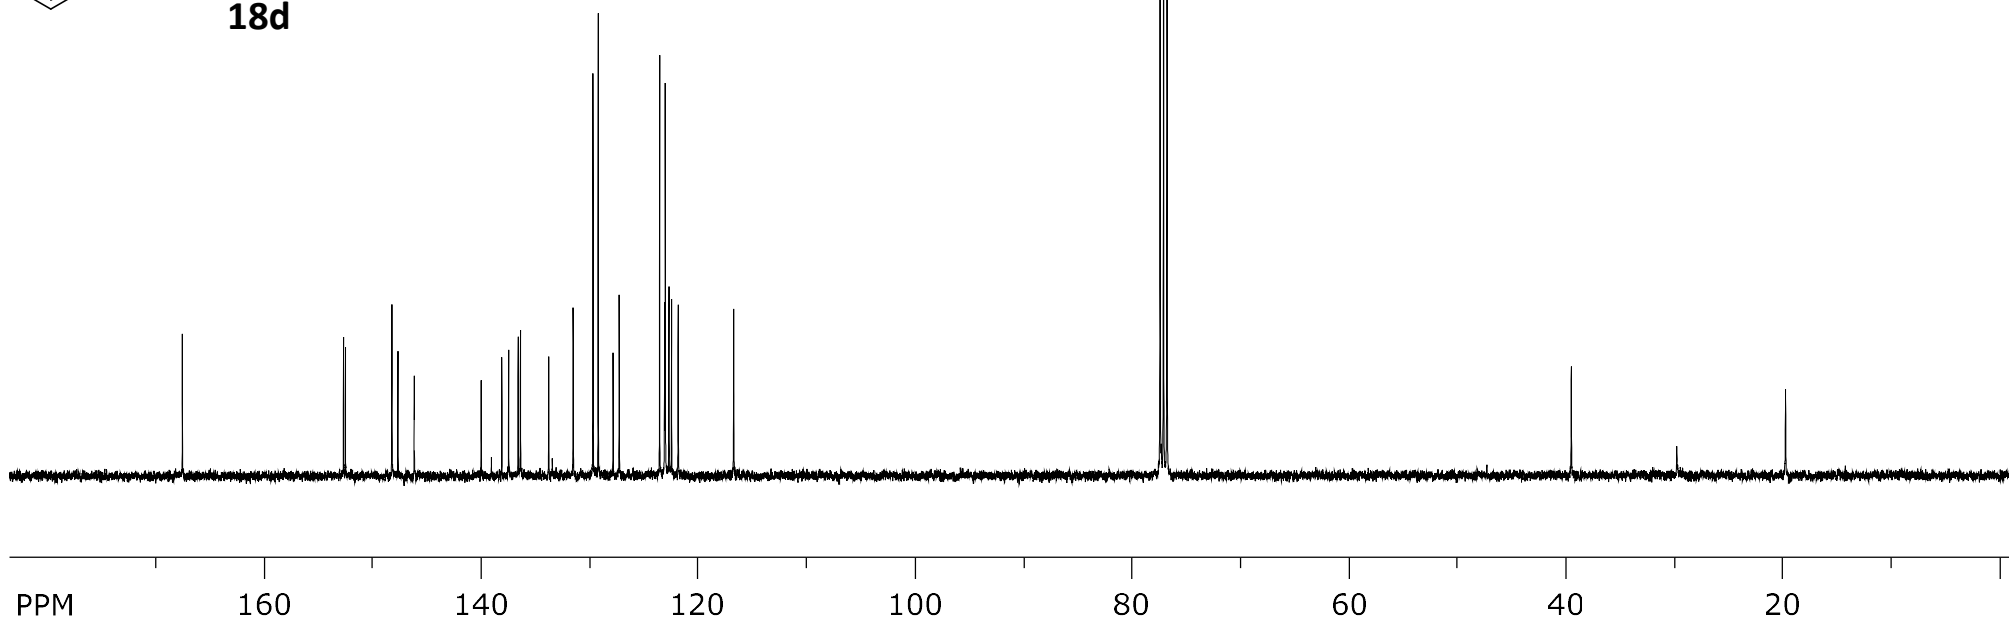

SpinWorks 4: RP 1526  
C13CPD CDC13 /opt/topspin3.5pl2/nmrdata nmrsu 51

167.590 —  
152.549 —  
152.723 —  
148.260 —  
147.704 —  
146.198 —  
140.017 —  
138.118 —  
137.488 —  
136.404 —  
133.792 —  
131.541 —  
129.712 —  
129.230 —  
127.855 —  
127.294 —  
123.564 —  
123.109 —  
123.045 —  
122.703 —  
122.465 —  
121.853 —  
116.729 —

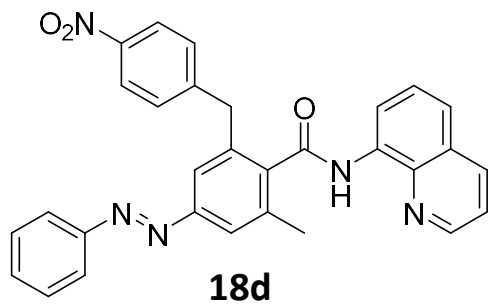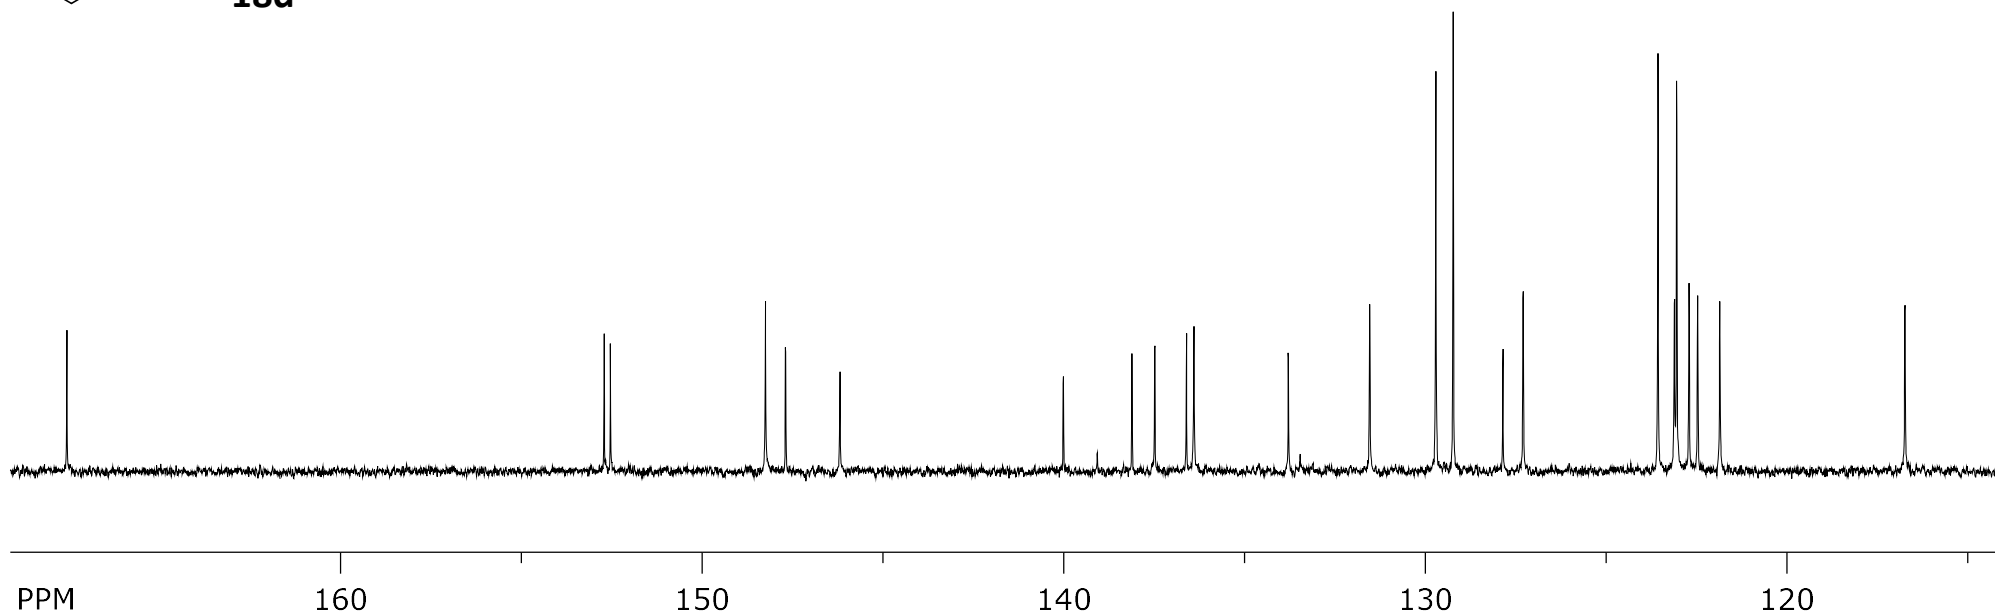

SpinWorks 4: SAB120301  
1H\_8scan CDCl3 {D:\Spectra} nmr 1

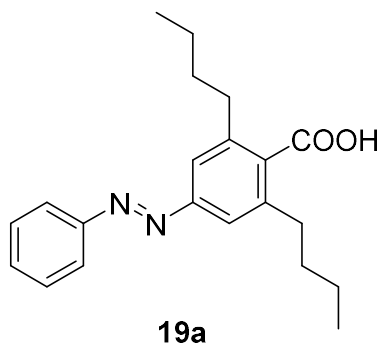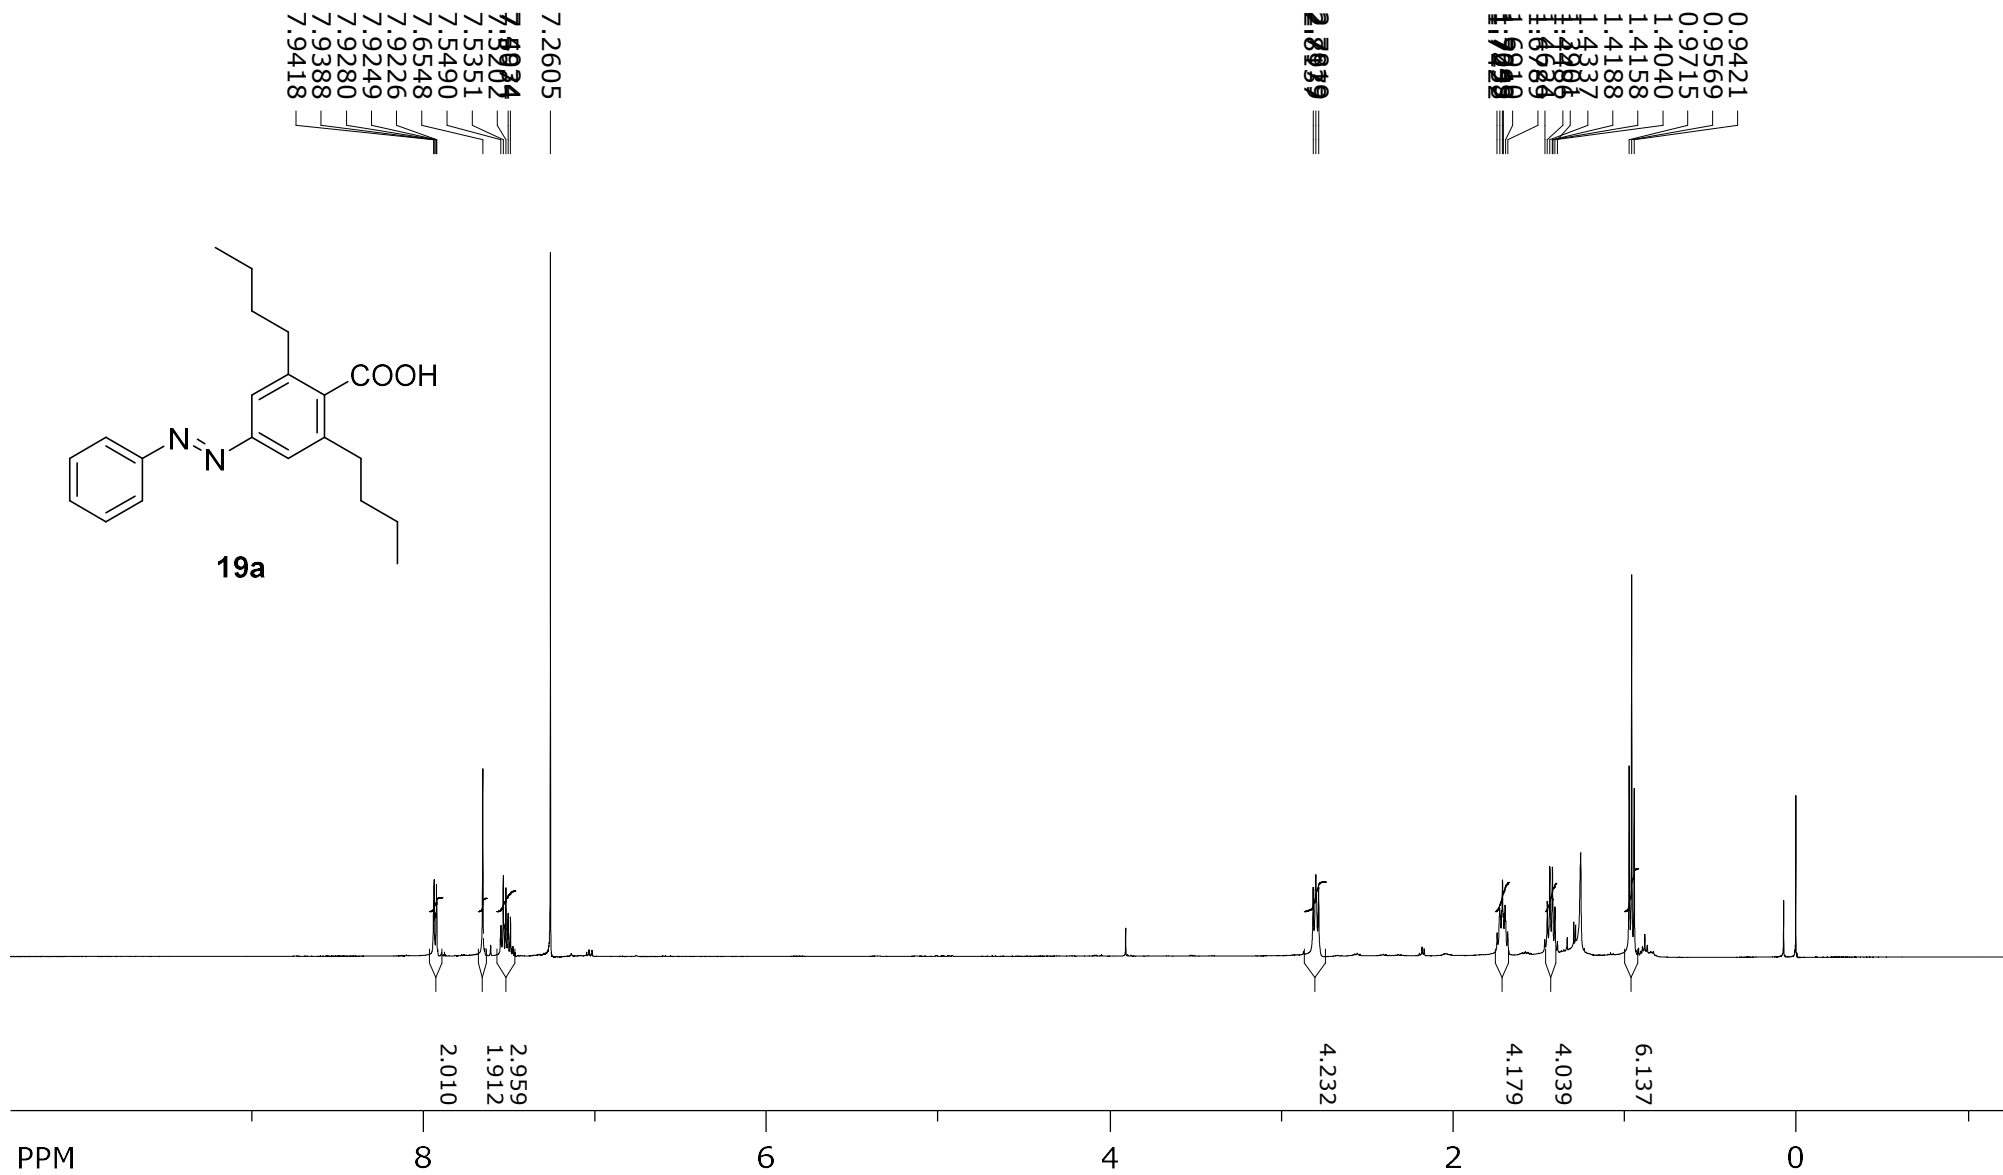

SpinWorks 4: SAB120301  
1H\_8scan CDCl3 {D:\Spectra} nmr 1

7.9226  
7.9249  
7.9280  
7.9388  
7.9418

7.6548

7.4934  
7.5074  
7.5202  
7.5351  
7.5490

7.2605

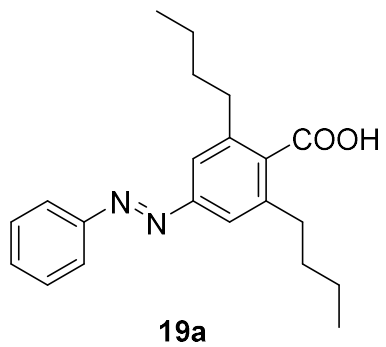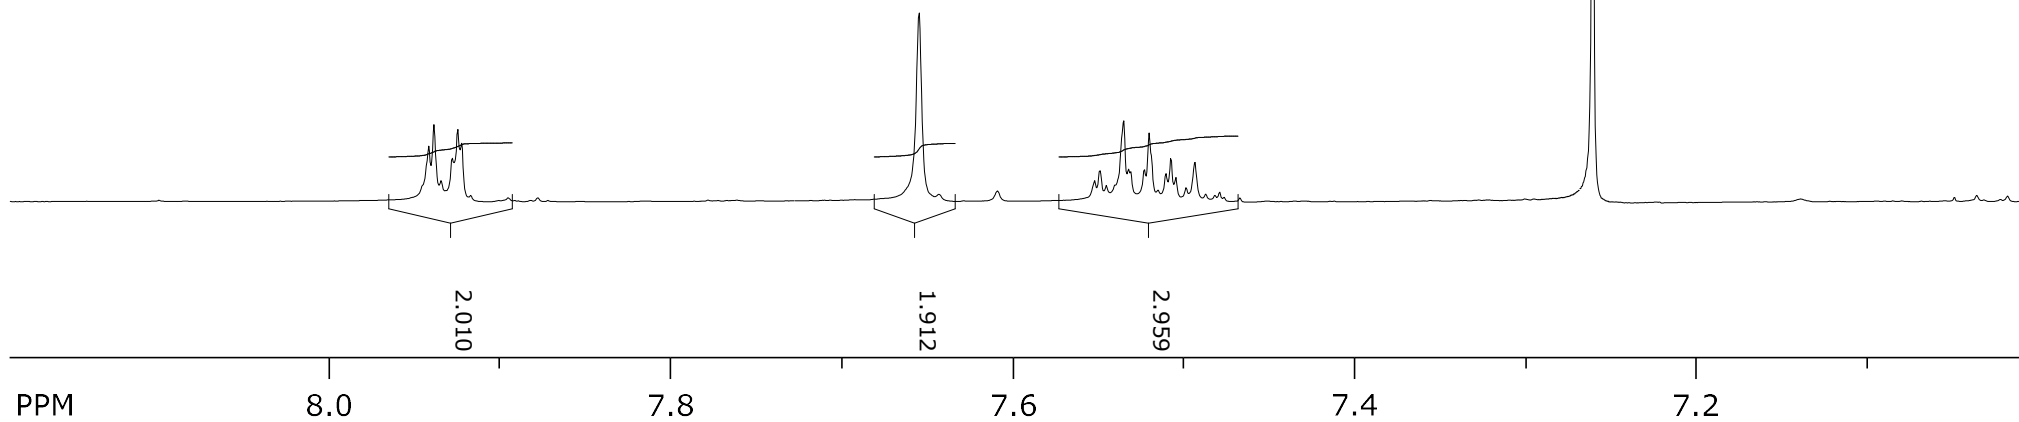



SpinWorks 4: SAB120301  
1H\_8scan CDCl3 {D:\Spectra} nmr 1

2.7819  
2.7979  
2.8137

1.6789  
1.6910  
1.7043  
1.7099  
1.7258  
1.7422

1.3901  
1.4040  
1.4188  
1.4337  
1.4486  
1.4624

0.9421  
0.9569  
0.9715

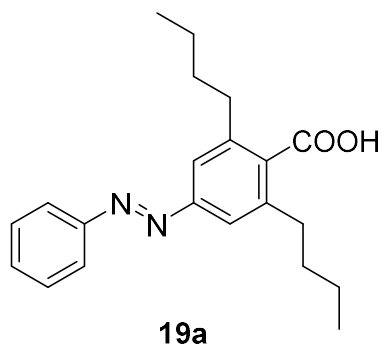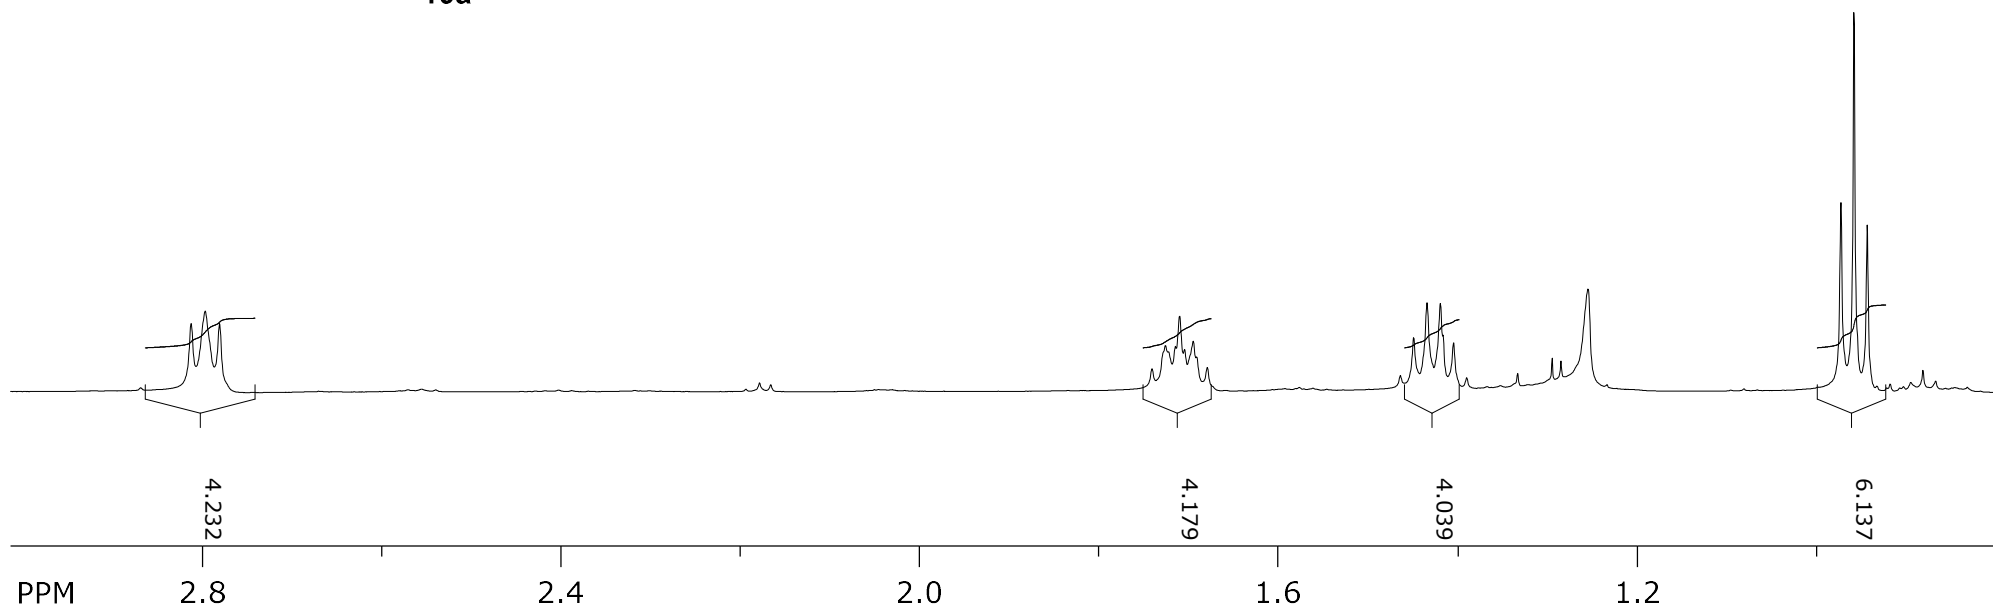

SpinWorks 4: RP 1497 FIN  
C13CPD CDCl3 /opt/topspin3.5pl2/nmrdata nmrsu 52

175.111 —  
152.649 —  
152.901 —  
141.171 —  
129.162 —  
131.310 —  
134.448 —  
121.254 —  
122.961 —  
76.739 —  
77.056 —  
77.374 —  
33.506 —  
33.663 —  
22.680 —  
13.938 —  
1.059 —

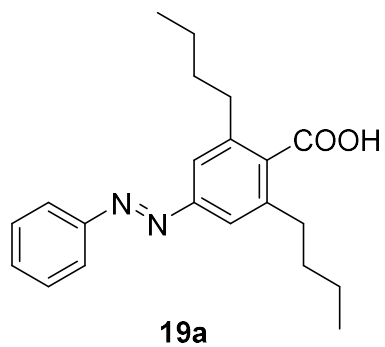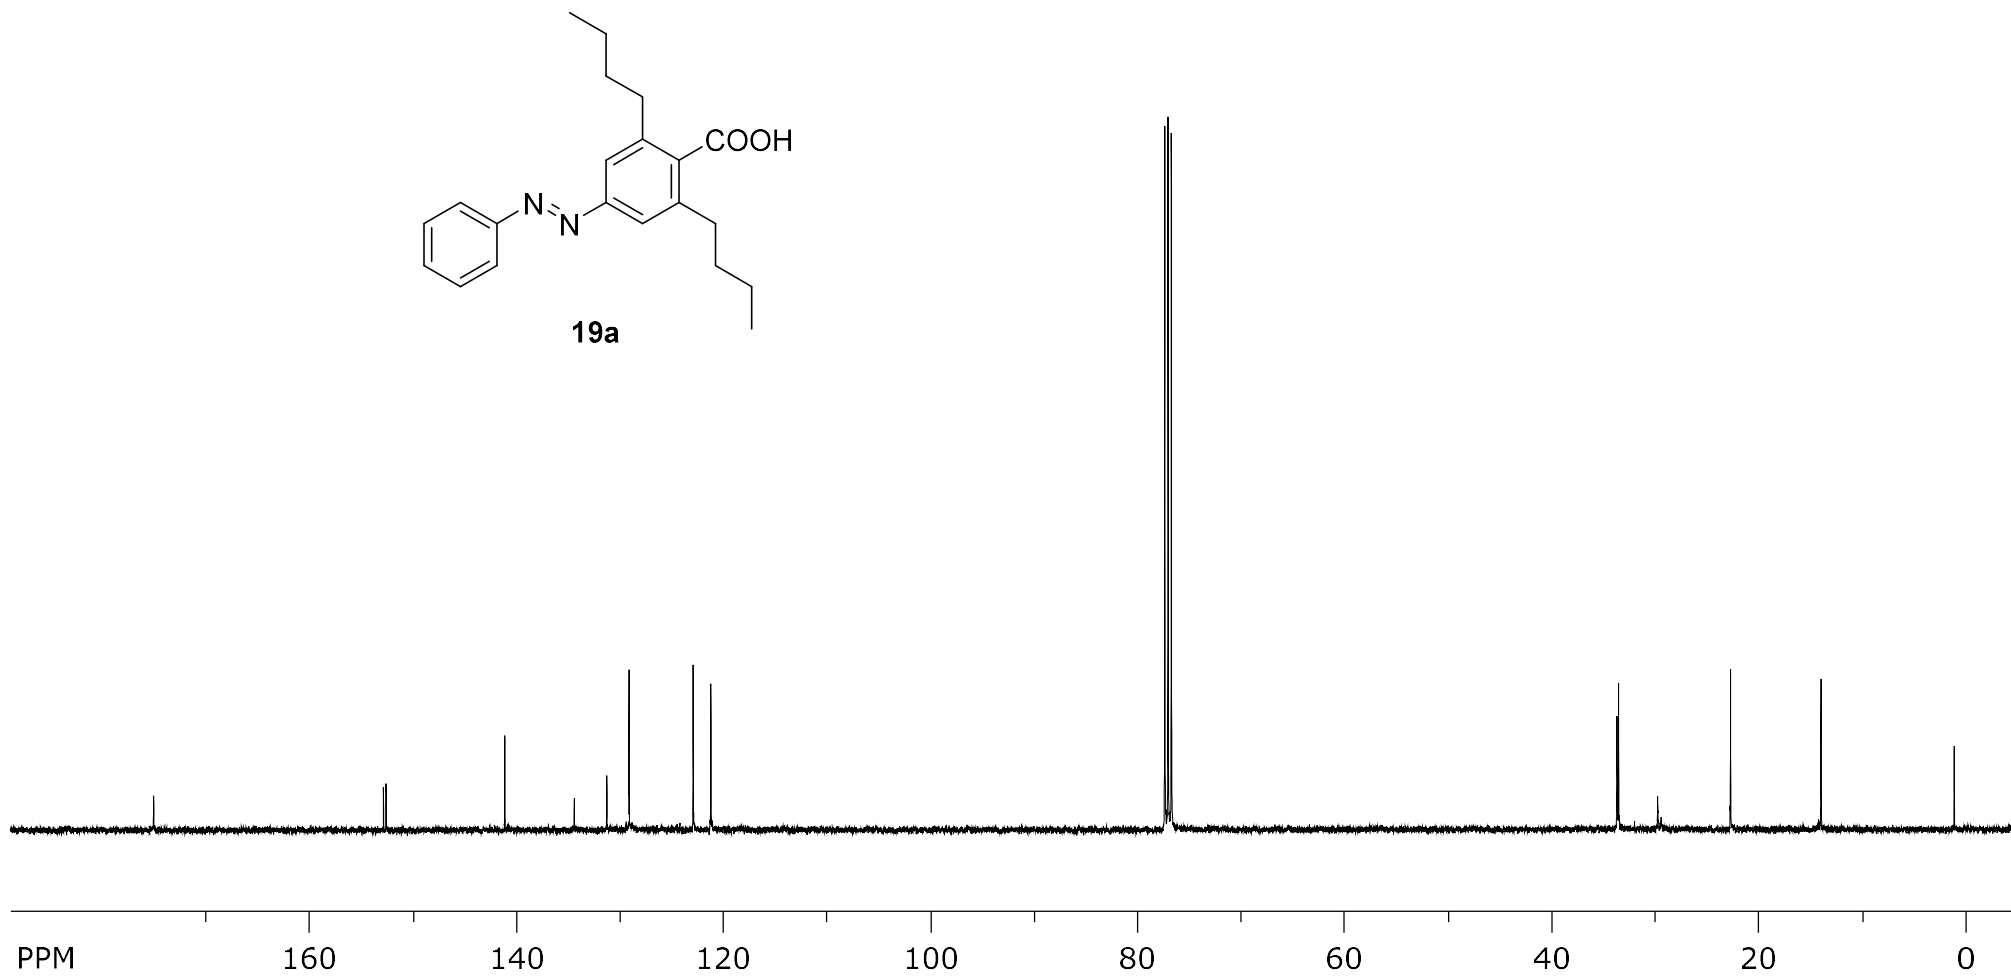

SpinWorks 4: RP 1309  
PROTON DMSO /opt/topspin3.5pl2/nmrdata nmrsu 35

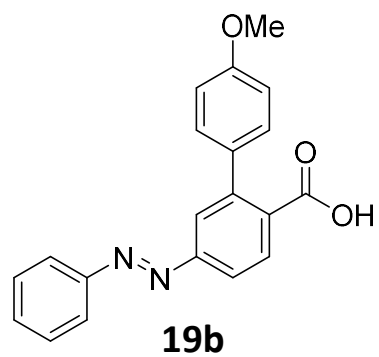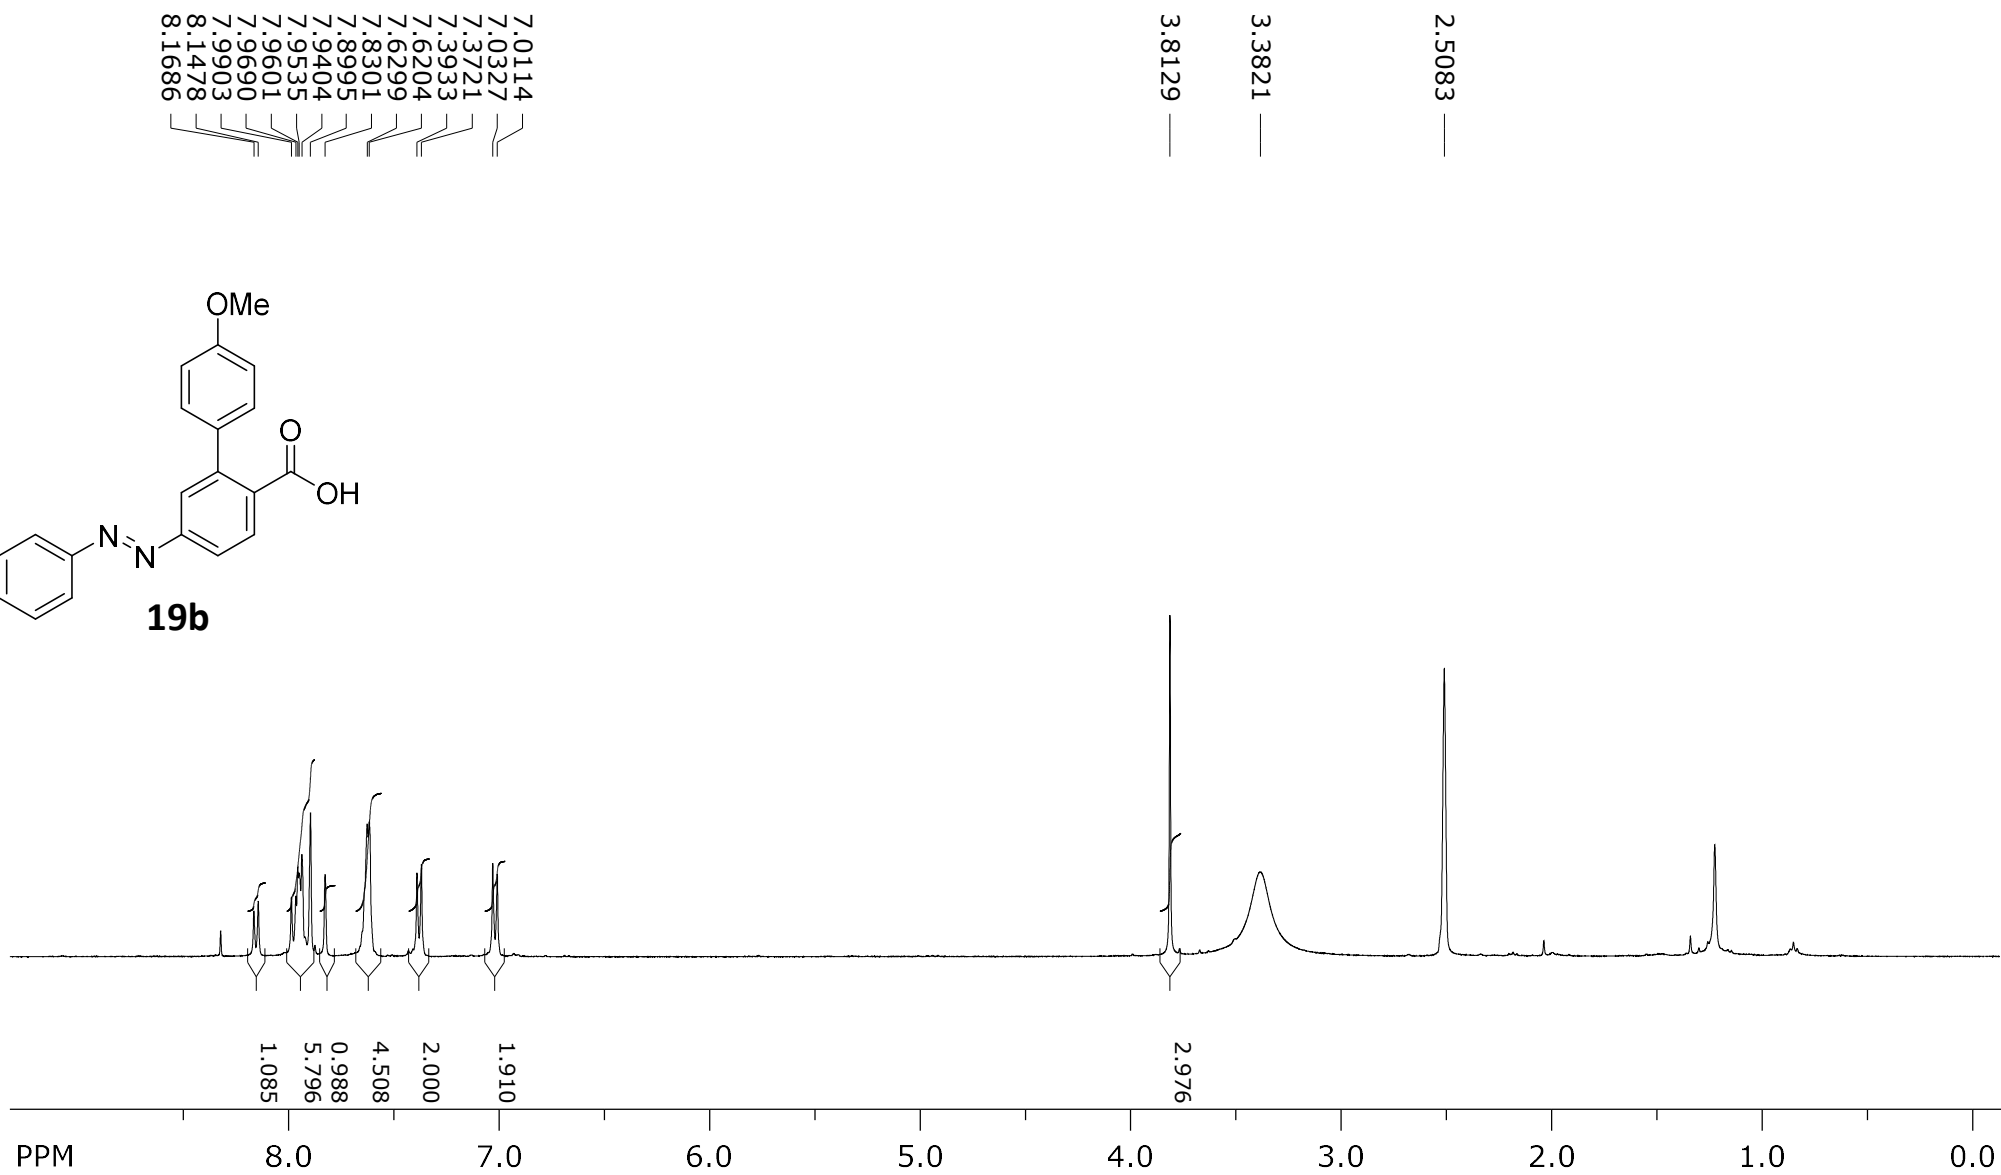

SpinWorks 4: RP 1309  
C13CPD DMSO /opt/topspin3.5pl2/nmrdata nmrsu 35

169.847 —  
159.407 —  
152.310 —  
152.975 —  
142.147 —  
132.706 —  
132.694 —  
132.597 —  
131.127 —  
130.809 —  
130.989 —  
121.014 —  
121.938 —  
114.255 —

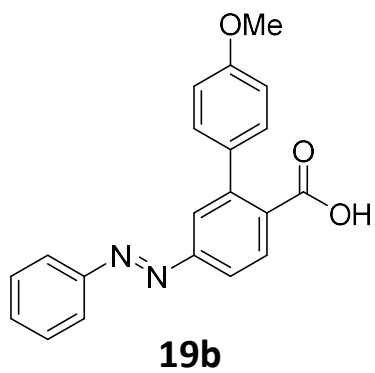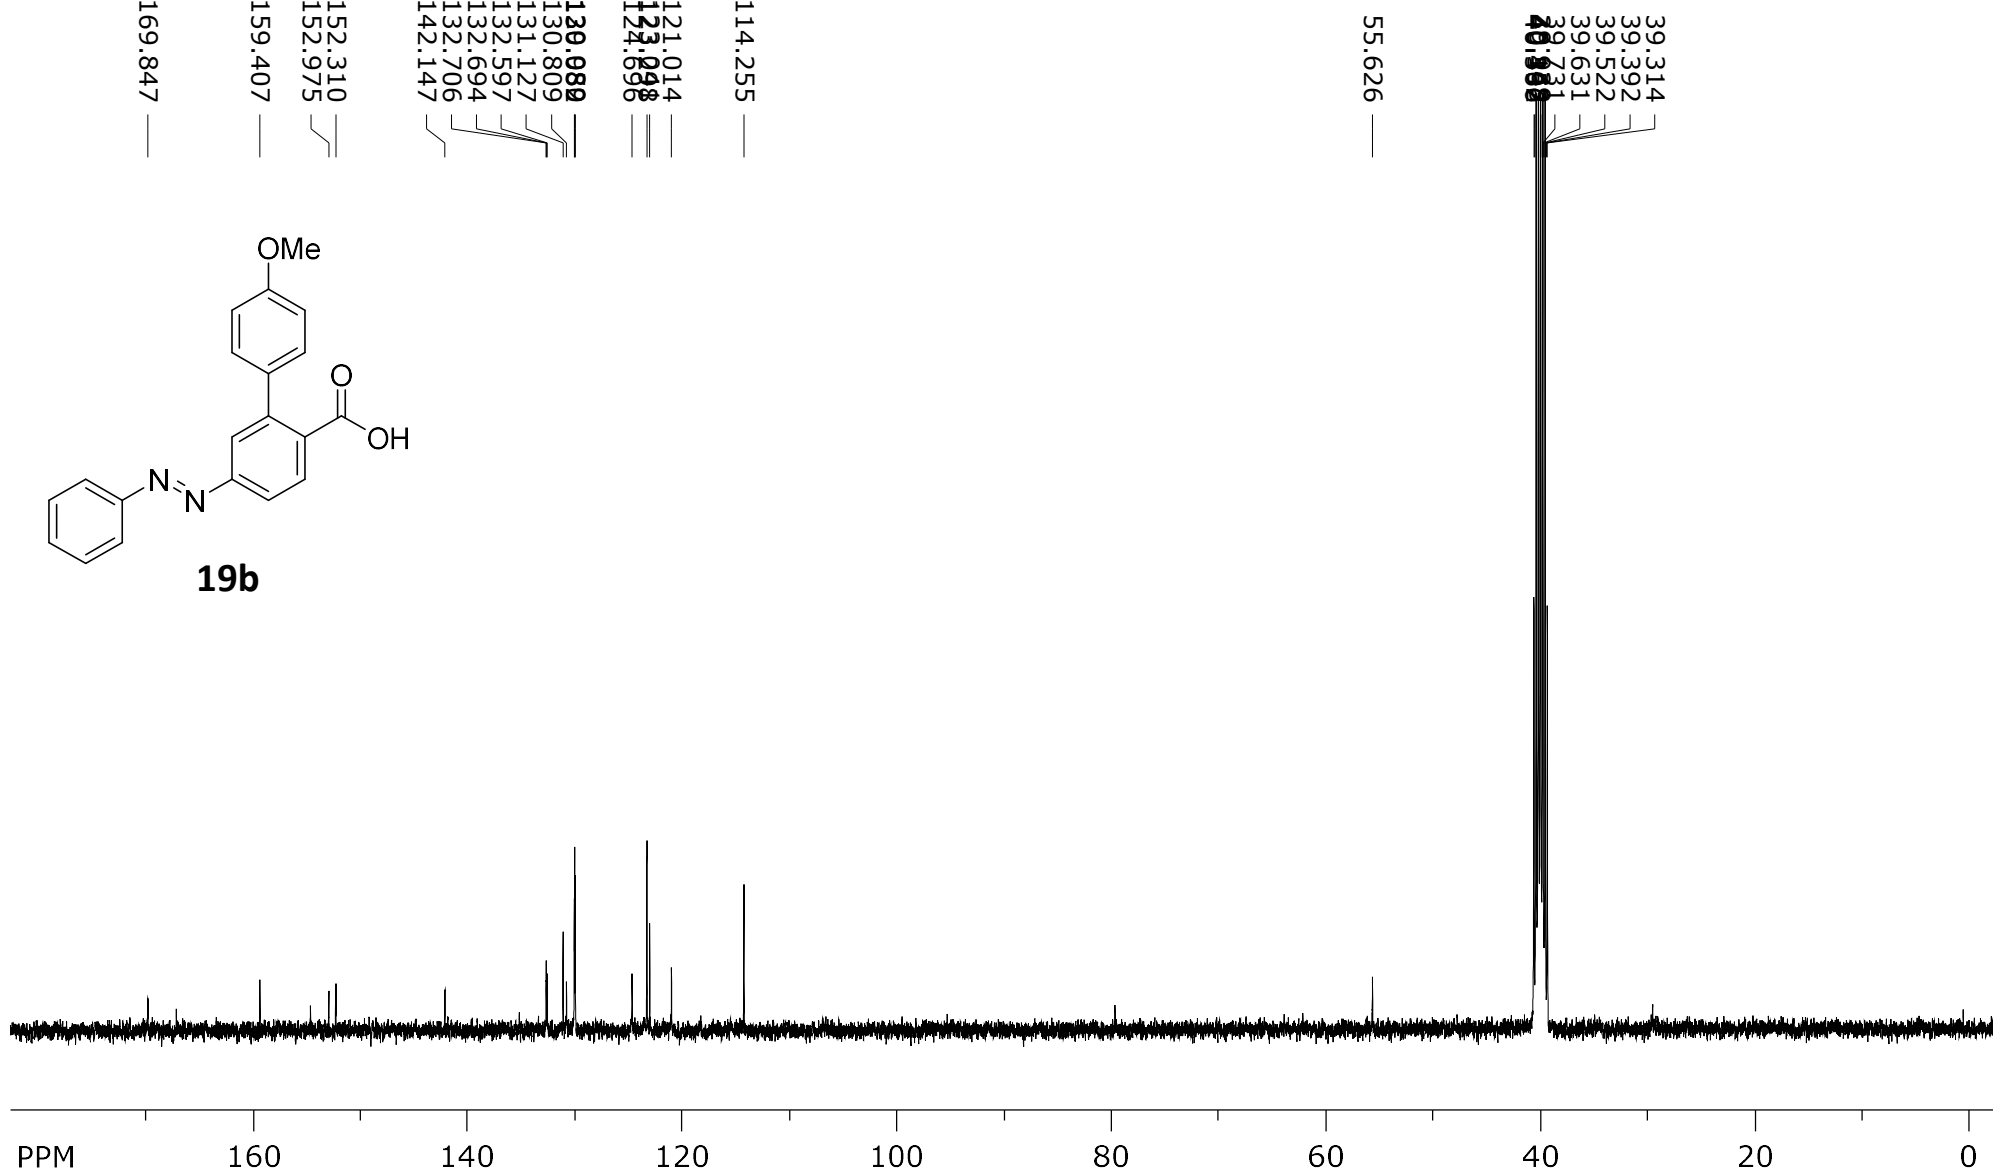

SpinWorks 4: RP 1309  
C13CPD DMSO /opt/topspin3.5pl2/nmrdata nmrsu 35

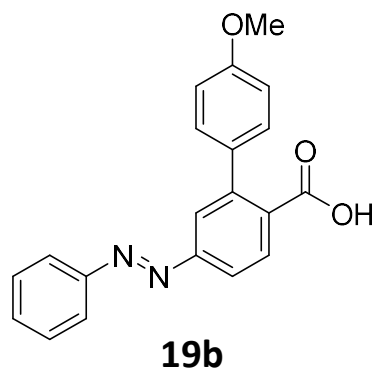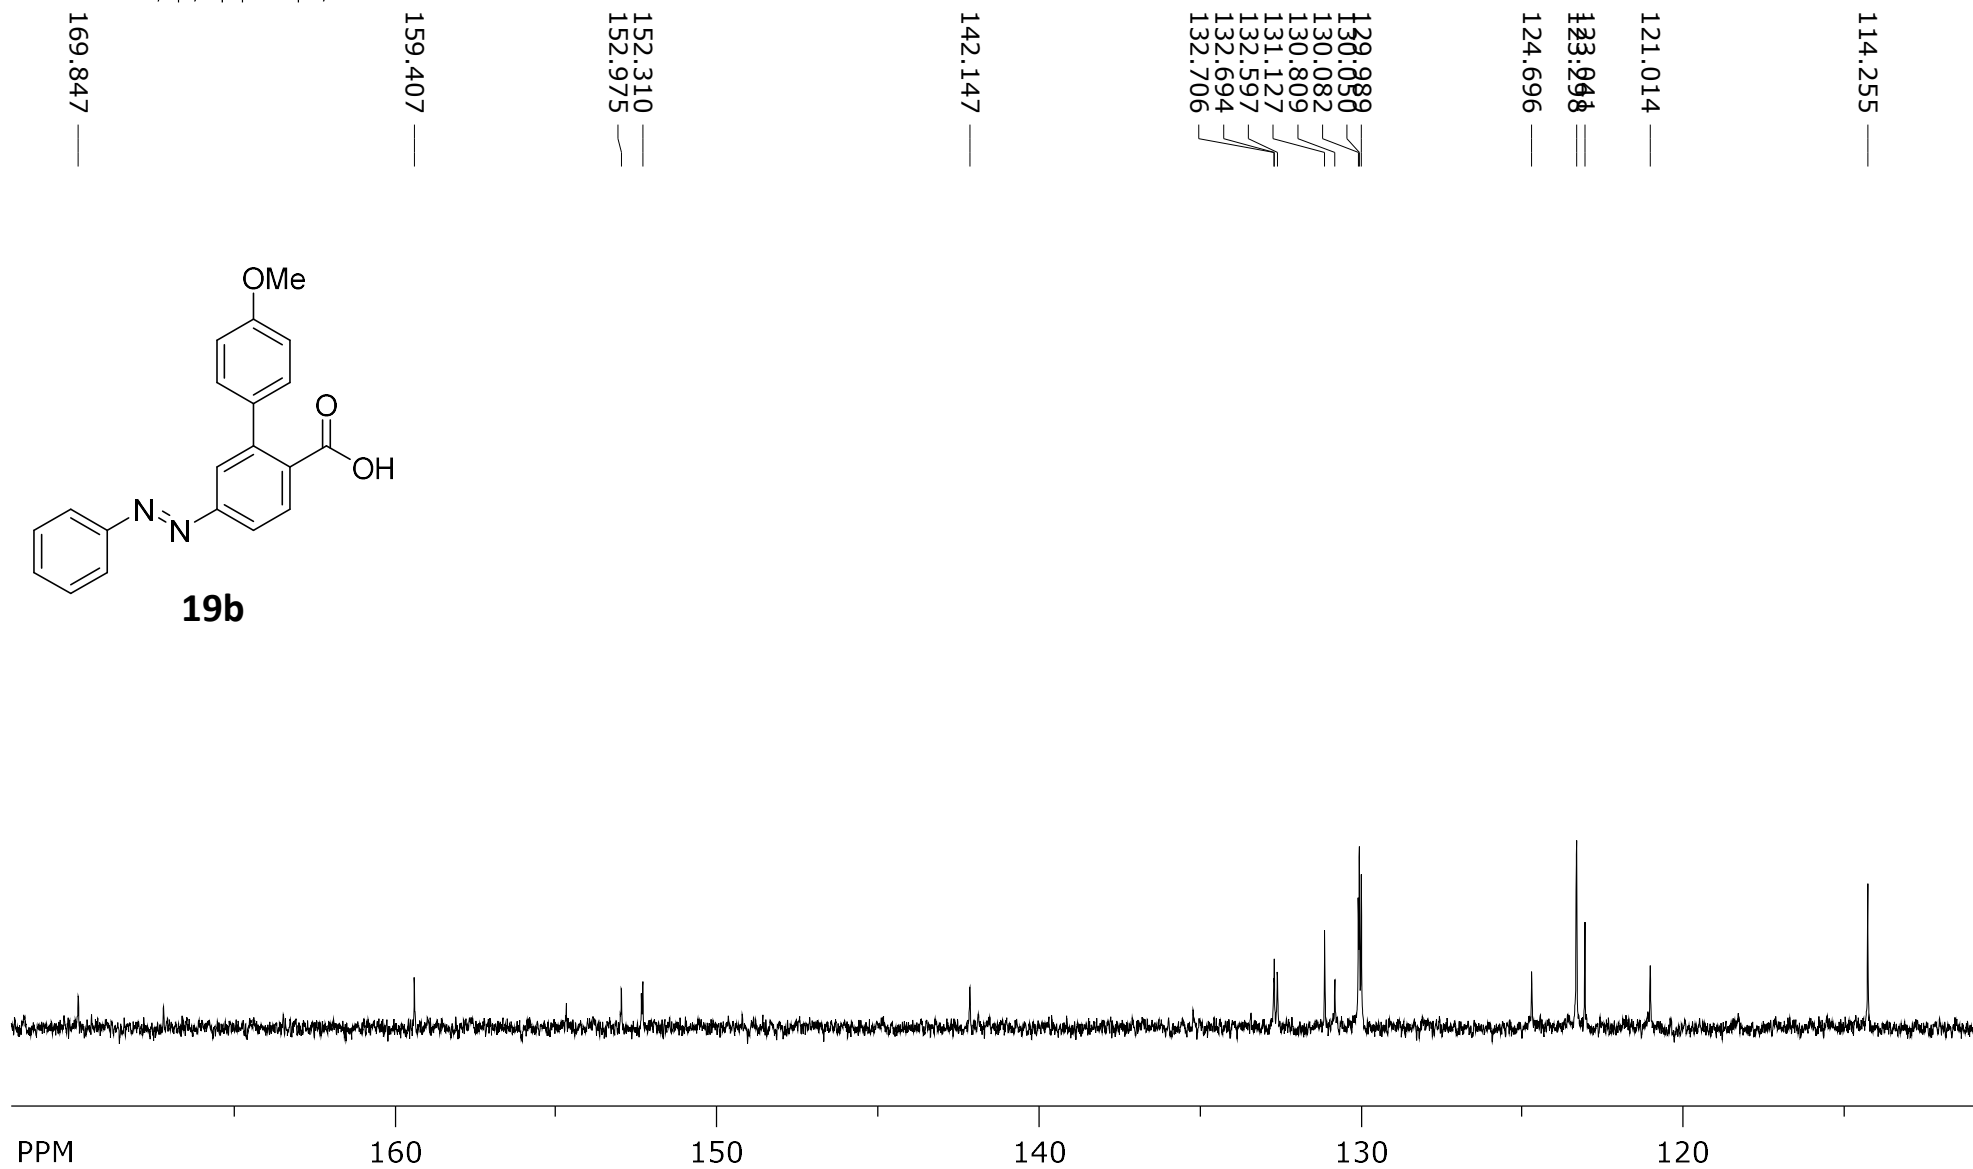

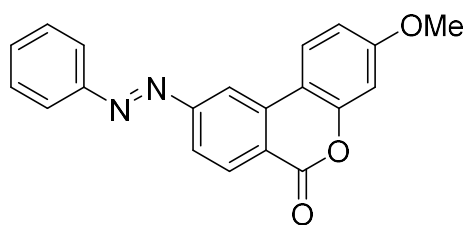

20

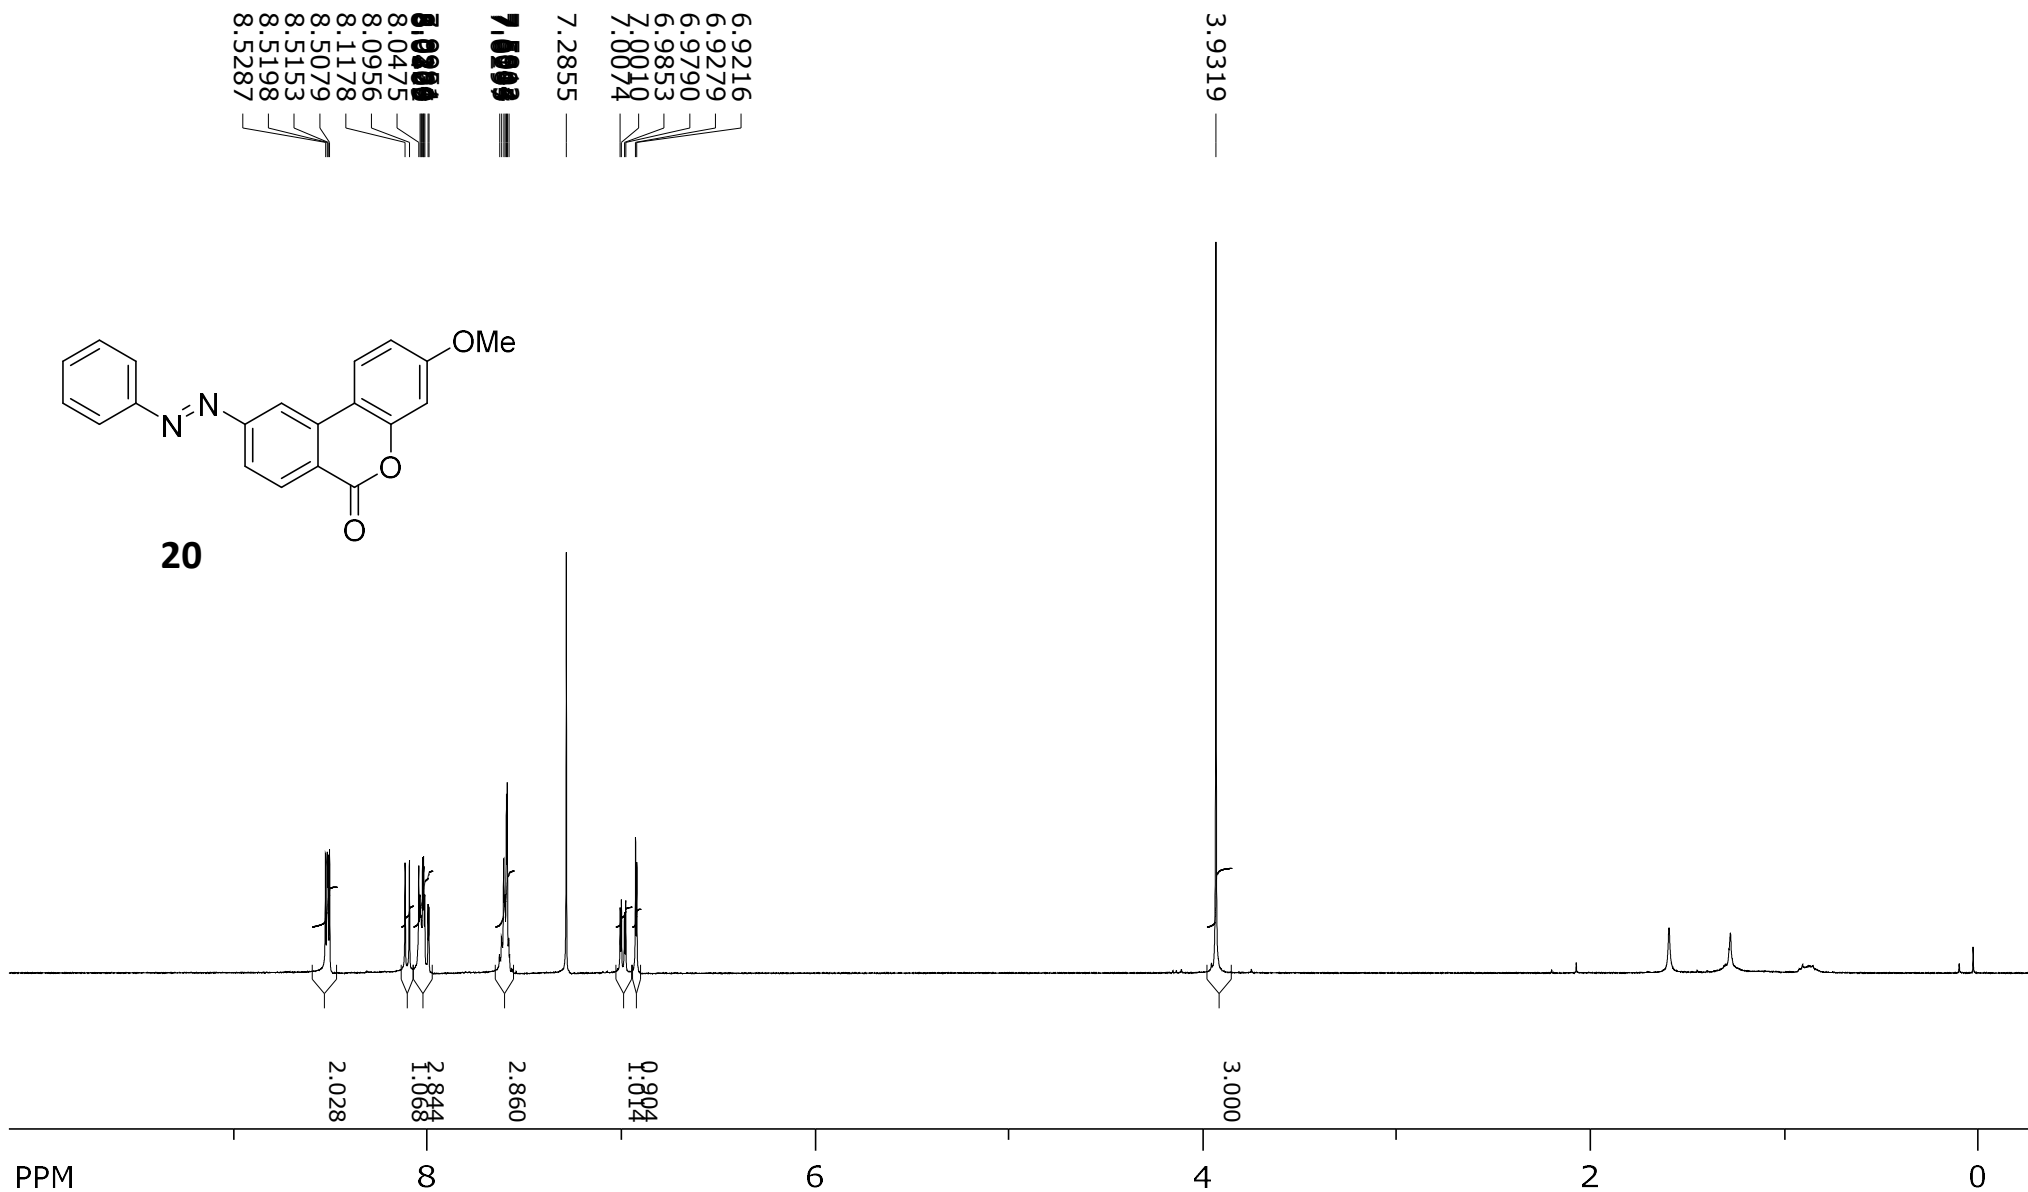

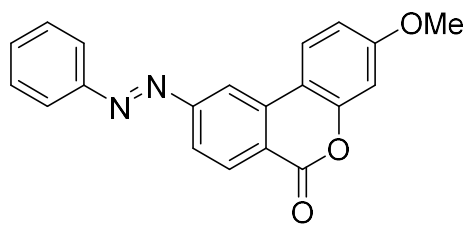

20

8.5079  
8.5153  
8.5198  
8.5287

7.9951  
7.9994  
8.0164  
8.0209  
8.0230  
8.0275  
8.0326  
8.0362  
8.0409  
8.0475  
8.0956  
8.1178

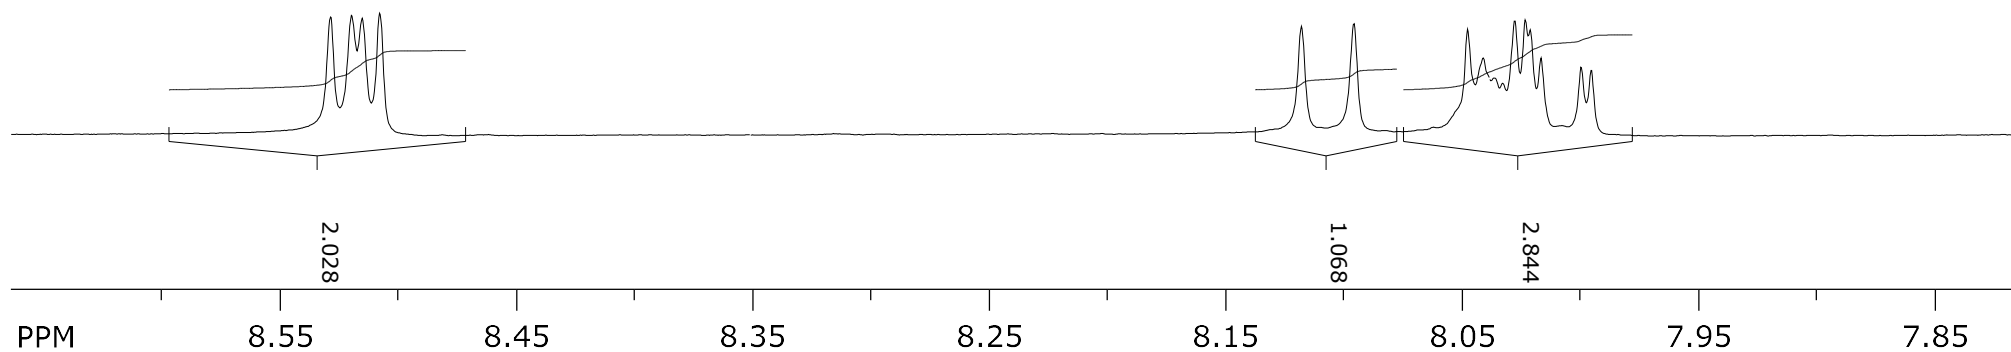

SpinWorks 4: rp-1338r

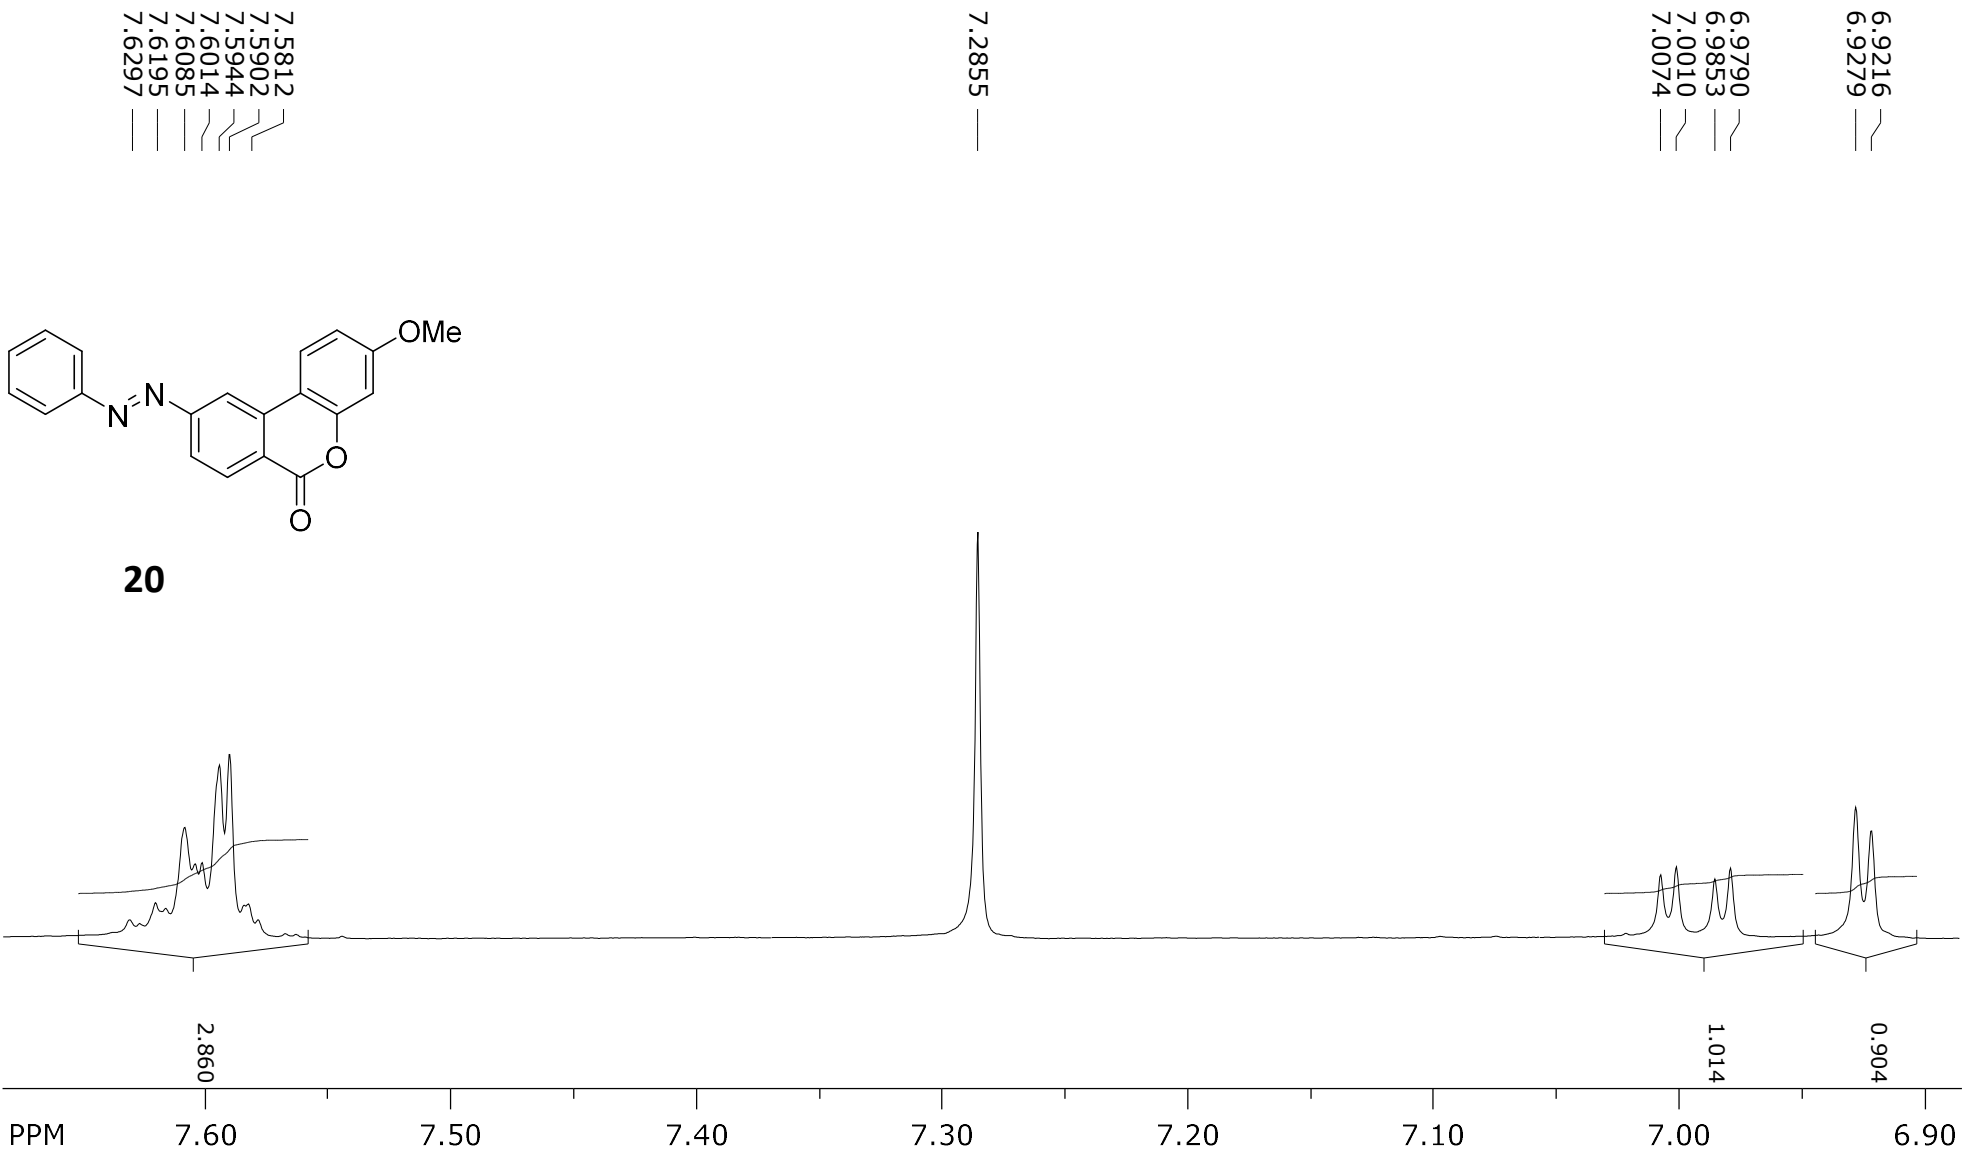



SpinWorks 4: RP 133 8  
C13CPD CDCl3 /opt/topspin3.5pl2/nmrdata nmrsu 30

|         |         |         |        |        |
|---------|---------|---------|--------|--------|
| 152.423 | 111.068 | 101.623 | 76.751 | 55.754 |
| 152.839 | 112.641 |         | 77.069 |        |
| 156.092 |         |         | 77.386 |        |
| 161.059 | 116.548 |         |        |        |
| 161.841 | 120.791 |         |        |        |
|         | 120.963 |         |        |        |
|         | 123.385 |         |        |        |
|         | 124.172 |         |        |        |
|         | 129.318 |         |        |        |
|         | 131.880 |         |        |        |
|         | 132.254 |         |        |        |
|         | 136.404 |         |        |        |



20

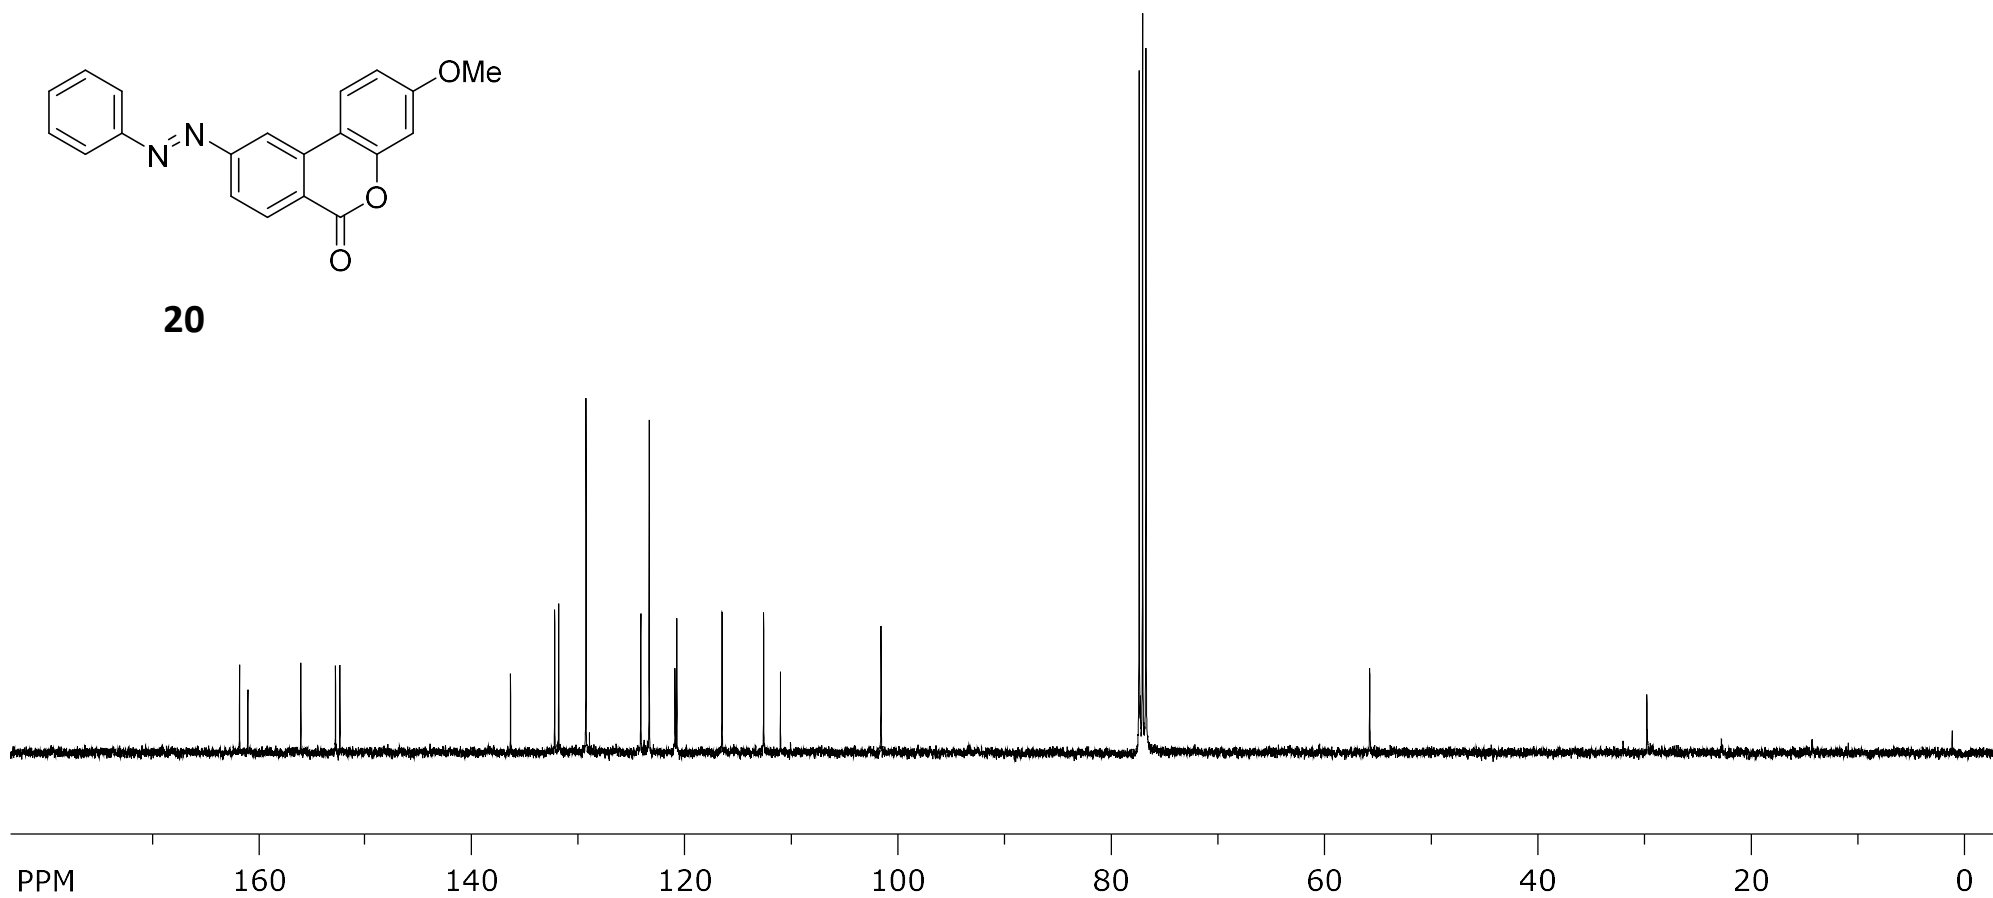

## Experimental Section

General.  $^1\text{H}$  and  $^{13}\text{C}\{\text{H}\}$  NMR spectra of compounds were recorded (using TMS as an internal standard) in 400 and  $\sim 101$  MHz (or 500 and  $\sim 126$  MHz) NMR spectrometers, respectively. The HRMS analysis data of samples reported here were obtained from QTOF mass analyzer using the electrospray ionization (ESI) method. IR spectra of samples reported here were recorded as neat or thin films. Column chromatography purification was carried out on silica gel (100–200 mesh). Reactions were conducted in anhydrous solvents under a nitrogen atm wherever required. Organic layers obtained after the workup were dried using anhydrous  $\text{Na}_2\text{SO}_4$ . Thin layer chromatography (TLC) analyses were performed on silica gel or alumina plates and components were visualized by observation under iodine vapor or using UV lamp. Isolated yields of all the products are reported and yields were not optimized. In all of the cases, after the Pd(II)-catalyzed reactions, the respective crude reaction mixtures were subjected to the column chromatographic purification, and we were focused to isolate the corresponding main products shown in the respective Schemes/Tables and we did not obtain any other by-products in characterizable amounts. While in most of the cases the azobenzenes with *trans* geometry were isolated in pure form, in some cases, the NMR spectra revealed the presence of partial amounts of azobenzenes with *cis* geometry. In some cases, to obtain pure NMR spectra we gently heated the isolated azobenzenes to convert the azobenzenes with *cis* geometry into azobenzenes with *trans* geometry. The corresponding azobenzene carboxylic acids (required to assemble the carboxamides **8** and **10a,b**) were assembled using the standard literature procedures (H. Nishioka, X. Liang, H. Kashidaa, H. Asanuma, *Chem. Commun.* **2007**, 4354–4356) and the carboxamide **5** was assembled from the commercially available azobenzene carboxylic acid. The compound **10g** is a known compound in the literature (E. O. Woolfolk, E. H. Roberts, *J. Org. Chem.* **1956**, *21*, 436–438).

**General procedure for the synthesis of the azobenzene carboxylic acid (8a')**: To a solution of 4-amino-2-methylbenzoic acid (1.2 equiv, 2.4 mmol) suspended in glacial acetic acid (1.5 mL) was added a solution of nitrosobenzene (1 equiv, 2 mmol) in glacial acetic acid (2 mL) and the mixture was stirred at rt for 24 h. After the reaction period, an orange-colored precipitate is observed, which is then filtered using a suction apparatus, washed with ice-cold water and finally dried to obtain the desired azobenzene carboxylic acid as an orange-colored solid.

**General procedure for the synthesis of the carboxamides 5/8/10a/10b-f**: A dry RB flask containing amine (0.9 mmol, 0.9 equiv),  $\text{Et}_3\text{N}$  (1.1 mmol, 1.1 equiv) was stirred for 5–10 min under a nitrogen atm. Then, to the reaction flask was added anhydrous DCM (4 mL) followed

by dropwise addition of the corresponding acid chloride, which was prepared from the corresponding carboxylic acid (1 mmol) and  $\text{SOCl}_2$  (6 equiv) under refluxing condition for 12 h. Then, the reaction mixture was stirred overnight. After this period, the reaction mixture was diluted with dichloromethane (3-5 mL) and washed with water (5-7 mL) and twice with saturated aqueous  $\text{NaHCO}_3$  solution (3-5 mL). The combined organic layers were washed with a minimum dilute  $\text{HBr}$  to remove excess amine and then dried over anhydrous  $\text{Na}_2\text{SO}_4$ , concentrated in a vacuum furnished with the corresponding carboxamides.

**General procedure for the Pd(II)-catalyzed arylation/benylation of the carboxamides 5/8/10a,b and preparation of the compounds 7a-i,k,l/9a-n/11a-d/18a-d:** An appropriate carboxamide (1 equiv), an appropriate aryl/benzyl iodide (3-4 equiv),  $\text{Pd}(\text{OAc})_2$  (10 mol%) and  $\text{AgOAc}$  (2.0-2.2 equiv) in anhydrous toluene (2-3 mL) was heated at 110 °C for 4-48 h under a nitrogen atm in a RB flask. After the reaction period, the reaction mixture was concentrated in a vacuum, and purification of the resulting reaction mixture by column chromatography on neutral alumina or silica gel (eluent =  $\text{EtOAc}$ :hexanes) furnished the corresponding arylated/benzylated carboxamides **7a-i,k,l/9a-n/11a-d/18a-d** (see the corresponding Tables/Schemes for specific examples). The reactions involving ortho-substituted aryl iodides did not afford the compounds **7m,n**.

**General procedure for the Ni(II)-catalyzed mono arylation of the carboxamide 5 and preparation of the compounds 7a', 7b', 7c', 7e', 7j':** An appropriate carboxamide (1 equiv), an appropriate aryl iodide (3 equiv),  $\text{Ni}(\text{OTf})_2$  (10 mol%) and  $\text{Na}_2\text{CO}_3$  (4-6 equiv) was suspended in anhydrous toluene (1 mL) in a 10 mL tube. The tube was flushed with  $\text{N}_2$  for 2 minutes and sealed with a PTFE-lined cap, and then heated at 160 °C for 36-48 h. After the reaction period, the reaction mixture was concentrated in a vacuum and purification of the resulting reaction mixture by column chromatography on neutral alumina or silica gel (eluent =  $\text{EtOAc}$ :hexanes) furnished the corresponding mono arylated carboxamides **7a', 7b', 7c', 7e', 7j'** (see the corresponding Tables/Schemes for specific examples).

**General procedure for the Pd(II)-catalyzed alkylation of the carboxamides 5/8/10a,b and preparation of the compounds 13a-k:** A mixture of an appropriate carboxamide (1 equiv), alkyl iodide (4 equiv), anhydrous  $\text{K}_2\text{CO}_3$  (2 equiv),  $\text{NaOTf}$  (3 equiv),  $\text{Pd}(\text{OAc})_2$  (10 mol%), was suspended in *t*-AmylOH (1 mL) in a 10 mL tube. The tube was flushed with  $\text{N}_2$  for 2 min and sealed with a PTFE-lined cap, and then heated at 125 °C for 22-56 h. After the reaction period, the reaction mixture was concentrated in a vacuum and purification of the resulting reaction mixture by column chromatography on neutral alumina or silica gel (eluent =  $\text{EtOAc}$ :hexanes) furnished the corresponding alkylated carboxamides **13a-k** (see the

corresponding Tables/Schemes for specific examples). The reaction conditions were adapted from; Y. Zhao . G. Chen, *Org. Lett.* **2011**, *13*, 4850-4853.

**General procedure for the Pd(II)-catalyzed alkylation of the carboxamides 5/8/ preparation of the compounds 15a/16a:** A mixture of an appropriate carboxamide (1 equiv), alkyl iodide (4-6 equiv), (BnO)<sub>2</sub>POOH (0.2-2 equiv), Ag<sub>2</sub>CO<sub>3</sub> (2 equiv), Pd(OAc)<sub>2</sub> (5-10 mol%), was suspended in *t*-AmylOH (1.0-2.0 mL) in a 10 mL tube. The tube was flushed with N<sub>2</sub> for 2 minutes and sealed with a PTFE-lined cap and then heated at 105 °C for 12 h. After the reaction period, the reaction mixture was concentrated in a vacuum and purification of the resulting reaction mixture by column chromatography on silica gel (eluent = EtOAc:hexanes) furnished the corresponding alkylated carboxamides **15a** and **16a** (see the corresponding Tables/Schemes for specific examples).

**Procedure for the hydrolysis of the alkylated azobenzene carboxamides 13a.** An appropriate amount of bis alkylated azobenzene carboxamide **13a** (0.075 mmol) was taken in a tube, to which trifluoromethanesulfonic acid (0.15 mL), and toluene:H<sub>2</sub>O (1.5 mL: 0.15 mL) were added under air. The tube was sealed, and the reaction mixture was stirred at 110 °C for 15 h and the reaction mixture was cooled down to room temperature and excess TfOH was quenched by slow addition of a saturated solution of Na<sub>2</sub>CO<sub>3</sub> (5 mL) followed by the extraction using ethyl acetate. The collected organic layers are combined and washed with dilute HBr to remove amine. Purification of the resulting reaction mixture by column chromatography on silica gel eluent=EtOAc:Hexanes) gave the corresponding alkylated azobenzene carboxylic acid **19a** in 95% yield.

**Procedure for the hydrolysis of the arylated azobenzenecarboxamide 7e'.** Arylated azobenzenecarboxamide **7e'** (0.11 mmol) and KOH (6.6 mmol) in methanol (1.5 mL) were heated at 100 °C for 48 h in a sealed tube (flushed with nitrogen atm). After this period, the reaction mixture was diluted with water and extracted with ether (2 × 10 mL), and then acidified with 1 N HCl to get a pH ≈ 2. Extraction with ether (2 × 10 mL) and drying of the combined organic layers over Na<sub>2</sub>SO<sub>4</sub> followed by evaporation of the solvent in a vacuum afforded the corresponding carboxylic acid **19b** in 66% yield.

**Procedure for the lactonization of the arylated azobenzene carboxamides 19b.** To a 10 mL RB flask were added mono-arylated azobenzene carboxamide **19b** (0.12 mmol), K<sub>2</sub>S<sub>2</sub>O<sub>8</sub> (0.36 mmol, 3 equiv) in MeCN:H<sub>2</sub>O (1:1, 2 mL) and heated at 60 °C for 24 h in air. After this period, the reaction mixture was washed with a saturated solution of NaHCO<sub>3</sub> (3 × 5 mL). The combined organic layers were dried over Na<sub>2</sub>SO<sub>4</sub>, followed by evaporation of the solvent in a

vacuum afforded the corresponding cyclized product **20** (procedure adapted from: Wang, Y.; Gulevich, A. V.; Gevorgyan, V. *Chem. Eur. J.* **2013**, *19*, 1583).

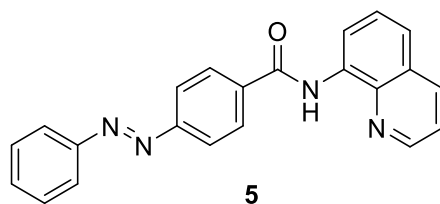

**(E)-4-(Phenyldiazenyl)-N-(quinolin-8-yl)benzamide (5):** The compound **5** was obtained after workup as an orange coloured solid; Yield: 89% (940 mg, 3 mmol scale); mp 150-152 °C; IR (DCM): 3350, 1672, 1530, 1483  $\text{cm}^{-1}$ ;  $^1\text{H}$  NMR (400 MHz,  $\text{CDCl}_3$ ):  $\delta$  10.85 (s, 1H), 8.98 (d, 1H,  $J = 7.4$  Hz), 8.90 (d, 1H,  $J = 7.4$  Hz), 8.27-8.20 (m, 3H), 8.09 (d, 1H,  $J = 8.1$  Hz), 8.00 (d, 1H,  $J = 7.8$  Hz), 7.65-7.50 (m, 6H);  $^{13}\text{C}$  NMR (100 MHz,  $\text{CDCl}_3$ ):  $\delta$  164.7, 154.5, 152.6, 148.4, 138.8, 136.8, 136.5, 134.4, 131.7, 129.2, 128.3, 128.0, 127.5, 123.2, 122.0, 121.8, 116.7; HRMS (ESI):  $m/z$  ( $M + H$ ) $^+$  calcd for  $\text{C}_{22}\text{H}_{17}\text{N}_4\text{O}$ : 353.1402; found 353.1395.

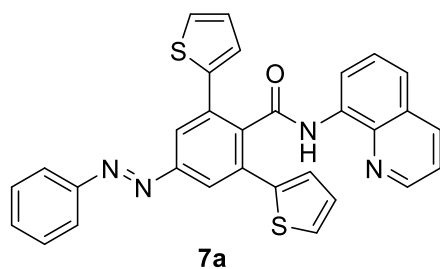

**(E)-4-(Phenyldiazenyl)-N-(quinolin-8-yl)-2,6-di(thiophen-2-yl)benzamide (7a):** The compound **7a** was obtained after purification by column chromatography on silica gel (EtOAc:Hexanes = 15:85) as an orange coloured solid; Yield: 67% (52 mg, 0.15 mmol scale); mp 153-155 °C;  $R_f = 0.40$  (EtOAc:Hexanes = 20:80); IR (DCM): 3334, 1676, 1522, 1483  $\text{cm}^{-1}$ ;  $^1\text{H}$  NMR (400 MHz,  $\text{CDCl}_3$ ):  $\delta$  9.97 (s, 1H), 8.81 (dd, 1H,  $J_1 = 7.3$  Hz,  $J_2 = 1.4$  Hz), 8.67-8.66 (m, 1H), 8.15 (s, 2H), 8.11-8.08 (m, 1H), 8.03-8.01 (m, 2H), 7.61-7.50 (m, 5H), 7.45-7.44 (m, 2H), 7.39-7.36 (m, 1H), 7.27-7.26 (m, 2H), 6.96 (d, 1H,  $J = 5.1$  Hz), 6.95 (d, 1H,  $J = 5.1$  Hz);  $^{13}\text{C}$  NMR (100 MHz,  $\text{CDCl}_3$ ):  $\delta$  166.8, 152.5, 152.3, 148.2, 140.3, 138.4, 137.1, 136.1, 134.3, 134.2, 131.7, 129.2, 127.8, 127.7, 127.5, 127.3, 126.6, 124.0, 123.2, 122.2, 122.1, 121.6, 116.9; HRMS (ESI):  $m/z$  ( $M + H$ ) $^+$  calcd for  $\text{C}_{30}\text{H}_{21}\text{N}_4\text{OS}_2$ : 517.1157; found 517.1133.

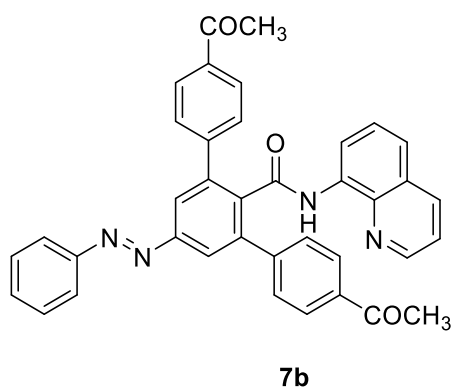

**(E)-4,4''-Diacetyl-5'-(phenyldiazenyl)-N-(quinolin-8-yl)-(1,1':3',1''-terphenyl)-2'-**

**carboxamide (7b):** The compound **7b** was obtained after purification by column chromatography on neutral alumina (EtOAc:Hexanes = 50:50) as an orange coloured solid; Yield: 40% (29 mg, 0.125 mmol scale); mp 200-202 °C;  $R_f$  = 0.37 (EtOAc:Hexanes = 40:60); IR (DCM): 3333, 1681, 1522, 1483  $\text{cm}^{-1}$ ;  $^1\text{H}$  NMR (400 MHz,  $\text{CDCl}_3$ ):  $\delta$  9.75 (s, 1H), 8.59 (dd, 1H,  $J_1$  = 4.2 Hz,  $J_2$  = 1.5 Hz), 8.52 (dd, 1H,  $J_1$  = 6.2 Hz,  $J_2$  = 2.6 Hz), 8.09 (s, 2H), 8.01-8.06 (m, 1H), 8.01-7.99 (m, 2H), 7.91 (d, 4H,  $J$  = 8.3 Hz), 7.75 (d, 4H,  $J$  = 8.3 Hz), 7.59-7.54 (m, 3H), 7.47-7.45 (m, 2H), 7.37 (dd, 1H,  $J_1$  = 8.2 Hz,  $J_2$  = 4.2 Hz), 2.50 (s, 6H);  $^{13}\text{C}$  NMR (100 MHz,  $\text{CDCl}_3$ ):  $\delta$  197.7, 166.3, 152.5, 152.5, 148.1, 144.4, 140.9, 138.2, 137.5, 136.3, 136.2, 133.7, 131.9, 129.3, 129.0, 128.5, 127.7, 127.2, 124.0, 123.2, 122.2, 121.6, 116.7, 26.6; HRMS (ESI):  $m/z$  ( $M + H$ )<sup>+</sup> calcd for  $\text{C}_{38}\text{H}_{29}\text{N}_4\text{O}_3$ : 589.2240; found 589.2219.

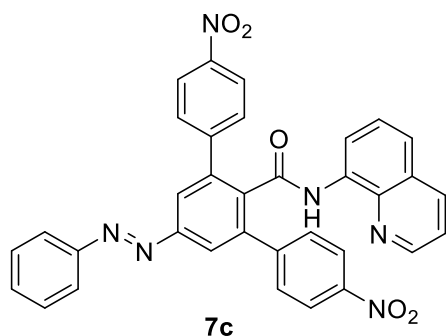

**(E)-4,4''-Dinitro-5'-(phenyldiazenyl)-N-(quinolin-8-yl)-(1,1':3',1''-terphenyl)-2'-**

**carboxamide (7c):** The compound **7c** was obtained after purification by column chromatography on silica gel (EtOAc:Hexanes = 20:80) as an orange coloured solid; Yield: 45% (80 mg, 0.3 mmol scale); mp 249-251 °C;  $R_f$  = 0.30 (EtOAc:Hexanes = 20:80); IR (DCM): 3328, 1674, 1521, 1343  $\text{cm}^{-1}$ ;  $^1\text{H}$  NMR (400 MHz,  $\text{CDCl}_3$ ):  $\delta$  9.75 (s, 1H), 8.59 (d, 1H,  $J$  = 3.1 Hz), 8.48 (d, 1H,  $J$  = 7.2 Hz), 8.20 (d, 4H,  $J$  = 8.6 Hz), 8.12 (s, 2H), 8.13-8.11 (m, 1H), 8.02-8.00 (m, 2H), 7.82 (d, 4H,  $J$  = 8.6 Hz), 7.60-7.46 (m, 5H), 7.41-7.38 (m, 1H);  $^{13}\text{C}$  NMR (100 MHz,  $\text{CDCl}_3$ ):  $\delta$  165.6, 152.6, 152.4, 148.2, 147.5, 146.0, 139.9, 138.1, 137.4, 136.4, 133.3,

132.2, 129.7, 129.4, 128.6, 127.8, 127.2, 127.0, 124.4, 123.4, 123.3, 122.7, 121.8, 116.9; HRMS (ESI):  $m/z$  ( $M + H$ )<sup>+</sup> calcd for C<sub>34</sub>H<sub>23</sub>N<sub>6</sub>O<sub>5</sub>: 595.1730; found 595.1708.

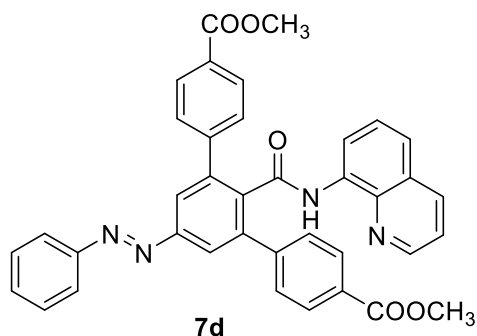

**Dimethyl (E)-5'-(phenyldiazenyl)-2'-(quinolin-8-ylcarbamoyl)-(1,1':3',1''-terphenyl)-4,4''-dicarboxylate (7d):** The compound **7d** was obtained after purification by column chromatography on silica gel (EtOAc:Hexanes = 40:80) as an orange coloured solid; Yield: 27% (34 mg, 0.2 mmol scale); mp 191-193 °C;  $R_f$  = 0.30 (EtOAc:Hexanes = 40:80); IR (DCM): 3333, 1723, 1523, 1483 cm<sup>-1</sup>; <sup>1</sup>H NMR (400 MHz, CDCl<sub>3</sub>):  $\delta$  9.74 (s, 1H), 8.60 (dd, 1H,  $J_1$  = 4.2 Hz,  $J_2$  = 1.6 Hz), 8.51 (dd, 1H,  $J_1$  = 6.5 Hz,  $J_2$  = 2.4 Hz), 8.09-8.07 (m, 1H), 8.08 (s, 2H), 8.01-7.99 (m, 6H), 7.73 (d, 4H,  $J$  = 8.3 Hz), 7.60-7.55 (m, 3H), 7.48-7.43 (m, 3H), 7.37 (dd, 1H,  $J_1$  = 8.3 Hz,  $J_2$  = 4.2 Hz), 3.86 (s, 6H); <sup>13</sup>C NMR (100 MHz, CDCl<sub>3</sub>):  $\delta$  166.8, 166.2, 152.5, 152.4, 148.1, 144.3, 140.9, 138.2, 137.6, 136.2, 133.7, 131.8, 129.7, 129.5, 129.3, 128.8, 127.7, 127.2, 124.0, 123.2, 122.1, 121.6, 116.7, 52.1; HRMS (ESI):  $m/z$  ( $M + H$ )<sup>+</sup> calcd for C<sub>38</sub>H<sub>29</sub>N<sub>4</sub>O<sub>5</sub>: 621.2138; found 621.2126.

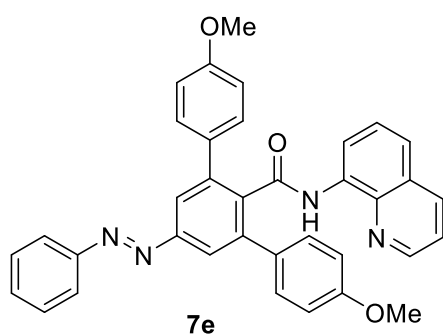

**(E)-4,4''-Dimethoxy-5'-(phenyldiazenyl)-N-(quinolin-8-yl)-(1,1':3',1''-terphenyl)-2'-carboxamide (7e):** The compound **7e** was obtained after purification by column chromatography on silica gel (EtOAc:Hexanes = 20:80) as an orange coloured solid; Yield: 63% (44 mg, 0.125 mmol scale); mp 181-183 °C;  $R_f$  = 0.50 (EtOAc:Hexanes = 20:80); IR (DCM): 3337, 1675, 1524, 1484 cm<sup>-1</sup>; <sup>1</sup>H NMR (400 MHz, CDCl<sub>3</sub>):  $\delta$  9.72 (s, 1H), 8.63-8.59

(m, 2H), 8.09 (dd, 1H,  $J_1 = 8.2$  Hz,  $J_2 = 1.4$  Hz), 8.00-7.99 (m, 3H), 7.96-7.92 (m, 1H), 7.59-7.52 (m, 7H), 7.48-7.46 (m, 2H), 7.38 (dd, 1H,  $J_1 = 8.2$  Hz,  $J_2 = 4.2$  Hz), 6.86-6.82 (m, 4H), 3.71 (s, 6H);  $^{13}\text{C}$  NMR (100 MHz,  $\text{CDCl}_3$ ):  $\delta$  167.4, 159.2, 152.6, 152.4, 148.0, 141.4, 138.3, 138.2, 137.7, 136.1, 134.2, 132.2, 131.5, 129.9, 129.2, 127.7, 127.2, 123.3, 123.1, 121.7, 121.5, 116.5, 113.8, 55.2; HRMS (ESI):  $m/z$  ( $\text{M} + \text{H}$ ) $^+$  calcd for  $\text{C}_{36}\text{H}_{29}\text{N}_4\text{O}_3$ : 565.2240; found 565.2216.

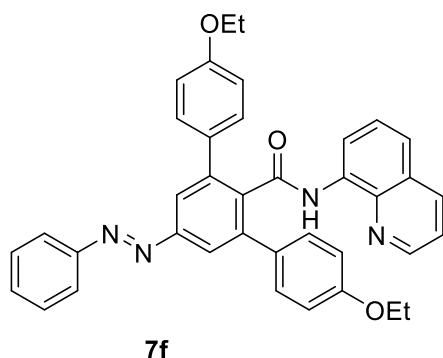

**(E)-4,4''-Diethoxy-5'-(phenyldiazenyl)-N-(quinolin-8-yl)-(1,1':3',1''-terphenyl)-2'-carboxamide (7f):**

The compound **7f** was obtained after purification by column chromatography on silica gel (EtOAc:Hexanes = 20:80) as an orange coloured solid; Yield: 44% (52 mg, 0.2 mmol scale); mp 152-154 °C;  $R_f = 0.50$  (EtOAc:Hexanes = 20:80); IR (DCM): 3341, 1678, 1518, 1482  $\text{cm}^{-1}$ ;  $^1\text{H}$  NMR (400 MHz,  $\text{CDCl}_3$ ):  $\delta$  9.72 (s, 1H), 8.63-8.60 (m, 2H), 8.08 (dd, 1H,  $J_1 = 8.2$  Hz,  $J_2 = 1.6$  Hz), 8.00 (s, 2H), 8.00-7.98 (m, 2H), 7.58-7.53 (m, 7H), 7.49-7.44 (m, 2H), 7.37 (dd, 1H,  $J_1 = 8.3$  Hz,  $J_2 = 4.2$  Hz), 6.85-6.81 (m, 4H), 3.92 (q, 4H,  $J = 7.0$  Hz), 1.33 (t, 6H,  $J = 7.0$  Hz);  $^{13}\text{C}$  NMR (100 MHz,  $\text{CDCl}_3$ ):  $\delta$  167.4, 158.6, 152.6, 152.4, 148.0, 141.4, 138.4, 137.8, 136.0, 134.3, 132.2, 131.5, 129.9, 129.2, 127.7, 127.2, 123.3, 123.1, 121.6, 121.4, 116.5, 114.4, 63.3, 14.8; HRMS (ESI):  $m/z$  ( $\text{M} + \text{H}$ ) $^+$  calcd for  $\text{C}_{38}\text{H}_{33}\text{N}_4\text{O}_3$ : 593.2553; found 593.2529.

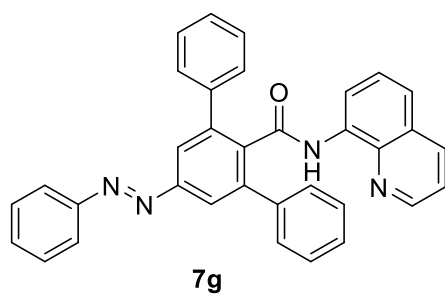

**(E)-5'-(Phenyldiazenyl)-N-(quinolin-8-yl)-(1,1':3',1''-terphenyl)-2'-carboxamide (7g):**

The compound **7g** was obtained after purification by column chromatography on silica gel



(EtOAc:Hexanes = 20:80) as an orange coloured solid; Yield: 42% (42 mg, 0.2 mmol scale); mp 151-153 °C;  $R_f$  = 0.50 (EtOAc:Hexanes = 20:80); IR (DCM): 3337, 1677, 1522, 1483  $\text{cm}^{-1}$ ;  $^1\text{H}$  NMR (400 MHz,  $\text{CDCl}_3$ ):  $\delta$  9.74 (s, 1H), 8.62-8.56 (m, 2H), 8.07 (s, 2H), 8.08-8.06 (m, 1H), 8.01 (d, 2H,  $J_1 = 7.4$  Hz), 7.67 (d, 4H,  $J = 7.5$  Hz), 7.60-7.54 (m, 3H), 7.45-7.44 (m, 2H), 7.38-7.30 (m, 5H), 7.25-7.21 (m, 2H);  $^{13}\text{C}$  NMR (100 MHz,  $\text{CDCl}_3$ ):  $\delta$  166.9, 152.6, 152.4, 147.9, 141.8, 139.9, 138.3, 137.9, 136.0, 134.2, 131.6, 129.2, 128.7, 128.4, 127.7, 127.6, 127.2, 123.7, 123.1, 121.6, 121.4, 116.4; HRMS (ESI):  $m/z$  ( $\text{M} + \text{H}$ ) $^+$  calcd for  $\text{C}_{34}\text{H}_{25}\text{N}_4\text{O}$ : 505.2028; found 505.2042.

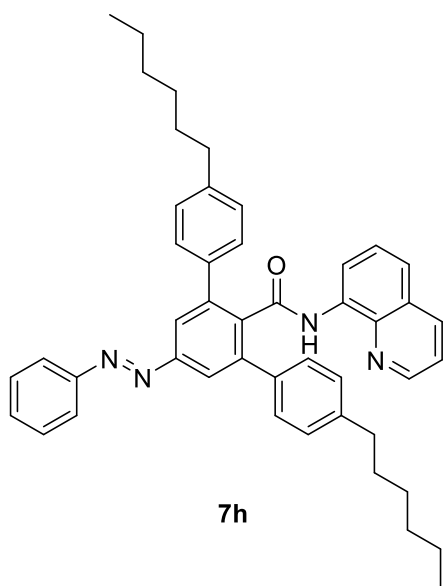

**(E)-4,4''-Dihexyl-5'-(phenyldiazenyl)-N-(quinolin-8-yl)-(1,1':3',1''-terphenyl)-2'-carboxamide (7h):** The compound **7h** was obtained after purification by column chromatography on silica gel (EtOAc:Hexanes = 5:95) as an orange coloured solid; Yield: 57% (120 mg, 0.3 mmol scale); mp 73-75 °C;  $R_f$  = 0.80 (EtOAc:Hexanes = 20:80); IR (DCM): 3339, 2927, 1680 1521  $\text{cm}^{-1}$ ;  $^1\text{H}$  NMR (400 MHz,  $\text{CDCl}_3$ ):  $\delta$  9.69 (s, 1H), 8.61 (dd, 1H,  $J_1 = 4.2$  Hz,  $J_2 = 1.6$  Hz), 8.58 (dd, 2H,  $J_1 = 6.8$  Hz,  $J_2 = 2.2$  Hz), 8.07 (dd, 1H,  $J_1 = 6.8$  Hz,  $J_2 = 2.2$  Hz), 8.04 (s, 2H), 8.00-7.98 (m, 2H), 7.59-7.53 (m, 7H), 7.48-7.43 (m, 2H), 7.34 (dd, 1H,  $J_1 = 8.2$  Hz,  $J_2 = 4.2$  Hz), 7.10 (d, 4H,  $J = 8.1$  Hz), 2.49 (t, 4H,  $J = 7.9$  Hz), 1.44-1.37 (m, 4H), 1.25-1.19 (m, 12H), 0.87 (t, 6H,  $J = 7.0$  Hz);  $^{13}\text{C}$  NMR (100 MHz,  $\text{CDCl}_3$ ):  $\delta$  167.3, 152.7, 152.4, 147.8, 142.4, 141.9, 138.3, 137.9, 137.2, 135.9, 134.4, 131.5, 129.2, 128.6, 128.4, 128.4, 127.6, 127.2, 123.5, 123.1, 121.5, 121.4, 116.4, 35.6, 31.7, 31.2, 28.9, 22.6, 14.2; HRMS (ESI):  $m/z$  ( $\text{M} + \text{H}$ ) $^+$  calcd for  $\text{C}_{46}\text{H}_{49}\text{N}_4\text{O}$ : 673.3906; found 673.3929.

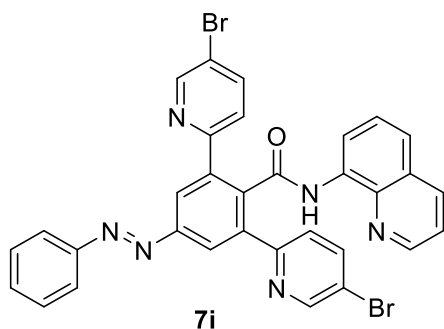

**(E)-2,6-Bis(5-bromopyridin-2-yl)-4-(phenyldiazenyl)-N-(quinolin-8-yl)benzamide (7i):**

The compound **7i** was obtained after purification by column chromatography on silica gel (EtOAc:Hexanes = 20:80) as an orange coloured solid; Yield: 25% (49 mg, 0.3 mmol scale); mp 181-183 °C;  $R_f$  = 0.30 (EtOAc:Hexanes = 20:80); IR (DCM): 3337, 1675, 1524, 1483  $\text{cm}^{-1}$ ;  $^1\text{H}$  NMR (400 MHz,  $\text{CDCl}_3$ ):  $\delta$  9.89 (s, 1H), 8.63-8.58 (m, 4H), 8.33 (s, 2H), 8.11 (dd, 1H,  $J_1 = 8.3$  Hz,  $J_2 = 1.6$  Hz), 8.02-7.99 (m, 2H), 7.76 (dd, 2H,  $J_1 = 8.4$  Hz,  $J_2 = 2.4$  Hz), 7.66 (dd, 2H,  $J_1 = 8.4$  Hz,  $J_2 = 0.6$  Hz), 7.59-7.51 (m, 5H), 7.40 (dd, 1H,  $J_1 = 8.2$  Hz,  $J_2 = 4.2$  Hz);  $^{13}\text{C}$  NMR (100 MHz,  $\text{CDCl}_3$ ):  $\delta$  166.8, 155.6, 152.6, 152.5, 150.5, 148.2, 139.8, 139.0, 138.4, 137.4, 136.0, 134.3, 131.8, 129.2, 127.8, 127.2, 124.6, 123.2, 122.0, 121.6, 120.1, 116.8; HRMS (ESI):  $m/z$  ( $\text{M} + \text{Na}$ ) $^+$  calcd for  $\text{C}_{32}\text{H}_{20}\text{Br}_2\text{N}_6\text{NaO}$ : 684.9963; found 684.9987.

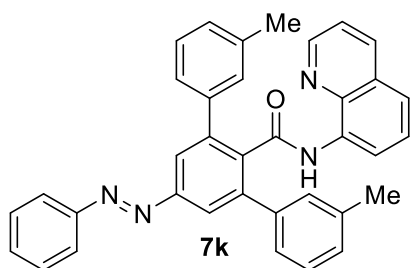

**(E)-3,3'-Dimethyl-5'-(phenyldiazenyl)-N-(quinolin-8-yl)-[1,1':3',1''-terphenyl]-2'-**

**carboxamide (7k):** The compound **7k** was obtained after purification by column chromatography on silica gel (EtOAc:hexane = 10:90) as an orange solid (29 mg, 36%, 0.15 mmol scale);  $R_f$  (10% EtOAc/hexane) 0.5; mp 162-164 °C; IR (DCM): 3339, 1677, 1513, 770  $\text{cm}^{-1}$ ;  $^1\text{H}$  NMR (400 MHz,  $\text{CDCl}_3$ ):  $\delta$  9.71 (1H, s), 8.63 (1H, dd,  $J_1 = 4.2$  Hz,  $J_2 = 1.6$  Hz), 8.57-8.52 (1H, m), 8.09 (1H, dd,  $J_1 = 8.3$ ,  $J_2 = 1.6$  Hz), 8.04 (2H, s), 8.00-7.98 (2H, m), 7.59-7.53 (3H, m), 7.48 (2H, s), 7.45-7.41 (4H, m), 7.39 (1H, dd,  $J_1 = 8.3$  Hz,  $J_2 = 4.3$  Hz), 7.17 (2H, t,  $J = 7.6$  Hz), 7.02 (2H, d,  $J = 7.6$  Hz), 2.25 (6H, s);  $^{13}\text{C}$  NMR (~101 MHz,  $\text{CDCl}_3$ ):  $\delta$  167.1, 152.6, 152.3, 147.8, 141.9, 139.8, 138.3, 137.9, 137.9, 136.0, 134.2, 131.5, 129.5, 129.2,

128.4, 128.2, 127.6, 127.2, 125.7, 123.5, 123.1, 121.5, 121.4, 116.4, 21.3; HRMS (ESI):  $m/z$   $[M+H]^+$  calcd for  $C_{36}H_{29}N_4O$ : 533.2341 found 533.2338.

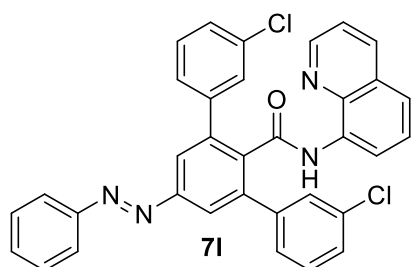

**(E)-3,3''-Dichloro-5'-(phenyldiazenyl)-N-(quinolin-8-yl)-[1,1':3',1''-terphenyl]-2'-**

**carboxamide (71):** The compound **71** was obtained after purification by column chromatography on silica gel (EtOAc:hexane = 10:90) as an orange solid (29 mg, 34%, 0.15 mmol scale);  $R_f$  (10% EtOAc/hexane) 0.4; mp 197-198 °C; IR (DCM): 3331, 1677, 1580, 770  $cm^{-1}$ ;  $^1H$  NMR (400 MHz,  $CDCl_3$ ):  $\delta$  9.71 (1H, s), 8.68 (1H, dd,  $J_1 = 4.2$ ,  $J_2 = 1.6$  Hz), 8.51 (1H, dd,  $J_1 = 5.9$ ,  $J_2 = 3.0$  Hz), 8.11 (1H, dd,  $J_1 = 8.3$ ,  $J_2 = 1.6$  Hz), 8.05 (2H, s), 8.02-7.99 (2H, m), 7.69-7.68 (2H, m), 7.61-7.55 (3H, m), 7.50-7.45 (4H, m), 7.41 (1H, dd,  $J_1 = 8.3$ ,  $J_2 = 4.2$  Hz), 7.21-7.19 (4H, m);  $^{13}C\{^1H\}$  NMR (~101 MHz,  $CDCl_3$ ):  $\delta$  166.2, 152.5, 152.4, 148.2, 141.4, 140.5, 138.3, 137.6, 136.1, 134.3, 133.8, 131.8, 129.6, 129.3, 129.0, 127.9, 127.7, 127.2, 126.8, 123.9, 123.2, 122.0, 121.5, 116.7; HRMS (ESI):  $m/z$   $[M+H]^+$  calcd for  $C_{34}H_{23}Cl_2N_4O$ : 573.1249 found 573.1243.

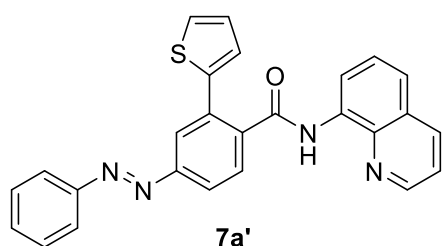

**(E)-4-(Phenyldiazenyl)-N-(quinolin-8-yl)-2-(thiophen-2-yl)benzamide (7a')**: The compound **7a'** was obtained after purification by column chromatography on silica gel (EtOAc:Hexanes = 20:80) as an orange colored solid; Yield: 47% (41 mg, 0.2 mmol scale); mp 191-193 °C;  $R_f = 0.40$  (EtOAc:Hexanes = 20:80); IR (DCM): 1673, 1523, 1482, 1326  $cm^{-1}$ ;  $^1H$  NMR (500 MHz,  $CDCl_3$ ):  $\delta$  9.96 (s, 1H), 8.79 (dd, 1H,  $J_1 = 7.5$  Hz,  $J_2 = 1.2$  Hz), 8.53 (dd, 1H,  $J_1 = 4.2$  Hz,  $J_2 = 1.6$  Hz), 8.04-8.00 (m, 2H), 7.91-7.86 (m, 4H), 7.49-7.40 (m, 5H), 7.29

(dd, 1H,  $J_1 = 8.2$  Hz,  $J_2 = 4.2$  Hz), 7.23 (dd, 1H,  $J_1 = 3.6$  Hz,  $J_2 = 1.1$  Hz), 7.17 (dd, 1H,  $J_1 = 5.1$  Hz,  $J_2 = 1.1$  Hz), 6.85-6.83 (m, 1H);  $^{13}\text{C}$  NMR ( $\sim 126$  MHz,  $\text{CDCl}_3$ ):  $\delta$  167.1, 153.2, 152.6, 148.0, 140.4, 138.5, 138.0, 136.1, 134.5, 133.6, 131.6, 130.0, 129.2, 127.9, 127.7, 127.6, 127.3, 126.8, 125.5, 123.2, 121.9, 121.9, 121.6, 116.5; HRMS (ESI):  $m/z$  ( $\text{M} + \text{H}$ ) $^+$  calcd for  $\text{C}_{26}\text{H}_{19}\text{N}_4\text{OS}$ : 435.1280; found 435.1266.

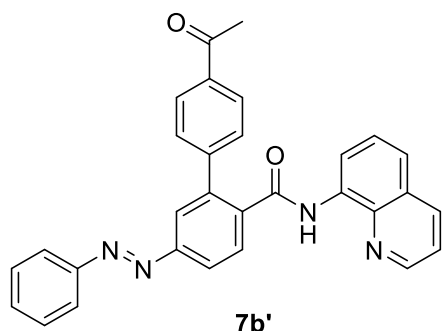

**(E)-4'-Acetyl-5-(phenyldiazenyl)-N-(quinolin-8-yl)-(1,1'-biphenyl)-2-carboxamide (7b')**:

The compound **7b'** was obtained after purification by column chromatography on silica gel (EtOAc:Hexanes = 40:60) as an orange coloured solid; Yield: 50% (35 mg, 0.15 mmol scale); mp 189-191 °C;  $R_f = 0.30$  (EtOAc:Hexanes = 40:60); IR (DCM): 3332, 1679, 1524, 1484  $\text{cm}^{-1}$ ;  $^1\text{H}$  NMR (400 MHz,  $\text{CDCl}_3$ ):  $\delta$  9.93 (s, 1H), 8.82 (d, 1H,  $J = 7.2$  Hz), 8.56 (br s, 1H), 8.13-8.07 (m, 4H), 8.01 (s, 1H), 8.00 (s, 1H), 7.94 (d, 2H,  $J = 7.7$  Hz), 7.72 (d, 2H,  $J = 7.6$  Hz), 7.58-7.51 (m, 5H), 7.40-7.38 (m, 1H), 2.50 (s, 3H);  $^{13}\text{C}$  NMR (100 MHz,  $\text{CDCl}_3$ ):  $\delta$  197.6, 166.7, 153.5, 152.5, 147.9, 144.4, 140.4, 138.4, 137.8, 136.4, 136.2, 134.2, 131.8, 130.3, 129.3, 129.2, 128.6, 127.8, 127.3, 124.8, 123.2, 122.5, 122.0, 121.6, 116.5; HRMS (ESI):  $m/z$  ( $\text{M} + \text{H}$ ) $^+$  calcd for  $\text{C}_{30}\text{H}_{23}\text{N}_4\text{O}_2$ : 471.1821; found 471.1841.

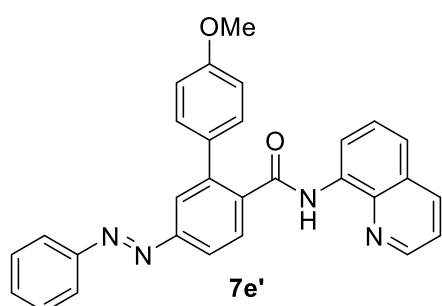

**(E)-4'-Methoxy-5-(phenyldiazenyl)-N-(quinolin-8-yl)-(1,1'-biphenyl)-2-carboxamide**

**(7e')**: The compound **7e'** was obtained after purification by column chromatography on silica gel (EtOAc:Hexanes = 15:85) as an orange coloured solid; Yield: 44% (40 mg, 0.2 mmol scale); mp 181-183 °C;  $R_f = 0.40$  (EtOAc:Hexanes = 20:80); IR (DCM): 3328, 1670, 1523,

1483  $\text{cm}^{-1}$ ;  $^1\text{H}$  NMR (400 MHz,  $\text{CDCl}_3$ ):  $\delta$  9.93 (s, 1H), 8.88 (d, 1H,  $J = 7.5$  Hz), 8.57 (d, 1H,  $J = 4.0$  Hz), 8.12-7.99 (m, 6H), 7.57-7.750 (m, 7H), 7.38 (dd, 1H,  $J_1 = 8.2$  Hz,  $J_2 = 4.2$  Hz), 6.89 (d, 2H,  $J = 8.2$  Hz), 3.69 (s, 3H);  $^{13}\text{C}$  NMR (100 MHz,  $\text{CDCl}_3$ ):  $\delta$  167.3, 159.6, 153.4, 152.6, 147.8, 141.1, 138.5, 137.6, 136.1, 134.5, 131.8, 131.6, 130.5, 130.3, 129.2, 127.8, 127.3, 125.2, 123.1, 121.7, 121.5, 121.3, 116.4, 114.1, 55.2; HRMS (ESI):  $m/z$  ( $\text{M} + \text{H}$ ) $^+$  calcd for  $\text{C}_{29}\text{H}_{23}\text{N}_4\text{O}_2$ : 459.1821; found 459.1833.

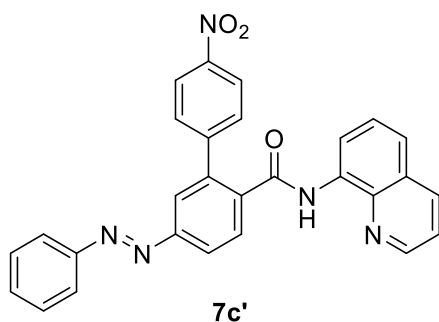

**(E)-4'-Nitro-5-(phenyldiazenyl)-N-(quinolin-8-yl)-(1,1'-biphenyl)-2-carboxamide (7c')**

The compound **7c'** was obtained after purification by column chromatography on silica gel (EtOAc:Hexanes = 15:95) as an orange coloured solid; Yield: 20% (18 mg, 0.2 mmol scale); mp 142-144  $^{\circ}\text{C}$ ;  $R_f = 0.40$  (EtOAc:Hexanes = 20:80); IR (DCM): 3332, 1673, 1522, 1483  $\text{cm}^{-1}$ ;  $^1\text{H}$  NMR (400 MHz,  $\text{CDCl}_3$ ):  $\delta$  9.97 (s, 1H), 8.81 (d, 1H,  $J = 6.5$  Hz), 8.60 (d, 1H,  $J = 3.8$  Hz), 8.22 (d, 2H,  $J = 7.8$  Hz), 8.16-8.09 (m, 1H), 8.14 (s, 2H), 8.05-8.00 (m, 3H), 7.78 (d, 2H,  $J = 7.8$  Hz), 7.59-7.54 (m, 6H), 7.44-7.41 (m, 1H);  $^{13}\text{C}$  NMR (100 MHz,  $\text{CDCl}_3$ ):  $\delta$  166.2, 153.5, 152.5, 148.0, 147.5, 146.4, 137.7, 136.4, 134.0, 132.0, 130.4, 129.9, 129.3, 127.9, 127.3, 124.6, 123.8, 123.3, 123.2, 122.3, 121.8, 116.6, 26.6; HRMS (ESI):  $m/z$  ( $\text{M} + \text{H}$ ) $^+$  calcd for  $\text{C}_{28}\text{H}_{20}\text{N}_5\text{O}_3$ : 474.1566; found 474.1553.

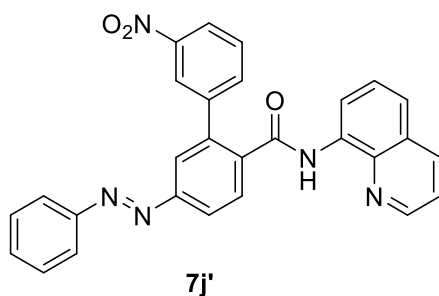

**(E)-3'-Nitro-5-(phenyldiazenyl)-N-(quinolin-8-yl)-(1,1'-biphenyl)-2-carboxamide (7j')**

The compound **7j'** was obtained after purification by column chromatography on silica gel (EtOAc:Hexanes = 15:85) as an orange coloured solid; Yield: 28% (20 mg, 0.15 mmol scale); mp 169-171  $^{\circ}\text{C}$ ;  $R_f = 0.40$  (EtOAc:Hexanes = 20:80); IR (DCM): 3333, 1673, 1527, 1484  $\text{cm}^{-1}$

<sup>1</sup>H NMR (400 MHz, CDCl<sub>3</sub>): δ 9.94 (s, 1H), 8.78 (d, 1H, *J* = 6.6 Hz), 8.58-8.55 (m, 2H), 8.14-8.01 (m, 7H), 7.87 (d, 1H, *J* = 7.6 Hz), 7.59-7.52 (m, 5H), 7.47-7.41 (m, 2H); <sup>13</sup>C NMR (100 MHz, CDCl<sub>3</sub>): δ 166.2, 153.5, 152.5, 148.4, 148.1, 141.4, 139.1, 138.3, 137.8, 136.3, 135.2, 134.0, 131.9, 130.4, 129.4, 129.3, 127.8, 127.3, 124.6, 123.9, 123.2, 122.8, 122.2, 121.8, 116.5; HRMS (ESI): *m/z* (M + H)<sup>+</sup> calcd for C<sub>28</sub>H<sub>20</sub>N<sub>5</sub>O<sub>3</sub>: 474.1566; found 474.1551.

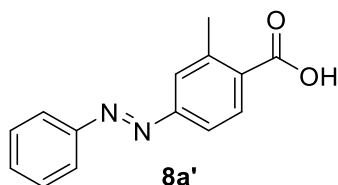

**(E)-2-Methyl-4-(phenyldiazenyl)benzoic acid (8a')**: The compound **8a'** was obtained after workup as an orange coloured solid; Yield: 83% (400 mg, 2 mmol scale); mp 198-200 °C; IR (DCM): 1691, 1571, 1413, 1269 cm<sup>-1</sup>; <sup>1</sup>H NMR (400 MHz, DMSO-*d*<sub>6</sub>): δ 8.00 (d, 1H, *J* = 8.2 Hz), 7.91-7.89 (m, 2H), 7.77 (s, 1H), 7.73 (d, 1H, *J* = 8.4 Hz), 7.62-7.59 (m, 3H), 2.62 (s, 3H); <sup>13</sup>C NMR (100 MHz, DMSO-*d*<sub>6</sub>): δ 168.6, 153.6, 152.3, 141.1, 133.2, 132.5, 130.0, 126.1, 123.2, 119.8, 21.8; HRMS (ESI): *m/z* (M + H)<sup>+</sup> calcd for C<sub>14</sub>H<sub>13</sub>N<sub>2</sub>O<sub>2</sub>: 241.0977; found 241.0965 (in the proton NMR the OH peak could not be identified).

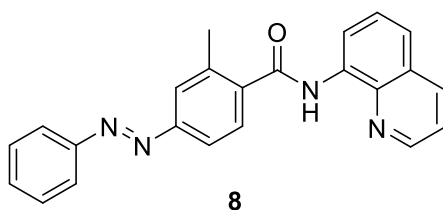

**(E)-2-Methyl-4-(phenyldiazenyl)-N-(quinolin-8-yl)benzamide (8)**: The compound **8** was obtained (from **8a'**) as an orange coloured solid; Yield: 87% (320 mg, 1 mmol scale); mp 163-165 °C; IR (DCM): 3357, 1678, 1524, 1482 cm<sup>-1</sup>; <sup>1</sup>H NMR (400 MHz, CDCl<sub>3</sub>): δ 10.31 (s, 1H), 8.99 (d, 1H, *J* = 7.1 Hz), 8.82 (dd, 1H, *J*<sub>1</sub> = 4.2 Hz, *J*<sub>2</sub> = 1.5 Hz), 8.23 (dd, 1H, *J*<sub>1</sub> = 8.2 Hz, *J*<sub>2</sub> = 1.0 Hz), 8.00-7.98 (m, 2H), 7.90-7.85 (m, 3H), 7.66-7.53 (m, 5H), 7.48 (dd, 1H, *J*<sub>1</sub> = 8.3 Hz, *J*<sub>2</sub> = 4.2 Hz), 2.74 (s, 3H); <sup>13</sup>C NMR (100 MHz, CDCl<sub>3</sub>): δ 167.5, 153.4, 152.6, 148.4, 138.6, 138.5, 138.1, 136.4, 134.6, 131.4, 129.2, 128.3, 128.0, 127.4, 125.6, 123.1, 122.0, 121.8, 120.5, 116.7, 20.4; HRMS (ESI): *m/z* (M + H)<sup>+</sup> calcd for C<sub>23</sub>H<sub>19</sub>N<sub>4</sub>O: 367.1559; found 367.1547.

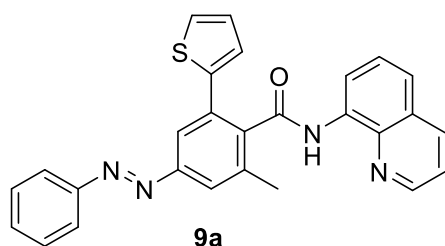

**(E)-2-Methyl-4-(phenyldiazenyl)-N-(quinolin-8-yl)-6-(thiophen-2-yl)benzamide (9a):** The compound **9a** was obtained after purification by column chromatography on silica (EtOAc:Hexanes = 10:90) as an orange coloured solid; Yield: 66% (59 mg, 0.2 mmol scale); mp 125-127 °C;  $R_f$  = 0.50 (EtOAc:Hexanes = 20:80); IR (DCM): 3337, 1674, 1521, 1483  $\text{cm}^{-1}$ ;  $^1\text{H}$  NMR (400 MHz,  $\text{CDCl}_3$ ):  $\delta$  9.95 (s, 1H), 8.94 (dd, 1H,  $J_1 = 7.5$  Hz,  $J_2 = 1.0$  Hz), 8.70 (dd, 1H,  $J_1 = 4.2$  Hz,  $J_2 = 1.4$  Hz), 8.13 (dd, 1H,  $J_1 = 8.3$  Hz,  $J_2 = 1.4$  Hz), 8.03-8.00 (m, 3H), 7.84 (s, 1H), 7.63-7.54 (m, 5H), 7.42-7.39 (m, 2H), 7.22 (dd, 1H,  $J_1 = 5.1$  Hz,  $J_2 = 0.4$  Hz), 6.94-6.91 (m, 1H), 2.64 (s, 3H);  $^{13}\text{C}$  NMR (100 MHz,  $\text{CDCl}_3$ ):  $\delta$  167.7, 152.6, 152.5, 148.3, 140.8, 138.4, 138.3, 137.3, 136.2, 134.3, 133.2, 131.5, 129.2, 127.9, 127.7, 127.3, 127.0, 126.3, 123.4, 123.1, 122.6, 122.1, 121.7, 116.8, 19.9; HRMS (ESI):  $m/z$  ( $M + H$ ) $^+$  calcd for  $\text{C}_{27}\text{H}_{21}\text{N}_4\text{OS}$ : 449.1436; found 449.1451.

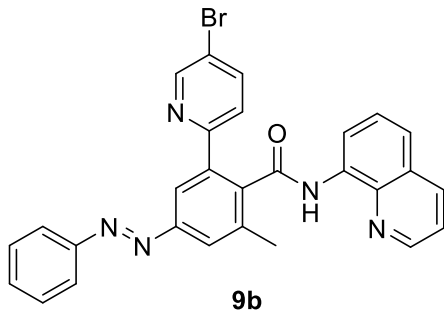

**(E)-2-(5-Bromopyridin-2-yl)-6-methyl-4-(phenyldiazenyl)-N-(quinolin-8-yl)benzamide (9b):** The compound **9b** was obtained after purification by column chromatography on silica (EtOAc:Hexanes = 10:90) as an orange coloured solid; Yield: 78% (81 mg, 0.2 mmol scale); mp 121-123 °C;  $R_f$  = 0.50 (EtOAc:Hexanes = 20:80); IR (DCM): 3341, 1675, 1521, 1483  $\text{cm}^{-1}$ ;  $^1\text{H}$  NMR (400 MHz,  $\text{CDCl}_3$ ):  $\delta$  9.87 (s, 1H), 8.85 (dd, 1H,  $J_1 = 7.2$  Hz,  $J_2 = 1.5$  Hz), 8.67 (dd, 1H,  $J_1 = 4.2$  Hz,  $J_2 = 1.5$  Hz), 8.58 (d, 1H,  $J = 1.9$  Hz), 8.17-8.15 (m, 2H), 8.00-7.95 (m, 3H), 7.74 (dd, 1H,  $J_1 = 8.4$  Hz,  $J_2 = 2.3$  Hz), 7.67 (d, 1H,  $J = 8.4$  Hz), 7.60-7.53 (m, 5H), 7.43 (dd, 1H,  $J_1 = 8.2$  Hz,  $J_2 = 4.2$  Hz), 2.68 (s, 3H);  $^{13}\text{C}$  NMR (100 MHz,  $\text{CDCl}_3$ ):  $\delta$  167.7, 155.6, 152.6, 150.4, 148.3, 139.0, 138.5, 138.4, 138.3, 137.8, 136.2, 134.4, 131.5, 129.2, 127.9, 127.3, 125.2,

124.3, 123.1, 122.0, 121.7, 121.6, 119.9, 116.8, 19.9; HRMS (ESI):  $m/z$  ( $M + H$ )<sup>+</sup> calcd for C<sub>28</sub>H<sub>21</sub>BrN<sub>5</sub>O: 522.0929; found 522.0945.

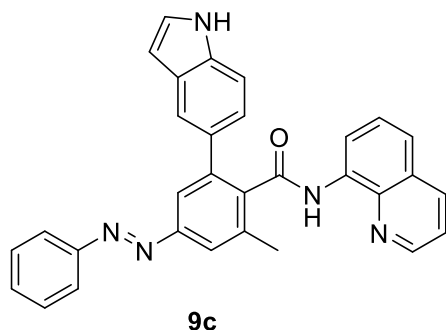

**(E)-2-(1H-Indol-5-yl)-6-methyl-4-(phenyldiazenyl)-N-(quinolin-8-yl)benzamide (9c):** The compound **9c** was obtained after purification by column chromatography on silica (EtOAc:Hexanes = 50:60) as an orange coloured solid; Yield: 50% (48 mg, 0.2 mmol scale); mp 176-178 °C;  $R_f$  = 0.20 (EtOAc:Hexanes = 50:60); IR (DCM): 3320, 1650, 1520, 1484, cm<sup>-1</sup>; <sup>1</sup>H NMR (400 MHz, CDCl<sub>3</sub>):  $\delta$  9.75 (s, 1H), 8.79 (dd, 1H,  $J_1$  = 7.5 Hz,  $J_2$  = 1.3 Hz), 8.54 (dd, 1H,  $J_1$  = 4.2 Hz,  $J_2$  = 1.6 Hz), 8.13 (br s, 1H), 8.01-7.97 (m, 4H), 7.93 (d, 1H,  $J$  = 0.8 Hz), 7.85 (d, 1H,  $J$  = 1.1 Hz), 7.59-7.52 (m, 3H), 7.50-7.46 (m, 1H), 7.44-7.40 (m, 2H), 7.30-7.27 (m, 1H), 7.16 (d, 1H,  $J$  = 8.4 Hz), 7.06 (t, 1H,  $J$  = 2.8 Hz), 6.48 (t, 1H,  $J$  = 2.2 Hz), 2.67 (s, 3H); <sup>13</sup>C NMR (100 MHz, CDCl<sub>3</sub>):  $\delta$  168.3, 152.7, 152.5, 148.0, 142.1, 138.9, 138.4, 137.1, 136.0, 135.3, 134.3, 131.6, 131.3, 129.2, 128.0, 127.7, 127.2, 124.6, 123.0, 123.0, 122.7, 121.7, 121.4, 121.1, 116.6, 110.9, 102.9, 20.0; HRMS (ESI):  $m/z$  ( $M + H$ )<sup>+</sup> calcd for C<sub>31</sub>H<sub>24</sub>N<sub>5</sub>O: 482.1981; found 482.1964.

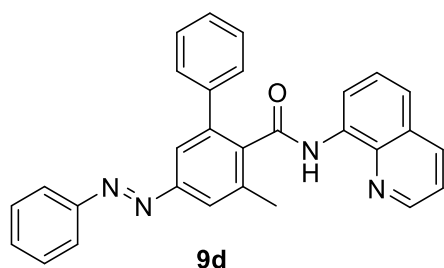

**(E)-3-Methyl-5-(phenyldiazenyl)-N-(quinolin-8-yl)-(1,1'-biphenyl)-2-carboxamide (9d):** The compound **9d** was obtained after purification by column chromatography on silica (EtOAc:Hexanes = 10:90) as an orange coloured solid; Yield: 70% (62 mg, 0.2 mmol scale); mp 120-122 °C;  $R_f$  = 0.50 (EtOAc:Hexanes = 20:80); IR (DCM): 3342, 1673, 1522, 1483 cm<sup>-1</sup>



<sup>1</sup>H NMR (400 MHz, CDCl<sub>3</sub>): δ 9.74 (s, 1H), 8.82 (dd, 1H, *J*<sub>1</sub> = 7.4 Hz, *J*<sub>2</sub> = 1.3 Hz), 8.65 (dd, 1H, *J*<sub>1</sub> = 4.2 Hz, *J*<sub>2</sub> = 1.6 Hz), 8.10 (dd, 1H, *J*<sub>1</sub> = 8.3 Hz, *J*<sub>2</sub> = 1.5 Hz), 8.01-7.99 (m, 2H), 7.92-7.89 (m, 2H), 7.66-7.64 (m, 2H), 7.60-7.53 (m, 4H), 7.50 (dd, 1H, *J*<sub>1</sub> = 8.4 Hz, *J*<sub>2</sub> = 1.5 Hz), 7.38 (dd, 1H, *J*<sub>1</sub> = 8.2 Hz, *J*<sub>2</sub> = 4.2 Hz), 7.28 (t, 2H, *J* = 7.5 Hz), 7.16 (t, 1H, *J* = 7.4 Hz), 2.74 (s, 3H); <sup>13</sup>C NMR (100 MHz, CDCl<sub>3</sub>): δ 167.7, 152.6, 152.5, 148.1, 140.8, 139.8, 138.7, 138.4, 137.3, 136.1, 134.3, 131.4, 129.2, 128.7, 128.3, 127.8, 127.6, 127.3, 123.5, 123.0, 122.2, 121.9, 121.5, 116.5, 20.0; HRMS (ESI): *m/z* (M + H)<sup>+</sup> calcd for C<sub>29</sub>H<sub>23</sub>N<sub>4</sub>O: 443.1872; found 443.1859.

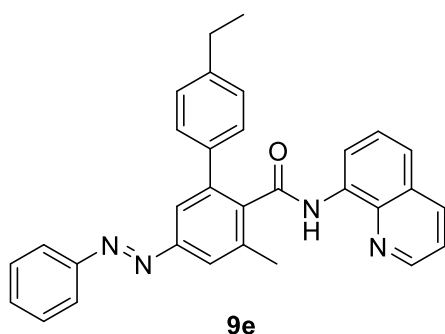

**(*E*)-4'-Ethyl-3-methyl-5-(phenyldiazenyl)-*N*-(quinolin-8-yl)-(1,1'-biphenyl)-2-**

**carboxamide (9e):** The compound **9e** was obtained after purification by column chromatography on silica (EtOAc:Hexanes = 10:90) as an orange coloured solid; Yield: 70% (66 mg, 0.2 mmol scale); mp 73-75 °C; *R*<sub>f</sub> = 0.60 (EtOAc:Hexanes = 20:80); IR (DCM): 3339, 1674, 1522, 1483 cm<sup>-1</sup>; <sup>1</sup>H NMR (400 MHz, CDCl<sub>3</sub>): δ 9.72 (s, 1H), 8.82 (dd, 1H, *J*<sub>1</sub> = 7.4 Hz, *J*<sub>2</sub> = 1.3 Hz), 8.65 (dd, 1H, *J*<sub>1</sub> = 4.2 Hz, *J*<sub>2</sub> = 1.6 Hz), 8.11 (dd, 1H, *J*<sub>1</sub> = 8.3 Hz, *J*<sub>2</sub> = 1.6 Hz), 8.00-7.97 (m, 2H), 7.91-7.86 (m, 2H), 7.59-7.49 (m, 7H), 7.39 (dd, 1H, *J*<sub>1</sub> = 8.2, *J*<sub>2</sub> = 4.2 Hz), 7.09 (d, 2H, *J* = 8.1 Hz), 2.67 (s, 3H), 2.48 (q, 2H, *J* = 7.6 Hz), 1.01 (t, 3H, *J* = 7.6 Hz); <sup>13</sup>C NMR (100 MHz, CDCl<sub>3</sub>): δ 167.9, 152.6, 152.5, 148.0, 143.0, 140.9, 138.7, 138.4, 137.3, 137.1, 136.1, 134.3, 131.4, 129.2, 128.6, 127.8, 127.8, 127.3, 123.3, 123.0, 122.3, 121.8, 121.5, 116.6, 28.4, 20.0, 15.3; HRMS (ESI): *m/z* (M + H)<sup>+</sup> calcd for C<sub>31</sub>H<sub>27</sub>N<sub>4</sub>O: 471.2185; found 471.2198.

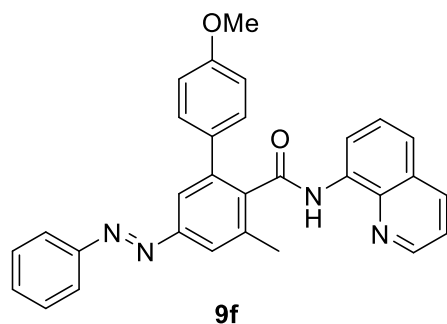

**(E)-4'-Methoxy-3-methyl-5-(phenyldiazenyl)-N-(quinolin-8-yl)-(1,1'-biphenyl)-2-**

**carboxamide (9f):** The compound **9f** was obtained after purification by column chromatography on silica gel (EtOAc:Hexanes = 20:80) as an orange coloured solid; Yield: 78% (73 mg, 0.2 mmol scale); mp 87-89 °C;  $R_f$  = 0.30 (EtOAc:Hexanes = 20:80); IR (DCM): 3342, 1674, 1521, 1249  $\text{cm}^{-1}$ ;  $^1\text{H}$  NMR (400 MHz,  $\text{CDCl}_3$ ):  $\delta$  9.73 (s, 1H), 8.83 (dd, 1H,  $J_1$  = 7.3 Hz,  $J_2$  = 1.5 Hz), 8.66 (dd, 1H,  $J_1$  = 4.2 Hz,  $J_2$  = 1.6 Hz), 8.13 (dd, 1H,  $J_1$  = 8.3 Hz,  $J_2$  = 1.6 Hz), 7.90-7.97 (m, 2H), 7.88-7.84 (m, 2H), 7.59-7.51 (m, 7H), 7.41 (dd, 1H,  $J_1$  = 8.3 Hz,  $J_2$  = 4.2 Hz), 6.83-6.80 (m, 2H), 3.68 (s, 3H), 2.65 (s, 3H);  $^{13}\text{C}$  NMR (100 MHz,  $\text{CDCl}_3$ ):  $\delta$  168.0, 159.2, 152.6, 152.5, 148.1, 140.1, 138.7, 138.4, 137.2, 136.2, 134.3, 132.2, 131.4, 129.9, 129.2, 127.8, 127.3, 123.0, 122.3, 121.9, 121.6, 116.6, 113.8, 55.1, 20.0; HRMS (ESI):  $m/z$  ( $M + H$ )<sup>+</sup> calcd for  $\text{C}_{30}\text{H}_{25}\text{N}_4\text{O}_2$ : 473.1978; found 473.1997.

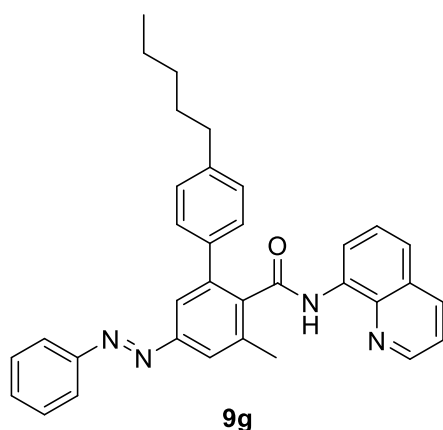

**(E)-3-Methyl-4'-pentyl-5-(phenyldiazenyl)-N-(quinolin-8-yl)-(1,1'-biphenyl)-2-**

**carboxamide (9g):** The compound **9g** was obtained after purification by column chromatography on neutral alumina (EtOAc:Hexanes = 5:95) as an orange coloured solid; Yield: 77% (79 mg, 0.2 mmol scale); mp 61-63 °C;  $R_f$  = 0.80 (EtOAc:Hexanes = 20:80); IR (DCM): 3340, 2930, 1676, 1522  $\text{cm}^{-1}$ ;  $^1\text{H}$  NMR (400 MHz,  $\text{CDCl}_3$ ):  $\delta$  9.71 (s, 1H), 8.83 (d, 1H,  $J$  = 7.5 Hz), 8.64 (dd, 1H,  $J_1$  = 4.2 Hz,  $J_2$  = 1.5 Hz), 8.09 (d, 1H,  $J$  = 8.2 Hz), 7.99 (d, 1H,  $J$  = 7.1 Hz), 7.92 (s, 1H), 7.87 (s, 1H), 7.59-7.48 (m, 7H), 7.37 (dd, 1H,  $J_1$  = 8.2 Hz,  $J_2$  = 4.1

Hz), 7.08 (d, 2H,  $J = 7.9$  Hz), 2.68 (s, 3H), 2.43 (t, 2H,  $J = 7.7$  Hz), 1.36-1.30 (m, 2H), 1.24-1.18 (m, 2H), 1.12-1.06 (m, 2H), 0.80 (t, 3H,  $J = 7.3$  Hz);  $^{13}\text{C}$  NMR (100 MHz,  $\text{CDCl}_3$ ):  $\delta$  167.9, 152.7, 152.5, 148.0, 142.4, 141.0, 138.7, 138.4, 137.3, 137.1, 136.1, 134.4, 131.3, 129.2, 128.5, 128.4, 127.8, 127.2, 123.3, 123.0, 122.2, 121.8, 121.5, 116.5, 35.4, 31.2, 30.8, 22.4, 20.0, 14.0; HRMS (ESI):  $m/z$  ( $\text{M} + \text{H}$ ) $^+$  calcd for  $\text{C}_{34}\text{H}_{33}\text{N}_4\text{O}$ : 513.2654; found 513.2672.

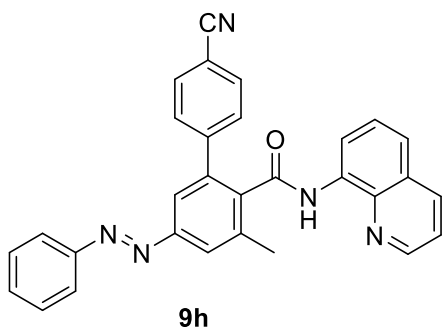

**(E)-4'-Cyano-3-methyl-5-(phenyldiazenyl)-N-(quinolin-8-yl)-(1,1'-biphenyl)-2-**

**carboxamide (9h):** The compound **9h** was obtained after purification by column chromatography on silica (EtOAc:Hexanes = 20:80) as an orange coloured solid; Yield: 59% (55 mg, 0.2 mmol scale); mp 91-93 °C;  $R_f = 0.30$  (EtOAc:Hexanes = 20:80); IR (DCM): 3337, 1674, 1522, 1483  $\text{cm}^{-1}$ ;  $^1\text{H}$  NMR (400 MHz,  $\text{CDCl}_3$ ):  $\delta$  9.73 (s, 1H), 8.77 (dd, 1H,  $J_1 = 5.8$  Hz,  $J_2 = 3.2$  Hz), 8.65 (dd, 1H,  $J_1 = 4.2$  Hz,  $J_2 = 1.6$  Hz), 8.16 (dd, 1H,  $J_1 = 8.3$  Hz,  $J_2 = 1.6$  Hz), 8.00-7.98 (m, 2H), 7.94 (d, 1H,  $J = 1.0$  Hz), 7.86 (d, 1H,  $J = 1.0$  Hz), 7.76-7.73 (m, 2H), 7.61-7.55 (m, 7H), 7.44 (dd, 1H,  $J_1 = 8.3$  Hz,  $J_2 = 4.2$  Hz), 2.68 (s, 3H);  $^{13}\text{C}$  NMR (100 MHz,  $\text{CDCl}_3$ ):  $\delta$  170.0, 152.6, 152.5, 148.2, 144.6, 138.8, 138.4, 138.3, 137.8, 136.4, 133.8, 132.1, 131.7, 129.4, 129.2, 127.9, 127.3, 124.9, 123.1, 122.4, 121.8, 121.6, 118.6, 116.7, 111.5, 20.0; HRMS (ESI):  $m/z$  ( $\text{M} + \text{H}$ ) $^+$  calcd for  $\text{C}_{30}\text{H}_{22}\text{N}_5\text{O}$ : 468.1824; found 468.1808.

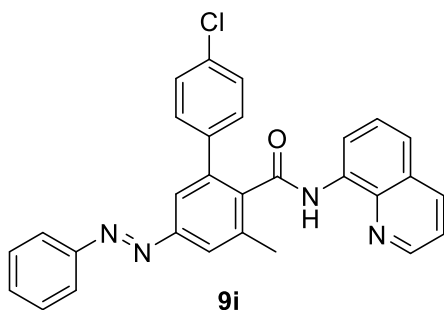

**(E)-4'-Chloro-3-methyl-5-(phenyldiazenyl)-N-(quinolin-8-yl)-(1,1'-biphenyl)-2-**

**carboxamide (9i):** The compound **9i** was obtained after purification by column chromatography on silica (EtOAc:Hexanes = 10:90) as an orange coloured solid; Yield: 65%

(62 mg, 0.2 mmol scale); mp 82-84 °C;  $R_f$  = 0.50 (EtOAc:Hexanes = 20:80); IR (DCM): 3338, 1674, 1522, 1484  $\text{cm}^{-1}$ ;  $^1\text{H}$  NMR (400 MHz,  $\text{CDCl}_3$ ):  $\delta$  9.75 (s, 1H), 8.81 (dd, 1H,  $J_1$  = 7.0 Hz,  $J_2$  = 1.8 Hz), 8.66 (dd, 1H,  $J_1$  = 4.2 Hz,  $J_2$  = 1.5 Hz), 8.14 (dd, 1H,  $J_1$  = 8.3 Hz,  $J_2$  = 1.5 Hz), 8.00-7.98 (m, 2H), 7.89 (s, 1H), 7.86 (s, 1H), 7.60-7.53 (m, 7H), 7.42 (dd, 1H,  $J_1$  = 8.2 Hz,  $J_2$  = 4.2 Hz), 7.26 (d, 2H,  $J$  = 8.5 Hz), 2.66 (s, 3H);  $^{13}\text{C}$  NMR (100 MHz,  $\text{CDCl}_3$ ):  $\delta$  167.5, 152.6, 152.5, 148.2, 139.5, 138.6, 138.4, 138.3, 137.4, 136.2, 134.1, 133.9, 131.5, 130.0, 129.2, 128.6, 127.9, 127.3, 123.9, 123.1, 122.2, 122.0, 121.7, 116.7, 20.0; HRMS (ESI):  $m/z$  ( $\text{M} + \text{H}$ ) $^+$  calcd for  $\text{C}_{29}\text{H}_{22}\text{ClN}_4\text{O}$ : 477.1482; found 477.1469.

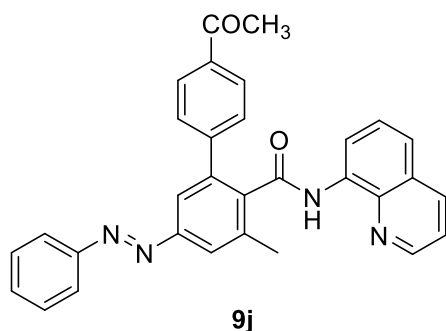

**(E)-4'-Acetyl-3-methyl-5-(phenyldiazenyl)-N-(quinolin-8-yl)-(1,1'-biphenyl)-2-**

**carboxamide (9j):** The compound **9j** was obtained after purification by column chromatography on silica (EtOAc:Hexanes = 30:70) as an orange coloured solid; Yield: 56% (54 mg, 0.2 mmol scale); mp 92-94 °C;  $R_f$  = 0.20 (EtOAc:Hexanes = 30:70); IR (DCM): 3342, 1676, 1521, 1483  $\text{cm}^{-1}$ ;  $^1\text{H}$  NMR (400 MHz,  $\text{CDCl}_3$ ):  $\delta$  9.76 (s, 1H), 8.79 (dd, 1H,  $J_1$  = 7.0 Hz,  $J_2$  = 2.0 Hz), 8.65 (dd, 1H,  $J_1$  = 4.2 Hz,  $J_2$  = 1.6 Hz), 8.13 (dd, 1H,  $J_1$  = 8.3 Hz,  $J_2$  = 1.6 Hz), 8.00-7.98 (m, 2H), 7.92-7.89 (m, 4H), 7.74-7.72 (m, 2H), 7.60-7.51 (m, 5H), 7.41 (dd, 1H,  $J_1$  = 8.2 Hz,  $J_2$  = 4.2 Hz), 2.68 (s, 3H), 2.48 (s, 3H);  $^{13}\text{C}$  NMR (100 MHz,  $\text{CDCl}_3$ ):  $\delta$  197.7, 167.3, 152.6, 152.5, 148.2, 144.6, 139.6, 138.5, 138.3, 137.6, 136.2, 136.1, 134.0, 131.6, 129.2, 129.0, 128.4, 127.9, 127.3, 124.3, 123.1, 122.1, 121.9, 121.6, 116.7, 26.6, 20.0; HRMS (ESI):  $m/z$  ( $\text{M} + \text{H}$ ) $^+$  calcd for  $\text{C}_{31}\text{H}_{25}\text{N}_4\text{O}_2$ : 485.1978; found 485.1958.

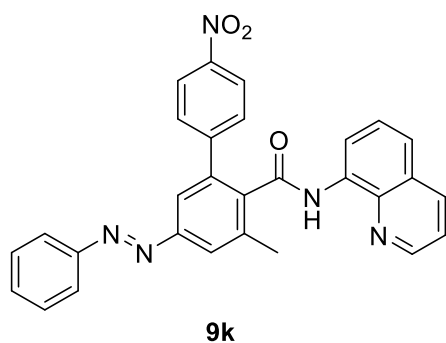

**(E)-3-Methyl-4'-nitro-5-(phenyldiazenyl)-N-(quinolin-8-yl)-(1,1'-biphenyl)-2-**

**carboxamide (9k):** The compound **9k** was obtained after purification by column chromatography on silica (EtOAc:Hexanes = 15:95) as an orange coloured solid; Yield: 69% (67 mg, 0.2 mmol scale); mp 93-95 °C;  $R_f$  = 0.50 (EtOAc:Hexanes = 30:70); IR (DCM): 3335, 1674, 1519, 1484  $\text{cm}^{-1}$ ;  $^1\text{H}$  NMR (400 MHz,  $\text{CDCl}_3$ ):  $\delta$  9.78 (s, 1H), 8.78 (dd, 1H,  $J_1$  = 6.2 Hz,  $J_2$  = 1.8 Hz), 8.65 (d, 1H,  $J$  = 2.6 Hz), 8.15-8.13 (m, 3H), 7.99 (d, 2H,  $J$  = 6.7 Hz), 7.96 (s, 1H), 7.88 (s, 1H), 7.80 (d, 2H,  $J$  = 8.6 Hz), 7.60-7.53 (m, 5H), 7.42 (dd, 1H,  $J_1$  = 8.2 Hz,  $J_2$  = 4.2 Hz), 2.69 (s, 3H);  $^{13}\text{C}$  NMR (100 MHz,  $\text{CDCl}_3$ ):  $\delta$  166.9, 152.6, 152.5, 148.3, 147.3, 146.5, 138.5, 138.4, 138.3, 137.8, 136.4, 133.8, 131.7, 129.7, 129.3, 127.9, 127.3, 125.1, 123.6, 123.1, 122.4, 121.8, 121.6, 116.8, 20.0; HRMS (ESI):  $m/z$  ( $\text{M} + \text{H}$ ) $^+$  calcd for  $\text{C}_{29}\text{H}_{22}\text{N}_5\text{O}_3$ : 488.1723; found 488.1711.

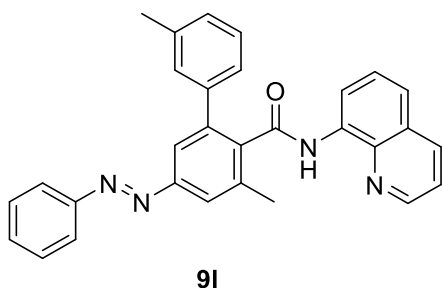

**(E)-3,3'-Dimethyl-5-(phenyldiazenyl)-N-(quinolin-8-yl)-(1,1'-biphenyl)-2-carboxamide**

**(9l):** The compound **9l** was obtained after purification by column chromatography on silica (EtOAc:Hexanes = 10:90) as an orange coloured solid; Yield: 77% (70 mg, 0.2 mmol scale); mp 98-100 °C;  $R_f$  = 0.50 (EtOAc:Hexanes = 20:80); IR (DCM): 3053, 1674, 1522, 1263  $\text{cm}^{-1}$ ;  $^1\text{H}$  NMR (400 MHz,  $\text{CDCl}_3$ ):  $\delta$  9.72 (s, 1H), 8.80 (dd, 1H,  $J_1$  = 7.3 Hz,  $J_2$  = 1.4 Hz), 8.66 (dd, 1H,  $J_1$  = 4.2 Hz,  $J_2$  = 1.6 Hz), 8.12 (dd, 1H,  $J_1$  = 8.2 Hz,  $J_2$  = 1.5 Hz), 8.00-7.98 (m, 2H), 7.90 (s, 1H), 7.87 (s, 1H), 7.60-7.49 (m, 5H), 7.45 (s, 1H), 7.42-7.39 (m, 2H), 7.14 (t, 1H,  $J$  = 7.6 Hz), 6.95 (d, 1H,  $J$  = 7.6 Hz), 2.67 (s, 3H), 2.23 (s, 3H);  $^{13}\text{C}$  NMR (100 MHz,  $\text{CDCl}_3$ ):  $\delta$  167.8, 152.7, 152.5, 148.0, 141.0, 139.7, 138.7, 138.4, 137.9, 137.3, 136.1, 134.3, 131.4, 129.5, 129.2, 128.4, 128.2, 127.8, 127.3, 125.7, 123.4, 123.0, 122.2, 121.8, 121.5, 116.5, 21.3, 20.0; HRMS (ESI):  $m/z$  ( $\text{M} + \text{H}$ ) $^+$  calcd for  $\text{C}_{30}\text{H}_{25}\text{N}_4\text{O}$ : 457.2028; found 457.2043.

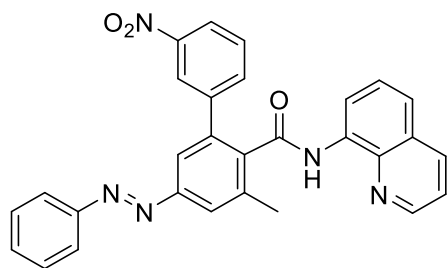

**9m**

**(E)-3-Methyl-3'-nitro-5-(phenyldiazenyl)-N-(quinolin-8-yl)-(1,1'-biphenyl)-2-**

**carboxamide (9m):** The compound **9m** was obtained after purification by column chromatography on silica (EtOAc:Hexanes = 20:80) as an orange coloured solid; Yield: 51% (50 mg, 0.2 mmol scale); mp 196-198 °C;  $R_f$  = 0.40 (EtOAc:Hexanes = 30:70); IR (DCM): 3335, 1674, 1526, 1483  $\text{cm}^{-1}$ ;  $^1\text{H}$  NMR (400 MHz,  $\text{CDCl}_3$ ):  $\delta$  9.77 (s, 1H), 8.76 (d, 1H,  $J$  = 6.6 Hz), 8.63 (d, 1H,  $J$  = 3.8 Hz), 8.55 (s, 1H), 8.12 (d, 1H,  $J$  = 8.2 Hz), 8.01-7.90 (m, 6H), 7.59-7.52 (m, 5H), 7.41-7.37 (m, 2H), 2.69 (s, 3H);  $^{13}\text{C}$  NMR (100 MHz,  $\text{CDCl}_3$ ):  $\delta$  166.9, 152.6, 152.5, 148.3, 148.2, 141.5, 138.6, 138.3, 138.3, 137.8, 136.3, 134.7, 133.8, 131.7, 129.2, 127.8, 127.2, 125.0, 123.8, 123.1, 122.5, 122.3, 121.8, 121.6, 116.7, 20.0; HRMS (ESI):  $m/z$  ( $\text{M} + \text{H}$ )<sup>+</sup> calcd for  $\text{C}_{29}\text{H}_{22}\text{N}_5\text{O}_3$ : 488.1723; found 488.1703.

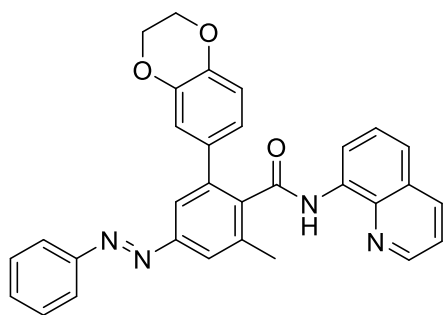

**9n**

**(E)-2-(2,3-Dihydrobenzo(b)(1,4)dioxin-6-yl)-6-methyl-4-(phenyldiazenyl)-N-(quinolin-8-**

**yl)benzamide (9n):** The compound **9n** was obtained after purification by column chromatography on silica (EtOAc:Hexanes = 20:80) as an orange coloured solid; Yield: 69% (69 mg, 0.2 mmol scale); mp 91-93 °C;  $R_f$  = 0.30 (EtOAc:Hexanes = 20:80); IR (DCM): 3338, 1674, 1522, 1483  $\text{cm}^{-1}$ ;  $^1\text{H}$  NMR (400 MHz,  $\text{CDCl}_3$ ):  $\delta$  9.74 (s, 1H), 8.83 (dd, 1H,  $J_1$  = 7.4 Hz,  $J_2$  = 1.4 Hz), 8.69 (dd, 1H,  $J_1$  = 4.2 Hz,  $J_2$  = 1.6 Hz), 8.14 (dd, 1H,  $J_1$  = 4.2 Hz,  $J_2$  = 1.6 Hz), 7.99-7.97 (m, 2H), 7.87-7.84 (m, 2H), 7.59-7.51 (m, 5H), 7.42 (dd, 1H,  $J_1$  = 8.3 Hz,  $J_2$  = 2.3 Hz), 7.17 (d, 1H,  $J$  = 2.1 Hz), 7.10 (dd, 1H,  $J_1$  = 8.2 Hz,  $J_2$  = 2.2 Hz), 6.73 (d, 1H,  $J$  = 8.4 Hz), 4.14-4.09 (m, 4H), 2.65 (s, 3H);  $^{13}\text{C}$  NMR (100 MHz,  $\text{CDCl}_3$ ):  $\delta$  167.8, 152.6, 152.5, 148.1,

143.4, 143.3, 140.3, 138.6, 138.4, 137.3, 136.1, 134.4, 133.2, 131.4, 129.2, 127.8, 127.3, 123.3, 123.0, 122.1, 121.9, 121.8, 121.5, 117.8, 117.1, 116.6, 64.2, 64.2, 20.0; HRMS (ESI):  $m/z$  ( $M + H$ )<sup>+</sup> calcd for C<sub>31</sub>H<sub>25</sub>N<sub>4</sub>O<sub>3</sub>: 501.1927; found 501.1903.

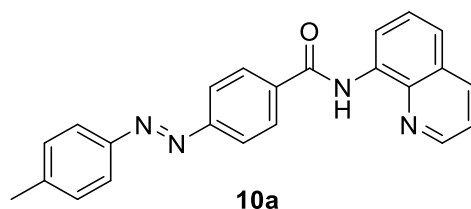

**(E)-N-(Quinolin-8-yl)-4-(p-tolyldiazenyl)benzamide (10a):** The compound **10a** after purification by column chromatography on silica gel (EtOAc:Hexanes = 20:80) as an orange coloured solid; Yield: 38% (280 mg, 2 mmol scale); mp 97-99 °C; IR (DCM): 3354, 1673, 1530, 1484 cm<sup>-1</sup>; <sup>1</sup>H NMR (400 MHz, CDCl<sub>3</sub>): δ 10.84 (s, 1H), 8.98 (d, 1H,  $J = 7.5$  Hz), 8.89 (d, 1H,  $J = 3.8$  Hz), 8.25-8.19 (m, 3H), 8.06 (d, 2H,  $J_1 = 7.8$  Hz), 7.90 (d, 2H,  $J = 7.6$  Hz), 7.65-7.56 (m, 2H), 7.50 (dd, 1H,  $J_1 = 4.1$  Hz,  $J_2 = 8.0$  Hz), 7.36 (d, 2H,  $J_1 = 7.8$  Hz), 2.47 (s, 3H); <sup>13</sup>C NMR (100 MHz, CDCl<sub>3</sub>): δ 164.7, 154.6, 150.7, 148.4, 142.4, 138.8, 136.5, 136.4, 134.4, 129.9, 128.3, 128.0, 127.5, 123.2, 123.0, 121.9, 121.8, 116.6, 21.6; HRMS (ESI):  $m/z$  ( $M + H$ )<sup>+</sup> calcd for C<sub>23</sub>H<sub>19</sub>N<sub>4</sub>O: 367.1559; found 367.1543.

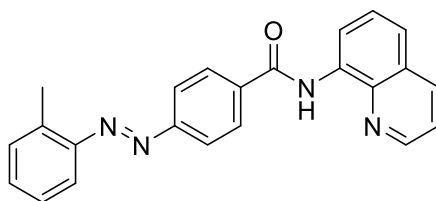

**(E)-N-(quinolin-8-yl)-4-(o-tolyldiazenyl)benzamide (10b):** The compound **10b** was obtained after workup as an orange coloured solid; Yield: 74% (543 mg, 2 mmol scale); mp 175-177 °C; IR (DCM): 3350, 1672, 1530, 1483 cm<sup>-1</sup>; <sup>1</sup>H NMR (400 MHz, CDCl<sub>3</sub>): δ 10.84 (s, 1H), 8.98 (d, 1H,  $J = 7.4$  Hz), 8.88 (dd, 1H,  $J_1 = 4.1$  Hz,  $J_2 = 1.4$  Hz), 8.26-8.19 (m, 3H), 8.08 (d, 2H,  $J = 8.4$  Hz), 7.71 (d, 1H,  $J_1 = 7.9$  Hz), 7.64-7.56 (m, 2H), 7.50 (dd, 1H,  $J_1 = 4.2$  Hz,  $J_2 = 8.2$  Hz), 7.44-7.38 (m, 2H), 7.33-7.28 (m, 1H), 2.79 (s, 3H); <sup>13</sup>C NMR (100 MHz, CDCl<sub>3</sub>): δ 164.7, 154.8, 150.6, 148.4, 138.9, 138.7, 136.5, 136.4, 134.4, 131.7, 131.4, 128.3, 128.0, 127.5, 126.5, 123.2, 121.9, 121.8, 116.6, 115.4, 17.6; HRMS (ESI):  $m/z$  ( $M + H$ )<sup>+</sup> calcd for C<sub>23</sub>H<sub>19</sub>N<sub>4</sub>O: 367.1559; found 367.1551.

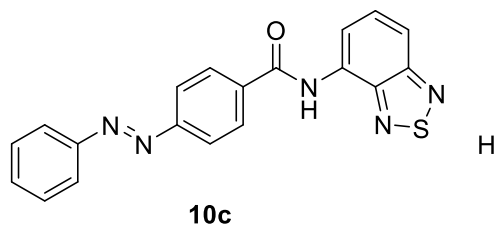

**(E)-N-(Benzo(c)(1,2,5)thiadiazol-4-yl)-4-(phenyldiazenyl)benzamide (10c):** The compound **10c** was obtained after workup as an orange coloured solid; Yield: 70% (250 mg, 1 mmol scale); mp 189-191 °C; IR (DCM): 3316, 1648, 1548, 1410  $\text{cm}^{-1}$ ;  $^1\text{H}$  NMR (400 MHz,  $\text{CDCl}_3$ ):  $\delta$  9.33 (s, 1H), 8.69 (d, 1H,  $J = 7.3$  Hz), 8.20 (d, 1H,  $J = 8.3$  Hz), 8.10 (d, 1H,  $J = 8.2$  Hz), 8.00 (d, 1H,  $J = 8.8$  Hz), 7.76 (d, 1H,  $J = 8.8$  Hz), 7.71-7.67 (m, 1H), 7.59-7.53 (m, 3H);  $^{13}\text{C}$  NMR (100 MHz,  $\text{CDCl}_3$ ):  $\delta$  164.8, 154.8, 154.7, 152.5, 148.0, 135.7, 131.8, 131.2, 129.9, 129.2, 128.3, 123.3, 123.2, 116.2, 115.2; HRMS (ESI):  $m/z$  ( $\text{M} + \text{H}$ ) $^+$  calcd for  $\text{C}_{19}\text{H}_{14}\text{N}_5\text{OS}$ : 360.0919; found 360.0902.

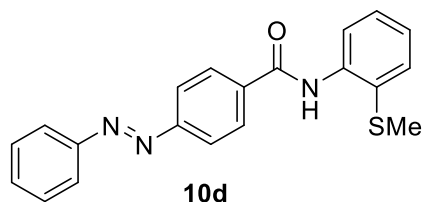

**(E)-N-(2-(Methylthio)phenyl)-4-(phenyldiazenyl)benzamide (10d):** The compound **10d** was obtained after workup as an orange coloured solid; Yield: 69% (238 mg, 1 mmol scale); mp 120-122 °C; IR (DCM): 3339, 1677, 1518, 1434  $\text{cm}^{-1}$ ;  $^1\text{H}$  NMR (400 MHz,  $\text{CDCl}_3$ ):  $\delta$  9.35 (s, 1H), 8.58 (d, 1H,  $J = 8.3$  Hz), 8.14 (d, 1H,  $J = 8.3$  Hz), 8.07 (d, 1H,  $J = 8.3$  Hz), 8.01-7.93 (m, 2H), 7.60-7.53 (m, 4H), 7.41 (t, 1H,  $J = 7.8$  Hz), 7.16 (d, 1H,  $J = 7.6$  Hz), 2.46 (s, 3H);  $^{13}\text{C}$  NMR (100 MHz,  $\text{CDCl}_3$ ):  $\delta$  164.4, 154.5, 152.5, 138.4, 136.4, 133.1, 131.8, 129.2, 129.1, 128.2, 125.9, 124.8, 123.2, 123.2, 120.7, 19.2; HRMS (ESI):  $m/z$  ( $\text{M} + \text{H}$ ) $^+$  calcd for  $\text{C}_{20}\text{H}_{18}\text{N}_3\text{OS}$ : 348.1171; found 348.1186.

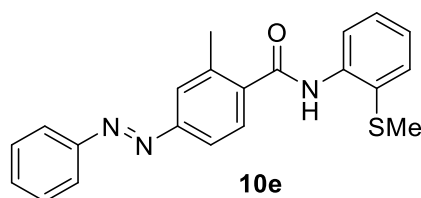

**(E)-2-Methyl-N-(2-(methylthio)phenyl)-4-(phenyldiazenyl)benzamide (10e):** The compound **10e** was obtained after workup as an orange coloured solid; Yield: 96% (448 mg, 1.3 mmol scale); mp 92-94 °C; IR (DCM): 3333, 1678, 1510, 1432  $\text{cm}^{-1}$ ;  $^1\text{H}$  NMR (400 MHz,  $\text{CDCl}_3$ ):  $\delta$  8.75 (s, 1H), 8.54 (d, 1H,  $J = 7.6$  Hz), 7.99-7.97 (m, 2H), 7.87-7.85 (m, 2H), 7.75 (d, 1H,  $J = 8.4$  Hz), 7.59-7.53 (m, 4H), 7.42-7.7.38 (m, 1H), 7.17 (td, 1H,  $J_1 = 7.6$  Hz,  $J_2 = 1.7$  Hz);



Hz), 2.70 (s, 3H), 2.43 (s, 3H);  $^{13}\text{C}$  NMR (~126 MHz,  $\text{CDCl}_3$ ):  $\delta$  166.2, 152.3, 151.5, 137.2, 137.1, 137.0, 131.9, 130.5, 128.1, 127.9, 126.8, 124.6, 123.8, 122.0, 119.7, 119.4, 28.7, 19.2, 18.0; HRMS (ESI):  $m/z$  ( $\text{M} + \text{H}$ ) $^+$  calcd for  $\text{C}_{21}\text{H}_{20}\text{N}_3\text{OS}$ : 362.1327; found 362.1316.

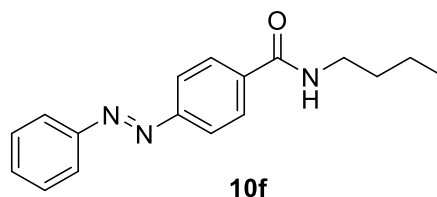

**(E)-N-Butyl-4-(phenyldiazenyl)benzamide (10f):** The compound **10f** was obtained after workup as an orange coloured solid; Yield: 92% (258 mg, 1 mmol scale); mp 92-94 °C; IR (DCM): 3317, 2659, 1633, 1542  $\text{cm}^{-1}$ ;  $^1\text{H}$  NMR (400 MHz,  $\text{CDCl}_3$ ):  $\delta$  7.98-7.91 (m, 6H), 7.56-7.52 (m, 3H), 6.55 (br s, 1H), 3.51-3.46 (m, 2H), 1.67-1.60 (m, 2H), 1.40-1.41 (m, 2H), 0.98 (t, 3H,  $J = 7.3$  Hz);  $^{13}\text{C}$  NMR (100 MHz,  $\text{CDCl}_3$ ):  $\delta$  166.9, 154.1, 152.5, 136.6, 131.6, 129.2, 127.9, 123.1, 122.9, 40.0, 31.7, 20.2, 13.8; HRMS (ESI):  $m/z$  ( $\text{M} + \text{H}$ ) $^+$  calcd for  $\text{C}_{17}\text{H}_{20}\text{N}_3\text{O}$ : 282.1606; found 282.1595.

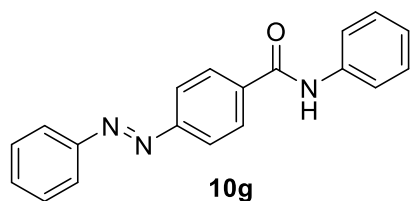

**(E)-N-Phenyl-4-(phenyldiazenyl)benzamide (10g):** The compound **10g** was obtained after purification by column chromatography on silica gel (EtOAc:Hexanes = 20:80) as a pale orange colored solid; Yield: 33% (150 mg, 1.5 mmol scale); mp 205-207 °C;  $R_f = 0.40$  (EtOAc:Hexanes = 20:80); IR (DCM): 3351, 1649, 1527, 1438  $\text{cm}^{-1}$ ;  $^1\text{H}$  NMR (500 MHz,  $\text{DMSO}-d_6$ ):  $\delta$  10.43 (s, 1H), 8.18 (d, 2H,  $J = 8.5$  Hz), 8.02 (d, 2H,  $J = 8.5$  Hz), 7.97-7.95 (m, 2H), 7.81 (d, 2H,  $J = 7.6$  Hz), 7.66-7.61 (m, 3H), 7.40-7.37 (m, 2H), 7.14 (t, 1H,  $J = 7.4$  Hz);  $^{13}\text{C}$  NMR (~126 MHz,  $\text{DMSO}-d_6$ ):  $\delta$  165.2, 153.9, 152.4, 139.5, 137.5, 132.6, 130.0, 129.5, 129.1, 124.4, 123.3, 122.9, 120.9; HRMS (ESI):  $m/z$  ( $\text{M} + \text{H}$ ) $^+$  calcd for  $\text{C}_{19}\text{H}_{16}\text{N}_3\text{O}$ : 302.1293; found 302.1280.

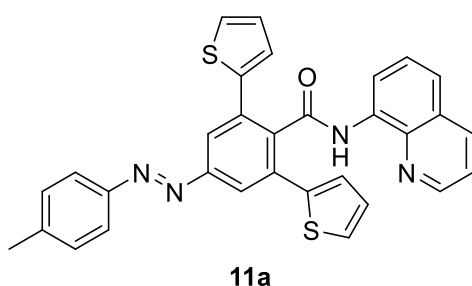

**(E)-N-(Quinolin-8-yl)-2,6-di(thiophen-2-yl)-4-(p-tolyldiazenyl)benzamide (11a):** The compound **11a** was obtained after purification by column chromatography on silica gel (EtOAc:Hexanes = 20:80) as an orange coloured solid; Yield: 50% (40 mg, 0.15 mmol scale); mp 178-180 °C;  $R_f$  = 0.40 (EtOAc:Hexanes = 20:80); IR (DCM): 3335, 1675, 1522, 1483  $\text{cm}^{-1}$ ;  $^1\text{H}$  NMR (400 MHz,  $\text{CDCl}_3$ ):  $\delta$  9.96 (s, 1H), 8.80 (d, 1H,  $J$  = 7.2 Hz), 8.67 (d, 1H,  $J$  = 4.1 Hz), 8.13-8.10 (m, 3H), 7.92 (d, 2H,  $J$  = 7.8 Hz), 7.57-7.50 (m, 2H), 7.43 (d, 2H,  $J$  = 3.4 Hz), 7.40-7.36 (m, 3H), 7.26 (d, 2H,  $J$  = 5.0 Hz), 6.96-6.94 (m, 2H), 2.49 (s, 3H);  $^{13}\text{C}$  NMR (100 MHz,  $\text{CDCl}_3$ ):  $\delta$  166.9, 152.4, 150.7, 148.2, 142.5, 140.4, 138.4, 136.8, 136.1, 134.2, 134.2, 129.9, 127.8, 127.7, 127.5, 127.3, 126.6, 123.9, 123.2, 122.0, 121.6, 116.8, 21.6; HRMS (ESI):  $m/z$  ( $\text{M} + \text{H}$ ) $^+$  calcd for  $\text{C}_{31}\text{H}_{23}\text{N}_4\text{OS}_2$ : 531.1313; found 531.1307.

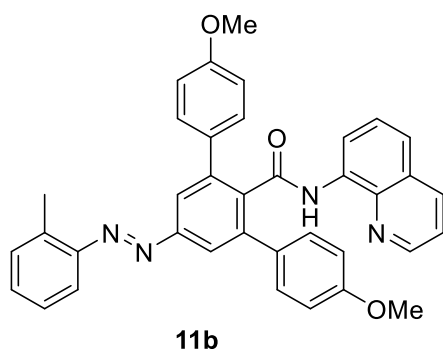

**(E)-4,4''-Dimethoxy-N-(quinolin-8-yl)-5'-(o-tolyldiazenyl)-(1,1':3',1''-terphenyl)-2'-carboxamide (11b):** The compound **11b** was obtained after purification by column chromatography on silica gel (EtOAc:Hexanes = 20:80) as an orange coloured solid; Yield: 47% (54 mg, 0.2 mmol scale); mp 191-193 °C;  $R_f$  = 0.40 (EtOAc:Hexanes = 20:80); IR (DCM): 3340, 1677, 1518, 1518  $\text{cm}^{-1}$ ;  $^1\text{H}$  NMR (400 MHz,  $\text{CDCl}_3$ ):  $\delta$  9.75 (s, 1H), 8.64-8.62 (m, 2H), 8.08 (dd, 1H,  $J_1$  = 8.3 Hz,  $J_2$  = 1.6 Hz), 8.00 (s, 2H), 7.73 (d, 1H,  $J_1$  = 7.6 Hz), 7.66 (dt, 2H,  $J_1$  = 8.7 Hz,  $J_2$  = 0.6 Hz), 7.48-7.31 (m, 6H), 7.40 (dt, 1H,  $J_1$  = 8.8 Hz,  $J_2$  = 2.9 Hz), 3.71 (s, 6H), 2.78 (s, 3H);  $^{13}\text{C}$  NMR (100 MHz,  $\text{CDCl}_3$ ):  $\delta$  167.4, 159.2, 152.8, 150.8, 148.0, 141.4, 138.7, 138.3, 137.6, 136.1, 134.3, 132.4, 131.5, 131.4, 129.9, 127.7, 127.2, 126.5, 123.3, 121.7, 121.5, 116.5, 115.5, 113.9, 55.1, 17.7; HRMS (ESI):  $m/z$  ( $\text{M} + \text{H}$ ) $^+$  calcd for  $\text{C}_{37}\text{H}_{31}\text{N}_4\text{O}_3$ : 579.2396; found 579.2419.

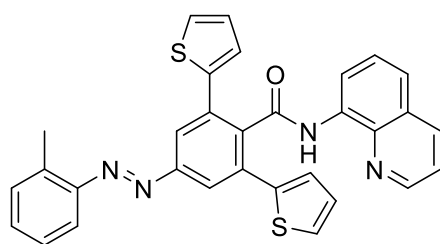

**11c**

**(E)-N-(Quinolin-8-yl)-2,6-di(thiophen-2-yl)-4-(o-tolyldiazenyl)benzamide (11c):** The compound **11c** was obtained after purification by column chromatography on silica gel (EtOAc:Hexanes = 20:80) as an orange coloured solid; Yield: 61% (65 mg, 0.2 mmol scale); mp 146-148 °C;  $R_f$  = 0.40 (EtOAc:Hexanes = 20:80); IR (DCM): 3335, 1676, 1522, 1483  $\text{cm}^{-1}$ ;  $^1\text{H}$  NMR (400 MHz,  $\text{CDCl}_3$ ):  $\delta$  9.97 (s, 1H), 8.81 (d, 1H,  $J$  = 7.2 Hz), 8.67 (d, 1H,  $J$  = 4.0 Hz), 8.13-8.10 (m, 3H), 7.73 (d, 1H,  $J$  = 8.0 Hz), 7.58-7.51 (m, 2H), 7.45-7.37 (m, 5H), 7.33 (t, 1H,  $J$  = 8.0 Hz), 7.27 (d, 2H,  $J$  = 5.3 Hz), 6.96 (t, 1H,  $J$  = 4.0 Hz), 2.79 (s, 3H);  $^{13}\text{C}$  NMR (100 MHz,  $\text{CDCl}_3$ ):  $\delta$  166.9, 152.7, 150.6, 148.2, 140.4, 138.9, 138.4, 136.9, 136.1, 134.2, 134.2, 131.7, 131.5, 127.8, 127.7, 127.5, 127.3, 126.6, 126.5, 124.1, 122.1, 121.6, 116.8, 115.5, 17.7; HRMS (ESI):  $m/z$  ( $M + H$ ) $^+$  calcd for  $\text{C}_{31}\text{H}_{23}\text{N}_4\text{OS}_2$ : 531.1313; found 531.1338.

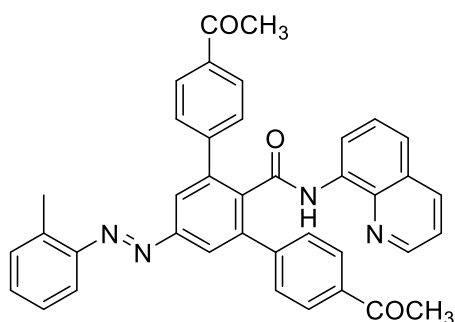

**11d**

**(E)-4,4''-Diacetyl-N-(quinolin-8-yl)-5'-(o-tolyldiazenyl)-(1,1':3',1''-terphenyl)-2'-carboxamide (11d):** The compound **11d** was obtained after purification by column chromatography on silica gel (EtOAc:Hexanes = 40:60) as an orange coloured solid; Yield: 42% (50 mg, 0.2 mmol scale); mp 238-240 °C;  $R_f$  = 0.30 (EtOAc:Hexanes = 40:65); IR (DCM): 3331, 1681, 1522, 1483  $\text{cm}^{-1}$ ;  $^1\text{H}$  NMR (400 MHz,  $\text{CDCl}_3$ ):  $\delta$  9.74 (s, 1H), 8.59 (dd, 1H,  $J_1$  = 4.2 Hz,  $J_2$  = 1.6 Hz), 8.51 (dd, 1H,  $J_1$  = 6.5 Hz,  $J_2$  = 2.4 Hz), 8.09 (dd, 1H,  $J_1$  = 8.3 Hz,  $J_2$  = 1.6 Hz), 8.06 (s, 2H), 7.92 (d, 4H,  $J$  = 8.4 Hz), 7.76-7.71 (m, 5H), 7.49-7.43 (m, 3H), 7.41-7.37 (m, 2H), 7.34-7.30 (m, 1H), 2.77 (s, 3H), 2.51 (s, 6H);  $^{13}\text{C}$  NMR (100 MHz,  $\text{CDCl}_3$ ):  $\delta$  197.7, 166.3, 152.8, 150.6, 148.1, 144.5, 140.9, 140.0, 138.2, 137.4, 136.2, 136.2, 133.7, 131.9, 131.5,

129.0, 128.5, 127.7, 127.2, 126.6, 124.0, 121.2, 121.6, 116.8, 115.5, 26.6, 17.7; HRMS (ESI):  $m/z$  ( $M + H$ )<sup>+</sup> calcd for C<sub>39</sub>H<sub>31</sub>N<sub>4</sub>O<sub>3</sub>: 603.2396; found 603.2383.

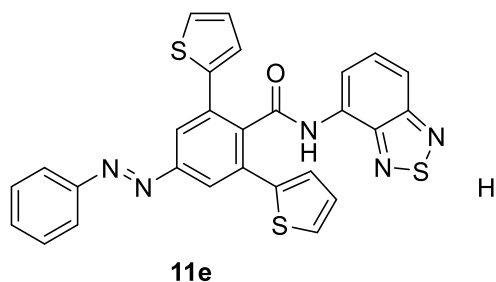

**(E)-N-(Benzo(c)(1,2,5)thiadiazol-4-yl)-4-(phenyldiazenyl)-2,6-di(thiophen-2-**

**yl)benzamide (11e):** The compound **11e** was obtained after purification by column chromatography on silica gel (EtOAc:Hexanes = 10:90) as an orange coloured solid; Yield: 32% (42 mg, 0.25 mmol scale); mp 172-173 °C;  $R_f$  = 0.50 (EtOAc:Hexanes = 20:85); IR (DCM): 1680, 1546, 1521, 1409 cm<sup>-1</sup>; <sup>1</sup>H NMR (400 MHz, CDCl<sub>3</sub>):  $\delta$  9.31 (s, 1H), 8.67 (d, 1H,  $J$  = 7.3 Hz), 8.16 (d, 2H,  $J$  = 8.2 Hz), 8.11 (s, 1H), 8.06 (d, 2H,  $J$  = 8.4 Hz), 8.00-7.97 (m, 3H), 7.75-7.64 (m, 3H), 7.61-7.53 (m, 5H), 7.40 (dd, 1H,  $J_1$  = 3.6 Hz,  $J_2$  = 1.1 Hz), 7.30 (dd, 1H,  $J_1$  = 5.1 Hz,  $J_2$  = 1.0 Hz), 6.98 (dd, 1H,  $J_1$  = 5.1 Hz,  $J_2$  = 3.7 Hz); <sup>13</sup>C NMR (100 MHz, CDCl<sub>3</sub>):  $\delta$  164.8, 154.7, 154.7, 152.5, 148.0, 140.0, 135.7, 134.3, 131.8, 131.1, 130.0, 129.2, 128.3, 127.8, 127.6, 126.9, 124.0, 123.3, 123.2, 116.2, 115.2; HRMS (ESI):  $m/z$  ( $M + H$ )<sup>+</sup> calcd for C<sub>27</sub>H<sub>18</sub>N<sub>5</sub>OS<sub>3</sub>: 524.0673; found 524.0656.

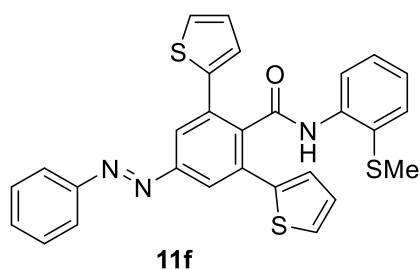

**(E)-N-(2-(Methylthio)phenyl)-4-(phenyldiazenyl)-2,6-di(thiophen-2-yl)benzamide (11f):**

The compound **11f** was obtained after purification by column chromatography on silica gel (EtOAc:Hexanes = 10:90) as an orange coloured solid; Yield: 51% (66 mg, 0.25 mmol scale); mp 112-114 °C;  $R_f$  = 0.50 (EtOAc:Hexanes = 10:90); IR (DCM): 3322, 1679, 1507, 1433 cm<sup>-1</sup>; <sup>1</sup>H NMR (500 MHz, CDCl<sub>3</sub>):  $\delta$  8.41 (s, 1H), 8.30 (dd, 1H,  $J_1$  = 8.2,  $J_2$  = 1.2 Hz), 8.09 (s, 2H), 7.98-7.96 (m, 2H), 7.57-7.52 (m, 3H), 7.42-7.40 (m, 3H), 7.35-7.33 (m, 2H), 7.32-7.28 (m, 1H), 7.07-7.02 (m, 3H), 1.95 (s, 3H); <sup>13</sup>C NMR (~126 MHz, CDCl<sub>3</sub>):  $\delta$  166.7, 152.5, 152.4, 140.2, 138.1, 136.7, 134.0, 133.5, 131.8, 129.2, 129.1, 127.9, 126.8, 125.8, 124.8, 124.0, 123.2,

123.2, 120.9, 18.8; HRMS (ESI): $m/z$  ( $M - H$ )<sup>+</sup> calcd for C<sub>28</sub>H<sub>22</sub>N<sub>3</sub>OS<sub>3</sub>:510.0769; found 510.0749.

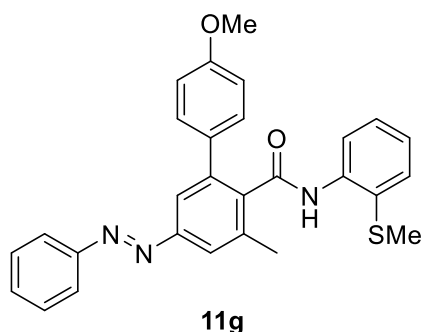

**(E)-4'-Methoxy-3-methyl-N-(2-(methylthio)phenyl)-5-(phenyldiazenyl)-(1,1'-biphenyl)-2-carboxamide (11g):** The compound **11g** was obtained after purification by column chromatography on silica gel (EtOAc:Hexanes = 20:80) as an orange coloured solid; Yield: 41% (38 mg, 0.2 mmol scale); mp 99-101 °C;  $R_f$  = 0.30 (EtOAc:Hexanes = 20:80); IR (DCM): 3327, 1673, 1506, 1431 cm<sup>-1</sup>; <sup>1</sup>H NMR (400 MHz, CDCl<sub>3</sub>):  $\delta$  8.35 (d, 1H,  $J$  = 8.2 Hz), 8.19 (s, 1H), 7.98 (d, 2H,  $J$  = 7.7 Hz), 7.87 (s, 1H), 7.82 (s, 1H), 7.60-7.52 (m, 5H), 7.41 (d, 1H,  $J$  = 7.8 Hz), 7.32 (t, 1H,  $J$  = 8.2 Hz), 7.08 (t, 1H,  $J$  = 7.2 Hz), 6.94 (d, 2H,  $J$  = 8.4 Hz), 3.80 (s, 3H), 2.64 (s, 3H), 2.06 (s, 3H); <sup>13</sup>C NMR (100 MHz, CDCl<sub>3</sub>):  $\delta$  168.0, 159.4, 152.6, 152.6, 139.8, 138.2, 137.9, 137.3, 132.8, 132.0, 131.4, 129.9, 129.2, 128.7, 126.1, 124.8, 123.0, 122.9, 122.3, 120.8, 114.1, 55.3, 19.9, 18.8; HRMS (ESI):  $m/z$  ( $M + H$ )<sup>+</sup> calcd for C<sub>28</sub>H<sub>26</sub>N<sub>3</sub>O<sub>2</sub>S: 468.1746; found 468.1738.

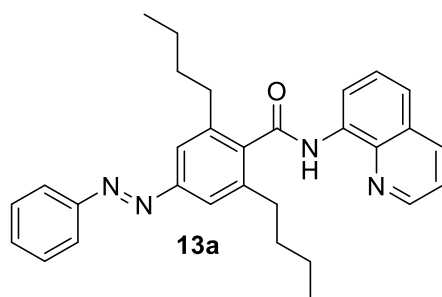

**(E)-2,6-Dibutyl-4-(phenyldiazenyl)-N-(quinolin-8-yl)benzamide (13a):** The compound **13a** was obtained after purification by column chromatography on silica gel (EtOAc:Hexanes = 5:95) as an orange coloured solid; Yield: 88% (41 mg, 0.1 mmol scale);  $R_f$  = 0.70 (EtOAc:Hexanes = 10:90); IR (DCM): 3334, 2956, 1678, 1521 cm<sup>-1</sup>; <sup>1</sup>H NMR (400 MHz, CDCl<sub>3</sub>):  $\delta$  10.01 (s, 1H), 9.03 (d, 1H,  $J$  = 7.3 Hz), 8.77 (d, 1H,  $J$  = 1.7 Hz), 8.22 (d, 1H,  $J$  = 8.2 Hz), 7.99-7.98 (m, 2H), 7.75 (s, 2H), 7.69-7.52 (m, 5H), 7.49-7.47 (m, 1H), 2.84 (t, 4H,  $J$

= 7.8 Hz), 1.84-1.74 (m, 4H), 1.40-1.32 (m, 4H), 0.86 (t, 6H,  $J = 7.3$  Hz);  $^{13}\text{C}$  NMR (100 MHz,  $\text{CDCl}_3$ ):  $\delta$  168.3, 152.7, 148.3, 140.9, 139.6, 138.5, 136.4, 134.3, 131.1, 129.1, 128.0, 127.5, 122.9, 122.1, 121.8, 121.2, 116.8, 33.7, 33.3, 22.7, 13.9; HRMS (ESI):  $m/z$  ( $\text{M} + \text{H}$ ) $^+$  calcd for  $\text{C}_{30}\text{H}_{33}\text{N}_4\text{O}$ : 465.2654; found 465.2633.

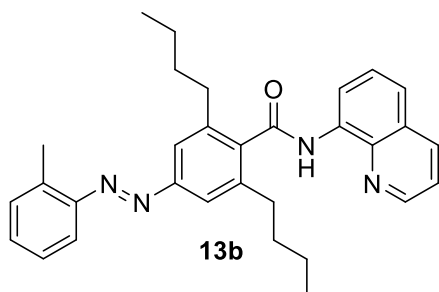

**(E)-2,6-Dibutyl-N-(quinolin-8-yl)-4-(o-tolyldiazenyl)benzamide (13b):** The compound **13b** was obtained after purification by column chromatography on silica (EtOAc:Hexanes = 10:90) as an orange coloured liquid; Yield: 64% (46 mg, 0.15 mmol scale);  $R_f = 0.70$  (EtOAc:Hexanes = 20:80); IR (DCM): 3345, 2956, 1678, 1521  $\text{cm}^{-1}$ ;  $^1\text{H}$  NMR (400 MHz,  $\text{CDCl}_3$ ):  $\delta$  10.00 (s, 1H), 9.02 (dd, 1H,  $J_1 = 7.3$  Hz,  $J_2 = 1.4$  Hz), 8.78 (dd, 1H,  $J_1 = 4.2$  Hz,  $J_2 = 1.6$  Hz), 8.22 (dd, 1H,  $J_1 = 8.3$  Hz,  $J_2 = 1.6$  Hz), 7.72 (s, 2H), 7.68-7.64 (m, 2H), 7.61 (dd, 1H,  $J_1 = 8.3$  Hz,  $J_2 = 1.4$  Hz), 7.48 (dd, 1H,  $J_1 = 8.3$  Hz,  $J_2 = 4.2$  Hz), 7.43-7.38 (m, 2H), 7.34-7.29 (m, 1H), 2.83 (t, 4H,  $J = 8.0$  Hz), 2.78 (s, 3H), 1.80-1.72 (m, 4H), 1.39-1.32 (m, 4H), 0.84 (t, 6H,  $J = 7.4$  Hz);  $^{13}\text{C}$  NMR (100 MHz,  $\text{CDCl}_3$ ):  $\delta$  168.3, 153.1, 150.9, 148.3, 140.8, 139.4, 138.5, 138.2, 136.4, 134.3, 131.3, 131.1, 128.0, 127.5, 126.5, 122.1, 121.8, 121.3, 116.8, 115.5, 33.6, 33.3, 22.6, 17.6, 13.9; HRMS (ESI):  $m/z$  ( $\text{M} + \text{H}$ ) $^+$  calcd for  $\text{C}_{31}\text{H}_{35}\text{N}_4\text{O}$ : 479.2811; found 479.2792.

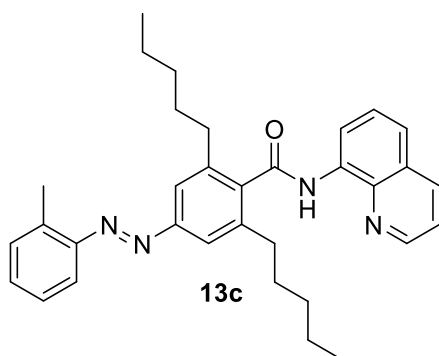

**(E)-2,6-Dipentyl-N-(quinolin-8-yl)-4-(o-tolyldiazenyl)benzamide (13c):** The compound **13c** was obtained after purification by column chromatography on silica (EtOAc:Hexanes = 10:90) as an orange coloured liquid; Yield: 83% (63 mg, 0.15 mmol scale);  $R_f = 0.70$  (EtOAc:Hexanes = 20:80); IR (DCM): 3344, 2928, 1678, 1520  $\text{cm}^{-1}$ ;  $^1\text{H}$  NMR (400 MHz,  $\text{CDCl}_3$ ):  $\delta$  10.01 (s,

1H), 9.03 (dd, 1H,  $J_1 = 7.4$  Hz,  $J_2 = 1.5$  Hz), 8.76 (dd, 1H,  $J_1 = 4.2$  Hz,  $J_2 = 1.6$  Hz), 8.22 (dd, 1H,  $J_1 = 8.3$  Hz,  $J_2 = 1.6$  Hz), 7.73 (s, 2H), 7.68-7.65 (m, 2H), 7.62 (dd, 1H,  $J_1 = 8.3$  Hz,  $J_2 = 1.5$  Hz), 7.45 (dd, 1H,  $J_1 = 8.3$  Hz,  $J_2 = 4.2$  Hz), 7.44-7.38 (m, 2H), 7.34-7.30 (m, 1H), 2.83 (t, 4H,  $J = 8.0$  Hz), 2.79 (s, 3H), 1.82-1.75 (m, 4H), 1.36-1.24 (m, 8H), 0.80 (t, 6H,  $J = 7.1$  Hz);  $^{13}\text{C}$  NMR (100 MHz,  $\text{CDCl}_3$ ):  $\delta$  168.3, 153.1, 150.9, 148.3, 140.8, 139.5, 138.5, 136.4, 134.3, 131.3, 131.1, 128.0, 127.5, 126.5, 122.1, 121.7, 121.3, 116.8, 115.5, 33.5, 31.7, 31.1, 22.5, 17.6, 13.9; HRMS (ESI):  $m/z$  ( $\text{M} + \text{H}$ ) $^+$  calcd for  $\text{C}_{33}\text{H}_{39}\text{N}_4\text{O}$ : 507.3124; found 507.3145.

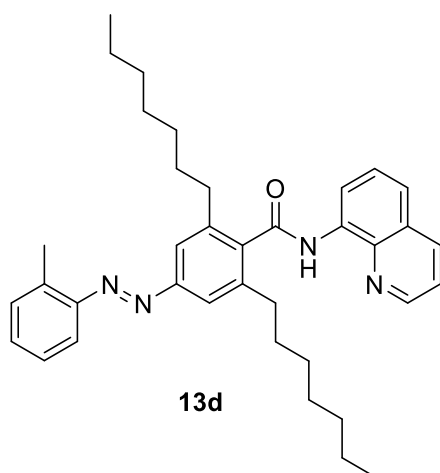

**(E)-2,6-Diheptyl-N-(quinolin-8-yl)-4-(o-tolyldiazenyl)benzamide (13d):** The compound **13d** was obtained after purification by column chromatography on silica (EtOAc:Hexanes = 10:90) as an orange coloured liquid; Yield: 51% (44 mg, 0.15 mmol scale);  $R_f = 0.80$  (EtOAc:Hexanes = 20:80); IR (DCM): 3345, 2926, 1678, 1520  $\text{cm}^{-1}$ ;  $^1\text{H}$  NMR (400 MHz,  $\text{CDCl}_3$ ):  $\delta$  10.01 (s, 1H), 9.03 (dd, 1H,  $J_1 = 7.4$  Hz,  $J_2 = 1.5$  Hz), 8.76 (dd, 1H,  $J_1 = 4.2$  Hz,  $J_2 = 1.6$  Hz), 8.22 (dd, 1H,  $J_1 = 8.3$  Hz,  $J_2 = 1.6$  Hz), 7.73 (s, 2H), 7.68-7.64 (m, 2H), 7.61 (dd, 1H,  $J_1 = 8.3$  Hz,  $J_2 = 1.5$  Hz), 7.48 (dd, 1H,  $J_1 = 8.3$  Hz,  $J_2 = 4.2$  Hz), 7.44-7.38 (m, 2H), 7.34-7.30 (m, 1H), 2.83 (t, 4H,  $J = 8.0$  Hz), 2.79 (s, 3H), 1.82-1.74 (m, 4H), 1.37-1.29 (m, 4H), 1.24-1.14 (m, 12H), 0.78 (t, 6H,  $J = 7.0$  Hz);  $^{13}\text{C}$  NMR (100 MHz,  $\text{CDCl}_3$ ):  $\delta$  168.3, 153.1, 150.9, 148.3, 140.8, 139.4, 138.5, 138.2, 136.3, 134.3, 131.3, 131.1, 128.0, 127.5, 126.5, 122.0, 121.7, 121.3, 116.8, 115.5, 33.5, 31.6, 31.5, 29.5, 29.0, 22.6 17.6, 14.0; HRMS (ESI):  $m/z$  ( $\text{M} + \text{H}$ ) $^+$  calcd for  $\text{C}_{37}\text{H}_{47}\text{N}_4\text{O}$ : 563.3750; found 563.3733.

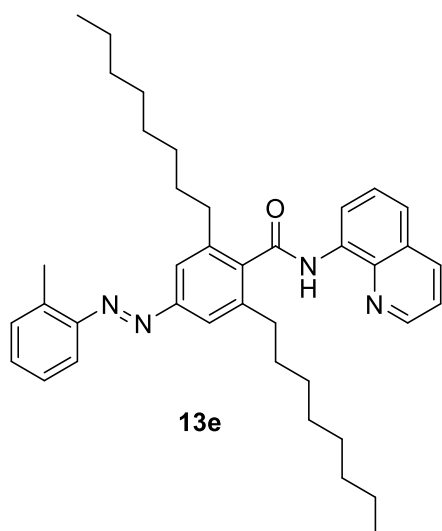

**(E)-2,6-Dioctyl-N-(quinolin-8-yl)-4-(o-tolyldiazenyl)benzamide (13e):** The compound **13e** was obtained after purification by column chromatography on silica (EtOAc:Hexanes = 10:90) as an orange coloured liquid; Yield: 76% (67 mg, 0.15 mmol scale);  $R_f$  = 0.80 (EtOAc:Hexanes = 20:80); IR (DCM): 3345, 2926, 1679, 1521  $\text{cm}^{-1}$ ;  $^1\text{H}$  NMR (400 MHz,  $\text{CDCl}_3$ ):  $\delta$  10.01 (s, 1H), 9.03 (dd, 1H,  $J_1 = 7.4$  Hz,  $J_2 = 1.4$  Hz), 8.76 (dd, 1H,  $J_1 = 4.2$  Hz,  $J_2 = 1.6$  Hz), 8.22 (dd, 1H,  $J_1 = 8.3$  Hz,  $J_2 = 1.6$  Hz), 7.72 (s, 2H), 7.68-7.64 (m, 2H), 7.61 (dd, 1H,  $J_1 = 8.2$  Hz,  $J_2 = 1.4$  Hz), 7.48 (dd, 1H,  $J_1 = 8.2$  Hz,  $J_2 = 4.2$  Hz), 7.43-7.38 (m, 2H), 7.34-7.30 (m, 1H), 2.83 (t, 4H,  $J = 8.1$  Hz), 2.78 (s, 3H), 1.82-1.74 (m, 4H), 1.37-1.29 (m, 6H), 1.25-1.10 (m, 14H), 0.81 (t, 6H,  $J = 7.1$  Hz);  $^{13}\text{C}$  NMR (100 MHz,  $\text{CDCl}_3$ ):  $\delta$  168.3, 153.1, 150.9, 148.3, 140.8, 139.4, 138.5, 138.2, 136.5, 134.3, 131.3, 131.1, 128.0, 127.5, 126.5, 120.1, 121.7, 121.3, 116.8, 115.5, 33.5, 31.8, 31.5, 29.6, 29.3, 29.1, 22.6, 17.6, 14.1; HRMS (ESI):  $m/z$  ( $\text{M} + \text{H}$ ) $^+$  calcd for  $\text{C}_{39}\text{H}_{51}\text{N}_4\text{O}$ : 591.4063; found 591.4038.

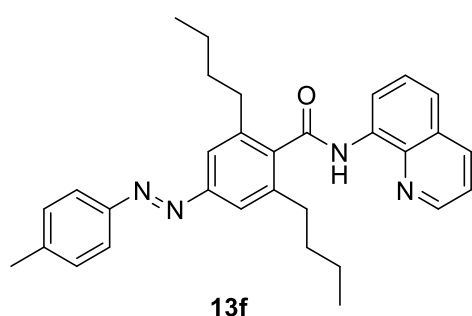

**(E)-2,6-Dibutyl-N-(quinolin-8-yl)-4-(p-tolyldiazenyl)benzamide (13f):** The compound **13f** was obtained after purification by column chromatography on silica (EtOAc:Hexanes = 10:90) as an orange coloured liquid; Yield: 35% (21 mg, 0.125 mmol scale);  $R_f$  = 0.70 (EtOAc:Hexanes = 20:80); IR (DCM): 3345, 2956, 1678, 1520  $\text{cm}^{-1}$ ;  $^1\text{H}$  NMR (400 MHz,



CDCl<sub>3</sub>):  $\delta$  9.99 (s, 1H), 9.01 (dd, 1H,  $J_1 = 7.3$  Hz,  $J_2 = 1.2$  Hz), 8.77 (dd, 1H,  $J_1 = 4.2$  Hz,  $J_2 = 1.4$  Hz), 8.22 (dd, 1H,  $J_1 = 8.3$  Hz,  $J_2 = 1.4$  Hz), 7.89 (d, 2H,  $J = 8.2$  Hz), 7.72 (s, 2H), 7.68-7.64 (m, 1H), 7.61 (dd, 1H,  $J_1 = 8.2$  Hz,  $J_2 = 1.2$  Hz), 7.48 (dd, 1H,  $J_1 = 8.2$  Hz,  $J_2 = 4.2$  Hz), 7.36 (d, 2H,  $J = 8.2$  Hz), 2.82 (t, 4H,  $J = 8.0$  Hz), 2.48 (s, 3H), 1.81-1.73 (m, 4H), 1.40-1.31 (m, 4H), 0.84 (t, 6H,  $J = 7.4$  Hz); <sup>13</sup>C NMR (100 MHz, CDCl<sub>3</sub>):  $\delta$  168.3, 152.8, 150.8, 148.3, 141.7, 140.8, 139.3, 138.5, 136.3, 134.3, 129.8, 128.0, 127.5, 122.9, 122.0, 121.7, 121.1, 116.8, 33.7, 33.3, 22.7 21.6, 13.9; HRMS (ESI):  $m/z$  (M + H)<sup>+</sup> calcd for C<sub>31</sub>H<sub>35</sub>N<sub>4</sub>O: 479.2811; found 479.2826.

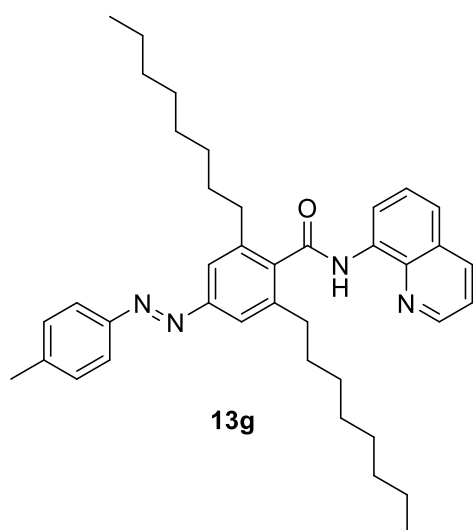

**(E)-2,6-Dioctyl-N-(quinolin-8-yl)-4-(p-tolyldiazenyl)benzamide (13g):** The compound **13g** was obtained after purification by column chromatography on silica (EtOAc:Hexanes = 10:90) as an orange coloured liquid; Yield: 64% (57 mg, 0.15 mmol scale);  $R_f = 0.80$  (EtOAc:Hexanes = 20:80); IR (DCM): 3345, 2926, 1678, 1520 cm<sup>-1</sup>; <sup>1</sup>H NMR (400 MHz, CDCl<sub>3</sub>):  $\delta$  10.00 (s, 1H), 9.02 (dd, 1H,  $J_1 = 7.4$  Hz,  $J_2 = 1.5$  Hz), 8.76 (dd, 1H,  $J_1 = 4.2$  Hz,  $J_2 = 1.6$  Hz), 8.22 (dd, 1H,  $J_1 = 8.3$  Hz,  $J_2 = 1.6$  Hz), 7.89 (d, 2H,  $J = 8.2$  Hz), 7.71 (s, 2H), 7.68-7.64 (m, 1H), 7.61 (dd, 1H,  $J_1 = 8.3$  Hz,  $J_2 = 1.5$  Hz), 7.48 (dd, 1H,  $J_1 = 8.3$  Hz,  $J_2 = 4.2$  Hz), 7.36 (d, 2H,  $J = 8.1$  Hz), 2.82 (t, 4H,  $J = 8.1$  Hz), 2.48 (s, 3H), 1.84-1.73 (m, 4H), 1.34-1.28 (m, 4H), 1.22-1.10 (m, 16H), 0.81 (t, 6H,  $J = 7.8$  Hz); <sup>13</sup>C NMR (100 MHz, CDCl<sub>3</sub>):  $\delta$  168.4, 152.9, 150.9, 148.3, 141.7, 140.9, 139.3, 138.5, 136.3, 134.3, 129.8, 128.0, 127.5, 123.0, 122.0, 121.7, 121.1, 116.8, 33.6, 31.8, 31.5, 29.6, 29.3, 29.1, 22.6 21.6, 14.1; HRMS (ESI):  $m/z$  (M + H)<sup>+</sup> calcd for C<sub>39</sub>H<sub>51</sub>N<sub>4</sub>O: 591.4063; found 591.4045.

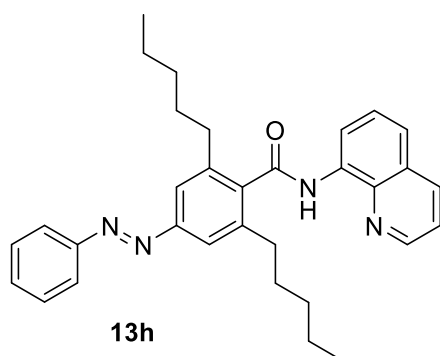

**(E)-2,6-Dipentyl-4-(phenyldiazenyl)-N-(quinolin-8-yl)benzamide (13h):** The compound **13h** was obtained after purification by column chromatography on silica gel (EtOAc:Hexanes = 5:95) as an orange coloured liquid; Yield: 64% (47 mg, 0.15 mmol scale);  $R_f$  = 0.70 (EtOAc:Hexanes = 10:90); IR (DCM): 3344, 2955, 1678, 1521  $\text{cm}^{-1}$ ;  $^1\text{H}$  NMR (400 MHz,  $\text{CDCl}_3$ ):  $\delta$  10.02 (s, 1H), 9.04 (d, 1H,  $J$  = 7.3 Hz), 8.78 (d, 1H,  $J$  = 3.8 Hz), 8.21 (d, 1H,  $J$  = 8.2 Hz), 8.00-7.93 (m, 2H), 7.79-7.74 (m, 2H), 7.69-7.52 (m, 5H), 7.48 (dd, 1H,  $J_1$  = 8.2 Hz,  $J_2$  = 4.1 Hz), 2.84 (t, 4H,  $J$  = 7.8 Hz), 1.81-1.76 (m, 4H), 1.32-1.24 (m, 8H), 0.80 (t, 6H,  $J$  = 7.0 Hz);  $^{13}\text{C}$  NMR (~126 MHz,  $\text{CDCl}_3$ ):  $\delta$  168.3, 152.8, 152.8, 148.3, 140.9, 139.6, 138.5, 136.3, 134.3, 131.1, 129.1, 128.0, 127.5, 122.9, 122.0, 121.7, 121.2, 116.8, 33.5, 31.8, 31.1, 22.4, 13.9; HRMS (ESI):  $m/z$  ( $M + H$ ) $^+$  calcd for  $\text{C}_{32}\text{H}_{37}\text{N}_4\text{O}$ : 493.2967; found 493.2964.

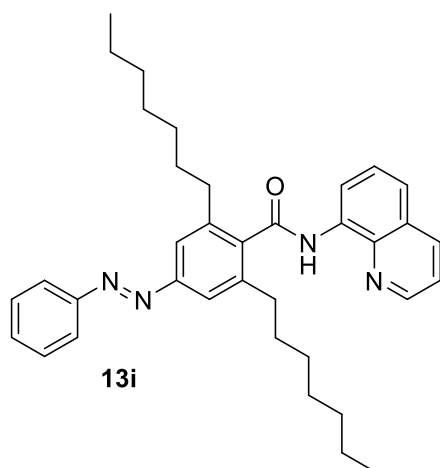

**(E)-2,6-Diheptyl-4-(phenyldiazenyl)-N-(quinolin-8-yl)benzamide (13i):** The compound **13i** was obtained after purification by column chromatography on silica (EtOAc:Hexanes = 10:90) as an orange coloured liquid; Yield: 68% (56 mg, 0.15 mmol scale);  $R_f$  = 0.70 (EtOAc:Hexanes = 20:80); IR (DCM): 3343, 2926, 1678, 1521  $\text{cm}^{-1}$ ;  $^1\text{H}$  NMR (400 MHz,  $\text{CDCl}_3$ ):  $\delta$  10.00 (s, 1H), 9.05 (d, 1H,  $J$  = 7.3 Hz), 8.76 (dd, 1H,  $J_1$  = 4.1 Hz,  $J_2$  = 1.4 Hz), 8.22 (d, 1H,  $J$  = 8.2 Hz), 7.99-7.92 (m, 2H), 7.77-7.52 (m, 7H), 7.48 (dd, 1H,  $J_1$  = 8.3 Hz,  $J_2$  = 4.2 Hz), 2.82 (t, 4H,  $J$  =

7.9 Hz), 1.81-1.84 (m, 4H), 1.36-1.13 (m, 16H), 0.77 (t, 6H,  $J = 6.8$  Hz);  $^{13}\text{C}$  NMR (~126 MHz,  $\text{CDCl}_3$ ):  $\delta$  168.2, 152.8, 152.8, 148.3, 140.9, 139.6, 138.5, 136.3, 134.3, 131.1, 129.1, 128.0, 127.5, 122.9, 122.0, 121.7, 121.2, 116.8, 33.5, 31.6, 31.5, 29.5, 29.0, 22.0, 14.0; HRMS (ESI):  $m/z$  ( $\text{M} + \text{H}$ ) $^+$  calcd for  $\text{C}_{36}\text{H}_{45}\text{N}_4\text{O}$ : 549.3593; found 549.3572.

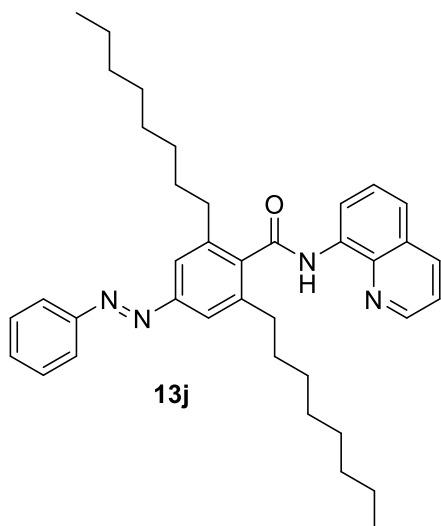

**(E)-2,6-Dioctyl-4-(phenyldiazenyl)-N-(quinolin-8-yl)benzamide (13j):** The compound **13j** was obtained after purification by column chromatography on silica (EtOAc:Hexanes = 10:90) as an orange coloured liquid; Yield: 79% (68 mg, 0.15 mmol scale);  $R_f = 0.80$  (EtOAc:Hexanes = 20:80); IR (DCM): 3344, 2923, 1678, 1520  $\text{cm}^{-1}$ ;  $^1\text{H}$  NMR (400 MHz,  $\text{CDCl}_3$ ):  $\delta$  10.02 (s, 1H), 9.04 (dd, 1H,  $J_1 = 7.4$  Hz,  $J_2 = 1.4$  Hz), 8.77 (dd, 1H,  $J_1 = 4.2$  Hz,  $J_2 = 1.6$  Hz), 8.22 (dd, 1H,  $J_1 = 8.3$  Hz,  $J_2 = 1.6$  Hz), 8.00-7.98 (m, 2H), 7.75 (s, 2H), 7.68-7.65 (m, 1H), 7.63-7.60 (m, 1H), 7.59-7.55 (m, 2H), 7.54-7.51 (m, 1H), 7.48 (dd, 1H,  $J_1 = 8.3$  Hz,  $J_2 = 4.2$  Hz), 2.84 (t, 4H,  $J = 8.2$  Hz), 1.83-1.75 (m, 4H), 1.35-1.28 (m, 6H), 1.24-1.13 (m, 14H), 0.82 (t, 6H,  $J = 7.2$  Hz);  $^{13}\text{C}$  NMR (100 MHz,  $\text{CDCl}_3$ ):  $\delta$  168.3, 152.8, 152.7, 148.3, 140.9, 139.6, 138.5, 136.3, 134.3, 131.1, 129.1, 128.1, 127.5, 122.9, 122.1, 121.7, 121.2, 116.8, 35.6, 31.8, 31.5, 29.6, 29.3, 29.1, 22.6, 14.1; HRMS (ESI):  $m/z$  ( $\text{M} + \text{H}$ ) $^+$  calcd for  $\text{C}_{38}\text{H}_{49}\text{N}_4\text{O}$ : 577.3906; found 577.3928.

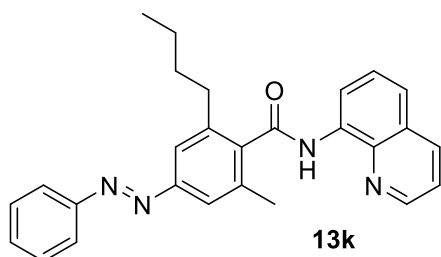

**(E)-2-Butyl-6-methyl-4-(phenyldiazenyl)-N-(quinolin-8-yl)benzamide (13k):** The compound **13k**, was obtained after purification by column chromatography on silica gel (EtOAc:Hexanes = 10:90) as an orange coloured liquid; Yield: 24% (15 mg, 0.15 mmol scale);  $R_f = 0.40$  (EtOAc:Hexanes = 15:85); IR (DCM): 3338, 1674, 1521, 1482  $\text{cm}^{-1}$ ;  $^1\text{H NMR}$  (500 MHz,  $\text{CDCl}_3$ ):  $\delta$  9.98 (s, 1H), 8.99 (dd, 1H,  $J_1 = 7.4$ ,  $J_2 = 1.5$  Hz), 8.75 (dd, 1H,  $J_1 = 4.2$ ,  $J_2 = 1.6$  Hz), 8.20 (dd, 1H,  $J_1 = 8.2$ ,  $J_2 = 1.6$  Hz), 7.96-7.94 (m, 2H), 7.72 (d, 1H,  $J = 1.3$  Hz), 7.67-7.66 (m, 1H), 7.63 (t, 1H,  $J = 8.2$  Hz), 7.59 (dd, 1H,  $J_1 = 8.3$ ,  $J_2 = 1.4$  Hz), 7.56-7.49 (m, 3H), 7.46 (dd, 1H,  $J_1 = 8.3$ ,  $J_2 = 4.2$  Hz), 2.82 (t, 2H,  $J = 8.0$  Hz), 2.53 (s, 3H), 1.78-1.72 (m, 2H), 1.38-1.32 (m, 2H), 0.83 (t, 3H,  $J = 7.4$  Hz);  $^{13}\text{C NMR}$  (100 MHz,  $\text{CDCl}_3$ ):  $\delta$  168.3, 152.7, 152.7, 148.4, 140.9, 139.8, 138.5, 136.4, 135.9, 134.3, 131.2, 129.2, 128.0, 127.4, 122.9, 122.1, 121.8, 121.8, 121.6, 116.9, 33.7, 33.2, 22.7, 19.7, 13.9; HRMS (ESI):  $m/z$  ( $M + H$ ) $^+$  calcd for  $\text{C}_{27}\text{H}_{27}\text{N}_4\text{O}_3$ : 423.2185; found 423.2168.

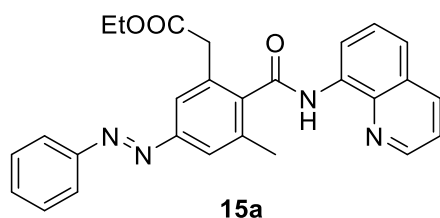

**Ethyl (E)-2-(3-methyl-5-(phenyldiazenyl)-2-(quinolin-8-ylcarbamoyl)phenyl)acetate (15a):** The compound **15a** was obtained after purification by column chromatography on silica gel (EtOAc:Hexanes = 20:80) as an orange coloured solid; Yield: 60% (34 mg, 0.125 mmol scale); mp 95-97  $^{\circ}\text{C}$ ;  $R_f = 0.30$  (EtOAc:Hexanes = 20:80); IR (DCM): 3337, 1734, 1674, 1523  $\text{cm}^{-1}$ ;  $^1\text{H NMR}$  (400 MHz,  $\text{CDCl}_3$ ):  $\delta$  10.13 (s, 1H), 9.03 (dd, 1H,  $J_1 = 7.2$  Hz,  $J_2 = 1.6$  Hz), 8.79 (dd, 1H,  $J_1 = 4.2$  Hz,  $J_2 = 1.6$  Hz), 8.21 (dd, 1H,  $J_1 = 8.3$  Hz,  $J_2 = 1.6$  Hz), 7.99-7.96 (m, 2H), 7.82 (s, 1H), 7.81 (s, 1H), 7.67-7.62 (m, 2H), 7.60-7.52 (m, 3H), 7.47 (dd, 1H,  $J_1 = 8.3$  Hz,  $J_2 = 4.2$  Hz), 4.03 (q, 2H,  $J = 7.1$  Hz), 3.93 (s, 2H), 2.60 (s, 3H), 1.04 (t, 3H,  $J = 7.1$  Hz);  $^{13}\text{C NMR}$  (100 MHz,  $\text{CDCl}_3$ ):  $\delta$  171.0, 167.5, 152.6, 152.6, 148.4, 140.1, 138.6, 136.4, 136.3, 134.2, 132.5, 131.3, 129.2, 128.0, 127.4, 123.6, 123.0, 122.7, 122.3, 121.8, 117.0, 61.1, 39.1, 18.8, 19.8, 13.9; HRMS (ESI):  $m/z$  ( $M + H$ ) $^+$  calcd for  $\text{C}_{27}\text{H}_{25}\text{N}_4\text{O}_3$ : 453.1927; found 453.1944.

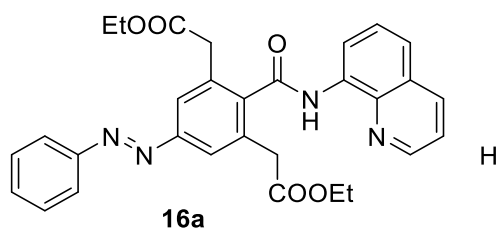

**Diethyl 2,2'-(5-(phenyldiazenyl)-2-(quinolin-8-ylcarbamoyl)-1,3-phenylene)(*E*)-diacetate (16a):** The compound **16a** was obtained after purification by column chromatography on silica gel (EtOAc:Hexanes = 20:80) as an orange coloured semisolid; Yield: 46% (24 mg, 0.1 mmol scale);  $R_f = 0.30$  (EtOAc:Hexanes = 20:80); IR (DCM): 3330, 1734, 1672, 1524  $\text{cm}^{-1}$ ;  $^1\text{H NMR}$  (400 MHz,  $\text{CDCl}_3$ ):  $\delta$  10.20 (s, 1H), 9.00 (d, 1H,  $J = 6.6$  Hz), 8.79 (br s, 1H), 8.21 (d, 1H,  $J = 8.2$  Hz), 7.97 (d, 2H,  $J = 7.2$  Hz), 7.92 (s, 2H), 7.67-7.61 (m, 2H), 7.58-7.52 (m, 3H), 7.48-7.46 (m, 1H), 7.36-7.35 (m, 1H), 4.03 (q, 4H,  $J = 7.1$  Hz), 3.92 (s, 4H), 1.04 (t, 6H,  $J = 7.1$  Hz);  $^{13}\text{C NMR}$  (100 MHz,  $\text{CDCl}_3$ ):  $\delta$  170.8, 166.9, 152.6, 152.5, 148.4, 140.1, 138.6, 136.3, 134.1, 132.9, 131.5, 129.2, 128.0, 127.3, 124.1, 123.1, 122.5, 121.8, 117.2, 61.2, 39.2, 13.9; HRMS (ESI):  $m/z$  ( $M + H$ ) $^+$  calcd for  $\text{C}_{30}\text{H}_{29}\text{N}_4\text{O}_5$ : 525.2138; found 525.2114.

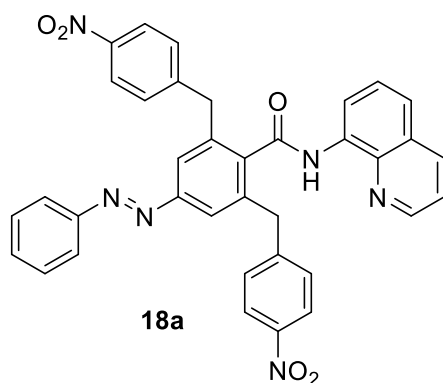

**(*E*)-2,6-Bis(4-nitrobenzyl)-4-(phenyldiazenyl)-*N*-(quinolin-8-yl)benzamide (18a):** The compound **18a** was obtained after purification by column chromatography on silica gel (EtOAc:Hexanes = 30:70) as an orange coloured solid; Yield: 45% (45 mg, 0.16 mmol); mp 168-170  $^{\circ}\text{C}$ ;  $R_f = 0.30$  (EtOAc:Hexanes = 30:70); IR (DCM): 1672, 1519, 1484, 1345  $\text{cm}^{-1}$ ;  $^1\text{H NMR}$  (400 MHz,  $\text{CDCl}_3$ ):  $\delta$  9.43 (s, 1H), 8.81 (dd, 1H,  $J_1 = 6.1$  Hz,  $J_2 = 2.6$  Hz), 8.47 (d, 1H,  $J = 8.2$  Hz), 8.16 (d, 1H,  $J = 8.2$  Hz), 7.96-7.95 (m, 2H), 7.88 (d, 4H,  $J = 8.3$  Hz), 7.81 (s, 2H), 7.63-7.51 (m, 5H), 7.40 (dd, 1H,  $J_1 = 8.2$  Hz,  $J_2 = 4.2$  Hz), 7.34 (d, 4H,  $J = 8.4$  Hz), 4.31 (s, 4H);  $^{13}\text{C NMR}$  (100 MHz,  $\text{CDCl}_3$ ):  $\delta$  166.9, 152.9, 152.4, 148.2, 147.2, 146.3, 139.9, 138.1, 137.8, 136.4, 133.3, 131.8, 129.7, 129.3, 127.7, 127.2, 123.7, 123.5, 123.1, 122.7, 121.9, 116.6, 39.4; HRMS (ESI):  $m/z$  ( $M + H$ ) $^+$  calcd for  $\text{C}_{36}\text{H}_{27}\text{N}_6\text{O}_5$ : 623.2043; found 623.2062.

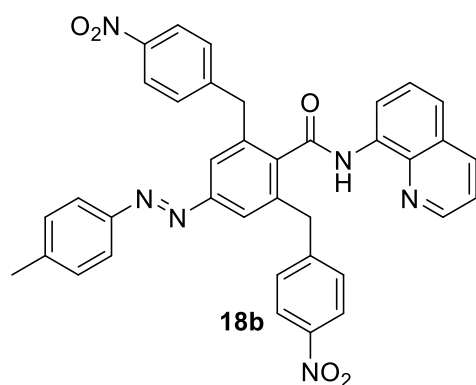

**(E)-2,6-Bis(4-nitrobenzyl)-N-(quinolin-8-yl)-4-(p-tolyldiazenyl)benzamide (18b):** The compound **18b** was obtained after purification by column chromatography on silica gel (EtOAc:Hexanes = 30:70) as an orange coloured solid; Yield: 30% (38 mg, 0.2 mmol scale); mp 92-94 °C;  $R_f$  = 0.30 (EtOAc:Hexanes = 30:70); IR (DCM): 3326, 1672, 1519, 1345  $\text{cm}^{-1}$ ;  $^1\text{H}$  NMR (400 MHz,  $\text{CDCl}_3$ ):  $\delta$  9.41 (s, 1H), 8.80 (dd, 1H,  $J_1 = 6.1$  Hz,  $J_2 = 2.0$  Hz), 8.46 (d, 1H,  $J = 4.0$  Hz), 8.15 (d, 1H,  $J = 8.2$  Hz), 7.88-7.85 (m, 6H), 7.79 (s, 2H), 7.62-7.58 (m, 2H), 7.41-7.33 (m, 7H), 4.30 (s, 4H), 2.47 (s, 3H);  $^{13}\text{C}$  NMR (100 MHz,  $\text{CDCl}_3$ ):  $\delta$  166.9, 153.0, 150.6, 148.1, 147.3, 146.3, 142.6, 140.0, 138.0, 137.8, 136.4, 133.4, 129.9, 129.7, 127.7, 127.2, 123.7, 123.4, 123.1, 122.7, 121.9, 116.5, 39.4, 21.6; HRMS (ESI):  $m/z$  ( $M + H$ ) $^+$  calcd for  $\text{C}_{37}\text{H}_{29}\text{N}_6\text{O}_5$ : 637.2199; found 637.2231.

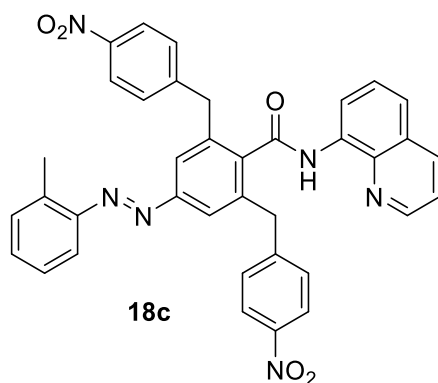

**(E)-2,6-Bis(4-nitrobenzyl)-N-(quinolin-8-yl)-4-(o-tolyldiazenyl)benzamide (18c):** The compound **18c** was obtained after purification by column chromatography on silica gel (EtOAc:Hexanes = 40:60) as an orange coloured solid; Yield: 52% (66 mg, 0.2 mmol scale); mp 187-189 °C;  $R_f$  = 0.30 (EtOAc:Hexanes = 40:60); IR (DCM): 1672, 1519, 1483, 1344  $\text{cm}^{-1}$ ;  $^1\text{H}$  NMR (400 MHz,  $\text{CDCl}_3$ ):  $\delta$  9.46 (s, 1H), 8.82 (d, 1H,  $J = 6.4$  Hz), 8.48 (d, 1H,  $J = 4.1$  Hz), 8.16 (d, 1H,  $J = 8.3$  Hz), 7.88 (d, 4H,  $J = 8.1$  Hz), 7.78 (s, 2H), 7.66-7.60 (m, 3H), 7.44-7.27 (m, 8H), 4.32 (s, 4H), 2.73 (s, 3H);  $^{13}\text{C}$  NMR (100 MHz,  $\text{CDCl}_3$ ):  $\delta$  166.9, 153.3, 150.5,

148.2, 147.3, 146.3, 139.7, 138.8, 138.1, 137.8, 136.4, 133.4, 131.8, 131.5, 129.8, 127.7, 127.2, 126.6, 123.7, 123.5, 122.7, 121.9, 116.6, 115.4, 39.4, 17.6; HRMS (ESI):  $m/z$  ( $M + H$ )<sup>+</sup> calcd for C<sub>37</sub>H<sub>29</sub>N<sub>6</sub>O<sub>5</sub>: 637.2199; found 637.2226.

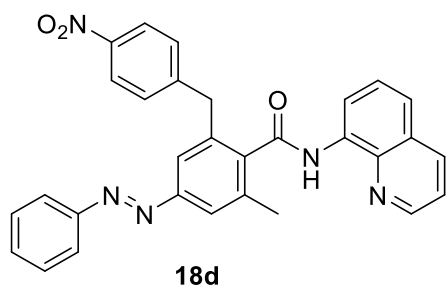

**(E)-2-Methyl-6-(4-nitrobenzyl)-4-(phenyldiazenyl)-N-(quinolin-8-yl)benzamide (18d):**

The compound **18d** was obtained after purification by column chromatography on silica gel (EtOAc:Hexanes = 20:80) as an orange coloured solid; Yield: 61% (46 mg, 0.15 mmol scale); mp 174-176 °C;  $R_f$  = 0.30 (EtOAc:Hexanes = 20:80); IR (DCM): 3335, 1673, 1521, 1482 cm<sup>-1</sup>; <sup>1</sup>H NMR (400 MHz, CDCl<sub>3</sub>):  $\delta$  9.65 (s, 1H), 8.91 (d, 1H,  $J$  = 7.0 Hz), 8.60 (d, 1H,  $J$  = 4.1 Hz), 8.18 (d, 1H,  $J$  = 4.1 Hz), 7.97 (d, 2H,  $J$  = 7.2 Hz), 7.83-7.79 (m, 3H), 7.74 (s, 1H), 7.65-7.52 (m, 5H), 7.43 (dd, 1H,  $J_1$  = 8.2,  $J_2$  = 4.2 Hz), 7.33 (d, 2H,  $J$  = 8.5 Hz), 4.30 (s, 2H), 2.58 (s, 3H); <sup>13</sup>C NMR (100 MHz, CDCl<sub>3</sub>):  $\delta$  167.6, 152.7, 152.5, 148.3, 147.7, 146.2, 140.0, 138.1, 137.5, 136.6, 136.4, 133.8, 131.5, 129.7, 129.2, 127.8, 127.3, 123.6, 123.1, 123.0, 122.7, 122.5, 121.8, 116.7, 39.5, 19.7; HRMS (ESI):  $m/z$  ( $M + H$ )<sup>+</sup> calcd for C<sub>30</sub>H<sub>24</sub>N<sub>5</sub>O<sub>3</sub>: 502.1879; found 502.1860.

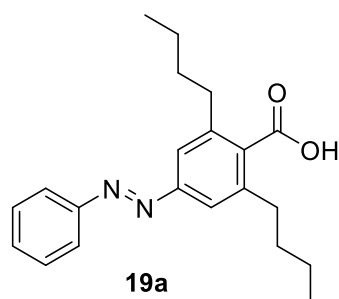

**(E)-2,6-Dibutyl-4-(phenyldiazenyl)benzoic acid (19a):** The compound (**19a**) was obtained after workup as an orange coloured solid; Yield: 95% (24 mg, 0.075 mmol scale); mp 101-103 °C; IR (DCM): 2928, 2958, 1695, 1462 cm<sup>-1</sup>; <sup>1</sup>H NMR (500 MHz, CDCl<sub>3</sub>):  $\delta$  7.94-7.92 (m 2 H), 7.65 (s, 2H), 7.55-7.49 (m, 3H), 2.80 (t, 4H,  $J$  = 8.0 Hz), 1.74-1.68 (m, 4H), 1.46-1.39 (m, 4H), 0.96 (t, 6H,  $J$  = 7.4 Hz); <sup>13</sup>C NMR (100 MHz, CDCl<sub>3</sub>):  $\delta$  175.1, 152.9, 152.6, 141.2, 134.4,

131.3, 129.2, 123.0, 121.2, 33.7, 33.5, 22.7, 13.9; HRMS (ESI):  $m/z$  ( $M + H$ )<sup>+</sup> calcd for C<sub>21</sub>H<sub>27</sub>N<sub>2</sub>O<sub>2</sub>:339.2073; found 339.2059.

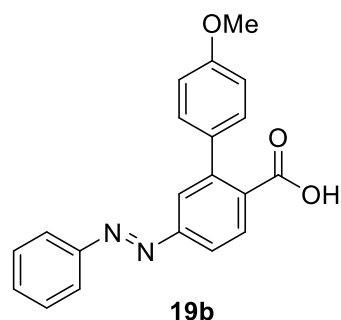

**(E)-4'-Methoxy-5-(phenyldiazenyl)-(1,1'-biphenyl)-2-carboxylic acid (19b):** The compound **19b** was obtained after workup as an orange coloured solid; Yield: 66% (21 mg, 0.098 mmol scale); mp 210-212 °C; IR (DCM): 2924, 2357, 1695, 1253 cm<sup>-1</sup>; <sup>1</sup>H NMR (400 MHz, DMSO-*d*<sub>6</sub>): δ 7.96-7.90 (m, 4H), 7.83 (s, 1H), 7.63-7.62 (m, 3H), 7.38 (d, 2H, *J* = 7.8 Hz), 7.02 (d, 2H, *J* = 7.9 Hz), 3.82 (s, 3H); <sup>13</sup>C NMR (100 MHz, DMSO-*d*<sub>6</sub>): δ 169.8, 159.4, 153.0, 152.3, 142.1, 132.7, 132.7, 132.6, 131.1, 130.8, 130.1, 130.0, 130.0, 124.7, 123.3, 123.0, 121.0, 114.2; HRMS (ESI):  $m/z$  ( $M - H$ )<sup>+</sup> calcd for C<sub>20</sub>H<sub>15</sub>N<sub>2</sub>O<sub>3</sub>: 333.1083; found 331.1070.

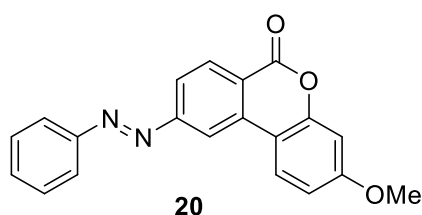

**(E)-3-Methoxy-9-(phenyldiazenyl)-6H-benzo(c)chromen-6-one (20):** The compound **20** was obtained after workup as an orange coloured solid; Yield: 61% (24 mg, 0.12 mmol scale); mp 215-217 °C; IR (DCM): 1735, 1611, 1430, 1289 cm<sup>-1</sup>; <sup>1</sup>H NMR (400 MHz, CDCl<sub>3</sub>): δ 8.53-8.51 (m, 2H), 8.11 (d, 1H, *J* = 8.9 Hz), 8.05-7.99 (m, 3H), 7.63-7.58 (m, 3H), 6.99 (dd, 1H, *J*<sub>1</sub> = 8.8 Hz, *J*<sub>2</sub> = 2.6 Hz), 6.92 (d, 1H, *J* = 2.5 Hz), 3.93 (s, 3H); <sup>13</sup>C NMR (100 MHz, CDCl<sub>3</sub>): δ 161.8, 161.0, 156.1, 152.8, 152.4, 136.4, 132.2, 131.9, 129.3, 124.2, 123.4, 121.0, 120.8, 116.5, 112.2, 111.1, 101.6, 55.7; HRMS (ESI):  $m/z$  ( $M + H$ )<sup>+</sup> calcd for C<sub>20</sub>H<sub>15</sub>N<sub>2</sub>O<sub>3</sub>: 331.1083; found 331.1068.
